# Supplementary material for: A Revised Mid-Pliocene Composite Section for ODP Site 846
Source: Copernicus journal article supplement (doi:10.5194/cp-2019-133), 2020-02-21
Supplement: Supplementary file 1 [file Table S1 846B conductivity log.xls]

## Sheet: 846B_norminvcond_80_157_min
TABLE S1: 846 CONDUCTIVITY LOG
log depth (m)	minimum conductivity	detrended and normalized (-) conductivity
79.9998	27.1311	-0.983734
80.0024	27.1583	-1.00264
80.0049	27.1449	-0.993422
80.0075	27.1154	-0.97316
80.01	27.075	-0.945288
80.0125	27.0378	-0.919622
80.0151	27.036	-0.918494
80.0176	27.0805	-0.949349
80.0202	27.1403	-0.990808
80.0227	27.1949	-1.02865
80.0252	27.2398	-1.05976
80.0278	27.2827	-1.08951
80.0303	27.3234	-1.11772
80.0329	27.3627	-1.14499
80.0354	27.3981	-1.16956
80.0379	27.4409	-1.19922
80.0405	27.4863	-1.2307
80.043	27.5138	-1.24982
80.0456	27.5333	-1.26341
80.0481	27.5668	-1.28663
80.0506	27.6637	-1.35375
80.0532	27.8687	-1.49554
80.0557	28.1968	-1.72253
80.0583	28.5123	-1.9408
80.0608	28.3944	-1.85936
80.0633	28.1947	-1.72132
80.0659	28.0756	-1.63906
80.0684	28.0743	-1.63825
80.071	28.1575	-1.69589
80.0735	28.2714	-1.77472
80.076	28.3423	-1.82384
80.0786	28.3531	-1.83136
80.0811	28.2992	-1.7942
80.0837	28.2272	-1.74446
80.0862	28.1299	-1.67728
80.0887	28.0392	-1.61466
80.0913	27.9793	-1.57333
80.0938	28.018	-1.60016
80.0964	28.1404	-1.68488
80.0989	28.3249	-1.81259
80.1014	28.5687	-1.98122
80.104	28.8235	-2.15748
80.1065	28.7753	-2.12423
80.1091	28.7213	-2.08704
80.1116	28.6796	-2.05826
80.1141	28.6573	-2.04293
80.1167	28.373	-1.84641
80.1192	27.9709	-1.56849
80.1218	27.6621	-1.35502
80.1243	27.4844	-1.23225
80.1268	27.5607	-1.28509
80.1294	27.8436	-1.48079
80.1319	27.6836	-1.37025
80.1345	27.6692	-1.36037
80.137	27.7294	-1.40209
80.1395	27.8447	-1.48188
80.1421	27.9993	-1.58891
80.1446	28.1601	-1.70018
80.1472	28.3002	-1.79713
80.1497	28.3815	-1.85342
80.1522	28.3046	-1.80034
80.1548	28.2455	-1.75958
80.1573	28.2044	-1.73121
80.1599	28.1799	-1.71437
80.1624	28.1816	-1.7156
80.1649	28.1885	-1.72049
80.1675	28.1632	-1.70304
80.17	28.1167	-1.671
80.1726	28.0481	-1.6237
80.1751	27.9578	-1.56132
80.1776	27.8585	-1.49272
80.1802	27.7652	-1.42833
80.1827	27.6918	-1.37766
80.1853	27.6464	-1.34629
80.1878	27.5076	-1.25041
80.1903	27.218	-1.05028
80.1929	27.1534	-1.0057
80.1954	27.2507	-1.07303
80.198	27.4512	-1.2118
80.2005	27.6576	-1.35461
80.203	27.7103	-1.39108
80.2056	27.7777	-1.43779
80.2081	27.8571	-1.4928
80.2107	27.9343	-1.54627
80.2132	27.9912	-1.58568
80.2157	28.0177	-1.60412
80.2183	28.0211	-1.60657
80.2208	27.9927	-1.58698
80.2234	27.9322	-1.54521
80.2259	27.8402	-1.48172
80.2284	27.7105	-1.39208
80.231	27.5614	-1.28909
80.2335	27.4177	-1.18981
80.2361	27.302	-1.10988
80.2386	27.236	-1.06433
80.2411	27.2404	-1.06745
80.2437	27.2891	-1.10126
80.2462	27.3683	-1.15607
80.2488	27.4677	-1.22491
80.2513	27.5591	-1.28822
80.2538	27.6262	-1.33472
80.2564	27.6745	-1.36817
80.2589	27.6924	-1.38064
80.2615	27.679	-1.37146
80.264	27.6538	-1.3541
80.2665	27.6136	-1.32636
80.2691	27.5489	-1.28174
80.2716	27.4766	-1.23181
80.2742	27.4036	-1.18144
80.2767	27.323	-1.12578
80.2792	27.2396	-1.06818
80.2818	27.1574	-1.01146
80.2843	27.0652	-0.947771
80.2869	26.9533	-0.870504
80.2894	26.8331	-0.787495
80.2919	26.7191	-0.708773
80.2945	26.6278	-0.645709
80.297	26.5686	-0.604845
80.2996	26.5437	-0.587708
80.3021	26.546	-0.58939
80.3046	26.561	-0.599833
80.3072	26.5803	-0.613315
80.3097	26.5959	-0.624124
80.3123	26.3888	-0.481029
80.3148	26.3134	-0.429019
80.3173	26.3986	-0.487996
80.3199	26.5374	-0.584074
80.3224	26.6016	-0.628503
80.325	26.6035	-0.62996
80.3275	26.6173	-0.639546
80.33	26.6433	-0.657636
80.3326	26.6806	-0.683468
80.3351	26.7362	-0.722047
80.3377	26.8092	-0.772619
80.3402	26.8765	-0.819219
80.3427	26.8642	-0.810826
80.3453	26.4594	-0.530979
80.3478	26.3021	-0.422289
80.3504	26.4277	-0.509205
80.3529	26.8505	-0.801671
80.3554	26.782	-0.75439
80.358	26.5805	-0.615147
80.3605	26.4782	-0.544487
80.3631	26.5174	-0.571646
80.3656	26.4465	-0.522761
80.3681	26.3904	-0.484054
80.3707	26.3441	-0.452093
80.3732	26.3073	-0.42678
80.3758	26.2793	-0.407444
80.3783	26.2549	-0.39065
80.3808	26.2355	-0.377376
80.3834	26.2209	-0.367382
80.3859	26.2111	-0.36069
80.3885	26.1388	-0.310716
80.391	25.9505	-0.180638
80.3935	25.909	-0.151992
80.3961	25.9458	-0.17754
80.3986	26.0099	-0.221976
80.4012	25.941	-0.17438
80.4037	25.9081	-0.151743
80.4062	25.9154	-0.156889
80.4088	25.8421	-0.106265
80.4113	25.6572	0.0215241
80.4139	25.5111	0.122398
80.4164	25.4087	0.193127
80.4189	25.3374	0.242392
80.4215	25.299	0.268801
80.424	25.304	0.265287
80.4266	25.3504	0.233114
80.4291	25.4186	0.185858
80.4316	25.4913	0.135551
80.4342	25.5014	0.128445
80.4367	25.2523	0.300619
80.4393	25.0528	0.438452
80.4418	24.9305	0.522934
80.4443	24.904	0.541167
80.4469	24.9597	0.502577
80.4494	25.063	0.43105
80.452	25.182	0.348725
80.4545	25.2569	0.296822
80.457	25.261	0.293909
80.4596	25.1955	0.339112
80.4621	25.0643	0.429728
80.4647	24.8831	0.554941
80.4672	24.7226	0.665824
80.4697	24.5898	0.757594
80.4723	24.5077	0.814255
80.4748	24.4907	0.825904
80.4774	24.5333	0.796367
80.4799	24.6223	0.734755
80.4824	24.7631	0.63729
80.485	24.928	0.52322
80.4875	25.0258	0.455496
80.4901	24.9933	0.477894
80.4926	24.9688	0.494757
80.4951	24.9548	0.504333
80.4977	24.9505	0.507197
80.5002	24.9539	0.504803
80.5028	24.9622	0.498989
80.5053	24.9705	0.493152
80.5078	24.9687	0.494284
80.5104	24.9582	0.501463
80.5129	24.949	0.507719
80.5155	24.8742	0.55936
80.518	24.7556	0.641332
80.5205	24.679	0.694214
80.5231	24.7502	0.644893
80.5256	24.9677	0.494414
80.5282	25.1346	0.378878
80.5307	25.1475	0.369894
80.5332	25.1487	0.368952
80.5358	25.1543	0.365012
80.5383	25.165	0.357515
80.5409	25.1776	0.3487
80.5434	25.1911	0.339301
80.5459	25.2072	0.328091
80.5485	25.229	0.312943
80.551	25.2656	0.287543
80.5536	25.3191	0.250434
80.5561	25.3831	0.206136
80.5586	25.4446	0.163478
80.5612	25.4932	0.129805
80.5637	25.5162	0.113851
80.5663	25.5075	0.119737
80.5688	25.4239	0.177473
80.5713	25.2756	0.279934
80.5739	25.1547	0.363438
80.5764	25.0516	0.43463
80.579	24.9512	0.504
80.5815	24.8468	0.576105
80.584	24.7443	0.646903
80.5866	24.6911	0.683615
80.5891	24.6913	0.683329
80.5917	24.7466	0.645017
80.5942	24.8438	0.57777
80.5967	24.9768	0.485692
80.5993	25.1396	0.373025
80.6018	25.3175	0.249928
80.6044	25.4713	0.143519
80.6069	25.5682	0.0764307
80.6094	25.5808	0.0676265
80.612	25.5118	0.115215
80.6145	25.3958	0.195369
80.6171	25.276	0.278091
80.6196	25.193	0.335378
80.6221	25.1639	0.355436
80.6247	25.1689	0.351884
80.6272	25.1928	0.33528
80.6298	25.2317	0.308314
80.6323	25.2731	0.27963
80.6348	25.3159	0.249909
80.6374	24.9675	0.490764
80.6399	24.7203	0.661576
80.6425	24.5827	0.756614
80.645	24.5242	0.797029
80.6475	24.5185	0.800851
80.6501	24.5314	0.791829
80.6526	24.5482	0.780127
80.6552	24.5625	0.770172
80.6577	24.5763	0.760573
80.6602	24.5949	0.747627
80.6628	24.6217	0.728979
80.6653	24.6565	0.704852
80.6679	24.6913	0.680653
80.6704	24.7188	0.661552
80.6729	24.7384	0.647949
80.6755	24.7511	0.639087
80.678	24.7565	0.635254
80.6806	24.755	0.636183
80.6831	24.7496	0.639846
80.6856	24.7397	0.646606
80.6882	24.7238	0.657533
80.6907	24.6962	0.676554
80.6933	24.6508	0.707859
80.6958	24.5897	0.749995
80.6983	24.515	0.801577
80.7009	24.4303	0.860015
80.7034	24.3554	0.911777
80.706	24.2836	0.961323
80.7085	24.221	1.00451
80.711	24.1675	1.04138
80.7136	24.1306	1.06686
80.7161	24.1065	1.08341
80.7187	24.0898	1.0949
80.7212	24.0992	1.08829
80.7237	24.1535	1.05069
80.7263	24.234	0.994897
80.7288	24.208	1.01285
80.7314	24.1875	1.02691
80.7339	24.1728	1.03701
80.7364	24.1619	1.04443
80.739	24.1574	1.04744
80.7415	24.1585	1.04661
80.7441	24.1646	1.0423
80.7466	24.1687	1.0394
80.7491	24.1596	1.04562
80.7517	24.1305	1.06565
80.7542	24.0803	1.10022
80.7568	24.009	1.14946
80.7593	23.9414	1.1961
80.7618	23.9098	1.21786
80.7644	23.9215	1.20974
80.7669	23.9676	1.17774
80.7695	24.0318	1.13324
80.772	24.0754	1.10301
80.7745	24.099	1.08662
80.7771	24.1769	1.03267
80.7796	24.2242	0.999896
80.7822	24.1551	1.0476
80.7847	24.0705	1.10598
80.7872	23.9994	1.1551
80.7898	23.9418	1.19481
80.7923	23.8955	1.22677
80.7949	23.8703	1.24408
80.7974	23.8813	1.23641
80.7999	23.9086	1.21743
80.8025	23.9514	1.18775
80.805	24.0088	1.14798
80.8076	24.0681	1.10687
80.8101	24.1183	1.07209
80.8126	24.1645	1.04002
80.8152	24.2124	1.00684
80.8177	24.256	0.976595
80.8203	24.2912	0.952209
80.8228	24.3151	0.935598
80.8253	24.3199	0.93216
80.8279	24.3084	0.940058
80.8304	24.2902	0.95253
80.833	24.2845	0.956384
80.8355	24.1755	1.03164
80.838	24.0709	1.10394
80.8406	23.9988	1.15366
80.8431	23.9742	1.17061
80.8457	24.0529	1.11606
80.8482	24.2462	0.982317
80.8507	24.4185	0.863099
80.8533	24.3832	0.887461
80.8558	24.3394	0.917649
80.8584	24.3029	0.942807
80.8609	24.2877	0.953246
80.8634	24.2907	0.95106
80.866	24.3138	0.935005
80.8685	24.3675	0.897761
80.8711	24.4278	0.85597
80.8736	24.2502	0.978732
80.8761	23.9727	1.17051
80.8787	23.7745	1.30751
80.8812	23.6103	1.42097
80.8838	23.5004	1.49682
80.8863	23.4547	1.52833
80.8888	23.4223	1.55065
80.8914	23.4152	1.55554
80.8939	23.4409	1.53765
80.8965	23.4929	1.50158
80.899	23.5643	1.45214
80.9015	23.6498	1.39295
80.9041	23.6997	1.35833
80.9066	23.6517	1.39147
80.9092	23.4193	1.55206
80.9117	23.1438	1.74249
80.9142	22.8858	1.92079
80.9168	23.0404	1.81377
80.9193	23.9198	1.20567
80.9219	24.0529	1.11354
80.9244	24.0874	1.0896
80.9269	24.1723	1.03076
80.9295	23.9444	1.18827
80.932	23.4421	1.5355
80.9346	22.9801	1.85492
80.9371	22.6317	2.09571
80.9396	22.4444	2.22517
80.9422	22.4009	2.25514
80.9447	22.4847	2.19709
80.9473	22.6447	2.08635
80.9498	22.8316	1.95704
80.9523	23.022	1.8253
80.9549	23.216	1.6911
80.9574	23.4253	1.54629
80.96	23.6501	1.39076
80.9625	23.9069	1.21308
80.965	24.19	1.01728
80.9676	24.4727	0.821709
80.9701	24.7111	0.656778
80.9727	24.8933	0.530683
80.9752	24.9566	0.486862
80.9777	24.8351	0.570771
80.9803	24.5762	0.74967
80.9828	24.2322	0.987493
80.9854	23.8845	1.22779
80.9879	23.5683	1.44634
80.9904	23.3797	1.57673
80.993	23.3222	1.61638
80.9955	23.3865	1.57185
80.9981	23.503	1.49117
81.0006	23.6748	1.3723
81.0031	23.8432	1.25577
81.0057	23.9711	1.16723
81.0082	24.0396	1.11981
81.0108	24.0433	1.11717
81.0133	24.0013	1.14609
81.0158	23.9443	1.18544
81.0184	23.9102	1.20893
81.0209	23.9503	1.18109
81.0235	24.0146	1.13656
81.026	24.0799	1.09135
81.0285	24.1547	1.03953
81.0311	24.24	0.980435
81.0336	24.3109	0.931311
81.0362	24.4079	0.864157
81.0387	24.5424	0.771049
81.0412	24.6787	0.676758
81.0438	24.7964	0.595284
81.0463	24.8877	0.532096
81.0489	24.9718	0.473793
81.0514	25.0327	0.431604
81.0539	25.066	0.408528
81.0565	25.0686	0.406601
81.059	25.0264	0.435717
81.0616	24.9188	0.510059
81.0641	24.7894	0.599416
81.0666	24.6432	0.700438
81.0692	24.5156	0.788554
81.0717	24.4068	0.863715
81.0743	24.2995	0.937815
81.0768	24.1691	1.02791
81.0793	24.033	1.12195
81.0819	23.9083	1.20806
81.0844	23.8189	1.26982
81.087	23.7985	1.28383
81.0895	23.8263	1.26451
81.092	23.9086	1.20756
81.0946	24.0149	1.13396
81.0971	24.1299	1.05433
81.0997	24.2508	0.970636
81.1022	24.3849	0.877832
81.1047	24.5013	0.797267
81.1073	24.5749	0.74628
81.1098	24.6161	0.71772
81.1124	24.6018	0.727499
81.1149	24.5842	0.739626
81.1174	24.6115	0.720616
81.12	24.7651	0.614304
81.1225	25.0926	0.38779
81.1251	25.5287	0.0861376
81.1276	25.8686	-0.148985
81.1301	25.9358	-0.19553
81.1327	26.0149	-0.250299
81.1352	26.125	-0.326494
81.1378	26.2939	-0.443399
81.1403	26.3293	-0.467955
81.1428	26.24	-0.40625
81.1454	26.1941	-0.374634
81.1479	26.187	-0.369803
81.1505	26.2042	-0.38177
81.153	26.2548	-0.416836
81.1555	26.3398	-0.47571
81.1581	26.4341	-0.540997
81.1606	26.5805	-0.642341
81.1632	26.7502	-0.759792
81.1657	26.6675	-0.702637
81.1682	26.5055	-0.59071
81.1708	26.3722	-0.498646
81.1733	26.2673	-0.426188
81.1759	26.3526	-0.485259
81.1784	26.5913	-0.650384
81.1809	26.7875	-0.786149
81.1835	26.5709	-0.636444
81.186	26.4035	-0.520825
81.1886	26.3377	-0.475373
81.1911	26.3527	-0.48585
81.1936	26.4298	-0.539282
81.1962	26.5784	-0.642074
81.1987	26.8316	-0.81726
81.2013	27.0937	-0.998548
81.2038	27.0562	-0.97271
81.2063	27.0598	-0.975318
81.2089	27.105	-1.00664
81.2114	27.1862	-1.06291
81.214	27.3345	-1.1655
81.2165	27.4995	-1.27969
81.219	27.6437	-1.37946
81.2216	27.8489	-1.52146
81.2241	27.7919	-1.48213
81.2267	27.7595	-1.4598
81.2292	27.7379	-1.44495
81.2317	27.7383	-1.44531
81.2343	27.7692	-1.4668
81.2368	27.8884	-1.54927
81.2394	28.0383	-1.653
81.2419	28.1847	-1.75435
81.2444	28.1523	-1.73206
81.247	28.1565	-1.73501
81.2495	28.1895	-1.75794
81.2521	28.2393	-1.79243
81.2546	28.2824	-1.82235
81.2571	28.319	-1.84775
81.2597	28.3307	-1.8559
81.2622	28.3355	-1.85932
81.2648	28.3091	-1.84115
81.2673	28.3117	-1.84304
81.2698	28.3565	-1.87409
81.2724	28.2149	-1.77624
81.2749	28.0289	-1.64772
81.2775	27.9333	-1.58172
81.28	27.9049	-1.56218
81.2825	27.9365	-1.58407
81.2851	27.9856	-1.61815
81.2876	27.8944	-1.55513
81.2902	27.7831	-1.47832
81.2927	27.7316	-1.44278
81.2952	27.7246	-1.438
81.2978	27.6717	-1.40151
81.3003	27.5855	-1.34201
81.3029	27.5657	-1.32836
81.3054	27.6324	-1.37461
81.3079	27.7415	-1.45012
81.3105	27.8796	-1.54572
81.313	28.0154	-1.63969
81.3156	28.1039	-1.701
81.3181	28.1512	-1.73375
81.3206	28.1753	-1.75053
81.3232	28.1772	-1.75189
81.3257	28.1489	-1.73247
81.3283	28.0125	-1.63817
81.3308	27.887	-1.55154
81.3333	27.7704	-1.47097
81.3359	27.6686	-1.40065
81.3384	27.6019	-1.35465
81.341	27.5595	-1.32541
81.3435	27.5169	-1.29605
81.346	27.4906	-1.27795
81.3486	27.4738	-1.2664
81.3511	27.4683	-1.26269
81.3537	27.4777	-1.26929
81.3562	27.5045	-1.28788
81.3587	27.5352	-1.30917
81.3613	27.5622	-1.32794
81.3638	27.5937	-1.34981
81.3664	27.4898	-1.27807
81.3689	27.4437	-1.24623
81.3714	27.5922	-1.34902
81.374	27.8191	-1.50604
81.3765	27.8906	-1.55551
81.3791	27.9689	-1.60978
81.3816	28.0692	-1.6792
81.3841	28.1882	-1.76159
81.3867	28.308	-1.84453
81.3892	28.4167	-1.91973
81.3918	28.4873	-1.96865
81.3943	28.512	-1.98581
81.3968	28.4897	-1.97049
81.3994	28.439	-1.93552
81.4019	28.3795	-1.89448
81.4045	28.3301	-1.86042
81.407	28.2976	-1.83802
81.4095	28.2946	-1.83601
81.4121	28.3167	-1.85139
81.4146	28.3561	-1.87869
81.4172	28.3936	-1.90472
81.4197	28.4193	-1.92261
81.4222	28.4219	-1.92444
81.4248	28.4174	-1.92143
81.4273	28.4104	-1.91671
81.4299	28.4156	-1.92039
81.4324	28.4433	-1.93964
81.4349	28.4727	-1.96002
81.4375	28.4851	-1.96866
81.44	28.4766	-1.96288
81.4426	28.4524	-1.94626
81.4451	28.4248	-1.92727
81.4476	28.4249	-1.92742
81.4502	28.4653	-1.9554
81.4527	28.5407	-2.00768
81.4553	28.6314	-2.07047
81.4578	28.6652	-2.09394
81.4603	28.6041	-2.05171
81.4629	28.5038	-1.98248
81.4654	28.3742	-1.89295
81.468	28.2379	-1.79877
81.4705	28.0953	-1.70025
81.473	28.0002	-1.63457
81.4756	27.9916	-1.62877
81.4781	28.0817	-1.69115
81.4807	28.3024	-1.84379
81.4832	28.5547	-2.01839
81.4857	28.4193	-1.92483
81.4883	28.3667	-1.88854
81.4908	28.3728	-1.89282
81.4934	28.4376	-1.93771
81.4959	28.523	-1.99687
81.4984	28.5923	-2.04486
81.501	28.5744	-2.03263
81.5035	28.5401	-2.00896
81.5061	28.4702	-1.96073
81.5086	28.3938	-1.90797
81.5111	28.3343	-1.86689
81.5137	28.3228	-1.85903
81.5162	28.324	-1.85996
81.5188	28.3532	-1.88024
81.5213	28.387	-1.9037
81.5238	28.4334	-1.93588
81.5264	28.4703	-1.96145
81.5289	28.354	-1.88114
81.5315	28.2488	-1.80848
81.534	28.0813	-1.69271
81.5365	27.8494	-1.53249
81.5391	27.5986	-1.35918
81.5416	27.3907	-1.21546
81.5442	27.2209	-1.09814
81.5467	27.1385	-1.04127
81.5492	27.1671	-1.0611
81.5518	27.2844	-1.14229
81.5543	27.4318	-1.2443
81.5569	27.5961	-1.35805
81.5594	27.4907	-1.28522
81.5619	27.4369	-1.24813
81.5645	27.4779	-1.27655
81.567	27.6114	-1.36894
81.5696	27.8103	-1.5066
81.5721	27.8892	-1.5612
81.5746	27.8214	-1.5144
81.5772	27.7432	-1.46042
81.5797	27.6312	-1.38303
81.5823	27.5064	-1.29687
81.5848	27.3887	-1.21555
81.5873	27.3076	-1.15959
81.5899	27.2519	-1.12111
81.5924	27.256	-1.12405
81.595	27.3119	-1.16279
81.5975	27.4114	-1.2317
81.6	27.5367	-1.31837
81.6026	27.6596	-1.4035
81.6051	27.6493	-1.39647
81.6077	27.5672	-1.33974
81.6102	27.4897	-1.28623
81.6127	27.4254	-1.24188
81.6153	27.3903	-1.21772
81.6178	27.3726	-1.2055
81.6204	27.3361	-1.1804
81.6229	27.283	-1.14376
81.6254	27.2178	-1.09876
81.628	27.1443	-1.04801
81.6305	27.0847	-1.0069
81.6331	27.0568	-0.987705
81.6356	27.0489	-0.982278
81.6381	27.0451	-0.979777
81.6407	27.028	-0.968041
81.6432	27.0016	-0.949836
81.6458	27.0039	-0.951515
81.6483	27.1103	-1.02518
81.6508	27.0234	-0.965223
81.6534	26.6981	-0.74032
81.6559	26.4116	-0.542305
81.6585	26.2326	-0.418669
81.661	26.2183	-0.408858
81.6635	26.3283	-0.484977
81.6661	26.4757	-0.586961
81.6686	26.5719	-0.65362
81.6712	26.5967	-0.670801
81.6737	26.5946	-0.669455
81.6762	26.5175	-0.616213
81.6788	26.4576	-0.574903
81.6813	26.4278	-0.554402
81.6839	26.4598	-0.576631
81.6864	26.5241	-0.621129
81.6889	26.5884	-0.665703
81.6915	26.6466	-0.706042
81.694	26.6762	-0.726567
81.6966	26.6624	-0.717126
81.6991	26.6182	-0.686627
81.7016	26.5765	-0.657919
81.7042	26.5408	-0.633308
81.7067	26.4805	-0.591711
81.7093	26.3684	-0.514264
81.7118	26.1773	-0.382202
81.7143	25.9816	-0.246972
81.7169	25.8021	-0.122941
81.7194	25.7033	-0.0547226
81.722	25.6905	-0.0459737
81.7245	25.707	-0.0574124
81.727	25.6898	-0.0456176
81.7296	25.6301	-0.00441105
81.7321	25.5267	0.0670093
81.7347	25.4785	0.100202
81.7372	25.5305	0.064202
81.7397	25.5874	0.0247311
81.7423	25.5196	0.0715109
81.7448	25.436	0.129254
81.7474	25.2988	0.224056
81.7499	25.146	0.329587
81.7524	25.042	0.401436
81.755	24.9727	0.449274
81.7575	24.9468	0.467105
81.7601	24.9946	0.433985
81.7626	25.096	0.363744
81.7651	25.1795	0.305956
81.7677	25.2244	0.274779
81.7702	25.2287	0.271749
81.7728	25.1924	0.296754
81.7753	25.1223	0.345142
81.7778	25.074	0.378476
81.7804	25.0552	0.391346
81.7829	25.0331	0.406591
81.7855	24.9815	0.442128
81.788	24.8188	0.554594
81.7905	24.7299	0.615988
81.7931	24.7425	0.607146
81.7956	24.8106	0.559993
81.7982	24.903	0.495978
81.8007	24.9936	0.433274
81.8032	25.021	0.414215
81.8058	24.9863	0.438155
81.8083	24.9719	0.448014
81.8109	24.9642	0.453237
81.8134	24.9539	0.460281
81.8159	24.9514	0.461911
81.8185	24.9531	0.460647
81.821	24.9391	0.47025
81.8236	24.9075	0.492006
81.8261	24.864	0.522055
81.8286	24.8076	0.560963
81.8312	24.7534	0.598318
81.8337	24.7266	0.616744
81.8363	24.7325	0.612638
81.8388	24.7413	0.606475
81.8413	24.7482	0.601571
81.8439	24.7451	0.603647
81.8464	24.7299	0.614052
81.849	24.6969	0.63679
81.8515	24.6664	0.657816
81.854	24.6558	0.66504
81.8566	24.6419	0.674556
81.8591	24.6474	0.670689
81.8617	24.6693	0.655437
81.8642	24.7116	0.626145
81.8667	24.7573	0.594404
81.8693	24.8185	0.551991
81.8718	24.8631	0.521074
81.8744	24.9014	0.494565
81.8769	24.878	0.510633
81.8794	24.8334	0.541346
81.882	24.7929	0.569283
81.8845	24.7644	0.588926
81.8871	24.7607	0.591404
81.8896	24.8121	0.555736
81.8921	24.9065	0.490404
81.8947	25.0168	0.41406
81.8972	25.0005	0.425233
81.8998	25.0026	0.423713
81.9023	25.0419	0.396426
81.9048	25.105	0.352689
81.9074	25.1733	0.305429
81.9099	25.2095	0.280306
81.9125	25.1822	0.299081
81.915	25.1133	0.346618
81.9175	25.005	0.421461
81.9201	24.8842	0.504903
81.9226	24.7789	0.577595
81.9252	24.7387	0.605325
81.9277	24.7681	0.584911
81.9302	24.8353	0.538366
81.9328	24.9121	0.485173
81.9353	24.9636	0.44943
81.9379	24.9773	0.439868
81.9404	24.9469	0.460832
81.9429	24.9032	0.490951
81.9455	24.8548	0.524337
81.948	24.8034	0.559794
81.9506	24.7581	0.591071
81.9531	24.722	0.615893
81.9556	24.7081	0.625433
81.9582	24.7223	0.615547
81.9607	24.7684	0.583558
81.9633	24.8331	0.538766
81.9658	24.8979	0.493874
81.9683	24.946	0.460516
81.9709	24.9688	0.444621
81.9734	24.9442	0.461574
81.976	24.888	0.500367
81.9785	24.8373	0.535326
81.981	24.8028	0.559118
81.9836	24.7825	0.573032
81.9861	24.7892	0.568308
81.9887	24.8154	0.550152
81.9912	24.8384	0.534128
81.9937	24.8931	0.49622
81.9963	24.9541	0.453946
81.9988	25.0193	0.408805
82.0014	24.9722	0.441243
82.0039	24.9268	0.472607
82.0064	24.9826	0.433917
82.009	25.081	0.365802
82.0115	25.0259	0.403776
82.0141	24.9692	0.442887
82.0166	24.9584	0.450326
82.0191	25	0.421421
82.0217	25.0505	0.386448
82.0242	24.986	0.430942
82.0268	24.8509	0.5243
82.0293	24.7631	0.584878
82.0318	24.7289	0.608497
82.0344	24.7174	0.61634
82.0369	24.6989	0.629075
82.0395	24.6558	0.658775
82.042	24.5908	0.703643
82.0445	24.5357	0.741631
82.0471	24.5033	0.763933
82.0496	24.5085	0.760245
82.0522	24.5437	0.735831
82.0547	24.5997	0.697031
82.0572	24.7119	0.61937
82.0598	24.8743	0.50696
82.0623	25.0407	0.391835
82.0649	25.17	0.302353
82.0674	25.253	0.244897
82.0699	25.2827	0.224248
82.0725	25.2539	0.244081
82.075	25.1907	0.287698
82.0776	25.1174	0.338281
82.0801	25.0648	0.374602
82.0826	25.0612	0.376993
82.0852	25.1049	0.346694
82.0877	25.1732	0.299389
82.0903	25.2354	0.256243
82.0928	25.2506	0.245641
82.0953	25.1925	0.285738
82.0979	25.0874	0.358323
82.1004	24.9614	0.44535
82.103	24.8638	0.512756
82.1055	24.8377	0.530733
82.108	24.8606	0.514806
82.1106	24.8371	0.530996
82.1131	24.8031	0.554428
82.1157	24.7353	0.601228
82.1182	24.6872	0.634376
82.1207	24.7368	0.600001
82.1233	24.8225	0.540619
82.1258	24.8997	0.487222
82.1284	24.984	0.428808
82.1309	24.9786	0.432458
82.1334	24.8226	0.540229
82.136	24.68	0.638793
82.1385	24.5621	0.720226
82.1411	24.5196	0.74949
82.1436	24.5595	0.721837
82.1461	24.6254	0.676156
82.1487	24.6966	0.626843
82.1512	24.7549	0.586445
82.1538	24.4726	0.78158
82.1563	24.2443	0.939317
82.1588	24.0796	1.05318
82.1614	24.0121	1.09974
82.1639	23.9666	1.13112
82.1665	23.9853	1.11812
82.169	24.1227	1.02298
82.1715	24.3517	0.864572
82.1741	24.671	0.643704
82.1766	24.9181	0.472764
82.1792	24.9542	0.447686
82.1817	25.0435	0.385874
82.1842	25.1369	0.321199
82.1868	25.2232	0.261437
82.1893	25.2995	0.208607
82.1919	25.3684	0.160821
82.1944	25.4148	0.12868
82.1969	25.4928	0.0746463
82.1995	25.6007	-2.38708e-05
82.202	25.6471	-0.0322135
82.2046	25.1243	0.329213
82.2071	24.6147	0.68153
82.2096	24.2625	0.924947
82.2122	24.1046	1.03402
82.2147	24.113	1.02816
82.2173	24.2474	0.93512
82.2198	24.6279	0.671965
82.2223	24.986	0.42423
82.2249	25.3194	0.193633
82.2274	25.5959	0.00231533
82.23	25.5455	0.0371258
82.2325	25.5409	0.0401734
82.235	25.4286	0.117769
82.2376	25.1653	0.299738
82.2401	24.9106	0.475757
82.2427	24.7403	0.593475
82.2452	24.6088	0.684312
82.2477	24.5643	0.714956
82.2503	24.5765	0.706446
82.2528	24.6521	0.654086
82.2554	24.7135	0.611569
82.2579	24.7621	0.577865
82.2604	24.7752	0.568715
82.263	24.778	0.566684
82.2655	24.7606	0.578645
82.2681	24.7836	0.562639
82.2706	24.8534	0.514269
82.2731	24.9281	0.462566
82.2757	24.9857	0.422642
82.2782	25.0292	0.392485
82.2808	25.0434	0.382592
82.2833	25.032	0.390397
82.2858	25.0622	0.369389
82.2884	25.1619	0.300395
82.2909	25.402	0.134254
82.2935	25.6886	-0.0640029
82.296	25.9671	-0.256642
82.2985	26.1807	-0.404438
82.3011	26.3339	-0.510467
82.3036	26.3589	-0.527817
82.3062	26.3656	-0.532552
82.3087	26.4141	-0.566153
82.3112	26.3523	-0.523553
82.3138	26.2927	-0.482408
82.3163	26.2562	-0.457268
82.3189	26.2644	-0.463019
82.3214	26.3028	-0.489643
82.3239	26.3442	-0.518368
82.3265	26.399	-0.556363
82.329	26.4575	-0.596885
82.3316	26.511	-0.633932
82.3341	26.5354	-0.650882
82.3366	26.383	-0.545593
82.3392	26.2558	-0.457781
82.3417	26.1357	-0.374807
82.3443	26.0215	-0.29588
82.3468	25.9343	-0.235669
82.3493	25.8894	-0.20472
82.3519	25.8805	-0.198682
82.3544	25.8881	-0.204015
82.357	25.907	-0.217186
82.3595	25.9375	-0.238326
82.362	25.9847	-0.271089
82.3646	26.043	-0.311462
82.3671	26.1222	-0.366277
82.3697	26.2352	-0.444536
82.3722	26.3572	-0.529008
82.3747	26.476	-0.611184
82.3773	26.5847	-0.686456
82.3798	26.496	-0.625186
82.3824	26.5577	-0.667945
82.3849	26.6467	-0.729577
82.3874	26.732	-0.788624
82.39	26.7932	-0.831078
82.3925	26.8389	-0.862763
82.3951	26.8652	-0.881023
82.3976	26.8815	-0.892386
82.4001	26.8917	-0.899551
82.4027	26.9212	-0.919976
82.4052	26.9235	-0.921706
82.4078	26.8807	-0.892144
82.4103	26.805	-0.839926
82.4128	26.7033	-0.769646
82.4154	26.5894	-0.691024
82.4179	26.4954	-0.626097
82.4205	26.4586	-0.600704
82.423	26.5132	-0.638543
82.4255	26.6032	-0.700867
82.4281	26.7057	-0.771859
82.4306	26.8274	-0.856116
82.4332	26.952	-0.942341
82.4357	26.9585	-0.946941
82.4382	26.9176	-0.918731
82.4408	26.6877	-0.759822
82.4433	26.5126	-0.638816
82.4459	26.4236	-0.577363
82.4484	26.4307	-0.582413
82.4509	26.5656	-0.675735
82.4535	26.7224	-0.784239
82.456	26.8454	-0.869389
82.4586	26.8839	-0.896126
82.4611	26.8527	-0.874637
82.4636	26.8386	-0.864944
82.4662	26.8825	-0.895416
82.4687	26.9016	-0.908694
82.4713	26.9246	-0.924685
82.4738	26.94	-0.935419
82.4763	26.9066	-0.912408
82.4789	26.8583	-0.879092
82.4814	26.8361	-0.863791
82.484	26.7945	-0.835135
82.4865	26.7499	-0.804428
82.489	26.7096	-0.776591
82.4916	26.6663	-0.746746
82.4941	26.6849	-0.759719
82.4967	26.7595	-0.81137
82.4992	26.8331	-0.862354
82.5017	26.8981	-0.907371
82.5043	26.9412	-0.937268
82.5068	26.9559	-0.947517
82.5094	26.9857	-0.968198
82.5119	27.0571	-1.01766
82.5144	27.1522	-1.08354
82.517	27.2241	-1.13329
82.5195	27.2668	-1.16293
82.5221	27.2537	-1.15396
82.5246	27.1579	-1.08783
82.5271	27.0268	-0.997258
82.5297	26.876	-0.893031
82.5322	26.7083	-0.777204
82.5348	26.5519	-0.669084
82.5373	26.4332	-0.587098
82.5398	26.3244	-0.512013
82.5424	26.2347	-0.450014
82.5449	26.1641	-0.401336
82.5475	26.1151	-0.367501
82.55	26.1168	-0.368782
82.5525	26.1971	-0.424385
82.5551	26.401	-0.565436
82.5576	26.6596	-0.744349
82.5602	26.9499	-0.945213
82.5627	27.1982	-1.11697
82.5652	27.1361	-1.07413
82.5678	27.0929	-1.04433
82.5703	27.0516	-1.01588
82.5729	27.0156	-0.991031
82.5754	26.9978	-0.978801
82.5779	26.9962	-0.977793
82.5805	27.0496	-1.01483
82.583	27.1119	-1.05797
82.5856	26.9716	-0.961037
82.5881	26.8732	-0.893067
82.5906	26.8156	-0.853357
82.5932	26.8512	-0.878034
82.5957	26.6978	-0.772061
82.5983	26.5142	-0.645209
82.6008	26.4478	-0.599366
82.6033	26.486	-0.625906
82.6059	26.5468	-0.668022
82.6084	26.5765	-0.688623
82.611	26.6015	-0.70597
82.6135	26.6438	-0.735332
82.616	26.7618	-0.817003
82.6186	26.9681	-0.959741
82.6211	27.0282	-1.00136
82.6237	27.0069	-0.986736
82.6262	27.0311	-1.0036
82.6287	27.1016	-1.05243
82.6313	27.203	-1.12258
82.6338	27.3125	-1.19839
82.6364	27.4175	-1.27112
82.6389	27.3103	-1.19704
82.6414	27.2471	-1.15342
82.644	27.2306	-1.14211
82.6465	27.2154	-1.13171
82.6491	27.1935	-1.11664
82.6516	27.1583	-1.09241
82.6541	27.1112	-1.05988
82.6567	27.0801	-1.0385
82.6592	27.0853	-1.04219
82.6618	27.1185	-1.0652
82.6643	27.1715	-1.10191
82.6668	26.9789	-0.968842
82.6694	26.7909	-0.83892
82.6719	26.6589	-0.747765
82.6745	26.5883	-0.699049
82.677	26.6006	-0.707591
82.6795	26.7249	-0.79366
82.6821	26.9059	-0.918856
82.6846	27.1001	-1.05326
82.6872	27.2698	-1.17071
82.6897	27.342	-1.22068
82.6922	27.3309	-1.2131
82.6948	27.2636	-1.16667
82.6973	27.1369	-1.07915
82.6999	26.9961	-0.981857
82.7024	26.8784	-0.90057
82.7049	26.8052	-0.850011
82.7075	26.7671	-0.823802
82.71	26.7494	-0.811634
82.7126	26.7492	-0.811591
82.7151	26.7642	-0.822006
82.7176	26.8018	-0.84809
82.7202	26.8807	-0.902763
82.7227	26.9982	-0.984068
82.7253	27.1396	-1.08197
82.7278	27.3106	-1.20028
82.7303	27.4837	-1.32007
82.7329	27.5835	-1.38914
82.7354	27.5708	-1.38048
82.738	27.5753	-1.38366
82.7405	27.6504	-1.4357
82.743	27.6769	-1.45406
82.7456	27.5301	-1.35264
82.7481	27.3547	-1.23146
82.7507	27.2142	-1.13437
82.7532	27.1481	-1.08875
82.7557	27.1351	-1.07986
82.7583	27.1669	-1.10191
82.7608	27.1777	-1.10951
82.7634	26.9336	-0.94082
82.7659	26.7903	-0.841775
82.7684	26.7871	-0.839633
82.771	26.9408	-0.946063
82.7735	27.1542	-1.09366
82.7761	27.3593	-1.23562
82.7786	27.5244	-1.34981
82.7811	27.6313	-1.42383
82.7837	27.729	-1.49147
82.7862	27.7703	-1.52013
82.7888	27.706	-1.47573
82.7913	27.6615	-1.44509
82.7938	27.6872	-1.46292
82.7964	27.8114	-1.54891
82.7989	28.0352	-1.70371
82.8015	28.3373	-1.91267
82.804	28.6484	-2.12792
82.8065	28.4906	-2.01887
82.8091	28.1783	-1.80306
82.8116	27.9474	-1.64345
82.8142	27.9326	-1.63328
82.8167	28.0099	-1.68681
82.8192	28.1212	-1.76389
82.8218	28.2224	-1.83398
82.8243	28.2696	-1.8667
82.8269	28.2561	-1.85745
82.8294	28.2398	-1.84621
82.8319	28.2375	-1.84472
82.8345	28.2645	-1.86351
82.837	28.3666	-1.93415
82.8396	28.5167	-2.03807
82.8421	28.6598	-2.13709
82.8446	28.7812	-2.22111
82.8472	28.8723	-2.28421
82.8497	28.9144	-2.31337
82.8523	28.9325	-2.326
82.8548	28.9312	-2.3252
82.8573	28.9064	-2.30811
82.8599	28.8374	-2.26048
82.8624	28.7195	-2.17904
82.865	28.5523	-2.06349
82.8675	28.3494	-1.92334
82.87	28.1302	-1.77182
82.8726	27.9456	-1.64429
82.8751	27.8133	-1.55284
82.8777	27.7657	-1.52004
82.8802	27.8033	-1.54611
82.8827	27.9245	-1.63003
82.8853	28.1022	-1.75298
82.8878	28.3432	-1.91968
82.8904	28.6572	-2.13695
82.8929	28.9122	-2.31332
82.8954	29.0089	-2.38025
82.898	29.0831	-2.43164
82.9005	29.1253	-2.46096
82.9031	29.1179	-2.45594
82.9056	29.0807	-2.43026
82.9081	29.0479	-2.40766
82.9107	29.058	-2.41472
82.9132	29.1205	-2.45808
82.9158	29.2112	-2.52086
82.9183	29.2077	-2.51854
82.9208	29.0167	-2.38651
82.9234	28.7399	-2.19522
82.9259	28.4213	-1.97499
82.9285	28.1215	-1.76779
82.931	27.9309	-1.63605
82.9335	27.8558	-1.58424
82.9361	27.8431	-1.57552
82.9386	27.8671	-1.5922
82.9412	27.8852	-1.60481
82.9437	27.9006	-1.61558
82.9462	27.9229	-1.63107
82.9488	27.9497	-1.64967
82.9513	27.9681	-1.66251
82.9539	27.9855	-1.67461
82.9564	28.0023	-1.68629
82.9589	28.0284	-1.70442
82.9615	28.0545	-1.72258
82.964	28.0774	-1.73853
82.9666	27.9709	-1.66493
82.9691	27.8139	-1.55644
82.9716	27.6895	-1.47054
82.9742	27.6027	-1.4106
82.9767	27.5692	-1.38751
82.9793	27.5818	-1.39635
82.9818	27.637	-1.43459
82.9843	27.6003	-1.40929
82.9869	27.4712	-1.32011
82.9894	27.3627	-1.24517
82.992	27.278	-1.18669
82.9945	27.2398	-1.16038
82.997	27.246	-1.1647
82.9996	27.2938	-1.19788
83.0021	27.3661	-1.24796
83.0047	27.4511	-1.30685
83.0072	27.5303	-1.36167
83.0097	27.6175	-1.42203
83.0123	27.7192	-1.49244
83.0148	27.8007	-1.54886
83.0174	27.8569	-1.58781
83.0199	27.9065	-1.62222
83.0224	27.9369	-1.64331
83.025	27.9307	-1.63912
83.0275	27.9044	-1.62105
83.0301	27.8457	-1.5805
83.0326	27.7136	-1.48923
83.0351	27.5314	-1.36337
83.0377	27.3736	-1.25437
83.0402	27.3449	-1.23456
83.0428	27.4506	-1.30776
83.0453	27.6665	-1.45714
83.0478	27.9169	-1.63036
83.0504	28.1245	-1.77403
83.0529	28.2039	-1.82898
83.0555	28.1792	-1.81199
83.058	28.0843	-1.74646
83.0605	27.9736	-1.67002
83.0631	27.8753	-1.60212
83.0656	27.8085	-1.55603
83.0682	27.835	-1.57443
83.0707	27.9307	-1.64066
83.0732	28.0705	-1.73744
83.0758	28.1941	-1.823
83.0783	28.2894	-1.88894
83.0809	28.2971	-1.89438
83.0834	28.2838	-1.88527
83.0859	28.2941	-1.89249
83.0885	28.3384	-1.92321
83.091	28.4098	-1.97268
83.0936	28.5008	-2.03563
83.0961	28.5795	-2.09016
83.0986	28.6162	-2.11559
83.1012	28.6301	-2.12529
83.1037	28.6062	-2.1089
83.1063	28.508	-2.04108
83.1088	28.2964	-1.89485
83.1113	28.0161	-1.7011
83.1139	27.7475	-1.51548
83.1164	27.5349	-1.36852
83.119	27.4081	-1.28094
83.1215	27.3876	-1.26685
83.124	27.4655	-1.32079
83.1266	27.5815	-1.4011
83.1291	27.6856	-1.47315
83.1317	27.7912	-1.54629
83.1342	27.8965	-1.61915
83.1367	27.9602	-1.66332
83.1393	27.9632	-1.66549
83.1418	27.941	-1.65022
83.1444	27.9042	-1.62488
83.1469	27.8673	-1.59941
83.1494	27.8288	-1.57288
83.152	27.8732	-1.60368
83.1545	27.9443	-1.65291
83.1571	28.0028	-1.69348
83.1596	28.0132	-1.70076
83.1621	27.9989	-1.69093
83.1647	27.8652	-1.59859
83.1672	27.7077	-1.48975
83.1698	27.5724	-1.39625
83.1723	27.5673	-1.39285
83.1748	27.679	-1.47013
83.1774	27.8656	-1.59929
83.1799	28.0688	-1.73988
83.1825	28.2365	-1.85591
83.185	28.2621	-1.87373
83.1875	28.257	-1.87027
83.1901	28.2247	-1.84804
83.1926	28.1815	-1.8182
83.1952	28.1287	-1.78181
83.1977	28.0286	-1.7127
83.2002	27.8644	-1.59923
83.2028	27.711	-1.49324
83.2053	27.6182	-1.42915
83.2079	27.5874	-1.40797
83.2104	27.6499	-1.45127
83.2129	27.7825	-1.54305
83.2155	27.9167	-1.63591
83.218	28.0064	-1.69798
83.2206	28.001	-1.69438
83.2231	27.9852	-1.68352
83.2256	27.9709	-1.67376
83.2282	27.9248	-1.64191
83.2307	27.8497	-1.59008
83.2333	27.7452	-1.5179
83.2358	27.6375	-1.44353
83.2383	27.5702	-1.39709
83.2409	27.5895	-1.41053
83.2434	27.654	-1.45518
83.246	27.7327	-1.5097
83.2485	27.8331	-1.57919
83.251	27.9413	-1.65409
83.2536	28.0424	-1.72409
83.2561	28.1659	-1.80962
83.2587	28.348	-1.93556
83.2612	28.5404	-2.06871
83.2637	28.698	-2.17779
83.2663	28.7936	-2.24395
83.2688	28.8682	-2.29564
83.2714	28.9153	-2.32829
83.2739	28.9549	-2.35579
83.2764	28.9801	-2.3733
83.279	28.8841	-2.307
83.2815	28.7648	-2.22455
83.2841	28.6359	-2.13552
83.2866	28.5226	-2.05725
83.2891	28.4144	-1.98257
83.2917	28.3174	-1.91555
83.2942	28.2178	-1.84678
83.2968	28.0591	-1.73712
83.2993	27.8579	-1.59811
83.3018	27.6679	-1.46681
83.3044	27.5611	-1.39299
83.3069	27.5003	-1.35109
83.3095	27.5562	-1.38979
83.312	27.736	-1.51426
83.3145	27.9263	-1.64592
83.3171	28.0373	-1.72273
83.3196	28.08	-1.75237
83.3222	28.0354	-1.72156
83.3247	27.8735	-1.60974
83.3272	27.7125	-1.49847
83.3298	27.5964	-1.41827
83.3323	27.5633	-1.39553
83.3349	27.6493	-1.45503
83.3374	27.8778	-1.61317
83.3399	28.1718	-1.81654
83.3425	28.121	-1.78146
83.345	28.0901	-1.76017
83.3476	28.0733	-1.74863
83.3501	28.0802	-1.75355
83.3526	28.0977	-1.76572
83.3552	28.1024	-1.76906
83.3577	28.1035	-1.76989
83.3603	28.1214	-1.78236
83.3628	28.0781	-1.75246
83.3653	27.9925	-1.69339
83.3679	27.9802	-1.68498
83.3704	28.0787	-1.75317
83.373	28.2679	-1.88407
83.3755	28.4454	-2.00692
83.378	28.5845	-2.10318
83.3806	28.7594	-2.22418
83.3831	28.9238	-2.33794
83.3857	29.0602	-2.43235
83.3882	29.1532	-2.49674
83.3907	29.0992	-2.45948
83.3933	28.9864	-2.38157
83.3958	28.7519	-2.21951
83.3984	28.4626	-2.01957
83.4009	28.1609	-1.81106
83.4034	27.8788	-1.61606
83.406	27.6589	-1.4641
83.4085	27.5661	-1.40001
83.4111	27.5535	-1.39139
83.4136	27.589	-1.41605
83.4161	27.6512	-1.45911
83.4187	27.7111	-1.50066
83.4212	27.777	-1.54627
83.4238	27.8347	-1.58628
83.4263	27.9288	-1.65139
83.4288	28.054	-1.73805
83.4314	28.1953	-1.83586
83.4339	28.3324	-1.93075
83.4365	28.4564	-2.01659
83.439	28.5092	-2.05319
83.4415	28.4974	-2.04512
83.4441	28.4437	-2.00807
83.4466	28.3818	-1.96534
83.4492	28.3373	-1.93466
83.4517	28.3336	-1.93219
83.4542	28.3853	-1.96799
83.4568	28.4343	-2.00197
83.4593	28.466	-2.02402
83.4619	28.4602	-2.02009
83.4644	28.4199	-1.9923
83.4669	28.3547	-1.94732
83.4695	28.3051	-1.91305
83.472	28.2847	-1.89905
83.4746	28.3459	-1.94146
83.4771	28.4333	-2.00201
83.4796	28.3805	-1.96553
83.4822	28.2972	-1.90802
83.4847	28.2168	-1.85252
83.4873	28.1447	-1.80275
83.4898	28.0813	-1.75902
83.4923	28.0404	-1.7308
83.4949	28.0633	-1.74675
83.4974	28.1057	-1.77613
83.5	28.1636	-1.81627
83.5025	28.246	-1.87333
83.505	28.3445	-1.94152
83.5076	28.4587	-2.02058
83.5101	28.5683	-2.09647
83.5127	28.6411	-2.1469
83.5152	28.6311	-2.14006
83.5177	28.5705	-2.0982
83.5203	28.4673	-2.02698
83.5228	28.3676	-1.95808
83.5254	28.3125	-1.92009
83.5279	28.3207	-1.92587
83.5304	28.3606	-1.95353
83.533	28.4105	-1.98809
83.5355	28.4447	-2.01183
83.5381	28.4443	-2.01164
83.5406	28.4223	-1.99655
83.5431	28.3832	-1.9696
83.5457	28.379	-1.96675
83.5482	28.4079	-1.9868
83.5508	28.4626	-2.02476
83.5533	28.5121	-2.05903
83.5558	28.5582	-2.091
83.5584	28.5639	-2.09506
83.5609	28.5306	-2.07211
83.5635	28.483	-2.03929
83.566	28.4576	-2.02179
83.5685	28.4695	-2.03009
83.5711	28.5319	-2.07333
83.5736	28.6407	-2.14866
83.5762	28.7731	-2.24033
83.5787	28.8785	-2.31325
83.5812	28.9291	-2.34832
83.5838	28.9239	-2.3448
83.5863	28.8968	-2.32615
83.5889	28.8751	-2.31125
83.5914	28.8862	-2.31901
83.5939	28.909	-2.33488
83.5965	28.921	-2.34323
83.599	28.8316	-2.28154
83.6016	28.8505	-2.29469
83.6041	28.7736	-2.24159
83.6066	28.7061	-2.19498
83.6092	28.4925	-2.04741
83.6117	28.1591	-1.81691
83.6143	27.7537	-1.53667
83.6168	27.4807	-1.348
83.6193	27.3073	-1.2282
83.6219	27.1611	-1.12723
83.6244	27.0168	-1.0275
83.627	26.8766	-0.930673
83.6295	26.768	-0.855671
83.632	26.7174	-0.820747
83.6346	26.6925	-0.80361
83.6371	26.7149	-0.819163
83.6397	26.7836	-0.866762
83.6422	26.8637	-0.922248
83.6447	26.93	-0.968149
83.6473	26.9947	-1.013
83.6498	27.0646	-1.0614
83.6524	27.0298	-1.03744
83.6549	27.0601	-1.05847
83.6574	27.1553	-1.1244
83.66	27.2974	-1.22274
83.6625	27.4171	-1.3056
83.6651	27.4946	-1.35927
83.6676	27.5012	-1.36393
83.6701	27.4501	-1.32865
83.6727	27.3644	-1.26949
83.6752	27.27	-1.20432
83.6778	27.1763	-1.13959
83.6803	27.0872	-1.07806
83.6828	27.0056	-1.02175
83.6854	26.8995	-0.948459
83.6879	26.7664	-0.856481
83.6905	26.637	-0.767093
83.693	26.5146	-0.68259
83.6955	26.396	-0.600632
83.6981	26.3127	-0.543155
83.7006	26.2723	-0.515297
83.7032	26.2485	-0.498908
83.7057	26.2294	-0.485765
83.7082	26.2171	-0.477399
83.7108	26.2068	-0.470372
83.7133	26.1943	-0.4618
83.7159	26.1846	-0.455174
83.7184	26.1917	-0.460154
83.7209	26.2082	-0.471641
83.7235	26.24	-0.493732
83.726	26.29	-0.528411
83.7286	26.3396	-0.562789
83.7311	26.3816	-0.591915
83.7336	26.4133	-0.613899
83.7362	26.4198	-0.618502
83.7387	26.3864	-0.595437
83.7413	26.3032	-0.538043
83.7438	26.1524	-0.433812
83.7463	25.9252	-0.27685
83.7489	25.6396	-0.0793986
83.7514	25.3288	0.135426
83.754	25.0099	0.355848
83.7565	24.7086	0.564048
83.759	24.4876	0.716806
83.7616	24.3742	0.795159
83.7641	24.3677	0.799548
83.7667	24.4309	0.755779
83.7692	24.5956	0.641796
83.7717	24.8182	0.487789
83.7743	25.071	0.312856
83.7768	25.2505	0.188652
83.7794	25.3718	0.104744
83.7819	25.3888	0.0929043
83.7844	25.3287	0.134356
83.787	25.2008	0.222666
83.7895	25.0926	0.297419
83.7921	25.0474	0.328592
83.7946	25.0936	0.296548
83.7971	25.0692	0.313363
83.7997	25.0119	0.35291
83.8022	24.9784	0.375969
83.8048	24.9749	0.378307
83.8073	25.0013	0.359968
83.8098	25.0353	0.336352
83.8124	24.9698	0.381604
83.8149	24.8983	0.430904
83.8175	24.8731	0.448276
83.82	24.8447	0.467836
83.8225	24.7872	0.507483
83.8251	24.7239	0.551165
83.8276	24.6545	0.599062
83.8302	24.5997	0.636852
83.8327	24.5757	0.653377
83.8352	24.6124	0.627894
83.8378	24.73	0.546531
83.8403	24.9479	0.395774
83.8429	25.304	0.149447
83.8454	25.7505	-0.159366
83.8479	25.9155	-0.273551
83.8505	26.1023	-0.402833
83.853	26.2934	-0.535037
83.8556	25.7344	-0.1486
83.8581	25.263	0.177247
83.8606	25.0584	0.318686
83.8632	25.1026	0.288035
83.8657	25.2666	0.174542
83.8683	25.3915	0.0880822
83.8708	25.47	0.0336963
83.8733	25.4209	0.0675904
83.8759	25.2569	0.180904
83.8784	25.0326	0.335888
83.881	24.871	0.447535
83.8835	24.8172	0.484693
83.886	24.9868	0.367328
83.8886	25.1862	0.229374
83.8911	24.9273	0.408291
83.8937	24.762	0.522496
83.8962	24.7008	0.564722
83.8987	24.7396	0.537808
83.9013	24.8192	0.482679
83.9038	24.8837	0.438029
83.9064	24.9147	0.416505
83.9089	24.91	0.41965
83.9114	24.9167	0.414932
83.914	24.9513	0.39094
83.9165	25.0123	0.348662
83.9191	25.0966	0.290283
83.9216	25.2321	0.196476
83.9241	25.3379	0.123247
83.9267	25.4049	0.0768447
83.9292	25.41	0.0732542
83.9318	25.3532	0.112421
83.9343	25.2171	0.206445
83.9368	25.0744	0.304992
83.9394	24.9357	0.400873
83.9419	24.8384	0.46802
83.9445	24.7745	0.512117
83.947	24.7664	0.517627
83.9495	24.8326	0.471801
83.9521	24.954	0.387789
83.9546	25.042	0.326813
83.9572	25.0735	0.304979
83.9597	25.025	0.33843
83.9622	24.9268	0.406234
83.9648	24.863	0.450283
83.9673	24.8276	0.474662
83.9699	24.7605	0.520944
83.9724	24.7072	0.557729
83.9749	24.6423	0.602555
83.9775	24.5652	0.655731
83.98	24.5168	0.6891
83.9826	24.5083	0.694937
83.9851	24.4861	0.710183
83.9876	24.4529	0.733048
83.9902	24.432	0.747412
83.9927	24.4297	0.748952
83.9953	24.428	0.750012
83.9978	24.4435	0.739188
84.0003	24.4771	0.71587
84.0029	24.5169	0.688261
84.0054	24.5418	0.670987
84.008	24.5705	0.651074
84.0105	24.6358	0.605781
84.013	24.721	0.546838
84.0156	24.8109	0.484553
84.0181	24.9151	0.412423
84.0207	25.0267	0.335153
84.0232	25.121	0.269891
84.0257	25.2072	0.210166
84.0283	25.1	0.284197
84.0308	24.8817	0.435074
84.0334	24.6639	0.585589
84.0359	24.5039	0.696153
84.0384	24.455	0.729868
84.041	24.5129	0.689736
84.0435	24.637	0.603861
84.0461	24.786	0.500764
84.0486	24.9262	0.403742
84.0511	25.0408	0.324401
84.0537	24.9001	0.421596
84.0562	24.752	0.523925
84.0588	24.6528	0.592452
84.0613	24.6218	0.613789
84.0638	24.6429	0.599114
84.0664	24.683	0.571284
84.0689	24.58	0.642387
84.0715	24.5259	0.679749
84.074	24.4554	0.728392
84.0765	24.3712	0.78657
84.0791	24.189	0.912406
84.0816	23.99	1.04997
84.0842	23.7946	1.18496
84.0867	23.7017	1.24915
84.0892	23.7184	1.23748
84.0918	23.8264	1.16272
84.0943	23.9331	1.08885
84.0969	24.0231	1.02657
84.0994	24.0746	0.990864
84.1019	24.0941	0.977254
84.1045	24.1187	0.96019
84.107	24.1612	0.930711
84.1096	24.2557	0.865245
84.1121	24.3734	0.783836
84.1146	24.7166	0.546404
84.1172	25.2177	0.199847
84.1197	25.1138	0.271551
84.1223	25.0512	0.314804
84.1248	25.0261	0.332034
84.1273	25.0291	0.329875
84.1299	25.0545	0.312265
84.1324	25.1338	0.257305
84.135	25.2679	0.164491
84.1375	25.4063	0.0687135
84.14	25.5363	-0.0212832
84.1426	25.6459	-0.0971151
84.1451	25.6946	-0.130881
84.1477	25.6837	-0.123425
84.1502	25.6586	-0.106182
84.1527	25.6304	-0.086781
84.1553	25.5947	-0.0621282
84.1578	25.5092	-0.00310597
84.1604	25.391	0.0785586
84.1629	25.2572	0.170979
84.1654	25.1351	0.255295
84.168	25.0575	0.308844
84.1705	25.0288	0.328619
84.1731	25.0476	0.315524
84.1756	25.1361	0.254286
84.1781	25.2526	0.173596
84.1807	25.3989	0.0723528
84.1832	25.6158	-0.077712
84.1858	25.7449	-0.167021
84.1883	25.424	0.0547532
84.1908	24.9962	0.350473
84.1934	24.5051	0.689994
84.1959	24.0741	0.987947
84.1985	23.7881	1.18561
84.201	23.6379	1.28939
84.2035	23.5971	1.31751
84.2061	23.6469	1.28296
84.2086	23.7269	1.2276
84.2112	23.8365	1.15169
84.2137	23.9708	1.05875
84.2162	24.1298	0.948717
84.2188	24.3058	0.826944
84.2213	24.4178	0.749428
84.2239	24.4562	0.722767
84.2264	24.4406	0.733441
84.2289	24.3862	0.770979
84.2315	24.2941	0.834569
84.234	24.2305	0.87851
84.2366	24.1951	0.902852
84.2391	24.1669	0.922329
84.2416	24.1333	0.945422
84.2442	24.1065	0.963859
84.2467	24.1075	0.963075
84.2493	24.1331	0.94532
84.2518	24.1845	0.909715
84.2543	24.2467	0.866607
84.2569	24.3192	0.816415
84.2594	24.4087	0.754436
84.262	24.5365	0.665951
84.2645	24.6743	0.570609
84.267	24.8529	0.447013
84.2696	24.7791	0.497963
84.2721	24.6912	0.558672
84.2747	24.6715	0.572158
84.2772	24.6924	0.557642
84.2797	24.7559	0.513614
84.2823	24.8487	0.449351
84.2848	24.9552	0.375624
84.2874	25.0654	0.299357
84.2899	25.1756	0.223065
84.2924	25.2434	0.176099
84.295	25.1904	0.212693
84.2975	25.1069	0.270353
84.3001	25.0529	0.307598
84.3026	25.0205	0.329931
84.3051	25.0083	0.338282
84.3077	25.0183	0.331244
84.3102	25.0704	0.295176
84.3128	25.1695	0.226563
84.3153	25.3175	0.124133
84.3178	25.4909	0.00411987
84.3204	25.2932	0.140749
84.3229	24.9526	0.376166
84.3255	24.666	0.574274
84.328	24.4639	0.713929
84.3305	24.4131	0.748971
84.3331	24.4332	0.734991
84.3356	24.4646	0.713174
84.3382	24.5174	0.676555
84.3407	24.5966	0.621706
84.3432	24.6967	0.552405
84.3458	24.8508	0.445761
84.3483	25.0355	0.317969
84.3509	25.1923	0.209499
84.3534	25.3036	0.13244
84.3559	25.3678	0.0879283
84.3585	25.3754	0.0826403
84.361	25.3551	0.0965856
84.3636	25.3474	0.101766
84.3661	25.3671	0.0880529
84.3686	25.2411	0.175128
84.3712	25.1928	0.208417
84.3737	25.2158	0.192463
84.3763	25.2679	0.156336
84.3788	25.3353	0.109618
84.3813	25.4108	0.0573413
84.3839	25.4885	0.00355361
84.3864	25.5929	-0.0687553
84.389	25.7403	-0.170739
84.3915	25.6174	-0.0858553
84.394	25.4951	-0.00137306
84.3966	25.5197	-0.0184368
84.3991	25.7207	-0.157535
84.4017	25.5457	-0.0365947
84.4042	25.3709	0.084169
84.4067	25.2939	0.137328
84.4093	25.2794	0.147252
84.4118	25.31	0.125994
84.4144	25.3934	0.0682929
84.4169	25.4876	0.00304399
84.4194	25.5763	-0.0583465
84.422	25.6974	-0.142165
84.4245	25.8672	-0.259668
84.4271	26.0151	-0.362046
84.4296	26.0756	-0.404006
84.4321	25.8941	-0.278561
84.4347	25.7461	-0.176277
84.4372	25.6546	-0.113133
84.4398	25.6209	-0.0898981
84.4423	25.6181	-0.0880259
84.4448	25.5747	-0.0581492
84.4474	25.4858	0.00323448
84.4499	25.4884	0.00135886
84.4525	25.5523	-0.0429211
84.455	25.6688	-0.123562
84.4575	25.7797	-0.20031
84.4601	25.8017	-0.215583
84.4626	25.7558	-0.183978
84.4652	25.6928	-0.140496
84.4677	25.6118	-0.0845579
84.4702	25.5343	-0.0310675
84.4728	25.4982	-0.00617963
84.4753	25.5165	-0.0189113
84.4779	25.5817	-0.064111
84.4804	25.5356	-0.0322843
84.4829	25.534	-0.0312488
84.4855	25.5764	-0.0606484
84.488	25.6531	-0.113769
84.4906	25.7572	-0.185846
84.4931	25.8336	-0.238773
84.4956	25.8273	-0.234515
84.4982	25.7229	-0.162393
84.5007	25.5563	-0.0472856
84.5033	25.3663	0.0839851
84.5058	25.187	0.207902
84.5083	25.0684	0.289777
84.5109	25.0604	0.295269
84.5134	25.1487	0.234079
84.516	25.283	0.141147
84.5185	25.4818	0.00359825
84.521	25.6074	-0.0833491
84.5236	25.6143	-0.0882014
84.5261	25.6158	-0.0893371
84.5287	25.6141	-0.0882497
84.5312	25.5946	-0.0748438
84.5337	25.5662	-0.0552285
84.5363	25.5352	-0.0339432
84.5388	25.5116	-0.0176608
84.5414	25.4866	-0.000448318
84.5439	25.4653	0.01414
84.5464	25.4407	0.0310724
84.549	25.4126	0.0504215
84.5515	25.3847	0.0696289
84.5541	25.358	0.0880376
84.5566	25.337	0.102467
84.5591	25.3281	0.10855
84.5617	25.3312	0.106284
84.5642	25.349	0.0938979
84.5668	25.3817	0.071178
84.5693	25.4275	0.0394377
84.5718	25.4804	0.00279495
84.5744	25.5367	-0.0362575
84.5769	25.5983	-0.0789092
84.5795	25.6687	-0.127677
84.582	25.7337	-0.172742
84.5845	25.8037	-0.221188
84.5871	25.8747	-0.270364
84.5896	25.9389	-0.314841
84.5922	26.0066	-0.361762
84.5947	26.092	-0.420871
84.5972	26.1486	-0.4601
84.5998	26.1195	-0.440121
84.6023	26.0554	-0.395834
84.6049	25.9762	-0.341158
84.6074	25.825	-0.236741
84.6099	25.504	-0.0148078
84.6125	25.2258	0.177416
84.615	25.0179	0.321123
84.6176	24.8998	0.402677
84.6201	24.8331	0.448761
84.6226	24.8005	0.47117
84.6252	24.7674	0.493984
84.6277	24.7119	0.532262
84.6303	24.6621	0.566602
84.6328	24.6491	0.575527
84.6353	24.6635	0.565478
84.6379	24.7119	0.531937
84.6404	24.8073	0.465879
84.643	24.8723	0.420866
84.6455	24.8868	0.410762
84.648	24.8686	0.423214
84.6506	24.7905	0.477164
84.6531	24.6855	0.549691
84.6557	24.6119	0.60046
84.6582	24.576	0.62522
84.6607	24.583	0.620309
84.6633	24.6581	0.568264
84.6658	24.8333	0.447019
84.6684	25.0918	0.268207
84.6709	25.4019	0.05369
84.6734	25.7587	-0.193118
84.676	25.8008	-0.222331
84.6785	25.856	-0.260544
84.6811	25.9256	-0.308786
84.6836	26.0038	-0.362944
84.6861	26.0622	-0.403403
84.6887	26.0894	-0.422293
84.6912	26.0864	-0.420303
84.6938	26.0222	-0.376026
84.6963	25.9234	-0.30778
84.6988	25.8477	-0.255527
84.7014	25.8326	-0.245139
84.7039	25.8583	-0.262974
84.7065	25.8901	-0.28512
84.709	25.9214	-0.306806
84.7115	25.9336	-0.315313
84.7141	25.9091	-0.298446
84.7166	25.8549	-0.261109
84.7192	25.8165	-0.234603
84.7217	25.7834	-0.211793
84.7242	25.7455	-0.185719
84.7268	25.7438	-0.184597
84.7293	25.8093	-0.229966
84.7319	25.9256	-0.310479
84.7344	26.0512	-0.397441
84.7369	26.1588	-0.471921
84.7395	26.2078	-0.505905
84.742	26.161	-0.473642
84.7446	26.0361	-0.387359
84.7471	25.9005	-0.293659
84.7496	25.7705	-0.203867
84.7522	25.6566	-0.125155
84.7547	25.5889	-0.0784544
84.7573	25.5683	-0.0643051
84.7598	25.5752	-0.0691333
84.7623	25.6054	-0.0900797
84.7649	25.6294	-0.10677
84.7674	25.5201	-0.0313115
84.77	25.4402	0.0238351
84.7725	25.4158	0.04065
84.775	25.4348	0.0274204
84.7776	25.3876	0.0600043
84.7801	25.2293	0.169331
84.7827	25.145	0.227575
84.7852	25.1001	0.258496
84.7877	25.055	0.289638
84.7903	25.0021	0.326129
84.7928	24.9478	0.363543
84.7954	24.8871	0.405462
84.7979	24.8152	0.455094
84.8004	24.7354	0.510175
84.803	24.6506	0.568696
84.8055	24.5291	0.652673
84.8081	24.4199	0.728066
84.8106	24.4117	0.733665
84.8131	24.5219	0.657408
84.8157	24.7559	0.495502
84.8182	25.0614	0.284138
84.8208	25.0482	0.293177
84.8233	25.0329	0.303714
84.8258	25.0196	0.312798
84.8284	25.0191	0.313042
84.8309	24.9995	0.326496
84.8335	24.9721	0.345347
84.836	24.9374	0.369298
84.8385	24.8988	0.395863
84.8411	24.8408	0.435942
84.8436	24.7855	0.474054
84.8462	24.7353	0.508706
84.8487	24.695	0.536501
84.8512	24.6823	0.545164
84.8538	24.7145	0.52281
84.8563	24.7903	0.470333
84.8589	24.8769	0.41037
84.8614	24.9681	0.347196
84.8639	25.0597	0.283765
84.8665	25.1345	0.231976
84.869	25.1676	0.209024
84.8716	25.1813	0.199401
84.8741	25.1792	0.200768
84.8766	25.1572	0.215944
84.8792	25.1189	0.242312
84.8817	24.9324	0.371186
84.8843	24.4606	0.697334
84.8868	24.0146	1.00565
84.8893	23.6604	1.25047
84.8919	23.445	1.39935
84.8944	23.3296	1.47903
84.897	23.2872	1.50832
84.8995	23.3343	1.47564
84.902	23.457	1.39069
84.9046	23.6105	1.28447
84.9071	23.7812	1.16638
84.9097	23.9935	1.01947
84.9122	24.3142	0.797662
84.9147	24.6832	0.542431
84.9173	25.0734	0.272504
84.9198	25.5341	-0.0461557
84.9224	25.7142	-0.170757
84.9249	25.6263	-0.110089
84.9274	25.6002	-0.0920987
84.93	25.6079	-0.0975181
84.9325	25.641	-0.12047
84.9351	25.4795	-0.008906
84.9376	25.1902	0.191073
84.9401	24.9068	0.38693
84.9427	24.6817	0.542471
84.9452	24.5085	0.662136
84.9478	24.4227	0.721376
84.9503	24.5042	0.66495
84.9528	24.6182	0.586051
84.9554	24.7333	0.50641
84.9579	24.8271	0.441403
84.9605	24.8742	0.408767
84.963	24.8435	0.429938
84.9655	24.7736	0.478167
84.9681	24.6922	0.534343
84.9706	24.6284	0.578409
84.9732	24.6123	0.589454
84.9757	24.6419	0.568881
84.9782	24.6959	0.531491
84.9808	24.7552	0.490344
84.9833	24.7968	0.461507
84.9859	24.8047	0.455984
84.9884	24.7653	0.483164
84.9909	24.68	0.542028
84.9935	24.5771	0.613057
84.996	24.5181	0.653825
84.9986	24.5139	0.656655
85.0011	24.54	0.638509
85.0036	24.5864	0.606319
85.0062	24.6398	0.569299
85.0087	24.6613	0.554376
85.0113	24.6938	0.531773
85.0138	24.7857	0.468177
85.0163	24.951	0.353799
85.0189	25.0693	0.271868
85.0214	25.0653	0.274584
85.024	24.9638	0.344639
85.0265	24.8754	0.405736
85.029	24.9585	0.348141
85.0316	24.9164	0.377192
85.0341	24.8353	0.433192
85.0367	24.7652	0.481535
85.0392	24.7153	0.51601
85.0417	24.6787	0.541178
85.0443	24.6356	0.57092
85.0468	24.5726	0.614425
85.0494	24.5596	0.623306
85.0519	24.6077	0.589982
85.0544	24.7158	0.515149
85.057	24.8527	0.420343
85.0595	25.0161	0.307307
85.0621	25.1885	0.187974
85.0646	25.3279	0.0915402
85.0671	25.3077	0.10543
85.0697	25.3119	0.102438
85.0722	25.3803	0.0550219
[truncated: 27,939 more rows]
