# Supplementary material for: A Revised Mid-Pliocene Composite Section for ODP Site 846
Source: Copernicus journal article supplement (doi:10.5194/cp-2019-133), 2020-02-21
Supplement: Supplementary file 2 [file Table S10 850 composite isotopes & SST.xls]

## Sheet: Site 850 composite SST & isotoe
		TABLE S10: SITE 850 SST AND ISOTOPE COMPOSITE
Lef	hole	core	section	cm top	cm depth	mbsf	composite depth (this work)	Uk'37	SST (P&W)	SST (M)	species	adjusted d18O	adjusted d13C
138	850B	6	4	125	126	56.26	61.6592	0.896305	25.2149	25.8274	Cib	3.302	-0.014
138	850B	6	4	130	131	56.31	61.7094	0.914976	25.764	26.3932	Cib	3.25633	-0.045
138	850B	6	4	140	141	56.41	61.8099	0.911794	25.6704	26.2968	Cib	3.3275	-0.146
138	850B	6	4	145	146	56.46	61.8601	0.90068	25.3435	25.96	Cib	3.23367	-0.163333
138	850B	6	5	0	1	56.51	61.9103	0.885703	24.903	25.5062	CMU	3.34325	-0.1315
138	850B	6	5	5	6	56.56	61.9606	0.885531	24.898	25.5009	Cib	3.56175	-0.27125
138	850B	6	5	10	11	56.61	62.0108	0.882279	24.8023	25.4024	Cib	3.5275	-0.2675
138	850B	6	5	15	16	56.66	62.061	0.89584	25.2012	25.8133	Cib	3.235	-0.217333
138	850B	6	5	20	21	56.71	62.1113	0.879061	24.7077	25.3049	Uvg	3.11	-0.0255
138	850B	6	5	25	26	56.81	62.1615	0.904265	25.449	26.0686	Cib	3.3015	-0.174
138	850B	6	5	30	31	56.86	62.2117	0.904559	25.4576	26.0776
138	850B	6	5	35	36	56.86	62.2619	0.899453	25.3075	25.9228	Cib	3.535	-0.25525
138	850B	6	5	40	41	56.91	62.3122	0.906421	25.5124	26.134	Cib	3.579	-0.364667
138	850B	6	5	45	46	56.96	62.3624	0.894079	25.1494	25.76	Uvg	3.418	-0.28875
138	850B	6	5	50	51	57.01	62.4126	0.886725	24.9331	25.5371	Uvg	3.327	-0.192
138	850B	6	5	55	56	57.06	62.4626	0.8963	25.2147	25.8273	Cib	3.452	-0.2045
138	850B	6	5	60	61	57.11	62.5109	0.905497	25.4852	26.106	Cib	3.249	-0.32925
138	850B	6	5	65	66	57.16	62.5593	0.911227	25.6537	26.2796	Uvg	2.924	-0.0815
138	850B	6	5	70	71	57.21	62.6077	0.919439	25.8953	26.5284	Cib	3.032	-0.1365
138	850B	6	5	75	76	57.26	62.6561	0.905104	25.4736	26.0941	Cib	3.055	-0.268
138	850B	6	5	80	81	57.31	62.7048	0.902324	25.3919	26.0098	Cib	3.0505	-0.285
138	850A	7	1	30	31	55.51	62.75	0.915427	25.7773	26.4069	Uvg	3.264	-0.2685
138	850B	6	5	85	86	57.36	62.7548	0.894301	25.1559	25.7667	Cib	3.14667	-0.234667
138	850A	7	1	35	36	55.56	62.8	0.903251	25.4191	26.0379
138	850B	6	5	90	91	57.41	62.8048	0.89977	25.3168	25.9324	Cib	3.234	-0.426333
138	850A	7	1	40	41	55.61	62.85	0.89418	25.1524	25.763	Uvg	3.388	-0.32
138	850B	6	5	96	97	57.46	62.8548	0.885561	24.8988	25.5018	CMU	3.21033	-0.213667
138	850A	7	1	45	46	55.66	62.9	0.898463	25.2783	25.8928
138	850B	6	5	100	101	57.51	62.9048	0.911884	25.673	26.2995	Cib	3.297	-0.195
138	850A	7	1	50	51	55.71	62.95	0.90597	25.4991	26.1203
138	850B	6	5	105	106	57.56	62.9547	0.916668	25.8138	26.4445	Uvg	3.156	-0.26
138	850A	7	1	55	56	55.76	63	0.902154	25.3869	26.0047
138	850B	6	5	110	111	57.61	63.0047	0.927946	26.1455	26.7863	Cib	3.1685	-0.236
138	850A	7	1	60	61	55.81	63.05	0.91879	25.8762	26.5088	Cib	3.109	-0.1885
138	850B	6	5	115	116	57.66	63.0547	0.925264	26.0666	26.705	Uvg	3.136	0.05
138	850A	7	1	65	66	55.86	63.1	0.92411	26.0327	26.67	Uvg	3.2105	-0.127
138	850B	6	5	121	122	55.91	63.1147	0.918038	25.8541	26.486
138	850A	7	1	70	71	55.91	63.15	0.923506	26.0149	26.6517	Cib	3.231	0.092
138	850B	6	5	125	126	55.96	63.1547	0.91499	25.7644	26.3936	CMU	3.1815	0.116
138	850A	7	1	75	76	55.96	63.2	0.920191	25.9174	26.5513
138	850A	7	1	80	81	56.01	63.25	0.908288	25.5673	26.1905
138	850A	7	1	85	86	56.06	63.3	0.911536	25.6628	26.289
138	850A	7	1	90	91	56.11	63.35	0.925425	26.0713	26.7099
138	850A	7	1	95	96	56.16	63.4	0.931384	26.2466	26.8904
138	850A	7	1	100	101	56.21	63.45	0.937561	26.4283	27.0776
138	850A	7	1	105	106	56.26	63.5	0.937342	26.4218	27.071
138	850A	7	1	110	111	56.31	63.55	0.938234	26.4481	27.098
138	850A	7	1	115	116	56.36	63.6	0.939414	26.4828	27.1338
138	850A	7	1	120	121	56.41	63.65	0.936089	26.385	27.033	Cib	3.3955	0.0175
138	850A	7	1	125	126	56.46	63.7	0.92951	26.1915	26.8336
138	850A	7	1	130	131	56.51	63.75	0.933843	26.3189	26.9649
138	850A	7	1	135	136	56.56	63.8	0.935581	26.37	27.0176
138	850A	7	1	140	141	56.61	63.85	0.941801	26.553	27.2061	Uvg	3.342	0.349
138	850A	7	1	145	146	56.66	63.9	0.940005	26.5002	27.1517
138	850A	7	2	0	1	56.71	63.95	0.942759	26.5811	27.2351
138	850A	7	2	5	6	56.76	64	0.945784	26.6701	27.3268
138	850A	7	2	10	11	56.81	64.05	0.943491	26.6027	27.2573	Uvg	3.381	0.304
138	850A	7	2	15	16	56.86	64.1	0.93996	26.4988	27.1503
138	850A	7	2	20	21	56.91	64.15	0.94024	26.507	27.1588
138	850A	7	2	25	26	56.96	64.2	0.93987	26.4962	27.1476
138	850A	7	2	30	31	57.01	64.25	0.93669	26.4026	27.0512	Uvg	3.404	0.114
138	850A	7	2	35	36	57.06	64.3	0.934069	26.3256	26.9718
138	850A	7	2	40	41	57.11	64.35	0.933474	26.3081	26.9538	Cib	3.733	-1.061
138	850A	7	2	45	46	57.16	64.4	0.936474	26.3963	27.0447
138	850A	7	2	50	51	57.21	64.45	0.928721	26.1683	26.8097	Cib	3.719	-1.131
138	850A	7	2	55	56	57.26	64.5	0.930246	26.2131	26.856
138	850A	7	2	60	61	57.31	64.55	0.93127	26.2432	26.887
138	850A	7	2	65	66	57.36	64.6	0.924156	26.034	26.6714	Cib	3.553	-0.342
138	850A	7	2	70	71	57.41	64.65	0.92184	25.9659	26.6012	Cib	3.343	-0.628
138	850A	7	2	75	76	57.46	64.7	0.916051	25.7956	26.4258	Cib	3.4855	-0.3365
138	850A	7	2	80	81	57.51	64.75	0.910598	25.6352	26.2606
138	850A	7	2	85	86	57.56	64.8	0.911156	25.6516	26.2775	Cib	3.558	-1.54
138	850A	7	2	90	91	57.61	64.85	0.929446	26.1896	26.8317	Cib	3.282	-0.171
138	850A	7	2	95	96	57.66	64.9	0.933989	26.3232	26.9694	Cib	3.326	-0.166
138	850A	7	2	100	101	57.71	64.95	0.937299	26.4206	27.0697
138	850A	7	2	105	106	57.76	65	0.942888	26.5849	27.239
138	850A	7	2	110	111	57.81	65.05	0.939588	26.4879	27.139
138	850A	7	2	115	116	57.86	65.1	0.929659	26.1959	26.8382
138	850A	7	2	120	121	57.91	65.15	0.934577	26.3405	26.9872
138	850A	7	2	125	126	57.96	65.2	0.931911	26.2621	26.9064	Cib	3.142	0.01
138	850A	7	2	130	131	58.01	65.25	0.928486	26.1613	26.8026	Uvg	3.253	-0.119
138	850A	7	2	135	136	58.06	65.3	0.927622	26.1359	26.7764	Cib	3.271	-0.0506667
138	850A	7	2	140	141	58.11	65.35	0.931367	26.2461	26.8899	Cib	3.177	-0.298
138	850A	7	2	145	146	58.16	65.4	0.929813	26.2004	26.8428
138	850A	7	3	0	1	58.21	65.45	0.926879	26.1141	26.7539	Cib	3.35	-0.027
138	850A	7	3	5	6	58.26	65.5	0.923426	26.0125	26.6493	Cib	3.416	0.01
138	850A	7	3	10	11	58.31	65.55	0.920278	25.9199	26.5539	Cib	3.32	-1.273
138	850A	7	3	15	16	58.36	65.6	0.921373	25.9521	26.587
138	850A	7	3	20	21	58.41	65.65	0.919995	25.9116	26.5453	Cib	3.398	-0.712
138	850A	7	3	25	26	58.46	65.7	0.921183	25.9466	26.5813	Cib	3.237	-0.061
138	850A	7	3	30	31	58.51	65.75	0.925683	26.0789	26.7177	Cib	3.246	0.006
138	850A	7	3	35	36	58.56	65.8	0.93174	26.2571	26.9012	Cib	3.349	0.266
138	850A	7	3	40	41	58.61	65.85	0.925244	26.066	26.7044	Cib	3.372	0.31
138	850A	7	3	45	46	58.66	65.9	0.921409	25.9532	26.5882	Cib	3.246	0.274
138	850A	7	3	51	52	58.72	65.96	0.924087	26.032	26.6693	Cib	3.192	0.303
138	850A	7	3	55	56	58.76	66	0.922182	25.976	26.6116	Cib	3.187	0.201
138	850A	7	3	60	61	58.81	66.05	0.913416	25.7181	26.3459	Cib	3.0555	0.3955
138	850A	7	3	65	66	58.86	66.1	0.921324	25.9507	26.5856	Cib	3.243	0.259
138	850A	7	3	69	70	58.91	66.15	0.915819	25.7888	26.4187
138	850A	7	3	75	76	58.96	66.2	0.909632	25.6068	26.2313	Cib	3.275	0.249
138	850A	7	3	80	81	59.01	66.25	0.909949	25.6161	26.2409	Cib	3.16133	0.229667
138	850A	7	3	85	86	59.06	66.3	0.905823	25.4948	26.1158	Cib	3.477	0.078
138	850A	7	3	90	91	59.11	66.35	0.900208	25.3297	25.9457	Uvg	3.207	0.188
138	850A	7	3	95	96	59.16	66.4	0.900801	25.3471	25.9637	Cib	3.094	0.276
138	850A	7	3	100	101	59.21	66.45	0.902978	25.4111	26.0296	Cib	3.241	-0.169
138	850A	7	3	105	106	59.26	66.5	0.909561	25.6047	26.2291	Uvg	3.251	0.478
138	850A	7	3	110	111	59.31	66.55	0.909062	25.5901	26.214	Cib	3.285	0.025
138	850A	7	3	115	116	59.36	66.6	0.909741	25.61	26.2346
138	850A	7	3	120	121	59.41	66.65	0.908809	25.5826	26.2063	Cib	3.497	0.135
138	850A	7	3	125	126	59.46	66.7	0.904355	25.4516	26.0714			0.08
138	850A	7	3	130	131	59.51	66.75	0.907562	25.5459	26.1685	Cib	3.331	0.2465
138	850A	7	3	135	136	59.56	66.8	0.90396	25.44	26.0594			0.015
138	850A	7	3	140	141	59.61	66.85	0.896455	25.2193	25.832			0.18
138	850A	7	4	0	1	59.71	66.95	0.894525	25.1625	25.7735	Cib	3.2635	-0.008
138	850A	7	4	5	6	59.76	67	0.887981	24.97	25.5752	Cib	3.354	0.257
138	850B	7	1	25	26	60.26	67.0108	0.890806	25.0531	25.6608	Cib	3.359	-0.576
138	850A	7	4	10	11	59.81	67.05	0.896143	25.2101	25.8225	Cib	3.447	0.058
138	850B	7	1	30	31	60.31	67.0547	0.899474	25.3081	25.9235	Cib	3.29133	0.22
138	850B	7	1	35	36	60.36	67.0987	0.899234	25.301	25.9162	Cib	3.265	0.218
138	850A	7	4	15	16	59.86	67.1	0.902625	25.4007	26.0189	Cib	3.236	0.297
138	850B	7	1	40	41	60.41	67.1427	0.893281	25.1259	25.7358	CMU	3.101	0.2965
138	850A	7	4	20	21	59.91	67.15	0.906112	25.5033	26.1246	Cib	3.168	0.082
138	850B	7	1	45	46	60.46	67.1867	0.913286	25.7143	26.342	Cib	3.097	0.325
138	850A	7	4	25	26	59.96	67.2	0.907556	25.5458	26.1684	Cib	2.844	-0.2935
138	850B	7	1	50	51	60.51	67.2306	0.905025	25.4713	26.0917	Cib	3.153	-0.004
138	850A	7	4	30	31	60.01	67.25	0.902901	25.4088	26.0273	Uvg	2.805	0.192
138	850B	7	1	55	56	60.56	67.2747	0.911005	25.6472	26.2729	Cib	3.189	0.154
138	850A	7	4	35	36	60.06	67.3	0.889724	25.0213	25.628
138	850B	7	1	60	61	60.61	67.3187	0.917091	25.8262	26.4573	Cib	3.2345	0.1475
138	850A	7	4	40	41	60.11	67.35	0.895479	25.1906	25.8024	Cib	3.195	-0.168
138	850B	7	1	65	66	60.66	67.3627	0.901305	25.3619	25.9789	Cib	3.3	0.089
138	850A	7	4	45	46	60.16	67.4	0.893302	25.1265	25.7364	Cib	3.3615	0.16
138	850B	7	1	70	71	60.71	67.4067	0.899679	25.3141	25.9297	Cib	3.389	0.053
138	850A	7	4	51	52	60.21	67.45	0.901641	25.3718	25.9891	Cib	3.357	-0.367667
138	850B	7	1	75	76	60.76	67.4507	0.898729	25.2861	25.9009	Cib	3.348	-0.1035
138	850B	7	1	80	81	60.81	67.4947	0.90205	25.3838	26.0015	Cib	3.423	-0.073
138	850A	7	4	55	56	60.26	67.5	0.88549	24.8968	25.4997	Cib	3.317	0.031
138	850B	7	1	85	86	60.86	67.5389	0.906924	25.5272	26.1492	Cib	3.424	0.095
138	850A	7	4	60	61	60.31	67.55	0.908664	25.5784	26.2019	Cib	3.349	0.034
138	850B	7	1	90	91	60.91	67.5835	0.902903	25.4089	26.0274	Cib	3.376	0.235
138	850A	7	4	65	66	60.36	67.6	0.890587	25.0467	25.6541	Cib	3.81767	0.023
138	850B	7	1	95	96	60.96	67.6281	0.891273	25.0668	25.6749	Cib	3.2965	-0.086
138	850A	7	4	70	71	60.41	67.65	0.899224	25.3007	25.9159	Cib	3.163	0.042
138	850B	7	1	100	101	61.01	67.6728	0.89216	25.0929	25.7018	Cib	3.202	0.055
138	850A	7	4	75	76	60.46	67.7	0.89888	25.2906	25.9055	Cib	3.312	-0.0545
138	850B	7	1	105	106	61.06	67.7178	0.886209	24.9179	25.5215	CMU	3.431	0.067
138	850A	7	4	80	81	60.51	67.75	0.892026	25.089	25.6978	Cib	3.223	0.015
138	850B	7	1	110	111	61.11	67.7632	0.890421	25.0418	25.6491	Cib	3.20275	0.024
138	850A	7	4	85	86	60.56	67.8	0.887374	24.9522	25.5568	Uvg	3.225	0.005
138	850B	7	1	115	116	61.16	67.8086	0.886131	24.9156	25.5191	Cib	3.3405	0.073
138	850A	7	4	90	91	60.61	67.85	0.892639	25.107	25.7163	Cib	3.139	-0.461
138	850B	7	1	120	121	61.21	67.854	0.879622	24.7242	25.3219	Cib	3.4915	-0.3285
138	850B	7	1	125	126	61.26	67.8993	0.876358	24.6282	25.223	Cib	3.371	-0.1735
138	850A	7	4	95	96	60.66	67.9	0.891954	25.0869	25.6956	Cib	2.844	-0.373
138	850B	7	1	130	131	61.31	67.9459	0.879443	24.7189	25.3165	Cib	3.353	0.042
138	850A	7	4	100	101	60.71	67.95	0.882612	24.8121	25.4125	Cib	2.807	-0.422
138	850B	7	1	135	136	61.36	67.9927	0.88064	24.7541	25.3527	CMU	3.6995	-0.431
138	850A	7	4	105	106	60.76	68	0.885709	24.9032	25.5063	Cib	3.272	-0.261
138	850B	7	1	140	141	61.41	68.0395	0.873323	24.5389	25.131	CMU	3.622	-0.2395
138	850A	7	4	110	111	60.81	68.05	0.867947	24.3808	24.9681	Uvg	3.605	-0.3395
138	850B	7	1	145	146	61.46	68.0863	0.876767	24.6402	25.2354	Cib	3.5835	-0.331
138	850A	7	4	115	116	60.86	68.1	0.878141	24.6806	25.277	Cib	3.432	-0.4175
138	850B	7	2	0	1	61.51	68.1332	0.864353	24.2751	24.8592	CMU	3.7255	-0.3925
138	850A	7	4	120	121	60.91	68.15	0.862686	24.2261	24.8087	Cib	3.8565	-0.3
138	850B	7	2	5	6	61.56	68.18	0.862071	24.208	24.79	CMU	3.94	-0.5685
138	850A	7	4	125	126	60.96	68.2	0.861745	24.1984	24.7802	CMU	3.926	-0.389
138	850B	7	2	9	10	61.6	68.2174	0.868187	24.3879	24.9754	Cib	3.914	-0.3865
138	850A	7	4	130	131	61.01	68.25	0.880973	24.7639	25.3628	Cib	3.768	-0.3145
138	850B	7	2	15	16	61.66	68.2736	0.872959	24.5282	25.12	Cib	3.7685	-0.581
138	850A	7	4	135	136	61.06	68.3	0.873408	24.5414	25.1336	CMU	3.765	-0.202
138	850B	7	2	20	21	61.71	68.3204	0.873253	24.5369	25.1289	CMU	3.7845	-0.4075
138	850A	7	4	140	141	61.11	68.35	0.883079	24.8259	25.4266
138	850B	7	2	25	26	61.76	68.3672	0.876388	24.629	25.2239	Cib	3.603	-0.415
138	850A	7	4	145	146	61.16	68.4	0.884664	24.8725	25.4747	Cib	3.764	-0.228
138	850B	7	2	30	31	61.81	68.4141	0.872938	24.5276	25.1193	CMU	3.431	-0.5065
138	850B	7	2	35	36	61.86	68.4609	0.871985	24.4996	25.0905	Cib	3.6035	-0.4425
138	850A	7	5	5	6	61.26	68.5	0.886736	24.9334	25.5375	Uvg	3.5715	-0.007
138	850B	7	2	40	41	61.91	68.5077	0.871788	24.4938	25.0845	Cib	3.578	-0.656
138	850B	7	2	45	46	61.96	68.5452	0.885999	24.9117	25.5151	Cib	3.3915	-0.173
138	850A	7	5	10	11	61.31	68.55	0.887324	24.9507	25.5553	CMU	3.5815	-0.02
138	850A	7	5	15	16	61.36	68.6	0.913418	25.7182	26.346	Cib	3.258	-0.19
138	850B	7	2	51	52	61.41	68.6107	0.897389	25.2467	25.8603
138	850B	7	2	55	56	61.46	68.6482	0.903029	25.4126	26.0312
138	850A	7	5	20	21	61.41	68.65	0.911151	25.6515	26.2773	Cib	3.332	-0.173
138	850B	7	2	60	61	61.46	68.695	0.901189	25.3585	25.9754
138	850A	7	5	25	26	61.46	68.7	0.896918	25.2329	25.846	Cib	3.062	-0.206
138	850B	7	2	65	66	62.16	68.7418	0.912087	25.679	26.3057	Cib	3.138	-0.0225
138	850A	7	5	31	32	61.51	68.75	0.907937	25.557	26.1799
138	850B	7	2	71	72	61.56	68.7897	0.906104	25.503	26.1244
138	850A	7	5	35	36	61.56	68.8	0.903006	25.4119	26.0305
138	850B	7	2	75	76	62.26	68.8381	0.901688	25.3732	25.9905	Cib	3.212	-0.1095
138	850A	7	5	40	41	61.61	68.85	0.888399	24.9823	25.5878
138	850B	7	2	80	81	62.31	68.8865	0.894561	25.1636	25.7746	Cib	3.299	-0.253
138	850A	7	5	45	46	61.66	68.9	0.894197	25.1529	25.7636	Cib	3.241	-0.261
138	850B	7	2	85	86	62.36	68.9349	0.901405	25.3649	25.982	Cib	3.281	0.039
138	850A	7	5	50	51	61.71	68.95	0.900432	25.3362	25.9525	Cib	3.262	-0.156
138	850B	7	2	89	90	62.41	68.9736	0.902939	25.41	26.0284	Cib	3.172	-0.006
138	850A	7	5	55	56	61.76	69	0.910523	25.633	26.2583	Cib	3.282	-0.199
138	850B	7	2	95	96	62.46	69.0317	0.906011	25.5003	26.1216	CMU	3.087	0.0395
138	850A	7	5	60	61	61.81	69.05	0.888694	24.991	25.5968	CMU	3.412	-0.371333
138	850B	7	2	100	101	62.51	69.0801	0.903097	25.4146	26.0332	Uvg	3.103	-0.124
138	850A	7	5	65	66	61.86	69.1	0.898747	25.2867	25.9014	Uvg	3.12	0.029
138	850B	7	2	105	106	62.56	69.1284	0.901705	25.3737	25.9911	Uvg	3.1995	-0.15
138	850A	7	5	70	71	61.91	69.15	0.902654	25.4016	26.0198	CMU	3.537	0.027
138	850B	7	2	110	111	62.61	69.1768	0.904903	25.4677	26.088	Cib	3.335	-0.125
138	850A	7	5	76	77	61.96	69.2	0.902226	25.389	26.0069	Cib	3.241	-0.165
138	850B	7	2	115	116	62.66	69.2252	0.89248	25.1023	25.7115	Cib	3.3365	-0.021
138	850A	7	5	80	81	62.01	69.25	0.890144	25.0336	25.6407
138	850B	7	2	119	120	62.71	69.2626	0.88303	24.8244	25.4252	Cib	3.2265	-0.151
138	850A	7	5	85	86	62.06	69.3	0.885763	24.9048	25.508
138	850B	7	2	125	126	62.76	69.3188	0.886231	24.9186	25.5222	Cib	3.2255	-0.1365
138	850A	7	5	90	91	62.11	69.35	0.889371	25.0109	25.6173	CMU	3.308	-0.226
138	850B	7	2	130	131	62.81	69.3657	0.890905	25.056	25.6638	Cib	3.247	-0.242
138	850A	7	5	95	96	62.16	69.4	0.902252	25.3898	26.0076
138	850B	7	2	135	136	62.86	69.4125	0.895624	25.1948	25.8068	CMU	3.062	0.0145
138	850A	7	5	100	101	62.21	69.45	0.901099	25.3559	25.9727
138	850B	7	2	140	141	62.91	69.4594	0.89609	25.2085	25.8209	Cib	3.213	-0.039
138	850A	7	5	105	106	62.26	69.5	0.899703	25.3148	25.9304
138	850B	7	2	145	146	62.96	69.5062	0.903929	25.4391	26.0584	Cib	2.8705	0.0425
138	850A	7	5	110	111	62.31	69.55	0.897181	25.2406	25.854	Uvg	2.985	-0.2705
138	850B	7	3	0	1	63.01	69.553	0.902185	25.3878	26.0056	CMU	3.26	-0.0695
138	850B	7	3	5	6	63.06	69.5999	0.894181	25.1524	25.7631	Cib	3.2995	-0.1825
138	850A	7	5	115	116	62.36	69.6	0.898702	25.2854	25.9001	Cib	3.146	-0.3375
138	850B	7	3	10	11	63.11	69.6467	0.883649	24.8426	25.4439	Cib	3.253	-0.348
138	850A	7	5	120	121	62.41	69.65	0.890815	25.0534	25.6611	CMU	3.639	-0.128
138	850B	7	3	15	16	63.16	69.6948	0.88342	24.8359	25.437	CMU	3.57	-0.294
138	850A	7	5	125	126	62.46	69.7	0.887582	24.9583	25.5631	Cib	3.4755	-0.283
138	850B	7	3	20	21	63.21	69.7433	0.882867	24.8196	25.4202	Cib	3.355	-0.255
138	850A	7	5	130	131	62.51	69.75	0.881617	24.7829	25.3823	Cib	3.361	-0.3345
138	850B	7	3	25	26	63.26	69.7917	0.879922	24.733	25.331	Cib	3.376	-0.285
138	850A	7	5	135	136	62.56	69.8	0.888543	24.9865	25.5922	Cib	3.47	-0.2055
138	850B	7	3	30	31	63.31	69.8401	0.881887	24.7908	25.3905	Cib	3.427	-0.376
138	850A	7	5	140	141	62.61	69.85	0.889534	25.0157	25.6222	CMU	3.507	0.187
138	850B	7	3	35	36	63.36	69.8885	0.891414	25.071	25.6792	Cib	3.332	-0.133
138	850A	7	5	145	146	62.66	69.9	0.895606	25.1943	25.8062	Cib	3.2175	-0.05
138	850B	7	3	40	41	62.71	69.9368	0.903157	25.4164	26.0351
138	850B	7	3	45	46	63.46	69.9852	0.908307	25.5678	26.1911	CMU	3.1455	-0.166
138	850A	7	6	5	6	62.76	70	0.907809	25.5532	26.176	Cib	3.229	-0.1085
138	850B	7	3	50	51	63.51	70.0336	0.912115	25.6798	26.3065	Cib	3.12	0.063
138	850A	7	6	10	11	62.81	70.05	0.910525	25.6331	26.2583
138	850B	7	3	55	56	62.86	70.082	0.906764	25.5225	26.1444
138	850A	7	6	15	16	62.86	70.1	0.91102	25.6476	26.2733	Uvg	2.865	-0.13
138	850B	7	3	60	61	62.91	70.1304	0.917204	25.8295	26.4607
138	850A	7	6	20	21	62.91	70.15	0.914136	25.7393	26.3678
138	850B	7	3	65	66	62.96	70.1788	0.899342	25.3042	25.9194
138	850A	7	6	25	26	62.96	70.2	0.91001	25.6179	26.2427	CMU	3.129	-0.92
138	850B	7	3	70	71	63.01	70.2271	0.901562	25.3695	25.9867
138	850A	7	6	30	31	63.01	70.25	0.906866	25.5255	26.1475	CMU	3.227	-0.133
138	850B	7	3	75	76	63.06	70.2755	0.901972	25.3815	25.9991
138	850A	7	6	35	36	63.06	70.3	0.901198	25.3588	25.9757
138	850B	7	3	80	81	63.81	70.324	0.904366	25.4519	26.0717	Cib	3.0065	-0.0615
138	850A	7	6	40	41	63.11	70.35	0.900942	25.3512	25.9679	Cib	3.118	-0.262
138	850B	7	3	85	86	63.86	70.3723	0.905405	25.4825	26.1032	Cib	3.177	-0.2325
138	850A	7	6	45	46	63.16	70.4	0.909745	25.6102	26.2347	Cib	3.151	-0.733
138	850B	7	3	90	91	63.91	70.4207	0.913113	25.7092	26.3368	GSGB	3.011
138	850A	7	6	50	51	63.21	70.45	0.921467	25.9549	26.5899
138	850B	7	3	95	96	63.96	70.4691	0.932274	26.2728	26.9174	Cib	3.0905	-0.0165
138	850A	7	6	55	56	63.26	70.5	0.929587	26.1937	26.836	Cib	3.1	-0.133
138	850B	7	3	100	101	64.01	70.5175	0.933273	26.3021	26.9477	Cib	3.163	-0.049
138	850A	7	6	60	61	63.31	70.55	0.925458	26.0723	26.7109
138	850B	7	3	105	106	64.06	70.5659	0.932043	26.266	26.9104	Cib	3.0095	-0.216
138	850A	7	6	65	66	63.36	70.6	0.924106	26.0325	26.6699
138	850B	7	3	110	111	64.11	70.6142	0.93513	26.3568	27.0039	CMU	2.933	-0.13
138	850A	7	6	70	71	63.41	70.65	0.918565	25.8696	26.502
138	850B	7	3	115	116	64.16	70.6626	0.933733	26.3157	26.9616	CMU	2.876	-0.214
138	850A	7	6	75	76	63.46	70.7	0.933908	26.3208	26.9669
138	850B	7	3	120	121	64.21	70.7109	0.92968	26.1965	26.8388	CMU	3.067	-0.236
138	850A	7	6	80	81	63.51	70.75	0.923907	26.0267	26.6639
138	850B	7	3	125	126	64.26	70.7594	0.920535	25.9275	26.5617	CMU	3.162	-0.267
138	850A	7	6	85	86	63.56	70.8	0.926847	26.1131	26.7529	Cib	3.1035	-0.262
138	850B	7	3	130	131	64.31	70.8078	0.923282	26.0083	26.6449	Cib	3.093	-0.102
138	850A	7	6	90	91	63.61	70.85	0.908351	25.5691	26.1924	Cib	3.132	-0.733
138	850B	7	3	135	136	64.36	70.8562	0.920618	25.9299	26.5642	Cib	3.215	-0.152
138	850A	7	6	95	96	63.66	70.9	0.91822	25.8594	26.4915
138	850B	7	3	140	141	64.41	70.9045	0.926149	26.0926	26.7318	Cib	3.0995	-0.297
138	850A	7	6	100	101	63.71	70.95	0.929282	26.1848	26.8267
138	850B	7	3	145	146	64.46	70.9529	0.919873	25.908	26.5416	Cib	2.797	0.049
138	850B	7	4	0	1	64.51	71.0013	0.93393	26.3215	26.9676
138	850B	7	4	5	6	64.56	71.0497	0.935166	26.3578	27.005	Cib	2.974	0.01
138	850B	7	4	10	11	64.61	71.0982	0.936465	26.396	27.0444	GSGB	2.869
138	850B	7	4	15	16	64.66	71.1482	0.935362	26.3636	27.011
138	850B	7	4	20	21	64.71	71.1982	0.932966	26.2931	26.9383	CMU	3.027	-0.108
138	850B	7	4	25	26	64.76	71.2482	0.926159	26.0929	26.7321	GSGB	3.227
138	850B	7	4	30	31	64.81	71.2982	0.909389	25.5997	26.2239	GSGB	3.17
138	850B	7	4	35	36	64.86	71.3482	0.926153	26.0927	26.7319
138	850B	7	4	40	41	64.91	71.3982	0.933759	26.3165	26.9624	CMU	3.1995	0.006
138	850B	7	4	45	46	64.96	71.4482	0.93166	26.2547	26.8988
138	850B	7	4	50	51	65.01	71.4982	0.934835	26.3481	26.995
138	850B	7	4	55	56	65.06	71.5487	0.93119	26.2409	26.8845	GSGB	2.967
138	850B	7	4	60	61	65.11	71.6003	0.924847	26.0543	26.6923
138	850B	7	4	70	71	65.21	71.7035	0.902098	25.3852	26.003
138	850B	7	4	75	76	65.26	71.7552	0.908084	25.5613	26.1844
138	850B	7	4	80	81	65.31	71.8068	0.905514	25.4857	26.1065
138	850B	7	4	85	86	65.36	71.8584	0.912729	25.6979	26.3251	Cib	3.1005	-0.006
138	850B	7	4	90	91	65.41	71.91	0.918433	25.8657	26.498	CMU	3.192	0.163
138	850B	7	4	95	96	65.46	71.9616	0.923028	26.0008	26.6372	Cib	3.099	0.121
138	850B	7	4	100	101	65.51	72.0029	0.927377	26.1287	26.769
138	850B	7	4	105	106	65.56	72.0649	0.928518	26.1623	26.8036
138	850B	7	4	110	111	65.61	72.1165	0.93087	26.2315	26.8748	Cib	2.972	0.0345
138	850B	7	4	115	116	65.66	72.1681	0.931071	26.2374	26.8809	GSGB	3.039
138	850B	7	4	120	121	65.71	72.2199	0.929285	26.1849	26.8268	CMU	2.9065	0.17
138	850B	7	4	125	126	65.76	72.2733	0.927198	26.1235	26.7636	Pyrg	3.085
138	850B	7	4	130	131	65.81	72.3267	0.928753	26.1692	26.8107
138	850B	7	4	135	136	65.86	72.3801	0.934246	26.3308	26.9772
138	850B	7	4	140	141	65.91	72.4335	0.924325	26.039	26.6765
138	850B	7	4	145	146	65.96	72.4869	0.931046	26.2366	26.8802	Pyrg	3.013
138	850B	7	5	0	1	66.01	72.5403	0.919958	25.9105	26.5442	GSGB	3.177
138	850B	7	5	5	6	66.06	72.5936	0.914426	25.7478	26.3765
138	850B	7	5	10	11	66.11	72.647	0.921223	25.9477	26.5825	Cib	3.144	-0.064
138	850B	7	5	15	16	66.16	72.7004	0.928012	26.1474	26.7882	GSGB	3.363
138	850B	7	5	20	21	66.21	72.7538	0.920526	25.9272	26.5614	GSGB	3.565
138	850B	7	5	25	26	66.26	72.8072	0.923337	26.0099	26.6466
138	850B	7	5	30	31	66.31	72.8606	0.926723	26.1095	26.7492	CMU	3.647
138	850B	7	5	35	36	66.36	72.914	0.924646	26.0484	26.6863
138	850B	7	5	40	41	66.41	72.9673	0.923596	26.0175	26.6544	Cib	3.2465	-0.015
138	850B	7	5	45	46	66.46	73.0207	0.917811	25.8474	26.4791	GSGB	3.169
138	850B	7	5	50	51	66.51	73.0741	0.916506	25.809	26.4396	GSGB	3.218
138	850B	7	5	55	56	66.56	73.1275	0.912641	25.6953	26.3224
138	850B	7	5	60	61	66.61	73.1809	0.926333	26.098	26.7374	GSGB	3.317
138	850B	7	5	65	66	66.66	73.2343	0.931396	26.2469	26.8908	GSGB
138	850B	7	5	70	71	66.71	73.2877	0.945377	26.6582	27.3145		3.033
138	850B	7	5	75	76	66.76	73.3411	0.936494	26.3969	27.0453	GSGB	2.998
138	850B	7	5	80	81	66.81	73.3944	0.938368	26.452	27.1021
138	850B	7	5	85	86	66.86	73.4478	0.937392	26.4233	27.0725
138	850B	7	5	90	91	66.91	73.5012	0.939098	26.4735	27.1242
138	850B	7	5	95	96	66.96	73.5546	0.936334	26.3922	27.0404
138	850B	7	5	100	101	67.01	73.608	0.926445	26.1013	26.7408	Cib	3.017	-0.049
138	850B	7	5	105	106	67.06	73.6574	0.919008	25.8826	26.5154	CMU	3.189
138	850B	7	5	110	111	67.11	73.7027	0.917833	25.848	26.4798	CMU	3.084	-0.049
138	850B	7	5	115	116	67.16	73.7481	0.909334	25.5981	26.2222	Cib	3.252	-0.0845
138	850B	7	5	120	121	67.21	73.7934	0.912856	25.7017	26.329	Cib	3.361	-0.4125
138	850B	7	5	125	126	67.26	73.8388	0.917643	25.8424	26.474	Cib	3.292	-0.235
138	850B	7	5	130	131	67.31	73.8841	0.918532	25.8686	26.501	Cib	3.269	-0.035
138	850B	7	5	135	136	67.36	73.9295	0.92203	25.9715	26.607	Cib	3.2795	-0.1795
138	850B	7	5	140	141	67.41	73.9749	0.928138	26.1511	26.7921	Uvg	3.362	-0.14
138	850B	7	5	145	146	67.46	74.0202	0.927401	26.1294	26.7697	Cib	3.196	-0.028
138	850B	7	6	0	1	67.51	74.0658	0.923839	26.0247	26.6618	Cib	3.254	0.06
138	850B	7	6	5	6	67.56	74.1126	0.919981	25.9112	26.5449	Cib	3.381	-0.423
138	850B	7	6	10	11	67.61	74.1595	0.909765	25.6107	26.2353	Cib	3.08	-0.54
138	850B	7	6	15	16	67.66	74.2063	0.909494	25.6028	26.2271	Cib	3.219	0.065
138	850B	7	6	20	21	67.71	74.2531	0.925955	26.0869	26.7259
138	850B	7	6	25	26	67.76	74.2999	0.930913	26.2327	26.8761	Cib	3.151	0.105
138	850B	7	6	30	31	67.81	74.3468	0.927344	26.1278	26.768	CMU	3.0115	0.158
138	850B	7	6	35	36	67.86	74.3936	0.927207	26.1237	26.7639	GSGB	2.9985
138	850B	7	6	40	41	67.91	74.4404	0.943082	26.5906	27.2449	Cib	3.098	0.25
138	850B	7	6	45	46	67.96	74.4873	0.914526	25.7508	26.3796	Cib	3.186	0.181
138	850B	7	6	50	51	68.01	74.536	0.921601	25.9589	26.594	Cib	3.181	0.222
138	850B	7	6	55	56	68.06	74.586	0.918143	25.8572	26.4892	Cib	3.116	0.2015
138	850B	7	6	60	61	68.11	74.636	0.914941	25.763	26.3921	Cib	3.264	-0.026
138	850B	7	6	65	66	68.16	74.686	0.915844	25.7895	26.4195	Cib	3.126
138	850B	7	6	70	71	68.21	74.736	0.921444	25.9542	26.5892	Cib	3.164	-0.0525
138	850B	7	6	75	76	68.26	74.786	0.918912	25.8798	26.5125
138	850B	7	6	80	81	68.31	74.836	0.924104	26.0325	26.6698	Cib	3.1515	0.155
138	850B	7	6	85	86	68.36	74.886	0.921542	25.9571	26.5922	Cib	3.096	0.164
138	850B	7	6	90	91	68.41	74.936	0.918231	25.8597	26.4919	Cib	3.079	0.135
138	850B	7	6	95	96	68.46	74.9866	0.919757	25.9046	26.5381
138	850B	7	6	100	101	68.51	75.0383	0.921768	25.9638	26.599	Cib	2.944	0.264
138	850B	7	6	105	106	68.56	75.0899	0.926224	26.0948	26.7341	Cib	3.144	-0.041
138	850B	7	6	110	111	68.61	75.1415	0.928282	26.1554	26.7964	Cib	3.587	0.264
138	850B	7	6	115	116	68.66	75.1931	0.930352	26.2162	26.8592	Cib	3.0205	0.108
138	850B	7	6	119	120	68.7	75.2344	0.926741	26.11	26.7497	Uvg	3.007	0.213
138	850B	7	6	125	126	68.76	75.2963	0.921098	25.9441	26.5787	Cib	2.9325	0.082
138	850B	7	6	130	131	68.81	75.348	0.923717	26.0211	26.6581	Cib	3.2845	0.176
138	850B	7	6	135	136	68.86	75.3996	0.917591	25.8409	26.4725	Cib	3.27	-0.151
138	850B	7	6	140	141	68.91	75.4502	0.911206	25.6531	26.279	Cib	3.175	-0.125
138	850B	7	6	145	146	68.96	75.5002	0.918381	25.8641	26.4964	Cib	3.331	-0.382
138	850B	7	7	0	1	69.01	75.5502	0.909941	25.6159	26.2406	Cib	3.351	-0.139
138	850B	7	7	5	6	69.06	75.6002	0.906403	25.5118	26.1334	Cib	3.356	-0.133
138	850B	7	7	9	10	69.11	75.6401	0.906157	25.5046	26.126
138	850B	7	7	15	16	69.16	75.7001	0.902543	25.3983	26.0164	Cib	3.4465	-0.148
138	850B	7	7	20	21	69.26	75.7501	0.900801	25.3471	25.9637	Cib	3.404	-0.158
138	850B	7	7	25	26	69.31	75.8001	0.902467	25.3961	26.0142	Cib	3.48	-0.211
138	850B	7	7	30	31	69.36	75.8501	0.899119	25.2976	25.9127	Cib	3.33	-0.264
138	850B	7	7	35	36	69.41	75.9001	0.910015	25.6181	26.2429	Cib
138	850B	7	7	40	41	69.46	75.9501	0.920276	25.9199	26.5538	Cib	3.284	-0.252
138	850B	7	7	45	46	69.51	76.0001	0.924014	26.0298	26.6671	Cib	3.351	-0.202
138	850B	7	7	50	51	69.56	76.0501	0.935424	26.3654	27.0128	Cib	3.277	-0.053
138	850B	7	7	55	56	69.61	76.1002	0.932589	26.282	26.9269	Pyrg	2.888
138	850B	7	7	60	61	69.66	76.1502	0.935057	26.3546	27.0017	Cib	2.711	0.083
138	850B	7	7	65	66	69.71	76.2002	0.929381	26.1877	26.8297	Uvg	2.895	0.1
138	850B	7	7	70	71	69.76	76.2502	0.927298	26.1264	26.7666	CMU	3.005	0.083
138	850B	7	7	75	76	69.81	76.3001	0.932656	26.284	26.929
