# Supplementary material for: A Revised Mid-Pliocene Composite Section for ODP Site 846
Source: Copernicus journal article supplement (doi:10.5194/cp-2019-133), 2020-02-21
Supplement: Supplementary file 3 [file Table S2 846B grape composite.xls]

## Sheet: Sheet1
TABLE S2: 846B COMPOSITE GRAPE SECTION
Leg	Site	Hole	core	section	depth (cm)	depth mbsf	shipboard mcd	log depth (m)	WBD (g/cc)	detrended and normalized WBD
138	846	B	10	1	8	8	83.08	81.496	1.341	-1.42091
138	846	B	10	1	8.7	8.7	83.09	81.5126	1.3847	-1.53958
138	846	B	10	1	10.8	83.11	95.66	81.5291	1.413	-1.3677
138	846	B	10	1	13	83.13	95.68	81.5457	1.4	-0.65774
138	846	B	10	1	14.7	83.15	95.7	81.5622	1.3757	-0.19727
138	846	B	10	1	17	83.17	95.72	81.5787	1.417	-0.40931
138	846	B	10	1	18.4	83.18	95.73	81.5868	1.3635	-0.8055
138	846	B	10	1	20.9	83.21	95.76	81.6111	1.446	-0.13377
138	846	B	10	1	23	83.23	95.78	81.6273	1.471	-1.0048
138	846	B	10	1	24.7	83.25	95.8	81.6435	1.4467	0.33703
138	846	B	10	1	26.9	83.27	95.82	81.6596	1.442	0.74327
138	846	B	10	1	28.1	83.28	95.83	81.6673	1.4242	0.34709
138	846	B	10	1	30.4	83.3	95.85	81.6826	1.425	0.27063
138	846	B	10	1	33	83.33	95.88	81.7055	1.452	-0.020325
138	846	B	10	1	34	83.34	95.89	81.7131	1.4472	-0.0070298
138	846	B	10	1	36.5	83.36	95.91	81.7284	1.46	0.43175
138	846	B	10	1	38	83.38	95.93	81.7437	1.4743	0.35258
138	846	B	10	1	40.1	83.4	95.95	81.759	1.436	0.56086
138	846	B	10	1	43	83.43	95.98	81.7819	1.439	0.79328
138	846	B	10	1	43.9	83.44	95.99	81.7895	1.4283	0.16931
138	846	B	10	1	46.4	83.46	96.01	81.8048	1.468	0.21759
138	846	B	10	1	48	83.48	96.03	81.8201	1.4473	0.043512
138	846	B	10	1	50.1	83.5	96.05	81.8354	1.41	0.68839
138	846	B	10	1	53	83.53	96.08	81.8583	1.505	0.35134
138	846	B	10	1	54	83.54	96.09	81.8659	1.4755	-0.25637
138	846	B	10	1	56.2	83.56	96.11	81.8812	1.504	1.2888
138	846	B	10	1	58	83.58	96.13	81.8965	1.467	0.80831
138	846	B	10	1	60.2	83.6	96.15	81.9117	1.483	1.2715
138	846	B	10	1	62.4	83.62	96.17	81.9269	1.424	0.66895
138	846	B	10	1	63	83.63	96.18	81.9345	1.455	0.92902
138	846	B	10	1	64	83.64	96.19	81.9421	1.4488	-0.031216
138	846	B	10	1	66.2	83.66	96.21	81.9572	1.426	0.47265
138	846	B	10	1	68	83.68	96.23	81.9724	1.47	0.37178
138	846	B	10	1	70.1	83.7	96.25	81.9875	1.4464	-0.00025747
138	846	B	10	1	72.3	83.72	96.27	82.0026	1.426	0.71513
138	846	B	10	1	73	83.73	96.28	82.0101	1.483	0.33087
138	846	B	10	1	73.7	83.74	96.29	82.0176	1.4627	-0.0013128
138	846	B	10	1	76.2	83.76	96.31	82.0327	1.443	0.92559
138	846	B	10	1	78	83.78	96.33	82.0477	1.455	0.59422
138	846	B	10	1	79.8	83.8	96.35	82.0628	1.4585	0.27371
138	846	B	10	1	82.1	83.82	96.37	82.0779	1.469	0.46843
138	846	B	10	1	83.5	83.83	96.38	82.0854	1.4235	0.52511
138	846	B	10	1	86	83.86	96.41	82.108	1.371	0.69516
138	846	B	10	1	88	83.88	96.43	82.123	1.425	-0.045683
138	846	B	10	1	89.7	83.9	96.45	82.1381	1.4462	-0.90042
138	846	B	10	1	92.1	83.92	96.47	82.1532	1.382	-0.022333
138	846	B	10	1	93	83.93	96.48	82.1607	1.387	0.32234
138	846	B	10	1	93.6	83.94	96.49	82.1682	1.4053	-0.7225
138	846	B	10	1	95.8	83.96	96.51	82.1833	1.357	-0.64168
138	846	B	10	1	98	83.98	96.53	82.1983	1.393	-0.34391
138	846	B	10	1	99.6	84	96.55	82.2134	1.3798	-1.1309
138	846	B	10	1	102.1	84.02	96.57	82.2284	1.418	-0.54563
138	846	B	10	1	103.5	84.03	96.58	82.236	1.3628	-0.76013
138	846	B	10	1	105.7	84.06	96.61	82.2585	1.407	-0.13992
138	846	B	10	1	108	84.08	96.63	82.2736	1.319	-1.0381
138	846	B	10	1	109.6	84.1	96.65	82.2886	1.408	-0.31995
138	846	B	10	1	111.8	84.12	96.67	82.3037	1.362	-1.7523
138	846	B	10	1	114.3	84.14	96.69	82.3188	1.388	-0.30474
138	846	B	10	1	116.5	84.17	96.72	82.3413	1.421	-1.054
138	846	B	10	1	119	84.19	96.74	82.3564	1.403	-0.63147
138	846	B	10	1	121.2	84.21	96.76	82.3714	1.411	-0.095067
138	846	B	10	1	123.6	84.24	96.79	82.394	1.373	-0.38873
138	846	B	10	1	125.8	84.26	96.81	82.4091	1.385	-0.25909
138	846	B	10	1	128.3	84.28	96.83	82.4241	1.405	-0.87791
138	846	B	10	1	130.5	84.31	96.86	82.4467	1.389	-0.68345
138	846	B	10	1	133	84.33	96.88	82.4617	1.371	-0.35856
138	846	B	10	1	135.2	84.35	96.9	82.4768	1.353	-0.61942
138	846	B	10	1	137.7	84.38	96.93	82.4993	1.416	-0.91309
138	846	B	10	1	139.9	84.4	96.95	82.5144	1.379	-1.2065
138	846	B	10	1	142.2	84.42	96.97	82.5294	1.4728	-0.18196
138	846	B	10	1	144.7	84.45	97	82.552	1.399	-0.78477
138	846	B	10	2	3	84.53	97.08	82.6122	1.3575	0.73986
138	846	B	10	2	4.5	84.54	97.09	82.6197	1.3728	-0.46173
138	846	B	10	2	6.7	84.57	97.12	82.6423	1.305	-1.1378
138	846	B	10	2	8.2	84.58	97.13	82.6498	1.3365	-0.88908
138	846	B	10	2	10.5	84.6	97.15	82.6649	1.349	-1.9928
138	846	B	10	2	13	84.63	97.18	82.6878	1.325	-1.481
138	846	B	10	2	14.3	84.64	97.19	82.6976	1.3605	-1.2779
138	846	B	10	2	16.7	84.67	97.22	82.7269	1.356	-1.6692
138	846	B	10	2	18.1	84.68	97.23	82.7366	1.3467	-1.0918
138	846	B	10	2	20.4	84.7	97.25	82.7562	1.35	-1.1656
138	846	B	10	2	23	84.73	97.28	82.7855	1.37	-1.3182
138	846	B	10	2	24	84.74	97.29	82.7952	1.3578	-1.2643
138	846	B	10	2	26.3	84.76	97.31	82.8148	1.323	-0.93938
138	846	B	10	2	28	84.78	97.33	82.8343	1.301	-1.1379
138	846	B	10	2	29.9	84.8	97.35	82.8538	1.3704	-1.7052
138	846	B	10	2	32.2	84.82	97.37	82.8734	1.315	-2.0636
138	846	B	10	2	33	84.83	97.38	82.8831	1.384	-0.93472
138	846	B	10	2	33.7	84.84	97.39	82.8929	1.3623	-1.8364
138	846	B	10	2	36.1	84.86	97.41	82.9124	1.356	-0.71423
138	846	B	10	2	38	84.88	97.43	82.9321	1.318	-1.0673
138	846	B	10	2	39.9	84.9	97.45	82.952	1.3404	-1.1709
138	846	B	10	2	42.2	84.92	97.47	82.9718	1.366	-1.7897
138	846	B	10	2	43	84.93	97.48	82.9817	1.352	-1.4255
138	846	B	10	2	43.7	84.94	97.49	82.9916	1.3458	-1.0092
138	846	B	10	2	46	84.96	97.51	83.0115	1.381	-1.2375
138	846	B	10	2	48	84.98	97.53	83.0313	1.341	-1.3384
138	846	B	10	2	49.8	85	97.55	83.0512	1.3176	-0.76674
138	846	B	10	2	52.1	85.02	97.57	83.071	1.316	-1.4181
138	846	B	10	2	53	85.03	97.58	83.0809	1.353	-1.7991
138	846	B	10	2	53.6	85.04	97.59	83.0909	1.3477	-1.8254
138	846	B	10	2	55.9	85.06	97.61	83.1107	1.326	-1.2239
138	846	B	10	2	58	85.08	97.63	83.1306	1.393	-1.3112
138	846	B	10	2	59.8	85.1	97.65	83.1504	1.3228	-1.6643
138	846	B	10	2	62.1	85.12	97.67	83.1702	1.292	-0.57466
138	846	B	10	2	63	85.13	97.68	83.1802	1.307	-1.7171
138	846	B	10	2	63.6	85.14	97.69	83.1901	1.3198	-2.2185
138	846	B	10	2	65.9	85.16	97.71	83.2099	1.36	-1.975
138	846	B	10	2	68	85.18	97.73	83.2298	1.355	-1.7667
138	846	B	10	2	69.7	85.2	97.75	83.2496	1.3267	-1.1137
138	846	B	10	2	72	85.22	97.77	83.2695	1.328	-1.1956
138	846	B	10	2	73.4	85.23	97.78	83.2794	1.3435	-1.6568
138	846	B	10	2	75.8	85.26	97.81	83.3092	1.324	-1.6359
138	846	B	10	2	78	85.28	97.83	83.329	1.273	-1.3843
138	846	B	10	2	79.6	85.3	97.85	83.3489	1.3077	-1.7021
138	846	B	10	2	81.9	85.32	97.87	83.3687	1.363	-2.5324
138	846	B	10	2	83.5	85.33	97.88	83.3786	1.3553	-1.9686
138	846	B	10	2	85.7	85.36	97.91	83.4084	1.28	-1.0691
138	846	B	10	2	88	85.38	97.93	83.4282	1.327	-1.1944
138	846	B	10	2	89.5	85.39	97.94	83.4382	1.3415	-2.4204
138	846	B	10	2	91.9	85.42	97.97	83.4679	1.333	-1.6564
138	846	B	10	2	93.4	85.43	97.98	83.4779	1.3678	-1.4208
138	846	B	10	2	95.7	85.46	98.01	83.5076	1.394	-1.5599
138	846	B	10	2	98	85.48	98.03	83.5275	1.386	-0.99363
138	846	B	10	2	99.5	85.49	98.04	83.5374	1.3922	-0.56815
138	846	B	10	2	101.8	85.52	98.07	83.5672	1.375	-0.69911
138	846	B	10	2	103.3	85.53	98.08	83.5774	1.3907	-0.59903
138	846	B	10	2	105.5	85.56	98.11	83.6082	1.428	-0.87914
138	846	B	10	2	108	85.58	98.13	83.6287	1.41	-0.62476
138	846	B	10	2	109.3	85.59	98.14	83.639	1.47	-0.017583
138	846	B	10	2	111.7	85.62	98.17	83.6698	1.411	-0.31125
138	846	B	10	2	114	85.64	98.19	83.6903	1.446	0.66447
138	846	B	10	2	116.4	85.66	98.21	83.7119	1.456	-0.29603
138	846	B	10	2	118.7	85.69	98.24	83.7453	1.528	0.27265
138	846	B	10	2	121	85.71	98.26	83.7676	1.444	0.43483
138	846	B	10	2	123.4	85.73	98.28	83.7899	1.447	1.6058
138	846	B	10	2	125.7	85.76	98.31	83.8234	1.487	0.23826
138	846	B	10	2	128	85.78	98.33	83.8457	1.442	0.28655
138	846	B	10	2	130.4	85.8	98.35	83.868	1.408	0.93685
138	846	B	10	2	132.7	85.83	98.38	83.9014	1.476	0.20387
138	846	B	10	2	135	85.85	98.4	83.9237	1.455	-0.34986
138	846	B	10	2	137.4	85.87	98.42	83.946	1.429	0.75602
138	846	B	10	2	139.7	85.9	98.45	83.9795	1.427	0.41355
138	846	B	10	2	142.1	85.92	98.47	84.0018	1.4963	-0.010019
138	846	B	10	2	144.4	85.94	98.49	84.0241	1.436	-0.043088
138	846	B	10	3	3	86.03	98.58	84.1245	1.442	1.0826
138	846	B	10	3	4.9	86.05	98.6	84.1468	1.4463	0.10045
138	846	B	10	3	7.1	86.07	98.62	84.1691	1.434	0.19754
138	846	B	10	3	8.1	86.08	98.63	84.1802	1.463	0.26779
138	846	B	10	3	10.4	86.1	98.65	84.2025	1.458	0.066585
138	846	B	10	3	13	86.13	98.68	84.236	1.445	0.53764
138	846	B	10	3	14	86.14	98.69	84.2471	1.4548	0.45603
138	846	B	10	3	16.4	86.16	98.71	84.2694	1.464	0.24398
138	846	B	10	3	18	86.18	98.73	84.2917	1.439	0.40345
138	846	B	10	3	20.2	86.2	98.75	84.3128	1.4522	0.55207
138	846	B	10	3	22.4	86.22	98.77	84.3316	1.496	0.14477
138	846	B	10	3	23	86.23	98.78	84.3411	1.455	0.35928
138	846	B	10	3	23.9	86.24	98.79	84.3505	1.4505	1.0717
138	846	B	10	3	26.4	86.26	98.81	84.3693	1.469	0.40405
138	846	B	10	3	28	86.28	98.83	84.3881	1.46	0.3303
138	846	B	10	3	29.9	86.3	98.85	84.407	1.423	0.63078
138	846	B	10	3	32.3	86.32	98.87	84.4258	1.451	0.48382
138	846	B	10	3	33	86.33	98.88	84.4352	1.424	-0.11846
138	846	B	10	3	33.8	86.34	98.89	84.4446	1.4485	0.33686
138	846	B	10	3	36	86.36	98.91	84.4634	1.399	-0.10298
138	846	B	10	3	38	86.38	98.93	84.4823	1.43	0.29512
138	846	B	10	3	39.8	86.4	98.95	84.5011	1.4366	-0.5108
138	846	B	10	3	42.3	86.42	98.97	84.5199	1.451	-0.0069404
138	846	B	10	3	43	86.43	98.98	84.5294	1.451	0.10018
138	846	B	10	3	43.7	86.44	98.99	84.5388	1.4417	0.33422
138	846	B	10	3	45.9	86.46	99.01	84.5577	1.44	0.33369
138	846	B	10	3	48	86.48	99.03	84.5764	1.484	0.1813
138	846	B	10	3	49.8	86.5	99.05	84.5953	1.4264	0.15366
138	846	B	10	3	52.1	86.52	99.07	84.6141	1.376	0.86904
138	846	B	10	3	53	86.53	99.08	84.6236	1.479	-0.068417
138	846	B	10	3	53.6	86.54	99.09	84.6329	1.4383	-0.88872
138	846	B	10	3	55.9	86.56	99.11	84.6518	1.366	0.78663
138	846	B	10	3	58	86.58	99.13	84.6706	1.379	0.12443
138	846	B	10	3	59.2	86.59	99.14	84.68	1.4268	-1.0528
138	846	B	10	3	61.4	86.61	99.16	84.6989	1.462	-0.84176
138	846	B	10	3	63	86.63	99.18	84.7177	1.4428	-0.064005
138	846	B	10	3	65.3	86.65	99.2	84.7365	1.454	0.50765
138	846	B	10	3	68	86.68	99.23	84.7648	1.425	0.19501
138	846	B	10	3	69	86.69	99.24	84.7742	1.4333	0.37643
138	846	B	10	3	71.4	86.71	99.26	84.7931	1.461	-0.095945
138	846	B	10	3	73	86.73	99.28	84.8119	1.482	0.039116
138	846	B	10	3	75	86.75	99.3	84.8307	1.4698	0.48874
138	846	B	10	3	77.4	86.77	99.32	84.8495	1.471	0.8299
138	846	B	10	3	78	86.78	99.33	84.8589	1.443	0.63114
138	846	B	10	3	78.9	86.79	99.34	84.8683	1.439	0.6504
138	846	B	10	3	81.3	86.81	99.36	84.8872	1.415	0.19429
138	846	B	10	3	83	86.83	99.38	84.9059	1.468	0.12868
138	846	B	10	3	84.9	86.85	99.4	84.9247	1.4426	-0.26235
138	846	B	10	3	87.4	86.87	99.42	84.9436	1.512	0.59947
138	846	B	10	3	88	86.88	99.43	84.953	1.478	0.18593
138	846	B	10	3	88.9	86.89	99.44	84.9623	1.478	1.3149
138	846	B	10	3	91.1	86.91	99.46	84.9798	1.466	0.76113
138	846	B	10	3	93	86.93	99.48	84.9972	1.482	0.7606
138	846	B	10	3	94.9	86.95	99.5	85.0146	1.4384	0.56482
138	846	B	10	3	97.3	86.97	99.52	85.032	1.444	0.82463
138	846	B	10	3	98	86.98	99.53	85.0407	1.466	0.11496
138	846	B	10	3	98.8	86.99	99.54	85.0494	1.4568	0.20581
138	846	B	10	3	101	87.01	99.56	85.0669	1.395	0.56324
138	846	B	10	3	103	87.03	99.58	85.0842	1.413	0.41356
138	846	B	10	3	104.8	87.05	99.6	85.1015	1.4096	-0.59304
138	846	B	10	3	107.2	87.07	99.62	85.119	1.396	-0.30069
138	846	B	10	3	108	87.08	99.63	85.1277	1.431	-0.35628
138	846	B	10	3	108.7	87.09	99.64	85.1363	1.425	-0.57782
138	846	B	10	3	110.9	87.11	99.66	85.1528	1.389	-0.008875
138	846	B	10	3	113.3	87.13	99.68	85.1693	1.432	-0.10703
138	846	B	10	3	115.5	87.15	99.7	85.1858	1.33	-0.6933
138	846	B	10	3	118	87.18	99.73	85.2105	1.367	0.0055488
138	846	B	10	3	120.2	87.2	99.75	85.2267	1.381	-1.6546
138	846	B	10	3	122.7	87.23	99.78	85.2508	1.387	-1.0534
138	846	B	10	3	124.9	87.25	99.8	85.2668	1.403	-0.8261
138	846	B	10	3	127.3	87.27	99.82	85.2829	1.382	-0.72901
138	846	B	10	3	129.5	87.29	99.84	85.2989	1.423	-0.4692
138	846	B	10	3	132	87.32	99.87	85.323	1.416	-0.81168
138	846	B	10	3	134.2	87.34	99.89	85.3391	1.425	-0.14511
138	846	B	10	3	136.7	87.37	99.92	85.3631	1.425	-0.2598
138	846	B	10	3	138.9	87.39	99.94	85.3791	1.401	-0.11389
138	846	B	10	3	141.4	87.41	99.96	85.3952	1.443	-0.11441
138	846	B	10	3	143.5	87.43	99.98	85.4113	1.4805	-0.50544
138	846	B	10	3	146	87.46	100.01	85.4351	1.469	0.17714
138	846	B	10	4	3	87.53	100.08	85.491	1.48	0.78544
138	846	B	10	4	4.7	87.55	100.1	85.507	1.4828	0.5978
138	846	B	10	4	7.2	87.57	100.12	85.523	1.479	0.77625
138	846	B	10	4	8	87.58	100.13	85.531	1.423	0.82155
138	846	B	10	4	8.7	87.59	100.14	85.539	1.4823	0.75945
138	846	B	10	4	10.9	87.61	100.16	85.5549	1.41	-0.15223
138	846	B	10	4	13	87.63	100.18	85.5713	1.512	0.81263
138	846	B	10	4	14.7	87.65	100.2	85.5881	1.4987	-0.36481
138	846	B	10	4	17	87.67	100.22	85.6045	1.467	1.2943
138	846	B	10	4	18.4	87.68	100.23	85.6125	1.5338	1.0771
138	846	B	10	4	20.9	87.71	100.26	85.6365	1.529	0.56104
138	846	B	10	4	23	87.73	100.28	85.6525	1.558	1.6479
138	846	B	10	4	24.7	87.75	100.3	85.6685	1.5193	1.5688
138	846	B	10	4	26.9	87.77	100.32	85.6845	1.457	2.0401
138	846	B	10	4	28.4	87.78	100.33	85.6924	1.5208	1.4107
138	846	B	10	4	30.8	87.81	100.36	85.7167	1.488	0.39569
138	846	B	10	4	33	87.83	100.38	85.7328	1.484	1.4338
138	846	B	10	4	34.5	87.85	100.4	85.749	1.4935	0.89903
138	846	B	10	4	36.9	87.87	100.42	85.7652	1.433	0.83342
138	846	B	10	4	38.1	87.88	100.43	85.7733	1.4765	0.98773
138	846	B	10	4	40.3	87.9	100.45	85.791	1.465	0.0028227
138	846	B	10	4	43	87.93	100.48	85.8189	1.437	0.70981
138	846	B	10	4	44.1	87.94	100.49	85.8281	1.466	0.52243
138	846	B	10	4	46.6	87.97	100.52	85.856	1.426	0.066059
138	846	B	10	4	48	87.98	100.53	85.8652	1.4632	0.53765
138	846	B	10	4	50.3	88	100.55	85.8839	1.381	-0.11371
138	846	B	10	4	53	88.03	100.58	85.9121	1.42	0.49077
138	846	B	10	4	53.6	88.04	100.59	85.9215	1.3898	-0.84695
138	846	B	10	4	55.8	88.06	100.61	85.9402	1.449	-0.21292
138	846	B	10	4	58	88.08	100.63	85.959	1.416	-0.70428
138	846	B	10	4	59.6	88.1	100.65	85.9777	1.4225	0.25788
138	846	B	10	4	62.1	88.12	100.67	85.9974	1.434	-0.27958
138	846	B	10	4	63.4	88.13	100.68	86.0068	1.3918	-0.17409
138	846	B	10	4	65.7	88.16	100.71	86.035	1.411	0.012233
138	846	B	10	4	68	88.18	100.73	86.0537	1.399	-0.67438
138	846	B	10	4	69.5	88.19	100.74	86.0631	1.4018	-0.36278
138	846	B	10	4	71.8	88.22	100.77	86.0913	1.48	-0.55882
138	846	B	10	4	73.3	88.23	100.78	86.1006	1.4337	-0.51299
138	846	B	10	4	75.6	88.26	100.81	86.1288	1.406	0.75805
138	846	B	10	4	78	88.28	100.83	86.1475	1.48	0.0036437
138	846	B	10	4	79.4	88.29	100.84	86.1569	1.4533	-0.44678
138	846	B	10	4	81.7	88.32	100.87	86.1851	1.509	0.75646
138	846	B	10	4	83	88.33	100.88	86.1944	1.3963	0.32232
138	846	B	10	4	85.5	88.35	100.9	86.2132	1.416	1.2275
138	846	B	10	4	88	88.38	100.93	86.2423	1.402	-0.60643
138	846	B	10	4	89.2	88.39	100.94	86.2517	1.4267	-0.28671
138	846	B	10	4	91.6	88.42	100.97	86.2798	1.404	-0.51529
138	846	B	10	4	93	88.43	100.98	86.2892	1.4215	-0.11421
138	846	B	10	4	95.4	88.45	101	86.308	1.335	-0.48354
138	846	B	10	4	98	88.48	101.03	86.3361	1.349	-0.19959
138	846	B	10	4	99.1	88.49	101.04	86.3455	1.3673	-1.6073
138	846	B	10	4	101.5	88.51	101.06	86.3642	1.38	-1.38
138	846	B	10	4	103	88.53	101.08	86.383	1.3928	-1.0822
138	846	B	10	4	105.3	88.55	101.1	86.4018	1.34	-0.87667
138	846	B	10	4	108	88.58	101.13	86.4299	1.371	-0.66866
138	846	B	10	4	109	88.59	101.14	86.439	1.425	-1.5286
138	846	B	10	4	111.4	88.61	101.16	86.4568	1.41	-1.0247
138	846	B	10	4	113.7	88.64	101.19	86.4837	1.441	-0.14687
138	846	B	10	4	116.1	88.66	101.21	86.5013	1.408	-0.39146
138	846	B	10	4	118.4	88.68	101.23	86.5188	1.434	0.11241
138	846	B	10	4	120.7	88.71	101.26	86.5449	1.389	-0.42532
138	846	B	10	4	123.1	88.73	101.28	86.5623	1.443	-0.0028057
138	846	B	10	4	125.4	88.75	101.3	86.5796	1.468	-0.73552
138	846	B	10	4	127.7	88.78	101.33	86.6057	1.452	0.14231
138	846	B	10	4	130.1	88.8	101.35	86.623	1.332	0.54855
138	846	B	10	4	132.4	88.82	101.37	86.6404	1.389	0.28769
138	846	B	10	4	134.7	88.85	101.4	86.6665	1.456	-1.6656
138	846	B	10	4	137.1	88.87	101.42	86.6838	1.366	-0.73868
138	846	B	10	4	139.4	88.89	101.44	86.7014	1.396	0.35093
138	846	B	10	4	141.8	88.92	101.47	86.7287	1.458	-1.1142
138	846	B	10	4	144.1	88.94	101.49	86.7469	1.454	-0.62663
138	846	B	10	5	3	89.03	101.58	86.8301	1.444	0.37978
138	846	B	10	5	4.7	89.05	101.6	86.8492	1.4432	0.31417
138	846	B	10	5	7.2	89.07	101.62	86.8689	1.421	0.15093
138	846	B	10	5	8	89.08	101.63	86.8786	1.44	0.13765
138	846	B	10	5	8.7	89.09	101.64	86.8884	1.4525	-0.22382
138	846	B	10	5	10.9	89.11	101.66	86.9079	1.481	0.084792
138	846	B	10	5	13	89.13	101.68	86.9274	1.486	0.28765
138	846	B	10	5	14.8	89.15	101.7	86.9469	1.4477	0.75084
138	846	B	10	5	17	89.17	101.72	86.9664	1.467	0.83166
138	846	B	10	5	18.5	89.18	101.73	86.9761	1.4457	0.20769
138	846	B	10	5	21	89.21	101.76	87.0054	1.468	0.52146
138	846	B	10	5	23	89.23	101.78	87.0249	1.454	0.17383
138	846	B	10	5	24.7	89.25	101.8	87.0443	1.4923	0.53668
138	846	B	10	5	27.1	89.27	101.82	87.0638	1.439	0.30836
138	846	B	10	5	28.2	89.28	101.83	87.0736	1.4708	0.93181
138	846	B	10	5	30.7	89.31	101.86	87.1027	1.449	0.063245
138	846	B	10	5	33	89.33	101.88	87.1222	1.453	0.58067
138	846	B	10	5	34.4	89.34	101.89	87.1319	1.4467	0.22516
138	846	B	10	5	36.9	89.37	101.92	87.1611	1.445	0.28945
138	846	B	10	5	38.5	89.38	101.93	87.1708	1.4047	0.18614
138	846	B	10	5	40.5	89.4	101.95	87.1902	1.395	0.15849
138	846	B	10	5	43	89.43	101.98	87.2194	1.43	-0.49855
138	846	B	10	5	44.4	89.44	101.99	87.2291	1.4342	-0.6561
138	846	B	10	5	46.6	89.47	102.02	87.2583	1.484	-0.087413
138	846	B	10	5	48.2	89.48	102.03	87.268	1.4398	-0.019882
138	846	B	10	5	50.4	89.5	102.05	87.2874	1.482	0.79041
138	846	B	10	5	53	89.53	102.08	87.3166	1.398	0.070999
138	846	B	10	5	54.4	89.54	102.09	87.3263	1.4302	0.75682
138	846	B	10	5	56.6	89.57	102.12	87.3555	1.46	-0.61071
138	846	B	10	5	58.1	89.58	102.13	87.3652	1.4402	-0.087604
138	846	B	10	5	60.5	89.6	102.15	87.3846	1.436	0.39728
138	846	B	10	5	63	89.63	102.18	87.4138	1.463	0.073784
138	846	B	10	5	64.2	89.64	102.19	87.4235	1.4747	0.0057258
138	846	B	10	5	66.5	89.67	102.22	87.4527	1.48	0.44424
138	846	B	10	5	68	89.68	102.23	87.4624	1.4857	0.6338
138	846	B	10	5	70.4	89.7	102.25	87.4819	1.431	0.72005
138	846	B	10	5	73	89.73	102.28	87.511	1.505	0.81146
138	846	B	10	5	74.1	89.74	102.29	87.5208	1.4797	-0.078266
138	846	B	10	5	76.5	89.76	102.31	87.5402	1.514	1.1252
138	846	B	10	5	78	89.78	102.33	87.5597	1.5092	0.71252
138	846	B	10	5	80.2	89.8	102.35	87.5791	1.513	1.2706
138	846	B	10	5	83	89.83	102.38	87.6083	1.451	1.1912
138	846	B	10	5	84.1	89.84	102.39	87.618	1.4842	1.2533
138	846	B	10	5	86.3	89.86	102.41	87.6374	1.462	0.24398
138	846	B	10	5	88	89.88	102.43	87.6565	1.4765	0.7831
138	846	B	10	5	90.1	89.9	102.45	87.6757	1.452	0.4219
138	846	B	10	5	93	89.93	102.48	87.7044	1.431	0.65704
138	846	B	10	5	94	89.94	102.49	87.714	1.4777	0.25814
138	846	B	10	5	96.2	89.96	102.51	87.7326	1.49	-0.084071
138	846	B	10	5	98	89.98	102.53	87.7506	1.518	0.6747
138	846	B	10	5	99.9	90	102.55	87.7686	1.4766	0.87485
138	846	B	10	5	102.1	90.02	102.57	87.7866	1.407	1.3299
138	846	B	10	5	103	90.03	102.58	87.7956	1.433	0.65603
138	846	B	10	5	103.7	90.04	102.59	87.8046	1.4488	-0.47668
138	846	B	10	5	105.9	90.06	102.61	87.8225	1.391	-0.054168
138	846	B	10	5	108	90.08	102.63	87.8404	1.437	0.20292
138	846	B	10	5	109.8	90.1	102.65	87.8583	1.399	-0.73859
138	846	B	10	5	112	90.12	102.67	87.8762	1.456	0.009332
138	846	B	10	5	114.5	90.14	102.69	87.8941	1.419	-0.60948
138	846	B	10	5	116.7	90.17	102.72	87.921	1.3895	0.31716
138	846	B	10	5	119.2	90.19	102.74	87.9389	1.421	-0.28539
138	846	B	10	5	121.4	90.21	102.76	87.9568	1.422	-0.7659
138	846	B	10	5	126	90.26	102.81	88.0017	1.406	-0.25469
138	846	B	10	5	128.4	90.28	102.83	88.0197	1.395	-0.23895
138	846	B	10	5	130.7	90.31	102.86	88.0468	1.45	-0.50007
138	846	B	10	5	133	90.33	102.88	88.0646	1.369	-0.67958
138	846	B	10	5	135.4	90.35	102.9	88.0818	1.407	0.21478
138	846	B	10	5	137.7	90.38	102.93	88.1071	1.39	-1.1039
138	846	B	10	5	140	90.4	102.95	88.124	1.364	-0.48618
138	846	B	10	5	142.4	90.42	102.97	88.1408	1.388	-0.76331
138	846	B	10	5	144.7	90.45	103	88.1661	1.3758	-1.1871
138	846	B	10	5	147	90.47	103.02	88.1829	1.346	-0.79717
138	846	B	10	6	3	90.53	103.08	88.2333	1.394	-0.99671
138	846	B	10	6	4.8	90.55	103.1	88.2501	1.3573	-1.4826
138	846	B	10	6	7	90.57	103.12	88.2668	1.418	-0.70218
138	846	B	10	6	8.5	90.58	103.13	88.2752	1.35	-1.299
138	846	B	10	6	11	90.61	103.16	88.3003	1.334	-0.31274
138	846	B	10	6	13	90.63	103.18	88.3171	1.4	-1.4197
138	846	B	10	6	14.6	90.65	103.2	88.3339	1.3535	-1.6805
138	846	B	10	6	17.1	90.67	103.22	88.3508	1.39	-0.6072
138	846	B	10	6	18.5	90.68	103.23	88.3593	1.3417	-1.364
138	846	B	10	6	20.7	90.71	103.26	88.3848	1.332	-0.77096
138	846	B	10	6	23	90.73	103.28	88.4017	1.338	-1.5579
138	846	B	10	6	24.7	90.75	103.3	88.4188	1.3635	-1.7157
138	846	B	10	6	26.9	90.77	103.32	88.437	1.374	-1.6186
138	846	B	10	6	28.5	90.78	103.33	88.4461	1.351	-1.204
138	846	B	10	6	30.7	90.81	103.36	88.4734	1.337	-1.0339
138	846	B	10	6	33	90.83	103.38	88.4916	1.375	-1.4087
138	846	B	10	6	34.6	90.85	103.4	88.5098	1.353	-1.637
138	846	B	10	6	36.8	90.87	103.42	88.528	1.417	-1.0192
138	846	B	10	6	38.3	90.88	103.43	88.5371	1.3843	-1.3775
138	846	B	10	6	40.8	90.91	103.46	88.5644	1.442	-0.33693
138	846	B	10	6	43	90.93	103.48	88.5826	1.457	-0.86896
138	846	B	10	6	44.4	90.94	103.49	88.5917	1.412	0.06905
138	846	B	10	6	46.9	90.97	103.52	88.619	1.414	0.31232
138	846	B	10	6	48.3	90.98	103.53	88.6281	1.4315	-0.42013
138	846	B	10	6	50.7	91.01	103.56	88.6555	1.504	-0.38838
138	846	B	10	6	53	91.03	103.58	88.6737	1.466	-0.10417
138	846	B	10	6	54.4	91.04	103.59	88.6828	1.4925	1.0752
138	846	B	10	6	56.8	91.07	103.62	88.7094	1.463	0.45612
138	846	B	10	6	58.3	91.08	103.63	88.7179	1.5013	0.88703
138	846	B	10	6	60.5	91.1	103.65	88.7349	1.506	0.40651
138	846	B	10	6	63	91.13	103.68	88.7604	1.423	1.0294
138	846	B	10	6	64.4	91.14	103.69	88.7689	1.514	1.1051
138	846	B	10	6	66.6	91.17	103.72	88.7936	1.483	-0.24616
138	846	B	10	6	68.3	91.18	103.73	88.8013	1.4598	1.2342
138	846	B	10	6	70.4	91.2	103.75	88.8166	1.502	0.72929
138	846	B	10	6	73	91.23	103.78	88.8396	1.472	0.35156
138	846	B	10	6	74.2	91.24	103.79	88.8472	1.4655	1.0374
138	846	B	10	6	76.5	91.26	103.81	88.8625	1.437	0.54873
138	846	B	10	6	78	91.28	103.83	88.8778	1.4775	0.44244
138	846	B	10	6	80.3	91.3	103.85	88.8931	1.458	-0.021802
138	846	B	10	6	83	91.33	103.88	88.9161	1.519	0.63637
138	846	B	10	6	84	91.34	103.89	88.9238	1.4618	0.31883
138	846	B	10	6	86.4	91.36	103.91	88.9391	1.498	1.3108
138	846	B	10	6	88	91.38	103.93	88.9544	1.4877	0.38014
138	846	B	10	6	90.1	91.4	103.95	88.9697	1.479	0.96807
138	846	B	10	6	93	91.43	103.98	88.9926	1.454	0.79915
138	846	B	10	6	93.9	91.44	103.99	89.0003	1.4698	0.65787
138	846	B	10	6	96.3	91.46	104.01	89.0155	1.476	0.25058
138	846	B	10	6	98	91.48	104.03	89.0308	1.485	0.50767
138	846	B	10	6	100.1	91.5	104.05	89.046	1.4882	0.60748
138	846	B	10	6	102.4	91.52	104.07	89.0612	1.493	0.75339
138	846	B	10	6	103	91.53	104.08	89.0688	1.515	0.80519
138	846	B	10	6	103.8	91.54	104.09	89.0764	1.4933	0.88303
138	846	B	10	6	106.2	91.56	104.11	89.0916	1.458	1.2405
138	846	B	10	6	108	91.58	104.13	89.1068	1.504	0.88739
138	846	B	10	6	109.9	91.6	104.15	89.122	1.49	0.31197
138	846	B	10	6	112.3	91.62	104.17	89.1372	1.525	1.0599
138	846	B	10	6	114.6	91.65	104.2	89.1599	1.511	0.83131
138	846	B	10	6	116.9	91.67	104.22	89.1751	1.519	1.4003
138	846	B	10	6	119.3	91.69	104.24	89.1902	1.547	1.1719
138	846	B	10	6	121.6	91.72	104.27	89.2129	1.517	1.3013
138	846	B	10	6	123.9	91.74	104.29	89.2281	1.51	1.7564
138	846	B	10	6	126.3	91.76	104.31	89.2432	1.508	1.2677
138	846	B	10	6	128.6	91.79	104.34	89.2658	1.51	1.153
138	846	B	10	6	131	91.81	104.36	89.2807	1.497	1.12
138	846	B	10	6	133.3	91.83	104.38	89.2956	1.488	1.152
138	846	B	10	6	135.6	91.86	104.41	89.318	1.462	0.93967
138	846	B	10	6	138	91.88	104.43	89.333	1.541	0.7927
138	846	B	10	6	140.3	91.9	104.45	89.3479	1.518	0.36914
138	846	B	10	6	142.6	91.93	104.48	89.3703	1.5053	1.6537
138	846	B	10	6	145	91.95	104.5	89.3852	1.441	1.279
138	846	B	10	7	3	92.03	104.58	89.4447	1.535	1.0708
138	846	B	10	7	4.7	92.05	104.6	89.4595	1.4803	0.023493
138	846	B	10	7	7.2	92.07	104.62	89.4744	1.476	1.5524
138	846	B	10	7	8.5	92.08	104.63	89.4818	1.4863	0.66268
138	846	B	10	7	10.7	92.11	104.66	89.5039	1.499	0.59138
138	846	B	10	7	13	92.13	104.68	89.5187	1.442	0.75899
138	846	B	10	7	14.6	92.15	104.7	89.5335	1.4767	0.96456
138	846	B	10	7	16.8	92.17	104.72	89.5482	1.513	0.036597
138	846	B	10	7	18.3	92.18	104.73	89.5556	1.4632	0.60038
138	846	B	10	7	20.7	92.21	104.76	89.5777	1.43	1.1908
138	846	B	10	7	23	92.23	104.78	89.5924	1.422	0.37941
138	846	B	10	7	24.5	92.24	104.79	89.5998	1.4468	-0.1605
138	846	B	10	7	26.8	92.27	104.82	89.6219	1.449	-0.29146
138	846	B	10	7	28.2	92.28	104.83	89.6293	1.4395	0.11234
138	846	B	10	7	30.7	92.31	104.86	89.6513	1.445	0.1468
138	846	B	10	7	33	92.33	104.88	89.666	1.392	-0.0083009
138	846	B	10	7	34.4	92.34	104.89	89.6734	1.435	0.080924
138	846	B	10	7	36.8	92.37	104.92	89.6954	1.46	-0.78222
138	846	B	10	7	38.4	92.38	104.93	89.7027	1.475	-0.082838
138	846	B	10	7	40.5	92.4	104.95	89.7174	1.446	0.3234
138	846	B	10	7	43	92.43	104.98	89.7394	1.471	0.56667
138	846	B	10	7	44.3	92.44	104.99	89.7468	1.4433	0.094556
138	846	B	10	7	46.8	92.47	105.02	89.7688	1.486	0.50053
138	846	B	10	7	48.2	92.48	105.03	89.7761	1.4353	0.050112
138	846	B	10	7	50.4	92.5	105.05	89.7908	1.498	0.7438
138	846	B	10	7	53	92.53	105.08	89.8128	1.526	-0.081372
138	846	B	10	7	54.4	92.54	105.09	89.8202	1.446	0.93799
138	846	B	10	7	56.6	92.57	105.12	89.8422	1.534	1.3928
138	846	B	10	7	59	92.59	105.14	89.8569	1.518	0.090599
138	846	B	10	7	61.2	92.61	105.16	89.8716	1.498	1.5219
138	846	B	10	7	63.7	92.64	105.19	89.8936	1.569	1.2608
138	846	B	10	7	65.9	92.66	105.21	89.9083	1.55	0.93483
138	846	B	10	7	68.2	92.68	105.23	89.923	1.562	2.0895
138	846	B	10	7	70.7	92.71	105.26	89.9451	1.541	1.7796
138	846	B	10	7	72.9	92.73	105.28	89.96	1.542	1.9743
138	846	B	10	7	75.4	92.75	105.3	89.9748	1.553	1.6321
138	846	B	10	7	77.6	92.78	105.33	89.9971	1.52	1.6476
138	846	B	10	7	80	92.8	105.35	90.012	1.572	1.826
138	846	B	10	7	82.2	92.82	105.37	90.0269	1.53	1.2886
138	846	B	10	7	84.7	92.85	105.4	90.0494	1.506	2.1338
138	846	D	10	5	78	94.08	105.38	90.0562	1.536	1.49402
138	846	B	10	7	86.9	92.87	105.42	90.0644	1.4432	1.45
138	846	D	10	5	80.3	94.1	105.4	90.0717	1.374	0.86515
138	846	B	10	7	89.4	92.89	105.44	90.0794	1.423	1.0589
138	846	D	10	5	83	94.13	105.43	90.0948	1.4152	0.835045
138	846	B	10	7	91.6	92.92	105.47	90.1019	1.427	1.5463
138	846	D	10	5	84	94.14	105.44	90.1026	1.45	0.711734
138	846	D	10	5	86.3	94.16	105.46	90.118	1.4043	1.54163
138	846	D	10	5	88	94.18	105.48	90.1334	1.431	1.31043
138	846	D	10	5	89.9	94.2	105.5	90.1489	1.409	0.417841
138	846	D	10	5	92.2	94.22	105.52	90.1643	1.411	-0.428554
138	846	D	10	5	93	94.23	105.53	90.172	1.391	0.416987
138	846	D	10	5	93.7	94.24	105.54	90.1798	1.4047	0.755033
138	846	D	10	5	96	94.26	105.56	90.1954	1.349	0.985144
138	846	D	10	5	98	94.28	105.58	90.211	1.332	0.815414
138	846	D	10	5	99.8	94.3	105.6	90.2265	1.3435	0.399625
138	846	D	10	5	102.1	94.32	105.62	90.2421	1.351	0.921935
138	846	D	10	5	103	94.33	105.63	90.2499	1.365	0.398771
138	846	D	10	5	103.6	94.34	105.64	90.2577	1.337	0.782956
138	846	D	10	5	105.9	94.36	105.66	90.2733	1.405	0.64399
138	846	D	10	5	108	94.38	105.68	90.2888	1.3428	0.566526
138	846	D	10	5	109.7	94.4	105.7	90.3044	1.325	0.781262
138	846	D	10	5	112	94.42	105.72	90.32	1.3758	-0.172787
138	846	D	10	5	114.4	94.44	105.74	90.3356	1.384	-0.450159
138	846	D	10	5	116.7	94.47	105.77	90.3589	1.419	-0.327982
138	846	D	10	5	119	94.49	105.79	90.3745	1.3842	-0.989832
138	846	D	10	5	121.3	94.51	105.81	90.3901	1.374	0.25527
138	846	D	10	5	123.7	94.54	105.84	90.4136	1.4038	-0.852841
138	846	D	10	5	126	94.56	105.86	90.4293	1.433	-0.284403
138	846	D	10	5	128.3	94.58	105.88	90.4451	1.414	0.0226035
138	846	D	10	5	130.7	94.61	105.91	90.4687	1.3892	-0.316581
138	846	D	10	5	133	94.63	105.93	90.4844	1.44	0.113458
138	846	D	10	5	135.4	94.65	105.95	90.5002	1.3863	-0.748307
138	846	D	10	5	137.7	94.68	105.98	90.5238	1.428	0.419611
138	846	D	10	5	140	94.7	106	90.5395	1.438	0.172991
138	846	D	10	5	142.4	94.72	106.02	90.5553	1.405	0.064771
138	846	D	10	5	144.7	94.75	106.05	90.5789	1.425	-0.335918
138	846	D	10	6	3	94.83	106.13	90.6419	1.3942	0.138546
138	846	D	10	6	4.8	94.85	106.15	90.6598	1.447	0.322517
138	846	D	10	6	7	94.87	106.17	90.6777	1.414	-0.124024
138	846	D	10	6	8.5	94.88	106.18	90.6867	1.418	-0.0474146
138	846	D	10	6	10.9	94.91	106.21	90.7137	1.387	-0.601889
138	846	D	10	6	13	94.93	106.23	90.7316	1.3787	-0.171857
138	846	D	10	6	14.5	94.94	106.24	90.741	1.39	0.704435
138	846	D	10	6	17.1	94.97	106.27	90.7691	1.429	-0.172991
138	846	D	10	6	18	94.98	106.28	90.7785	1.3777	-0.173284
138	846	D	10	6	18.5	94.99	106.29	90.7879	1.429	-0.250455
138	846	D	10	6	20.7	95.01	106.31	90.8066	1.3908	-0.450949
138	846	D	10	6	23	95.03	106.33	90.8254	1.343	-0.28234
138	846	D	10	6	24.6	95.05	106.35	90.8442	1.369	0.00928139
138	846	B	11	1	3	92.53	106.03	90.8512	1.3533	0.021016
138	846	D	10	6	26.8	95.07	106.37	90.8629	1.387	-0.621812
138	846	B	11	1	4.7	92.55	106.05	90.871	1.3813	-1.1049
138	846	D	10	6	28.1	95.08	106.38	90.8723	1.352	-0.791262
138	846	B	11	1	7.1	92.57	106.07	90.8909	1.334	-0.30817
138	846	D	10	6	30.6	95.11	106.41	90.9004	1.3912	-1.11505
138	846	B	11	1	8	92.58	106.08	90.9008	1.36	-0.43534
138	846	B	11	1	8.6	92.59	106.09	90.9098	1.369	-0.24361
138	846	D	10	6	33	95.13	106.43	90.9192	1.358	-0.561991
138	846	B	11	1	10.8	92.61	106.11	90.9277	1.364	0.13009
138	846	B	11	1	13	92.63	106.13	90.9457	1.381	-0.61347
138	846	B	11	1	14.7	92.65	106.15	90.9637	1.326	-0.18011
138	846	B	11	1	16.7	92.67	106.17	90.9817	1.398	-0.53859
138	846	B	11	1	18.1	92.68	106.18	90.9907	1.388	-0.50632
138	846	B	11	1	20.6	92.71	106.21	91.0178	1.35	-0.83252
138	846	B	11	1	23.2	92.73	106.23	91.0363	1.37	-0.61068
138	846	B	11	1	24.8	92.75	106.25	91.0548	1.41	-1.5169
138	846	B	11	1	26.9	92.77	106.27	91.0732	1.411	-1.7941
138	846	B	11	1	28.5	92.78	106.28	91.0825	1.369	-1.6072
138	846	B	11	1	30.9	92.81	106.31	91.1102	1.397	-1.486
138	846	B	11	1	33	92.83	106.33	91.1286	1.335	-1.2587
138	846	B	11	1	34.5	92.85	106.35	91.1471	1.458	-1.7148
138	846	B	11	1	37	92.87	106.37	91.1656	1.5008	-0.60895
138	846	B	11	1	38.4	92.88	106.38	91.1748	1.461	-1.6207
138	846	B	11	1	40.6	92.91	106.41	91.2025	1.456	-1.9117
138	846	B	11	1	43	92.93	106.43	91.221	1.4457	-1.0851
138	846	B	11	1	44.4	92.94	106.44	91.2302	1.469	-0.95249
138	846	B	11	1	46.9	92.97	106.47	91.2578	1.4133	-0.3838
138	846	B	11	1	48.4	92.98	106.48	91.267	1.501	-0.95083
138	846	B	11	1	50.6	93.01	106.51	91.2947	1.474	-1.117
138	846	B	11	1	53	93.03	106.53	91.3131	1.4654	-0.63216
138	846	B	11	1	54.5	93.04	106.54	91.3222	1.497	-0.15786
138	846	B	11	1	56.7	93.07	106.57	91.3498	1.507	-0.46779
138	846	B	11	1	58.5	93.08	106.58	91.3589	1.4867	-0.87211
138	846	B	11	1	60.6	93.11	106.61	91.3865	1.474	-0.045811
138	846	B	11	1	63	93.13	106.63	91.4048	1.508	-0.91953
138	846	B	11	1	64.5	93.14	106.64	91.414	1.489	-0.24185
138	846	B	11	1	66.7	93.17	106.67	91.4415	1.447	-0.079935
138	846	B	11	1	68.2	93.18	106.68	91.4507	1.4627	-0.61713
138	846	B	11	1	70.6	93.21	106.71	91.4782	1.544	-0.29251
138	846	B	11	1	73	93.23	106.73	91.4966	1.521	-0.79472
138	846	B	11	1	74.2	93.24	106.74	91.5059	1.4735	0.064654
138	846	B	11	1	76.7	93.27	106.77	91.5338	1.524	-0.47307
138	846	B	11	1	78	93.28	106.78	91.5431	1.4668	-0.40825
138	846	B	11	1	80.5	93.31	106.81	91.571	1.516	-0.91344
138	846	B	11	1	83	93.33	106.83	91.5897	1.513	-1.0496
138	846	B	11	1	84.1	93.34	106.84	91.599	1.4838	-0.86541
138	846	B	11	1	86.6	93.37	106.87	91.627	1.493	-0.23165
138	846	B	11	1	88	93.38	106.88	91.6363	1.4737	-1.0671
138	846	B	11	1	90.2	93.4	106.9	91.6549	1.5	-0.23244
138	846	B	11	1	93	93.43	106.93	91.6829	1.485	-0.85423
138	846	B	11	1	94.2	93.44	106.94	91.6923	1.4708	-1.6328
138	846	B	11	1	96.4	93.46	106.96	91.711	1.511	-1.2103
138	846	B	11	1	98	93.48	106.98	91.7298	1.4925	-1.4657
138	846	B	11	1	100.1	93.5	107	91.7486	1.447	-0.91845
138	846	B	11	1	103	93.53	107.03	91.7768	1.481	-1.0114
138	846	B	11	1	104.1	93.54	107.04	91.7862	1.5033	-1.489
138	846	B	11	1	106.3	93.56	107.06	91.8051	1.462	-1.7824
138	846	B	11	1	108	93.58	107.08	91.824	1.5	-0.85276
138	846	B	11	1	110	93.6	107.1	91.8429	1.491	-1.3604
138	846	B	11	1	112.3	93.62	107.12	91.8618	1.485	-1.2145
138	846	B	11	1	114.7	93.65	107.15	91.8902	1.4893	-1.3943
138	846	B	11	1	117	93.67	107.17	91.9093	1.497	-1.2972
138	846	B	11	1	119.4	93.69	107.19	91.9285	1.4618	-1.0211
138	846	B	11	1	121.7	93.72	107.22	91.9572	1.495	-1.9168
138	846	B	11	1	124	93.74	107.24	91.9763	1.499	-0.7458
138	846	B	11	1	126.3	93.76	107.26	91.9956	1.5013	-0.90904
138	846	B	11	1	128.7	93.79	107.29	92.0246	1.483	-1.5281
138	846	B	11	1	131	93.81	107.31	92.044	1.4768	-1.2032
138	846	B	11	1	133.4	93.83	107.33	92.0634	1.449	-0.55293
138	846	B	11	1	135.7	93.86	107.36	92.0926	1.483	-0.53745
138	846	B	11	1	138	93.88	107.38	92.1123	1.5075	-1.2213
138	846	B	11	1	140.4	93.9	107.4	92.132	1.421	-0.7663
138	846	B	11	1	142.7	93.93	107.43	92.1605	1.54	-1.7759
138	846	B	11	1	145	93.95	107.45	92.1795	1.4894	0.2249
138	846	B	11	2	3	94.03	107.53	92.256	1.453	0.91972
138	846	B	11	2	4.9	94.05	107.55	92.2752	1.546	0.27107
138	846	B	11	2	7.1	94.07	107.57	92.2943	1.4763	0.18919
138	846	B	11	2	8.5	94.08	107.58	92.3039	1.453	0.020797
138	846	B	11	2	11	94.11	107.61	92.3328	1.491	0.39966
138	846	B	11	2	13	94.13	107.63	92.352	1.449	-0.50661
138	846	B	11	2	14.6	94.15	107.65	92.3713	1.458	0.91926
138	846	B	11	2	17.1	94.17	107.67	92.3905	1.403	0.47943
138	846	B	11	2	18	94.18	107.68	92.4002	1.464	0.33923
138	846	B	11	2	18.6	94.19	107.69	92.4099	1.457	0.85312
138	846	B	11	2	20.7	94.21	107.71	92.4293	1.401	1.0153
138	846	B	11	2	23	94.23	107.73	92.4486	1.541	0.68394
138	846	B	11	2	24.5	94.24	107.74	92.4583	1.469	0.47758
138	846	B	11	2	26.9	94.27	107.77	92.4874	1.459	1.03
138	846	B	11	2	28.4	94.28	107.78	92.4971	1.456	0.72058
138	846	B	11	2	30.7	94.31	107.81	92.5259	1.451	0.036423
138	846	B	11	2	33	94.33	107.83	92.545	1.518	0.2908
138	846	B	11	2	34.5	94.35	107.85	92.5641	1.476	1.6136
138	846	B	11	2	36.8	94.37	107.87	92.5833	1.409	1.2389
138	846	B	11	2	38.3	94.38	107.88	92.5928	1.4725	0.46575
138	846	B	11	2	40.6	94.41	107.91	92.6212	1.408	1.2866
138	846	B	11	2	43	94.43	107.93	92.64	1.464	0.35596
138	846	B	11	2	44.5	94.44	107.94	92.6493	1.4776	1.1557
138	846	B	11	2	46.8	94.47	107.97	92.6773	1.493	1.1061
138	846	B	11	2	48.3	94.48	107.98	92.6866	1.447	0.63124
138	846	B	11	2	50.6	94.51	108.01	92.7145	1.4938	0.7796
138	846	B	11	2	53	94.53	108.03	92.7332	1.502	0.4645
138	846	B	11	2	54.5	94.54	108.04	92.7425	1.485	0.8927
138	846	B	11	2	56.8	94.57	108.07	92.7705	1.4457	0.64785
138	846	B	11	2	58.2	94.58	108.08	92.7798	1.464	0.41708
138	846	B	11	2	60.6	94.61	108.11	92.8078	1.5058	1.0698
138	846	B	11	2	63	94.63	108.13	92.8244	1.499	0.7683
138	846	B	11	2	64.3	94.64	108.14	92.8327	1.493	0.027716
138	846	B	11	2	66.6	94.67	108.17	92.8574	1.5303	0.58013
138	846	B	11	2	68	94.68	108.18	92.8657	1.562	0.94324
138	846	B	11	2	70.4	94.7	108.2	92.8822	1.4915	0.27019
138	846	B	11	2	73	94.73	108.23	92.907	1.497	0.88769
138	846	B	11	2	74.2	94.74	108.24	92.9153	1.465	0.74099
138	846	B	11	2	76.5	94.76	108.26	92.9318	1.5197	0.64284
138	846	B	11	2	78	94.78	108.28	92.9484	1.48	0.71282
138	846	B	11	2	80.3	94.8	108.3	92.965	1.5192	0.83703
138	846	B	11	2	83	94.83	108.33	92.9898	1.522	0.26405
138	846	B	11	2	84.1	94.84	108.34	92.9981	1.482	0.80343
138	846	B	11	2	86.4	94.86	108.36	93.0146	1.4825	0.86799
138	846	B	11	2	88	94.88	108.38	93.0312	1.513	0.90543
138	846	B	11	2	90.2	94.9	108.4	93.0477	1.5163	0.6066
138	846	B	11	2	93	94.93	108.43	93.0726	1.474	0.50547
138	846	B	11	2	94	94.94	108.44	93.0808	1.532	0.052342
138	846	B	11	2	96.3	94.96	108.46	93.0974	1.4905	0.60502
138	846	B	11	2	98	94.98	108.48	93.114	1.515	1.0031
138	846	B	11	2	100.1	95	108.5	93.1305	1.5087	-0.40482
138	846	B	11	2	102.4	95.02	108.52	93.1471	1.511	1.5309
138	846	B	11	2	103	95.03	108.53	93.1553	1.5	0.7073
138	846	B	11	2	103.9	95.04	108.54	93.1636	1.5288	0.11479
138	846	B	11	2	106.2	95.06	108.56	93.1802	1.558	1.6274
138	846	B	11	2	108	95.08	108.58	93.1967	1.522	0.49338
138	846	B	11	2	110	95.1	108.6	93.2133	1.5412	0.1132
138	846	B	11	2	112.3	95.12	108.62	93.2298	1.58	0.73096
138	846	B	11	2	114.6	95.15	108.65	93.2547	1.56	0.046801
138	846	B	11	2	117	95.17	108.67	93.2712	1.5493	0.19271
138	846	B	11	2	119.3	95.19	108.69	93.2878	1.499	-0.70271
138	846	B	11	2	121.6	95.22	108.72	93.3126	1.537	0.28902
138	846	B	11	2	124	95.24	108.74	93.3292	1.5907	0.17459
138	846	B	11	2	126.3	95.26	108.76	93.3457	1.588	-0.7371
138	846	B	11	2	128.7	95.29	108.79	93.3706	1.5458	1.54
138	846	B	11	2	131	95.31	108.81	93.3871	1.423	0.36799
138	846	B	11	2	133.3	95.33	108.83	93.4037	1.514	0.20476
138	846	B	11	2	135.7	95.36	108.86	93.4285	1.5603	0.15516
138	846	B	11	2	138	95.38	108.88	93.4451	1.554	0.073274
138	846	B	11	2	140.3	95.4	108.9	93.4616	1.5642	1.1629
138	846	B	11	2	142.7	95.43	108.93	93.4864	1.561	0.47872
138	846	B	11	2	145	95.45	108.95	93.503	1.54	-0.61194
138	846	B	11	3	3	95.53	109.03	93.5692	1.5508	0.41914
138	846	B	11	3	4.9	95.55	109.05	93.5858	1.583	-0.63085
138	846	B	11	3	7.1	95.57	109.07	93.6023	1.5243	0.27978
138	846	B	11	3	8	95.58	109.08	93.6106	1.474	0.5008
138	846	B	11	3	8.6	95.59	109.09	93.6189	1.567	0.7511
138	846	B	11	3	11	95.61	109.11	93.6354	1.543	0.002123
138	846	B	11	3	13	95.63	109.13	93.652	1.503	0.76361
138	846	B	11	3	14.7	95.65	109.15	93.6686	1.503	0.89596
138	846	B	11	3	17.2	95.67	109.17	93.6851	1.495	0.61883
138	846	B	11	3	18.2	95.68	109.18	93.6934	1.482	-0.021418
138	846	B	11	3	20.3	95.7	109.2	93.7099	1.481	0.27635
138	846	B	11	3	23	95.73	109.23	93.7345	1.482	0.95622
138	846	B	11	3	24.3	95.74	109.24	93.7428	1.428	0.84477
138	846	B	11	3	26.5	95.76	109.26	93.7592	1.445	0.74662
138	846	B	11	3	28.1	95.78	109.28	93.7756	1.413	1.3535
138	846	B	11	3	30.5	95.81	109.31	93.8003	1.396	1.868
138	846	B	11	3	33	95.83	109.33	93.8172	1.456	0.72037
138	846	B	11	3	34.1	95.84	109.34	93.8257	1.42	0.80959
138	846	B	11	3	36.6	95.87	109.37	93.8512	1.4448	0.28814
138	846	B	11	3	38	95.88	109.38	93.8605	1.469	1.1773
138	846	B	11	3	40.3	95.9	109.4	93.8795	1.417	0.5314
138	846	B	11	3	43	95.93	109.43	93.9089	1.4565	1.1679
138	846	B	11	3	44.2	95.94	109.44	93.9188	1.455	1.2137
138	846	B	11	3	46.4	95.96	109.46	93.9388	1.4165	0.56236
138	846	B	11	3	48	95.98	109.48	93.9587	1.457	0.56997
138	846	B	11	3	50.3	96	109.5	93.9786	1.43	1.0657
138	846	B	11	3	53	96.03	109.53	94.0085	1.4462	1.1191
138	846	B	11	3	54	96.04	109.54	94.0184	1.4	0.43009
138	846	B	11	3	56.4	96.06	109.56	94.0384	1.3745	1.3733
138	846	B	11	3	58	96.08	109.58	94.0583	1.401	0.6975
138	846	B	11	3	60.3	96.1	109.6	94.0782	1.425	1.0956
138	846	B	11	3	63	96.13	109.63	94.1082	1.403	0.99176
138	846	B	11	3	63.7	96.14	109.64	94.1182	1.38	1.0295
138	846	B	11	3	66.1	96.16	109.66	94.1382	1.3853	0.84996
138	846	B	11	3	68	96.18	109.68	94.1581	1.331	1.3186
138	846	B	11	3	69.8	96.2	109.7	94.1781	1.422	1.7926
138	846	B	11	3	72.3	96.22	109.72	94.1981	1.376	1.2063
138	846	B	11	3	73	96.23	109.73	94.2081	1.403	1.5185
138	846	B	11	3	73.7	96.24	109.74	94.2181	1.3937	2.1495
138	846	B	11	3	75.9	96.26	109.76	94.2381	1.369	1.8236
138	846	B	11	3	78	96.28	109.78	94.2581	1.418	1.6495
138	846	B	11	3	79.7	96.3	109.8	94.2781	1.3803	0.82999
138	846	B	11	3	82.1	96.32	109.82	94.2981	1.444	1.4478
138	846	B	11	3	83.4	96.33	109.83	94.3081	1.383	2.3207
138	846	B	11	3	85.9	96.36	109.86	94.3381	1.3804	2.2765
138	846	B	11	3	88	96.38	109.88	94.3581	1.412	1.5899
138	846	B	11	3	89.6	96.4	109.9	94.3781	1.362	-0.40922
138	846	B	11	3	92	96.42	109.92	94.398	1.422	1.0709
138	846	B	11	3	93.5	96.43	109.93	94.408	1.304	1.8245
138	846	B	11	3	95.7	96.46	109.96	94.4379	1.495	1.7207
138	846	B	11	3	98	96.48	109.98	94.4578	1.4516	1.8856
138	846	B	11	3	99.6	96.5	110	94.4777	1.505	1.8335
138	846	B	11	3	101.8	96.52	110.02	94.4976	1.456	1.4913
138	846	B	11	3	103.2	96.53	110.03	94.5076	1.5167	1.6673
138	846	B	11	3	105.7	96.56	110.06	94.5375	1.454	2.1899
138	846	B	11	3	108	96.58	110.08	94.5574	1.503	1.234
138	846	B	11	3	111.6	96.62	110.12	94.5974	1.5042	0.41478
138	846	B	11	3	114	96.64	110.14	94.6173	1.566	1.9274
138	846	B	11	3	116.3	96.66	110.16	94.6373	1.536	1.5364
138	846	B	11	3	118.7	96.69	110.19	94.6673	1.5277	0.88479
138	846	B	11	3	121	96.71	110.21	94.6873	1.512	0.88426
138	846	B	11	3	123.3	96.73	110.23	94.7073	1.528	0.75357
138	846	B	11	3	125.7	96.76	110.26	94.7373	1.5163	0.54126
138	846	B	11	3	128	96.78	110.28	94.7573	1.506	0.52446
138	846	B	11	3	130.3	96.8	110.3	94.7773	1.515	0.5402
138	846	B	11	3	132.7	96.83	110.33	94.8073	1.517	-0.33921
138	846	B	11	3	135	96.85	110.35	94.8273	1.579	-0.063135
138	846	B	11	3	137.3	96.87	110.37	94.8473	1.5622	-0.58433
138	846	B	11	3	139.7	96.9	110.4	94.8766	1.522	-0.86172
138	846	B	11	3	142	96.92	110.42	94.8961	1.5673	0.114
138	846	B	11	3	144.3	96.94	110.44	94.9156	1.566	-0.47228
138	846	B	11	4	3	97.03	110.53	95.0032	1.575	-0.070596
138	846	B	11	4	4.7	97.05	110.55	95.0226	1.5608	0.32209
138	846	B	11	4	6.9	97.07	110.57	95.0421	1.571	-0.52452
138	846	B	11	4	8.2	97.08	110.58	95.0518	1.601	0.11791
138	846	B	11	4	10.6	97.11	110.61	95.081	1.5314	0.092712
138	846	B	11	4	13	97.13	110.63	95.1004	1.534	-0.53424
138	846	B	11	4	14.3	97.14	110.64	95.1101	1.524	0.12446
138	846	B	11	4	16.7	97.17	110.67	95.1391	1.569	-0.31564
138	846	B	11	4	18	97.18	110.68	95.1485	1.583	-0.05286
138	846	B	11	4	20.5	97.2	110.7	95.1673	1.501	-0.80455
138	846	B	11	4	23	97.23	110.73	95.1955	1.489	-1.2202
138	846	B	11	4	24.2	97.24	110.74	95.2049	1.496	-0.78934
138	846	B	11	4	26.6	97.27	110.77	95.2327	1.465	-0.39963
138	846	B	11	4	28	97.28	110.78	95.2416	1.555	-0.75785
138	846	B	11	4	30.1	97.3	110.8	95.2594	1.503	-1.1326
138	846	B	11	4	33	97.33	110.83	95.2861	1.538	-1.0466
138	846	B	11	4	34	97.34	110.84	95.295	1.482	-1.9309
138	846	B	11	4	36.2	97.36	110.86	95.3129	1.512	-0.45082
138	846	B	11	4	38	97.38	110.88	95.3309	1.465	-1.1998
138	846	B	11	4	40	97.4	110.9	95.3489	1.418	-0.76102
138	846	B	11	4	43	97.43	110.93	95.3759	1.459	-0.91367
138	846	B	11	4	43.9	97.44	110.94	95.3849	1.541	-1.3153
138	846	B	11	4	46.1	97.46	110.96	95.4028	1.5314	-0.51854
138	846	B	11	4	48	97.48	110.98	95.4204	1.46	-1.1319
138	846	B	11	4	50	97.5	111	95.4381	1.485	-0.096556
138	846	B	11	4	52.2	97.52	111.02	95.4557	1.482	-1.0896
138	846	B	11	4	53	97.53	111.03	95.4645	1.555	-1.1322
138	846	B	11	4	53.6	97.54	111.04	95.4733	1.4903	-0.61827
138	846	B	11	4	56.1	97.56	111.06	95.4905	1.518	-1.4323
138	846	B	11	4	58	97.58	111.08	95.507	1.544	-0.45662
138	846	B	11	4	59.9	97.6	111.1	95.5236	1.4893	-2.3771
138	846	B	11	4	62.1	97.62	111.12	95.5402	1.518	0.73008
138	846	B	11	4	63	97.63	111.13	95.5485	1.5167	0.023672
138	846	B	11	4	63.6	97.64	111.14	95.5568	1.476	0.89226
138	846	B	11	4	66.1	97.66	111.16	95.5733	1.465	0.094471
138	846	B	11	4	68	97.68	111.18	95.5899	1.4633	1.081
138	846	B	11	4	69.5	97.69	111.19	95.5982	1.463	0.061138
138	846	B	11	4	71.9	97.72	111.22	95.623	1.466	0.85761
138	846	B	11	4	73	97.73	111.23	95.6313	1.459	0.87687
138	846	B	11	4	73.5	97.74	111.24	95.6396	1.475	1.8821
138	846	B	11	4	75.5	97.75	111.25	95.6479	1.4628	1.3938
138	846	B	11	4	78	97.78	111.28	95.673	1.442	1.2574
138	846	B	11	4	79.4	97.79	111.29	95.6814	1.4858	1.0022
138	846	B	11	4	81.8	97.82	111.32	95.7067	1.455	1.2617
138	846	B	11	4	83.3	97.83	111.33	95.7151	1.506	1.0717
138	846	B	11	4	85.4	97.85	111.35	95.7325	1.4747	0.90299
138	846	B	11	4	88	97.88	111.38	95.7594	1.457	1.0486
138	846	B	11	4	89.4	97.89	111.39	95.7683	1.496	1.0809
138	846	B	11	4	91.6	97.92	111.42	95.7952	1.466	2.0889
138	846	B	11	4	93	97.93	111.43	95.8041	1.411	1.8148
138	846	B	11	4	95.3	97.95	111.45	95.822	1.497	1.1607
138	846	B	11	4	98	97.98	111.48	95.8488	1.4695	1.8975
138	846	B	11	4	99	97.99	111.49	95.8578	1.45	1.8755
138	846	B	11	4	101.2	98.01	111.51	95.8757	1.4582	2.0215
138	846	B	11	4	103	98.03	111.53	95.8936	1.461	1.7904
138	846	B	11	4	105.2	98.05	111.55	95.9117	1.475	1.9553
138	846	B	11	4	107.3	98.07	111.57	95.9298	1.4508	2.4429
138	846	B	11	4	108	98.08	111.58	95.9389	1.46	1.3102
138	846	B	11	4	108.8	98.09	111.59	95.9479	1.487	1.3522
138	846	B	11	4	111.3	98.11	111.61	95.966	1.446	1.189
138	846	B	11	4	113.5	98.13	111.63	95.9842	1.467	1.9207
138	846	B	11	4	115.9	98.16	111.66	96.0116	1.44	2.1477
138	846	B	11	4	118.1	98.18	111.68	96.0299	1.4567	0.81293
138	846	B	11	4	120.6	98.21	111.71	96.0573	1.474	0.61689
138	846	B	11	4	122.8	98.23	111.73	96.076	1.445	0.73026
138	846	B	11	4	125.3	98.25	111.75	96.0949	1.4523	0.22534
138	846	B	11	4	127.5	98.28	111.78	96.1233	1.451	1.6889
138	846	B	11	4	129.8	98.3	111.8	96.1422	1.4725	0.84231
138	846	B	11	4	132.3	98.32	111.82	96.1614	1.413	1.4113
138	846	B	11	4	134.5	98.35	111.85	96.1911	1.426	0.4993
138	846	B	11	4	137	98.37	111.87	96.2109	1.4553	0.9869
138	846	B	11	4	139.2	98.39	111.89	96.2307	1.51	0.22165
138	846	B	11	4	141.7	98.42	111.92	96.2604	1.4678	-0.54387
138	846	B	11	4	143.9	98.44	111.94	96.2802	1.516	0.1227
138	846	B	11	5	2.4	98.52	112.02	96.3593	1.489	1.4548
138	846	B	11	5	3	98.53	112.03	96.3692	1.467	1.2983
138	846	B	11	5	4.5	98.54	112.04	96.3791	1.469	0.13634
138	846	B	11	5	6.7	98.57	112.07	96.4088	1.4685	0.54231
138	846	B	11	5	8.2	98.58	112.08	96.4187	1.46	0.49324
138	846	B	11	5	10.7	98.61	112.11	96.4484	1.486	1.6802
138	846	B	11	5	13	98.63	112.13	96.4681	1.491	0.62751
138	846	B	11	5	14.3	98.64	112.14	96.478	1.445	1.0774
138	846	B	11	5	16.8	98.67	112.17	96.5076	1.46	1.4996
138	846	B	11	5	18.2	98.68	112.18	96.5175	1.476	0.60992
138	846	B	11	5	20.4	98.7	112.2	96.5372	1.489	1.0758
138	846	B	11	5	23	98.73	112.23	96.5668	1.491	1.0533
138	846	B	11	5	24.3	98.74	112.24	96.5767	1.511	0.39139
138	846	B	11	5	26.6	98.77	112.27	96.6063	1.481	0.21162
138	846	B	11	5	28	98.78	112.28	96.6162	1.441	0.18424
138	846	B	11	5	30.3	98.8	112.3	96.6359	1.547	0.17829
138	846	B	11	5	33	98.83	112.33	96.6655	1.519	0.22631
138	846	B	11	5	34.2	98.84	112.34	96.6754	1.493	0.11215
138	846	B	11	5	36.3	98.86	112.36	96.6951	1.575	0.37195
138	846	B	11	5	38	98.88	112.38	96.7149	1.512	0.17347
138	846	B	11	5	40.3	98.9	112.4	96.7341	1.5387	-0.16604
138	846	B	11	5	43	98.93	112.43	96.7628	1.5	0.54637
138	846	B	11	5	43.9	98.94	112.44	96.7723	1.539	0.044428
138	846	B	11	5	46.4	98.96	112.46	96.7915	1.5058	0.87371
138	846	B	11	5	48	98.98	112.48	96.8104	1.493	0.36336
138	846	B	11	5	50	99	112.5	96.8284	1.488	0.075387
138	846	B	11	5	52.4	99.02	112.52	96.8462	1.479	0.70942
138	846	B	11	5	53	99.03	112.53	96.8551	1.502	0.22103
138	846	B	11	5	53.9	99.04	112.54	96.8639	1.4727	-0.67412
138	846	B	11	5	56.4	99.06	112.56	96.8816	1.477	0.72463
138	846	B	11	5	58	99.08	112.58	96.8989	1.4933	0.27666
138	846	B	11	5	60	99.1	112.6	96.9155	1.482	-0.041147
138	846	B	11	5	63	99.13	112.63	96.9404	1.435	0.090939
138	846	B	11	5	63.9	99.14	112.64	96.9487	1.4675	0.13678
138	846	B	11	5	66.1	99.16	112.66	96.9653	1.457	0.36404
138	846	B	11	5	68	99.18	112.68	96.9819	1.457	-0.029699
138	846	B	11	5	69.8	99.2	112.7	96.9985	1.4456	0.11892
138	846	B	11	5	72.3	99.22	112.72	97.0151	1.479	0.5577
138	846	B	11	5	73	99.23	112.73	97.0234	1.429	-0.10966
138	846	B	11	5	73.8	99.24	112.74	97.0317	1.4052	0.23176
138	846	B	11	5	75.9	99.26	112.76	97.0483	1.442	-0.20808
138	846	B	11	5	78	99.28	112.78	97.0649	1.491	0.062576
138	846	B	11	5	79.9	99.3	112.8	97.0815	1.452	0.34407
138	846	B	11	5	82.1	99.32	112.82	97.0981	1.337	-0.1283
138	846	B	11	5	83.5	99.33	112.83	97.1064	1.432	-0.0092501
138	846	B	11	5	86	99.36	112.86	97.1313	1.4408	-0.031736
138	846	B	11	5	88	99.38	112.88	97.1479	1.431	0.31756
138	846	B	11	5	89.6	99.4	112.9	97.1645	1.429	-0.65108
138	846	B	11	5	92	99.42	112.92	97.1811	1.4217	-0.44009
138	846	B	11	5	93.5	99.43	112.93	97.1894	1.48	0.036924
138	846	B	11	5	95.9	99.46	112.96	97.2143	1.4265	0.9256
138	846	B	11	5	98	99.48	112.98	97.2309	1.4	0.23899
138	846	B	11	5	99.6	99.5	113	97.2475	1.409	1.0222
138	846	B	11	5	102	99.52	113.02	97.2641	1.4227	0.58233
138	846	B	11	5	103.5	99.53	113.03	97.2724	1.349	0.22411
138	846	B	11	5	105.7	99.56	113.06	97.2973	1.4007	0.25586
138	846	B	11	5	108	99.58	113.08	97.3139	1.345	0.2472
138	846	B	11	5	109.5	99.6	113.1	97.3305	1.449	0.10837
138	846	B	11	5	111.9	99.62	113.12	97.3471	1.4105	0.53088
138	846	B	11	5	114.1	99.64	113.14	97.3637	1.413	0.6117
138	846	B	11	5	116.6	99.67	113.17	97.3879	1.3973	-0.13754
138	846	B	11	5	118.8	99.69	113.19	97.4039	1.38	0.10599
138	846	B	11	5	121.3	99.71	113.21	97.4199	1.401	0.3658
138	846	B	11	5	123.5	99.74	113.24	97.4438	1.4063	0.57652
138	846	B	11	5	125.9	99.76	113.26	97.4598	1.452	0.60854
138	846	B	11	5	128.2	99.78	113.28	97.4758	1.441	0.93343
138	846	B	11	5	130.6	99.81	113.31	97.4998	1.41	0.44451
138	846	B	11	5	132.8	99.83	113.33	97.5158	1.385	-0.20684
138	846	B	11	5	135.3	99.85	113.35	97.5318	1.403	1.5173
138	846	B	11	5	137.5	99.88	113.38	97.5558	1.4105	1.061
138	846	B	11	5	140	99.9	113.4	97.5718	1.424	0.63739
138	846	B	11	5	142.2	99.92	113.42	97.5885	1.411	1.9711
138	846	B	11	5	144.6	99.95	113.45	97.6125	1.4362	0.94521
138	846	B	11	6	3	100.03	113.53	97.6765	1.431	1.377
138	846	B	11	6	4.6	100.05	113.55	97.6925	1.462	0.74732
138	846	B	11	6	7	100.07	113.57	97.7085	1.369	1.3814
138	846	B	11	6	8.5	100.08	113.58	97.7165	1.352	0.84144
138	846	B	11	6	10.8	100.11	113.61	97.7405	1.352	0.63185
138	846	B	11	6	13	100.13	113.63	97.7572	1.437	0.54996
138	846	B	11	6	14.5	100.14	113.64	97.7652	1.403	0.40326
138	846	B	11	6	16.9	100.17	113.67	97.7892	1.375	0.7767
138	846	B	11	6	18.4	100.18	113.68	97.7972	1.397	0.29916
138	846	B	11	6	20.7	100.21	113.71	97.8212	1.394	0.36888
138	846	B	11	6	23	100.23	113.73	97.8372	1.423	0.6341
138	846	B	11	6	24.5	100.24	113.74	97.845	1.422	0.44944
138	846	B	11	6	26.8	100.27	113.77	97.8683	1.428	-0.31608
138	846	B	11	6	28	100.28	113.78	97.8761	1.439	0.21246
138	846	B	11	6	30	100.3	113.8	97.8916	1.458	0.041087
138	846	B	11	6	32.3	100.32	113.82	97.9071	1.493	0.040559
138	846	B	11	6	33	100.33	113.83	97.9149	1.506	-0.14519
138	846	B	11	6	33.8	100.34	113.84	97.9226	1.5303	0.39799
138	846	B	11	6	36.1	100.36	113.86	97.9382	1.484	-0.41608
138	846	B	11	6	38	100.38	113.88	97.9537	1.485	-0.80439
138	846	B	11	6	39.9	100.4	113.9	97.9692	1.5034	-0.20561
138	846	B	11	6	42.2	100.42	113.92	97.9847	1.468	0.59112
138	846	B	11	6	43	100.43	113.93	97.9925	1.451	-0.043697
138	846	B	11	6	43.7	100.44	113.94	98.0003	1.5115	-1.9151
138	846	B	11	6	46	100.46	113.96	98.0158	1.569	-0.3699
138	846	B	11	6	48	100.48	113.98	98.0315	1.491	-0.22671
138	846	B	11	6	49.8	100.5	114	98.0472	1.5158	-0.38723
138	846	B	11	6	52.2	100.52	114.02	98.0629	1.538	-0.4203
138	846	B	11	6	53.5	100.53	114.03	98.0708	1.539	-0.53988
138	846	B	11	6	55.8	100.56	114.06	98.0945	1.5366	0.40845
138	846	B	11	6	58	100.58	114.08	98.1125	1.471	-0.46256
138	846	B	11	6	59.6	100.6	114.1	98.1306	1.522	-0.89426
138	846	B	11	6	61.9	100.62	114.12	98.1486	1.5095	-0.74835
138	846	B	11	6	63.5	100.63	114.13	98.1577	1.514	-0.52625
138	846	B	11	6	65.7	100.66	114.16	98.1848	1.497	-1.7256
138	846	B	11	6	68	100.68	114.18	98.203	1.5122	-0.88552
138	846	B	11	6	69.5	100.69	114.19	98.2121	1.507	-1.7915
138	846	B	11	6	71.8	100.72	114.22	98.2395	1.474	-0.10016
138	846	B	11	6	73.4	100.73	114.23	98.2487	1.444	-0.72685
138	846	B	11	6	75.6	100.76	114.26	98.2761	1.477	-0.68696
138	846	B	11	6	78	100.78	114.28	98.2943	1.482	-0.9424
138	846	B	11	6	79	100.79	114.29	98.3035	1.442	-1.2247
138	846	B	11	6	81.3	100.81	114.31	98.3217	1.431	-0.88353
138	846	B	11	6	83	100.83	114.33	98.34	1.405	-0.79728
138	846	B	11	6	85	100.85	114.35	98.3583	1.485	-0.054778
138	846	B	11	6	87.4	100.87	114.37	98.3765	1.437	-0.23428
138	846	B	11	6	88	100.88	114.38	98.3853	1.485	-0.73894
138	846	B	11	6	88.8	100.89	114.39	98.3941	1.456	-1.146
138	846	B	11	6	91.2	100.91	114.41	98.4115	1.464	-0.85363
138	846	B	11	6	93	100.93	114.43	98.4289	1.451	-0.73212
138	846	B	11	6	94.9	100.95	114.45	98.4464	1.391	-0.513
138	846	B	11	6	97.3	100.97	114.47	98.4638	1.426	-0.72504
138	846	B	11	6	98	100.98	114.48	98.4722	1.468	-0.31529
138	846	B	11	6	98.7	100.99	114.49	98.4804	1.4113	-0.40016
138	846	B	11	6	101.1	101.01	114.51	98.4969	1.436	0.10371
138	846	B	11	6	103.4	101.03	114.53	98.5134	1.454	-1.41
138	846	B	11	6	105.8	101.06	114.56	98.5382	1.4592	-1.6874
138	846	B	11	6	108.1	101.08	114.58	98.5547	1.422	-1.6879
138	846	B	11	6	110.4	101.1	114.6	98.5713	1.4465	-0.30543
138	846	B	11	6	112.7	101.13	114.63	98.5961	1.393	-0.85943
138	846	B	11	6	115.1	101.15	114.65	98.6127	1.417	-1.3155
138	846	B	11	6	117.4	101.17	114.67	98.6292	1.4433	-0.95811
138	846	B	11	6	119.8	101.2	114.7	98.6529	1.474	-1.0077
138	846	B	11	6	122.1	101.22	114.72	98.6682	1.446	-0.53639
138	846	B	11	6	124.4	101.24	114.74	98.6835	1.514	-0.55319
138	846	B	11	6	126.8	101.27	114.77	98.7064	1.437	-0.45636
138	846	B	11	6	129.1	101.29	114.79	98.7217	1.448	-0.27791
138	846	B	11	6	131.4	101.31	114.81	98.737	1.429	0.030709
138	846	B	11	6	133.8	101.34	114.84	98.76	1.4248	0.59939
138	846	B	11	6	136.1	101.36	114.86	98.7752	1.445	0.81038
138	846	B	11	7	3	101.43	114.93	98.8286	1.4483	1.2045
138	846	B	11	7	4.8	101.45	114.95	98.8439	1.494	0.45005
138	846	B	11	7	7	101.47	114.97	98.8592	1.4723	0.4658
138	846	B	11	7	8	101.48	114.98	98.8668	1.47	0.76491
138	846	B	11	7	8.5	101.49	114.99	98.8744	1.439	0.18867
138	846	B	11	7	11	101.51	115.01	98.8897	1.4643	-0.088463
138	846	B	11	7	13	101.53	115.03	98.9049	1.463	0.89539
138	846	B	11	7	14	101.54	115.04	98.9125	1.522	1.8307
138	846	B	11	7	16.5	101.56	115.06	98.9277	1.4264	0.56105
138	846	B	11	7	18	101.58	115.08	98.9429	1.458	0.96457
138	846	B	11	7	19.8	101.6	115.1	98.9581	1.407	1.3247
138	846	B	11	7	22.3	101.62	115.12	98.9731	1.4443	1.3405
138	846	B	11	7	23	101.63	115.13	98.9806	1.5	1.3011
138	846	B	11	7	23.8	101.64	115.14	98.9881	1.485	0.23352
138	846	B	11	7	26	101.66	115.16	99.0032	1.466	1.0628
138	846	B	11	7	28	101.68	115.18	99.0182	1.418	0.85889
138	846	B	11	7	29.1	101.69	115.19	99.0257	1.447	0.93184
138	846	B	11	7	31.6	101.72	115.22	99.0483	1.4435	0.65445
138	846	B	11	7	33.2	101.73	115.23	99.0558	1.421	0.90096
138	846	B	11	7	35.4	101.75	115.25	99.0708	1.455	0.81636
138	846	B	11	7	37.8	101.78	115.28	99.0934	1.4506	0.27864
138	846	B	11	7	40	101.8	115.3	99.1084	1.439	-0.21001
138	846	B	11	7	42.6	101.83	115.33	99.131	1.425	0.32613
138	846	B	11	7	44.6	101.85	115.35	99.1461	1.4668	0.40696
138	846	B	11	7	47.1	101.87	115.37	99.1611	1.526	-0.2444
138	846	B	11	7	49.3	101.89	115.39	99.1761	1.51	-0.4239
138	846	B	11	7	51.8	101.92	115.42	99.1986	1.456	-0.84773
138	846	B	11	7	54	101.94	115.44	99.2134	1.388	0.4534
138	846	B	11	7	56.5	101.96	115.46	99.2282	1.449	-0.32813
138	846	B	11	7	58.7	101.99	115.49	99.2503	1.501	0.45208
138	846	B	11	7	61.1	102.01	115.51	99.2651	1.444	-0.020301
138	846	B	11	7	63.3	102.03	115.53	99.2798	1.446	0.10934
138	846	B	11	7	65.8	102.06	115.56	99.302	1.462	-0.10297
138	846	D	11	5	47.6	103.28	115.68	99.31	1.445	0.2682
138	846	B	11	7	68	102.08	115.58	99.3168	1.48	-1.0797
138	846	D	11	5	50.1	103.3	115.7	99.3254	1.456	-0.100154
138	846	B	11	7	70.4	102.1	115.6	99.3315	1.42	-0.5108
138	846	D	11	5	52.3	103.32	115.72	99.3408	1.511	0.604209
138	846	D	11	5	53	103.33	115.73	99.3486	1.502	-0.192949
138	846	B	11	7	72.6	102.13	115.63	99.3536	1.483	0.17178
138	846	D	11	5	53.8	103.34	115.74	99.3562	1.4745	-0.193231
138	846	D	11	5	56.3	103.36	115.76	99.3715	1.456	0.511131
138	846	D	11	5	58.4	103.38	115.78	99.3868	1.45	0.418643
138	846	D	11	5	60.9	103.41	115.81	99.4098	1.4426	0.648474
138	846	D	11	5	63	103.43	115.83	99.425	1.437	0.540259
138	846	D	11	5	64.7	103.45	115.85	99.4402	1.398	0.954915
138	846	D	11	5	67	103.47	115.87	99.4553	1.4418	0.0470069
138	846	D	11	5	69.2	103.49	115.89	99.4704	1.402	0.477037
138	846	D	11	5	71.7	103.52	115.92	99.4931	1.393	-0.261983
138	846	D	11	5	73	103.53	115.93	99.5007	1.423	-0.123859
138	846	D	11	5	75.3	103.55	115.95	99.5158	1.45	0.0447394
138	846	D	11	5	77.7	103.58	115.98	99.5385	1.425	0.981985
138	846	D	11	5	79.9	103.6	116	99.5536	1.3984	-0.679467
138	846	D	11	5	82.4	103.62	116.02	99.5687	1.427	0.304186
138	846	D	11	5	83	103.63	116.03	99.5762	1.471	-0.142074
138	846	D	11	5	83.9	103.64	116.04	99.5837	1.4193	0.211347
138	846	D	11	5	86	103.66	116.06	99.5986	1.406	-0.204443
138	846	D	11	5	88.5	103.68	116.08	99.6134	1.419	0.487037
138	846	D	11	5	90.7	103.71	116.11	99.6358	1.4587	-0.298123
138	846	D	11	5	93	103.73	116.13	99.6507	1.356	-0.00649926
138	846	D	11	5	94.5	103.74	116.14	99.6581	1.4177	-0.114433
138	846	D	11	5	96.7	103.77	116.17	99.6803	1.42	0.0692601
138	846	D	11	5	99.3	103.79	116.19	99.6952	1.46	-0.17736
138	846	D	11	5	101.4	103.81	116.21	99.71	1.453	-0.39323
138	846	D	11	5	103	103.83	116.23	99.7249	1.414	-0.00933362
138	846	D	11	5	105.3	103.85	116.25	99.7393	1.42	-0.378988
138	846	D	11	5	107.5	103.88	116.28	99.7608	1.416	0.742804
138	846	D	11	5	109.9	103.9	116.3	99.7752	1.454	0.58845
138	846	D	11	5	112.1	103.92	116.32	99.7896	1.4227	0.403344
138	846	D	11	5	114.6	103.95	116.35	99.8112	1.402	0.279461
138	846	D	11	5	116.8	103.97	116.37	99.8257	1.4465	0.325027
138	846	D	11	5	119.3	103.99	116.39	99.8401	1.395	-0.690525
138	846	D	11	5	121.5	104.01	116.41	99.8545	1.441	0.323893
138	846	D	11	5	123.8	104.04	116.44	99.8761	1.4557	-0.107558
138	846	D	11	5	126.3	104.06	116.46	99.8906	1.419	-0.677136
138	846	D	11	5	128.5	104.08	116.48	99.9051	1.4405	0.275779
138	846	D	11	5	130.9	104.11	116.51	99.9268	1.439	0.843936
138	846	D	11	5	133.1	104.13	116.53	99.9413	1.473	-0.4023
138	846	D	11	5	135.6	104.16	116.56	99.9629	1.4573	0.0428274
138	846	D	11	5	137.8	104.18	116.58	99.9773	1.467	-0.803567
138	846	D	11	5	140.3	104.2	116.6	99.9917	1.42	-0.158227
138	846	D	11	5	142.5	104.22	116.62	100.006	1.4636	-0.666296
138	846	D	11	5	145	104.25	116.65	100.028	1.454	-0.0366173
138	846	D	11	6	3	104.33	116.73	100.085	1.417	0.376338
138	846	D	11	6	4.7	104.35	116.75	100.1	1.4727	0.31425
138	846	D	11	6	7.1	104.37	116.77	100.114	1.441	-0.332212
138	846	D	11	6	9.3	104.39	116.79	100.129	1.412	0.205475
138	846	D	11	6	11.8	104.42	116.82	100.15	1.4572	-0.579685
138	846	D	11	6	13.3	104.43	116.83	100.158	1.477	-0.0570985
138	846	D	11	6	15.4	104.45	116.85	100.172	1.443	0.157641
138	846	D	11	6	17.9	104.48	116.88	100.194	1.4242	0.325944
138	846	D	11	6	20.1	104.5	116.9	100.208	1.402	-0.0437038
138	846	D	11	6	23	104.53	116.93	100.23	1.432	0.186125
138	846	D	11	6	24	104.54	116.94	100.237	1.4288	0.0166775
138	846	D	11	6	26.2	104.56	116.96	100.252	1.441	-0.0761619
138	846	D	11	6	28.7	104.59	116.99	100.273	1.456	0.738053
138	846	D	11	6	30.9	104.61	117.01	100.288	1.4495	-0.846509
138	846	D	11	6	33	104.63	117.03	100.302	1.436	-0.477993
138	846	D	11	6	34.8	104.65	117.05	100.317	1.414	0.72097
138	846	D	11	6	37	104.67	117.07	100.332	1.4406	-0.140788
138	846	D	11	6	39.5	104.69	117.09	100.346	1.41	-0.694996
138	846	B	12	1	33	102.33	117.13	100.355	1.453	-0.7898
138	846	D	11	6	41.7	104.72	117.12	100.368	1.446	-0.557431
138	846	B	12	1	34.5	102.35	117.15	100.37	1.407	-0.38899
138	846	D	11	6	43.3	104.73	117.13	100.375	1.49	-0.32704
138	846	B	12	1	37	102.37	117.17	100.386	1.426	-0.096641
138	846	D	11	6	45.5	104.75	117.15	100.39	1.497	0.118375
138	846	B	12	1	38.2	102.38	117.18	100.394	1.434	-0.012839
138	846	B	12	1	40.4	102.4	117.2	100.409	1.426	-0.6181
138	846	B	12	1	43	102.43	117.23	100.433	1.415	-0.22025
138	846	B	12	1	44.3	102.44	117.24	100.441	1.443	-1.091
138	846	B	12	1	46.5	102.46	117.26	100.456	1.407	-0.70103
138	846	B	12	1	48.2	102.48	117.28	100.472	1.403	-0.2731
138	846	B	12	1	50.4	102.5	117.3	100.487	1.462	0.22534
138	846	B	12	1	53	102.53	117.33	100.511	1.345	-0.23103
138	846	B	12	1	54.4	102.54	117.34	100.519	1.404	0.87512
138	846	B	12	1	56.5	102.56	117.36	100.534	1.466	-0.37826
138	846	B	12	1	58.1	102.58	117.38	100.55	1.445	-0.19981
138	846	B	12	1	60.3	102.6	117.4	100.566	1.487	-0.50948
138	846	B	12	1	63	102.63	117.43	100.589	1.4715	-0.57806
138	846	B	12	1	64.2	102.64	117.44	100.597	1.512	-0.2502
138	846	B	12	1	68	102.68	117.48	100.629	1.468	-0.19702
138	846	B	12	1	70.2	102.7	117.5	100.644	1.478	0.54548
138	846	B	12	1	73	102.73	117.53	100.668	1.504	0.19216
138	846	B	12	1	73.9	102.74	117.54	100.676	1.4895	0.15393
138	846	B	12	1	76.3	102.76	117.56	100.692	1.452	-0.35099
138	846	B	12	1	78	102.78	117.58	100.708	1.4393	0.060672
138	846	B	12	1	80	102.8	117.6	100.724	1.487	0.03845
138	846	B	12	1	82.4	102.82	117.62	100.74	1.494	0.99789
138	846	B	12	1	83	102.83	117.63	100.748	1.4683	-0.55785
138	846	B	12	1	83.8	102.84	117.64	100.756	1.459	-0.043959
138	846	B	12	1	86.1	102.86	117.66	100.771	1.491	-0.87429
138	846	B	12	1	88	102.88	117.68	100.787	1.489	-0.26738
138	846	B	12	1	89.9	102.9	117.7	100.803	1.491	0.63783
138	846	B	12	1	92.3	102.92	117.72	100.819	1.5067	0.39324
138	846	B	12	1	93	102.93	117.73	100.827	1.4885	0.083832
138	846	B	12	1	93.7	102.94	117.74	100.835	1.509	-0.69743
138	846	B	12	1	96	102.96	117.76	100.851	1.49	-0.2261
138	846	B	12	1	98	102.98	117.78	100.867	1.524	-0.28358
138	846	B	12	1	99.8	103	117.8	100.883	1.4943	-0.6502
138	846	B	12	1	102.2	103.02	117.82	100.899	1.484	-0.09752
138	846	B	12	1	103	103.03	117.83	100.907	1.4533	-0.16938
138	846	B	12	1	103.6	103.04	117.84	100.915	1.422	-0.35838
138	846	B	12	1	106	103.06	117.86	100.931	1.453	-0.5867
138	846	B	12	1	108	103.08	117.88	100.948	1.4575	0.093434
138	846	B	12	1	109.8	103.1	117.9	100.964	1.426	1.0556
138	846	B	12	1	112.1	103.12	117.92	100.98	1.4457	0.79473
138	846	B	12	1	114.4	103.14	117.94	100.996	1.46	-0.084416
138	846	B	12	1	116.7	103.17	117.97	101.02	1.45	-1.1916
138	846	B	12	1	119.1	103.19	117.99	101.035	1.4033	-0.19963
138	846	B	12	1	121.4	103.21	118.01	101.051	1.367	0.64592
138	846	B	12	1	123.8	103.24	118.04	101.075	1.4132	-0.2823
138	846	B	12	1	126.1	103.26	118.06	101.091	1.387	-0.25029
138	846	B	12	1	128.4	103.28	118.08	101.107	1.405	0.0095149
138	846	B	12	1	130.8	103.31	118.11	101.131	1.3867	-0.26788
138	846	B	12	1	133.1	103.33	118.13	101.147	1.365	0.30107
138	846	B	12	1	135.4	103.35	118.15	101.163	1.426	-0.089956
138	846	B	12	1	137.8	103.38	118.18	101.187	1.395	-0.67649
138	846	B	12	1	140.1	103.4	118.2	101.203	1.387	0.80361
138	846	C	11	5	8	103.58	117.72	101.213	1.414	-0.146744
138	846	B	12	1	142.4	103.42	118.22	101.219	1.426	0.65665
138	846	C	11	5	9.3	103.59	117.73	101.222	1.407	0.431063
138	846	B	12	1	144.8	103.45	118.25	101.243	1.386	0.34671
138	846	C	11	5	11.8	103.62	117.76	101.251	1.405	0.430265
138	846	C	11	5	14	103.64	117.78	101.27	1.358	-0.996559
138	846	C	11	5	16.5	103.67	117.81	101.3	1.3962	-1.02977
138	846	C	11	5	18.7	103.69	117.83	101.32	1.393	-0.0416322
138	846	C	11	5	21.1	103.71	117.85	101.34	1.436	0.5251
138	846	C	11	5	23	103.73	117.87	101.36	1.4164	-0.104829
138	846	C	11	5	24.8	103.75	117.89	101.38	1.425	-0.0432334
138	846	C	11	5	27.3	103.77	117.91	101.4	1.347	0.685576
138	846	C	11	5	29.5	103.79	117.93	101.42	1.386	-0.109132
138	846	C	11	5	31.9	103.82	117.96	101.449	1.416	0.198018
138	846	C	11	5	34.1	103.84	117.98	101.469	1.43	-0.288754
138	846	C	11	5	36.6	103.87	118.01	101.502	1.474	1.33125
138	846	C	11	5	38	103.88	118.02	101.512	1.454	0.282848
138	846	C	11	5	40.3	103.9	118.04	101.533	1.446	-0.452432
138	846	C	11	5	42.7	103.93	118.07	101.566	1.49	-0.35599
138	846	C	11	5	44.9	103.95	118.09	101.59	1.519	0.90768
138	846	C	11	5	47.4	103.97	118.11	101.615	1.446	-0.0977296
138	846	C	11	5	49.6	104	118.14	101.654	1.462	-0.244396
138	846	C	11	5	52	104.02	118.16	101.678	1.455	0.273715
138	846	C	11	5	53.2	104.03	118.17	101.691	1.44	0.192411
138	846	C	11	5	55.7	104.06	118.2	101.728	1.405	0.531966
138	846	C	11	5	57.8	104.08	118.22	101.754	1.432	0.0289963
138	846	C	11	5	60.3	104.1	118.24	101.78	1.4925	-0.149822
138	846	C	11	5	62.5	104.13	118.27	101.817	1.491	0.886672
138	846	C	11	5	65	104.15	118.29	101.843	1.493	-0.475309
138	846	C	11	5	67.2	104.17	118.31	101.868	1.4555	0.561447
138	846	C	11	5	68	104.18	118.32	101.88	1.428	0.441243
138	846	C	11	5	68.6	104.19	118.33	101.893	1.4262	0.593333
138	846	C	11	5	71.1	104.21	118.35	101.919	1.484	0.819711
138	846	C	11	5	73.3	104.23	118.37	101.944	1.436	0.381558
138	846	C	11	5	75.7	104.26	118.4	101.976	1.4618	0.105231
138	846	C	11	5	77.9	104.28	118.42	101.998	1.435	-0.154632
138	846	C	11	5	80.4	104.3	118.44	102.02	1.447	-0.46311
138	846	C	11	5	83	104.33	118.47	102.052	1.435	0.387003
138	846	C	11	5	84	104.34	118.48	102.062	1.435	0.767614
138	846	C	11	5	86.4	104.36	118.5	102.084	1.408	0.313263
138	846	C	11	5	88.9	104.39	118.53	102.116	1.354	0.231424
138	846	C	11	5	91.1	104.41	118.55	102.136	1.4238	-0.287757
138	846	C	11	5	93.5	104.43	118.57	102.155	1.436	-0.207251
138	846	C	11	5	95.7	104.46	118.6	102.184	1.401	-0.17564
138	846	C	11	5	98	104.48	118.62	102.203	1.4073	0.0291246
138	846	C	11	5	99.7	104.5	118.64	102.221	1.398	0.455398
138	846	C	11	5	101.9	104.52	118.66	102.239	1.4268	-0.0799936
138	846	C	11	5	104.3	104.54	118.68	102.257	1.393	1.37823
138	846	C	11	5	106.6	104.57	118.71	102.283	1.379	-0.421693
138	846	C	11	5	109	104.59	118.73	102.301	1.423	0.452993
138	846	C	11	5	111.2	104.61	118.75	102.318	1.38	0.355217
138	846	C	11	5	113.7	104.64	118.78	102.344	1.4047	0.0788809
138	846	C	11	5	115.9	104.66	118.8	102.362	1.432	0.840108
138	846	C	11	5	118.4	104.68	118.82	102.38	1.347	-0.846027
138	846	C	11	5	120.6	104.71	118.85	102.405	1.4403	0.936027
138	846	C	11	5	123	104.73	118.87	102.422	1.408	0.0926856
138	846	C	11	5	125.2	104.75	118.89	102.439	1.462	-0.702023
138	846	C	11	5	127.7	104.78	118.92	102.465	1.4313	-0.362469
138	846	C	11	5	129.9	104.8	118.94	102.483	1.383	0.333935
138	846	C	11	5	132.4	104.82	118.96	102.5	1.4277	0.495482
138	846	C	11	5	134.6	104.85	118.99	102.526	1.479	-0.202255
138	846	C	11	5	137.1	104.87	119.01	102.542	1.45	-0.13796
138	846	C	11	5	139.3	104.89	119.03	102.559	1.448	-0.41403
138	846	C	11	5	141.7	104.92	119.06	102.585	1.465	0.103823
138	846	C	11	5	143.9	104.94	119.08	102.602	1.437	-0.0912041
138	846	C	11	6	2.8	105.03	119.17	102.678	1.426	-0.417768
138	846	C	11	6	5.6	105.06	119.2	102.703	1.383	-0.402354
138	846	C	11	6	8	105.08	119.22	102.72	1.466	0.412896
138	846	C	11	6	9.4	105.09	119.23	102.728	1.4574	-0.597644
138	846	C	11	6	11.8	105.12	119.26	102.753	1.48	0.292978
138	846	C	11	6	14	105.14	119.28	102.77	1.425	0.341062
138	846	C	11	6	16.5	105.17	119.31	102.795	1.4563	0.243025
138	846	C	11	6	18.7	105.19	119.33	102.811	1.49	-0.178917
138	846	C	11	6	21.2	105.21	119.35	102.828	1.413	-0.0822041
138	846	C	11	6	23	105.23	119.37	102.846	1.4386	0.208996
138	846	C	11	6	24.8	105.25	119.39	102.862	1.468	0.0301825
138	846	C	11	6	27.3	105.27	119.41	102.878	1.46	0.175515
138	846	C	11	6	29.5	105.29	119.43	102.895	1.4472	0.774667
138	846	C	11	6	32	105.32	119.46	102.92	1.454	0.514546
138	846	C	11	6	34.2	105.34	119.48	102.937	1.469	-0.36121
138	846	C	11	6	36.7	105.37	119.51	102.962	1.4428	-0.151305
138	846	C	11	6	38.1	105.38	119.52	102.97	1.466	0.421107
138	846	C	11	6	40.3	105.4	119.54	102.987	1.4465	0.544825
138	846	C	11	6	42.6	105.43	119.57	103.011	1.421	0.171254
138	846	C	11	6	45.1	105.45	119.59	103.027	1.443	1.01352
138	846	C	11	6	47.3	105.47	119.61	103.044	1.404	1.14264
138	846	C	11	6	49.8	105.5	119.64	103.069	1.411	-0.819299
138	846	C	11	6	52	105.52	119.66	103.085	1.474	-1.12778
138	846	C	11	6	53.5	105.53	119.67	103.093	1.423	-0.287944
138	846	C	11	6	55.9	105.56	119.7	103.117	1.428	0.459522
138	846	C	11	6	58.1	105.58	119.72	103.133	1.451	0.248283
138	846	C	11	6	60.6	105.61	119.75	103.157	1.418	-0.109088
138	846	C	11	6	62.8	105.63	119.77	103.173	1.488	-0.531019
138	846	C	11	6	65.3	105.65	119.79	103.188	1.503	-0.823299
138	846	C	11	6	67.5	105.67	119.81	103.204	1.435	-0.402429
138	846	C	11	6	68	105.68	119.82	103.211	1.385	0.278026
138	846	C	11	6	68.9	105.69	119.83	103.22	1.471	-0.581246
138	846	C	11	6	71.5	105.71	119.85	103.235	1.437	0.131356
138	846	C	11	6	73.7	105.74	119.88	103.259	1.48	-0.452918
138	846	C	11	6	76	105.76	119.9	103.275	1.5062	-0.534495
138	846	C	11	6	78.2	105.78	119.92	103.291	1.438	-0.599862
138	846	C	11	6	80.7	105.81	119.95	103.315	1.457	-0.0333873
138	846	C	11	6	82.9	105.83	119.97	103.331	1.4327	-0.495844
138	846	C	11	6	84.6	105.85	119.99	103.346	1.453	-0.844843
138	846	B	12	3	3	105.03	119.83	103.351	1.4638	0.16673
138	846	C	11	6	86.7	105.87	120.01	103.362	1.471	-0.505014
138	846	B	12	3	4.6	105.05	119.85	103.368	1.44	-0.13481
138	846	C	11	6	89.2	105.89	120.03	103.378	1.499	-1.05662
138	846	B	12	3	7.1	105.07	119.87	103.384	1.444	-0.23296
138	846	B	12	3	8	105.08	119.88	103.392	1.4507	-0.35363
138	846	C	11	6	91.4	105.91	120.05	103.393	1.482	-1.89994
138	846	B	12	3	8.6	105.09	119.89	103.401	1.46	-0.44501
138	846	B	12	3	10.8	105.11	119.91	103.417	1.4773	-1.0801
138	846	B	12	3	13	105.13	119.93	103.434	1.517	-0.36742
138	846	B	12	3	14.1	105.14	119.94	103.442	1.4435	-1.0158
138	846	B	12	3	16.3	105.16	119.96	103.458	1.44	-1.1628
138	846	B	12	3	18	105.18	119.98	103.475	1.424	-0.67517
138	846	B	12	3	19.9	105.2	120	103.491	1.464	-0.23639
138	846	B	12	3	22.1	105.22	120.02	103.507	1.429	-0.64369
138	846	B	12	3	23	105.23	120.03	103.516	1.4598	-1.0768
138	846	B	12	3	23.8	105.24	120.04	103.524	1.435	-0.61167
138	846	B	12	3	26	105.26	120.06	103.541	1.407	0.10371
138	846	B	12	3	28	105.28	120.08	103.557	1.459	-0.73747
138	846	B	12	3	29.5	105.29	120.09	103.566	1.396	-0.95468
138	846	B	12	3	31.7	105.32	120.12	103.591	1.4353	-0.74395
138	846	B	12	3	33.2	105.33	120.13	103.599	1.386	-0.098809
138	846	B	12	3	35.6	105.36	120.16	103.624	1.365	-1.7701
138	846	B	12	3	38	105.38	120.18	103.64	1.4427	-0.76723
138	846	B	12	3	39.4	105.39	120.19	103.648	1.4372	-0.72953
138	846	B	12	3	41.6	105.42	120.22	103.673	1.422	-0.079489
138	846	B	12	3	43	105.43	120.23	103.681	1.479	-0.19365
138	846	B	12	3	45.3	105.45	120.25	103.698	1.415	-0.82873
138	846	B	12	3	48	105.48	120.28	103.723	1.453	-0.7319
138	846	B	12	3	49.1	105.49	120.29	103.731	1.4502	-0.79725
138	846	B	12	3	51.3	105.51	120.31	103.748	1.4455	-0.17949
138	846	B	12	3	53	105.53	120.33	103.765	1.42	-0.68983
138	846	B	12	3	55.3	105.55	120.35	103.781	1.4673	-1.0266
138	846	B	12	3	58	105.58	120.38	103.806	1.446	-0.30337
138	846	B	12	3	58.9	105.59	120.39	103.814	1.516	-1.1416
138	846	B	12	3	61.4	105.61	120.41	103.831	1.4857	-0.39365
138	846	B	12	3	63	105.63	120.43	103.847	1.506	-0.15554
138	846	B	12	3	65.1	105.65	120.45	103.864	1.4512	-0.75266
138	846	B	12	3	68	105.68	120.48	103.888	1.471	-0.40363
138	846	B	12	3	69	105.69	120.49	103.897	1.521	-0.4283
138	846	B	12	3	71.2	105.71	120.51	103.913	1.4955	0.12438
138	846	B	12	3	73	105.73	120.53	103.93	1.453	-0.13106
138	846	B	12	3	75.1	105.75	120.55	103.946	1.4593	0.025699
138	846	B	12	3	77.3	105.77	120.57	103.963	1.472	-0.73955
138	846	B	12	3	78	105.78	120.58	103.971	1.4682	-0.030413
138	846	B	12	3	78.9	105.79	120.59	103.98	1.482	-0.18688
138	846	B	12	3	81.1	105.81	120.61	103.996	1.428	-0.78942
138	846	B	12	3	83	105.83	120.63	104.013	1.4707	0.11579
138	846	B	12	3	85	105.85	120.65	104.03	1.458	-0.39998
138	846	B	12	3	87.2	105.87	120.67	104.046	1.429	-0.87236
138	846	B	12	3	88	105.88	120.68	104.055	1.401	-0.13718
138	846	B	12	3	88.7	105.89	120.69	104.063	1.482	0.18471
138	846	B	12	3	91.1	105.91	120.71	104.08	1.461	-0.36902
138	846	B	12	3	93	105.93	120.73	104.097	1.461	-0.67598
138	846	B	12	3	94.8	105.95	120.75	104.114	1.384	-1.0372
138	846	B	12	3	97.2	105.97	120.77	104.131	1.502	-0.54958
138	846	B	12	3	98	105.98	120.78	104.139	1.416	-0.60191
138	846	B	12	3	98.6	105.99	120.79	104.148	1.435	-0.40367
138	846	B	12	3	101	106.01	120.81	104.164	1.4	-0.16014
138	846	B	12	3	103	106.03	120.83	104.181	1.363	-0.26643
138	846	B	12	3	104.7	106.05	120.85	104.198	1.385	-0.48661
138	846	B	12	3	107.2	106.07	120.87	104.214	1.456	-0.84509
138	846	B	12	3	108	106.08	120.88	104.223	1.43	-0.41255
138	846	B	12	3	108.6	106.09	120.89	104.232	1.488	-0.9107
138	846	B	12	3	110.8	106.11	120.91	104.249	1.411	-0.21159
138	846	B	12	3	113.2	106.13	120.93	104.266	1.43	-0.32601
138	846	B	12	3	115.5	106.15	120.95	104.283	1.4242	-0.9611
138	846	B	12	3	117.9	106.18	120.98	104.31	1.401	0.38858
138	846	B	12	3	120.1	106.2	121	104.328	1.428	-0.65327
138	846	B	12	3	122.6	106.23	121.03	104.355	1.411	0.50116
138	846	B	12	3	124.8	106.25	121.05	104.373	1.41	-0.52443
138	846	B	12	3	127.3	106.27	121.07	104.391	1.46	-0.65512
138	846	B	12	3	129.4	106.29	121.09	104.41	1.422	-0.83463
138	846	B	12	3	131.8	106.32	121.12	104.437	1.441	-0.37984
138	846	B	12	3	134.3	106.34	121.14	104.455	1.487	-0.96611
138	846	B	12	3	136.5	106.36	121.16	104.473	1.458	-1.0317
138	846	B	12	3	139	106.39	121.19	104.501	1.41	-0.072541
138	846	B	12	3	141.1	106.41	121.21	104.519	1.437	-1.9767
138	846	B	12	3	143.6	106.44	121.24	104.546	1.438	-1.0176
138	846	B	12	4	3	106.53	121.33	104.629	1.538	-0.011152
138	846	B	12	4	4.9	106.55	121.35	104.648	1.551	-0.35336
138	846	B	12	4	7.1	106.57	121.37	104.666	1.553	0.32948
138	846	B	12	4	8.5	106.58	121.38	104.676	1.468	0.077018
138	846	B	12	4	11	106.61	121.41	104.704	1.517	0.73519
138	846	B	12	4	13	106.63	121.43	104.722	1.449	0.018751
138	846	B	12	4	14.6	106.65	121.45	104.741	1.514	0.18093
138	846	B	12	4	17.2	106.67	121.47	104.76	1.5	0.60344
138	846	B	12	4	18.5	106.68	121.48	104.769	1.4783	0.36725
138	846	B	12	4	20.9	106.71	121.51	104.797	1.452	-0.24369
138	846	B	12	4	23	106.73	121.53	104.816	1.457	-0.45031
138	846	B	12	4	24.6	106.75	121.55	104.835	1.451	0.32473
138	846	B	12	4	27	106.77	121.57	104.854	1.439	0.4381
138	846	B	12	4	28.5	106.78	121.58	104.863	1.498	0.020217
138	846	B	12	4	30.7	106.81	121.61	104.891	1.416	-0.13243
138	846	B	12	4	33	106.83	121.63	104.91	1.462	0.3877
138	846	B	12	4	34.6	106.85	121.65	104.928	1.45	0.35463
138	846	B	12	4	36.8	106.87	121.67	104.947	1.462	0.38665
138	846	B	12	4	38.5	106.88	121.68	104.956	1.463	0.64129
138	846	B	12	4	43	106.93	121.73	104.984	1.438	0.34439
138	846	B	12	4	40.6	106.91	121.71	105.003	1.43	0.67846
138	846	B	12	4	44.4	106.94	121.74	105.012	1.378	0.36853
138	846	B	12	4	46.8	106.97	121.77	105.04	1.4185	0.92094
138	846	B	12	4	48.3	106.98	121.78	105.05	1.467	0.43798
138	846	B	12	4	50.5	107	121.8	105.068	1.41	0.26932
138	846	B	12	4	53	107.03	121.83	105.094	1.429	-0.23044
138	846	B	12	4	54.3	107.04	121.84	105.103	1.48	-0.74052
138	846	B	12	4	56.6	107.07	121.87	105.129	1.441	-0.23692
138	846	B	12	4	58	107.08	121.88	105.137	1.345	-0.16396
138	846	B	12	4	60.4	107.1	121.9	105.154	1.4462	-0.67702
138	846	B	12	4	63	107.13	121.93	105.178	1.387	-0.35782
138	846	B	12	4	64.2	107.14	121.94	105.185	1.429	-0.12487
138	846	B	12	4	66.5	107.17	121.97	105.209	1.4	-0.28837
138	846	B	12	4	68	107.18	121.98	105.217	1.431	-1.0479
138	846	B	12	4	70.3	107.2	122	105.233	1.386	-1.6396
138	846	B	12	4	73	107.23	122.03	105.257	1.415	-0.88926
138	846	B	12	4	74.1	107.24	122.04	105.265	1.464	-1.3153
138	846	B	12	4	76.4	107.26	122.06	105.281	1.387	-1.0229
138	846	B	12	4	78	107.28	122.08	105.298	1.445	-1.3217
138	846	B	12	4	80.2	107.3	122.1	105.314	1.384	-1.6748
138	846	B	12	4	83	107.33	122.13	105.339	1.357	-0.68309
138	846	B	12	4	84	107.34	122.14	105.348	1.395	-1.1877
138	846	B	12	4	86.3	107.36	122.16	105.364	1.388	-1.3184
138	846	B	12	4	88	107.38	122.18	105.381	1.396	-0.87966
138	846	B	12	4	90.1	107.4	122.2	105.397	1.356	-0.68493
138	846	B	12	4	92.4	107.42	122.22	105.414	1.41	-0.99461
138	846	B	12	4	93	107.43	122.23	105.422	1.443	-1.3366
138	846	B	12	4	93.8	107.44	122.24	105.43	1.365	-1.0277
138	846	B	12	4	96.2	107.46	122.26	105.447	1.358	-1.7929
138	846	B	12	4	98	107.48	122.28	105.464	1.419	-1.1725
138	846	B	12	4	100	107.5	122.3	105.48	1.448	-1.2245
138	846	B	12	4	102.3	107.52	122.32	105.497	1.448	-0.52539
138	846	B	12	4	103	107.53	122.33	105.505	1.394	-0.84456
138	846	B	12	4	103.8	107.54	122.34	105.513	1.4373	-0.7049
138	846	B	12	4	106.1	107.56	122.36	105.53	1.363	-1.9745
138	846	B	12	4	108.4	107.58	122.38	105.547	1.376	-1.3405
138	846	B	12	4	110.8	107.61	122.41	105.571	1.42	-0.85318
138	846	B	12	4	113.1	107.63	122.43	105.588	1.407	-0.62592
138	846	B	12	4	115.4	107.65	122.45	105.605	1.409	0.089463
138	846	B	12	4	117.8	107.68	122.48	105.63	1.36	-0.23674
138	846	B	12	4	120.1	107.7	122.5	105.646	1.3698	-0.36744
138	846	B	12	4	122.4	107.72	122.52	105.663	1.367	0.34795
138	846	B	12	4	124.8	107.75	122.55	105.688	1.402	0.81901
138	846	B	12	4	127.1	107.77	122.57	105.704	1.33	-0.36928
138	846	B	12	4	129.5	107.79	122.59	105.721	1.436	-0.10948
138	846	B	12	4	134.1	107.84	122.64	105.748	1.422	-0.22469
138	846	B	12	4	131.8	107.82	122.62	105.766	1.454	-0.46823
138	846	B	12	4	136.5	107.86	122.66	105.784	1.4393	-1.0388
138	846	B	12	4	138.8	107.89	122.69	105.812	1.461	-0.60024
138	846	B	12	5	3	108.03	122.83	105.948	1.4	0.38045
138	846	B	12	5	4.2	108.04	122.84	105.958	1.42	0.35578
138	846	B	12	5	6.6	108.07	122.87	105.987	1.429	0.38753
138	846	B	12	5	8	108.08	122.88	105.996	1.434	-0.22289
138	846	B	12	5	10.4	108.1	122.9	106.016	1.424	-0.67086
138	846	B	12	5	13	108.13	122.93	106.045	1.4325	-0.70148
138	846	B	12	5	14.2	108.14	122.94	106.055	1.494	0.23924
138	846	B	12	5	16.5	108.17	122.97	106.084	1.478	-0.54254
138	846	B	12	5	18.1	108.18	122.98	106.093	1.471	-0.12248
138	846	B	12	5	20.3	108.2	123	106.111	1.41	-0.55961
138	846	B	12	5	23	108.23	123.03	106.139	1.44	-0.36515
138	846	B	12	5	24.1	108.24	123.04	106.148	1.454	-0.56066
138	846	B	12	5	26.4	108.26	123.06	106.167	1.4438	-0.56119
138	846	B	12	5	28.1	108.28	123.08	106.184	1.405	-1.001
138	846	B	12	5	30.3	108.3	123.1	106.201	1.484	-1.8802
138	846	B	12	5	33	108.33	123.13	106.227	1.395	-0.74473
138	846	B	12	5	34.1	108.34	123.14	106.235	1.39	-0.54703
138	846	B	12	5	36.4	108.36	123.16	106.252	1.4	-1.117
138	846	B	12	5	38	108.38	123.18	106.269	1.434	-1.0145
138	846	B	12	5	40.2	108.4	123.2	106.285	1.4328	-1.1669
138	846	B	12	5	43	108.43	123.23	106.31	1.444	-0.69855
138	846	B	12	5	44	108.44	123.24	106.319	1.463	-1.2493
138	846	B	12	5	46.3	108.46	123.26	106.335	1.416	-1.4776
138	846	B	12	5	48	108.48	123.28	106.352	1.461	-0.76224
138	846	B	12	5	50.2	108.5	123.3	106.368	1.415	-1.4624
138	846	B	12	5	53	108.53	123.33	106.393	1.398	-1.0619
138	846	B	12	5	54	108.54	123.34	106.401	1.4357	-0.61739
138	846	B	12	5	56.3	108.56	123.36	106.418	1.479	-2.0009
138	846	B	12	5	58	108.58	123.38	106.434	1.508	-0.48285
138	846	B	12	5	60.1	108.6	123.4	106.451	1.422	-1.0095
138	846	B	12	5	63.9	108.64	123.44	106.476	1.41	-0.13191
138	846	B	12	5	63	108.63	123.43	106.484	1.396	-0.63061
138	846	B	12	5	66.3	108.66	123.46	106.502	1.417	-1.4178
138	846	B	12	5	68	108.68	123.48	106.52	1.421	-0.69159
138	846	B	12	5	70.1	108.7	123.5	106.538	1.464	0.14311
138	846	B	12	5	72.4	108.72	123.52	106.556	1.472	-0.32927
138	846	B	12	5	73	108.73	123.53	106.565	1.445	-0.36207
138	846	B	12	5	73.8	108.74	123.54	106.574	1.439	-0.085732
138	846	B	12	5	76.1	108.76	123.56	106.593	1.464	-0.54184
138	846	B	12	5	78	108.78	123.58	106.612	1.394	-0.72135
138	846	B	12	5	79.9	108.8	123.6	106.632	1.453	-1.4215
138	846	B	12	5	82.3	108.82	123.62	106.651	1.359	-0.071572
138	846	B	12	5	83	108.83	123.63	106.661	1.467	-0.21176
138	846	B	12	5	83.7	108.84	123.64	106.671	1.457	0.15569
138	846	B	12	5	86	108.86	123.66	106.69	1.446	-0.73973
138	846	B	12	5	88	108.88	123.68	106.71	1.407	-0.23044
138	846	B	12	5	89.8	108.9	123.7	106.729	1.43	0.31681
138	846	B	12	5	92.2	108.92	123.72	106.749	1.401	-0.93656
138	846	B	12	5	93	108.93	123.73	106.758	1.412	-0.52029
138	846	B	12	5	93.8	108.94	123.74	106.768	1.4248	-0.042197
138	846	B	12	5	95.9	108.96	123.76	106.788	1.44	-0.17289
138	846	B	12	5	98	108.98	123.78	106.807	1.402	-0.38223
138	846	B	12	5	99.7	109	123.8	106.827	1.438	-0.27157
138	846	B	12	5	102	109.02	123.82	106.846	1.455	-0.028037
138	846	B	12	5	103.5	109.03	123.83	106.856	1.397	-0.45405
138	846	B	12	5	105.8	109.06	123.86	106.885	1.456	-0.077905
138	846	B	12	5	108	109.08	123.88	106.904	1.439	-0.39571
138	846	B	12	5	109.6	109.1	123.9	106.924	1.39	-0.81114
138	846	B	12	5	111.9	109.12	123.92	106.943	1.482	-0.45371
138	846	B	12	5	114.3	109.14	123.94	106.963	1.367	-1.0888
138	846	B	12	5	116.6	109.17	123.97	106.992	1.418	-0.9757
138	846	B	12	5	119	109.19	123.99	107.011	1.421	0.048831
138	846	B	12	5	121.3	109.21	124.01	107.031	1.413	-0.7815
138	846	B	12	5	123.6	109.24	124.04	107.06	1.4562	-0.70094
138	846	B	12	5	126	109.26	124.06	107.079	1.468	-0.32724
138	846	B	12	5	128.3	109.28	124.08	107.099	1.43	-0.8647
138	846	B	12	5	130.6	109.31	124.11	107.128	1.488	0.27345
138	846	B	12	5	133	109.33	124.13	107.148	1.42	0.51699
138	846	B	12	5	135.3	109.35	124.15	107.167	1.444	-0.58995
138	846	B	12	5	137.7	109.38	124.18	107.196	1.435	-1.4043
138	846	B	12	5	140	109.4	124.2	107.216	1.4425	-0.0055217
138	846	B	12	5	142.3	109.42	124.22	107.235	1.457	-0.55925
138	846	B	12	5	144.6	109.45	124.25	107.264	1.427	0.1396
138	846	B	12	6	3	109.53	124.33	107.342	1.44	0.56323
138	846	B	12	6	4.7	109.55	124.35	107.362	1.431	-0.54641
138	846	B	12	6	6.9	109.57	124.37	107.381	1.406	-0.2378
138	846	B	12	6	8.4	109.58	124.38	107.391	1.399	-0.63398
138	846	B	12	6	10.9	109.61	124.41	107.42	1.4464	-0.30394
138	846	B	12	6	13	109.63	124.43	107.44	1.411	-0.1282
138	846	B	12	6	14.4	109.64	124.44	107.45	1.336	-0.011854
138	846	B	12	6	16.8	109.67	124.47	107.479	1.414	-0.51704
138	846	B	12	6	18.1	109.68	124.48	107.489	1.424	0.44267
138	846	B	12	6	20.6	109.71	124.51	107.518	1.38	-0.45301
138	846	B	12	6	23	109.73	124.53	107.536	1.392	-0.34507
138	846	B	12	6	24.3	109.74	124.54	107.545	1.369	0.16449
138	846	B	12	6	26.8	109.77	124.57	107.572	1.371	-0.19426
138	846	B	12	6	28.2	109.78	124.58	107.581	1.309	0.0875
138	846	B	12	6	30.4	109.8	124.6	107.599	1.373	0.73238
138	846	B	12	6	33	109.83	124.63	107.624	1.303	-0.46431
138	846	B	12	6	34.4	109.84	124.64	107.633	1.366	-0.52152
138	846	B	12	6	36.6	109.87	124.67	107.658	1.341	-0.78265
138	846	B	12	6	38.2	109.88	124.68	107.666	1.3215	-0.13208
138	846	B	12	6	40.4	109.9	124.7	107.683	1.366	-0.70208
138	846	B	12	6	43	109.93	124.73	107.707	1.365	-0.2012
138	846	B	12	6	44.3	109.94	124.74	107.716	1.387	-0.60551
138	846	B	12	6	46.5	109.96	124.76	107.732	1.363	-1.0616
138	846	B	12	6	48	109.98	124.78	107.749	1.453	-0.21607
138	846	B	12	6	50.4	110	124.8	107.766	1.317	-1.2417
138	846	B	12	6	53	110.03	124.83	107.79	1.33	-0.60247
138	846	B	12	6	54.1	110.04	124.84	107.799	1.39	-1.4054
138	846	B	12	6	56.5	110.06	124.86	107.815	1.34	-1.7476
138	846	B	12	6	58	110.08	124.88	107.832	1.334	-0.48447
138	846	B	12	6	68	110.18	124.98	107.849	1.362	-0.57659
138	846	B	12	6	60.4	110.1	124.9	107.873	1.336	-0.82126
138	846	B	12	6	66.4	110.16	124.96	107.881	1.385	0.10459
138	846	B	12	6	64	110.14	124.94	107.898	1.348	-0.93621
138	846	B	12	6	70.1	110.2	125	107.914	1.399	-0.3195
138	846	B	12	6	63	110.13	124.93	107.931	1.347	-0.36376
138	846	B	12	6	73.3	110.23	125.03	107.955	1.366	-0.44232
138	846	B	12	6	75.5	110.25	125.05	107.972	1.345	-0.85775
138	846	B	12	6	78	110.28	125.08	107.996	1.345	-0.088399
138	846	B	12	6	79.3	110.29	125.09	108.004	1.334	-0.43577
138	846	B	12	6	81.7	110.32	125.12	108.029	1.412	0.70239
138	846	B	12	6	83.1	110.33	125.13	108.037	1.403	0.20858
138	846	B	12	6	85.4	110.35	125.15	108.053	1.453	0.53889
138	846	B	12	6	88	110.38	125.18	108.078	1.3727	-0.35408
138	846	B	12	6	89.1	110.39	125.19	108.086	1.405	-0.031642
138	846	B	12	6	91.5	110.42	125.22	108.109	1.374	0.7811
138	846	B	12	6	93	110.43	125.23	108.117	1.353	0.36593
138	846	B	12	6	95.2	110.45	125.25	108.133	1.392	-0.3261
138	846	B	12	6	98.4	110.48	125.28	108.157	1.424	-0.22462
138	846	B	12	6	100.7	110.51	125.31	108.18	1.427	-0.018538
138	846	B	12	6	103	110.53	125.33	108.196	1.3787	-0.081437
138	846	B	12	6	104.2	110.54	125.34	108.204	1.389	0.14338
138	846	B	12	6	106.6	110.57	125.37	108.227	1.465	-0.73603
138	846	B	12	6	108	110.58	125.38	108.235	1.404	-0.042079
138	846	B	12	6	109.9	110.6	125.4	108.251	1.409	-0.2487
138	846	B	12	6	112.3	110.62	125.42	108.266	1.419	-0.72108
138	846	B	12	6	114.6	110.65	125.45	108.291	1.378	-1.1775
138	846	B	12	6	116.9	110.67	125.47	108.306	1.4093	0.13995
138	846	B	12	6	119.2	110.69	125.49	108.322	1.442	-0.20226
138	846	B	12	6	121.6	110.72	125.52	108.346	1.393	-0.20306
138	846	B	12	6	123.9	110.74	125.54	108.361	1.379	-1.4564
138	846	B	12	6	126.3	110.76	125.56	108.377	1.416	0.46299
138	846	B	12	6	128.6	110.79	125.59	108.401	1.441	-0.93709
138	846	B	12	6	130.9	110.81	125.61	108.416	1.43	-0.62847
138	846	B	12	6	133.3	110.83	125.63	108.432	1.4442	-1.1985
138	846	B	12	6	135.6	110.86	125.66	108.456	1.402	-1.8013
138	846	B	12	6	138	110.88	125.68	108.472	1.435	-1.4439
138	846	B	12	6	140.3	110.9	125.7	108.487	1.47	-0.28916
138	846	B	12	6	142.6	110.93	125.73	108.511	1.516	-0.71299
138	846	B	12	6	145	110.95	125.75	108.527	1.503	0.23018
138	846	B	12	7	2.4	111.02	125.82	108.582	1.4803	-1.0245
138	846	B	12	7	5.2	111.05	125.85	108.606	1.459	-0.71616
138	846	B	12	7	8	111.08	125.88	108.63	1.546	-0.81186
138	846	B	12	7	9	111.09	125.89	108.638	1.551	-1.1891
138	846	B	12	7	11.5	111.11	125.91	108.654	1.522	-0.75028
138	846	B	12	7	13.7	111.14	125.94	108.678	1.489	-1.0277
138	846	B	12	7	16.1	111.16	125.96	108.694	1.48	-1.0445
138	846	B	12	7	18.3	111.18	125.98	108.71	1.5267	-0.23146
138	846	B	12	7	20.8	111.21	126.01	108.733	1.582	-0.85054
138	846	B	12	7	23	111.23	126.03	108.749	1.527	-0.54193
138	846	B	12	7	25.5	111.25	126.05	108.765	1.544	0.206
138	846	B	12	7	27.7	111.28	126.08	108.789	1.541	-0.26664
138	846	B	12	7	30.2	111.3	126.1	108.804	1.529	-1.0482
138	846	D	12	5	46.5	112.76	126.26	108.812	1.526	0.428998
138	846	B	12	7	32.4	111.32	126.12	108.82	1.4982	-0.60938
138	846	D	12	5	48.9	112.79	126.29	108.836	1.484	0.0450379
138	846	B	12	7	34.8	111.35	126.15	108.844	1.398	-0.5939
138	846	D	12	5	51.2	112.81	126.31	108.852	1.448	-0.33864
138	846	B	12	7	37	111.37	126.17	108.86	1.419	1.0326
138	846	D	12	5	53	112.83	126.33	108.868	1.445	0.197153
138	846	B	12	7	39.5	111.39	126.19	108.876	1.484	1.2436
138	846	D	12	5	55	112.85	126.35	108.885	1.426	-0.584962
138	846	D	12	5	57.3	112.87	126.37	108.903	1.454	-0.0798186
138	846	D	12	5	59.7	112.9	126.4	108.929	1.445	0.961401
138	846	D	12	5	62	112.92	126.42	108.946	1.38	0.0566893
138	846	D	12	5	63.4	112.93	126.43	108.955	1.394	0.0717313
138	846	D	12	5	65.7	112.96	126.46	108.984	1.409	-0.940534
138	846	D	12	5	68.1	112.98	126.48	109.002	1.406	0.0396695
138	846	D	12	5	70.4	113	126.5	109.021	1.409	0.299621
138	846	D	12	5	73	113.03	126.53	109.049	1.39	-0.145637
138	846	D	12	5	74.1	113.04	126.54	109.059	1.422	-0.682278
138	846	D	12	5	76.5	113.06	126.56	109.078	1.38	0.0067601
138	846	D	12	5	78.8	113.09	126.59	109.106	1.402	-0.913558
138	846	D	12	5	81.1	113.11	126.61	109.125	1.381	-0.0865997
138	846	D	12	5	83	113.13	126.63	109.144	1.428	-1.09858
138	846	D	12	5	84.9	113.15	126.65	109.163	1.462	-0.700711
138	846	D	12	5	87.2	113.17	126.67	109.181	1.455	-0.793223
138	846	D	12	5	89.5	113.19	126.69	109.2	1.4175	-1.34547
138	846	D	12	5	91.9	113.22	126.72	109.229	1.441	-0.917232
138	846	D	12	5	93.3	113.23	126.73	109.238	1.434	-0.227911
138	846	D	12	5	95.7	113.26	126.76	109.266	1.47	-0.213434
138	846	D	12	5	98	113.28	126.78	109.285	1.424	0.000544023
138	846	D	12	5	100.4	113.3	126.8	109.304	1.457	-0.6743
138	846	D	12	5	103	113.33	126.83	109.332	1.508	-0.552551
138	846	D	12	5	104.1	113.34	126.84	109.341	1.489	-1.90139
138	846	D	12	5	106.5	113.36	126.86	109.36	1.445	-1.3656
138	846	D	12	5	108.8	113.39	126.89	109.388	1.401	-0.799439
138	846	D	12	5	111.1	113.41	126.91	109.407	1.495	-0.861302
138	846	D	12	5	113.5	113.43	126.93	109.425	1.432	-0.110966
138	846	D	12	5	115.8	113.46	126.96	109.454	1.456	0.0261072
138	846	D	12	5	118.1	113.48	126.98	109.472	1.431	-1.58353
138	846	D	12	5	120.5	113.5	127	109.491	1.4505	0.300818
138	846	D	12	5	122.8	113.53	127.03	109.519	1.488	1.09685
138	846	D	12	5	125.1	113.55	127.05	109.538	1.455	0.100187
138	846	D	12	5	127.5	113.57	127.07	109.557	1.548	0.191569
138	846	D	12	5	129.8	113.6	127.1	109.585	1.519	-0.115769
138	846	D	12	5	132.1	113.62	127.12	109.604	1.45	-0.0856852
138	846	D	12	5	134.5	113.64	127.14	109.622	1.446	-0.791178
138	846	D	12	5	136.8	113.67	127.17	109.651	1.499	0.495234
138	846	D	12	5	139.1	113.69	127.19	109.669	1.429	-1.12973
138	846	D	12	6	3	113.83	127.33	109.801	1.424	-0.19889
138	846	D	12	6	4.6	113.85	127.35	109.82	1.477	-1.2875
138	846	D	12	6	7.1	113.87	127.37	109.838	1.452	0.0298472
138	846	D	12	6	9.3	113.89	127.39	109.857	1.45	-1.28863
138	846	D	12	6	11.7	113.92	127.42	109.885	1.407	-0.676493
138	846	D	12	6	13.2	113.93	127.43	109.895	1.419	-0.615478
138	846	D	12	6	15.4	113.95	127.45	109.914	1.389	-0.0796848
138	846	D	12	6	17.9	113.98	127.48	109.942	1.44	-0.724162
138	846	D	12	6	20.1	114	127.5	109.96	1.436	-0.816674
138	846	D	12	6	23	114.03	127.53	109.989	1.46	-0.618303
138	846	D	12	6	23.8	114.04	127.54	109.998	1.379	0.500104
138	846	D	12	6	26	114.06	127.56	110.017	1.41	0.560837
138	846	D	12	6	28.4	114.08	127.58	110.035	1.394	0.0392382
138	846	D	12	6	30.7	114.11	127.61	110.064	1.499	-0.988352
138	846	D	12	6	33	114.13	127.63	110.082	1.445	-0.192042
138	846	D	12	6	34.5	114.14	127.64	110.092	1.407	0.282735
138	846	D	12	6	37	114.17	127.67	110.12	1.388	-0.223822
138	846	D	12	6	39.2	114.19	127.69	110.138	1.401	-0.224387
138	846	D	12	6	41.7	114.22	127.72	110.167	1.4335	0.724886
138	846	D	12	6	43	114.23	127.73	110.176	1.457	0.755252
138	846	D	12	6	44.9	114.25	127.75	110.195	1.433	0.264303
138	846	D	12	6	47.3	114.27	127.77	110.213	1.499	0.708148
138	846	D	12	6	49.5	114.29	127.79	110.232	1.431	0.952776
138	846	D	12	6	52	114.32	127.82	110.26	1.479	-0.396629
138	846	D	12	6	53.5	114.33	127.83	110.27	1.539	0.553208
138	846	D	12	6	55.7	114.36	127.86	110.298	1.455	-0.305813
138	846	D	12	6	58.1	114.38	127.88	110.317	1.424	0.107384
138	846	D	12	6	60.3	114.4	127.9	110.335	1.507	0.0455211
138	846	D	12	6	63	114.43	127.93	110.363	1.472	0.688303
138	846	D	12	6	64.1	114.44	127.94	110.373	1.5	-0.737159
138	846	D	12	6	66.6	114.47	127.97	110.401	1.529	0.13549
138	846	D	12	6	68.7	114.49	127.99	110.42	1.545	0.885827
138	846	D	12	6	71.2	114.51	128.01	110.438	1.486	0.440851
138	846	D	12	6	73	114.53	128.03	110.457	1.532	0.440285
138	846	B	13	1	39.2	111.89	128.34	110.545	1.524	1.2194
138	846	B	13	1	41.6	111.92	128.37	110.573	1.459	-0.16436
138	846	B	13	1	43.9	111.94	128.39	110.592	1.424	0.63238
138	846	B	13	1	46.2	111.96	128.41	110.611	1.454	-0.47456
138	846	B	13	1	48.6	111.99	128.44	110.639	1.393	0.58225
138	846	B	13	1	50.9	112.01	128.46	110.658	1.443	0.35393
138	846	B	13	1	53	112.03	128.48	110.677	1.432	0.00087125
138	846	B	13	1	54.7	112.05	128.5	110.695	1.454	-0.42812
138	846	B	13	1	57	112.07	128.52	110.714	1.47	-0.34729
138	846	B	13	1	59.4	112.09	128.54	110.733	1.46	-0.44544
138	846	B	13	1	61.7	112.12	128.57	110.761	1.456	-0.64148
138	846	B	13	1	64.1	112.14	128.59	110.78	1.47	0.31796
138	846	B	13	1	66.4	112.16	128.61	110.8	1.395	-1.0168
138	846	B	13	1	68	112.18	128.63	110.819	1.435	-0.26884
138	846	B	13	1	69.9	112.2	128.65	110.837	1.452	-0.46462
138	846	B	13	1	72.3	112.22	128.67	110.855	1.466	-0.2699
138	846	B	13	1	74.6	112.25	128.7	110.881	1.46	-0.25442
138	846	B	13	1	76.9	112.27	128.72	110.899	1.42	-0.66171
138	846	B	13	1	79.3	112.29	128.74	110.916	1.466	-0.79241
138	846	B	13	1	81.6	112.32	128.77	110.942	1.464	-1.6393
138	846	B	13	1	83	112.33	128.78	110.95	1.419	-0.98057
138	846	B	13	1	85.4	112.35	128.8	110.966	1.4465	-0.19197
138	846	B	13	1	87.7	112.38	128.83	110.99	1.375	-1.1202
138	846	B	13	1	90.1	112.4	128.85	111.006	1.388	-0.81158
138	846	B	13	1	92.4	112.42	128.87	111.022	1.402	0.017699
138	846	B	13	1	94.7	112.45	128.9	111.046	1.44	-0.61765
138	846	B	13	1	97.1	112.47	128.92	111.062	1.413	-2.1802
138	846	B	13	1	98	112.48	128.93	111.07	1.448	-0.53383
138	846	B	13	1	98.5	112.49	128.94	111.078	1.427	-1.4973
138	846	B	13	1	100.9	112.51	128.96	111.094	1.4	-0.81448
138	846	B	13	1	103.2	112.53	128.98	111.11	1.423	-1.2869
138	846	B	13	1	105.5	112.56	129.01	111.134	1.484	-0.78326
138	846	B	13	1	107.9	112.58	129.03	111.15	1.448	-1.516
138	846	B	13	1	110.2	112.6	129.05	111.166	1.392	-1.0446
138	846	B	13	1	112.5	112.63	129.08	111.19	1.502	-0.24817
138	846	B	13	1	114.9	112.65	129.1	111.206	1.416	-1.5015
138	846	B	13	1	117.2	112.67	129.12	111.222	1.44	-0.55837
138	846	B	13	1	119.5	112.69	129.14	111.237	1.447	-1.5514
138	846	B	13	1	121.9	112.72	129.17	111.261	1.455	-1.9915
138	846	B	13	1	124.2	112.74	129.19	111.277	1.426	-1.3738
138	846	B	13	1	126.5	112.76	129.21	111.293	1.494	-1.4882
138	846	B	13	1	128.9	112.79	129.24	111.316	1.473	-1.3588
138	846	B	13	1	131.2	112.81	129.26	111.332	1.463	-2.0102
138	846	B	13	1	133.5	112.83	129.28	111.349	1.519	-1.1321
138	846	B	13	1	135.9	112.86	129.31	111.373	1.458	-0.59593
138	846	B	13	1	138.2	112.88	129.33	111.389	1.494	-1.8656
138	846	B	13	1	140.6	112.91	129.36	111.415	1.493	-1.9803
138	846	B	13	1	142.9	112.93	129.38	111.435	1.449	-0.98827
138	846	B	13	1	145.2	112.95	129.4	111.454	1.48	-0.51695
138	846	B	13	2	2.7	113.03	129.48	111.531	1.5225	-0.51906
138	846	B	13	2	5.4	113.05	129.5	111.551	1.437	-1.3982
138	846	B	13	2	8	113.08	129.53	111.58	1.519	-0.69393
138	846	B	13	2	9.4	113.09	129.54	111.589	1.5	-1.9037
138	846	B	13	2	11.6	113.12	129.57	111.618	1.502	-1.6929
138	846	B	13	2	14	113.14	129.59	111.638	1.496	-0.97754
138	846	B	13	2	16.2	113.16	129.61	111.657	1.5	-1.1896
138	846	B	13	2	18.7	113.19	129.64	111.686	1.469	-1.1578
138	846	B	13	2	20.9	113.21	129.66	111.705	1.58	-1.9556
138	846	B	13	2	23	113.23	129.68	111.725	1.538	-1.7962
138	846	B	13	2	24.8	113.25	129.7	111.744	1.467	-1.8428
138	846	B	13	2	27	113.27	129.72	111.763	1.499	-1.2738
138	846	B	13	2	29.4	113.29	129.74	111.783	1.516	-2.4459
138	846	B	13	2	31.9	113.32	129.77	111.812	1.511	-0.72196
138	846	B	13	2	34.1	113.34	129.79	111.831	1.544	-0.95028
138	846	B	13	2	36.5	113.36	129.81	111.851	1.485	-0.43014
138	846	B	13	2	38.1	113.38	129.83	111.87	1.556	-0.66931
138	846	B	13	2	40.2	113.4	129.85	111.889	1.499	-0.3173
138	846	B	13	2	42.7	113.43	129.88	111.918	1.455	-1.3106
138	846	B	13	2	44.8	113.45	129.9	111.938	1.466	-0.98572
138	846	B	13	2	47.3	113.47	129.92	111.957	1.511	-0.83981
138	846	B	13	2	49.5	113.49	129.94	111.976	1.534	-0.75898
138	846	B	13	2	52	113.52	129.97	112.005	1.484	-0.92248
138	846	B	13	2	53.5	113.53	129.98	112.015	1.5285	-0.78445
138	846	B	13	2	55.7	113.56	130.01	112.044	1.483	0.21541
138	846	B	13	2	58.2	113.58	130.03	112.063	1.481	-0.045448
138	846	B	13	2	60.3	113.6	130.05	112.083	1.52	-0.15987
138	846	B	13	2	62.8	113.63	130.08	112.112	1.492	-1.1532
138	846	B	13	2	65	113.65	130.1	112.131	1.473	-0.66558
138	846	B	13	2	67.5	113.67	130.12	112.15	1.562	-0.43832
138	846	B	13	2	68	113.68	130.13	112.16	1.493	-0.60455
138	846	B	13	2	68.8	113.69	130.14	112.17	1.51	-1.2361
138	846	B	13	2	71.2	113.71	130.16	112.189	1.566	0.048746
138	846	B	13	2	73.4	113.73	130.18	112.209	1.5	-1.3999
138	846	B	13	2	75.9	113.76	130.21	112.238	1.508	-1.482
138	846	B	13	2	78.1	113.78	130.23	112.257	1.511	-1.3198
138	846	B	13	2	80.6	113.81	130.26	112.286	1.545	-0.76743
138	846	B	13	2	83	113.83	130.28	112.305	1.43	-0.78694
138	846	B	13	2	84.2	113.84	130.29	112.315	1.52	-0.60551
138	846	B	13	2	86.7	113.87	130.32	112.344	1.544	-0.29716
138	846	B	13	2	88.9	113.89	130.34	112.363	1.534	-1.0624
138	846	B	13	2	91.3	113.91	130.36	112.383	1.552	-0.33076
138	846	B	13	2	93.5	113.93	130.38	112.402	1.583	-1.0797
138	846	B	13	2	96	113.96	130.41	112.431	1.588	-1.3571
138	846	B	13	2	98	113.98	130.43	112.45	1.595	-0.7448
138	846	B	13	2	99	113.99	130.44	112.46	1.481	-0.039995
138	846	B	13	2	101.3	114.01	130.46	112.479	1.559	0.43133
138	846	B	13	2	103.8	114.04	130.49	112.509	1.626	-0.96874
138	846	B	13	2	106	114.06	130.51	112.522	1.491	-1.1645
138	846	B	13	2	108.5	114.08	130.53	112.535	1.538	-1.3928
138	846	B	13	2	110.7	114.11	130.56	112.554	1.554	-1.0519
138	846	B	13	2	113.1	114.13	130.58	112.567	1.552	-0.98739
138	846	B	13	2	115.3	114.15	130.6	112.58	1.506	-0.28828
138	846	B	13	2	117.8	114.18	130.63	112.599	1.432	-0.1589
138	846	B	13	2	120	114.2	130.65	112.612	1.511	-0.59874
138	846	B	13	2	122.5	114.22	130.67	112.624	1.467	-0.69689
138	846	B	13	2	124.7	114.25	130.7	112.643	1.456	-0.29092
138	846	B	13	2	127.1	114.27	130.72	112.656	1.399	-1.4304
138	846	B	13	2	129.3	114.29	130.74	112.669	1.407	-0.47095
138	846	B	13	2	131.8	114.32	130.77	112.688	1.415	-2.0012
138	846	B	13	2	134	114.34	130.79	112.701	1.485	-0.24448
138	846	B	13	2	136.5	114.36	130.81	112.713	1.444	-0.40771
138	846	B	13	2	138.7	114.39	130.84	112.733	1.44	-0.58748
138	846	B	13	2	141.2	114.41	130.86	112.745	1.437	-1.2226
138	846	B	13	2	143.3	114.43	130.88	112.758	1.475	-0.84887
138	846	B	13	3	2.7	114.53	130.98	112.822	1.5005	-1.3234
138	846	B	13	3	5.4	114.55	131	112.835	1.5	-1.1449
138	846	B	13	3	8	114.58	131.03	112.855	1.592	-0.93689
138	846	B	13	3	9.4	114.59	131.04	112.862	1.543	-0.69038
138	846	B	13	3	11.6	114.62	131.07	112.882	1.536	-1.3095
138	846	B	13	3	14.1	114.64	131.09	112.896	1.513	-0.72424
138	846	B	13	3	16.2	114.66	131.11	112.911	1.602	-0.44817
138	846	B	13	3	18.7	114.69	131.14	112.933	1.563	-1.3927
138	846	B	13	3	20.9	114.71	131.16	112.947	1.596	-0.43322
138	846	B	13	3	23	114.73	131.18	112.962	1.561	-0.71035
138	846	B	13	3	24.8	114.75	131.2	112.977	1.558	-1.5081
138	846	B	13	3	27	114.77	131.22	112.992	1.615	-0.011763
138	846	B	13	3	29.5	114.79	131.24	113.008	1.525	-1.8834
138	846	B	13	3	31.7	114.82	131.27	113.03	1.563	-1.0544
138	846	B	13	3	34.2	114.84	131.29	113.045	1.539	-1.0061
138	846	B	13	3	36.4	114.86	131.31	113.061	1.551	-1.1368
138	846	B	13	3	38	114.88	131.33	113.076	1.568	-0.43499
138	846	B	13	3	40.2	114.9	131.35	113.092	1.568	-0.24298
138	846	B	13	3	42.7	114.93	131.38	113.116	1.587	-0.86206
138	846	B	13	3	44.8	114.95	131.4	113.132	1.57	0.081112
138	846	B	13	3	47.3	114.97	131.42	113.148	1.614	-1.0258
138	846	B	13	3	49.5	114.99	131.44	113.164	1.629	-0.63585
138	846	B	13	3	52	115.02	131.47	113.189	1.572	-0.78308
138	846	B	13	3	53.5	115.03	131.48	113.197	1.517	-0.66132
138	846	B	13	3	55.7	115.06	131.51	113.221	1.521	-0.42618
138	846	B	13	3	58.1	115.08	131.53	113.237	1.584	-0.91483
138	846	B	13	3	60.3	115.1	131.55	113.254	1.518	-0.70384
138	846	B	13	3	62.8	115.13	131.58	113.278	1.532	-0.85107
138	846	B	13	3	65	115.15	131.6	113.295	1.5265	-1.2584
138	846	B	13	3	67.4	115.17	131.62	113.311	1.568	-1.3728
138	846	B	13	3	68	115.18	131.63	113.32	1.544	-0.60182
138	846	B	13	3	68.9	115.19	131.64	113.328	1.571	-1.1781
138	846	B	13	3	71.1	115.21	131.66	113.344	1.481	-2.3989
138	846	B	13	3	73.4	115.23	131.68	113.361	1.562	-1.1303
138	846	B	13	3	75.9	115.26	131.71	113.385	1.542	-0.96839
138	846	B	13	3	78.1	115.28	131.73	113.402	1.514	-1.6848
138	846	B	13	3	80.6	115.31	131.76	113.427	1.597	-1.4904
138	846	B	13	3	83	115.33	131.78	113.443	1.628	-1.8651
138	846	B	13	3	84.2	115.34	131.79	113.452	1.534	-1.8329
138	846	B	13	3	86.7	115.37	131.82	113.477	1.612	-2.8424
138	846	B	13	3	88.9	115.39	131.84	113.493	1.504	-1.8016
138	846	B	13	3	91.3	115.41	131.86	113.51	1.603	-2.9411
138	846	B	13	3	93.5	115.43	131.88	113.527	1.58	-1.9166
138	846	B	13	3	96	115.46	131.91	113.553	1.57	-2.3241
138	846	B	13	3	98	115.48	131.93	113.57	1.561	-2.6419
138	846	B	13	3	99.6	115.5	131.95	113.587	1.515	-1.9184
138	846	B	13	3	102.1	115.52	131.97	113.604	1.583	-1.9352
138	846	B	13	3	104.3	115.54	131.99	113.621	1.474	-1.5778
138	846	B	13	3	106.8	115.57	132.02	113.647	1.475	-1.9691
138	846	B	13	3	109	115.59	132.04	113.665	1.519	-0.50525
138	846	B	13	3	111.5	115.61	132.06	113.682	1.449	-2.7186
138	846	B	13	3	113.7	115.64	132.09	113.708	1.4845	-2.5079
138	846	B	13	3	116.1	115.66	132.11	113.726	1.505	-1.5322
138	846	B	13	3	118.3	115.68	132.13	113.743	1.436	-2.3462
138	846	B	13	3	120.7	115.71	132.16	113.77	1.477	-2.4446
138	846	B	13	3	123.2	115.73	132.18	113.787	1.451	-1.9896
138	846	B	13	3	125.4	115.75	132.2	113.805	1.477	-2.4131
138	846	B	13	3	127.8	115.78	132.23	113.831	1.448	-1.6167
138	846	B	13	3	130	115.8	132.25	113.848	1.425	-2.2192
138	846	B	13	3	132.5	115.82	132.27	113.867	1.464	-1.3899
138	846	B	13	3	134.7	115.85	132.3	113.897	1.469	-2.2368
138	846	B	13	3	137.2	115.87	132.32	113.918	1.413	-1.9282
138	846	B	13	3	139.4	115.89	132.34	113.938	1.505	-2.2704
138	846	B	13	3	141.8	115.92	132.37	113.969	1.463	-2.2712
138	846	B	13	3	144	115.94	132.39	113.99	1.487	-2.4507
138	846	B	13	3	146.5	115.96	132.41	114.011	1.513	-1.1821
138	846	B	13	4	2.8	116.03	132.48	114.084	1.513	-1.3304
138	846	B	13	4	5.6	116.06	132.51	114.116	1.484	-0.51765
138	846	B	13	4	8	116.08	132.53	114.137	1.54	-1.8253
138	846	B	13	4	9.5	116.09	132.54	114.148	1.501	-1.2994
138	846	B	13	4	11.7	116.12	132.57	114.18	1.577	-1.8046
138	846	B	13	4	14.2	116.14	132.59	114.201	1.5415	-2.1468
138	846	B	13	4	16.4	116.16	132.61	114.222	1.508	-1.5128
138	846	B	13	4	18.8	116.19	132.64	114.254	1.472	-0.99293
138	846	B	13	4	21	116.21	132.66	114.275	1.581	-0.94465
138	846	B	13	4	23	116.23	132.68	114.296	1.529	-1.7316
138	846	B	13	4	24.9	116.25	132.7	114.317	1.523	-1.564
138	846	B	13	4	27.1	116.27	132.72	114.339	1.5255	-0.32794
138	846	B	13	4	29.6	116.3	132.75	114.37	1.461	-1.3212
138	846	B	13	4	31.8	116.32	132.77	114.392	1.504	-1.2404
138	846	B	13	4	34.3	116.34	132.79	114.413	1.558	-1.0782
138	846	B	13	4	36.5	116.36	132.81	114.434	1.551	-1.7459
138	846	B	13	4	38	116.38	132.83	114.455	1.546	-1.2366
138	846	B	13	4	40.4	116.4	132.85	114.476	1.547	-0.7056
138	846	B	13	4	42.6	116.43	132.88	114.508	1.507	-1.5037
138	846	B	13	4	44.9	116.45	132.9	114.529	1.607	-1.732
138	846	B	13	4	47.4	116.47	132.92	114.549	1.549	-1.1305
138	846	B	13	4	49.6	116.5	132.95	114.58	1.59	-0.72451
138	846	B	13	4	52.1	116.52	132.97	114.6	1.592	-0.90401
138	846	B	13	4	53.5	116.53	132.98	114.61	1.514	-0.67377
138	846	B	13	4	55.7	116.56	133.01	114.638	1.54	-1.3606
138	846	B	13	4	58.2	116.58	133.03	114.657	1.56	-0.82424
138	846	B	13	4	60.4	116.6	133.05	114.676	1.5	-0.2553
138	846	B	13	4	62.8	116.63	133.08	114.704	1.535	0.49237
138	846	B	13	4	65	116.65	133.1	114.722	1.57	0.28032
138	846	B	13	4	68	116.68	133.13	114.749	1.531	-0.089275
138	846	B	13	4	68.9	116.69	133.14	114.758	1.598	-0.43665
138	846	B	13	4	71.1	116.71	133.16	114.776	1.508	0.97838
138	846	B	13	4	73.6	116.74	133.19	114.804	1.521	1.0589
138	846	B	13	4	75.8	116.76	133.21	114.822	1.525	0.58656
138	846	B	13	4	78.2	116.78	133.23	114.84	1.532	0.049099
138	846	B	13	4	80.4	116.8	133.25	114.858	1.614	-0.097865
138	846	B	13	4	83	116.83	133.28	114.885	1.556	0.66064
138	846	B	13	4	84.2	116.84	133.29	114.894	1.566	1.5607
138	846	B	13	4	86.7	116.87	133.32	114.921	1.538	0.66501
138	846	B	13	4	88.9	116.89	133.34	114.939	1.524	0.94109
138	846	B	13	4	91.4	116.91	133.36	114.957	1.563	0.89175
138	846	B	13	4	93.6	116.94	133.39	114.984	1.532	0.69571
138	846	B	13	4	96	116.96	133.41	115.002	1.589	0.64637
138	846	B	13	4	98	116.98	133.43	115.02	1.527	0.19297
138	846	B	13	4	99.7	117	133.45	115.039	1.497	-0.038059
138	846	B	13	4	102	117.02	133.47	115.057	1.559	-1.4379
138	846	B	13	4	104.3	117.04	133.49	115.075	1.515	-0.62486
138	846	B	13	4	106.7	117.07	133.52	115.102	1.615	-1.0975
138	846	B	13	4	109	117.09	133.54	115.12	1.542	-0.67499
138	846	B	13	4	111.3	117.11	133.56	115.138	1.5825	-0.040961
138	846	B	13	4	113.7	117.14	133.59	115.165	1.597	-0.98545
138	846	B	13	4	116	117.16	133.61	115.184	1.557	-0.5304
138	846	B	13	4	118.3	117.18	133.63	115.202	1.529	-0.67737
138	846	B	13	4	120.7	117.21	133.66	115.229	1.533	-1.7358
138	846	B	13	4	123	117.23	133.68	115.247	1.548	-1.5085
138	846	B	13	4	125.3	117.25	133.7	115.266	1.495	-1.265
138	846	B	13	4	127.7	117.28	133.73	115.294	1.57	-1.3146
138	846	B	13	4	130	117.3	133.75	115.312	1.573	-1.2663
138	846	B	13	4	132.3	117.32	133.77	115.331	1.587	-1.5759
138	846	B	13	4	134.7	117.35	133.8	115.363	1.565	-1.0561
138	846	B	13	4	137	117.37	133.82	115.384	1.538	-1.74
138	846	B	13	4	139.4	117.39	133.84	115.405	1.505	-1.3825
138	846	B	13	4	141.7	117.42	133.87	115.437	1.557	-1.725
138	846	B	13	4	144	117.44	133.89	115.458	1.588	-0.96083
138	846	B	13	5	2.6	117.53	133.98	115.554	1.602	-0.41
138	846	B	13	5	5.3	117.55	134	115.575	1.523	-0.52442
138	846	B	13	5	8	117.58	134.03	115.607	1.562	-1.1354
138	846	B	13	5	10	117.6	134.05	115.629	1.621	-0.75353
138	846	B	13	5	12.2	117.62	134.07	115.65	1.554	-0.86795
138	846	B	13	5	14.7	117.65	134.1	115.682	1.52	-0.283
138	846	B	13	5	16.9	117.67	134.12	115.703	1.5585	-1.032
138	846	B	13	5	19.3	117.69	134.14	115.724	1.578	-0.49557
138	846	B	13	5	21.5	117.71	134.16	115.745	1.587	0.33371
138	846	B	13	5	23	117.73	134.18	115.767	1.585	0.024034
138	846	B	13	5	23.7	117.74	134.19	115.777	1.596	-0.69214
138	846	B	13	5	28.4	117.78	134.23	115.798	1.537	-1.4091
138	846	B	13	5	26.2	117.76	134.21	115.82	1.521	0.12087
138	846	B	13	5	30.9	117.81	134.26	115.851	1.566	-0.90551
138	846	B	13	5	33	117.83	134.28	115.873	1.477	-0.51554
138	846	B	13	5	35.5	117.85	134.3	115.894	1.544	-0.92283
138	846	B	13	5	38	117.88	134.33	115.925	1.578	-0.60635
138	846	B	13	5	39.9	117.9	134.35	115.946	1.574	0.0032779
138	846	B	13	5	42.3	117.92	134.37	115.967	1.51	-0.53418
138	846	B	13	5	44.5	117.94	134.39	115.988	1.615	0.97847
138	846	B	13	5	47	117.97	134.42	116.016	1.5715	0.50582
138	846	B	13	5	49.2	117.99	134.44	116.034	1.549	-0.61738
138	846	B	13	5	51.7	118.02	134.47	116.062	1.625	-0.68326
138	846	B	13	5	53	118.03	134.48	116.071	1.533	0.17883
138	846	B	13	5	53.7	118.04	134.49	116.08	1.535	-0.96039
138	846	B	13	5	56.2	118.06	134.51	116.098	1.463	-1.0423
138	846	B	13	5	58.4	118.08	134.53	116.116	1.525	-0.18045
138	846	B	13	5	60.9	118.11	134.56	116.144	1.472	-0.58801
138	846	B	13	5	65.3	118.15	134.6	116.18	1.543	-0.62161
138	846	B	13	5	68	118.18	134.63	116.207	1.543	-1.322
138	846	B	13	5	69.8	118.2	134.65	116.225	1.554	-1.1273
138	846	B	13	5	72.1	118.22	134.67	116.243	1.565	-1.616
138	846	B	13	5	74.5	118.24	134.69	116.261	1.551	-0.78669
138	846	B	13	5	76.8	118.27	134.72	116.288	1.572	-0.85256
138	846	B	13	5	79.1	118.29	134.74	116.306	1.577	-0.46259
138	846	B	13	5	81.5	118.31	134.76	116.324	1.586	-1.781
138	846	B	13	5	83	118.33	134.78	116.341	1.601	-1.2772
138	846	B	13	5	83.6	118.34	134.79	116.35	1.567	-1.5378
138	846	B	13	5	85.9	118.36	134.81	116.368	1.554	0.17012
138	846	B	13	5	88.2	118.38	134.83	116.386	1.557	-0.70903
138	846	B	13	5	90.6	118.41	134.86	116.413	1.497	-1.3281
138	846	B	13	5	92.9	118.43	134.88	116.431	1.518	-1.6378
138	846	B	13	5	95.3	118.45	134.9	116.449	1.569	-1.4268
138	846	B	13	5	98	118.48	134.93	116.476	1.513	-0.89878
138	846	B	13	5	99.8	118.5	134.95	116.494	1.566	-0.51694
138	846	B	13	5	102.1	118.52	134.97	116.512	1.471	-0.90797
138	846	B	13	5	104.4	118.54	134.99	116.53	1.522	0.16537
138	846	B	13	5	106.8	118.57	135.02	116.556	1.565	-0.94183
138	846	B	13	5	109.1	118.59	135.04	116.574	1.554	-0.16136
138	846	B	13	5	111.5	118.61	135.06	116.592	1.547	0.81435
138	846	B	13	5	113.8	118.64	135.09	116.619	1.5755	-0.55318
138	846	B	13	5	116.1	118.66	135.11	116.638	1.516	-1.0581
138	846	B	13	5	118.5	118.68	135.13	116.657	1.593	0.29184
138	846	B	13	5	120.8	118.71	135.16	116.686	1.58	-0.27842
138	846	B	13	5	123.1	118.73	135.18	116.705	1.567	0.17663
138	846	B	13	5	125.5	118.75	135.2	116.724	1.578	0.64795
138	846	B	13	5	127.8	118.78	135.23	116.753	1.599	0.90749
138	846	B	13	5	130.1	118.8	135.25	116.772	1.621	-0.05301
138	846	B	13	5	132.5	118.82	135.27	116.791	1.65	0.69492
138	846	B	13	5	134.8	118.85	135.3	116.819	1.565	0.56396
138	846	B	13	5	137.2	118.87	135.32	116.837	1.594	-0.49417
138	846	B	13	5	139.5	118.89	135.34	116.855	1.597	-1.0642
138	846	B	13	5	141.8	118.92	135.37	116.883	1.593	-0.57684
138	846	B	13	5	144.2	118.94	135.39	116.9	1.623	-1.5699
138	846	B	13	6	2.8	119.03	135.48	116.98	1.597	-0.75872
138	846	B	13	6	5.5	119.06	135.51	117.006	1.551	-0.93849
138	846	B	13	6	8	119.08	135.53	117.024	1.581	-0.58106
138	846	B	13	6	10.2	119.1	135.55	117.041	1.531	-0.32126
138	846	B	13	6	12.4	119.12	135.57	117.059	1.558	-0.48449
138	846	B	13	6	14.9	119.15	135.6	117.085	1.524	-0.55037
138	846	B	13	6	17.1	119.17	135.62	117.103	1.486	-0.3231
138	846	B	13	6	19.5	119.19	135.64	117.12	1.5685	-1.5439
138	846	B	13	6	21.7	119.22	135.67	117.146	1.516	-0.8939
138	846	B	13	6	23	119.23	135.68	117.155	1.512	-0.61756
138	846	B	13	6	23.8	119.24	135.69	117.164	1.478	-0.39003
138	846	B	13	6	26.3	119.26	135.71	117.181	1.559	-0.48818
138	846	B	13	6	28.5	119.28	135.73	117.199	1.472	-1.1395
138	846	B	13	6	31	119.31	135.76	117.225	1.573	-0.39188
138	846	B	13	6	33.2	119.33	135.78	117.243	1.46	-0.42495
138	846	B	13	6	35.6	119.36	135.81	117.269	1.501	-1.1579
138	846	B	13	6	38	119.38	135.83	117.286	1.543	-0.71101
138	846	B	13	6	40	119.4	135.85	117.304	1.519	-1.8749
138	846	B	13	6	42.5	119.42	135.87	117.321	1.508	-1.6639
138	846	B	13	6	44.7	119.45	135.9	117.347	1.534	-1.4369
138	846	B	13	6	47.2	119.47	135.92	117.364	1.517	-0.81914
138	846	B	13	6	49.4	119.49	135.94	117.382	1.5255	-1.259
138	846	B	13	6	51.7	119.52	135.97	117.408	1.537	-0.69029
138	846	B	13	6	53	119.53	135.98	117.417	1.549	-1.0322
138	846	B	13	6	53.7	119.54	135.99	117.425	1.61	-1.4718
138	846	B	13	6	56.1	119.56	136.01	117.443	1.596	-1.0981
138	846	B	13	6	58.3	119.58	136.03	117.46	1.585	-0.10613
138	846	B	13	6	60.8	119.61	136.06	117.486	1.5	-0.69267
138	846	B	13	6	63	119.63	136.08	117.503	1.586	-1.6044
138	846	B	13	6	65.4	119.65	136.1	117.521	1.573	0.18489
138	846	B	13	6	68	119.68	136.13	117.547	1.558	-1.2152
138	846	B	13	6	69.8	119.7	136.15	117.565	1.565	-0.82521
138	846	B	13	6	72.2	119.72	136.17	117.582	1.547	-0.71184
138	846	B	13	6	74.4	119.74	136.19	117.6	1.617	-0.5822
138	846	B	13	6	76.9	119.77	136.22	117.626	1.566	-1.0548
138	846	B	13	6	79.1	119.79	136.24	117.643	1.635	0.051035
138	846	B	13	6	81.6	119.82	136.27	117.67	1.545	-0.29144
138	846	B	13	6	83	119.83	136.28	117.678	1.588	-0.45441
138	846	B	13	6	83.7	119.84	136.29	117.687	1.561	0.45648
138	846	B	13	6	85.9	119.86	136.31	117.705	1.554	-0.53656
138	846	B	13	6	88.4	119.88	136.33	117.722	1.547	0.048661
138	846	B	13	6	90.6	119.91	136.36	117.748	1.573	0.031599
138	846	B	13	6	93	119.93	136.38	117.766	1.512	-0.68484
138	846	B	13	6	95.2	119.95	136.4	117.785	1.671	-0.18098
138	846	B	13	6	98	119.98	136.43	117.813	1.596	0.50974
138	846	B	13	6	99.9	120	136.45	117.831	1.585	-0.88194
138	846	B	13	6	102.1	120.02	136.47	117.85	1.592	0.45173
138	846	B	13	6	104.5	120.04	136.49	117.869	1.595	0.14206
138	846	B	13	6	106.7	120.07	136.52	117.897	1.587	0.17381
138	846	B	13	6	109.1	120.09	136.54	117.916	1.561	0.075662
138	846	B	13	6	111.6	120.12	136.57	117.945	1.545	0.13995
138	846	B	13	6	113.8	120.14	136.59	117.965	1.557	-0.36497
138	846	B	13	6	116.2	120.16	136.61	117.985	1.5895	1.4406
138	846	B	13	6	118.4	120.18	136.63	118.005	1.559	0.75666
138	846	B	13	6	120.9	120.21	136.66	118.035	1.524	-0.39936
138	846	B	13	6	123.1	120.23	136.68	118.056	1.512	0.12078
138	846	B	13	6	125.6	120.26	136.71	118.087	1.535	0.39659
138	846	B	13	6	127.8	120.28	136.73	118.107	1.557	0.31471
138	846	B	13	6	130.3	120.3	136.75	118.127	1.525	0.85111
138	846	B	13	6	132.5	120.32	136.77	118.148	1.472	-0.10938
138	846	B	13	6	134.9	120.35	136.8	118.178	1.497	1.045
138	846	B	13	6	137.1	120.37	136.82	118.199	1.541	0.11709
138	846	B	13	6	139.6	120.4	136.85	118.23	1.615	-0.59962
138	846	B	13	6	141.8	120.42	136.87	118.25	1.533	-0.42117
138	846	B	13	6	144.3	120.44	136.89	118.27	1.519	0.31049
138	846	B	13	7	2.5	120.52	136.97	118.352	1.498	0.6826
138	846	B	13	7	5.3	120.55	137	118.383	1.5265	-0.13172
138	846	B	13	7	8	120.58	137.03	118.413	1.491	0.59153
138	846	B	13	7	9.8	120.6	137.05	118.434	1.45	-0.14931
138	846	B	13	7	12.3	120.62	137.07	118.454	1.494	-0.18238
138	846	B	13	7	14.5	120.64	137.09	118.474	1.499	0.45165
138	846	B	13	7	16.9	120.67	137.12	118.505	1.475	-0.0047243
138	846	B	13	7	19.1	120.69	137.14	118.525	1.462	-0.3144
138	846	B	13	7	21.6	120.72	137.17	118.556	1.504	1.1329
138	846	B	13	7	23	120.73	137.18	118.566	1.437	0.0099634
138	846	B	13	7	23.6	120.74	137.19	118.576	1.519	0.2863
138	846	B	13	7	26.1	120.76	137.21	118.597	1.483	1.1969
138	846	B	13	7	28.4	120.78	137.23	118.617	1.431	0.12254
138	846	B	13	7	30.8	120.81	137.26	118.647	1.442	0.25191
138	846	B	13	7	33	120.83	137.28	118.668	1.446	0.3002
[truncated: 1,863 more rows]
