# Supplementary material for: A Revised Mid-Pliocene Composite Section for ODP Site 846
Source: Copernicus journal article supplement (doi:10.5194/cp-2019-133), 2020-02-21
Supplement: Supplementary file 4 [file Table S3 846C grape composite.xls]

## Sheet: Sheet1
TABLE S3: 846C GRAPE COMPOSITE
Leg	Site	Hole	core	section	cm	mbsf	mcd shipboard	log depth	WBD	WBD detrended and normalized
138	846	C	9	4	139.5	84.39	95.67	81.512	1.355	-0.973666
138	846	C	9	4	141.8	84.42	95.7	81.5353	1.345	-1.13654
138	846	C	9	4	144.2	84.44	95.72	81.5509	1.409	-0.0997874
138	846	C	9	5	2.6	84.53	95.81	81.6209	1.356	-0.961196
138	846	C	9	5	5.4	84.55	95.83	81.6365	1.378	-0.605161
138	846	C	9	5	8	84.58	95.86	81.6598	1.3617	-0.870688
138	846	C	9	5	9.3	84.59	95.87	81.6676	1.342	-1.1897
138	846	C	9	5	11.5	84.61	95.89	81.6831	1.364	-0.83367
138	846	C	9	5	14	84.64	95.92	81.7065	1.363	-0.850678
138	846	C	9	5	16.2	84.66	95.94	81.7221	1.409	-0.10566
138	846	C	9	5	18.7	84.69	95.97	81.7454	1.465	0.801167
138	846	C	9	5	20.9	84.71	95.99	81.761	1.46	0.719596
138	846	C	9	5	23	84.73	96.01	81.7766	1.4143	-0.0210876
138	846	C	9	5	24.8	84.75	96.03	81.7921	1.459	0.702321
138	846	C	9	5	27	84.77	96.05	81.8076	1.449	0.53971
138	846	C	9	5	29.3	84.79	96.07	81.8232	1.526	1.78716
138	846	C	9	5	31.8	84.82	96.1	81.8466	1.459	0.700452
138	846	C	9	5	34	84.84	96.12	81.8622	1.413	-0.0456342
138	846	C	9	5	36.5	84.86	96.14	81.8777	1.406	-0.159621
138	846	C	9	5	38	84.88	96.16	81.8933	1.463	0.763681
138	846	C	9	5	40.1	84.9	96.18	81.9088	1.449	0.53624
138	846	C	9	5	42.6	84.93	96.21	81.9322	1.496	1.2972
138	846	C	9	5	44.8	84.95	96.23	81.9478	1.444	0.453867
138	846	C	9	5	47.3	84.97	96.25	81.9633	1.453	0.599203
138	846	C	9	5	49.5	84.99	96.27	81.9789	1.525	1.76562
138	846	C	9	5	51.9	85.02	96.3	82.0023	1.442	0.419584
138	846	C	9	5	53	85.03	96.31	82.01	1.441	0.403109
138	846	C	9	5	55.6	85.06	96.34	82.0333	1.4335	0.28075
138	846	C	9	5	60.3	85.1	96.38	82.0645	1.51	1.51957
138	846	C	9	5	62.6	85.13	96.41	82.0883	1.456	0.643555
138	846	C	9	5	64.9	85.15	96.43	82.1045	1.421	0.0757529
138	846	C	9	5	67.3	85.17	96.45	82.1209	1.466	0.804564
138	846	C	9	5	68	85.18	96.46	82.129	1.4286	0.528767
138	846	C	9	5	68.7	85.19	96.47	82.1372	1.459	0.690576
138	846	C	9	5	71	85.21	96.49	82.1535	1.467	0.819703
138	846	C	9	5	73.4	85.23	96.51	82.1698	1.457	0.657093
138	846	C	9	5	75.6	85.26	96.54	82.1942	1.509	1.49908
138	846	C	9	5	78	85.28	96.56	82.2106	1.492	1.22303
138	846	C	9	5	80.3	85.3	96.58	82.2269	1.449	0.525563
138	846	C	9	5	83	85.33	96.61	82.2514	1.4357	0.308661
138	846	C	9	5	84.1	85.34	96.62	82.2594	1.453	0.589327
138	846	C	9	5	86.4	85.36	96.64	82.2758	1.447	0.491547
138	846	C	9	5	88.7	85.39	96.67	82.3003	1.449	0.523162
138	846	C	9	5	91.1	85.41	96.69	82.3166	1.419	0.0363974
138	846	C	9	5	93.4	85.43	96.71	82.3329	1.41	-0.110005
138	846	C	9	5	95.7	85.46	96.74	82.3573	1.427	0.164725
138	846	C	9	5	98	85.48	96.76	82.3736	1.415	-0.0303007
138	846	C	9	5	99.5	85.49	96.77	82.3818	1.433	0.261169
138	846	C	9	5	101.9	85.52	96.8	82.4063	1.415	-0.0313685
138	846	C	9	5	104.2	85.54	96.82	82.4225	1.453	0.583989
138	846	C	9	5	106.6	85.57	96.85	82.447	1.433	0.259035
138	846	C	9	5	108.9	85.59	96.87	82.4636	1.371	-0.746374
138	846	C	9	5	111.2	85.61	96.89	82.4813	1.41	-0.114809
138	846	C	9	5	113.6	85.64	96.92	82.5094	1.371	-0.747708
138	846	C	9	5	115.9	85.66	96.94	82.5283	1.405	-0.197182
138	846	C	9	5	118.2	85.68	96.96	82.5472	1.393	-0.392208
138	846	C	9	5	120.6	85.71	96.99	82.5754	1.37	-0.765784
138	846	C	9	5	122.9	85.73	97.01	82.595	1.402	-0.247674
138	846	C	9	5	125.3	85.75	97.03	82.6144	1.394	-0.377869
138	846	C	9	5	127.6	85.78	97.06	82.6436	1.368	-0.800068
138	846	C	9	5	129.9	85.8	97.08	82.6631	1.298	-1.93514
138	846	C	9	5	132.3	85.82	97.1	82.6825	1.344	-1.19012
138	846	C	9	5	134.6	85.85	97.13	82.712	1.393	-0.396746
138	846	C	9	5	136.9	85.87	97.15	82.7316	1.389	-0.46211
138	846	C	9	5	139.3	85.89	97.17	82.7513	1.401	-0.268152
138	846	C	9	5	141.6	85.92	97.2	82.7808	1.357	-0.982089
138	846	C	9	5	144	85.94	97.22	82.8005	1.32	-1.58231
138	846	C	9	6	2.7	86.03	97.31	82.8891	1.38	-0.61225
138	846	C	9	6	5.5	86.06	97.34	82.9189	1.333	-1.37481
138	846	C	9	6	8	86.08	97.36	82.9389	1.3622	-0.902621
138	846	C	9	6	9.4	86.09	97.37	82.9489	1.373	-0.727305
138	846	C	9	6	11.8	86.12	97.4	82.9787	1.384	-0.549821
138	846	C	9	6	14	86.14	97.42	82.9986	1.417	-0.0155017
138	846	C	9	6	16.5	86.17	97.45	83.0284	1.373	-0.72944
138	846	C	9	6	18.7	86.19	97.47	83.0483	1.343	-1.2162
138	846	C	9	6	21.1	86.21	97.49	83.0682	1.354	-1.03845
138	846	C	9	6	23	86.23	97.51	83.0881	1.3657	-0.849898
138	846	C	9	6	24.8	86.25	97.53	83.1081	1.337	-1.31505
138	846	C	9	6	27.3	86.27	97.55	83.1282	1.408	-0.164841
138	846	C	9	6	29.5	86.29	97.57	83.1488	1.339	-1.2837
138	846	C	9	6	32	86.32	97.6	83.1796	1.358	-0.976558
138	846	C	9	6	34.2	86.34	97.62	83.2001	1.329	-1.44711
138	846	C	9	6	36.6	86.37	97.65	83.231	1.324	-1.52895
138	846	C	9	6	38.1	86.38	97.66	83.2413	1.3655	-0.856603
138	846	C	9	6	40.3	86.4	97.68	83.2618	1.318	-1.627
138	846	C	9	6	42.6	86.43	97.71	83.2927	1.307	-1.80609
138	846	C	9	6	45	86.45	97.73	83.3133	1.313	-1.70938
138	846	C	9	6	47.3	86.47	97.75	83.3338	1.391	-0.445709
138	846	C	9	6	49.6	86.5	97.78	83.3647	1.358	-0.981363
138	846	C	9	6	52	86.52	97.8	83.3852	1.354	-1.04673
138	846	C	9	6	53.4	86.53	97.81	83.3954	1.3448	-1.19556
138	846	C	9	6	55.8	86.56	97.84	83.4258	1.369	-0.80468
138	846	C	9	6	58.1	86.58	97.86	83.4462	1.277	-2.29632
138	846	C	9	6	60.5	86.6	97.88	83.4665	1.352	-1.08128
138	846	C	9	6	62.8	86.63	97.91	83.497	1.367	-0.838964
138	846	C	9	6	65.1	86.65	97.93	83.5172	1.312	-1.73092
138	846	C	9	6	67.4	86.67	97.95	83.5376	1.338	-1.31005
138	846	C	9	6	68	86.68	97.96	83.5477	1.3402	-1.27466
138	846	C	9	6	68.9	86.69	97.97	83.5579	1.363	-0.905396
138	846	C	9	6	71.2	86.71	97.99	83.5781	1.325	-1.52182
138	846	C	9	6	73.5	86.74	98.02	83.6083	1.385	-0.550162
138	846	C	9	6	75.9	86.76	98.04	83.6284	1.35	-1.11796
138	846	C	9	6	78.2	86.78	98.06	83.6486	1.385	-0.55123
138	846	C	9	6	80.5	86.81	98.09	83.6787	1.358	-0.989638
138	846	C	9	6	83	86.83	98.11	83.6988	1.3803	-0.6282
138	846	C	9	6	84.3	86.84	98.12	83.7089	1.411	-0.131433
138	846	C	9	6	86.7	86.87	98.15	83.7391	1.406	-0.213271
138	846	C	9	6	89	86.89	98.17	83.7591	1.448	0.466917
138	846	C	9	6	91.3	86.91	98.19	83.7807	1.342	-1.25163
138	846	C	9	6	93.7	86.94	98.22	83.8148	1.46	0.660073
138	846	C	9	6	96	86.96	98.24	83.8358	1.474	0.886447
138	846	C	9	6	98.3	86.98	98.26	83.8566	1.457	0.610383
138	846	C	9	6	100.7	87.01	98.29	83.8876	1.521	1.64687
138	846	C	9	6	103	87.03	98.31	83.9083	1.451	0.511802
138	846	C	9	6	105.4	87.05	98.33	83.9291	1.469	0.803006
138	846	C	9	6	107.7	87.08	98.36	83.9601	1.502	1.33705
138	846	C	9	6	110	87.1	98.38	83.9808	1.459	0.639595
138	846	C	9	6	112.4	87.12	98.4	84.0015	1.448	0.460778
138	846	C	9	6	114.7	87.15	98.43	84.0326	1.402	-0.285576
138	846	C	9	6	117	87.17	98.45	84.0534	1.429	0.151497
138	846	C	9	6	119.4	87.19	98.47	84.0741	1.457	0.604777
138	846	C	9	6	121.7	87.22	98.5	84.1051	1.509	1.44678
138	846	C	9	6	124	87.24	98.52	84.1259	1.457	0.603443
138	846	C	9	6	126.4	87.26	98.54	84.1466	1.485	1.05672
138	846	C	9	6	128.7	87.29	98.57	84.1776	1.44	0.326579
138	846	D	10	1	13	87.43	98.73	84.2806	1.44	0.333358
138	846	D	10	1	14.2	87.44	98.74	84.2888	1.424	0.0878831
138	846	D	10	1	16.6	87.47	98.77	84.3134	1.494	1.15975
138	846	D	10	1	18	87.48	98.78	84.3216	1.445	0.408568
138	846	D	10	1	20.4	87.5	98.8	84.338	1.475	0.867738
138	846	D	10	1	23	87.53	98.83	84.3626	1.449	0.468453
138	846	D	10	1	24	87.54	98.84	84.3708	1.44	0.33025
138	846	D	10	1	26.3	87.56	98.86	84.3872	1.372	-0.712382
138	846	D	10	1	28	87.58	98.88	84.4036	1.444	0.390418
138	846	D	10	1	29.7	87.6	98.9	84.42	1.456	0.573747
138	846	D	10	1	32	87.62	98.92	84.4364	1.49	1.09422
138	846	D	10	1	33.5	87.63	98.93	84.4446	1.442	0.358356
138	846	D	10	1	35.9	87.66	98.96	84.4692	1.461	0.648674
138	846	D	10	1	38	87.68	98.98	84.4856	1.439	0.31097
138	846	D	10	1	39.7	87.7	99	84.502	1.437	0.279755
138	846	D	10	1	42	87.72	99.02	84.5184	1.383	-0.548333
138	846	D	10	1	43	87.73	99.03	84.5266	1.426	0.110338
138	846	D	10	1	43.5	87.74	99.04	84.5348	1.481	0.952904
138	846	D	10	1	45.8	87.76	99.06	84.5512	1.378	-0.626086
138	846	D	10	1	48	87.78	99.08	84.5676	1.436	0.262171
138	846	D	10	1	49.6	87.8	99.1	84.5845	1.413	-0.0908584
138	846	D	10	1	52	87.82	99.12	84.6017	1.437	0.276365
138	846	D	10	1	53.5	87.83	99.13	84.6103	1.424	0.0768636
138	846	D	10	1	55.8	87.86	99.16	84.636	1.448	0.443804
138	846	D	10	1	58	87.88	99.18	84.6532	1.44	0.320643
138	846	D	10	1	59.6	87.9	99.2	84.6704	1.448	0.442674
138	846	D	10	1	62	87.92	99.22	84.6876	1.438	0.288864
138	846	D	10	1	63.5	87.93	99.23	84.6962	1.42	0.0127401
138	846	D	10	1	65.8	87.96	99.26	84.7219	1.458	0.594224
138	846	D	10	1	68	87.98	99.28	84.7391	1.417	-0.0346462
138	846	D	10	1	69.5	87.99	99.29	84.7477	1.373	-0.709207
138	846	D	10	1	71.8	88.02	99.32	84.7735	1.396	-0.357591
138	846	D	10	1	73.2	88.03	99.33	84.7821	1.409	-0.158655
138	846	D	10	1	75.5	88.06	99.36	84.8079	1.451	0.484127
138	846	D	10	1	78	88.08	99.38	84.825	1.418	-0.0221472
138	846	D	10	1	79.4	88.09	99.39	84.8336	1.388	-0.482165
138	846	D	10	1	81.7	88.12	99.42	84.8594	1.415	-0.0692509
138	846	D	10	1	83.1	88.13	99.43	84.868	1.42	0.00708912
138	846	D	10	1	85.4	88.15	99.45	84.8852	1.453	0.512233
138	846	D	10	1	88	88.18	99.48	84.911	1.451	0.480736
138	846	D	10	1	89.2	88.19	99.49	84.9196	1.432	0.189288
138	846	D	10	1	91.5	88.21	99.51	84.9367	1.446	0.403266
138	846	D	10	1	93	88.23	99.53	84.954	1.449	0.448675
138	846	D	10	1	95.3	88.25	99.55	84.9721	1.418	-0.0269505
138	846	D	10	1	98	88.28	99.58	84.9991	1.451	0.477911
138	846	D	10	1	99.2	88.29	99.59	85.0082	1.426	0.0945154
138	846	D	10	1	101.5	88.31	99.61	85.0262	1.407	-0.197215
138	846	D	10	1	103	88.33	99.63	85.0442	1.432	0.185332
138	846	D	10	1	105.3	88.35	99.65	85.0623	1.357	-0.964571
138	846	D	10	1	108	88.38	99.68	85.0893	1.429	0.137946
138	846	D	10	1	109.1	88.39	99.69	85.0984	1.343	-1.18024
138	846	D	10	1	111.4	88.41	99.71	85.1164	1.438	0.275019
138	846	D	10	1	113.7	88.44	99.74	85.1435	1.359	-0.936465
138	846	D	10	1	116.1	88.46	99.76	85.1615	1.407	-0.201454
138	846	D	10	1	118.4	88.48	99.78	85.1796	1.403	-0.263317
138	846	D	10	1	120.7	88.51	99.81	85.2066	1.349	-1.09169
138	846	D	10	1	123.1	88.53	99.83	85.2247	1.348	-1.10758
138	846	D	10	1	125.4	88.55	99.85	85.2427	1.419	-0.0201024
138	846	D	10	1	127.7	88.58	99.88	85.2698	1.337	-1.27756
138	846	D	10	1	130.1	88.6	99.9	85.2878	1.348	-1.10956
138	846	D	10	1	132.4	88.62	99.92	85.3059	1.383	-0.573763
138	846	D	10	1	134.7	88.65	99.95	85.3329	1.426	0.0843437
138	846	D	10	1	137.1	88.67	99.97	85.351	1.438	0.267673
138	846	D	10	1	139.4	88.69	99.99	85.369	1.382	-0.591065
138	846	D	10	1	141.7	88.72	100.02	85.3961	1.399	-0.331396
138	846	D	10	1	144.1	88.74	100.04	85.4138	1.442	0.326993
138	846	D	10	2	3	88.83	100.13	85.4924	1.505	1.28989
138	846	D	10	2	4.6	88.85	100.15	85.5099	1.545	1.90231
138	846	D	10	2	7.1	88.87	100.17	85.5273	1.473	0.79838
138	846	D	10	2	8	88.88	100.18	85.536	1.48	0.905369
138	846	D	10	2	8.6	88.89	100.19	85.5448	1.446	0.384053
138	846	D	10	2	10.8	88.91	100.21	85.5622	1.476	0.843223
138	846	D	10	2	13	88.93	100.23	85.5797	1.495	1.13382
138	846	D	10	2	14.7	88.95	100.25	85.5972	1.493	1.10261
138	846	D	10	2	16.9	88.97	100.27	85.6146	1.472	0.78023
138	846	D	10	2	18.3	88.98	100.28	85.6234	1.502	1.23968
138	846	D	10	2	20.7	89.01	100.31	85.6495	1.46	0.595205
138	846	D	10	2	23	89.03	100.33	85.667	1.506	1.29957
138	846	D	10	2	24.6	89.05	100.35	85.6845	1.517	1.46757
138	846	D	10	2	26.8	89.07	100.37	85.7019	1.503	1.25246
138	846	D	10	2	28	89.08	100.38	85.7107	1.493	1.09894
138	846	D	10	2	30.3	89.1	100.4	85.7281	1.448	0.408768
138	846	D	10	2	33	89.13	100.43	85.7543	1.505	1.28142
138	846	D	10	2	34	89.14	100.44	85.763	1.425	0.0551743
138	846	D	10	2	36.4	89.16	100.46	85.7805	1.407	-0.221232
138	846	D	10	2	38	89.18	100.48	85.798	1.407	-0.221797
138	846	D	10	2	40.1	89.2	100.5	85.8154	1.48	0.896327
138	846	D	10	2	42.5	89.22	100.52	85.8329	1.493	1.09498
138	846	D	10	2	43	89.23	100.53	85.8416	1.464	0.650287
138	846	D	10	2	43.9	89.24	100.54	85.8503	1.44	0.282217
138	846	D	10	2	46.4	89.26	100.56	85.8678	1.458	0.557493
138	846	D	10	2	48	89.28	100.58	85.8853	1.412	-0.148
138	846	D	10	2	50	89.3	100.6	85.9027	1.396	-0.393757
138	846	D	10	2	53	89.33	100.63	85.9289	1.405	-0.256684
138	846	D	10	2	53.9	89.34	100.64	85.9376	1.39	-0.486835
138	846	D	10	2	56	89.36	100.66	85.9551	1.405	-0.257532
138	846	D	10	2	58	89.38	100.68	85.9726	1.425	0.0483931
138	846	D	10	2	59.8	89.4	100.7	85.9906	1.407	-0.228013
138	846	D	10	2	62.3	89.42	100.72	86.0086	1.432	0.154535
138	846	D	10	2	63	89.43	100.73	86.0177	1.424	0.0316558
138	846	D	10	2	63.7	89.44	100.74	86.0267	1.45	0.429811
138	846	D	10	2	65.9	89.46	100.76	86.0447	1.347	-1.14918
138	846	D	10	2	68	89.48	100.78	86.0628	1.384	-0.582738
138	846	D	10	2	69.8	89.5	100.8	86.0808	1.393	-0.445382
138	846	D	10	2	72	89.52	100.82	86.0989	1.369	-0.813735
138	846	D	10	2	73.5	89.53	100.83	86.108	1.385	-0.568826
138	846	D	10	2	75.9	89.56	100.86	86.1359	1.384	-0.584998
138	846	D	10	2	78	89.58	100.88	86.1546	1.373	-0.754133
138	846	D	10	2	79.6	89.6	100.9	86.1732	1.372	-0.770022
138	846	D	10	2	81.8	89.62	100.92	86.1919	1.425	0.0416119
138	846	D	10	2	83.3	89.63	100.93	86.2012	1.409	-0.203863
138	846	D	10	2	85.8	89.66	100.96	86.2292	1.378	-0.679771
138	846	D	10	2	88	89.68	100.98	86.2478	1.388	-0.52709
138	846	D	10	2	89.4	89.69	100.99	86.2571	1.379	-0.665294
138	846	D	10	2	91.9	89.72	101.02	86.2851	1.292	-1.99937
138	846	D	10	2	93	89.73	101.03	86.2944	1.378	-0.681748
138	846	D	10	2	95.6	89.76	101.06	86.3224	1.329	-1.4335
138	846	D	10	2	98	89.78	101.08	86.341	1.353	-1.06627
138	846	D	10	2	99.3	89.79	101.09	86.3503	1.385	-0.576172
138	846	D	10	2	101.5	89.81	101.11	86.369	1.342	-1.23569
138	846	D	10	2	103	89.83	101.13	86.3876	1.369	-0.822494
138	846	D	10	2	105.4	89.85	101.15	86.4063	1.399	-0.363324
138	846	D	10	2	108	89.88	101.18	86.4342	1.361	-0.946503
138	846	D	10	2	108.9	89.89	101.19	86.4436	1.328	-1.45249
138	846	D	10	2	111.4	89.91	101.21	86.4622	1.438	0.232637
138	846	D	10	2	113.7	89.94	101.24	86.4902	1.388	-0.534437
138	846	D	10	2	116.2	89.96	101.26	86.5088	1.423	0.00135624
138	846	D	10	2	118.3	89.98	101.28	86.5275	1.416	-0.10648
138	846	D	10	2	120.8	90.01	101.31	86.5554	1.457	0.520977
138	846	D	10	2	123	90.03	101.33	86.5741	1.404	-0.291787
138	846	D	10	2	125.5	90.06	101.36	86.602	1.351	-1.10483
138	846	D	10	2	127.7	90.08	101.38	86.6207	1.376	-0.722287
138	846	D	10	2	130.2	90.1	101.4	86.6393	1.414	-0.14052
138	846	D	10	2	132.3	90.12	101.42	86.658	1.456	0.502544
138	846	D	10	2	134.8	90.15	101.45	86.6859	1.32	-1.58244
138	846	D	10	2	137	90.17	101.47	86.7046	1.378	-0.69418
138	846	D	10	2	139.5	90.19	101.49	86.7232	1.425	0.0255067
138	846	D	10	2	141.7	90.22	101.52	86.7512	1.41	-0.205209
138	846	D	10	2	144.2	90.24	101.54	86.7698	1.357	-1.01797
138	846	D	10	2	146.3	90.26	101.56	86.7885	1.383	-0.620101
138	846	D	10	3	3	90.33	101.63	86.8537	1.465	0.634532
138	846	D	10	3	4.8	90.35	101.65	86.8724	1.385	-0.591995
138	846	D	10	3	7	90.37	101.67	86.891	1.393	-0.469964
138	846	D	10	3	8.5	90.38	101.68	86.9003	1.377	-0.715439
138	846	D	10	3	10.9	90.41	101.71	86.9283	1.412	-0.179928
138	846	D	10	3	13	90.43	101.73	86.947	1.421	-0.0425726
138	846	D	10	3	14.5	90.44	101.74	86.9563	1.435	0.171688
138	846	D	10	3	17	90.47	101.77	86.9842	1.417	-0.105001
138	846	D	10	3	18	90.48	101.78	86.9936	1.407	-0.258529
138	846	D	10	3	18.5	90.49	101.79	87.0029	1.408	-0.243487
138	846	D	10	3	20.7	90.51	101.81	87.0215	1.422	-0.0295085
138	846	D	10	3	23	90.53	101.83	87.0402	1.459	0.536934
138	846	D	10	3	24.6	90.55	101.85	87.0588	1.484	0.919481
138	846	D	10	3	26.8	90.57	101.87	87.0775	1.436	0.183339
138	846	D	10	3	28.1	90.58	101.88	87.0868	1.416	-0.123433
138	846	D	10	3	30.4	90.6	101.9	87.1054	1.444	0.305088
138	846	D	10	3	33	90.63	101.93	87.1334	1.435	0.16632
138	846	D	10	3	34.2	90.64	101.94	87.1427	1.42	-0.0638306
138	846	D	10	3	36.6	90.67	101.97	87.1707	1.426	0.0272688
138	846	D	10	3	38	90.68	101.98	87.18	1.456	0.486722
138	846	D	10	3	40.4	90.7	102	87.1986	1.431	0.103044
138	846	C	10	1	36.6	88.37	102.02	87.2354	1.413	-0.203115
138	846	C	10	1	38.1	88.38	102.03	87.2438	1.4148	-0.173671
138	846	C	10	1	40.3	88.4	102.05	87.2624	1.416	-0.155292
138	846	C	10	1	42.8	88.43	102.08	87.289	1.352	-1.19339
138	846	C	10	1	45	88.45	102.1	87.3071	1.401	-0.399738
138	846	C	10	1	47.3	88.47	102.12	87.3248	1.424	-0.0274998
138	846	C	10	1	49.8	88.5	102.15	87.3501	1.456	0.490349
138	846	C	10	1	52	88.52	102.17	87.3675	1.426	0.0035817
138	846	C	10	1	53.5	88.53	102.18	87.3754	1.407	-0.304628
138	846	C	10	1	55.9	88.56	102.21	87.4016	1.421	-0.0785246
138	846	C	10	1	58.1	88.58	102.23	87.4182	1.441	0.245093
138	846	C	10	1	60.6	88.61	102.26	87.4444	1.395	-0.501264
138	846	C	10	1	62.8	88.63	102.28	87.461	1.439	0.211351
138	846	C	10	1	65.3	88.65	102.3	87.4784	1.456	0.486349
138	846	C	10	1	68	88.68	102.33	87.5046	1.4757	0.804297
138	846	C	10	1	68.9	88.69	102.34	87.5125	1.524	1.58744
138	846	C	10	1	71.4	88.71	102.36	87.5299	1.474	0.776486
138	846	C	10	1	73.6	88.74	102.39	87.5552	1.495	1.11604
138	846	C	10	1	76	88.76	102.41	87.5727	1.496	1.13172
138	846	C	10	1	78.2	88.78	102.43	87.5902	1.467	0.661154
138	846	C	10	1	80.7	88.81	102.46	87.6155	1.482	0.903481
138	846	C	10	1	83	88.83	102.48	87.6329	1.4677	0.670636
138	846	C	10	1	86.7	88.87	102.52	87.667	1.486	0.966704
138	846	C	10	1	89.2	88.89	102.54	87.6836	1.475	0.787887
138	846	C	10	1	91.4	88.91	102.56	87.701	1.467	0.65769
138	846	C	10	1	93.8	88.94	102.59	87.7263	1.478	0.835174
138	846	C	10	1	96	88.96	102.61	87.7438	1.46	0.542906
138	846	C	10	1	98	88.98	102.63	87.7613	1.4662	0.642314
138	846	C	10	1	100	89	102.65	87.7779	1.447	0.331131
138	846	C	10	1	102.2	89.02	102.67	87.7953	1.424	-0.0421792
138	846	C	10	1	104.6	89.05	102.7	87.8215	1.476	0.799824
138	846	C	10	1	106.8	89.07	102.72	87.839	1.382	-0.72424
138	846	C	10	1	109.3	89.09	102.74	87.8564	1.386	-0.659945
138	846	C	10	1	111.5	89.11	102.76	87.8739	1.327	-1.61672
138	846	C	10	1	114	89.14	102.79	87.9016	1.379	-0.774729
138	846	C	10	1	116.2	89.16	102.81	87.9203	1.336	-1.47218
138	846	C	10	1	118.6	89.19	102.84	87.9492	1.37	-0.921935
138	846	C	10	1	120.8	89.21	102.86	87.9678	1.373	-0.87385
138	846	C	10	1	123.3	89.23	102.88	87.9865	1.366	-0.987837
138	846	C	10	1	125.5	89.25	102.9	88.0051	1.318	-1.76637
138	846	C	10	1	127.8	89.28	102.93	88.034	1.307	-1.94542
138	846	C	10	1	130.3	89.3	102.95	88.0527	1.446	0.306921
138	846	C	10	1	132.5	89.32	102.97	88.0713	1.339	-1.42782
138	846	C	10	1	135	89.35	103	88.1002	1.345	-1.33138
138	846	C	10	1	137.2	89.37	103.02	88.1189	1.372	-0.894323
138	846	C	10	1	139.7	89.4	103.05	88.1468	1.272	-2.51585
138	846	C	10	1	141.9	89.42	103.07	88.1664	1.351	-1.23602
138	846	C	10	1	144.4	89.44	103.09	88.185	1.374	-0.863783
138	846	C	10	2	2.8	89.53	103.18	88.2699	1.387	-0.655484
138	846	C	10	2	5.6	89.56	103.21	88.2978	1.29	-2.22839
138	846	C	10	2	8	89.58	103.23	88.3174	1.3272	-1.62656
138	846	C	10	2	9.4	89.59	103.24	88.3267	1.33	-1.58096
138	846	C	10	2	11.8	89.62	103.27	88.3547	1.36	-1.09549
138	846	C	10	2	14	89.64	103.29	88.3743	1.301	-2.05233
138	846	C	10	2	16.5	89.67	103.32	88.4022	1.282	-2.36097
138	846	C	10	2	18.7	89.69	103.34	88.4209	1.292	-2.19949
138	846	C	10	2	21.2	89.71	103.36	88.4405	1.308	-1.94069
138	846	C	10	2	23	89.73	103.38	88.46	1.3332	-1.53336
138	846	C	10	2	24.8	89.75	103.4	88.4787	1.336	-1.488
138	846	C	10	2	27.3	89.77	103.42	88.4979	1.363	-1.05087
138	846	C	10	2	29.5	89.79	103.44	88.5149	1.351	-1.2459
138	846	C	10	2	32	89.82	103.47	88.5403	1.371	-0.922545
138	846	C	10	2	34.2	89.84	103.49	88.5576	1.354	-1.19861
138	846	C	10	2	36.7	89.87	103.52	88.583	1.358	-1.13458
138	846	C	10	2	38.2	89.88	103.53	88.5912	1.372	-0.907942
138	846	C	10	2	40.3	89.9	103.55	88.6084	1.368	-0.973308
138	846	C	10	2	42.8	89.93	103.58	88.633	1.41	-0.293377
138	846	C	10	2	45	89.95	103.6	88.6502	1.35	-1.26634
138	846	C	10	2	47.5	89.97	103.62	88.6674	1.398	-0.488941
138	846	C	10	2	49.7	90	103.65	88.6929	1.407	-0.343866
138	846	C	10	2	52	90.02	103.67	88.7087	1.387	-0.668555
138	846	C	10	2	53.5	90.03	103.68	88.7166	1.4098	-0.298747
138	846	C	10	2	55.8	90.06	103.71	88.7411	1.513	1.3725
138	846	C	10	2	58.1	90.08	103.73	88.7576	1.432	0.0591887
138	846	C	10	2	60.5	90.1	103.75	88.7734	1.543	1.8577
138	846	C	10	2	62.8	90.13	103.78	88.7987	1.464	0.576499
138	846	C	10	2	65.1	90.15	103.8	88.8161	1.449	0.332851
138	846	C	10	2	67.5	90.17	103.82	88.8331	1.515	1.40203
138	846	C	10	2	68	90.18	103.83	88.8406	1.4878	0.96091
138	846	C	10	2	68.9	90.19	103.84	88.8489	1.375	-0.867583
138	846	C	10	2	71.2	90.21	103.86	88.8654	1.46	0.509537
138	846	C	10	2	73.6	90.24	103.89	88.8895	1.388	-0.658226
138	846	C	10	2	75.9	90.26	103.91	88.906	1.42	-0.140103
138	846	C	10	2	78.2	90.28	103.93	88.9217	1.457	0.459048
138	846	C	10	2	80.6	90.31	103.96	88.9449	1.512	1.3497
138	846	C	10	2	83	90.33	103.98	88.9596	1.4678	0.633293
138	846	C	10	2	84.3	90.34	103.99	88.9673	1.46	0.506061
138	846	C	10	2	86.7	90.37	104.02	88.9898	1.461	0.521474
138	846	C	10	2	89	90.39	104.04	89.0052	1.477	0.780261
138	846	C	10	2	91.3	90.41	104.06	89.02	1.446	0.277291
138	846	C	10	2	93.7	90.44	104.09	89.0431	1.42	-0.144913
138	846	C	10	2	96	90.46	104.11	89.0574	1.395	-0.550644
138	846	C	10	2	98	90.48	104.13	89.0713	1.4365	0.121448
138	846	C	10	2	99.8	90.5	104.15	89.0852	1.471	0.680081
138	846	C	10	2	102.1	90.52	104.17	89.0984	1.521	1.48987
138	846	C	10	2	104.5	90.54	104.19	89.1123	1.551	1.97557
138	846	C	10	2	106.8	90.57	104.22	89.1325	1.513	1.35892
138	846	C	10	2	109.1	90.59	104.24	89.1464	1.5	1.1477
138	846	C	10	2	111.5	90.61	104.26	89.1597	1.484	0.887843
138	846	C	10	2	113.8	90.64	104.29	89.1805	1.557	2.07027
138	846	C	10	2	116.2	90.66	104.31	89.1938	1.503	1.19445
138	846	C	10	2	118.5	90.68	104.33	89.2077	1.508	1.27493
138	846	C	10	2	120.8	90.71	104.36	89.2279	1.465	0.577234
138	846	C	10	2	123.2	90.73	104.38	89.2418	1.562	2.1489
138	846	C	10	2	125.5	90.75	104.4	89.255	1.49	0.981358
138	846	C	10	2	127.8	90.78	104.43	89.2746	1.492	1.01297
138	846	C	10	2	130.2	90.8	104.45	89.2879	1.482	0.850363
138	846	C	10	2	132.5	90.82	104.47	89.3005	1.522	1.4981
138	846	C	10	2	134.8	90.85	104.5	89.3201	1.464	0.557285
138	846	C	10	2	137.2	90.87	104.52	89.3333	1.482	0.848494
138	846	C	10	2	139.5	90.89	104.54	89.346	1.498	1.10728
138	846	C	10	2	141.9	90.92	104.57	89.3655	1.41	-0.319805
138	846	C	10	2	144.2	90.94	104.59	89.3788	1.46	0.49005
138	846	C	10	3	2.7	91.03	104.68	89.4369	1.551	1.96262
138	846	C	10	3	5.5	91.06	104.71	89.4565	1.457	0.438227
138	846	C	10	3	8	91.08	104.73	89.4697	1.4522	0.359354
138	846	C	10	3	9.4	91.09	104.74	89.476	1.425	-0.0812234
138	846	C	10	3	11.6	91.12	104.77	89.4956	1.467	0.598703
138	846	C	10	3	14.1	91.14	104.79	89.5089	1.415	-0.244632
138	846	C	10	3	16.3	91.16	104.81	89.5215	1.457	0.435561
138	846	C	10	3	18.8	91.19	104.84	89.5411	1.416	-0.229767
138	846	C	10	3	20.9	91.21	104.86	89.5537	1.418	-0.197881
138	846	C	10	3	23	91.23	104.88	89.5663	1.4367	0.10413
138	846	C	10	3	24.9	91.25	104.9	89.5796	1.465	0.562817
138	846	C	10	3	27.1	91.27	104.92	89.5922	1.393	-0.604671
138	846	C	10	3	29.6	91.3	104.95	89.6112	1.435	0.0752488
138	846	C	10	3	31.8	91.32	104.97	89.6244	1.432	0.0260918
138	846	C	10	3	34.1	91.34	104.99	89.6371	1.391	-0.638962
138	846	C	10	3	36.6	91.37	105.02	89.656	1.482	0.835149
138	846	C	10	3	38.1	91.38	105.03	89.6623	1.4518	0.345947
138	846	C	10	3	40.2	91.4	105.05	89.6756	1.443	0.202242
138	846	C	10	3	42.7	91.43	105.08	89.6945	1.447	0.266276
138	846	C	10	3	44.9	91.45	105.1	89.7072	1.474	0.703344
138	846	C	10	3	47.3	91.47	105.12	89.7204	1.405	-0.415525
138	846	C	10	3	49.6	91.5	105.15	89.7394	1.449	0.296816
138	846	C	10	3	52	91.52	105.17	89.752	1.52	1.44701
138	846	C	10	3	53.2	91.53	105.18	89.7583	1.492	0.992946
138	846	C	10	3	55.5	91.56	105.21	89.7779	1.452	0.343841
138	846	C	10	3	57.9	91.58	105.23	89.7905	1.494	1.02403
138	846	C	10	3	60.1	91.6	105.25	89.8032	1.523	1.49349
138	846	C	10	3	62.6	91.63	105.28	89.8227	1.563	2.14105
138	846	C	10	3	64.9	91.65	105.3	89.8354	1.496	1.05457
138	846	C	10	3	67.1	91.67	105.32	89.848	1.582	2.44794
138	846	C	10	3	68	91.68	105.33	89.8543	1.5194	1.43305
138	846	C	10	3	68.7	91.69	105.34	89.8613	1.471	0.64832
138	846	C	10	3	71.1	91.71	105.36	89.8739	1.56	2.09033
138	846	C	10	3	73.3	91.73	105.38	89.8865	1.518	1.40901
138	846	C	10	3	75.8	91.76	105.41	89.9061	1.48	0.792323
138	846	C	10	3	78	91.78	105.43	89.9187	1.505	1.19698
138	846	C	10	3	80.4	91.8	105.45	89.9313	1.508	1.24507
138	846	C	10	3	83	91.83	105.48	89.9503	1.5042	1.18214
138	846	C	10	3	84.1	91.84	105.49	89.9572	1.438	0.109458
138	846	C	10	3	86.5	91.86	105.51	89.9699	1.433	0.0278861
138	846	C	10	3	88.7	91.89	105.54	89.9895	1.419	-0.199825
138	846	C	10	3	91.2	91.91	105.56	90.0037	1.483	0.836943
138	846	C	10	3	93.4	91.93	105.58	90.0172	1.475	0.706746
138	846	C	10	3	95.9	91.96	105.61	90.0376	1.441	0.154881
138	846	C	10	3	98	91.98	105.63	90.0521	1.4448	0.216472
138	846	C	10	3	99.5	91.99	105.64	90.06	1.4	-0.510435
138	846	C	10	3	101.9	92.02	105.67	90.0817	1.419	-0.203289
138	846	C	10	3	104.4	92.04	105.69	90.0961	1.405	-0.430739
138	846	C	10	3	106.6	92.07	105.72	90.1191	1.429	-0.0425505
138	846	C	10	3	109.1	92.09	105.74	90.1349	1.438	0.102786
138	846	C	10	3	111.2	92.11	105.76	90.1507	1.437	0.0860443
138	846	C	10	3	113.7	92.14	105.79	90.1752	1.447	0.247324
138	846	C	10	3	115.9	92.16	105.81	90.191	1.465	0.538532
138	846	C	10	3	120.6	92.21	105.86	90.2304	1.455	0.375116
138	846	C	10	3	123	92.23	105.88	90.2471	1.476	0.714945
138	846	C	10	3	125.2	92.25	105.9	90.2633	1.419	-0.209432
138	846	C	10	3	127.7	92.28	105.93	90.2877	1.402	-0.485763
138	846	C	10	3	129.9	92.3	105.95	90.3047	1.378	-0.875283
138	846	C	10	3	132.4	92.32	105.97	90.321	1.484	0.842201
138	846	C	10	3	134.6	92.35	106	90.3453	1.417	-0.24452
138	846	C	10	3	137.1	92.37	106.02	90.3624	1.447	0.241181
138	846	C	10	3	139.2	92.39	106.04	90.3786	1.449	0.273067
138	846	C	10	3	141.8	92.42	106.07	90.403	1.424	-0.132926
138	846	C	10	3	143.9	92.44	106.09	90.4207	1.41	-0.360376
138	846	C	10	3	146.4	92.46	106.11	90.4395	1.424	-0.133998
138	846	C	10	4	2.8	92.53	106.18	90.5116	1.446	0.220709
138	846	C	10	4	5.5	92.56	106.21	90.542	1.384	-0.784984
138	846	C	10	4	8	92.58	106.23	90.5623	1.4143	-0.293875
138	846	C	10	4	9.5	92.6	106.25	90.5836	1.413	-0.316017
138	846	C	10	4	11.7	92.62	106.27	90.604	1.415	-0.284144
138	846	C	10	4	14.2	92.64	106.29	90.6266	1.325	-1.74331
138	846	C	10	4	16.3	92.66	106.31	90.6491	1.364	-1.1118
138	846	C	10	4	18.8	92.69	106.34	90.6841	1.426	-0.107723
138	846	C	10	4	21	92.71	106.36	90.708	1.414	-0.302747
138	846	C	10	4	23	92.73	106.38	90.7337	1.3757	-0.924576
138	846	C	10	4	25	92.75	106.4	90.7608	1.302	-2.11912
138	846	C	10	4	27.2	92.77	106.42	90.7866	1.334	-1.60102
138	846	C	10	4	29.6	92.8	106.45	90.8252	1.444	0.181085
138	846	C	10	4	31.8	92.82	106.47	90.8523	1.382	-0.824333
138	846	C	10	4	34.3	92.84	106.49	90.8781	1.364	-1.1166
138	846	C	10	4	36.5	92.86	106.51	90.9038	1.355	-1.26297
138	846	C	10	4	38	92.88	106.53	90.9296	1.3647	-1.10687
138	846	C	10	4	40.4	92.9	106.55	90.9567	1.36	-1.18304
138	846	C	10	4	42.6	92.93	106.58	90.9953	1.382	-0.827274
138	846	C	10	4	45.1	92.95	106.6	91.0211	1.331	-1.65435
138	846	C	10	4	47.3	92.97	106.62	91.0482	1.404	-0.47177
138	846	C	10	4	49.7	93	106.65	91.0868	1.397	-0.586018
138	846	C	10	4	51.9	93.02	106.67	91.1126	1.42	-0.213781
138	846	C	10	4	53.4	93.03	106.68	91.1255	1.4001	-0.535878
138	846	C	10	4	58.1	93.08	106.73	91.1912	1.41	-0.377459
138	846	C	10	4	60.4	93.1	106.75	91.217	1.436	0.0434115
138	846	C	10	4	62.7	93.13	106.78	91.2557	1.35	-1.35132
138	846	C	10	4	65.1	93.15	106.8	91.2802	1.412	-0.346906
138	846	C	10	4	67.4	93.17	106.82	91.3059	1.487	0.868144
138	846	C	10	4	68	93.18	106.83	91.3188	1.431	-0.0397632
138	846	C	10	4	69	93.19	106.84	91.3317	1.404	-0.477639
138	846	C	10	4	71.2	93.21	106.86	91.3562	1.377	-0.915779
138	846	C	10	4	73.5	93.24	106.89	91.3949	1.383	-0.819337
138	846	C	10	4	75.9	93.26	106.91	91.4193	1.427	-0.10673
138	846	C	10	4	78.2	93.28	106.93	91.4451	1.418	-0.25313
138	846	C	10	4	80.5	93.31	106.96	91.4789	1.402	-0.513263
138	846	C	10	4	83	93.33	106.98	91.5014	1.3813	-0.848756
138	846	C	10	4	84.3	93.34	106.99	91.5127	1.397	-0.595102
138	846	C	10	4	86.6	93.37	107.02	91.5454	1.352	-1.32527
138	846	C	10	4	89	93.39	107.04	91.5671	1.344	-1.45548
138	846	C	10	4	91.3	93.41	107.06	91.5877	1.383	-0.823872
138	846	C	10	4	93.6	93.44	107.09	91.6202	1.321	-1.82954
138	846	C	10	4	96	93.46	107.11	91.6407	1.357	-1.24665
138	846	C	10	4	98	93.48	107.13	91.6624	1.3538	-1.29848
138	846	C	10	4	99.8	93.5	107.15	91.685	1.382	-0.842488
138	846	C	10	4	102.1	93.52	107.17	91.7064	1.482	0.777757
138	846	C	10	4	104.4	93.54	107.19	91.729	1.46	0.420658
138	846	C	10	4	106.8	93.57	107.22	91.7625	1.417	-0.277079
138	846	C	10	4	109.1	93.59	107.24	91.7883	1.368	-1.07179
138	846	C	10	4	111.5	93.61	107.26	91.8128	1.337	-1.57473
138	846	C	10	4	113.8	93.64	107.29	91.8514	1.38	-0.878635
138	846	C	10	4	116.1	93.66	107.31	91.8759	1.379	-0.895382
138	846	C	10	4	118.5	93.68	107.33	91.9017	1.32	-1.85222
138	846	C	10	4	120.8	93.71	107.36	91.9391	1.34	-1.52887
138	846	C	10	4	123.1	93.73	107.38	91.9649	1.337	-1.57797
138	846	C	10	4	125.5	93.75	107.4	91.9906	1.348	-1.40016
138	846	C	10	4	127.8	93.78	107.43	92.028	1.356	-1.27132
138	846	C	10	4	130.1	93.8	107.45	92.0538	1.351	-1.35293
138	846	C	10	4	132.5	93.82	107.47	92.0783	1.376	-0.948276
138	846	C	10	4	134.8	93.85	107.5	92.1169	1.349	-1.3867
138	846	C	10	4	137.2	93.87	107.52	92.1414	1.368	-1.07927
138	846	C	10	4	139.5	93.89	107.54	92.1672	1.356	-1.27431
138	846	C	10	4	141.8	93.92	107.57	92.2045	1.411	-0.383664
138	846	C	10	4	144.2	93.94	107.59	92.2303	1.414	-0.33558
138	846	C	10	5	2.8	94.03	107.68	92.3437	1.43	-0.0786591
138	846	C	10	5	5.6	94.06	107.71	92.3824	1.415	-0.322571
138	846	C	10	5	8	94.08	107.73	92.4069	1.4433	0.136116
138	846	C	10	5	9.4	94.09	107.74	92.4198	1.462	0.438389
138	846	C	10	5	11.8	94.12	107.77	92.4571	1.413	-0.356588
138	846	C	10	5	14	94.14	107.79	92.4829	1.411	-0.389545
138	846	C	10	5	16.5	94.17	107.82	92.5209	1.435	-0.00135667
138	846	C	10	5	18.7	94.19	107.84	92.5438	1.488	0.857116
138	846	C	10	5	21.1	94.21	107.86	92.5678	1.463	0.451398
138	846	C	10	5	23	94.23	107.88	92.5905	1.4498	0.237455
138	846	C	10	5	24.8	94.25	107.9	92.613	1.418	-0.279023
138	846	C	10	5	27.1	94.27	107.92	92.6356	1.447	0.190468
138	846	C	10	5	29.5	94.29	107.94	92.657	1.511	1.22724
138	846	C	10	5	31.8	94.32	107.97	92.6905	1.486	0.821231
138	846	C	10	5	34.1	94.34	107.99	92.7111	1.478	0.691034
138	846	C	10	5	36.5	94.36	108.01	92.7327	1.43	-0.0874673
138	846	C	10	5	38.1	94.38	108.03	92.7533	1.465	0.479271
138	846	C	10	5	40.3	94.4	108.05	92.7749	1.515	1.28914
138	846	C	10	5	42.6	94.43	108.08	92.806	1.461	0.413107
138	846	C	10	5	45	94.45	108.1	92.8271	1.484	0.785345
138	846	C	10	5	47.3	94.47	108.12	92.8481	1.451	0.249965
138	846	C	10	5	49.6	94.5	108.15	92.8786	1.464	0.459858
138	846	C	10	5	51.9	94.52	108.17	92.8997	1.529	1.5128
138	846	C	10	5	53.5	94.53	108.18	92.9102	1.4637	0.453653
138	846	C	10	5	55.8	94.56	108.21	92.9403	1.493	0.928289
138	846	C	10	5	58.1	94.58	108.23	92.9606	1.509	1.18708
138	846	C	10	5	60.5	94.6	108.25	92.9798	1.503	1.08929
138	846	C	10	5	62.8	94.63	108.28	93.0103	1.508	1.16953
138	846	C	10	5	65.1	94.65	108.3	93.0296	1.537	1.63902
138	846	C	10	5	67.4	94.67	108.32	93.0499	1.529	1.50881
138	846	C	10	5	68	94.68	108.33	93.06	1.5028	1.08392
138	846	C	10	5	68.9	94.69	108.34	93.0691	1.496	0.973433
138	846	C	10	5	71.2	94.71	108.36	93.0884	1.452	0.259759
138	846	C	10	5	73.5	94.74	108.39	93.1154	1.472	0.583115
138	846	C	10	5	75.9	94.76	108.41	93.1333	1.521	1.37673
138	846	C	10	5	78.2	94.78	108.43	93.1512	1.522	1.39243
138	846	C	10	5	80.5	94.81	108.46	93.177	1.498	1.00265
138	846	C	10	5	83	94.83	108.48	93.1948	1.5065	1.13988
138	846	C	10	5	84.3	94.84	108.49	93.2038	1.402	-0.554095
138	846	C	10	5	86.6	94.87	108.52	93.2305	1.432	-0.0686648
138	846	C	10	5	89	94.89	108.54	93.2474	1.488	0.838438
138	846	C	10	5	91.3	94.91	108.56	93.2653	1.466	0.481327
138	846	C	10	5	93.6	94.94	108.59	93.2921	1.523	1.4044
138	846	C	10	5	96	94.96	108.61	93.3095	1.509	1.17693
138	846	C	10	5	98	94.98	108.63	93.3248	1.504	1.09536
138	846	C	10	5	99.8	95	108.65	93.3396	1.522	1.38658
138	846	C	10	5	102.2	95.02	108.67	93.3544	1.494	0.932214
138	846	C	10	5	104.5	95.04	108.69	93.3691	1.537	1.62856
138	846	C	10	5	106.8	95.07	108.72	93.3904	1.538	1.64401
138	846	C	10	5	109.2	95.09	108.74	93.4052	1.483	0.752064
138	846	C	10	5	111.5	95.11	108.76	93.42	1.481	0.719106
138	846	C	10	5	113.8	95.14	108.79	93.4421	1.529	1.49623
138	846	C	10	5	116.2	95.16	108.81	93.4561	1.525	1.43094
138	846	C	10	5	118.5	95.18	108.83	93.4708	1.453	0.263422
138	846	C	10	5	120.8	95.21	108.86	93.493	1.496	0.959552
138	846	C	10	5	123.2	95.23	108.88	93.5077	1.491	0.877987
138	846	C	10	5	125.5	95.25	108.9	93.5215	1.478	0.666748
138	846	C	10	5	127.8	95.28	108.93	93.5431	1.43	-0.112023
138	846	C	10	5	130.2	95.3	108.95	93.5576	1.451	0.227811
138	846	C	10	5	132.5	95.32	108.97	93.572	1.402	-0.566904
138	846	C	10	5	134.9	95.35	109	93.5929	1.411	-0.421842
138	846	C	10	5	137.2	95.37	109.02	93.6073	1.428	-0.146844
138	846	C	10	5	139.5	95.39	109.04	93.6217	1.472	0.565771
138	846	C	10	5	141.9	95.42	109.07	93.6434	1.494	0.921536
138	846	C	10	5	144.2	95.44	109.09	93.657	1.472	0.564437
138	846	C	10	6	2.8	95.53	109.18	93.7212	1.466	0.46478
138	846	C	10	6	5.5	95.56	109.21	93.7428	1.447	0.15604
138	846	C	10	6	8	95.58	109.23	93.7572	1.461	0.382405
138	846	C	10	6	9.5	95.6	109.25	93.7717	1.459	0.34946
138	846	C	10	6	11.7	95.62	109.27	93.7853	1.453	0.251685
138	846	C	10	6	14.2	95.64	109.29	93.7997	1.462	0.397021
138	846	C	10	6	16.4	95.66	109.31	93.8142	1.476	0.623387
138	846	C	10	6	18.8	95.69	109.34	93.8358	1.51	1.17366
138	846	C	10	6	21	95.71	109.36	93.8495	1.515	1.25413
138	846	C	10	6	23	95.73	109.38	93.8639	1.5048	1.08884
138	846	C	10	6	25	95.75	109.4	93.8783	1.568	2.11214
138	846	C	10	6	27.2	95.77	109.42	93.8928	1.513	1.22015
138	846	C	10	6	29.6	95.8	109.45	93.9136	1.49	0.846562
138	846	C	10	6	31.8	95.82	109.47	93.928	1.454	0.26255
138	846	C	10	6	34.3	95.84	109.49	93.9425	1.494	0.910322
138	846	C	10	6	36.5	95.86	109.51	93.9569	1.497	0.958418
138	846	C	10	6	38.1	95.88	109.53	93.9714	1.5163	1.2712
138	846	C	10	6	40.5	95.9	109.55	93.9852	1.492	0.876305
138	846	C	10	6	42.7	95.93	109.58	94.0079	1.445	0.113743
138	846	C	10	6	45.1	95.95	109.6	94.0234	1.498	0.972224
138	846	C	10	6	47.3	95.97	109.62	94.0388	1.523	1.37686
138	846	C	10	6	49.8	96	109.65	94.0615	1.471	0.533274
138	846	C	10	6	52	96.02	109.67	94.0769	1.513	1.21347
138	846	C	10	6	53.4	96.03	109.68	94.0851	1.5077	1.12676
138	846	C	10	6	55.9	96.06	109.71	94.1078	1.538	1.61759
138	846	C	10	6	58.1	96.08	109.73	94.1232	1.535	1.5685
138	846	C	10	6	60.6	96.11	109.76	94.146	1.514	1.22727
138	846	C	10	6	62.8	96.13	109.78	94.1616	1.475	0.594641
138	846	C	10	6	65.2	96.15	109.8	94.1772	1.498	0.966879
138	846	C	10	6	67.4	96.17	109.82	94.1928	1.517	1.27431
138	846	C	10	6	68	96.18	109.83	94.201	1.5056	1.08926
138	846	C	10	6	68.9	96.19	109.84	94.2084	1.525	1.4034
138	846	C	10	6	71.3	96.21	109.86	94.2239	1.454	0.252133
138	846	C	10	6	73.5	96.24	109.89	94.2477	1.451	0.202716
138	846	C	10	6	75.9	96.26	109.91	94.2633	1.512	1.19085
138	846	C	10	6	78.4	96.28	109.93	94.2789	1.546	1.74145
138	846	C	10	6	80.6	96.31	109.96	94.3019	1.539	1.62719
138	846	C	10	6	83	96.33	109.98	94.3174	1.5462	1.74269
138	846	C	10	6	84.5	96.35	110	94.3337	1.542	1.67466
138	846	C	10	6	86.7	96.37	110.02	94.3508	1.522	1.34994
138	846	C	10	6	89.1	96.39	110.04	94.368	1.571	2.14366
138	846	C	10	6	91.3	96.41	110.06	94.3851	1.524	1.38134
138	846	C	10	6	93.8	96.44	110.09	94.4113	1.572	2.15849
138	846	C	10	6	96	96.46	110.11	94.4284	1.546	1.73659
138	846	C	10	6	98	96.48	110.13	94.4456	1.5563	1.90355
138	846	C	10	6	99.9	96.5	110.15	94.4627	1.61	2.77278
138	846	C	10	6	102.1	96.52	110.17	94.4798	1.523	1.36216
138	846	C	10	6	106.8	96.57	110.22	94.5222	1.564	2.02542
138	846	C	10	6	109.3	96.59	110.24	94.5394	1.517	1.2631
138	846	C	10	6	111.5	96.61	110.26	94.5574	1.524	1.37599
138	846	C	10	6	113.8	96.64	110.29	94.5845	1.567	2.07214
138	846	C	10	6	116.3	96.66	110.31	94.6034	1.543	1.68263
138	846	C	10	6	118.5	96.68	110.33	94.6215	1.56	1.95763
138	846	C	10	6	121	96.71	110.36	94.6485	1.547	1.74606
138	846	C	10	6	123.2	96.73	110.38	94.6675	1.502	1.01623
138	846	C	10	6	125.6	96.76	110.41	94.6945	1.519	1.29101
138	846	C	10	6	127.8	96.78	110.43	94.7126	1.523	1.3553
138	846	C	10	6	130.3	96.8	110.45	94.7315	1.4755	0.58486
138	846	C	10	6	134.8	96.85	110.5	94.7766	1.479	0.640246
138	846	C	10	6	137.2	96.87	110.52	94.7947	1.457	0.283147
138	846	C	10	6	139.5	96.89	110.54	94.8136	1.5	0.979551
138	846	C	10	6	141.8	96.92	110.57	94.8407	1.458	0.298024
138	846	C	10	6	144.2	96.94	110.59	94.8587	1.507	1.09167
138	846	C	10	7	2.7	97.03	110.68	94.9408	1.484	0.71649
138	846	C	10	7	5.4	97.05	110.7	94.9572	1.44	0.00280991
138	846	C	10	7	8	97.08	110.73	94.9818	1.4135	-0.427499
138	846	C	10	7	9.4	97.09	110.74	94.99	1.379	-0.986927
138	846	C	10	7	11.6	97.12	110.77	95.0154	1.484	0.714085
138	846	C	10	7	14.1	97.14	110.79	95.0318	1.44	0.00040765
138	846	C	10	7	16.3	97.16	110.81	95.0482	1.361	-1.28054
138	846	C	10	7	18.8	97.19	110.84	95.0736	1.3985	-0.673552
138	846	C	10	7	23	97.23	110.88	95.1064	1.4185	-0.350457
138	846	C	10	7	24.7	97.25	110.9	95.1236	1.437	-0.0511519
138	846	C	10	7	27.1	97.27	110.92	95.1398	1.394	-0.748625
138	846	C	10	7	29.5	97.29	110.94	95.1569	1.386	-0.87881
138	846	C	10	7	31.7	97.32	110.97	95.1821	1.364	-1.23618
138	846	C	10	7	34.1	97.34	110.99	95.1983	1.311	-2.09569
138	846	C	10	7	36.4	97.36	111.01	95.2153	1.393	-0.767228
138	846	C	10	7	38.7	97.39	111.04	95.2405	1.396	-0.719406
138	846	C	10	7	41.1	97.41	111.06	95.2568	1.373	-1.09271
138	846	C	10	7	43.4	97.43	111.08	95.2738	1.329	-1.80636
138	846	C	10	7	45.7	97.46	111.11	95.2989	1.408	-0.526782
138	846	C	10	7	48.1	97.48	111.13	95.3149	1.397	-0.7056
138	846	C	10	7	50.4	97.5	111.15	95.3317	1.445	0.0718371
138	846	C	10	7	52.9	97.53	111.18	95.3566	1.342	-1.5984
138	846	C	10	7	55.1	97.55	111.2	95.3726	1.444	0.0542956
138	846	C	10	7	57.5	97.57	111.22	95.3895	1.352	-1.43729
138	846	C	10	7	59.9	97.6	111.25	95.4143	1.404	-0.595351
138	846	D	11	2	38.9	98.69	111.09	95.4244	1.397	-0.674827
138	846	C	10	7	62.1	97.62	111.27	95.4304	1.415	-0.417593
138	846	D	11	2	41.3	98.71	111.11	95.4405	1.393	-0.73669
138	846	C	10	7	64.4	97.64	111.29	95.4472	1.468	0.440881
138	846	D	11	2	43	98.73	111.13	95.4565	1.39	-0.783228
138	846	C	10	7	66.8	97.67	111.32	95.4721	1.476	0.569745
138	846	D	11	2	45.1	98.75	111.15	95.4726	1.446	0.0743794
138	846	D	11	2	47.4	98.77	111.17	95.4886	1.409	-0.493193
138	846	D	11	2	49.8	98.8	111.2	95.5126	1.423	-0.279497
138	846	D	11	2	52.1	98.82	111.22	95.5287	1.463	0.332918
138	846	D	11	2	53	98.83	111.23	95.5367	1.425	-0.249696
138	846	D	11	2	53.6	98.84	111.24	95.5447	1.467	0.393651
138	846	D	11	2	55.9	98.86	111.26	95.5608	1.416	-0.388464
138	846	D	11	2	58.3	98.88	111.28	95.5768	1.56	1.8177
138	846	D	11	2	60.6	98.91	111.31	95.6009	1.519	1.18855
138	846	D	11	2	63	98.93	111.33	95.6169	1.5	0.896817
138	846	D	11	2	64.4	98.94	111.34	95.6249	1.515	1.1264
138	846	D	11	2	66.7	98.97	111.37	95.649	1.435	-0.100406
138	846	D	11	2	69	98.99	111.39	95.665	1.471	0.450711
138	846	D	11	2	71.4	99.01	111.41	95.681	1.512	1.07845
138	846	D	11	2	73	99.03	111.43	95.6971	1.503	0.939965
138	846	D	11	2	75.1	99.05	111.45	95.7131	1.49	0.740182
138	846	D	11	2	77.5	99.07	111.47	95.7292	1.487	0.693643
138	846	D	11	2	94.4	99.24	111.64	95.867	1.537	1.45507
138	846	D	11	2	96.7	99.27	111.67	95.8914	1.482	0.611369
138	846	D	11	2	99	99.29	111.69	95.9076	1.468	0.396261
138	846	D	11	2	101.4	99.31	111.71	95.9239	1.478	0.548941
138	846	D	11	2	103	99.33	111.73	95.9403	1.517	1.14603
138	846	D	11	2	105.2	99.35	111.75	95.9567	1.533	1.39066
138	846	D	11	2	107.5	99.38	111.78	95.9813	1.539	1.48176
138	846	D	11	2	109.8	99.4	111.8	95.9977	1.475	0.500425
138	846	C	11	1	2.8	97.53	111.67	96.0071	1.547	1.71117
138	846	D	11	2	112.1	99.42	111.82	96.0141	1.503	0.928946
138	846	D	11	2	114.5	99.44	111.84	96.0305	1.446	0.0548835
138	846	C	11	1	8	97.58	111.72	96.0473	1.488	0.753559
138	846	D	11	2	116.8	99.47	111.87	96.0552	1.512	1.06545
138	846	C	11	1	9.5	97.6	111.74	96.0637	1.449	0.120921
138	846	C	11	1	11.7	97.62	111.76	96.0801	1.449	0.120386
138	846	C	11	1	14.1	97.64	111.78	96.0957	1.428	-0.220509
138	846	C	11	1	16.4	97.66	111.8	96.1125	1.518	1.23765
138	846	C	11	1	18.8	97.69	111.83	96.1374	1.505	1.02615
138	846	C	11	1	21	97.71	111.85	96.1546	1.536	1.528
138	846	C	11	1	23	97.73	111.87	96.1709	1.49	0.781969
138	846	C	11	1	25	97.75	111.89	96.1881	1.491	0.797644
138	846	C	11	1	27.2	97.77	111.91	96.2053	1.5	0.94298
138	846	C	11	1	29.7	97.8	111.94	96.2302	1.484	0.68286
138	846	C	11	1	31.9	97.82	111.96	96.2474	1.492	0.811985
138	846	C	11	1	34.3	97.84	111.98	96.2637	1.541	1.60563
138	846	C	11	1	36.5	97.86	112	96.2809	1.507	1.05403
138	846	C	11	1	38	97.88	112.02	96.2972	1.512	1.13453
138	846	C	11	1	40.4	97.9	112.04	96.3144	1.53	1.4257
138	846	C	11	1	42.6	97.93	112.07	96.3402	1.496	0.873875
138	846	C	11	1	45.1	97.95	112.09	96.3565	1.49	0.7761
138	846	C	11	1	47.3	97.97	112.11	96.3737	1.468	0.418989
138	846	C	11	1	49.8	98	112.14	96.3986	1.463	0.33715
138	846	C	11	1	52	98.02	112.16	96.4158	1.443	0.0124628
138	846	C	11	1	53.5	98.03	112.17	96.4244	1.4668	0.398479
138	846	C	11	1	55.8	98.06	112.2	96.4493	1.483	0.659708
138	846	C	11	1	58.1	98.08	112.22	96.4665	1.499	0.918496
138	846	C	11	1	60.4	98.1	112.24	96.4829	1.47	0.447934
138	846	C	11	1	62.8	98.13	112.27	96.51	1.461	0.301264
138	846	C	11	1	65.1	98.15	112.29	96.5271	1.452	0.154869
138	846	C	11	1	67.4	98.17	112.31	96.5451	1.522	1.28889
138	846	C	11	1	68	98.18	112.32	96.5542	1.4916	0.795887
138	846	C	11	1	68.8	98.19	112.33	96.5623	1.501	0.947977
138	846	C	11	1	71.2	98.21	112.35	96.5803	1.497	0.88261
138	846	C	11	1	73.5	98.24	112.38	96.6065	1.566	2.00012
138	846	C	11	1	75.8	98.26	112.4	96.6245	1.44	-0.0425655
138	846	C	11	1	78.2	98.28	112.42	96.6429	1.448	0.0865627
138	846	C	11	1	80.5	98.31	112.45	96.67	1.44	-0.0439
138	846	C	11	1	83	98.33	112.47	96.6886	1.4507	0.128453
138	846	C	11	1	84.3	98.34	112.48	96.6979	1.445	0.0363379
138	846	C	11	1	86.6	98.37	112.51	96.725	1.374	-1.11522
138	846	C	11	1	88.9	98.39	112.53	96.7436	1.459	0.261915
138	846	C	11	1	91.3	98.41	112.55	96.7613	1.45	0.115508
138	846	C	11	1	93.6	98.44	112.58	96.7893	1.442	-0.0149548
138	846	C	11	1	95.9	98.46	112.6	96.807	1.407	-0.582766
138	846	C	11	1	98	98.48	112.62	96.8256	1.4508	0.127144
138	846	C	11	1	99.7	98.5	112.64	96.8434	1.474	0.502086
138	846	C	11	1	102.1	98.52	112.66	96.862	1.404	-0.632981
138	846	C	11	1	104.4	98.54	112.68	96.8806	1.438	-0.0824558
138	846	C	11	1	106.8	98.57	112.71	96.9077	1.458	0.240894
138	846	C	11	1	109.1	98.59	112.73	96.9263	1.433	-0.164824
138	846	C	11	1	111.4	98.61	112.75	96.944	1.423	-0.327443
138	846	C	11	1	113.8	98.64	112.78	96.972	1.457	0.222827
138	846	C	11	1	116.1	98.66	112.8	96.9897	1.432	-0.182904
138	846	C	11	1	118.4	98.68	112.82	97.0084	1.407	-0.588635
138	846	C	11	1	120.8	98.71	112.85	97.0354	1.499	0.901674
138	846	C	11	1	123.1	98.73	112.87	97.054	1.438	-0.0875271
138	846	C	11	1	125.4	98.75	112.89	97.0727	1.398	-0.736376
138	846	C	11	1	127.8	98.78	112.92	97.0997	1.41	-0.542682
138	846	C	11	1	130.1	98.8	112.94	97.1184	1.463	0.315793
138	846	C	11	1	132.4	98.82	112.96	97.1361	1.437	-0.106136
138	846	C	11	1	134.8	98.85	112.99	97.164	1.463	0.31446
138	846	C	11	1	137.1	98.87	113.01	97.1817	1.472	0.459796
138	846	C	11	1	139.5	98.89	113.03	97.2004	1.427	-0.270089
138	846	C	11	1	141.8	98.92	113.06	97.2271	1.483	0.636757
138	846	C	11	1	144.1	98.94	113.08	97.2452	1.449	0.0851534
138	846	C	11	2	2.8	99.03	113.17	97.3245	1.478	0.552774
138	846	C	11	2	5.6	99.06	113.2	97.3516	1.436	-0.128752
138	846	C	11	2	8	99.08	113.22	97.3678	1.4718	0.451498
138	846	C	11	2	9.3	99.09	113.23	97.3769	1.453	0.145984
138	846	C	11	2	11.8	99.12	113.26	97.4021	1.475	0.50175
138	846	C	11	2	14	99.14	113.28	97.4193	1.416	-0.455036
138	846	C	11	2	16.5	99.17	113.31	97.4454	1.447	0.0465989
138	846	C	11	2	18.7	99.19	113.33	97.4626	1.507	1.01853
138	846	C	11	2	21.1	99.21	113.35	97.4797	1.403	-0.667608
138	846	C	11	2	23	99.23	113.37	97.4968	1.4597	0.250302
138	846	C	11	2	24.2	99.24	113.38	97.505	1.469	0.401295
138	846	C	11	2	26.6	99.27	113.41	97.5311	1.484	0.643622
138	846	C	11	2	28.8	99.29	113.43	97.5483	1.505	0.983451
138	846	C	11	2	31.3	99.31	113.45	97.5654	1.472	0.448058
138	846	C	11	2	33.5	99.33	113.47	97.5826	1.539	1.53348
138	846	C	11	2	36	99.36	113.5	97.6078	1.468	0.381894
138	846	C	11	2	38	99.38	113.52	97.6245	1.52	1.22416
138	846	C	11	2	39.6	99.4	113.54	97.6408	1.444	-0.00816359
138	846	C	11	2	42.1	99.42	113.56	97.6571	1.489	0.720652
138	846	C	11	2	44.3	99.44	113.58	97.6734	1.49	0.736327
138	846	C	11	2	46.8	99.47	113.61	97.6983	1.504	0.96243
138	846	C	11	2	49	99.49	113.63	97.7147	1.545	1.62644
138	846	C	11	2	51.3	99.51	113.65	97.731	1.431	-0.221805
138	846	C	11	2	53	99.53	113.67	97.7473	1.487	0.685302
138	846	C	11	2	55.3	99.55	113.69	97.7636	1.482	0.603724
138	846	C	11	2	57.5	99.57	113.71	97.7791	1.455	0.165584
138	846	C	11	2	59.9	99.6	113.74	97.804	1.477	0.52135
138	846	C	11	2	62.1	99.62	113.76	97.8203	1.478	0.537025
138	846	C	11	2	64.6	99.65	113.79	97.8444	1.491	0.74693
138	846	C	11	2	66.8	99.67	113.81	97.8607	1.479	0.551902
138	846	C	11	2	68.3	99.68	113.82	97.8693	1.4527	0.124827
138	846	C	11	2	70.7	99.71	113.85	97.8934	1.46	0.242888
138	846	C	11	2	72.9	99.73	113.87	97.9106	1.502	0.923081
138	846	C	11	2	75.3	99.75	113.89	97.9269	1.386	-0.957558
138	846	C	11	2	77.5	99.78	113.92	97.9527	1.461	0.25723
138	846	C	11	2	80	99.8	113.94	97.969	1.436	-0.148501
138	846	C	11	2	82.2	99.82	113.96	97.9862	1.412	-0.538022
138	846	C	11	2	83	99.83	113.97	97.9947	1.4068	-0.622564
138	846	C	11	2	83.8	99.84	113.98	98.0021	1.447	0.0287159
138	846	C	11	2	86	99.86	114	98.0184	1.373	-1.17119
138	846	C	11	2	88.5	99.88	114.02	98.0349	1.379	-1.07449
138	846	C	11	2	90.7	99.91	114.05	98.0586	1.406	-0.637666
138	846	C	11	2	93.1	99.93	114.07	98.075	1.419	-0.427499
138	846	C	11	2	95.3	99.95	114.09	98.0906	1.372	-1.18981
138	846	C	11	2	98	99.98	114.12	98.1152	1.4137	-0.515282
138	846	C	11	2	99.3	99.99	114.13	98.1234	1.455	0.15437
138	846	C	11	2	101.5	100.01	114.15	98.139	1.41	-0.575514
138	846	C	11	2	104	100.04	114.18	98.1636	1.415	-0.49527
138	846	C	11	2	106.2	100.06	114.2	98.1792	1.373	-1.17654
138	846	C	11	2	108.6	100.09	114.23	98.2038	1.382	-1.03146
138	846	C	11	2	110.8	100.11	114.25	98.2194	1.408	-0.61059
138	846	C	11	2	113.3	100.13	114.27	98.2358	1.393	-0.854238
138	846	C	11	2	115.5	100.15	114.29	98.2514	1.372	-1.19514
138	846	C	11	2	118	100.18	114.32	98.276	1.436	-0.158644
138	846	C	11	2	120.2	100.2	114.34	98.2915	1.409	-0.596784
138	846	C	11	2	122.6	100.23	114.37	98.3162	1.422	-0.386891
138	846	C	11	2	124.8	100.25	114.39	98.3334	1.33	-1.87851
138	846	C	11	2	127.3	100.27	114.41	98.3498	1.399	-0.760736
138	846	C	11	2	129.5	100.29	114.43	98.3662	1.334	-1.81471
138	846	C	11	2	131.8	100.32	114.46	98.3916	1.442	-0.065136
138	846	C	11	2	134.3	100.34	114.48	98.408	1.395	-0.827436
138	846	C	11	2	136.6	100.37	114.51	98.4326	1.371	-1.21722
138	846	C	11	2	139	100.39	114.53	98.4498	1.41	-0.585657
138	846	C	11	2	141.2	100.41	114.55	98.4662	1.403	-0.699644
138	846	C	11	2	143.7	100.44	114.58	98.4908	1.403	-0.700441
138	846	C	11	2	145.9	100.46	114.6	98.5081	1.425	-0.344402
138	846	C	11	3	2.7	100.53	114.67	98.5655	1.48	0.545149
138	846	C	11	3	5.5	100.56	114.7	98.5909	1.447	0.00949733
138	846	C	11	3	8	100.58	114.72	98.6073	1.3963	-0.812234
138	846	C	11	3	9.4	100.59	114.73	98.6155	1.367	-1.28789
138	846	C	11	3	11.6	100.62	114.76	98.6409	1.431	-0.251423
138	846	C	11	3	14.1	100.64	114.78	98.6573	1.371	-1.22443
138	846	C	11	3	16.2	100.66	114.8	98.6737	1.449	0.0392436
138	846	C	11	3	18.7	100.69	114.83	98.6991	1.431	-0.253292
138	846	C	11	3	20.9	100.71	114.85	98.7155	1.39	-0.918346
138	846	C	11	3	23	100.73	114.87	98.7319	1.388	-0.951303
138	846	C	11	3	24.6	100.75	114.89	98.7483	1.433	-0.222478
138	846	C	11	3	26.8	100.77	114.91	98.7656	1.458	0.182181
138	846	C	11	3	29.3	100.79	114.93	98.782	1.411	-0.580125
138	846	C	11	3	31.5	100.81	114.95	98.7984	1.464	0.278362
138	846	C	11	3	33.9	100.84	114.98	98.8238	1.367	-1.29462
138	846	C	11	3	36.1	100.86	115	98.8402	1.423	-0.387502
138	846	C	11	3	38	100.88	115.02	98.8566	1.4227	-0.393433
138	846	C	11	3	40	100.9	115.04	98.873	1.469	0.356999
138	846	C	11	3	42.2	100.92	115.06	98.8902	1.405	-0.680841
138	846	C	11	3	44.7	100.95	115.09	98.9148	1.4525	0.0882299
138	846	C	11	3	49.2	100.99	115.13	98.949	1.477	0.484256
138	846	C	11	3	51.5	101.01	115.15	98.9661	1.431	-0.26184
138	846	C	11	3	53.1	101.03	115.17	98.9833	1.4493	0.0347704
138	846	C	11	3	55.3	101.05	115.19	99.0005	1.476	0.466437
138	846	C	11	3	57.6	101.08	115.22	99.0271	1.485	0.611512
138	846	C	11	3	60	101.1	115.24	99.0443	1.405	-0.685638
138	846	C	11	3	62.3	101.12	115.26	99.0615	1.415	-0.524103
138	846	C	11	3	64.6	101.15	115.29	99.0882	1.452	0.0747877
138	846	C	11	3	67	101.17	115.31	99.1053	1.472	0.398404
138	846	C	11	3	68.5	101.18	115.32	99.1139	1.4395	-0.128615
138	846	C	11	3	70.7	101.21	115.35	99.1397	1.379	-1.10998
138	846	C	11	3	73.1	101.23	115.37	99.1577	1.381	-1.0781
138	846	C	11	3	75.4	101.25	115.39	99.1749	1.43	-0.284455
138	846	C	11	3	77.7	101.28	115.42	99.2007	1.429	-0.301464
138	846	C	11	3	80.1	101.3	115.44	99.2187	1.388	-0.966517
138	846	C	11	3	82.4	101.32	115.46	99.2359	1.404	-0.707718
138	846	C	11	3	83	101.33	115.47	99.2445	1.412	-0.57833
138	846	C	11	3	84	101.34	115.48	99.2531	1.401	-0.756874
138	846	C	11	3	86.2	101.36	115.5	99.2703	1.447	-0.0118561
138	846	C	11	3	88.5	101.38	115.52	99.2883	1.414	-0.547242
138	846	C	11	3	90.9	101.41	115.55	99.3141	1.447	-0.0131904
138	846	C	11	3	93.2	101.43	115.57	99.3313	1.443	-0.0785557
138	846	C	11	3	95.5	101.45	115.59	99.3493	1.399	-0.792236
138	846	C	11	3	98	101.48	115.62	99.3751	1.4433	-0.0744874
138	846	C	11	3	99.3	101.49	115.63	99.3837	1.508	0.973346
138	846	C	11	3	101.7	101.52	115.66	99.4103	1.438	-0.161996
138	846	C	11	3	104	101.54	115.68	99.4275	1.426	-0.357024
138	846	C	11	3	106.3	101.56	115.7	99.4447	1.431	-0.276518
138	846	C	11	3	108.7	101.59	115.73	99.4713	1.44	-0.131443
138	846	C	11	3	111	101.61	115.75	99.4885	1.523	1.21326
138	846	C	11	3	113.3	101.63	115.77	99.5057	1.498	0.807537
138	846	C	11	3	115.7	101.66	115.8	99.5315	1.502	0.871558
138	846	C	11	3	118	101.68	115.82	99.5495	1.415	-0.539043
138	846	C	11	3	120.3	101.7	115.84	99.5667	1.482	0.546345
138	846	C	11	3	122.7	101.73	115.87	99.5925	1.471	0.367254
138	846	C	11	3	125	101.75	115.89	99.6105	1.492	0.707082
138	846	C	11	3	127.4	101.77	115.91	99.6277	1.42	-0.460407
138	846	C	11	3	129.7	101.8	115.94	99.6535	1.452	0.0574381
138	846	C	11	3	132	101.82	115.96	99.6715	1.509	0.980747
138	846	C	11	3	134.4	101.84	115.98	99.6887	1.451	0.0401632
138	846	C	11	3	136.7	101.87	116.01	99.7135	1.443	-0.0902995
138	846	C	11	3	139	101.89	116.03	99.7299	1.495	0.751964
138	846	C	11	3	141.4	101.91	116.05	99.7472	1.496	0.767639
138	846	C	11	3	143.7	101.94	116.08	99.7718	1.523	1.20445
138	846	C	11	3	146	101.96	116.1	99.7882	1.476	0.442152
138	846	C	11	4	2.7	102.03	116.17	99.8464	1.482	0.537536
138	846	C	11	4	5.5	102.06	116.2	99.8718	1.495	0.747429
138	846	C	11	4	8	102.08	116.22	99.8882	1.4925	0.706385
138	846	C	11	4	9.3	102.09	116.23	99.8964	1.439	-0.160999
138	846	C	11	4	11.7	102.12	116.26	99.9218	1.482	0.535131
138	846	C	11	4	13.9	102.14	116.28	99.9382	1.453	0.0645703
138	846	C	11	4	16.4	102.16	116.3	99.9538	1.45	0.0154133
138	846	C	11	4	18.6	102.19	116.33	99.9784	1.431	-0.293339
138	846	C	11	4	21.1	102.21	116.35	99.994	1.486	0.597557
138	846	C	11	4	23	102.23	116.37	100.01	1.4488	-0.00536364
138	846	C	11	4	24.3	102.24	116.38	100.019	1.484	0.564338
138	846	C	11	4	26.8	102.27	116.41	100.042	1.435	-0.230639
138	846	C	11	4	29	102.29	116.43	100.059	1.513	1.03303
138	846	C	11	4	31.4	102.31	116.45	100.074	1.433	-0.26412
138	846	C	11	4	33.6	102.34	116.48	100.099	1.417	-0.524241
138	846	C	11	4	36.1	102.36	116.5	100.115	1.445	-0.0709637
138	846	C	11	4	38	102.38	116.52	100.131	1.438	-0.184948
138	846	C	11	4	39.7	102.4	116.54	100.147	1.439	-0.169273
138	846	C	11	4	42.2	102.42	116.56	100.163	1.392	-0.931579
138	846	C	11	4	44.4	102.44	116.58	100.179	1.474	0.396922
138	846	C	11	4	46.9	102.47	116.61	100.203	1.463	0.217843
138	846	C	11	4	49	102.49	116.63	100.22	1.502	0.849403
138	846	C	11	4	51.5	102.51	116.65	100.235	1.481	0.508516
138	846	C	11	4	53	102.53	116.67	100.252	1.4788	0.472867
138	846	C	11	4	55.2	102.55	116.69	100.268	1.407	-0.691931
138	846	C	11	4	57.6	102.58	116.72	100.293	1.42	-0.482025
138	846	C	11	4	60	102.6	116.74	100.31	1.427	-0.36911
138	846	C	11	4	62.2	102.62	116.76	100.327	1.473	0.375914
138	846	C	11	4	64.7	102.65	116.79	100.352	1.433	-0.273191
138	846	C	11	4	66.9	102.67	116.81	100.369	1.485	0.569073
138	846	C	11	4	68.5	102.68	116.82	100.377	1.4597	0.158208
138	846	C	11	4	70.8	102.71	116.85	100.403	1.428	-0.35584
138	846	C	11	4	73	102.73	116.87	100.419	1.404	-0.74536
138	846	C	11	4	75.4	102.75	116.89	100.437	1.425	-0.405532
138	846	C	11	4	77.6	102.78	116.92	100.462	1.459	0.144738
138	846	C	11	4	80.1	102.8	116.94	100.479	1.431	-0.309613
138	846	C	11	4	82.3	102.82	116.96	100.495	1.373	-1.25014
138	846	C	11	4	83	102.83	116.97	100.504	1.4408	-0.151579
138	846	C	11	4	83.7	102.84	116.98	100.512	1.464	0.224173
138	846	C	11	4	86.2	102.86	117	100.529	1.453	0.0453529
138	846	C	11	4	88.4	102.88	117.02	100.546	1.391	-0.960063
138	846	C	11	4	90.9	102.91	117.05	100.572	1.441	-0.15047
138	846	C	11	4	93.1	102.93	117.07	100.588	1.491	0.659384
138	846	C	11	4	95.6	102.96	117.1	100.614	1.422	-0.459759
138	846	C	11	4	98	102.98	117.12	100.63	1.4645	0.228534
138	846	C	11	4	99.4	102.99	117.13	100.639	1.411	-0.638838
138	846	C	11	4	101.5	103.01	117.15	100.657	1.485	0.560001
138	846	C	11	4	104	103.04	117.18	100.685	1.412	-0.623972
138	846	C	11	4	106.2	103.06	117.2	100.705	1.443	-0.122063
138	846	C	11	4	108.7	103.09	117.23	100.734	1.457	0.104044
138	846	C	11	4	110.9	103.11	117.25	100.754	1.429	-0.350308
138	846	C	11	4	113.4	103.13	117.27	100.773	1.408	-0.691208
138	846	C	11	4	115.6	103.16	117.3	100.802	1.434	-0.270599
138	846	C	11	4	118	103.18	117.32	100.821	1.477	0.425792
138	846	C	11	4	120.2	103.2	117.34	100.841	1.495	0.717001
138	846	C	11	4	122.7	103.23	117.37	100.87	1.492	0.667583
138	846	C	11	4	124.9	103.25	117.39	100.89	1.437	-0.224384
138	846	C	11	4	127.4	103.27	117.41	100.911	1.475	0.390978
138	846	C	11	4	129.6	103.3	117.44	100.94	1.418	-0.53366
138	846	C	11	4	132.1	103.32	117.46	100.959	1.441	-0.161423
138	846	C	11	4	134.2	103.34	117.48	100.979	1.477	0.421531
138	846	C	11	4	136.7	103.37	117.51	101.007	1.431	-0.324827
138	846	C	11	4	138.9	103.39	117.53	101.026	1.491	0.647099
138	846	C	11	4	141.4	103.41	117.55	101.046	1.473	0.354831
138	846	C	11	4	143.6	103.44	117.58	101.076	1.466	0.24057
138	846	C	11	4	146.1	103.46	117.6	101.095	1.477	0.418328
138	846	C	11	5	2.8	103.53	117.67	101.163	1.496	0.724402
138	846	C	11	5	5.6	103.56	117.7	101.193	1.481	0.48048
138	846	C	11	5	8	103.58	117.72	101.213	1.4423	-0.146744
138	846	C	11	5	9.3	103.59	117.73	101.222	1.478	0.431063
138	846	C	11	5	11.8	103.62	117.76	101.251	1.478	0.430265
138	846	C	11	5	14	103.64	117.78	101.27	1.39	-0.996559
138	846	C	11	5	16.5	103.67	117.81	101.3	1.388	-1.02977
138	846	C	11	5	18.7	103.69	117.83	101.32	1.449	-0.0416322
138	846	C	11	5	21.1	103.71	117.85	101.34	1.484	0.5251
138	846	C	11	5	23	103.73	117.87	101.36	1.4452	-0.104829
138	846	C	11	5	24.8	103.75	117.89	101.38	1.449	-0.0432334
138	846	C	11	5	27.3	103.77	117.91	101.4	1.494	0.685576
138	846	C	11	5	29.5	103.79	117.93	101.42	1.445	-0.109132
138	846	C	11	5	31.9	103.82	117.96	101.449	1.464	0.198018
138	846	C	11	5	34.1	103.84	117.98	101.469	1.434	-0.288754
138	846	C	11	5	36.6	103.87	118.01	101.502	1.534	1.33125
138	846	C	11	5	38	103.88	118.02	101.512	1.4693	0.282848
138	846	C	11	5	40.3	103.9	118.04	101.533	1.424	-0.452432
138	846	C	11	5	42.7	103.93	118.07	101.566	1.43	-0.35599
138	846	C	11	5	44.9	103.95	118.09	101.59	1.508	0.90768
138	846	C	11	5	47.4	103.97	118.11	101.615	1.446	-0.0977296
138	846	C	11	5	49.6	104	118.14	101.654	1.437	-0.244396
138	846	C	11	5	52	104.02	118.16	101.678	1.469	0.273715
138	846	C	11	5	53.2	104.03	118.17	101.691	1.464	0.192411
138	846	C	11	5	55.7	104.06	118.2	101.728	1.485	0.531966
138	846	C	11	5	57.8	104.08	118.22	101.754	1.454	0.0289963
138	846	C	11	5	60.3	104.1	118.24	101.78	1.443	-0.149822
138	846	C	11	5	62.5	104.13	118.27	101.817	1.507	0.886672
138	846	C	11	5	65	104.15	118.29	101.843	1.423	-0.475309
138	846	C	11	5	67.2	104.17	118.31	101.868	1.487	0.561447
138	846	C	11	5	68	104.18	118.32	101.88	1.4796	0.441243
138	846	C	11	5	68.6	104.19	118.33	101.893	1.489	0.593333
138	846	C	11	5	71.1	104.21	118.35	101.919	1.503	0.819711
138	846	C	11	5	73.3	104.23	118.37	101.944	1.476	0.381558
138	846	C	11	5	75.7	104.26	118.4	101.976	1.459	0.105231
138	846	C	11	5	77.9	104.28	118.42	101.998	1.443	-0.154632
138	846	C	11	5	80.4	104.3	118.44	102.02	1.424	-0.46311
138	846	C	11	5	83	104.33	118.47	102.052	1.4765	0.387003
138	846	C	11	5	84	104.34	118.48	102.062	1.5	0.767614
138	846	C	11	5	86.4	104.36	118.5	102.084	1.472	0.313263
138	846	C	11	5	88.9	104.39	118.53	102.116	1.467	0.231424
138	846	C	11	5	91.1	104.41	118.55	102.136	1.435	-0.287757
138	846	C	11	5	93.5	104.43	118.57	102.155	1.44	-0.207251
138	846	C	11	5	95.7	104.46	118.6	102.184	1.442	-0.17564
138	846	C	11	5	98	104.48	118.62	102.203	1.4547	0.0291246
138	846	C	11	5	99.7	104.5	118.64	102.221	1.481	0.455398
138	846	C	11	5	101.9	104.52	118.66	102.239	1.448	-0.0799936
138	846	C	11	5	104.3	104.54	118.68	102.257	1.538	1.37823
138	846	C	11	5	106.6	104.57	118.71	102.283	1.427	-0.421693
138	846	C	11	5	109	104.59	118.73	102.301	1.481	0.452993
138	846	C	11	5	111.2	104.61	118.75	102.318	1.475	0.355217
138	846	C	11	5	113.7	104.64	118.78	102.344	1.458	0.0788809
138	846	C	11	5	115.9	104.66	118.8	102.362	1.505	0.840108
138	846	C	11	5	118.4	104.68	118.82	102.38	1.401	-0.846027
138	846	C	11	5	120.6	104.71	118.85	102.405	1.511	0.936027
138	846	C	11	5	123	104.73	118.87	102.422	1.459	0.0926856
138	846	C	11	5	125.2	104.75	118.89	102.439	1.41	-0.702023
138	846	C	11	5	127.7	104.78	118.92	102.465	1.431	-0.362469
138	846	C	11	5	129.9	104.8	118.94	102.483	1.474	0.333935
138	846	C	11	5	132.4	104.82	118.96	102.5	1.484	0.495482
138	846	C	11	5	134.6	104.85	118.99	102.526	1.441	-0.202255
138	846	C	11	5	137.1	104.87	119.01	102.542	1.445	-0.13796
138	846	C	11	5	139.3	104.89	119.03	102.559	1.428	-0.41403
138	846	C	11	5	141.7	104.92	119.06	102.585	1.46	0.103823
138	846	C	11	5	143.9	104.94	119.08	102.602	1.448	-0.0912041
138	846	C	11	6	2.8	105.03	119.17	102.678	1.428	-0.417768
138	846	C	11	6	5.6	105.06	119.2	102.703	1.429	-0.402354
138	846	C	11	6	8	105.08	119.22	102.72	1.4793	0.412896
138	846	C	11	6	9.4	105.09	119.23	102.728	1.417	-0.597644
138	846	C	11	6	11.8	105.12	119.26	102.753	1.472	0.292978
138	846	C	11	6	14	105.14	119.28	102.77	1.475	0.341062
138	846	C	11	6	16.5	105.17	119.31	102.795	1.469	0.243025
138	846	C	11	6	18.7	105.19	119.33	102.811	1.443	-0.178917
138	846	C	11	6	21.2	105.21	119.35	102.828	1.449	-0.0822041
138	846	C	11	6	23	105.23	119.37	102.846	1.467	0.208996
138	846	C	11	6	24.8	105.25	119.39	102.862	1.456	0.0301825
138	846	C	11	6	27.3	105.27	119.41	102.878	1.465	0.175515
138	846	C	11	6	29.5	105.29	119.43	102.895	1.502	0.774667
138	846	C	11	6	32	105.32	119.46	102.92	1.486	0.514546
138	846	C	11	6	34.2	105.34	119.48	102.937	1.432	-0.36121
138	846	C	11	6	36.7	105.37	119.51	102.962	1.445	-0.151305
138	846	C	11	6	38.1	105.38	119.52	102.97	1.4803	0.421107
138	846	C	11	6	40.3	105.4	119.54	102.987	1.488	0.544825
138	846	C	11	6	42.6	105.43	119.57	103.011	1.465	0.171254
138	846	C	11	6	45.1	105.45	119.59	103.027	1.517	1.01352
138	846	C	11	6	47.3	105.47	119.61	103.044	1.525	1.14264
138	846	C	11	6	49.8	105.5	119.64	103.069	1.404	-0.819299
138	846	C	11	6	52	105.52	119.66	103.085	1.385	-1.12778
138	846	C	11	6	53.5	105.53	119.67	103.093	1.4368	-0.287944
138	846	C	11	6	55.9	105.56	119.7	103.117	1.483	0.459522
138	846	C	11	6	58.1	105.58	119.72	103.133	1.47	0.248283
138	846	C	11	6	60.6	105.61	119.75	103.157	1.448	-0.109088
138	846	C	11	6	62.8	105.63	119.77	103.173	1.422	-0.531019
138	846	C	11	6	65.3	105.65	119.79	103.188	1.404	-0.823299
138	846	C	11	6	67.5	105.67	119.81	103.204	1.43	-0.402429
138	846	C	11	6	68	105.68	119.82	103.211	1.472	0.278026
138	846	C	11	6	68.9	105.69	119.83	103.22	1.419	-0.581246
138	846	C	11	6	71.5	105.71	119.85	103.235	1.463	0.131356
138	846	C	11	6	73.7	105.74	119.88	103.259	1.427	-0.452918
138	846	C	11	6	76	105.76	119.9	103.275	1.422	-0.534495
138	846	C	11	6	78.2	105.78	119.92	103.291	1.418	-0.599862
138	846	C	11	6	80.7	105.81	119.95	103.315	1.453	-0.0333873
138	846	C	11	6	82.9	105.83	119.97	103.331	1.4245	-0.495844
138	846	C	11	6	84.6	105.85	119.99	103.346	1.403	-0.844843
138	846	C	11	6	86.7	105.87	120.01	103.362	1.424	-0.505014
138	846	C	11	6	89.2	105.89	120.03	103.378	1.39	-1.05662
138	846	C	11	6	91.4	105.91	120.05	103.393	1.338	-1.89994
138	846	C	11	6	93.9	105.94	120.08	103.417	1.445	-0.166519
138	846	C	11	6	96.1	105.96	120.1	103.433	1.433	-0.361547
138	846	C	11	6	98	105.98	120.12	103.449	1.4038	-0.834812
138	846	C	11	6	100	106	120.14	103.464	1.474	0.3019
138	846	C	11	6	102.2	106.02	120.16	103.48	1.454	-0.0227848
138	846	C	11	6	104.7	106.05	120.19	103.502	1.369	-1.40128
138	846	C	11	6	106.9	106.07	120.21	103.516	1.375	-1.30459
138	846	C	11	6	109.4	106.09	120.23	103.53	1.484	0.461578
138	846	C	11	6	111.6	106.12	120.26	103.553	1.486	0.49319
138	846	C	11	6	114.1	106.14	120.28	103.57	1.367	-1.43604
138	846	C	11	6	116.3	106.16	120.3	103.585	1.438	-0.285851
138	846	C	11	6	118.7	106.19	120.33	103.61	1.405	-0.821505
138	846	C	11	6	120.9	106.21	120.35	103.626	1.438	-0.287184
138	846	C	11	6	123.4	106.23	120.37	103.642	1.374	-1.32502
138	846	C	11	6	125.6	106.26	120.4	103.666	1.401	-0.888205
138	846	C	11	6	127.9	106.28	120.42	103.682	1.442	-0.224222
138	846	C	11	6	130.4	106.3	120.44	103.698	1.433	-0.370618
138	846	C	11	6	132.6	106.33	120.47	103.721	1.468	0.19585
138	846	C	11	6	135.1	106.35	120.49	103.738	1.471	0.243935
138	846	D	12	1	30.5	106.6	120.1	103.749	1.429	-0.439019
138	846	C	11	6	137.3	106.37	120.51	103.753	1.444	-0.194206
138	846	D	12	1	33	106.63	120.13	103.773	1.402	-0.853628
138	846	C	11	6	139.8	106.4	120.54	103.777	1.393	-1.0216
138	846	D	12	1	34.2	106.64	120.14	103.781	1.34	-1.80403
138	846	C	11	6	142	106.42	120.56	103.792	1.435	-0.341411
138	846	D	12	1	36.7	106.67	120.17	103.805	1.426	-0.48697
138	846	C	11	6	144.4	106.44	120.58	103.808	1.403	-0.860593
138	846	D	12	1	38.9	106.69	120.19	103.821	1.432	-0.395588
138	846	D	12	1	41.3	106.71	120.21	103.837	1.424	-0.518749
138	846	D	12	1	43	106.73	120.23	103.853	1.439	-0.289447
138	846	D	12	1	45	106.75	120.25	103.868	1.492	0.522188
138	846	D	12	1	47.4	106.77	120.27	103.884	1.441	-0.259928
138	846	D	12	1	49.9	106.8	120.3	103.908	1.441	-0.260775
138	846	D	12	1	52.1	106.82	120.32	103.924	1.443	-0.230691
138	846	D	12	1	53.5	106.83	120.33	103.932	1.403	-0.843955
138	846	D	12	1	56	106.86	120.36	103.955	1.352	-1.62635
138	846	D	12	1	58.2	106.88	120.38	103.971	1.382	-1.16718
138	846	D	12	1	60.7	106.91	120.41	103.994	1.445	-0.202585
138	846	D	12	1	63	106.93	120.43	104.01	1.404	-0.831456
138	846	D	12	1	64.4	106.94	120.44	104.017	1.403	-0.847063
138	846	D	12	1	66.7	106.97	120.47	104.041	1.457	-0.0203864
138	846	D	12	1	68.9	106.99	120.49	104.056	1.383	-1.15497
138	846	D	12	1	71.4	107.01	120.51	104.071	1.406	-0.803067
138	846	D	12	1	73	107.03	120.53	104.087	1.425	-0.512466
138	846	D	12	1	75.2	107.05	120.55	104.102	1.451	-0.114594
138	846	D	12	1	77.4	107.07	120.57	104.117	1.442	-0.25308
138	846	D	12	1	79.9	107.1	120.6	104.139	1.392	-1.02015
138	846	D	12	1	82.1	107.12	120.62	104.154	1.385	-1.12799
138	846	D	12	1	83	107.13	120.63	104.162	1.43	-0.438669
138	846	D	12	1	83.7	107.14	120.64	104.169	1.425	-0.515574
138	846	D	12	1	86	107.16	120.66	104.184	1.423	-0.546788
138	846	D	12	1	88.3	107.18	120.68	104.198	1.43	-0.440082
138	846	D	12	1	90.7	107.21	120.71	104.22	1.366	-1.4217
138	846	D	12	1	93	107.23	120.73	104.235	1.426	-0.502793
138	846	D	12	1	94.3	107.24	120.74	104.242	1.428	-0.472426
138	846	D	12	1	96.8	107.27	120.77	104.263	1.406	-0.810413
138	846	D	12	1	99	107.29	120.79	104.277	1.406	-0.810978
138	846	D	12	1	101.5	107.31	120.81	104.291	1.373	-1.31725
138	846	D	12	1	103	107.33	120.83	104.305	1.414	-0.689512
138	846	D	12	1	105.2	107.35	120.85	104.319	1.436	-0.352938
138	846	D	12	1	107.4	107.37	120.87	104.333	1.426	-0.506748
138	846	D	12	1	109.9	107.4	120.9	104.354	1.411	-0.737464
138	846	D	12	1	112.1	107.42	120.92	104.368	1.424	-0.53881
138	846	D	12	1	114.5	107.44	120.94	104.382	1.395	-0.983786
138	846	D	12	1	116.8	107.47	120.97	104.404	1.414	-0.693468
138	846	D	12	1	121.4	107.51	121.01	104.433	1.415	-0.679274
138	846	D	12	1	123.8	107.54	121.04	104.454	1.402	-0.87934
138	846	D	12	1	126.1	107.56	121.06	104.469	1.446	-0.205626
138	846	D	12	1	128.4	107.58	121.08	104.484	1.395	-0.987742
138	846	D	12	1	130.7	107.61	121.11	104.507	1.431	-0.436907
138	846	D	12	1	133.1	107.63	121.13	104.522	1.44	-0.299551
138	846	D	12	1	135.4	107.65	121.15	104.537	1.421	-0.591282
138	846	D	12	1	137.8	107.68	121.18	104.56	1.435	-0.377587
138	846	D	12	1	140.1	107.7	121.2	104.575	1.376	-1.2823
138	846	D	12	1	142.4	107.72	121.22	104.59	1.406	-0.823128
138	846	D	12	1	144.7	107.75	121.25	104.612	1.335	-1.91202
138	846	D	12	2	3	107.83	121.33	104.674	1.433	-0.412474
138	846	D	12	2	4.7	107.85	121.35	104.69	1.455	-0.0758997
138	846	D	12	2	7.1	107.87	121.37	104.705	1.428	-0.490227
138	846	D	12	2	9.3	107.89	121.39	104.721	1.385	-1.14975
138	846	D	12	2	13.1	107.93	121.43	104.753	1.441	-0.292703
138	846	D	12	2	15.4	107.95	121.45	104.768	1.455	-0.0787252
138	846	D	12	2	17.8	107.98	121.48	104.793	1.433	-0.416712
138	846	D	12	2	20.1	108	121.5	104.809	1.46	-0.00351538
138	846	D	12	2	22.4	108.02	121.52	104.825	1.422	-0.586412
138	846	D	12	2	23.5	108.03	121.53	104.833	1.453	-0.111635
138	846	D	12	2	25.8	108.06	121.56	104.857	1.459	-0.0205352
138	846	D	12	2	28.1	108.08	121.58	104.874	1.507	0.714476
138	846	D	12	2	30.5	108.1	121.6	104.89	1.452	-0.128937
138	846	D	12	2	33	108.13	121.63	104.914	1.463	0.038785
138	846	D	12	2	34	108.14	121.64	104.922	1.46	-0.00747107
138	846	D	12	2	36.4	108.16	121.66	104.939	1.426	-0.52907
138	846	D	12	2	38.7	108.19	121.69	104.964	1.502	0.634746
138	846	D	12	2	41.1	108.21	121.71	104.981	1.522	0.940671
138	846	D	12	2	43	108.23	121.73	104.998	1.468	0.112582
138	846	D	12	2	44.9	108.25	121.75	105.015	1.475	0.219289
138	846	D	12	2	47.2	108.27	121.77	105.033	1.491	0.463916
138	846	D	12	2	49.5	108.29	121.79	105.05	1.453	-0.118981
138	846	D	12	2	51.9	108.32	121.82	105.076	1.391	-1.06995
138	846	D	12	2	53	108.33	121.83	105.084	1.463	0.0331341
138	846	D	12	2	53.6	108.34	121.84	105.093	1.448	-0.197016
138	846	D	12	2	55.7	108.36	121.86	105.11	1.407	-0.825886
138	846	D	12	2	58	108.38	121.88	105.127	1.414	-0.71918
138	846	D	12	2	60.4	108.4	121.9	105.144	1.389	-1.10286
138	846	D	12	2	63	108.43	121.93	105.17	1.416	-0.689944
138	846	D	12	2	64.3	108.44	121.94	105.179	1.424	-0.56763
138	846	D	12	2	66.5	108.46	121.96	105.196	1.389	-1.10455
138	846	D	12	2	68.8	108.49	121.99	105.222	1.409	-0.798911
138	846	D	12	2	71.2	108.51	122.01	105.239	1.327	-2.05609
138	846	D	12	2	73	108.53	122.03	105.256	1.396	-0.999259
138	846	D	12	2	74.9	108.55	122.05	105.273	1.398	-0.969176
138	846	D	12	2	77.2	108.57	122.07	105.29	1.456	-0.0809187
138	846	D	12	2	79.6	108.6	122.1	105.316	1.403	-0.893966
138	846	D	12	2	81.9	108.62	122.12	105.333	1.435	-0.404146
138	846	D	12	2	83.5	108.63	122.13	105.342	1.43	-0.481051
138	846	D	12	2	85.7	108.66	122.16	105.368	1.436	-0.389952
138	846	D	12	2	88	108.68	122.18	105.385	1.407	-0.834928
138	846	D	12	2	90.4	108.7	122.2	105.402	1.404	-0.881467
138	846	D	12	2	93	108.73	122.23	105.428	1.392	-1.06621
138	846	D	12	2	94.1	108.74	122.24	105.436	1.391	-1.08182
138	846	D	12	2	96.5	108.76	122.26	105.454	1.453	-0.132261
138	846	D	12	2	98.8	108.79	122.29	105.479	1.401	-0.929983
138	846	D	12	2	101.1	108.81	122.31	105.497	1.335	-1.94197
138	846	D	12	2	103	108.83	122.33	105.514	1.371	-1.39085
138	846	D	12	2	104.9	108.85	122.35	105.531	1.375	-1.33012
138	846	D	12	2	107.3	108.87	122.37	105.548	1.353	-1.66782
138	846	D	12	2	109.6	108.9	122.4	105.574	1.435	-0.412058
138	846	D	12	2	111.9	108.92	122.42	105.591	1.394	-1.04093
138	846	D	12	2	114.3	108.94	122.44	105.608	1.324	-2.11421
138	846	D	12	2	116.6	108.97	122.47	105.634	1.399	-0.965718
138	846	D	12	2	118.9	108.99	122.49	105.651	1.389	-1.11953
138	846	D	12	2	121.3	109.01	122.51	105.668	1.367	-1.45723
138	846	D	12	2	123.6	109.04	122.54	105.694	1.405	-0.875749
138	846	D	12	2	125.9	109.06	122.56	105.712	1.406	-0.860989
138	846	D	12	2	130.6	109.11	122.61	105.755	1.391	-1.09227
138	846	D	12	2	132.9	109.13	122.63	105.773	1.439	-0.357258
138	846	D	12	2	135.3	109.15	122.65	105.79	1.4	-0.955479
138	846	C	12	1	2.8	107.03	122.58	105.816	1.474	0.23677
138	846	D	12	2	137.6	109.18	122.68	105.818	1.441	-0.328022
138	846	D	12	2	139.9	109.2	122.7	105.834	1.452	-0.160017
138	846	D	12	2	142.3	109.22	122.72	105.851	1.4	-0.957457
138	846	C	12	1	8	107.08	122.63	105.859	1.3962	-1.02606
138	846	C	12	1	9.3	107.09	122.64	105.868	1.369	-1.4667
138	846	D	12	2	144.6	109.25	122.75	105.877	1.436	-0.406622
138	846	C	12	1	11.5	107.11	122.66	105.884	1.409	-0.818863
138	846	C	12	1	13.9	107.14	122.69	105.911	1.419	-0.65759
138	846	C	12	1	16.1	107.16	122.71	105.927	1.431	-0.463621
138	846	C	12	1	18.6	107.19	122.74	105.953	1.427	-0.529262
138	846	C	12	1	20.8	107.21	122.76	105.97	1.427	-0.529798
138	846	C	12	1	23	107.23	122.78	105.987	1.4238	-0.581657
138	846	C	12	1	24.6	107.25	122.8	106.005	1.444	-0.255323
138	846	C	12	1	27.1	107.27	122.82	106.021	1.484	0.392448
138	846	C	12	1	29.3	107.29	122.84	106.039	1.428	-0.515718
138	846	C	12	1	31.8	107.32	122.87	106.064	1.411	-0.792049
138	846	C	12	1	34	107.34	122.89	106.082	1.42	-0.646712
138	846	C	12	1	36.5	107.36	122.91	106.098	1.465	0.0820982
138	846	C	12	1	38	107.38	122.93	106.116	1.447	-0.21018
138	846	C	12	1	40.1	107.4	122.95	106.133	1.462	0.0324066
138	846	C	12	1	42.6	107.43	122.98	106.158	1.444	-0.260133
138	846	C	12	1	44.8	107.45	123	106.176	1.377	-1.34658
138	846	C	12	1	47.3	107.47	123.02	106.193	1.43	-0.488106
138	846	C	12	1	49.5	107.49	123.04	106.21	1.432	-0.456232
138	846	C	12	1	51.9	107.52	123.07	106.235	1.414	-0.748774
138	846	C	12	1	53.5	107.53	123.08	106.244	1.4035	-0.919218
138	846	C	12	1	55.6	107.56	123.11	106.27	1.415	-0.733623
138	846	C	12	1	58	107.58	123.13	106.287	1.412	-0.782791
138	846	C	12	1	60.3	107.6	123.15	106.304	1.365	-1.54507
138	846	C	12	1	62.7	107.63	123.18	106.33	1.374	-1.40003
138	846	C	12	1	64.9	107.65	123.2	106.347	1.4	-0.979152
138	846	C	12	1	67.4	107.67	123.22	106.364	1.393	-1.09314
138	846	C	12	1	68	107.68	123.23	106.372	1.3738	-1.40465
138	846	C	12	1	68.7	107.69	123.24	106.381	1.396	-1.04504
138	846	C	12	1	71.2	107.71	123.26	106.398	1.379	-1.32116
138	846	C	12	1	73.4	107.73	123.28	106.414	1.367	-1.51616
138	846	C	12	1	75.8	107.76	123.31	106.44	1.333	-2.06803
138	846	C	12	1	78	107.78	123.33	106.456	1.355	-1.71192
138	846	C	12	1	80.5	107.81	123.36	106.481	1.377	-1.35617
138	846	C	12	1	83	107.83	123.38	106.497	1.4222	-0.624683
138	846	C	12	1	84.3	107.84	123.39	106.505	1.412	-0.789731
138	846	C	12	1	86.6	107.87	123.42	106.53	1.395	-1.06606
138	846	C	12	1	88.8	107.89	123.44	106.547	1.455	-0.094126
138	846	C	12	1	91.3	107.91	123.46	106.564	1.476	0.245704
138	846	C	12	1	93.5	107.93	123.48	106.58	1.442	-0.305899
138	846	C	12	1	96	107.96	123.51	106.605	1.411	-0.809132
138	846	C	12	1	98	107.98	123.53	106.621	1.4195	-0.671907
138	846	C	12	1	99.6	108	123.55	106.638	1.446	-0.242938
138	846	C	12	1	102	108.02	123.57	106.654	1.432	-0.470375
138	846	C	12	1	104.4	108.04	123.59	106.671	1.403	-0.940937
138	846	C	12	1	106.6	108.07	123.62	106.696	1.392	-1.12002
138	846	C	12	1	109.1	108.09	123.64	106.713	1.425	-0.585695
138	846	C	12	1	111.3	108.11	123.66	106.729	1.446	-0.245866
138	846	C	12	1	113.8	108.14	123.69	106.754	1.41	-0.830152
138	846	C	12	1	116	108.16	123.71	106.77	1.443	-0.295831
138	846	C	12	1	118.4	108.18	123.73	106.787	1.454	-0.118075
138	846	C	12	1	120.7	108.21	123.76	106.812	1.419	-0.686149
138	846	C	12	1	123.1	108.23	123.78	106.829	1.456	-0.0869938
138	846	C	12	1	125.3	108.25	123.8	106.846	1.41	-0.83308
138	846	C	12	1	127.8	108.28	123.83	106.87	1.401	-0.97975
138	846	C	12	1	130	108.3	123.85	106.887	1.433	-0.46164
138	846	C	12	1	132.5	108.32	123.87	106.903	1.433	-0.462176
138	846	C	12	1	134.7	108.35	123.9	106.928	1.48	0.298785
138	846	C	12	1	137.2	108.37	123.92	106.945	1.38	-1.32253
138	846	C	12	1	139.4	108.39	123.94	106.963	1.384	-1.25824
138	846	C	12	1	141.8	108.42	123.97	106.988	1.437	-0.400012
138	846	C	12	1	144	108.44	123.99	107.005	1.444	-0.287097
138	846	C	12	1	146.5	108.46	124.01	107.022	1.381	-1.3087
138	846	C	12	2	2.6	108.53	124.08	107.082	1.488	0.423649
138	846	C	12	2	5.4	108.55	124.1	107.099	1.418	-0.711431
138	846	C	12	2	8	108.58	124.13	107.125	1.4257	-0.587975
138	846	C	12	2	9.4	108.59	124.14	107.134	1.453	-0.145224
138	846	C	12	2	11.6	108.62	124.17	107.159	1.435	-0.437766
138	846	C	12	2	14	108.64	124.19	107.176	1.466	0.0641404
138	846	C	12	2	16.2	108.66	124.21	107.193	1.434	-0.455036
138	846	C	12	2	18.7	108.69	124.24	107.219	1.447	-0.245143
138	846	C	12	2	20.9	108.71	124.26	107.236	1.433	-0.47258
138	846	C	12	2	23	108.73	124.28	107.253	1.4417	-0.332652
138	846	C	12	2	24.8	108.75	124.3	107.271	1.456	-0.100873
138	846	C	12	2	27	108.77	124.32	107.287	1.438	-0.393146
138	846	C	12	2	29.5	108.79	124.34	107.305	1.487	0.400498
138	846	C	12	2	31.7	108.82	124.37	107.33	1.448	-0.232409
138	846	C	12	2	34.2	108.84	124.39	107.348	1.467	0.0750095
138	846	C	12	2	36.4	108.86	124.41	107.364	1.437	-0.411762
138	846	C	12	2	38	108.88	124.43	107.382	1.4335	-0.469017
138	846	C	12	2	40.3	108.9	124.45	107.399	1.474	0.186867
138	846	C	12	2	42.5	108.92	124.47	107.415	1.373	-1.45062
138	846	C	12	2	45	108.95	124.5	107.441	1.415	-0.770729
138	846	C	12	2	47.2	108.97	124.52	107.458	1.407	-0.900927
138	846	C	12	2	49.6	109	124.55	107.483	1.449	-0.220995
138	846	C	12	2	51.8	109.02	124.57	107.5	1.419	-0.707768
138	846	C	12	2	53	109.03	124.58	107.508	1.4192	-0.705338
138	846	C	12	2	55	109.05	124.6	107.525	1.443	-0.319581
138	846	C	12	2	57.5	109.07	124.62	107.542	1.45	-0.206666
138	846	C	12	2	59.7	109.1	124.65	107.568	1.469	0.100486
138	846	C	12	2	62.1	109.12	124.67	107.584	1.504	0.667222
138	846	C	12	2	64.3	109.14	124.69	107.601	1.443	-0.321986
138	846	C	12	2	66.8	109.17	124.72	107.626	1.424	-0.630738
138	846	C	12	2	68.3	109.18	124.73	107.635	1.4272	-0.579676
138	846	C	12	2	70.4	109.2	124.75	107.652	1.43	-0.534283
138	846	C	12	2	72.9	109.23	124.78	107.677	1.427	-0.583713
138	846	C	12	2	75.1	109.25	124.8	107.694	1.392	-1.15151
138	846	C	12	2	77.5	109.27	124.82	107.71	1.42	-0.698236
138	846	C	12	2	79.7	109.3	124.85	107.736	1.387	-1.23389
138	846	C	12	2	82.2	109.32	124.87	107.752	1.34	-1.99613
138	846	C	12	2	83	109.33	124.88	107.761	1.399	-1.04019
138	846	C	12	2	83.6	109.34	124.89	107.769	1.464	0.0130409
138	846	C	12	2	85.8	109.36	124.91	107.786	1.35	-1.83515
138	846	C	12	2	88.3	109.38	124.93	107.802	1.445	-0.295969
138	846	C	12	2	90.5	109.4	124.95	107.818	1.434	-0.474798
138	846	C	12	2	92.9	109.43	124.98	107.842	1.425	-0.621468
138	846	C	12	2	95.1	109.45	125	107.859	1.414	-0.800285
138	846	C	12	2	98	109.48	125.03	107.882	1.4027	-0.984772
138	846	C	12	2	99	109.49	125.04	107.891	1.425	-0.623063
138	846	C	12	2	101.5	109.51	125.06	107.907	1.442	-0.348065
138	846	C	12	2	103.7	109.54	125.09	107.931	1.395	-1.11063
138	846	C	12	2	106.1	109.56	125.11	107.947	1.52	0.914807
138	846	C	12	2	108.3	109.58	125.13	107.963	1.44	-0.382356
138	846	C	12	2	110.8	109.61	125.16	107.988	1.437	-0.431773
138	846	C	12	2	113	109.63	125.18	108.004	1.422	-0.675421
138	846	C	12	2	115.5	109.65	125.2	108.022	1.439	-0.400423
138	846	C	12	2	117.7	109.68	125.23	108.047	1.393	-1.14678
138	846	C	12	2	120.1	109.7	125.25	108.064	1.445	-0.304516
138	846	C	12	2	122.3	109.72	125.27	108.081	1.46	-0.0619337
138	846	C	12	2	124.8	109.75	125.3	108.106	1.449	-0.241019
138	846	C	12	2	127	109.77	125.32	108.123	1.449	-0.241555
138	846	C	12	2	129.5	109.79	125.34	108.139	1.451	-0.209669
138	846	C	12	2	131.7	109.82	125.37	108.165	1.455	-0.145636
138	846	C	12	2	134.1	109.84	125.39	108.181	1.51	0.745248
138	846	C	12	2	136.4	109.86	125.41	108.199	1.504	0.647472
138	846	C	12	2	138.8	109.89	125.44	108.224	1.426	-0.61753
138	846	C	12	2	141	109.91	125.46	108.241	1.483	0.305775
138	846	C	12	2	143.5	109.93	125.48	108.258	1.486	0.353859
138	846	C	12	2	145.7	109.96	125.51	108.283	1.452	-0.198006
138	846	C	12	3	2.8	110.03	125.58	108.342	1.45	-0.232284
138	846	C	12	3	5.6	110.06	125.61	108.367	1.393	-1.15692
138	846	C	12	3	8	110.08	125.63	108.385	1.4418	-0.365983
138	846	C	12	3	9.4	110.09	125.64	108.393	1.444	-0.331131
138	846	C	12	3	11.8	110.12	125.67	108.419	1.441	-0.380561
138	846	C	12	3	14	110.14	125.69	108.436	1.478	0.21859
138	846	C	12	3	16.5	110.17	125.72	108.462	1.501	0.590579
138	846	C	12	3	18.7	110.19	125.74	108.479	1.416	-0.787625
138	846	C	12	3	21.1	110.21	125.76	108.496	1.439	-0.415375
138	846	C	12	3	23	110.23	125.78	108.513	1.4155	-0.796796
138	846	C	12	3	24.8	110.25	125.8	108.53	1.402	-1.01613
138	846	C	12	3	27.3	110.27	125.82	108.547	1.446	-0.303519
138	846	C	12	3	29.5	110.29	125.84	108.565	1.417	-0.774081
138	846	C	12	3	32	110.32	125.87	108.59	1.401	-1.0342
138	846	C	12	3	34.2	110.34	125.89	108.607	1.368	-1.56962
138	846	C	12	3	36.6	110.37	125.92	108.633	1.428	-0.59793
138	846	C	12	3	38	110.38	125.93	108.641	1.4148	-0.811599
138	846	C	12	3	40.4	110.4	125.95	108.658	1.454	-0.177334
138	846	C	12	3	42.6	110.43	125.98	108.684	1.394	-1.15059
138	846	C	12	3	45.1	110.45	126	108.702	1.389	-1.23217
138	846	C	12	3	47.3	110.47	126.02	108.718	1.448	-0.276443
138	846	C	12	3	49.8	110.5	126.05	108.744	1.446	-0.309662
138	846	C	12	3	52	110.52	126.07	108.76	1.382	-1.34745
138	846	C	12	3	53.3	110.53	126.08	108.769	1.3882	-1.24777
138	846	C	12	3	55.7	110.56	126.11	108.793	1.422	-0.700254
138	846	C	12	3	57.9	110.58	126.13	108.81	1.355	-1.78668
138	846	C	12	3	60.4	110.6	126.15	108.826	1.432	-0.539243
138	846	C	12	3	62.5	110.63	126.18	108.852	1.432	-0.54004
138	846	C	12	3	65	110.65	126.2	108.868	1.447	-0.297451
138	846	C	12	3	67.2	110.67	126.22	108.885	1.459	-0.103499
138	846	C	12	3	68	110.68	126.23	108.893	1.4244	-0.664555
138	846	C	12	3	68.6	110.69	126.24	108.902	1.397	-1.10891
138	846	C	12	3	70.9	110.71	126.26	108.918	1.437	-0.461142
138	846	C	12	3	73.4	110.73	126.28	108.935	1.423	-0.688579
138	846	C	12	3	75.6	110.76	126.31	108.961	1.46	-0.0896927
138	846	C	12	3	78.1	110.78	126.33	108.978	1.486	0.331181
138	846	C	12	3	80.3	110.8	126.35	108.995	1.43	-0.576997
138	846	C	12	3	83	110.83	126.38	109.02	1.4332	-0.526471
138	846	C	12	3	84	110.84	126.39	109.029	1.451	-0.237692
138	846	C	12	3	86.1	110.86	126.41	109.046	1.493	0.442489
138	846	C	12	3	88.6	110.89	126.44	109.072	1.458	-0.125574
138	846	C	12	3	90.8	110.91	126.46	109.089	1.404	-1.00133
138	846	C	12	3	93.3	110.93	126.48	109.106	1.394	-1.16394
138	846	C	12	3	95.5	110.95	126.5	109.123	1.442	-0.386505
138	846	C	12	3	98	110.98	126.53	109.149	1.463	-0.0469415
138	846	C	12	3	99.4	110.99	126.54	109.157	1.42	-0.744139
138	846	C	12	3	101.6	111.02	126.57	109.183	1.507	0.665129
138	846	C	12	3	104.1	111.04	126.59	109.201	1.456	-0.161996
138	846	C	12	3	106.3	111.06	126.61	109.218	1.395	-1.1512
138	846	C	12	3	108.7	111.09	126.64	109.243	1.48	0.225655
138	846	C	12	3	111	111.11	126.66	109.26	1.445	-0.342146
138	846	C	12	3	113.3	111.13	126.68	109.277	1.444	-0.358893
138	846	C	12	3	115.8	111.16	126.71	109.303	1.347	-1.93184
138	846	C	12	3	118	111.18	126.73	109.32	1.402	-1.04096
138	846	C	12	3	120.5	111.2	126.75	109.337	1.46	-0.101438
138	846	C	12	3	122.7	111.23	126.78	109.362	1.455	-0.183278
138	846	C	12	3	125.1	111.25	126.8	109.379	1.421	-0.734869
138	846	C	12	3	127.3	111.27	126.82	109.395	1.393	-1.18922
138	846	C	12	3	129.8	111.3	126.85	109.421	1.443	-0.379639
138	846	C	12	3	132	111.32	126.87	109.438	1.393	-1.19057
138	846	C	12	3	134.5	111.35	126.9	109.463	1.473	0.105261
138	846	C	12	3	136.7	111.37	126.92	109.48	1.445	-0.349087
138	846	C	12	3	139.2	111.39	126.94	109.496	1.422	-0.722408
138	846	C	12	3	141.3	111.41	126.96	109.513	1.352	-1.85745
138	846	C	12	3	143.8	111.44	126.99	109.538	1.418	-0.788572
138	846	C	12	3	146	111.46	127.01	109.554	1.418	-0.789108
138	846	C	12	4	2.7	111.53	127.08	109.611	1.433	-0.547853
138	846	C	12	4	5.5	111.56	127.11	109.635	1.435	-0.516241
138	846	C	12	4	8	111.58	127.13	109.652	1.4657	-0.0197358
138	846	C	12	4	9.5	111.6	127.15	109.668	1.48	0.212036
138	846	C	12	4	11.7	111.62	127.17	109.684	1.451	-0.258513
138	846	C	12	4	14.2	111.64	127.19	109.701	1.441	-0.421132
138	846	C	12	4	16.3	111.66	127.21	109.717	1.41	-0.924103
138	846	C	12	4	18.8	111.69	127.24	109.741	1.431	-0.584536
138	846	C	12	4	21	111.71	127.26	109.758	1.44	-0.439199
138	846	C	12	4	23	111.73	127.28	109.774	1.4502	-0.274961
138	846	C	12	4	24.9	111.75	127.3	109.79	1.406	-0.991338
138	846	C	12	4	27.1	111.77	127.32	109.807	1.445	-0.359765
138	846	C	12	4	29.6	111.8	127.35	109.831	1.433	-0.555067
138	846	C	12	4	31.8	111.82	127.37	109.848	1.416	-0.831124
138	846	C	12	4	34.3	111.84	127.39	109.864	1.488	0.335293
138	846	C	12	4	36.5	111.86	127.41	109.88	1.43	-0.605282
138	846	C	12	4	38	111.88	127.43	109.896	1.4342	-0.538283
138	846	C	12	4	40.4	111.9	127.45	109.913	1.432	-0.573944
138	846	C	12	4	42.6	111.93	127.48	109.938	1.4205	-0.761122
138	846	C	12	4	47.2	111.97	127.52	109.97	1.383	-1.37001
138	846	C	12	4	49.6	112	127.55	109.994	1.39	-1.25736
138	846	C	12	4	51.9	112.02	127.57	110.011	1.427	-0.658176
138	846	C	12	4	53.3	112.03	127.58	110.019	1.4055	-1.00691
138	846	C	12	4	55.7	112.06	127.61	110.043	1.42	-0.772698
138	846	C	12	4	58	112.08	127.63	110.058	1.461	-0.108718
138	846	C	12	4	60.4	112.1	127.65	110.074	1.461	-0.109252
138	846	C	12	4	62.7	112.13	127.68	110.098	1.461	-0.110053
138	846	C	12	4	65	112.15	127.7	110.114	1.434	-0.548202
138	846	C	12	4	67.4	112.17	127.72	110.131	1.456	-0.192162
138	846	C	12	4	68	112.18	127.73	110.139	1.463	-0.0789719
138	846	C	12	4	68.8	112.19	127.74	110.147	1.445	-0.370979
138	846	C	12	4	71.2	112.21	127.76	110.162	1.471	0.0498896
138	846	C	12	4	73.4	112.23	127.78	110.178	1.508	0.649042
138	846	C	12	4	75.8	112.26	127.81	110.203	1.495	0.437542
138	846	C	12	4	78.1	112.28	127.83	110.219	1.558	1.4581
138	846	C	12	4	80.4	112.3	127.85	110.235	1.496	0.452681
138	846	C	12	4	83	112.33	127.88	110.259	1.4923	0.392448
138	846	C	12	4	84.2	112.34	127.89	110.267	1.461	-0.115657
138	846	C	12	4	86.5	112.36	127.91	110.283	1.472	0.0620932
138	846	C	12	4	88.9	112.39	127.94	110.307	1.443	-0.408734
138	846	C	12	4	91.2	112.41	127.96	110.322	1.481	0.206628
138	846	C	12	4	93.5	112.43	127.98	110.337	1.478	0.157473
138	846	C	12	4	95.9	112.46	128.01	110.361	1.496	0.448407
138	846	C	12	4	98	112.48	128.03	110.376	1.4688	0.00756599
138	846	C	12	4	99.7	112.5	128.05	110.392	1.44	-0.460294
138	846	C	12	4	102	112.52	128.07	110.408	1.489	0.333349
138	846	C	12	4	104.3	112.54	128.09	110.424	1.475	0.105912
138	846	C	12	4	106.7	112.57	128.12	110.448	1.43	-0.624234
138	846	C	12	4	109	112.59	128.14	110.465	1.493	0.396323
138	846	C	12	4	111.3	112.61	128.16	110.481	1.428	-0.657715
138	846	C	12	4	113.7	112.64	128.19	110.506	1.46	-0.139879
138	846	C	12	4	116	112.66	128.21	110.521	1.434	-0.561808
138	846	C	12	4	118.3	112.68	128.23	110.538	1.42	-0.789245
138	846	C	12	4	120.7	112.71	128.26	110.562	1.433	-0.579352
138	846	C	12	4	123	112.73	128.28	110.579	1.508	0.635698
138	846	C	12	4	125.4	112.75	128.3	110.595	1.547	1.26721
138	846	C	12	4	127.7	112.78	128.33	110.619	1.459	-0.159815
138	846	C	12	4	130	112.8	128.35	110.636	1.458	-0.176562
138	846	C	12	4	132.4	112.82	128.37	110.652	1.452	-0.274338
138	846	C	12	4	134.7	112.85	128.4	110.677	1.503	0.551454
138	846	C	12	4	137	112.87	128.42	110.692	1.497	0.453678
138	846	C	12	4	139.4	112.89	128.44	110.709	1.441	-0.454488
138	846	C	12	4	141.8	112.92	128.47	110.733	1.47	0.0147305
138	846	C	12	4	144.1	112.94	128.49	110.75	1.484	0.241106
138	846	C	12	5	2.7	113.03	128.58	110.823	1.482	0.206292
138	846	C	12	5	5.4	113.05	128.6	110.84	1.507	0.610951
138	846	C	12	5	8	113.08	128.63	110.864	1.4385	-0.50008
138	846	C	12	5	9.4	113.09	128.64	110.872	1.451	-0.29775
138	846	C	12	5	11.6	113.12	128.67	110.896	1.446	-0.379589
138	846	C	12	5	14.1	113.14	128.69	110.912	1.504	0.559927
138	846	C	12	5	16.2	113.16	128.71	110.928	1.425	-0.721025
138	846	C	12	5	18.7	113.19	128.74	110.952	1.445	-0.397669
138	846	C	12	5	20.9	113.21	128.76	110.968	1.477	0.120445
138	846	C	12	5	23	113.23	128.78	110.984	1.4558	-0.223151
138	846	C	12	5	24.9	113.25	128.8	111	1.467	-0.0427013
138	846	C	12	5	27.1	113.27	128.82	111.016	1.44	-0.480841
138	846	C	12	5	29.6	113.3	128.85	111.04	1.48	0.166668
138	846	C	12	5	31.7	113.32	128.87	111.057	1.463	-0.1094
138	846	C	12	5	34.2	113.34	128.89	111.072	1.482	0.198018
138	846	C	12	5	36.4	113.36	128.91	111.088	1.461	-0.142882
138	846	C	12	5	38	113.38	128.93	111.105	1.4512	-0.302797
138	846	C	12	5	40.1	113.4	128.95	111.12	1.443	-0.435685
138	846	C	12	5	42.3	113.42	128.97	111.136	1.458	-0.193109
138	846	C	12	5	44.8	113.45	129	111.16	1.441	-0.46944
138	846	C	12	5	47	113.47	129.02	111.177	1.483	0.210753
138	846	C	12	5	49.3	113.49	129.04	111.193	1.438	-0.519132
138	846	C	12	5	51.8	113.52	129.07	111.217	1.479	0.144589
138	846	C	12	5	53.3	113.53	129.08	111.225	1.4307	-0.639062
138	846	C	12	5	55.5	113.56	129.11	111.249	1.48	0.159728
138	846	C	12	5	57.9	113.58	129.13	111.265	1.402	-1.10501
138	846	C	12	5	60.1	113.6	129.15	111.281	1.426	-0.716565
138	846	C	12	5	62.6	113.63	129.18	111.305	1.43	-0.652531
138	846	C	12	5	64.8	113.65	129.2	111.321	1.413	-0.928601
138	846	C	12	5	67.3	113.67	129.22	111.337	1.415	-0.896715
138	846	C	12	5	68	113.68	129.23	111.345	1.4232	-0.764076
138	846	C	12	5	68.7	113.69	129.24	111.353	1.406	-1.04312
138	846	C	12	5	70.9	113.71	129.26	111.369	1.437	-0.541211
138	846	C	12	5	73.4	113.73	129.28	111.386	1.447	-0.379664
138	846	C	12	5	75.5	113.75	129.3	111.401	1.405	-1.06093
138	846	C	12	5	78	113.78	129.33	111.425	1.455	-0.251336
138	846	C	12	5	80.2	113.8	129.35	111.441	1.393	-1.25674
138	846	C	12	5	83	113.83	129.38	111.465	1.3978	-1.17921
138	846	C	12	5	84.1	113.84	129.39	111.473	1.391	-1.29026
138	846	C	12	5	86.3	113.86	129.41	111.49	1.378	-1.50146
138	846	C	12	5	88.8	113.89	129.44	111.509	1.4	-1.14571
138	846	C	12	5	91	113.91	129.46	111.521	1.437	-0.546544
138	846	C	12	5	93.5	113.93	129.48	111.533	1.392	-1.27643
138	846	C	12	5	95.7	113.96	129.51	111.551	1.429	-0.677552
138	846	C	12	5	98	113.98	129.53	111.563	1.407	-1.03465
138	846	C	12	5	99.6	114	129.55	111.575	1.44	-0.500329
138	846	C	12	5	101.8	114.02	129.57	111.587	1.394	-1.2464
138	846	C	12	5	104.3	114.04	129.59	111.6	1.423	-0.776935
138	846	C	12	5	106.5	114.06	129.61	111.612	1.36	-1.79851
138	846	C	12	5	108.8	114.09	129.64	111.63	1.434	-0.599974
138	846	C	12	5	111.3	114.11	129.66	111.642	1.378	-1.50819
138	846	C	12	5	113.5	114.13	129.68	111.654	1.425	-0.746918
138	846	C	12	5	116	114.16	129.71	111.672	1.424	-0.763926
138	846	C	12	5	118.2	114.18	129.73	111.684	1.422	-0.796871
138	846	C	12	5	120.6	114.21	129.76	111.702	1.476	0.0775452
138	846	C	12	5	122.8	114.23	129.78	111.714	1.444	-0.441641
138	846	C	12	5	125.3	114.25	129.8	111.726	1.395	-1.23636
138	846	C	12	5	127.5	114.27	129.82	111.738	1.418	-0.864107
138	846	C	12	5	130	114.3	129.85	111.756	1.439	-0.52454
138	846	C	12	5	132.2	114.32	129.87	111.768	1.435	-0.589906
138	846	C	12	5	134.7	114.35	129.9	111.786	1.507	0.57625
138	846	C	12	5	136.9	114.37	129.92	111.798	1.492	0.332602
138	846	C	12	5	139.4	114.39	129.94	111.81	1.42	-0.8349
138	846	C	12	5	141.5	114.42	129.97	111.828	1.42	-0.835697
138	846	C	12	5	144	114.44	129.99	111.84	1.449	-0.366207
138	846	C	12	5	146.2	114.46	130.01	111.852	1.49	0.297775
138	846	C	12	6	2.9	114.53	130.08	111.894	1.43	-0.676555
138	846	C	12	6	5.7	114.56	130.11	111.912	1.467	-0.0776673
138	846	C	12	6	8.2	114.58	130.13	111.924	1.417	-0.888591
138	846	C	12	6	10.4	114.6	130.15	111.936	1.43	-0.678424
138	846	C	12	6	12.8	114.63	130.18	111.954	1.51	0.617393
138	846	C	12	6	15	114.65	130.2	111.966	1.455	-0.274562
138	846	C	12	6	17.6	114.68	130.23	111.984	1.44	-0.518484
138	846	C	12	6	19.7	114.7	130.25	111.996	1.469	-0.0489888
138	846	C	12	6	22.2	114.72	130.27	112.007	1.369	-1.6703
138	846	C	12	6	24.3	114.74	130.29	112.019	1.453	-0.309376
138	846	C	12	6	26.8	114.77	130.32	112.036	1.449	-0.375016
138	846	C	12	6	29	114.79	130.34	112.047	1.417	-0.894198
138	846	C	12	6	31.5	114.81	130.36	112.059	1.423	-0.797482
138	846	C	12	6	33.7	114.84	130.39	112.076	1.42	-0.846911
138	846	C	12	6	36.2	114.86	130.41	112.088	1.406	-1.07435
138	846	C	12	6	38.4	114.88	130.43	112.099	1.367	-1.70693
138	846	C	12	6	40.8	114.91	130.46	112.116	1.411	-0.99464
138	846	C	12	6	43	114.93	130.48	112.128	1.45	-0.36308
138	846	C	12	6	45.5	114.95	130.5	112.14	1.444	-0.460855
138	846	C	12	6	47.7	114.98	130.53	112.157	1.439	-0.542694
138	846	C	12	6	50.1	115	130.55	112.169	1.447	-0.413568
138	846	C	12	6	52.3	115.02	130.57	112.18	1.459	-0.219612
138	846	C	12	6	54.8	115.05	130.6	112.197	1.473	0.00650052
138	846	C	12	6	57	115.07	130.62	112.208	1.446	-0.431648
138	846	C	12	6	59.5	115.1	130.65	112.226	1.434	-0.626938
138	846	C	12	6	61.7	115.12	130.67	112.237	1.456	-0.270899
138	846	C	12	6	64.1	115.14	130.69	112.248	1.433	-0.644208
138	846	C	12	6	66.3	115.16	130.71	112.26	1.446	-0.434041
138	846	C	12	6	68.8	115.19	130.74	112.277	1.431	-0.677963
138	846	C	12	6	71	115.21	130.76	112.288	1.473	0.00222989
138	846	C	12	6	73.4	115.23	130.78	112.299	1.415	-0.938357
138	846	C	12	6	75.6	115.26	130.81	112.316	1.424	-0.793282
138	846	C	12	6	78.1	115.28	130.83	112.328	1.443	-0.485875
138	846	C	12	6	80.3	115.3	130.85	112.339	1.469	-0.0650039
138	846	C	12	6	82.8	115.33	130.88	112.356	1.456	-0.276506
138	846	D	13	1	4.8	115.85	130.45	112.426	1.416	-0.930675
138	846	D	13	1	9.3	115.89	130.49	112.457	1.418	-0.901156
138	846	D	13	1	11.6	115.92	130.52	112.481	1.439	-0.580189
138	846	D	13	1	13.2	115.93	130.53	112.488	1.449	-0.427227
138	846	D	13	1	15.4	115.95	130.55	112.504	1.44	-0.565712
138	846	D	13	1	17.8	115.98	130.58	112.527	1.406	-1.08759
138	846	D	13	1	20.1	116	130.6	112.543	1.434	-0.659072
138	846	D	13	1	22.4	116.02	130.62	112.558	1.428	-0.751584
138	846	D	13	1	23	116.03	130.63	112.566	1.414	-0.96641
138	846	D	13	1	23.9	116.04	130.64	112.574	1.434	-0.660202
138	846	D	13	1	26.2	116.06	130.66	112.589	1.376	-1.54959
138	846	D	13	1	28.5	116.08	130.68	112.604	1.433	-0.676657
138	846	D	13	1	30.9	116.11	130.71	112.626	1.442	-0.539584
138	846	D	13	1	33	116.13	130.73	112.641	1.429	-0.739368
138	846	D	13	1	34.7	116.15	130.75	112.656	1.42	-0.877854
138	846	D	13	1	37	116.17	130.77	112.671	1.454	-0.357385
138	846	D	13	1	39.3	116.19	130.79	112.687	1.434	-0.664441
138	846	D	13	1	41.7	116.22	130.82	112.709	1.383	-1.44684
138	846	D	13	1	43.1	116.23	130.83	112.717	1.454	-0.35908
138	846	D	13	1	45.5	116.25	130.85	112.732	1.513	0.544501
138	846	D	13	1	47.8	116.28	130.88	112.754	1.441	-0.559712
138	846	D	13	1	50.1	116.3	130.9	112.769	1.4	-1.18858
138	846	D	13	1	53	116.33	130.93	112.792	1.433	-0.683721
138	846	D	13	1	53.9	116.34	130.94	112.799	1.456	-0.331539
138	846	D	13	1	56.3	116.36	130.96	112.814	1.447	-0.470025
138	846	D	13	1	58.6	116.39	130.99	112.837	1.468	-0.149058
138	846	D	13	1	60.9	116.41	131.01	112.852	1.397	-1.23766
138	846	D	13	1	63	116.43	131.03	112.867	1.425	-0.809142
138	846	D	13	1	64.7	116.45	131.05	112.882	1.428	-0.763734
138	846	D	13	1	67.1	116.47	131.07	112.897	1.408	-1.07079
138	846	D	13	1	69.4	116.49	131.09	112.912	1.42	-0.88746
138	846	D	13	1	71.7	116.52	131.12	112.935	1.378	-1.53194
138	846	D	13	1	73.2	116.53	131.13	112.942	1.436	-0.643398
138	846	D	13	1	75.5	116.56	131.16	112.965	1.393	-1.3032
138	846	D	13	1	77.8	116.58	131.18	112.98	1.395	-1.27312
138	846	D	13	1	80.2	116.6	131.2	112.996	1.452	-0.400184
138	846	D	13	1	83	116.63	131.23	113.019	1.428	-0.76882
138	846	D	13	1	84	116.64	131.24	113.027	1.404	-1.13689
138	846	D	13	1	86.3	116.66	131.26	113.042	1.488	0.149803
138	846	D	13	1	88.6	116.69	131.29	113.065	1.357	-1.85856
138	846	D	13	1	91	116.71	131.31	113.081	1.429	-0.755756
138	846	D	13	1	93	116.73	131.33	113.097	1.43	-0.740996
138	846	D	13	1	94.7	116.75	131.35	113.112	1.413	-1.00208
138	846	D	13	1	97.1	116.77	131.37	113.128	1.446	-0.496934
138	846	D	13	1	99.4	116.79	131.39	113.144	1.466	-0.191009
138	846	D	13	1	101.8	116.82	131.42	113.168	1.453	-0.391075
138	846	D	13	1	103.3	116.83	131.43	113.176	1.467	-0.176815
138	846	D	13	1	105.5	116.85	131.45	113.191	1.435	-0.667764
138	846	D	13	1	107.9	116.88	131.48	113.215	1.489	0.158912
138	846	D	13	1	110.2	116.9	131.5	113.231	1.412	-1.02164
138	846	D	13	1	112.5	116.92	131.52	113.247	1.418	-0.930259
138	846	D	13	1	114.9	116.95	131.55	113.271	1.424	-0.839159
138	846	D	13	1	117.2	116.97	131.57	113.287	1.454	-0.379989
138	846	D	13	1	119.5	116.99	131.59	113.303	1.441	-0.579773
138	846	D	13	1	121.9	117.02	131.62	113.327	1.396	-1.27022
138	846	D	13	1	124.2	117.04	131.64	113.344	1.391	-1.34741
138	846	D	13	1	126.6	117.07	131.67	113.368	1.363	-1.77735
138	846	D	13	1	128.9	117.09	131.69	113.384	1.37	-1.67064
138	846	D	13	1	131.2	117.11	131.71	113.4	1.364	-1.76315
138	846	D	13	1	133.6	117.14	131.74	113.424	1.347	-2.02452
138	846	D	13	1	135.9	117.16	131.76	113.441	1.309	-2.60741
138	846	D	13	1	138.2	117.18	131.78	113.457	1.358	-1.85708
138	846	D	13	1	140.6	117.21	131.81	113.481	1.339	-2.14909
138	846	D	13	1	142.9	117.23	131.83	113.498	1.298	-2.77796
138	846	D	13	2	3	117.33	131.93	113.579	1.4	-1.21768
138	846	D	13	2	4.8	117.35	131.95	113.596	1.409	-1.08033
138	846	D	13	2	7	117.37	131.97	113.612	1.328	-2.32218
138	846	D	13	2	9.4	117.39	131.99	113.628	1.352	-1.95496
138	846	D	13	2	11.6	117.42	132.02	113.653	1.388	-1.40412
138	846	D	13	2	13.1	117.43	132.03	113.661	1.354	-1.92544
138	846	D	13	2	15.5	117.45	132.05	113.678	1.337	-2.18652
138	846	D	13	2	17.7	117.48	132.08	113.702	1.421	-0.900108
138	846	D	13	2	20.2	117.5	132.1	113.719	1.35	-1.98871
138	846	D	13	2	22.4	117.52	132.12	113.735	1.343	-2.09655
138	846	D	13	2	23.4	117.53	132.13	113.743	1.358	-1.86697
138	846	D	13	2	25.9	117.56	132.16	113.768	1.381	-1.51535
138	846	D	13	2	28.1	117.58	132.18	113.784	1.349	-2.0063
138	846	D	13	2	30.6	117.61	132.21	113.809	1.357	-1.88455
138	846	D	13	2	33	117.63	132.23	113.825	1.374	-1.6246
138	846	D	13	2	34.4	117.64	132.24	113.834	1.361	-1.8241
138	846	D	13	2	36.6	117.67	132.27	113.858	1.396	-1.28859
138	846	D	13	2	39	117.69	132.29	113.875	1.387	-1.42708
138	846	D	13	2	41.5	117.71	132.31	113.891	1.322	-2.42373
138	846	D	13	2	43	117.73	132.33	113.907	1.36	-1.84197
138	846	D	13	2	45.1	117.75	132.35	113.924	1.364	-1.78123
138	846	D	13	2	47.6	117.78	132.38	113.948	1.371	-1.67481
138	846	D	13	2	49.8	117.8	132.4	113.965	1.351	-1.98187
138	846	D	13	2	52.3	117.82	132.42	113.981	1.416	-0.986337
138	846	D	13	2	53	117.83	132.43	113.989	1.387	-1.43103
138	846	D	13	2	53.7	117.84	132.44	113.998	1.361	-1.82975
138	846	D	13	2	55.9	117.86	132.46	114.014	1.377	-1.58512
138	846	D	13	2	60.6	117.91	132.51	114.055	1.401	-1.21875
138	846	D	13	2	63	117.93	132.53	114.071	1.384	-1.47983
138	846	D	13	2	64.3	117.94	132.54	114.08	1.377	-1.58738
138	846	D	13	2	66.7	117.97	132.57	114.104	1.449	-0.484867
138	846	D	13	2	69	117.99	132.59	114.121	1.386	-1.45088
138	846	D	13	2	71.3	118.01	132.61	114.137	1.413	-1.03768
138	846	D	13	2	73	118.03	132.63	114.153	1.412	-1.05357
138	846	D	13	2	75.1	118.05	132.65	114.17	1.427	-0.824266
138	846	D	13	2	77.4	118.07	132.67	114.186	1.476	-0.0739301
138	846	D	13	2	79.7	118.1	132.7	114.211	1.378	-1.57658
138	846	D	13	2	82.1	118.12	132.72	114.227	1.434	-0.718973
138	846	D	13	2	83.5	118.13	132.73	114.235	1.408	-1.11769
138	846	D	13	2	85.9	118.16	132.76	114.26	1.466	-0.229718
138	846	D	13	2	88.2	118.18	132.78	114.276	1.414	-1.02716
138	846	D	13	2	90.5	118.2	132.8	114.293	1.423	-0.889803
138	846	D	13	2	93	118.23	132.83	114.319	1.413	-1.0439
138	846	D	13	2	94.1	118.24	132.84	114.328	1.371	-1.68781
138	846	D	13	2	96.5	118.26	132.86	114.345	1.398	-1.27461
138	846	D	13	2	98.8	118.29	132.89	114.37	1.379	-1.56662
138	846	D	13	2	101.1	118.31	132.91	114.388	1.413	-1.04616
138	846	D	13	2	103	118.33	132.93	114.405	1.413	-1.04672
138	846	D	13	2	104.9	118.35	132.95	114.422	1.438	-0.664173
138	846	D	13	2	107.2	118.37	132.97	114.439	1.393	-1.35434
138	846	D	13	2	109.5	118.39	132.99	114.456	1.471	-0.159594
138	846	D	13	2	111.9	118.42	133.02	114.482	1.472	-0.145117
138	846	D	13	2	114.2	118.44	133.04	114.499	1.4	-1.24905
138	846	D	13	2	116.5	118.46	133.06	114.517	1.364	-1.8013
138	846	D	13	2	118.9	118.49	133.09	114.542	1.425	-0.867347
138	846	D	13	2	121.2	118.51	133.11	114.559	1.428	-0.821939
138	846	D	13	2	123.5	118.53	133.13	114.577	1.411	-1.08302
138	846	D	13	2	125.9	118.56	133.16	114.602	1.433	-0.746729
138	846	D	13	2	128.2	118.58	133.18	114.62	1.453	-0.440804
138	846	D	13	2	130.6	118.61	133.21	114.645	1.43	-0.794115
138	846	D	13	2	132.9	118.63	133.23	114.663	1.408	-1.13182
138	846	D	13	2	135.2	118.65	133.25	114.681	1.483	0.0169537
138	846	D	13	2	137.6	118.68	133.28	114.708	1.481	-0.014543
138	846	D	13	2	139.9	118.7	133.3	114.726	1.464	-0.275625
138	846	D	13	2	142.3	118.72	133.32	114.744	1.537	0.8425
138	846	D	13	3	3	118.83	133.43	114.843	1.526	0.670822
138	846	D	13	3	4.9	118.85	133.45	114.861	1.503	0.317793
138	846	D	13	3	7	118.87	133.47	114.879	1.489	0.102685
138	846	D	13	3	9.5	118.89	133.49	114.897	1.498	0.24004
138	846	C	13	1	54.6	117.05	133.55	114.934	1.441	-0.59089
138	846	C	13	1	57	117.07	133.57	114.954	1.451	-0.429343
138	846	C	13	1	59.3	117.09	133.59	114.973	1.443	-0.55954
138	846	C	13	1	61.7	117.12	133.62	115.002	1.477	-0.00927741
138	846	C	13	1	64	117.14	133.64	115.022	1.51	0.52505
138	846	C	13	1	66.3	117.16	133.66	115.042	1.461	-0.269665
138	846	C	13	1	68.6	117.19	133.69	115.071	1.454	-0.383926
138	846	C	13	1	70.9	117.21	133.71	115.091	1.457	-0.335829
138	846	C	13	1	73.3	117.23	133.73	115.109	1.462	-0.255336
138	846	C	13	1	75.6	117.26	133.76	115.138	1.385	-1.50408
138	846	C	13	1	77.9	117.28	133.78	115.158	1.478	0.00265964
138	846	C	13	1	80.3	117.3	133.8	115.178	1.373	-1.6997
138	846	C	13	1	82.6	117.33	133.83	115.207	1.513	0.568599
138	846	C	13	1	84.9	117.35	133.85	115.227	1.447	-0.50165
138	846	C	13	1	87.3	117.37	133.87	115.246	1.431	-0.761509
138	846	C	13	1	89.6	117.4	133.9	115.274	1.385	-1.50782
138	846	C	13	1	91.9	117.42	133.92	115.293	1.41	-1.10321
138	846	C	13	1	94.3	117.44	133.94	115.312	1.413	-1.05511
138	846	C	13	1	96.6	117.47	133.97	115.34	1.393	-1.3801
138	846	C	13	1	98.9	117.49	133.99	115.359	1.33	-2.40172
138	846	C	13	1	101.3	117.51	134.01	115.378	1.425	-0.862487
138	846	C	13	1	103.6	117.54	134.04	115.406	1.34	-2.24098
138	846	C	13	1	105.9	117.56	134.06	115.425	1.393	-1.38247
138	846	C	13	1	108.3	117.58	134.08	115.444	1.402	-1.23714
138	846	C	13	1	110.6	117.61	134.11	115.472	1.431	-0.767913
138	846	C	13	1	112.9	117.63	134.13	115.491	1.393	-1.38433
138	846	C	13	1	115.3	117.65	134.15	115.509	1.437	-0.671733
138	846	C	13	1	117.6	117.68	134.18	115.537	1.438	-0.656332
138	846	C	13	1	120	117.7	134.2	115.557	1.427	-0.835149
138	846	C	13	1	122.3	117.72	134.22	115.576	1.376	-1.66232
138	846	C	13	1	124.6	117.75	134.25	115.604	1.397	-1.32266
138	846	C	13	1	127	117.77	134.27	115.623	1.348	-2.11737
138	846	C	13	1	129.3	117.79	134.29	115.641	1.41	-1.11307
138	846	C	13	1	131.6	117.82	134.32	115.67	1.494	0.247573
138	846	C	13	1	134	117.84	134.34	115.688	1.393	-1.38994
138	846	C	13	1	136.3	117.86	134.36	115.708	1.472	-0.110068
138	846	C	13	1	138.7	117.89	134.39	115.736	1.476	-0.0460382
138	846	C	13	1	141	117.91	134.41	115.755	1.498	0.309999
138	846	C	13	1	143.3	117.93	134.43	115.773	1.489	0.163591
138	846	C	13	2	2.8	118.03	134.53	115.867	1.51	0.501289
138	846	C	13	2	5.6	118.06	134.56	115.894	1.425	-0.877165
138	846	C	13	2	7.9	118.08	134.58	115.913	1.496	0.273042
138	846	C	13	2	12.6	118.13	134.63	115.959	1.487	0.125836
138	846	C	13	2	15	118.15	134.65	115.977	1.492	0.206342
138	846	C	13	2	17.3	118.17	134.67	115.996	1.518	0.627212
138	846	C	13	2	19.7	118.2	134.7	116.024	1.462	-0.281216
138	846	C	13	2	21.9	118.22	134.72	116.043	1.483	0.0586081
138	846	C	13	2	24.3	118.24	134.74	116.062	1.426	-0.865764
138	846	C	13	2	26.5	118.26	134.76	116.08	1.455	-0.396274
138	846	C	13	2	29	118.29	134.79	116.107	1.439	-0.656406
138	846	C	13	2	31.2	118.31	134.81	116.126	1.4115	-1.10265
138	846	C	13	2	35.9	118.36	134.86	116.172	1.433	-0.755515
138	846	C	13	2	38.2	118.38	134.88	116.191	1.385	-1.53398
138	846	C	13	2	40.5	118.4	134.9	116.209	1.417	-1.01591
138	846	C	13	2	42.9	118.43	134.93	116.235	1.424	-0.903257
138	846	C	13	2	45.2	118.45	134.95	116.253	1.42	-0.968623
138	846	C	13	2	47.5	118.47	134.97	116.271	1.431	-0.790865
138	846	C	13	2	49.9	118.5	135	116.297	1.445	-0.564761
138	846	C	13	2	52.2	118.52	135.02	116.315	1.373	-1.73223
138	846	C	13	2	54.5	118.54	135.04	116.332	1.383	-1.57074
138	846	C	13	2	56.9	118.57	135.07	116.358	1.463	-0.274886
138	846	C	13	2	59.2	118.59	135.09	116.375	1.431	-0.794067
138	846	C	13	2	61.5	118.61	135.11	116.392	1.457	-0.373197
138	846	C	13	2	63.9	118.64	135.14	116.417	1.411	-1.11957
138	846	C	13	2	66.2	118.66	135.16	116.434	1.43	-0.812147
138	846	C	13	2	68.5	118.68	135.18	116.451	1.426	-0.877514
138	846	C	13	2	70.9	118.71	135.21	116.476	1.401	-1.28353
138	846	C	13	2	73.2	118.73	135.23	116.493	1.424	-0.911256
138	846	C	13	2	75.5	118.75	135.25	116.51	1.452	-0.457977
138	846	C	13	2	77.8	118.78	135.28	116.536	1.469	-0.183253
138	846	C	13	2	80.2	118.8	135.3	116.552	1.46	-0.329649
138	846	C	13	2	82.6	118.83	135.33	116.578	1.435	-0.735641
138	846	C	13	2	84.8	118.85	135.35	116.595	1.475	-0.0878698
138	846	C	13	2	87.2	118.87	135.37	116.611	1.448	-0.52601
138	846	C	13	2	89.5	118.89	135.39	116.628	1.483	0.0407251
138	846	C	13	2	91.8	118.92	135.42	116.653	1.533	0.850313
138	846	C	13	2	94.2	118.94	135.44	116.669	1.462	-0.300978
138	846	C	13	2	96.5	118.96	135.46	116.686	1.515	0.557509
138	846	C	13	2	98.9	118.99	135.49	116.712	1.534	0.864655
138	846	C	13	2	101.2	119.01	135.51	116.728	1.524	0.702036
138	846	C	13	2	103.5	119.03	135.53	116.745	1.447	-0.546495
138	846	C	13	2	105.8	119.06	135.56	116.77	1.472	-0.142097
138	846	C	13	2	108.2	119.08	135.58	116.786	1.447	-0.547828
138	846	C	13	2	110.5	119.1	135.6	116.803	1.498	0.278238
138	846	C	13	2	112.9	119.13	135.63	116.827	1.509	0.455722
138	846	C	13	2	115.2	119.15	135.65	116.843	1.505	0.390355
138	846	C	13	2	117.5	119.17	135.67	116.86	1.498	0.276369
138	846	C	13	2	119.9	119.2	135.7	116.885	1.477	-0.0647958
138	846	C	13	2	122.2	119.22	135.72	116.902	1.423	-0.94055
138	846	C	13	2	124.5	119.24	135.74	116.918	1.39	-1.47592
138	846	C	13	2	126.9	119.27	135.77	116.942	1.453	-0.455647
138	846	C	13	2	129.2	119.29	135.79	116.959	1.397	-1.36378
138	846	C	13	2	131.5	119.31	135.81	116.975	1.477	-0.0677327
138	846	C	13	2	133.9	119.34	135.84	116.999	1.438	-0.70064
138	846	C	13	2	136.2	119.36	135.86	117.016	1.498	0.271297
138	846	C	13	2	138.6	119.39	135.89	117.04	1.473	-0.134695
138	846	C	13	2	140.9	119.41	135.91	117.055	1.445	-0.589046
138	846	C	13	2	143.2	119.43	135.93	117.071	1.468	-0.216809
138	846	C	13	3	3	119.53	136.03	117.151	1.39	-1.48364
138	846	C	13	3	8	119.58	136.08	117.189	1.415	-1.07982
138	846	C	13	3	10.4	119.6	136.1	117.205	1.466	-0.253753
138	846	C	13	3	12.7	119.63	136.13	117.228	1.405	-1.24323
138	846	C	13	3	15	119.65	136.15	117.243	1.441	-0.660282
138	846	C	13	3	17.3	119.67	136.17	117.258	1.39	-1.48738
138	846	C	13	3	19.8	119.7	136.2	117.28	1.351	-2.12036
138	846	C	13	3	22	119.72	136.22	117.295	1.422	-0.970106
138	846	C	13	3	24.3	119.74	136.24	117.31	1.374	-1.74855
138	846	C	13	3	26.7	119.77	136.27	117.332	1.385	-1.57111
138	846	C	13	3	29	119.79	136.29	117.346	1.431	-0.826103
138	846	C	13	3	31.4	119.81	136.31	117.36	1.438	-0.713175
138	846	C	13	3	33.7	119.84	136.34	117.382	1.43	-0.843647
138	846	C	13	3	36	119.86	136.36	117.396	1.381	-1.6384
138	846	C	13	3	38.4	119.88	136.38	117.411	1.377	-1.70369
138	846	C	13	3	40.7	119.91	136.41	117.433	1.449	-0.537561
138	846	C	13	3	43	119.93	136.43	117.448	1.408	-1.20261
138	846	C	13	3	45.4	119.95	136.45	117.462	1.431	-0.830377
138	846	C	13	3	47.7	119.98	136.48	117.484	1.435	-0.766343
138	846	C	13	3	50	120	136.5	117.5	1.439	-0.702048
138	846	C	13	3	52.4	120.02	136.52	117.514	1.487	0.0753945
138	846	C	13	3	54.7	120.05	136.55	117.538	1.47	-0.200934
138	846	C	13	3	57	120.07	136.57	117.554	1.397	-1.38458
138	846	C	13	3	59.4	120.09	136.59	117.569	1.452	-0.49375
138	846	C	13	3	61.7	120.12	136.62	117.593	1.391	-1.48327
138	846	C	13	3	64	120.14	136.64	117.61	1.372	-1.79166
138	846	C	13	3	66.4	120.16	136.66	117.625	1.456	-0.430789
138	846	C	13	3	68.7	120.19	136.69	117.65	1.501	0.297763
138	846	C	13	3	71	120.21	136.71	117.667	1.441	-0.675234
138	846	C	13	3	73.3	120.23	136.73	117.683	1.507	0.393944
138	846	C	13	3	75.7	120.26	136.76	117.708	1.442	-0.660356
138	846	C	13	3	78	120.28	136.78	117.724	1.473	-0.158457
138	846	C	13	3	80.3	120.3	136.8	117.741	1.453	-0.483147
138	846	C	13	3	82.7	120.33	136.83	117.765	1.495	0.196785
138	846	C	13	3	85	120.35	136.85	117.782	1.444	-0.630352
138	846	C	13	3	87.3	120.37	136.87	117.799	1.437	-0.744339
138	846	C	13	3	89.7	120.4	136.9	117.824	1.504	0.340788
138	846	C	13	3	92	120.42	136.92	117.841	1.479	-0.0649441
138	846	C	13	3	94.4	120.44	136.94	117.858	1.523	0.647659
138	846	C	13	3	96.7	120.47	136.97	117.884	1.449	-0.552513
138	846	C	13	3	99	120.49	136.99	117.9	1.484	0.0142259
138	846	C	13	3	101.4	120.51	137.01	117.917	1.485	0.0298996
138	846	C	13	3	103.7	120.54	137.04	117.943	1.451	-0.52196
138	846	C	13	3	106	120.56	137.06	117.959	1.448	-0.571116
138	846	C	13	3	108.3	120.58	137.08	117.977	1.498	0.238726
138	846	C	13	3	110.7	120.61	137.11	118.006	1.514	0.497252
138	846	C	13	3	113	120.63	137.13	118.025	1.47	-0.216422
138	846	C	13	3	115.4	120.65	137.15	118.045	1.531	0.771714
138	846	C	13	3	117.7	120.68	137.18	118.074	1.529	0.738507
138	846	C	13	3	120	120.7	137.2	118.093	1.525	0.673141
138	846	C	13	3	122.4	120.72	137.22	118.113	1.465	-0.299856
138	846	C	13	3	124.7	120.75	137.25	118.142	1.538	0.88251
138	846	C	13	3	127	120.77	137.27	118.161	1.503	0.314696
138	846	C	13	3	129.4	120.79	137.29	118.181	1.521	0.605905
138	846	C	13	3	131.7	120.82	137.32	118.211	1.474	-0.156663
138	846	C	13	3	134.1	120.84	137.34	118.23	1.524	0.653192
138	846	C	13	3	136.4	120.86	137.36	118.249	1.444	-0.643959
138	846	C	13	3	138.7	120.89	137.39	118.279	1.501	0.279085
138	846	C	13	3	141	120.91	137.41	118.299	1.422	-1.00187
138	846	C	13	3	143.4	120.93	137.43	118.318	1.515	0.504927
138	846	C	13	4	2.8	121.03	137.53	118.415	1.516	0.518459
138	846	C	13	4	5.6	121.06	137.56	118.444	1.512	0.452831
138	846	C	13	4	7.8	121.08	137.58	118.464	1.474	-0.163603
138	846	C	13	4	10.3	121.1	137.6	118.483	1.554	1.13249
138	846	C	13	4	12.5	121.13	137.63	118.514	1.486	0.0295582
138	846	C	13	4	14.9	121.15	137.65	118.534	1.489	0.0776486
138	846	C	13	4	17.3	121.17	137.67	118.554	1.479	-0.084964
138	846	C	13	4	19.7	121.2	137.7	118.586	1.464	-0.328876
138	846	C	13	4	21.8	121.22	137.72	118.606	1.5	0.254065
138	846	C	13	4	24.3	121.24	137.74	118.626	1.508	0.38319
138	846	C	13	4	26.5	121.26	137.76	118.646	1.558	1.19304
138	846	C	13	4	29	121.29	137.79	118.677	1.53	0.738432
138	846	C	13	4	31.2	121.31	137.81	118.697	1.541	0.916178
138	846	C	13	4	33.7	121.34	137.84	118.729	1.54	0.89917
138	846	C	13	4	35.9	121.36	137.86	118.749	1.517	0.52586
138	846	C	13	4	38.3	121.38	137.88	118.769	1.54	0.898111
138	846	C	13	4	40.5	121.4	137.9	118.789	1.526	0.670661
138	846	C	13	4	43	121.43	137.93	118.821	1.504	0.313288
138	846	C	13	4	45.2	121.45	137.95	118.84	1.575	1.46346
138	846	C	13	4	47.7	121.48	137.98	118.872	1.537	0.846812
138	846	C	13	4	49.8	121.5	138	118.892	1.548	1.02456
138	846	C	13	4	52.3	121.52	138.02	118.912	1.611	2.0451
138	846	C	13	4	54.5	121.54	138.04	118.932	1.519	0.553472
138	846	C	13	4	57	121.57	138.07	118.964	1.565	1.29823
138	846	C	13	4	59.2	121.59	138.09	118.983	1.484	-0.0151355
138	846	C	13	4	61.7	121.62	138.12	119.015	1.52	0.56754
138	846	C	13	4	63.9	121.64	138.14	119.035	1.528	0.696666
138	846	C	13	4	66.3	121.66	138.16	119.055	1.517	0.517848
138	846	C	13	4	68.5	121.68	138.18	119.075	1.536	0.825268
138	846	C	13	4	71	121.71	138.21	119.107	1.586	1.63491
138	846	C	13	4	73.2	121.73	138.23	119.126	1.489	0.0621667
138	846	C	13	4	75.6	121.76	138.26	119.157	1.532	0.758294
138	846	C	13	4	77.8	121.78	138.28	119.177	1.491	0.0932476
138	846	C	13	4	80.3	121.8	138.3	119.195	1.557	1.16243
138	846	C	13	4	82.5	121.82	138.32	119.212	1.453	-0.523717
138	846	C	13	4	85	121.85	138.35	119.238	1.46	-0.411064
138	846	C	13	4	87.2	121.87	138.37	119.254	1.471	-0.233306
138	846	C	13	4	89.6	121.9	138.4	119.28	1.456	-0.477228
138	846	C	13	4	91.8	121.92	138.42	119.297	1.388	-1.57984
138	846	C	13	4	94.3	121.94	138.44	119.314	1.487	0.0241455
138	846	C	13	4	96.5	121.96	138.46	119.331	1.49	0.0722359
138	846	C	13	4	99	121.99	138.49	119.356	1.42	-1.06311
138	846	C	13	4	101.2	122.01	138.51	119.373	1.471	-0.237044
138	846	C	13	4	103.5	122.03	138.53	119.39	1.435	-0.821056
138	846	C	13	4	106	122.06	138.56	119.415	1.46	-0.416671
138	846	C	13	4	108.2	122.08	138.58	119.432	1.493	0.117656
138	846	C	13	4	110.6	122.11	138.61	119.458	1.499	0.214105
138	846	C	13	4	112.8	122.13	138.63	119.474	1.45	-0.580611
138	846	C	13	4	115.3	122.15	138.65	119.491	1.588	1.65547
138	846	C	13	4	117.5	122.17	138.67	119.508	1.543	0.925635
138	846	C	13	4	120	122.2	138.7	119.533	1.585	1.6055
138	846	C	13	4	122.2	122.22	138.72	119.55	1.554	1.1026
138	846	C	13	4	124.7	122.25	138.75	119.576	1.644	2.56046
138	846	C	13	4	126.9	122.27	138.77	119.593	1.534	0.777097
138	846	C	13	4	129.3	122.29	138.79	119.611	1.587	1.63553
138	846	C	13	4	131.5	122.31	138.81	119.629	1.601	1.86194
138	846	C	13	4	134	122.34	138.84	119.656	1.605	1.92598
138	846	C	13	4	136.2	122.36	138.86	119.674	1.557	1.14748
138	846	C	13	4	138.7	122.39	138.89	119.701	1.574	1.42221
138	846	C	13	4	140.9	122.41	138.91	119.719	1.597	1.7944
138	846	C	13	4	143.4	122.43	138.93	119.737	1.538	0.837666
138	846	C	13	4	145.6	122.46	138.96	119.764	1.588	1.64725
138	846	C	13	5	2.8	122.53	139.03	119.827	1.567	1.30496
138	846	C	13	5	5.6	122.56	139.06	119.854	1.527	0.655908
138	846	C	13	5	8.1	122.58	139.08	119.872	1.564	1.25512
138	846	C	13	5	10.3	122.6	139.1	119.89	1.533	0.752089
138	846	C	13	5	12.7	122.63	139.13	119.917	1.537	0.816122
138	846	C	13	5	14.8	122.65	139.15	119.935	1.518	0.507631
138	846	C	13	5	17.5	122.67	139.17	119.952	1.54	0.86367
138	846	C	13	5	19.6	122.7	139.2	119.978	1.46	-0.433754
138	846	C	13	5	22	122.72	139.22	119.996	1.567	1.29998
138	846	C	13	5	24.2	122.74	139.24	120.014	1.584	1.57498
138	846	C	13	5	26.7	122.77	139.27	120.04	1.5785	1.48501
138	846	C	13	5	31.2	122.81	139.31	120.076	1.583	1.55691
138	846	C	13	5	33.6	122.84	139.34	120.102	1.569	1.32914
138	846	C	13	5	35.9	122.86	139.36	120.12	1.549	1.00447
138	846	C	13	5	38.2	122.88	139.38	120.138	1.622	2.18715
138	846	C	13	5	40.5	122.9	139.4	120.156	1.579	1.48962
138	846	C	13	5	42.9	122.93	139.43	120.186	1.515	0.451535
138	846	C	13	5	45.2	122.95	139.45	120.206	1.485	-0.0352276
138	846	C	13	5	47.6	122.98	139.48	120.235	1.56	1.17955
138	846	C	13	5	49.9	123	139.5	120.255	1.542	0.887283
138	846	C	13	5	52.2	123.02	139.52	120.276	1.511	0.384299
138	846	C	13	5	54.5	123.04	139.54	120.296	1.561	1.19415
138	846	C	13	5	56.9	123.07	139.57	120.326	1.553	1.06369
138	846	C	13	5	59.2	123.09	139.59	120.347	1.564	1.24145
138	846	C	13	5	61.6	123.12	139.62	120.376	1.499	0.187141
138	846	C	13	5	63.9	123.14	139.64	120.396	1.559	1.15908
138	846	C	13	5	66.2	123.16	139.66	120.418	1.475	-0.202915
138	846	C	13	5	68.5	123.18	139.68	120.438	1.48	-0.122406
138	846	C	13	5	70.9	123.21	139.71	120.468	1.505	0.281988
138	846	C	13	5	73.2	123.23	139.73	120.489	1.468	-0.318235
138	846	C	13	5	75.5	123.25	139.75	120.509	1.504	0.264706
138	846	C	13	5	77.9	123.28	139.78	120.538	1.466	-0.35199
138	846	C	13	5	80.2	123.3	139.8	120.558	1.473	-0.239063
138	846	C	13	5	82.5	123.32	139.82	120.577	1.462	-0.41788
138	846	C	13	5	84.9	123.35	139.85	120.607	1.516	0.456531
138	846	C	13	5	87.2	123.37	139.87	120.626	1.443	-0.727168
138	846	C	13	5	89.5	123.39	139.89	120.646	1.534	0.747204
138	846	C	13	5	91.9	123.42	139.92	120.675	1.528	0.649155
138	846	C	13	5	94.2	123.44	139.94	120.695	1.505	0.275845
138	846	C	13	5	96.5	123.46	139.96	120.713	1.56	1.16674
138	846	C	13	5	98.9	123.49	139.99	120.741	1.502	0.225892
138	846	C	13	5	101.2	123.51	140.01	120.759	1.548	0.970916
138	846	C	13	5	103.6	123.54	140.04	120.786	1.524	0.581122
138	846	C	13	5	105.9	123.56	140.06	120.804	1.567	1.27755
138	846	C	13	5	108.2	123.58	140.08	120.822	1.591	1.66594
138	846	C	13	5	110.5	123.6	140.1	120.841	1.561	1.17921
138	846	C	13	5	112.9	123.63	140.13	120.867	1.554	1.06495
138	846	C	13	5	115.2	123.65	140.15	120.885	1.541	0.853727
138	846	C	13	5	117.5	123.67	140.17	120.903	1.574	1.38807
138	846	C	13	5	119.9	123.7	140.2	120.931	1.544	0.901014
138	846	C	13	5	122.2	123.72	140.22	120.949	1.599	1.79191
138	846	C	13	5	124.6	123.75	140.25	120.975	1.616	2.06666
138	846	C	13	5	126.9	123.77	140.27	120.993	1.575	1.40153
138	846	C	13	5	129.3	123.79	140.29	121.01	1.576	1.41723
138	846	C	13	5	131.6	123.82	140.32	121.035	1.544	0.897812
138	846	C	13	5	133.9	123.84	140.34	121.052	1.55	0.994516
138	846	C	13	5	136.2	123.86	140.36	121.07	1.545	0.912951
138	846	C	13	5	138.6	123.89	140.39	121.096	1.564	1.2201
138	846	C	13	5	140.9	123.91	140.41	121.113	1.513	0.392959
[truncated: 1,669 more rows]
