# Supplementary material for: A Revised Mid-Pliocene Composite Section for ODP Site 846
Source: Copernicus journal article supplement (doi:10.5194/cp-2019-133), 2020-02-21
Supplement: Supplementary file 5 [file Table S4 846D grape composite.xls]

## Sheet: Sheet1
TABLE S4: 846D COMPOSITE GRAPE
Leg	Site	Hole	core	section	cm	mbsf	shipboard mcd	log depth	WBD (g/cc)	WBD detrended and normalized
138	846	D	9	4	111.7	83.42	93.82	79.9623	1.391	-0.278812
138	846	D	9	4	114	83.44	93.84	79.9809	1.353	-0.861709
138	846	D	9	4	116.3	83.46	93.86	79.9994	1.38	-0.448512
138	846	D	9	4	118.7	83.49	93.89	80.0273	1.322	-1.33818
138	846	D	9	4	121	83.51	93.91	80.0459	1.389	-0.312004
138	846	D	9	4	123.3	83.53	93.93	80.0645	1.421	0.177815
138	846	D	9	4	125.7	83.56	93.96	80.0924	1.411	0.0237227
138	846	D	9	4	128	83.58	93.98	80.111	1.341	-1.04956
138	846	D	9	4	130.4	83.6	94	80.1295	1.389	-0.314547
138	846	D	9	4	132.7	83.63	94.03	80.1574	1.395	-0.223447
138	846	D	9	4	135	83.65	94.05	80.1762	1.366	-0.668423
138	846	D	9	4	137.4	83.67	94.07	80.1949	1.366	-0.668989
138	846	D	9	4	139.7	83.7	94.1	80.2231	1.42	0.157688
138	846	D	9	4	142	83.72	94.12	80.2419	1.398	-0.180017
138	846	D	9	4	144.4	83.74	94.14	80.2606	1.353	-0.870185
138	846	D	9	5	3	83.83	94.23	80.3451	1.38	-0.458966
138	846	D	9	5	4.8	83.85	94.25	80.3632	1.355	-0.842644
138	846	D	9	5	7	83.87	94.27	80.3812	1.39	-0.306851
138	846	D	9	5	8	83.88	94.28	80.3903	1.388	-0.337783
138	846	D	9	5	8.6	83.89	94.29	80.3993	1.426	0.244266
138	846	D	9	5	10.8	83.91	94.31	80.4174	1.421	0.167079
138	846	D	9	5	13	83.93	94.33	80.4355	1.41	-0.00205616
138	846	D	9	5	14.7	83.95	94.35	80.4515	1.418	0.119975
138	846	D	9	5	16.9	83.97	94.37	80.4675	1.386	-0.370975
138	846	D	9	5	18.4	83.98	94.38	80.4755	1.43	0.303021
138	846	D	9	5	20.8	84.01	94.41	80.4995	1.438	0.42477
138	846	D	9	5	23	84.03	94.43	80.5155	1.441	0.470178
138	846	D	9	5	24.6	84.05	94.45	80.5315	1.472	0.944673
138	846	D	9	5	27	84.07	94.47	80.5475	1.467	0.867486
138	846	D	9	5	28.4	84.08	94.48	80.5554	1.484	1.12772
138	846	D	9	5	30.9	84.11	94.51	80.5794	1.459	0.743759
138	846	D	9	5	33	84.13	94.53	80.5954	1.473	0.957737
138	846	D	9	5	34.5	84.15	94.55	80.6114	1.471	0.926523
138	846	D	9	5	37	84.17	94.57	80.6274	1.484	1.12518
138	846	D	9	5	38	84.18	94.58	80.6354	1.435	0.373993
138	846	D	9	5	38.5	84.19	94.59	80.6434	1.455	0.680201
138	846	D	9	5	40.6	84.21	94.61	80.6594	1.486	1.1547
138	846	D	9	5	43	84.23	94.63	80.6754	1.472	0.939587
138	846	D	9	5	44.5	84.25	94.65	80.6914	1.405	-0.0877203
138	846	D	9	5	46.7	84.27	94.67	80.7074	1.408	-0.0423119
138	846	D	9	5	48	84.28	94.68	80.7154	1.483	1.10674
138	846	D	9	5	48.5	84.29	94.69	80.7234	1.449	0.585428
138	846	D	9	5	50.6	84.31	94.71	80.7394	1.504	1.42771
138	846	D	9	5	53	84.33	94.73	80.7554	1.46	0.752868
138	846	D	9	5	54.5	84.35	94.75	80.7714	1.442	0.476461
138	846	D	9	5	56.7	84.37	94.77	80.7874	1.471	0.920307
138	846	D	9	5	58.1	84.38	94.78	80.7954	1.517	1.62495
138	846	D	9	5	60.6	84.41	94.81	80.8193	1.533	1.8693
138	846	D	9	5	63	84.43	94.83	80.8353	1.495	1.2864
138	846	D	9	5	64.3	84.44	94.84	80.8433	1.537	1.92975
138	846	D	9	5	66.6	84.47	94.87	80.8673	1.576	2.52656
138	846	D	9	5	68	84.48	94.88	80.8753	1.496	1.30031
138	846	D	9	5	70.5	84.51	94.91	80.8993	1.53	1.8205
138	846	D	9	5	73	84.53	94.93	80.9153	1.532	1.85058
138	846	D	9	5	74.1	84.54	94.94	80.9233	1.498	1.32927
138	846	D	9	5	76.6	84.57	94.97	80.9473	1.53	1.8188
138	846	D	9	5	78	84.58	94.98	80.9553	1.501	1.37411
138	846	D	9	5	80.3	84.6	95	80.9713	1.539	1.95588
138	846	D	9	5	83	84.63	95.03	80.9953	1.485	1.1275
138	846	D	9	5	84.2	84.64	95.04	81.0033	1.52	1.66358
138	846	D	9	5	86.4	84.66	95.06	81.0193	1.459	0.728219
138	846	D	9	5	88	84.68	95.08	81.0353	1.495	1.27934
138	846	D	9	5	90.3	84.7	95.1	81.0513	1.516	1.60059
138	846	D	9	5	93	84.73	95.13	81.0752	1.47	0.894811
138	846	D	9	5	94	84.74	95.14	81.0832	1.433	0.327521
138	846	D	9	5	96.4	84.76	95.16	81.0992	1.473	0.939937
138	846	D	9	5	98	84.78	95.18	81.1152	1.439	0.418338
138	846	D	9	5	100.3	84.8	95.2	81.1312	1.412	0.00401113
138	846	D	9	5	103	84.83	95.23	81.1552	1.416	0.0644615
138	846	D	9	5	104	84.84	95.24	81.1632	1.353	-0.901266
138	846	D	9	5	106.2	84.86	95.26	81.1792	1.331	-1.23897
138	846	D	9	5	108	84.88	95.28	81.1952	1.365	-0.718502
138	846	D	9	5	110.1	84.9	95.3	81.2112	1.327	-1.3014
138	846	D	9	5	112.3	84.92	95.32	81.2272	1.389	-0.351843
138	846	D	9	5	114.8	84.95	95.35	81.2512	1.336	-1.16489
138	846	D	9	5	117	84.97	95.37	81.2672	1.398	-0.215335
138	846	D	9	5	119.5	85	95.4	81.2912	1.325	-1.33487
138	846	D	9	5	121.7	85.02	95.42	81.3072	1.344	-1.04427
138	846	D	9	5	124.1	85.04	95.44	81.3237	1.395	-0.263287
138	846	D	9	5	126.4	85.06	95.46	81.3407	1.363	-0.754236
138	846	D	9	5	128.8	85.09	95.49	81.3662	1.309	-1.58261
138	846	D	9	5	131	85.11	95.51	81.3832	1.291	-1.85901
138	846	D	9	5	133.5	85.14	95.54	81.4089	1.328	-1.29285
138	846	D	9	5	135.7	85.16	95.56	81.4262	1.383	-0.450572
138	846	D	9	5	138.1	85.18	95.58	81.4435	1.328	-1.29399
138	846	D	9	5	140.4	85.2	95.6	81.4608	1.315	-1.49377
138	846	D	9	5	142.7	85.23	95.63	81.4868	1.357	-0.850987
138	846	D	9	5	145.2	85.25	95.65	81.5042	1.341	-1.09674
138	846	D	9	7	3	86.83	97.23	82.7886	1.378	-0.57438
138	846	D	9	7	6.9	86.87	97.27	82.8294	1.337	-1.20382
138	846	D	9	7	8.4	86.88	97.28	82.8397	1.379	-0.560468
138	846	D	9	7	10.7	86.91	97.31	82.8703	1.389	-0.408071
138	846	D	9	7	13	86.93	97.33	82.8908	1.365	-0.776424
138	846	D	9	7	14.4	86.94	97.34	82.901	1.297	-1.81877
138	846	D	9	7	16.8	86.97	97.37	82.9316	1.262	-2.35598
138	846	D	9	7	18.1	86.98	97.38	82.9419	1.343	-1.11498
138	846	D	9	7	20.4	87	97.4	82.9623	1.359	-0.870349
138	846	D	9	7	23	87.03	97.43	82.993	1.365	-0.779249
138	846	D	9	7	24.2	87.04	97.44	83.0032	1.322	-1.43849
138	846	D	9	7	26.6	87.07	97.47	83.0338	1.282	-2.05231
138	846	D	9	7	28.1	87.08	97.48	83.0441	1.343	-1.1178
138	846	D	9	7	30.4	87.1	97.5	83.0645	1.32	-1.47083
138	846	D	9	7	33	87.13	97.53	83.0952	1.325	-1.39506
138	846	D	9	7	34.2	87.14	97.54	83.1054	1.393	-0.353271
138	846	D	9	7	36.6	87.17	97.57	83.136	1.314	-1.56476
138	846	D	9	7	38	87.18	97.58	83.1463	1.329	-1.33517
138	846	D	9	7	40.3	87.2	97.6	83.1667	1.32	-1.47366
138	846	D	9	7	43	87.23	97.63	83.1974	1.316	-1.5358
138	846	D	9	7	44.2	87.24	97.64	83.2076	1.32	-1.47479
138	846	D	9	7	46.5	87.27	97.67	83.2382	1.308	-1.65953
138	846	D	9	7	48.2	87.28	97.68	83.2485	1.322	-1.44527
138	846	D	9	7	50.3	87.3	97.7	83.2689	1.266	-2.30401
138	846	D	9	7	53	87.33	97.73	83.2996	1.303	-1.73785
138	846	D	9	7	54.2	87.34	97.74	83.3098	1.358	-0.89528
138	846	D	9	7	56.5	87.37	97.77	83.3404	1.293	-1.89222
138	846	D	9	7	58.8	87.39	97.79	83.3609	1.282	-2.06136
138	846	D	9	7	61.2	87.41	97.81	83.3813	1.325	-1.40297
138	846	D	9	7	63.5	87.44	97.84	83.412	1.332	-1.29654
138	846	D	9	7	65.8	87.46	97.86	83.4324	1.285	-2.01736
138	846	D	9	7	68.2	87.48	97.88	83.4529	1.322	-1.45092
138	846	D	9	7	70.5	87.51	97.91	83.4835	1.349	-1.038
138	846	D	9	7	72.8	87.53	97.93	83.5039	1.342	-1.14584
138	846	D	9	7	75.2	87.55	97.95	83.5244	1.385	-0.487452
138	846	D	9	7	77.5	87.58	97.98	83.555	1.351	-1.00933
138	846	D	9	7	79.8	87.6	98	83.5755	1.328	-1.36236
138	846	D	9	7	82.2	87.62	98.02	83.5959	1.392	-0.382158
138	846	B	10	2	98	85.48	98.03	83.6061	1.3678	-0.993563
138	846	B	10	2	99.5	85.49	98.04	83.6164	1.394	-0.568104
138	846	D	9	7	84.5	87.65	98.05	83.6266	1.37	-0.720145
138	846	B	10	2	101.8	85.52	98.07	83.647	1.386	-0.699059
138	846	D	9	7	86.8	87.67	98.07	83.647	1.409	-0.123054
138	846	B	10	2	103.3	85.53	98.08	83.6572	1.3922	-0.598995
138	846	D	9	7	89.2	87.69	98.09	83.6675	1.448	0.474037
138	846	B	10	2	105.5	85.56	98.11	83.6879	1.375	-0.879077
138	846	B	10	2	108	85.58	98.13	83.7083	1.3907	-0.624716
138	846	B	10	2	109.3	85.59	98.14	83.7186	1.428	-0.0175815
138	846	B	10	2	111.7	85.62	98.17	83.7492	1.41	-0.311231
138	846	B	10	2	114	85.64	98.19	83.7697	1.47	0.664418
138	846	B	10	2	116.4	85.66	98.21	83.7901	1.411	-0.296012
138	846	B	10	2	118.7	85.69	98.24	83.8208	1.446	0.272632
138	846	B	10	2	121	85.71	98.26	83.8412	1.456	0.434796
138	846	B	10	2	123.4	85.73	98.28	83.8616	1.528	1.60572
138	846	B	10	2	125.7	85.76	98.31	83.8923	1.444	0.238248
138	846	B	10	2	128	85.78	98.33	83.9127	1.447	0.286527
138	846	B	10	2	130.4	85.8	98.35	83.9332	1.487	0.93678
138	846	B	10	2	132.7	85.83	98.38	83.9638	1.442	0.203864
138	846	B	10	2	135	85.85	98.4	83.9843	1.408	-0.34983
138	846	B	10	2	137.4	85.87	98.42	84.0047	1.476	0.755977
138	846	B	10	2	139.7	85.9	98.45	84.0354	1.455	0.413524
138	846	B	10	2	142.1	85.92	98.47	84.0558	1.429	-0.0100186
138	846	B	10	2	144.4	85.94	98.49	84.0763	1.427	-0.0430851
138	846	B	10	3	3	86.03	98.58	84.1682	1.4963	1.08256
138	846	B	10	3	4.9	86.05	98.6	84.1887	1.436	0.10044
138	846	B	10	3	7.1	86.07	98.62	84.2091	1.442	0.197529
138	846	B	10	3	8.1	86.08	98.63	84.2193	1.4463	0.267767
138	846	B	10	3	10.4	86.1	98.65	84.2398	1.434	0.0665815
138	846	B	10	3	13	86.13	98.68	84.2704	1.463	0.537605
138	846	B	10	3	14	86.14	98.69	84.2807	1.458	0.455995
138	846	B	10	3	16.4	86.16	98.71	84.3011	1.445	0.243958
138	846	D	10	1	13	87.43	98.73	84.3058	1.44	0.333358
138	846	D	10	1	14.2	87.44	98.74	84.3152	1.424	0.0878831
138	846	B	10	3	18	86.18	98.73	84.3203	1.4548	0.403415
138	846	B	10	3	20.2	86.2	98.75	84.339	1.464	0.552027
138	846	D	10	1	16.6	87.47	98.77	84.3434	1.494	1.15975
138	846	D	10	1	18	87.48	98.78	84.3527	1.445	0.408568
138	846	B	10	3	22.4	86.22	98.77	84.3578	1.439	0.144765
138	846	B	10	3	23	86.23	98.78	84.3672	1.4522	0.359253
138	846	D	10	1	20.4	87.5	98.8	84.3715	1.475	0.867738
138	846	D	10	1	23	87.53	98.83	84.3997	1.449	0.468453
138	846	D	10	1	24	87.54	98.84	84.409	1.44	0.33025
138	846	D	10	1	26.3	87.56	98.86	84.4278	1.372	-0.712382
138	846	D	10	1	28	87.58	98.88	84.4466	1.444	0.390418
138	846	D	10	1	29.7	87.6	98.9	84.4653	1.456	0.573747
138	846	D	10	1	32	87.62	98.92	84.4841	1.49	1.09422
138	846	D	10	1	33.5	87.63	98.93	84.4935	1.442	0.358356
138	846	D	10	1	35.9	87.66	98.96	84.5216	1.461	0.648674
138	846	D	10	1	38	87.68	98.98	84.5404	1.439	0.31097
138	846	D	10	1	39.7	87.7	99	84.5592	1.437	0.279755
138	846	D	10	1	42	87.72	99.02	84.5779	1.383	-0.548333
138	846	D	10	1	43	87.73	99.03	84.5873	1.426	0.110338
138	846	D	10	1	43.5	87.74	99.04	84.5967	1.481	0.952904
138	846	D	10	1	45.8	87.76	99.06	84.6155	1.378	-0.626086
138	846	D	10	1	48	87.78	99.08	84.6343	1.436	0.262171
138	846	D	10	1	49.6	87.8	99.1	84.653	1.413	-0.0908584
138	846	D	10	1	52	87.82	99.12	84.6718	1.437	0.276365
138	846	D	10	1	53.5	87.83	99.13	84.6812	1.424	0.0768636
138	846	D	10	1	55.8	87.86	99.16	84.7093	1.448	0.443804
138	846	D	10	1	58	87.88	99.18	84.7281	1.44	0.320643
138	846	D	10	1	59.6	87.9	99.2	84.7469	1.448	0.442674
138	846	D	10	1	62	87.92	99.22	84.7656	1.438	0.288864
138	846	D	10	1	63.5	87.93	99.23	84.775	1.42	0.0127401
138	846	D	10	1	65.8	87.96	99.26	84.8032	1.458	0.594224
138	846	D	10	1	68	87.98	99.28	84.8219	1.417	-0.0346462
138	846	D	10	1	69.5	87.99	99.29	84.8313	1.373	-0.709207
138	846	D	10	1	71.8	88.02	99.32	84.8595	1.396	-0.357591
138	846	D	10	1	73.2	88.03	99.33	84.8688	1.409	-0.158655
138	846	D	10	1	75.5	88.06	99.36	84.8969	1.451	0.484127
138	846	D	10	1	78	88.08	99.38	84.9157	1.418	-0.0221472
138	846	D	10	1	79.4	88.09	99.39	84.9251	1.388	-0.482165
138	846	D	10	1	81.7	88.12	99.42	84.9532	1.415	-0.0692509
138	846	D	10	1	83.1	88.13	99.43	84.9625	1.42	0.00708912
138	846	D	10	1	85.4	88.15	99.45	84.9799	1.453	0.512233
138	846	D	10	1	88	88.18	99.48	85.0059	1.451	0.480736
138	846	D	10	1	89.2	88.19	99.49	85.0146	1.432	0.189288
138	846	D	10	1	91.5	88.21	99.51	85.0319	1.446	0.403266
138	846	D	10	1	93	88.23	99.53	85.0493	1.449	0.448675
138	846	D	10	1	95.3	88.25	99.55	85.0666	1.418	-0.0269505
138	846	D	10	1	98	88.28	99.58	85.0926	1.451	0.477911
138	846	D	10	1	99.2	88.29	99.59	85.1012	1.426	0.0945154
138	846	D	10	1	101.5	88.31	99.61	85.1186	1.407	-0.197215
138	846	D	10	1	103	88.33	99.63	85.1359	1.432	0.185332
138	846	D	10	1	105.3	88.35	99.65	85.1523	1.357	-0.964571
138	846	D	10	1	108	88.38	99.68	85.177	1.429	0.137946
138	846	D	10	1	109.1	88.39	99.69	85.1852	1.343	-1.18024
138	846	D	10	1	111.4	88.41	99.71	85.2016	1.438	0.275019
138	846	D	10	1	113.7	88.44	99.74	85.226	1.359	-0.936465
138	846	D	10	1	116.1	88.46	99.76	85.242	1.407	-0.201454
138	846	D	10	1	118.4	88.48	99.78	85.258	1.403	-0.263317
138	846	D	10	1	120.7	88.51	99.81	85.282	1.349	-1.09169
138	846	D	10	1	123.1	88.53	99.83	85.298	1.348	-1.10758
138	846	D	10	1	125.4	88.55	99.85	85.314	1.419	-0.0201024
138	846	D	10	1	127.7	88.58	99.88	85.338	1.337	-1.27756
138	846	D	10	1	130.1	88.6	99.9	85.354	1.348	-1.10956
138	846	D	10	1	132.4	88.62	99.92	85.3699	1.383	-0.573763
138	846	D	10	1	134.7	88.65	99.95	85.3939	1.426	0.0843437
138	846	D	10	1	137.1	88.67	99.97	85.4099	1.438	0.267673
138	846	D	10	1	139.4	88.69	99.99	85.4259	1.382	-0.591065
138	846	D	10	1	141.7	88.72	100.02	85.4499	1.399	-0.331396
138	846	D	10	1	144.1	88.74	100.04	85.4659	1.442	0.326993
138	846	D	10	2	3	88.83	100.13	85.5378	1.505	1.28989
138	846	D	10	2	4.6	88.85	100.15	85.5538	1.545	1.90231
138	846	D	10	2	7.1	88.87	100.17	85.5698	1.473	0.79838
138	846	D	10	2	8	88.88	100.18	85.5778	1.48	0.905369
138	846	D	10	2	8.6	88.89	100.19	85.5858	1.446	0.384053
138	846	D	10	2	10.8	88.91	100.21	85.6018	1.476	0.843223
138	846	D	10	2	13	88.93	100.23	85.6178	1.495	1.13382
138	846	D	10	2	14.7	88.95	100.25	85.6338	1.493	1.10261
138	846	D	10	2	16.9	88.97	100.27	85.6498	1.472	0.78023
138	846	D	10	2	18.3	88.98	100.28	85.6578	1.502	1.23968
138	846	D	10	2	20.7	89.01	100.31	85.6817	1.46	0.595205
138	846	D	10	2	23	89.03	100.33	85.6977	1.506	1.29957
138	846	D	10	2	24.6	89.05	100.35	85.7139	1.517	1.46757
138	846	D	10	2	26.8	89.07	100.37	85.7301	1.503	1.25246
138	846	D	10	2	28	89.08	100.38	85.7382	1.493	1.09894
138	846	D	10	2	30.3	89.1	100.4	85.7544	1.448	0.408768
138	846	D	10	2	33	89.13	100.43	85.7786	1.505	1.28142
138	846	D	10	2	34	89.14	100.44	85.7879	1.425	0.0551743
138	846	D	10	2	36.4	89.16	100.46	85.8064	1.407	-0.221232
138	846	D	10	2	38	89.18	100.48	85.825	1.407	-0.221797
138	846	D	10	2	40.1	89.2	100.5	85.8435	1.48	0.896327
138	846	D	10	2	42.5	89.22	100.52	85.8621	1.493	1.09498
138	846	D	10	2	43	89.23	100.53	85.8714	1.464	0.650287
138	846	D	10	2	43.9	89.24	100.54	85.8807	1.44	0.282217
138	846	D	10	2	46.4	89.26	100.56	85.8995	1.458	0.557493
138	846	D	10	2	48	89.28	100.58	85.9183	1.412	-0.148
138	846	D	10	2	50	89.3	100.6	85.937	1.396	-0.393757
138	846	D	10	2	53	89.33	100.63	85.9652	1.405	-0.256684
138	846	D	10	2	53.9	89.34	100.64	85.9746	1.39	-0.486835
138	846	D	10	2	56	89.36	100.66	85.9933	1.405	-0.257532
138	846	D	10	2	58	89.38	100.68	86.0121	1.425	0.0483931
138	846	D	10	2	59.8	89.4	100.7	86.0308	1.407	-0.228013
138	846	D	10	2	62.3	89.42	100.72	86.0496	1.432	0.154535
138	846	D	10	2	63	89.43	100.73	86.059	1.424	0.0316558
138	846	D	10	2	63.7	89.44	100.74	86.0684	1.45	0.429811
138	846	D	10	2	65.9	89.46	100.76	86.0871	1.347	-1.14918
138	846	D	10	2	68	89.48	100.78	86.1059	1.384	-0.582738
138	846	D	10	2	69.8	89.5	100.8	86.1247	1.393	-0.445382
138	846	D	10	2	72	89.52	100.82	86.1434	1.369	-0.813735
138	846	D	10	2	73.5	89.53	100.83	86.1528	1.385	-0.568826
138	846	D	10	2	75.9	89.56	100.86	86.1809	1.384	-0.584998
138	846	D	10	2	78	89.58	100.88	86.1997	1.373	-0.754133
138	846	D	10	2	79.6	89.6	100.9	86.2185	1.372	-0.770022
138	846	D	10	2	81.8	89.62	100.92	86.2372	1.425	0.0416119
138	846	D	10	2	83.3	89.63	100.93	86.2466	1.409	-0.203863
138	846	D	10	2	85.8	89.66	100.96	86.2748	1.378	-0.679771
138	846	D	10	2	88	89.68	100.98	86.2935	1.388	-0.52709
138	846	D	10	2	89.4	89.69	100.99	86.3029	1.379	-0.665294
138	846	D	10	2	91.9	89.72	101.02	86.331	1.292	-1.99937
138	846	D	10	2	93	89.73	101.03	86.3404	1.378	-0.681748
138	846	D	10	2	95.6	89.76	101.06	86.3686	1.329	-1.4335
138	846	D	10	2	98	89.78	101.08	86.3873	1.353	-1.06627
138	846	D	10	2	99.3	89.79	101.09	86.3967	1.385	-0.576172
138	846	D	10	2	101.5	89.81	101.11	86.4155	1.342	-1.23569
138	846	D	10	2	103	89.83	101.13	86.4342	1.369	-0.822494
138	846	D	10	2	105.4	89.85	101.15	86.4518	1.399	-0.363324
138	846	D	10	2	108	89.88	101.18	86.4781	1.361	-0.946503
138	846	D	10	2	108.9	89.89	101.19	86.4869	1.328	-1.45249
138	846	D	10	2	111.4	89.91	101.21	86.5044	1.438	0.232637
138	846	D	10	2	113.7	89.94	101.24	86.5306	1.388	-0.534437
138	846	D	10	2	116.2	89.96	101.26	86.548	1.423	0.00135624
138	846	D	10	2	118.3	89.98	101.28	86.5654	1.416	-0.10648
138	846	D	10	2	120.8	90.01	101.31	86.5914	1.457	0.520977
138	846	D	10	2	123	90.03	101.33	86.6088	1.404	-0.291787
138	846	D	10	2	125.5	90.06	101.36	86.6349	1.351	-1.10483
138	846	D	10	2	127.7	90.08	101.38	86.6522	1.376	-0.722287
138	846	D	10	2	130.2	90.1	101.4	86.6696	1.414	-0.14052
138	846	D	10	2	132.3	90.12	101.42	86.687	1.456	0.502544
138	846	D	10	2	134.8	90.15	101.45	86.7138	1.32	-1.58244
138	846	D	10	2	137	90.17	101.47	86.732	1.378	-0.69418
138	846	D	10	2	139.5	90.19	101.49	86.7501	1.425	0.0255067
138	846	D	10	2	141.7	90.22	101.52	86.7774	1.41	-0.205209
138	846	D	10	2	144.2	90.24	101.54	86.7959	1.357	-1.01797
138	846	D	10	2	146.3	90.26	101.56	86.8147	1.383	-0.620101
138	846	D	10	3	3	90.33	101.63	86.8805	1.465	0.634532
138	846	D	10	3	4.8	90.35	101.65	86.8994	1.385	-0.591995
138	846	D	10	3	7	90.37	101.67	86.9182	1.393	-0.469964
138	846	D	10	3	8.5	90.38	101.68	86.9276	1.377	-0.715439
138	846	D	10	3	10.9	90.41	101.71	86.9558	1.412	-0.179928
138	846	D	10	3	13	90.43	101.73	86.9746	1.421	-0.0425726
138	846	D	10	3	14.5	90.44	101.74	86.984	1.435	0.171688
138	846	D	10	3	17	90.47	101.77	87.0122	1.417	-0.105001
138	846	D	10	3	18	90.48	101.78	87.0216	1.407	-0.258529
138	846	D	10	3	18.5	90.49	101.79	87.031	1.408	-0.243487
138	846	D	10	3	20.7	90.51	101.81	87.0498	1.422	-0.0295085
138	846	D	10	3	23	90.53	101.83	87.0686	1.459	0.536934
138	846	D	10	3	24.6	90.55	101.85	87.0874	1.484	0.919481
138	846	D	10	3	26.8	90.57	101.87	87.1062	1.436	0.183339
138	846	D	10	3	28.1	90.58	101.88	87.1155	1.416	-0.123433
138	846	D	10	3	30.4	90.6	101.9	87.1343	1.444	0.305088
138	846	D	10	3	33	90.63	101.93	87.1624	1.435	0.16632
138	846	D	10	3	34.2	90.64	101.94	87.1718	1.42	-0.0638306
138	846	D	10	3	36.6	90.67	101.97	87.1999	1.426	0.0272688
138	846	D	10	3	38	90.68	101.98	87.2093	1.456	0.486722
138	846	D	10	3	40.4	90.7	102	87.2281	1.431	0.103044
138	846	D	10	3	43	90.73	102.03	87.2562	1.438	0.209468
138	846	D	10	3	44	90.74	102.04	87.2656	1.456	0.485026
138	846	D	10	3	46.3	90.76	102.06	87.2843	1.436	0.177971
138	846	D	10	3	48	90.78	102.08	87.3031	1.432	0.116108
138	846	D	10	3	50.1	90.8	102.1	87.3219	1.374	-0.773279
138	846	D	10	3	52.5	90.82	102.12	87.3406	1.384	-0.620599
138	846	D	10	3	53	90.83	102.13	87.35	1.429	0.0687216
138	846	D	10	3	54	90.84	102.14	87.3594	1.423	-0.023508
138	846	D	10	3	56.3	90.86	102.16	87.3781	1.429	0.0678739
138	846	D	10	3	58	90.88	102.18	87.3969	1.427	0.0366598
138	846	D	10	3	60.1	90.9	102.2	87.4157	1.426	0.0207702
138	846	D	10	3	62.5	90.92	102.22	87.4344	1.454	0.449292
138	846	D	10	3	63	90.93	102.23	87.4438	1.46	0.540956
138	846	D	10	3	63.9	90.94	102.24	87.4532	1.453	0.433402
138	846	D	10	3	66.3	90.96	102.26	87.4719	1.483	0.892572
138	846	D	10	3	68	90.98	102.28	87.4907	1.469	0.677464
138	846	D	10	3	70	91	102.3	87.5095	1.489	0.983389
138	846	D	10	3	72.3	91.02	102.32	87.5282	1.499	1.13607
138	846	D	10	3	73	91.03	102.33	87.5376	1.461	0.553455
138	846	D	10	3	73.8	91.04	102.34	87.547	1.426	0.0168145
138	846	D	10	3	76.1	91.06	102.36	87.5657	1.451	0.399362
138	846	D	10	3	78	91.08	102.38	87.5845	1.462	0.567367
138	846	D	10	3	79.9	91.1	102.4	87.6033	1.517	1.40965
138	846	D	10	3	82.3	91.12	102.42	87.622	1.536	1.70025
138	846	D	10	3	83	91.13	102.43	87.6314	1.503	1.19426
138	846	D	10	3	83.7	91.14	102.44	87.6407	1.504	1.2093
138	846	D	10	3	86	91.16	102.46	87.6591	1.489	0.978868
138	846	D	10	3	88	91.18	102.48	87.6776	1.49	0.993628
138	846	D	10	3	89.8	91.2	102.5	87.6961	1.505	1.22293
138	846	D	10	3	92.2	91.22	102.52	87.7145	1.475	0.76263
138	846	D	10	3	93	91.23	102.53	87.7238	1.478	0.808321
138	846	D	10	3	93.6	91.24	102.54	87.7325	1.476	0.777389
138	846	D	10	3	95.7	91.26	102.56	87.7499	1.493	1.03734
138	846	D	10	3	98	91.28	102.58	87.7672	1.489	0.975478
138	846	D	10	3	99.5	91.29	102.59	87.7759	1.457	0.484811
138	846	D	10	3	101.8	91.32	102.62	87.802	1.483	0.882401
138	846	D	10	3	103.3	91.33	102.63	87.8107	1.473	0.728873
138	846	D	10	3	105.6	91.36	102.66	87.8366	1.445	0.298939
138	846	D	10	3	108	91.38	102.68	87.8538	1.437	0.175778
138	846	D	10	3	109.4	91.39	102.69	87.8625	1.393	-0.498784
138	846	D	10	3	111.8	91.42	102.72	87.8883	1.375	-0.775473
138	846	D	10	3	114.1	91.44	102.74	87.9056	1.407	-0.285653
138	846	D	10	3	116.4	91.46	102.76	87.9229	1.375	-0.776603
138	846	D	10	3	118.8	91.49	102.79	87.9488	1.434	0.126696
138	846	D	10	3	121.1	91.51	102.81	87.9661	1.407	-0.287631
138	846	D	10	3	123.4	91.53	102.83	87.9834	1.368	-0.885852
138	846	D	10	3	125.8	91.56	102.86	88.0095	1.369	-0.871375
138	846	D	10	3	128.1	91.58	102.88	88.0269	1.341	-1.30103
138	846	D	10	3	130.4	91.6	102.9	88.0442	1.327	-1.51614
138	846	D	10	3	132.7	91.63	102.93	88.0703	1.316	-1.68555
138	846	D	10	3	135.1	91.65	102.95	88.0877	1.347	-1.21106
138	846	D	10	3	137.4	91.67	102.97	88.105	1.348	-1.1963
138	846	D	10	3	139.7	91.7	103	88.1311	1.342	-1.28909
138	846	D	10	3	142.1	91.72	103.02	88.1484	1.375	-0.783949
138	846	D	10	3	144.4	91.74	103.04	88.1658	1.387	-0.60062
138	846	D	10	4	3	91.83	103.13	88.2437	1.413	-0.204726
138	846	D	10	4	4	91.84	103.14	88.2523	1.385	-0.634095
138	846	D	10	4	6.4	91.86	103.16	88.2696	1.414	-0.190249
138	846	D	10	4	8.1	91.88	103.18	88.2868	1.354	-1.11028
138	846	D	10	4	10.1	91.9	103.2	88.3041	1.319	-1.64721
138	846	D	10	4	13	91.93	103.23	88.3299	1.36	-1.01975
138	846	D	10	4	14.1	91.94	103.24	88.3387	1.32	-1.63301
138	846	D	10	4	16.2	91.96	103.26	88.3562	1.381	-0.698783
138	846	D	10	4	18	91.98	103.28	88.3736	1.366	-0.929216
138	846	D	10	4	20.2	92	103.3	88.3911	1.325	-1.55809
138	846	D	10	4	22.4	92.02	103.32	88.4086	1.395	-0.485935
138	846	D	10	4	23.2	92.03	103.33	88.4173	1.322	-1.60491
138	846	D	10	4	25.7	92.06	103.36	88.4454	1.346	-1.23797
138	846	D	10	4	28	92.08	103.38	88.4642	1.325	-1.56035
138	846	D	10	4	29.4	92.09	103.39	88.4736	1.292	-2.06634
138	846	D	10	4	31.8	92.12	103.42	88.5017	1.311	-1.77602
138	846	D	10	4	33.2	92.13	103.43	88.5111	1.34	-1.33189
138	846	D	10	4	35.7	92.16	103.46	88.5392	1.296	-2.00702
138	846	D	10	4	38	92.18	103.48	88.558	1.347	-1.22603
138	846	D	10	4	39.3	92.19	103.49	88.5673	1.374	-0.812553
138	846	D	10	4	41.8	92.22	103.52	88.5955	1.327	-1.53365
138	846	D	10	4	43.3	92.23	103.53	88.6049	1.374	-0.813684
138	846	D	10	4	45.5	92.25	103.55	88.6236	1.335	-1.4119
138	846	D	10	4	48	92.28	103.58	88.6517	1.412	-0.232765
138	846	D	10	4	49.3	92.29	103.59	88.6611	1.38	-0.723432
138	846	D	10	4	51.8	92.32	103.62	88.6893	1.473	0.700901
138	846	D	10	4	53.5	92.33	103.63	88.6986	1.43	0.0416638
138	846	D	10	4	55.5	92.35	103.65	88.7161	1.454	0.408887
138	846	D	10	4	58	92.38	103.68	88.7424	1.467	0.607258
138	846	D	10	4	59.4	92.39	103.69	88.7511	1.505	1.18931
138	846	D	10	4	61.6	92.42	103.72	88.7773	1.461	0.514181
138	846	D	10	4	63	92.43	103.73	88.7861	1.491	0.973634
138	846	D	10	4	65.5	92.45	103.75	88.8019	1.457	0.452035
138	846	D	10	4	68	92.48	103.78	88.8255	1.496	1.04884
138	846	D	10	4	69.3	92.49	103.79	88.8333	1.442	0.221037
138	846	D	10	4	71.5	92.51	103.81	88.8491	1.499	1.09397
138	846	D	10	4	73	92.53	103.83	88.8648	1.465	0.572371
138	846	D	10	4	75.4	92.55	103.85	88.8806	1.451	0.357263
138	846	D	10	4	78	92.58	103.88	88.9042	1.452	0.371739
138	846	D	10	4	79	92.59	103.89	88.9121	1.496	1.04574
138	846	D	10	4	81.5	92.61	103.91	88.9278	1.503	1.15244
138	846	D	10	4	83	92.63	103.93	88.9436	1.449	0.324353
138	846	D	10	4	85.1	92.65	103.95	88.9593	1.488	0.921444
138	846	D	10	4	88	92.68	103.98	88.9829	1.433	0.0777481
138	846	D	10	4	88.7	92.69	103.99	88.9908	1.53	1.56394
138	846	D	10	4	91	92.71	104.01	89.0065	1.484	0.858451
138	846	D	10	4	93	92.73	104.03	89.0222	1.491	0.965157
138	846	D	10	4	94.8	92.75	104.05	89.0378	1.478	0.765374
138	846	D	10	4	97.1	92.77	104.07	89.0535	1.448	0.305073
138	846	D	10	4	98.3	92.78	104.08	89.0613	1.486	0.887122
138	846	D	10	4	100.7	92.81	104.11	89.0847	1.431	0.043426
138	846	D	10	4	103	92.83	104.13	89.1004	1.483	0.839736
138	846	D	10	4	104.5	92.85	104.15	89.116	1.52	1.40618
138	846	D	10	4	106.8	92.87	104.17	89.1316	1.456	0.424844
138	846	D	10	4	108.3	92.88	104.18	89.1394	1.488	0.914946
138	846	D	10	4	110.6	92.91	104.21	89.1629	1.461	0.500336
138	846	D	10	4	112.9	92.93	104.23	89.1785	1.511	1.266
138	846	D	10	4	115.2	92.95	104.25	89.1941	1.501	1.11219
138	846	D	10	4	117.6	92.98	104.28	89.2174	1.461	0.498358
138	846	D	10	4	119.9	93	104.3	89.233	1.441	0.191303
138	846	D	10	4	122.2	93.02	104.32	89.2486	1.458	0.451254
138	846	D	10	4	124.6	93.05	104.35	89.2718	1.476	0.726248
138	846	D	10	4	126.9	93.07	104.37	89.2872	1.506	1.18542
138	846	D	10	4	129.2	93.09	104.39	89.3025	1.559	1.99705
138	846	D	10	4	131.6	93.12	104.42	89.3256	1.479	0.770244
138	846	D	10	4	133.9	93.14	104.44	89.341	1.503	1.13747
138	846	D	10	4	136.2	93.16	104.46	89.3564	1.493	0.983657
138	846	D	10	4	138.6	93.19	104.49	89.3795	1.495	1.01346
138	846	D	10	4	140.9	93.21	104.51	89.3948	1.475	0.706403
138	846	D	10	4	143.2	93.23	104.53	89.4102	1.418	-0.16766
138	846	D	10	4	145.6	93.26	104.56	89.4331	1.565	2.0842
138	846	D	10	5	3	93.33	104.63	89.4866	1.51	1.23937
138	846	D	10	5	4.8	93.35	104.65	89.5018	1.46	0.472579
138	846	D	10	5	7	93.37	104.67	89.517	1.46	0.472014
138	846	D	10	5	8.4	93.38	104.68	89.5246	1.479	0.762897
138	846	D	10	5	10.9	93.41	104.71	89.5474	1.43	0.0111485
138	846	D	10	5	13	93.43	104.73	89.5626	1.469	0.60824
138	846	D	10	5	14.6	93.45	104.75	89.5778	1.476	0.714946
138	846	D	10	5	17	93.47	104.77	89.593	1.452	0.346593
138	846	D	10	5	18.4	93.48	104.78	89.6006	1.443	0.208389
138	846	D	10	5	20.8	93.51	104.81	89.6233	1.439	0.146244
138	846	D	10	5	23	93.53	104.83	89.6385	1.437	0.11503
138	846	D	10	5	24.5	93.54	104.84	89.6461	1.424	-0.0844717
138	846	D	10	5	27	93.57	104.87	89.6688	1.39	-0.606353
138	846	D	10	5	28.3	93.58	104.88	89.6763	1.426	-0.0549529
138	846	D	10	5	30.6	93.61	104.91	89.699	1.439	0.143418
138	846	D	10	5	33	93.63	104.93	89.7141	1.421	-0.132988
138	846	D	10	5	34.5	93.64	104.94	89.7217	1.474	0.678929
138	846	D	10	5	36.8	93.67	104.97	89.7444	1.434	0.0651003
138	846	D	10	5	38.2	93.68	104.98	89.7519	1.423	-0.103752
138	846	D	10	5	40.6	93.71	105.01	89.7746	1.398	-0.487712
138	846	D	10	5	43	93.73	105.03	89.7897	1.415	-0.227761
138	846	D	10	5	44.4	93.74	105.04	89.7973	1.381	-0.749077
138	846	D	10	5	46.7	93.77	105.07	89.82	1.398	-0.489408
138	846	D	10	5	48.3	93.78	105.08	89.8276	1.4	-0.459041
138	846	D	10	5	50.6	93.81	105.11	89.8503	1.395	-0.536511
138	846	D	10	5	53	93.83	105.13	89.8654	1.432	0.0299305
138	846	D	10	5	54.3	93.84	105.14	89.873	1.477	0.719251
138	846	D	10	5	56.6	93.87	105.17	89.8957	1.517	1.33138
138	846	D	10	5	58.1	93.88	105.18	89.9032	1.478	0.733445
138	846	D	10	5	60.5	93.9	105.2	89.9184	1.547	1.79027
138	846	D	10	5	63	93.93	105.23	89.9411	1.458	0.425542
138	846	D	10	5	64.4	93.94	105.24	89.9487	1.433	0.042147
138	846	D	10	5	66.5	93.96	105.26	89.964	1.488	0.88443
138	846	D	10	5	68	93.98	105.28	89.9794	1.47	0.608024
138	846	D	10	5	70.4	94	105.3	89.9947	1.426	-0.0668199
138	846	D	10	5	73	94.03	105.33	90.0176	1.492	0.94375
138	846	D	10	5	74.2	94.04	105.34	90.0254	1.541	1.69437
138	846	D	10	5	76.5	94.06	105.36	90.0408	1.554	1.89302
138	846	D	10	5	78	94.08	105.38	90.0562	1.528	1.49402
138	846	D	10	5	80.3	94.1	105.4	90.0717	1.487	0.86515
138	846	D	10	5	83	94.13	105.43	90.0948	1.485	0.833653
138	846	D	10	5	84	94.14	105.44	90.1026	1.477	0.710775
138	846	D	10	5	86.3	94.16	105.46	90.118	1.531	1.53773
138	846	D	10	5	88	94.18	105.48	90.1334	1.516	1.3073
138	846	D	10	5	89.9	94.2	105.5	90.1489	1.458	0.417914
138	846	D	10	5	92.2	94.22	105.52	90.1643	1.403	-0.4255
138	846	D	10	5	93	94.23	105.53	90.172	1.458	0.417066
138	846	D	10	5	93.7	94.24	105.54	90.1798	1.48	0.753923
138	846	D	10	5	96	94.26	105.56	90.1954	1.495	0.983225
138	846	D	10	5	98	94.28	105.58	90.211	1.484	0.814091
138	846	D	10	5	99.8	94.3	105.6	90.2265	1.457	0.399764
138	846	D	10	5	102.1	94.32	105.62	90.2421	1.491	0.920232
138	846	D	10	5	103	94.33	105.63	90.2499	1.457	0.398916
138	846	D	10	5	103.6	94.34	105.64	90.2577	1.482	0.781746
138	846	D	10	5	105.9	94.36	105.66	90.2733	1.473	0.643261
138	846	D	10	5	108	94.38	105.68	90.2888	1.468	0.566073
138	846	D	10	5	109.7	94.4	105.7	90.3044	1.482	0.780051
138	846	D	10	5	112	94.42	105.72	90.32	1.42	-0.170634
138	846	D	10	5	114.4	94.44	105.74	90.3356	1.402	-0.44704
138	846	D	10	5	116.7	94.47	105.77	90.3589	1.41	-0.325292
138	846	D	10	5	119	94.49	105.79	90.3745	1.367	-0.984811
138	846	D	10	5	121.3	94.51	105.81	90.3901	1.448	0.255909
138	846	D	10	5	123.7	94.54	105.84	90.4136	1.376	-0.848303
138	846	D	10	5	126	94.56	105.86	90.4293	1.413	-0.281861
138	846	D	10	5	128.3	94.58	105.88	90.4451	1.433	0.0240639
138	846	D	10	5	130.7	94.61	105.91	90.4687	1.411	-0.313923
138	846	D	10	5	133	94.63	105.93	90.4844	1.439	0.114598
138	846	D	10	5	135.4	94.65	105.95	90.5002	1.383	-0.74414
138	846	D	10	5	137.7	94.68	105.98	90.5238	1.459	0.419676
138	846	D	10	5	140	94.7	106	90.5395	1.443	0.173918
138	846	D	10	5	142.4	94.72	106.02	90.5553	1.436	0.0660817
138	846	D	10	5	144.7	94.75	106.05	90.5789	1.41	-0.333203
138	846	D	10	6	3	94.83	106.13	90.6419	1.441	0.139596
138	846	D	10	6	4.8	94.85	106.15	90.6598	1.453	0.322925
138	846	D	10	6	7	94.87	106.17	90.6777	1.424	-0.122051
138	846	D	10	6	8.5	94.88	106.18	90.6867	1.429	-0.0457107
138	846	D	10	6	10.9	94.91	106.21	90.7137	1.393	-0.598241
138	846	D	10	6	13	94.93	106.23	90.7316	1.421	-0.16972
138	846	D	10	6	14.5	94.94	106.24	90.741	1.478	0.703495
138	846	D	10	6	17.1	94.97	106.27	90.7691	1.421	-0.17085
138	846	D	10	6	18	94.98	106.28	90.7785	1.421	-0.171132
138	846	D	10	6	18.5	94.99	106.29	90.7879	1.416	-0.248037
138	846	D	10	6	20.7	95.01	106.31	90.8066	1.403	-0.447821
138	846	D	10	6	23	95.03	106.33	90.8254	1.414	-0.279817
138	846	D	10	6	24.6	95.05	106.35	90.8442	1.433	0.0107841
138	846	D	10	6	26.8	95.07	106.37	90.8629	1.392	-0.618086
138	846	D	10	6	28.1	95.08	106.38	90.8723	1.381	-0.786938
138	846	D	10	6	30.6	95.11	106.41	90.9004	1.36	-1.1096
138	846	D	10	6	33	95.13	106.43	90.9192	1.396	-0.558483
138	846	D	10	6	34.3	95.14	106.44	90.9286	1.411	-0.328898
138	846	D	10	6	36.7	95.17	106.47	90.9568	1.376	-0.866104
138	846	D	10	6	38	95.18	106.48	90.9662	1.355	-1.1882
138	846	D	10	6	40.5	95.2	106.5	90.985	1.361	-1.09682
138	846	D	10	6	43	95.23	106.53	91.0132	1.365	-1.03637
138	846	D	10	6	44.2	95.24	106.54	91.0229	1.347	-1.31249
138	846	D	10	6	46.6	95.27	106.57	91.0518	1.361	-1.0988
138	846	D	10	6	48	95.28	106.58	91.0615	1.357	-1.16038
138	846	D	10	6	50.3	95.3	106.6	91.0808	1.376	-0.869777
138	846	D	10	6	53	95.33	106.63	91.1097	1.365	-1.03919
138	846	D	10	6	54.2	95.34	106.64	91.1194	1.32	-1.72908
138	846	D	10	6	56.4	95.36	106.66	91.1387	1.323	-1.68367
138	846	D	10	6	58	95.38	106.68	91.158	1.388	-0.688143
138	846	D	10	6	60.2	95.4	106.7	91.1773	1.443	0.15414
138	846	D	10	6	63	95.43	106.73	91.2062	1.378	-0.842801
138	846	D	10	6	64.1	95.44	106.74	91.2159	1.407	-0.398673
138	846	D	10	6	66.3	95.46	106.76	91.2351	1.399	-0.521834
138	846	D	10	6	68	95.48	106.78	91.2544	1.397	-0.553048
138	846	D	10	6	70.2	95.5	106.8	91.2737	1.387	-0.706858
138	846	D	10	6	72.4	95.52	106.82	91.2929	1.404	-0.446907
138	846	D	10	6	73	95.53	106.83	91.3025	1.411	-0.339918
138	846	D	10	6	74	95.54	106.84	91.3122	1.424	-0.140981
138	846	D	10	6	76.2	95.56	106.86	91.3314	1.367	-1.01504
138	846	D	10	6	78	95.58	106.88	91.3506	1.396	-0.571198
138	846	D	10	6	80.3	95.6	106.9	91.3698	1.383	-0.770982
138	846	D	10	6	82.3	95.62	106.92	91.389	1.343	-1.38453
138	846	D	10	6	83	95.63	106.93	91.3987	1.401	-0.495988
138	846	D	10	6	83.7	95.64	106.94	91.4083	1.425	-0.128482
138	846	D	10	6	86	95.66	106.96	91.4275	1.386	-0.726704
138	846	D	10	6	88	95.68	106.98	91.4467	1.391	-0.650646
138	846	D	10	6	89.7	95.7	107	91.4659	1.388	-0.697185
138	846	D	10	6	93	95.73	107.03	91.4948	1.392	-0.636734
138	846	D	10	6	93.5	95.74	107.04	91.5045	1.414	-0.299878
138	846	D	10	6	95.8	95.76	107.06	91.524	1.392	-0.637582
138	846	D	10	6	98	95.78	107.08	91.5435	1.363	-1.08256
138	846	D	10	6	99.6	95.8	107.1	91.563	1.436	0.0355665
138	846	D	10	6	101.9	95.82	107.12	91.5825	1.344	-1.37485
138	846	D	10	6	103.5	95.83	107.13	91.5922	1.391	-0.654884
138	846	D	10	6	105.7	95.86	107.16	91.6216	1.4	-0.517811
138	846	D	10	6	108	95.88	107.18	91.6411	1.371	-0.962787
138	846	D	10	6	109.5	95.89	107.19	91.6509	1.385	-0.748527
138	846	D	10	6	111.8	95.92	107.22	91.6802	1.38	-0.825997
138	846	D	10	6	114.2	95.94	107.24	91.6998	1.348	-1.31695
138	846	D	10	6	116.5	95.96	107.26	91.7194	1.361	-1.11829
138	846	D	10	6	118.8	95.99	107.29	91.7489	1.368	-1.01187
138	846	D	10	6	121.2	96.01	107.31	91.7686	1.388	-0.705944
138	846	D	10	6	123.5	96.03	107.33	91.7882	1.34	-1.44209
138	846	D	10	6	125.9	96.06	107.36	91.8178	1.369	-0.998522
138	846	D	10	6	128.2	96.08	107.38	91.8376	1.352	-1.2596
138	846	D	10	6	130.5	96.1	107.4	91.8573	1.412	-0.340698
138	846	D	10	6	132.8	96.13	107.43	91.8869	1.369	-1.0005
138	846	D	10	6	135.2	96.15	107.45	91.9069	1.415	-0.296138
138	846	D	10	6	137.5	96.17	107.47	91.9269	1.354	-1.2315
138	846	D	10	6	139.9	96.2	107.5	91.957	1.34	-1.44689
138	846	D	10	6	142.2	96.22	107.52	91.977	1.368	-1.01837
138	846	D	10	6	144.5	96.24	107.54	91.9971	1.388	-0.712442
138	846	D	10	7	3	96.33	107.63	92.0883	1.411	-0.362522
138	846	D	10	7	4.8	96.35	107.65	92.1089	1.37	-0.991392
138	846	D	10	7	7	96.37	107.67	92.1295	1.335	-1.52831
138	846	D	10	7	8.4	96.38	107.68	92.1398	1.396	-0.593802
138	846	D	10	7	10.9	96.41	107.71	92.1706	1.44	0.0796291
138	846	D	10	7	13	96.43	107.73	92.1912	1.415	-0.304049
138	846	D	10	7	14.5	96.44	107.74	92.2016	1.398	-0.564848
138	846	D	10	7	17	96.47	107.77	92.2327	1.383	-0.795564
138	846	D	10	7	18	96.48	107.78	92.2431	1.391	-0.67325
138	846	D	10	7	18.5	96.49	107.79	92.2535	1.43	-0.0758765
138	846	D	10	7	20.7	96.51	107.81	92.2742	1.403	-0.490204
138	846	D	10	7	23	96.53	107.83	92.2949	1.411	-0.368172
138	846	D	10	7	24.6	96.55	107.85	92.3158	1.397	-0.583281
138	846	D	10	7	26.8	96.57	107.87	92.3366	1.4	-0.537872
138	846	D	10	7	28.3	96.58	107.88	92.347	1.431	-0.0630949
138	846	D	10	7	30.7	96.61	107.91	92.3783	1.438	0.043329
138	846	D	10	7	33	96.63	107.93	92.3992	1.43	-0.0798322
138	846	D	10	7	34.5	96.64	107.94	92.4096	1.434	-0.0188167
138	846	D	10	7	36.7	96.67	107.97	92.4408	1.466	0.47072
138	846	D	10	7	38.2	96.68	107.98	92.4513	1.457	0.332517
138	846	D	10	7	40.7	96.71	108.01	92.4825	1.395	-0.618451
138	846	D	10	7	43	96.73	108.03	92.5034	1.456	0.31578
138	846	D	10	7	44.3	96.74	108.04	92.5136	1.456	0.315497
138	846	D	10	7	46.8	96.77	108.07	92.5445	1.464	0.437246
138	846	D	10	7	49	96.79	108.09	92.5651	1.413	-0.34487
138	846	D	10	7	51.5	96.81	108.11	92.5856	1.433	-0.0389445
138	846	D	10	7	53.7	96.84	108.14	92.6163	1.467	0.481241
138	846	D	10	7	56.1	96.86	108.16	92.6364	1.447	0.174186
138	846	D	10	7	58.3	96.88	108.18	92.6566	1.458	0.342191
138	846	D	10	7	60.8	96.91	108.21	92.6868	1.411	-0.378909
138	846	D	10	7	63	96.93	108.23	92.7069	1.496	0.923109
138	846	D	10	7	65.3	96.95	108.25	92.7272	1.451	0.232941
138	846	D	10	7	67.8	96.98	108.28	92.7575	1.5	0.982995
138	846	D	10	7	70	97	108.3	92.7777	1.467	0.476721
138	846	D	10	7	72.5	97.03	108.33	92.8081	1.437	0.0161375
138	846	D	10	7	74.7	97.05	108.35	92.826	1.464	0.429334
138	846	B	11	2	53	94.53	108.03	92.8308	1.4737	0.464475
138	846	B	11	2	54.5	94.54	108.04	92.8398	1.5	0.892642
138	846	D	10	7	77.1	97.07	108.37	92.8439	1.459	0.352147
138	846	D	10	7	79.3	97.09	108.39	92.8618	1.483	0.71937
138	846	B	11	2	56.8	94.57	108.07	92.8666	1.485	0.647802
138	846	B	11	2	58.2	94.58	108.08	92.8755	1.4708	0.417053
138	846	D	10	7	81.8	97.12	108.42	92.8886	1.471	0.534628
138	846	B	11	2	60.6	94.61	108.11	92.9024	1.511	1.06976
138	846	B	11	2	63	94.63	108.13	92.9203	1.4925	0.768243
138	846	B	11	2	64.3	94.64	108.14	92.9292	1.447	0.0277141
138	846	B	11	2	66.6	94.67	108.17	92.956	1.481	0.580088
138	846	B	11	2	68	94.68	108.18	92.965	1.5033	0.943176
138	846	B	11	2	70.4	94.7	108.2	92.9829	1.462	0.270181
138	846	B	11	2	73	94.73	108.23	93.0097	1.5	0.88763
138	846	B	11	2	74.2	94.74	108.24	93.0187	1.491	0.740942
138	846	B	11	2	76.5	94.76	108.26	93.0366	1.485	0.64279
138	846	B	11	2	78	94.78	108.28	93.0544	1.4893	0.712771
138	846	B	11	2	80.3	94.8	108.3	93.0723	1.497	0.836974
138	846	B	11	2	83	94.83	108.33	93.0992	1.4618	0.26403
138	846	B	11	2	84.1	94.84	108.34	93.1081	1.495	0.803374
138	846	B	11	2	86.4	94.86	108.36	93.126	1.499	0.867926
138	846	B	11	2	88	94.88	108.38	93.1439	1.5013	0.905361
138	846	B	11	2	90.2	94.9	108.4	93.1618	1.483	0.606556
138	846	B	11	2	93	94.93	108.43	93.1886	1.4768	0.505439
138	846	B	11	2	94	94.94	108.44	93.1976	1.449	0.052339
138	846	B	11	2	96.3	94.96	108.46	93.2154	1.483	0.604975
138	846	B	11	2	98	94.98	108.48	93.2333	1.5075	1.00306
138	846	B	11	2	100.1	95	108.5	93.2512	1.421	-0.404787
138	846	B	11	2	102.4	95.02	108.52	93.2691	1.54	1.53073
138	846	B	11	2	103	95.03	108.53	93.2781	1.4894	0.707257
138	846	B	11	2	103.9	95.04	108.54	93.287	1.453	0.114779
138	846	B	11	2	106.2	95.06	108.56	93.3049	1.546	1.62729
138	846	B	11	2	108	95.08	108.58	93.3228	1.4763	0.493344
138	846	B	11	2	110	95.1	108.6	93.3407	1.453	0.113196
138	846	B	11	2	112.3	95.12	108.62	93.3586	1.491	0.730918
138	846	B	11	2	114.6	95.15	108.65	93.3854	1.449	0.0467979
138	846	B	11	2	117	95.17	108.67	93.4033	1.458	0.192701
138	846	B	11	2	119.3	95.19	108.69	93.4212	1.403	-0.702661
138	846	B	11	2	121.6	95.22	108.72	93.448	1.464	0.28899
138	846	B	11	2	124	95.24	108.74	93.4659	1.457	0.174578
138	846	B	11	2	126.3	95.26	108.76	93.4838	1.401	-0.737045
138	846	B	11	2	128.7	95.29	108.79	93.5106	1.541	1.53992
138	846	B	11	2	131	95.31	108.81	93.5285	1.469	0.367965
138	846	B	11	2	133.3	95.33	108.83	93.5464	1.459	0.204746
138	846	B	11	2	135.7	95.36	108.86	93.5732	1.456	0.155144
138	846	B	11	2	138	95.38	108.88	93.5911	1.451	0.0732695
138	846	B	11	2	140.3	95.4	108.9	93.609	1.518	1.1628
138	846	B	11	2	142.7	95.43	108.93	93.6359	1.476	0.478689
138	846	B	11	2	145	95.45	108.95	93.6537	1.409	-0.611899
138	846	B	11	3	3	95.53	109.03	93.7252	1.4725	0.419112
138	846	B	11	3	4.9	95.55	109.05	93.7429	1.408	-0.630806
138	846	B	11	3	7.1	95.57	109.07	93.7606	1.464	0.279763
138	846	B	11	3	8	95.58	109.08	93.7695	1.4776	0.500758
138	846	B	11	3	8.6	95.59	109.09	93.7784	1.493	0.751051
138	846	B	11	3	11	95.61	109.11	93.7961	1.447	0.00212356
138	846	B	11	3	13	95.63	109.13	93.8144	1.4938	0.76355
138	846	B	11	3	14.7	95.65	109.15	93.8327	1.502	0.895889
138	846	B	11	3	17.2	95.67	109.17	93.851	1.485	0.618785
138	846	B	11	3	18.2	95.68	109.18	93.8602	1.4457	-0.0214169
138	846	B	11	3	20.3	95.7	109.2	93.8785	1.464	0.276332
138	846	D	11	1	23.9	97.04	109.44	93.8988	1.481	0.659053
138	846	B	11	3	23	95.73	109.23	93.9068	1.5058	0.956153
138	846	B	11	3	24.3	95.74	109.24	93.9164	1.499	0.844718
138	846	D	11	1	26.1	97.06	109.46	93.918	1.485	0.719786
138	846	B	11	3	26.5	95.76	109.26	93.9357	1.493	0.746566
138	846	D	11	1	28.6	97.09	109.49	93.9468	1.452	0.21323
138	846	B	11	3	28.1	95.78	109.28	93.9549	1.5303	1.35342
138	846	D	11	1	30.8	97.11	109.51	93.966	1.509	1.08616
138	846	D	11	1	33	97.13	109.53	93.9852	1.469	0.472616
138	846	D	11	1	34.8	97.15	109.55	94.0045	1.47	0.487376
138	846	D	11	1	37	97.17	109.57	94.0237	1.51	1.09979
138	846	D	11	1	39.4	97.19	109.59	94.0429	1.516	1.19117
138	846	D	11	1	41.6	97.22	109.62	94.0717	1.47	0.485398
138	846	D	11	1	43.1	97.23	109.63	94.0814	1.421	-0.265786
138	846	D	11	1	45.5	97.25	109.65	94.1006	1.496	0.882987
138	846	D	11	1	47.7	97.28	109.68	94.1296	1.415	-0.359146
138	846	D	11	1	50.2	97.3	109.7	94.1488	1.441	0.0387264
138	846	D	11	1	52.4	97.32	109.72	94.1681	1.44	0.0228368
138	846	D	11	1	53	97.33	109.73	94.1778	1.469	0.466965
138	846	D	11	1	54	97.34	109.74	94.1874	1.445	0.0988942
138	846	D	11	1	56.2	97.36	109.76	94.2067	1.525	1.32429
138	846	D	11	1	58.7	97.39	109.79	94.2356	1.466	0.419296
138	846	D	11	1	60.9	97.41	109.81	94.2549	1.519	1.23093
138	846	D	11	1	63	97.43	109.83	94.2742	1.464	0.387517
138	846	D	11	1	64.7	97.45	109.85	94.2935	1.5	0.938635
138	846	D	11	1	66.9	97.47	109.87	94.3128	1.472	0.508983
138	846	D	11	1	69.4	97.49	109.89	94.3321	1.562	1.88762
138	846	D	11	1	71.6	97.52	109.92	94.361	1.534	1.45769
138	846	D	11	1	73	97.53	109.93	94.3706	1.538	1.51871
138	846	D	11	1	75.5	97.56	109.96	94.3995	1.506	1.02747
138	846	D	11	1	77.7	97.58	109.98	94.4187	1.506	1.02691
138	846	D	11	1	80.2	97.6	110	94.4379	1.534	1.45543
138	846	D	11	1	82.4	97.62	110.02	94.4572	1.53	1.39357
138	846	D	11	1	83	97.63	110.03	94.4668	1.532	1.42393
138	846	D	11	1	84.1	97.64	110.04	94.4764	1.539	1.53092
138	846	D	11	1	86.2	97.66	110.06	94.4956	1.517	1.19322
138	846	D	11	1	88.6	97.69	110.09	94.5245	1.472	0.502767
138	846	D	11	1	90.9	97.71	110.11	94.5437	1.498	0.900639
138	846	D	11	1	93	97.73	110.13	94.5629	1.51	1.08397
138	846	D	11	1	94.8	97.75	110.15	94.5822	1.509	1.06808
138	846	D	11	1	97	97.77	110.17	94.6015	1.532	1.41998
138	846	D	11	1	99.4	97.79	110.19	94.6207	1.57	2.00174
138	846	D	11	1	101.6	97.82	110.22	94.6496	1.535	1.46454
138	846	D	11	1	103	97.83	110.23	94.6593	1.503	0.973871
138	846	D	11	1	105.4	97.85	110.25	94.6786	1.469	0.452273
138	846	D	11	1	107.9	97.88	110.28	94.7075	1.423	-0.253503
138	846	D	11	1	110.1	97.9	110.3	94.7268	1.464	0.374237
138	846	D	11	1	112.6	97.93	110.33	94.7557	1.443	0.0515748
138	846	D	11	1	114.8	97.95	110.35	94.775	1.423	-0.255481
138	846	D	11	1	117.2	97.97	110.37	94.7943	1.559	1.82809
138	846	D	11	1	119.4	97.99	110.39	94.8136	1.469	0.448317
138	846	D	11	1	121.9	98.02	110.42	94.8426	1.392	-0.732518
138	846	D	11	1	124.1	98.04	110.44	94.8616	1.407	-0.503216
138	846	D	11	1	126.6	98.07	110.47	94.8898	1.446	0.0935927
138	846	D	11	1	128.7	98.09	110.49	94.9086	1.413	-0.412681
138	846	D	11	1	131.2	98.11	110.51	94.9274	1.414	-0.397922
138	846	D	11	1	133.4	98.13	110.53	94.9462	1.33	-1.68575
138	846	D	11	1	135.9	98.16	110.56	94.9743	1.417	-0.353361
138	846	D	11	1	138.1	98.18	110.58	94.9931	1.409	-0.476522
138	846	D	11	1	140.6	98.21	110.61	95.0212	1.406	-0.523344
138	846	D	11	1	142.8	98.23	110.63	95.04	1.34	-1.53533
138	846	D	11	1	145.2	98.25	110.65	95.0588	1.366	-1.13745
138	846	D	11	2	3	98.33	110.73	95.1338	1.419	-0.327516
138	846	D	11	2	4.6	98.35	110.75	95.1519	1.483	0.652688
138	846	D	11	2	7	98.37	110.77	95.1701	1.445	0.0697917
138	846	D	11	2	9.3	98.39	110.79	95.1882	1.356	-1.29466
138	846	D	11	2	11.6	98.42	110.82	95.2154	1.419	-0.330058
138	846	D	11	2	13.2	98.43	110.83	95.2245	1.384	-0.866699
138	846	D	11	2	15.4	98.45	110.85	95.2417	1.363	-1.18908
138	846	D	11	2	17.8	98.48	110.88	95.2675	1.348	-1.41979
138	846	D	11	2	20.1	98.5	110.9	95.2847	1.351	-1.37439
138	846	D	11	2	22.4	98.52	110.92	95.3018	1.392	-0.746646
138	846	D	11	2	23	98.53	110.93	95.3104	1.374	-1.02277
138	846	D	11	2	23.9	98.54	110.94	95.3191	1.35	-1.39084
138	846	D	11	2	26.2	98.56	110.96	95.3365	1.378	-0.962319
138	846	D	11	2	28.6	98.59	110.99	95.3625	1.372	-1.05511
138	846	D	11	2	30.9	98.61	111.01	95.3799	1.373	-1.04035
138	846	D	11	2	33	98.63	111.03	95.3973	1.36	-1.24014
138	846	D	11	2	34.3	98.64	111.04	95.4058	1.354	-1.33237
138	846	D	11	2	36.6	98.67	111.07	95.4313	1.38	-0.934778
138	846	D	11	2	38.9	98.69	111.09	95.4483	1.397	-0.674827
138	846	D	11	2	41.3	98.71	111.11	95.4654	1.393	-0.73669
138	846	D	11	2	43	98.73	111.13	95.4824	1.39	-0.783228
138	846	D	11	2	45.1	98.75	111.15	95.4984	1.446	0.0743794
138	846	D	11	2	47.4	98.77	111.17	95.5144	1.409	-0.493193
138	846	D	11	2	49.8	98.8	111.2	95.5383	1.423	-0.279497
138	846	D	11	2	52.1	98.82	111.22	95.5543	1.463	0.332918
138	846	D	11	2	53	98.83	111.23	95.5623	1.425	-0.249696
138	846	D	11	2	53.6	98.84	111.24	95.5703	1.467	0.393651
138	846	D	11	2	55.9	98.86	111.26	95.5863	1.416	-0.388464
138	846	D	11	2	58.3	98.88	111.28	95.6023	1.56	1.8177
138	846	D	11	2	60.6	98.91	111.31	95.6263	1.519	1.18855
138	846	D	11	2	63	98.93	111.33	95.6423	1.5	0.896817
138	846	D	11	2	64.4	98.94	111.34	95.6503	1.515	1.1264
138	846	D	11	2	66.7	98.97	111.37	95.6743	1.435	-0.100406
138	846	D	11	2	69	98.99	111.39	95.6902	1.471	0.450711
138	846	D	11	2	71.4	99.01	111.41	95.7062	1.512	1.07845
138	846	D	11	2	73	99.03	111.43	95.7222	1.503	0.939965
138	846	D	11	2	75.1	99.05	111.45	95.7392	1.49	0.740182
138	846	D	11	2	77.5	99.07	111.47	95.7562	1.487	0.693643
138	846	D	11	2	94.4	99.24	111.64	95.9008	1.537	1.45507
138	846	D	11	2	96.7	99.27	111.67	95.9266	1.482	0.611369
138	846	D	11	2	99	99.29	111.69	95.9439	1.468	0.396261
138	846	D	11	2	101.4	99.31	111.71	95.9611	1.478	0.548941
138	846	D	11	2	103	99.33	111.73	95.9783	1.517	1.14603
138	846	D	11	2	105.2	99.35	111.75	95.9956	1.533	1.39066
138	846	D	11	2	107.5	99.38	111.78	96.0217	1.539	1.48176
138	846	D	11	2	109.8	99.4	111.8	96.039	1.475	0.500425
138	846	D	11	2	112.1	99.42	111.82	96.0564	1.503	0.928946
138	846	D	11	2	114.5	99.44	111.84	96.074	1.446	0.0548835
138	846	D	11	2	116.8	99.47	111.87	96.1009	1.512	1.06545
138	846	D	11	2	119.1	99.49	111.89	96.1189	1.483	0.620478
138	846	D	11	2	121.5	99.51	111.91	96.1368	1.512	1.06432
138	846	D	11	2	123.8	99.54	111.94	96.1641	1.499	0.864257
138	846	D	11	2	126.1	99.56	111.96	96.1829	1.539	1.47667
138	846	D	11	2	128.5	99.58	111.98	96.2016	1.523	1.23092
138	846	D	11	2	130.8	99.61	112.01	96.2298	1.533	1.38331
138	846	D	11	2	133.2	99.63	112.03	96.2485	1.539	1.4747
138	846	D	11	2	135.5	99.65	112.05	96.2673	1.504	0.937772
138	846	D	11	2	137.9	99.68	112.08	96.2954	1.451	0.124725
138	846	D	11	2	140.2	99.7	112.1	96.3142	1.461	0.277405
138	846	D	11	2	142.5	99.72	112.12	96.333	1.465	0.338138
138	846	D	11	2	144.8	99.75	112.15	96.3611	1.473	0.459886
138	846	D	11	3	3	99.83	112.23	96.4362	1.54	1.48437
138	846	D	11	3	4.9	99.85	112.25	96.4549	1.475	0.48771
138	846	D	11	3	7	99.87	112.27	96.4737	1.431	-0.187134
138	846	D	11	3	9.5	99.89	112.29	96.4924	1.431	-0.187699
138	846	D	11	3	11.7	99.92	112.32	96.5206	1.447	0.0566457
138	846	D	11	3	13.1	99.93	112.33	96.5299	1.503	0.914536
138	846	D	11	3	15.5	99.95	112.35	96.5487	1.449	0.0864471
138	846	D	11	3	17.8	99.98	112.38	96.5768	1.459	0.238845
138	846	D	11	3	20.2	100	112.4	96.5956	1.436	-0.114184
138	846	D	11	3	22.4	100.02	112.42	96.6143	1.506	0.957967
138	846	D	11	3	23	100.03	112.43	96.6237	1.488	0.681843
138	846	D	11	3	23.9	100.04	112.44	96.6331	1.548	1.60103
138	846	D	11	3	26.4	100.06	112.46	96.6519	1.452	0.129313
138	846	D	11	3	28.6	100.09	112.49	96.68	1.482	0.5882
138	846	D	11	3	31.1	100.11	112.51	96.6987	1.521	1.18529
138	846	D	11	3	33	100.13	112.53	96.7175	1.48	0.556421
138	846	D	11	3	34.5	100.14	112.54	96.7266	1.549	1.61353
138	846	D	11	3	36.8	100.17	112.57	96.7539	1.488	0.677887
138	846	D	11	3	39.3	100.19	112.59	96.772	1.458	0.217587
138	846	D	11	3	41.5	100.21	112.61	96.7902	1.423	-0.319337
138	846	D	11	3	43	100.23	112.63	96.8084	1.495	0.783463
138	846	D	11	3	45.4	100.25	112.65	96.8254	1.417	-0.412414
138	846	D	11	3	47.6	100.28	112.68	96.8509	1.536	1.41036
138	846	D	11	3	50.1	100.3	112.7	96.868	1.517	1.11862
138	846	D	11	3	52.3	100.32	112.72	96.885	1.486	0.643
138	846	D	11	3	53	100.33	112.73	96.8935	1.454	0.152333
138	846	D	11	3	53.7	100.34	112.74	96.9015	1.435	-0.139116
138	846	D	11	3	56	100.36	112.76	96.9175	1.423	-0.323575
138	846	D	11	3	58.6	100.39	112.79	96.9415	1.396	-0.738184
138	846	D	11	3	60.7	100.41	112.81	96.9574	1.407	-0.57018
138	846	D	11	3	63	100.43	112.83	96.9734	1.446	0.0269112
138	846	D	11	3	64.6	100.45	112.85	96.9894	1.455	0.164267
138	846	D	11	3	66.8	100.47	112.87	97.0054	1.432	-0.188762
138	846	D	11	3	69.3	100.49	112.89	97.0214	1.469	0.37768
138	846	D	11	3	71.5	100.51	112.91	97.0374	1.36	-1.29326
138	846	D	11	3	73	100.53	112.93	97.0534	1.457	0.192655
138	846	D	11	3	75.3	100.55	112.95	97.0694	1.422	-0.344268
138	846	D	11	3	77.6	100.58	112.98	97.0934	1.428	-0.253168
138	846	D	11	3	80	100.6	113	97.1093	1.398	-0.713469
138	846	D	11	3	82.2	100.62	113.02	97.1253	1.404	-0.622087
138	846	D	11	3	83	100.63	113.03	97.1333	1.448	0.0519092
138	846	D	11	3	83.7	100.64	113.04	97.1413	1.423	-0.331486
138	846	D	11	3	86.1	100.66	113.06	97.1573	1.467	0.342227
138	846	D	11	3	88.3	100.68	113.08	97.1733	1.411	-0.516511
138	846	D	11	3	90.8	100.71	113.11	97.1973	1.424	-0.31814
138	846	D	11	3	93	100.73	113.13	97.2133	1.437	-0.119486
138	846	D	11	3	94.6	100.75	113.15	97.2293	1.41	-0.533813
138	846	D	11	3	96.8	100.77	113.17	97.2453	1.471	0.400417
138	846	D	11	3	99.3	100.79	113.19	97.2612	1.387	-0.887407
138	846	D	11	3	101.5	100.81	113.21	97.2772	1.479	0.521883
138	846	D	11	3	103	100.83	113.23	97.2932	1.441	-0.0610134
138	846	D	11	3	105.4	100.85	113.25	97.3092	1.441	-0.0615784
138	846	D	11	3	107.6	100.88	113.28	97.3332	1.462	0.259389
138	846	D	11	3	110	100.9	113.3	97.3492	1.455	0.151552
138	846	D	11	3	112.2	100.92	113.32	97.3652	1.455	0.150987
138	846	D	11	3	114.7	100.95	113.35	97.3892	1.459	0.211437
138	846	D	11	3	116.9	100.97	113.37	97.4051	1.534	1.36021
138	846	D	11	3	119.4	100.99	113.39	97.4211	1.482	0.562771
138	846	D	11	3	121.6	101.02	113.42	97.4451	1.446	0.0102408
138	846	D	11	3	124.1	101.04	113.44	97.4611	1.482	0.561358
138	846	D	11	3	126.3	101.06	113.46	97.4771	1.516	1.08183
138	846	D	11	3	128.7	101.09	113.49	97.5011	1.52	1.14228
138	846	D	11	3	130.9	101.11	113.51	97.5171	1.438	-0.114898
138	846	D	11	3	133.4	101.13	113.53	97.5331	1.463	0.26765
138	846	D	11	3	135.6	101.16	113.56	97.557	1.478	0.49667
138	846	D	11	3	138	101.18	113.58	97.573	1.445	-0.00960449
138	846	D	11	3	140.2	101.2	113.6	97.589	1.52	1.13917
138	846	D	11	3	142.6	101.23	113.63	97.613	1.474	0.433394
138	846	D	11	3	145.1	101.25	113.65	97.629	1.518	1.10711
138	846	D	11	4	3	101.33	113.73	97.693	1.537	1.39601
138	846	D	11	4	4.9	101.35	113.75	97.7089	1.459	0.200135
138	846	D	11	4	7	101.37	113.77	97.7249	1.438	-0.122245
138	846	D	11	4	9.3	101.39	113.79	97.7409	1.496	0.766012
138	846	D	11	4	13.1	101.43	113.83	97.7729	1.472	0.397094
138	846	D	11	4	15.4	101.45	113.85	97.7889	1.507	0.932887
138	846	D	11	4	17.7	101.48	113.88	97.8129	1.556	1.68294
138	846	D	11	4	20.1	101.5	113.9	97.8289	1.474	0.425765
138	846	D	11	4	22.4	101.52	113.92	97.8449	1.423	-0.356351
138	846	D	11	4	23	101.53	113.93	97.8529	1.468	0.33297
138	846	D	11	4	23.9	101.54	113.94	97.8608	1.478	0.485933
138	846	D	11	4	26.2	101.56	113.96	97.8768	1.422	-0.372805
138	846	D	11	4	28.5	101.58	113.98	97.8928	1.39	-0.863755
138	846	D	11	4	30.9	101.61	114.01	97.9168	1.446	-0.00642958
138	846	D	11	4	33	101.63	114.03	97.9328	1.45	0.0543034
138	846	D	11	4	34.7	101.65	114.05	97.9488	1.438	-0.130156
138	846	D	11	4	37	101.67	114.07	97.9648	1.404	-0.651755
138	846	D	11	4	39.3	101.69	114.09	97.9808	1.407	-0.606346
138	846	D	11	4	41.7	101.72	114.12	98.0048	1.377	-1.06693
138	846	D	11	4	43	101.73	114.13	98.0127	1.401	-0.699423
138	846	D	11	4	45.4	101.75	114.15	98.0289	1.444	-0.0410343
138	846	D	11	4	47.8	101.78	114.18	98.0532	1.39	-0.869406
138	846	D	11	4	50.1	101.8	114.2	98.0694	1.401	-0.701401
138	846	D	11	4	52.4	101.82	114.22	98.0856	1.403	-0.671317
138	846	D	11	4	53	101.83	114.23	98.0937	1.394	-0.80952
138	846	D	11	4	53.9	101.84	114.24	98.103	1.426	-0.319419
138	846	D	11	4	56.2	101.86	114.26	98.1216	1.349	-1.49997
138	846	D	11	4	58.6	101.89	114.29	98.1495	1.374	-1.11771
138	846	D	11	4	60.9	101.91	114.31	98.1681	1.438	-0.137502
138	846	D	11	4	63	101.93	114.33	98.1867	1.416	-0.475207
138	846	D	11	4	64.7	101.95	114.35	98.2055	1.37	-1.1807
138	846	D	11	4	67	101.97	114.37	98.2243	1.424	-0.353741
138	846	D	11	4	69.3	101.99	114.39	98.2431	1.402	-0.691445
138	846	D	11	4	71.6	102.02	114.42	98.2713	1.406	-0.630995
138	846	D	11	4	73	102.03	114.43	98.2807	1.407	-0.615953
138	846	D	11	4	75.3	102.05	114.45	98.2996	1.354	-1.42872
138	846	D	11	4	77.7	102.08	114.48	98.3278	1.446	-0.0197094
138	846	D	11	4	80	102.1	114.5	98.3466	1.376	-1.09299
138	846	D	11	4	82.3	102.12	114.52	98.3654	1.459	0.178379
138	846	D	11	4	83	102.13	114.53	98.3748	1.401	-0.710725
138	846	D	11	4	83.8	102.14	114.54	98.3839	1.374	-1.12477
138	846	D	11	4	86.1	102.16	114.56	98.4022	1.472	0.376468
138	846	D	11	4	88.5	102.18	114.58	98.4204	1.39	-0.880708
138	846	D	11	4	90.8	102.21	114.61	98.4477	1.435	-0.191952
138	846	D	11	4	93	102.23	114.63	98.4659	1.396	-0.790173
138	846	D	11	4	94.6	102.25	114.65	98.4832	1.42	-0.42295
138	846	D	11	4	96.9	102.27	114.67	98.5004	1.376	-1.09779
138	846	D	11	4	99.3	102.29	114.69	98.5177	1.413	-0.531352
138	846	D	11	4	101.6	102.32	114.72	98.5436	1.421	-0.409603
138	846	D	11	4	103	102.33	114.73	98.5522	1.392	-0.854297
138	846	D	11	4	105.4	102.35	114.75	98.5695	1.438	-0.149934
138	846	D	11	4	107.7	102.38	114.78	98.5954	1.431	-0.258054
138	846	D	11	4	110	102.4	114.8	98.6127	1.46	0.185792
138	846	D	11	4	112.4	102.42	114.82	98.63	1.421	-0.412429
138	846	D	11	4	114.7	102.45	114.85	98.6547	1.421	-0.413277
138	846	D	11	4	117	102.47	114.87	98.6707	1.394	-0.827604
138	846	D	11	4	119.4	102.49	114.89	98.6867	1.406	-0.644275
138	846	D	11	4	121.7	102.52	114.92	98.7107	1.425	-0.353956
138	846	D	11	4	124.1	102.54	114.94	98.7266	1.383	-0.998151
138	846	D	11	4	126.4	102.56	114.96	98.7426	1.414	-0.523656
138	846	D	11	4	128.7	102.59	114.99	98.7666	1.407	-0.631775
138	846	D	11	4	131.1	102.61	115.01	98.7826	1.39	-0.892857
138	846	D	11	4	133.4	102.63	115.03	98.7986	1.451	0.041373
138	846	D	11	4	135.7	102.66	115.06	98.8226	1.429	-0.296614
138	846	D	11	4	138.1	102.68	115.08	98.8386	1.503	0.836835
138	846	D	11	4	140.4	102.7	115.1	98.8546	1.488	0.606402
138	846	D	11	4	142.7	102.73	115.13	98.8785	1.473	0.375687
138	846	D	11	4	145.1	102.75	115.15	98.8945	1.455	0.0992805
138	846	D	11	5	3	102.83	115.23	98.9582	1.48	0.480133
138	846	D	11	5	4.6	102.85	115.25	98.9739	1.416	-0.501201
138	846	D	11	5	6.8	102.87	115.27	98.9897	1.472	0.356407
138	846	D	11	5	9.2	102.89	115.29	99.0054	1.481	0.493762
138	846	D	11	5	11.4	102.91	115.31	99.0211	1.479	0.462548
138	846	D	11	5	13	102.93	115.33	99.0369	1.448	-0.013077
138	846	D	11	5	15.3	102.95	115.35	99.0526	1.471	0.338822
138	846	D	11	5	17.5	102.97	115.37	99.0684	1.396	-0.811082
138	846	D	11	5	20	103	115.4	99.092	1.423	-0.398168
138	846	D	11	5	22.2	103.02	115.42	99.1077	1.399	-0.766521
138	846	D	11	5	23	103.03	115.43	99.1156	1.412	-0.567585
138	846	D	11	5	23.7	103.04	115.44	99.1235	1.379	-1.07358
138	846	D	11	5	26.1	103.06	115.46	99.1392	1.416	-0.507135
138	846	D	11	5	28.3	103.08	115.48	99.1549	1.439	-0.155236
138	846	D	11	5	30.8	103.11	115.51	99.1785	1.41	-0.600494
138	846	D	11	5	33	103.13	115.53	99.1942	1.415	-0.524437
138	846	D	11	5	34.5	103.14	115.54	99.2019	1.428	-0.325501
138	846	D	11	5	36.9	103.17	115.57	99.2251	1.48	0.470526
138	846	D	11	5	39.1	103.19	115.59	99.2405	1.49	0.623206
138	846	D	11	5	41.6	103.22	115.62	99.2637	1.446	-0.0519199
138	846	D	11	5	43	103.23	115.63	99.2714	1.43	-0.297395
138	846	D	11	5	45.6	103.26	115.66	99.2945	1.474	0.376036
138	846	D	11	5	47.6	103.28	115.68	99.31	1.467	0.2682
138	846	D	11	5	50.1	103.3	115.7	99.3254	1.443	-0.100154
138	846	D	11	5	52.3	103.32	115.72	99.3408	1.489	0.604209
138	846	D	11	5	53	103.33	115.73	99.3486	1.437	-0.192949
138	846	D	11	5	53.8	103.34	115.74	99.3562	1.437	-0.193231
138	846	D	11	5	56.3	103.36	115.76	99.3715	1.483	0.511131
138	846	D	11	5	58.4	103.38	115.78	99.3868	1.477	0.418619
138	846	D	11	5	60.9	103.41	115.81	99.4098	1.492	0.647639
138	846	D	11	5	63	103.43	115.83	99.425	1.485	0.539803
138	846	D	11	5	64.7	103.45	115.85	99.4402	1.512	0.952999
138	846	D	11	5	67	103.47	115.87	99.4553	1.453	0.048288
138	846	D	11	5	69.2	103.49	115.89	99.4704	1.481	0.476809
138	846	D	11	5	71.7	103.52	115.92	99.4931	1.433	-0.259615
138	846	D	11	5	73	103.53	115.93	99.5007	1.442	-0.121977
138	846	D	11	5	75.3	103.55	115.95	99.5158	1.453	0.0460276
138	846	D	11	5	77.7	103.58	115.98	99.5385	1.514	0.979975
138	846	D	11	5	79.9	103.6	116	99.5536	1.406	-0.675637
138	846	D	11	5	82.4	103.62	116.02	99.5687	1.47	0.304567
138	846	D	11	5	83	103.63	116.03	99.5762	1.441	-0.140127
138	846	D	11	5	83.9	103.64	116.04	99.5837	1.464	0.212054
138	846	D	11	5	86	103.66	116.06	99.5986	1.437	-0.202273
138	846	D	11	5	88.5	103.68	116.08	99.6134	1.482	0.486765
138	846	D	11	5	90.7	103.71	116.11	99.6358	1.431	-0.295633
138	846	D	11	5	93	103.73	116.13	99.6507	1.45	-0.00503185
138	846	D	11	5	94.5	103.74	116.14	99.6581	1.443	-0.112586
138	846	D	11	5	96.7	103.77	116.17	99.6803	1.455	0.0704605
138	846	D	11	5	99.3	103.79	116.19	99.6952	1.439	-0.175297
138	846	D	11	5	101.4	103.81	116.21	99.71	1.425	-0.390405
138	846	D	11	5	103	103.83	116.23	99.7249	1.45	-0.00785734
138	846	D	11	5	105.3	103.85	116.25	99.7393	1.426	-0.376211
138	846	D	11	5	107.5	103.88	116.28	99.7608	1.499	0.741631
138	846	D	11	5	109.9	103.9	116.3	99.7752	1.489	0.587821
138	846	D	11	5	112.1	103.92	116.32	99.7896	1.477	0.403362
138	846	D	11	5	114.6	103.95	116.35	99.8112	1.469	0.279918
138	846	D	11	5	116.8	103.97	116.37	99.8257	1.472	0.325326
138	846	D	11	5	119.3	103.99	116.39	99.8401	1.406	-0.686657
138	846	D	11	5	121.5	104.01	116.41	99.8545	1.472	0.324196
138	846	D	11	5	123.8	104.04	116.44	99.8761	1.444	-0.105738
138	846	D	11	5	126.3	104.06	116.46	99.8906	1.407	-0.67331
138	846	D	11	5	128.5	104.08	116.48	99.9051	1.469	0.276245
138	846	D	11	5	130.9	104.11	116.51	99.9268	1.506	0.842404
138	846	D	11	5	133.1	104.13	116.53	99.9413	1.425	-0.399447
138	846	D	11	5	135.6	104.16	116.56	99.9629	1.454	0.0441166
138	846	D	11	5	137.8	104.18	116.58	99.9773	1.399	-0.799297
138	846	D	11	5	140.3	104.2	116.6	99.9917	1.441	-0.156232
138	846	D	11	5	142.5	104.22	116.62	100.006	1.408	-0.662506
138	846	D	11	5	145	104.25	116.65	100.028	1.449	-0.0350489
138	846	D	11	6	3	104.33	116.73	100.085	1.476	0.376453
138	846	D	11	6	4.7	104.35	116.75	100.1	1.472	0.314589
138	846	D	11	6	7.1	104.37	116.77	100.114	1.43	-0.329605
138	846	D	11	6	9.3	104.39	116.79	100.129	1.465	0.206188
138	846	D	11	6	11.8	104.42	116.82	100.15	1.414	-0.57621
138	846	D	11	6	13.3	104.43	116.83	100.158	1.448	-0.0554593
138	846	D	11	6	15.4	104.45	116.85	100.172	1.462	0.158519
138	846	D	11	6	17.9	104.48	116.88	100.194	1.473	0.326241
138	846	D	11	6	20.1	104.5	116.9	100.208	1.449	-0.0421126
138	846	D	11	6	23	104.53	116.93	100.23	1.464	0.186907
138	846	D	11	6	24	104.54	116.94	100.237	1.453	0.0180552
138	846	D	11	6	26.2	104.56	116.96	100.252	1.447	-0.0744569
138	846	D	11	6	28.7	104.59	116.99	100.273	1.5	0.736895
138	846	D	11	6	30.9	104.61	117.01	100.288	1.397	-0.842095
138	846	D	11	6	33	104.63	117.03	100.302	1.421	-0.474872
138	846	D	11	6	34.8	104.65	117.05	100.317	1.499	0.719875
138	846	D	11	6	37	104.67	117.07	100.332	1.443	-0.138863
138	846	D	11	6	39.5	104.69	117.09	100.346	1.407	-0.691111
138	846	D	11	6	41.7	104.72	117.12	100.368	1.416	-0.554038
138	846	D	11	6	43.3	104.73	117.13	100.375	1.431	-0.324453
138	846	D	11	6	45.5	104.75	117.15	100.39	1.46	0.119393
138	846	D	11	6	48	104.78	117.18	100.412	1.501	0.746851
138	846	D	11	6	50.2	104.8	117.2	100.427	1.41	-0.648245
138	846	D	11	6	53	104.83	117.23	100.449	1.446	-0.0974103
138	846	D	11	6	54.2	104.84	117.24	100.457	1.411	-0.634051
138	846	D	11	6	56.4	104.86	117.26	100.472	1.354	-1.50811
138	846	D	11	6	58.8	104.89	117.29	100.494	1.452	-0.00715848
138	846	D	11	6	61	104.91	117.31	100.509	1.458	0.0842235
138	846	D	11	6	63	104.93	117.33	100.524	1.448	-0.0695867
138	846	D	11	6	64.9	104.95	117.35	100.538	1.462	0.144391
138	846	D	11	6	67.1	104.97	117.37	100.553	1.407	-0.699022
138	846	D	11	6	69.5	104.99	117.39	100.568	1.401	-0.791534
138	846	D	11	6	71.7	105.02	117.42	100.59	1.458	0.0811155
138	846	D	11	6	73.3	105.03	117.43	100.598	1.481	0.433297
138	846	D	11	6	75.6	105.06	117.46	100.62	1.448	-0.0732599
138	846	D	11	6	78	105.08	117.48	100.635	1.498	0.692401
138	846	D	11	6	80.2	105.1	117.5	100.65	1.487	0.523266
138	846	D	11	6	83	105.13	117.53	100.673	1.458	0.0780074
138	846	D	11	6	84.2	105.14	117.54	100.68	1.458	0.0777249
138	846	D	11	6	86.3	105.16	117.56	100.695	1.463	0.153782
138	846	D	11	6	88.8	105.19	117.59	100.718	1.438	-0.230178
138	846	D	11	6	93	105.23	117.63	100.748	1.471	0.274401
138	846	D	11	6	94.9	105.25	117.65	100.763	1.43	-0.35447
138	846	D	11	6	97.2	105.27	117.67	100.778	1.477	0.365218
138	846	D	11	6	99.5	105.29	117.69	100.794	1.419	-0.524169
138	846	D	11	6	101.7	105.32	117.72	100.816	1.468	0.225884
138	846	D	11	6	103	105.33	117.73	100.824	1.471	0.271575
138	846	D	11	6	105.6	105.36	117.76	100.847	1.486	0.500595
138	846	D	11	6	107.8	105.38	117.78	100.862	1.491	0.576653
138	846	D	11	6	110.1	105.4	117.8	100.877	1.467	0.208299
138	846	D	11	6	112.5	105.42	117.82	100.892	1.42	-0.512518
138	846	D	11	6	114.8	105.45	117.85	100.915	1.477	0.360132
138	846	D	11	6	117.1	105.47	117.87	100.931	1.48	0.40554
138	846	D	11	6	119.5	105.49	117.89	100.946	1.449	-0.070085
138	846	D	11	6	121.8	105.52	117.92	100.969	1.471	0.266207
138	846	D	11	6	124.1	105.54	117.94	100.984	1.47	0.250317
138	846	D	11	6	126.5	105.56	117.96	100.999	1.488	0.525593
138	846	D	11	6	128.8	105.59	117.99	101.022	1.451	-0.0422614
138	846	D	11	6	131.1	105.61	118.01	101.037	1.433	-0.318668
138	846	D	11	6	133.5	105.63	118.03	101.052	1.438	-0.24261
138	846	D	11	6	135.8	105.66	118.06	101.075	1.5	0.706662
138	846	B	12	1	119.1	103.19	117.99	101.089	1.449	-0.199612
138	846	D	11	6	138.1	105.68	118.08	101.09	1.407	-0.719083
138	846	B	12	1	121.4	103.21	118.01	101.104	1.501	0.645878
138	846	D	11	6	140.5	105.7	118.1	101.105	1.455	0.0159286
138	846	B	12	1	123.8	103.24	118.04	101.126	1.444	-0.282287
138	846	D	11	6	142.8	105.73	118.13	101.128	1.497	0.658711
138	846	B	12	1	126.1	103.26	118.06	101.142	1.446	-0.250269
138	846	D	11	6	145.1	105.75	118.15	101.143	1.465	0.167761
138	846	B	12	1	128.4	103.28	118.08	101.157	1.462	0.00951374
138	846	B	12	1	130.8	103.31	118.11	101.179	1.445	-0.267865
138	846	B	12	1	133.1	103.33	118.13	101.194	1.48	0.301048
138	846	B	12	1	135.4	103.35	118.15	101.21	1.456	-0.0899504
138	846	B	12	1	137.8	103.38	118.18	101.232	1.42	-0.676451
138	846	B	12	1	140.1	103.4	118.2	101.247	1.511	0.803558
138	846	B	12	1	142.4	103.42	118.22	101.262	1.502	0.6566
138	846	B	12	1	144.8	103.45	118.25	101.289	1.483	0.346693
138	846	B	12	3	3	105.03	119.83	103.215	1.4745	0.166711
138	846	B	12	3	4.6	105.05	119.85	103.239	1.456	-0.134802
138	846	B	12	3	7.1	105.07	119.87	103.262	1.45	-0.232942
138	846	B	12	3	8	105.08	119.88	103.271	1.4426	-0.353604
138	846	B	12	3	8.6	105.09	119.89	103.28	1.437	-0.444979
138	846	B	12	3	10.8	105.11	119.91	103.298	1.398	-1.08003
138	846	B	12	3	13	105.13	119.93	103.315	1.4418	-0.367401
138	846	B	12	3	14.1	105.14	119.94	103.324	1.402	-1.01573
138	846	B	12	3	16.3	105.16	119.96	103.341	1.393	-1.16269
138	846	B	12	3	18	105.18	119.98	103.359	1.423	-0.675127
138	846	B	12	3	19.9	105.2	120	103.376	1.45	-0.236373
138	846	B	12	3	22.1	105.22	120.02	103.394	1.425	-0.643648
138	846	B	12	3	23	105.23	120.03	103.402	1.3984	-1.07668
138	846	D	12	1	20.2	106.5	120	103.407	1.414	-0.666061
138	846	B	12	3	23.8	105.24	120.04	103.411	1.427	-0.611629
138	846	D	12	1	22.4	106.52	120.02	103.425	1.383	-1.14169
138	846	B	12	3	26	105.26	120.06	103.428	1.471	0.103703
138	846	D	12	1	23.4	106.53	120.03	103.433	1.41	-0.728207
138	846	B	12	3	28	105.28	120.08	103.445	1.4193	-0.737425
138	846	B	12	3	29.5	105.29	120.09	103.454	1.406	-0.954609
138	846	D	12	1	25.9	106.56	120.06	103.459	1.392	-1.0049
138	846	D	12	1	28.1	106.58	120.08	103.476	1.408	-0.760268
138	846	D	12	1	30.5	106.6	120.1	103.494	1.429	-0.439019
138	846	D	12	1	33	106.63	120.13	103.519	1.402	-0.853628
138	846	D	12	1	34.2	106.64	120.14	103.528	1.34	-1.80403
138	846	D	12	1	36.7	106.67	120.17	103.554	1.426	-0.48697
138	846	D	12	1	38.9	106.69	120.19	103.572	1.432	-0.395588
138	846	D	12	1	41.3	106.71	120.21	103.589	1.424	-0.518749
138	846	D	12	1	43	106.73	120.23	103.606	1.439	-0.289447
138	846	D	12	1	45	106.75	120.25	103.624	1.492	0.522188
138	846	D	12	1	47.4	106.77	120.27	103.641	1.441	-0.259928
138	846	D	12	1	49.9	106.8	120.3	103.667	1.441	-0.260775
138	846	D	12	1	52.1	106.82	120.32	103.684	1.443	-0.230691
138	846	D	12	1	53.5	106.83	120.33	103.693	1.403	-0.843955
138	846	D	12	1	56	106.86	120.36	103.719	1.352	-1.62635
138	846	D	12	1	58.2	106.88	120.38	103.736	1.382	-1.16718
138	846	D	12	1	60.7	106.91	120.41	103.762	1.445	-0.202585
138	846	D	12	1	63	106.93	120.43	103.78	1.404	-0.831456
138	846	D	12	1	64.4	106.94	120.44	103.788	1.403	-0.847063
138	846	D	12	1	66.7	106.97	120.47	103.814	1.457	-0.0203864
138	846	D	12	1	68.9	106.99	120.49	103.832	1.383	-1.15497
138	846	D	12	1	71.4	107.01	120.51	103.849	1.406	-0.803067
138	846	D	12	1	73	107.03	120.53	103.866	1.425	-0.512466
138	846	D	12	1	75.2	107.05	120.55	103.883	1.451	-0.114594
138	846	D	12	1	77.4	107.07	120.57	103.901	1.442	-0.25308
138	846	D	12	1	79.9	107.1	120.6	103.926	1.392	-1.02015
138	846	D	12	1	82.1	107.12	120.62	103.944	1.385	-1.12799
138	846	D	12	1	83	107.13	120.63	103.952	1.43	-0.438669
138	846	D	12	1	83.7	107.14	120.64	103.961	1.425	-0.515574
138	846	D	12	1	86	107.16	120.66	103.979	1.423	-0.546788
138	846	D	12	1	88.3	107.18	120.68	103.996	1.43	-0.440082
138	846	D	12	1	90.7	107.21	120.71	104.022	1.366	-1.4217
138	846	D	12	1	93	107.23	120.73	104.04	1.426	-0.502793
138	846	D	12	1	94.3	107.24	120.74	104.048	1.428	-0.472426
138	846	D	12	1	96.8	107.27	120.77	104.075	1.406	-0.810413
138	846	D	12	1	99	107.29	120.79	104.092	1.406	-0.810978
138	846	D	12	1	101.5	107.31	120.81	104.109	1.373	-1.31725
138	846	D	12	1	103	107.33	120.83	104.127	1.414	-0.689512
138	846	D	12	1	105.2	107.35	120.85	104.144	1.436	-0.352938
138	846	D	12	1	107.4	107.37	120.87	104.161	1.426	-0.506748
138	846	D	12	1	109.9	107.4	120.9	104.187	1.411	-0.737464
138	846	D	12	1	112.1	107.42	120.92	104.204	1.424	-0.53881
138	846	D	12	1	114.5	107.44	120.94	104.222	1.395	-0.983786
138	846	D	12	1	116.8	107.47	120.97	104.248	1.414	-0.693468
138	846	D	12	1	121.4	107.51	121.01	104.284	1.415	-0.679274
138	846	D	12	1	123.8	107.54	121.04	104.311	1.402	-0.87934
138	846	D	12	1	126.1	107.56	121.06	104.329	1.446	-0.205626
138	846	D	12	1	128.4	107.58	121.08	104.348	1.395	-0.987742
138	846	D	12	1	130.7	107.61	121.11	104.376	1.431	-0.436907
138	846	D	12	1	133.1	107.63	121.13	104.395	1.44	-0.299551
138	846	D	12	1	135.4	107.65	121.15	104.414	1.421	-0.591282
138	846	D	12	1	137.8	107.68	121.18	104.442	1.435	-0.377587
138	846	D	12	1	140.1	107.7	121.2	104.461	1.376	-1.2823
138	846	D	12	1	142.4	107.72	121.22	104.479	1.406	-0.823128
138	846	D	12	1	144.7	107.75	121.25	104.507	1.335	-1.91202
138	846	D	12	2	3	107.83	121.33	104.582	1.433	-0.412474
138	846	D	12	2	4.7	107.85	121.35	104.602	1.455	-0.0758997
138	846	D	12	2	7.1	107.87	121.37	104.621	1.428	-0.490227
138	846	D	12	2	9.3	107.89	121.39	104.64	1.385	-1.14975
138	846	D	12	2	13.1	107.93	121.43	104.678	1.441	-0.292703
138	846	D	12	2	15.4	107.95	121.45	104.698	1.455	-0.0787252
138	846	D	12	2	17.8	107.98	121.48	104.727	1.433	-0.416712
138	846	D	12	2	20.1	108	121.5	104.746	1.46	-0.00351538
138	846	D	12	2	22.4	108.02	121.52	104.765	1.422	-0.586412
138	846	D	12	2	23.5	108.03	121.53	104.775	1.453	-0.111635
138	846	D	12	2	25.8	108.06	121.56	104.804	1.459	-0.0205352
138	846	D	12	2	28.1	108.08	121.58	104.823	1.507	0.714476
138	846	D	12	2	30.5	108.1	121.6	104.842	1.452	-0.128937
138	846	D	12	2	33	108.13	121.63	104.871	1.463	0.038785
138	846	D	12	2	34	108.14	121.64	104.881	1.46	-0.00747107
138	846	D	12	2	36.4	108.16	121.66	104.9	1.426	-0.52907
138	846	D	12	2	38.7	108.19	121.69	104.929	1.502	0.634746
138	846	D	12	2	41.1	108.21	121.71	104.948	1.522	0.940671
138	846	D	12	2	43	108.23	121.73	104.968	1.468	0.112582
138	846	D	12	2	44.9	108.25	121.75	104.987	1.475	0.219289
138	846	D	12	2	47.2	108.27	121.77	105.006	1.491	0.463916
138	846	D	12	2	49.5	108.29	121.79	105.025	1.453	-0.118981
138	846	D	12	2	51.9	108.32	121.82	105.054	1.391	-1.06995
138	846	D	12	2	53	108.33	121.83	105.064	1.463	0.0331341
138	846	D	12	2	53.6	108.34	121.84	105.073	1.448	-0.197016
138	846	D	12	2	55.7	108.36	121.86	105.091	1.407	-0.825886
138	846	D	12	2	58	108.38	121.88	105.108	1.414	-0.71918
138	846	D	12	2	60.4	108.4	121.9	105.126	1.389	-1.10286
138	846	D	12	2	63	108.43	121.93	105.153	1.416	-0.689944
138	846	D	12	2	64.3	108.44	121.94	105.161	1.424	-0.56763
138	846	D	12	2	66.5	108.46	121.96	105.177	1.389	-1.10455
138	846	D	12	2	68.8	108.49	121.99	105.201	1.409	-0.798911
138	846	D	12	2	71.2	108.51	122.01	105.217	1.327	-2.05609
138	846	D	12	2	73	108.53	122.03	105.233	1.396	-0.999259
138	846	D	12	2	74.9	108.55	122.05	105.249	1.398	-0.969176
138	846	D	12	2	77.2	108.57	122.07	105.265	1.456	-0.0809187
138	846	D	12	2	79.6	108.6	122.1	105.289	1.403	-0.893966
138	846	D	12	2	81.9	108.62	122.12	105.305	1.435	-0.404146
138	846	D	12	2	83.5	108.63	122.13	105.313	1.43	-0.481051
138	846	D	12	2	85.7	108.66	122.16	105.337	1.436	-0.389952
138	846	D	12	2	88	108.68	122.18	105.353	1.407	-0.834928
138	846	D	12	2	90.4	108.7	122.2	105.369	1.404	-0.881467
138	846	D	12	2	93	108.73	122.23	105.393	1.392	-1.06621
138	846	D	12	2	94.1	108.74	122.24	105.401	1.391	-1.08182
138	846	D	12	2	96.5	108.76	122.26	105.417	1.453	-0.132261
138	846	D	12	2	98.8	108.79	122.29	105.441	1.401	-0.929983
138	846	D	12	2	101.1	108.81	122.31	105.457	1.335	-1.94197
138	846	D	12	2	103	108.83	122.33	105.473	1.371	-1.39085
138	846	D	12	2	104.9	108.85	122.35	105.489	1.375	-1.33012
138	846	D	12	2	107.3	108.87	122.37	105.505	1.353	-1.66782
138	846	D	12	2	109.6	108.9	122.4	105.528	1.435	-0.412058
138	846	D	12	2	111.9	108.92	122.42	105.544	1.394	-1.04093
138	846	D	12	2	114.3	108.94	122.44	105.56	1.324	-2.11421
138	846	D	12	2	116.6	108.97	122.47	105.584	1.399	-0.965718
138	846	D	12	2	118.9	108.99	122.49	105.6	1.389	-1.11953
138	846	D	12	2	121.3	109.01	122.51	105.616	1.367	-1.45723
138	846	D	12	2	123.6	109.04	122.54	105.64	1.405	-0.875749
138	846	D	12	2	125.9	109.06	122.56	105.656	1.406	-0.860989
138	846	D	12	2	130.6	109.11	122.61	105.696	1.391	-1.09227
138	846	D	12	2	132.9	109.13	122.63	105.712	1.439	-0.357258
138	846	D	12	2	135.3	109.15	122.65	105.729	1.4	-0.955479
138	846	D	12	2	137.6	109.18	122.68	105.755	1.441	-0.328022
138	846	D	12	2	139.9	109.2	122.7	105.772	1.452	-0.160017
138	846	D	12	2	142.3	109.22	122.72	105.79	1.4	-0.957457
138	846	D	12	2	144.6	109.25	122.75	105.817	1.436	-0.406622
138	846	D	12	3	3	109.33	122.83	105.892	1.461	-0.0257699
138	846	D	12	3	4.7	109.35	122.85	105.911	1.427	-0.547368
138	846	D	12	3	6.9	109.37	122.87	105.929	1.433	-0.455986
138	846	D	12	3	9.4	109.39	122.89	105.948	1.41	-0.809015
138	846	D	12	3	11.5	109.42	122.92	105.976	1.464	0.0176608
138	846	D	12	3	13	109.43	122.93	105.986	1.404	-0.902093
138	846	D	12	3	15.1	109.45	122.95	106.004	1.43	-0.50422
138	846	D	12	3	17.4	109.47	122.97	106.023	1.39	-1.11777
138	846	D	12	3	19.8	109.5	123	106.051	1.414	-0.750825
138	846	D	12	3	22.1	109.52	123.02	106.07	1.486	0.351975
138	846	D	12	3	23	109.53	123.03	106.079	1.426	-0.567779
138	846	D	12	3	23.6	109.54	123.04	106.088	1.428	-0.537412
138	846	D	12	3	25.9	109.56	123.06	106.106	1.45	-0.200838
138	846	D	12	3	28.2	109.58	123.08	106.124	1.425	-0.584516
138	846	D	12	3	30.6	109.61	123.11	106.151	1.405	-0.891854
138	846	D	12	3	33	109.63	123.13	106.169	1.374	-1.36748
138	846	D	12	3	34.1	109.64	123.14	106.177	1.358	-1.61295
138	846	D	12	3	36.5	109.67	123.17	106.202	1.373	-1.38393
138	846	D	12	3	38.8	109.69	123.19	106.218	1.437	-0.40373
138	846	D	12	3	41.1	109.71	123.21	106.234	1.392	-1.0939
138	846	D	12	3	43	109.73	123.23	106.251	1.398	-1.00252
138	846	D	12	3	44.9	109.75	123.25	106.267	1.386	-1.18698
138	846	D	12	3	47.3	109.77	123.27	106.283	1.435	-0.436639
138	846	D	12	3	49.6	109.8	123.3	106.307	1.442	-0.330215
138	846	D	12	3	51.9	109.82	123.32	106.323	1.401	-0.959086
138	846	D	12	3	53.5	109.83	123.33	106.331	1.41	-0.821448
138	846	D	12	3	55.7	109.86	123.36	106.355	1.378	-1.31268
138	846	D	12	3	58.1	109.88	123.38	106.371	1.439	-0.378449
138	846	D	12	3	60.4	109.9	123.4	106.387	1.388	-1.16056
138	846	D	12	3	63	109.93	123.43	106.411	1.409	-0.839598
138	846	D	12	3	64.2	109.94	123.44	106.419	1.427	-0.564039
138	846	D	12	3	66.4	109.96	123.46	106.435	1.451	-0.196816
138	846	D	12	3	68.8	109.99	123.49	106.459	1.382	-1.25505
138	846	D	12	3	71.1	110.01	123.51	106.475	1.416	-0.734586
138	846	D	12	3	73	110.03	123.53	106.491	1.418	-0.704502
138	846	D	12	3	74.8	110.05	123.55	106.508	1.405	-0.904286
138	846	D	12	3	77.2	110.07	123.57	106.525	1.39	-1.13472
138	846	D	12	3	79.5	110.1	123.6	106.551	1.4	-0.982322
138	846	D	12	3	81.8	110.12	123.62	106.569	1.464	-0.00211766
138	846	D	12	3	83.3	110.13	123.63	106.577	1.442	-0.33954
138	846	D	12	3	85.7	110.16	123.66	106.606	1.434	-0.462983
138	846	D	12	3	88.1	110.18	123.68	106.624	1.397	-1.03056
138	846	D	12	3	90.3	110.2	123.7	106.643	1.447	-0.264895
138	846	D	12	3	93	110.23	123.73	106.671	1.431	-0.510935
138	846	D	12	3	94.1	110.24	123.74	106.681	1.47	0.0864388
138	846	D	12	3	96.4	110.26	123.76	106.7	1.464	-0.00607334
138	846	D	12	3	98.7	110.29	123.79	106.728	1.437	-0.420683
138	846	D	12	3	101.1	110.31	123.81	106.747	1.48	0.237706
138	846	D	12	3	103	110.33	123.83	106.765	1.44	-0.37584
138	846	D	12	3	104.8	110.35	123.85	106.784	1.433	-0.483676
138	846	D	12	3	107.2	110.37	123.87	106.803	1.429	-0.545539
138	846	D	12	3	109.5	110.39	123.89	106.822	1.446	-0.285588
138	846	D	12	3	111.9	110.42	123.92	106.85	1.412	-0.807469
138	846	D	12	3	114.2	110.44	123.94	106.869	1.41	-0.838683
138	846	D	12	3	116.5	110.46	123.96	106.887	1.391	-1.13041
138	846	D	12	3	118.9	110.49	123.99	106.916	1.388	-1.17724
138	846	D	12	3	121.2	110.51	124.01	106.934	1.436	-0.442224
138	846	D	12	3	123.5	110.53	124.03	106.953	1.435	-0.458113
138	846	D	12	3	125.9	110.56	124.06	106.981	1.39	-1.14856
138	846	D	12	3	128.2	110.58	124.08	107	1.435	-0.459526
138	846	D	12	3	130.5	110.6	124.1	107.019	1.375	-1.37956
138	846	D	12	3	132.9	110.63	124.13	107.047	1.46	-0.0778257
138	846	D	12	3	135.2	110.65	124.15	107.066	1.396	-1.05916
138	846	D	12	3	137.5	110.67	124.17	107.084	1.443	-0.339473
138	846	D	12	3	139.9	110.7	124.2	107.112	1.417	-0.738758
138	846	D	12	3	142.2	110.72	124.22	107.131	1.457	-0.126342
138	846	D	12	4	3	110.83	124.33	107.234	1.441	-0.374642
138	846	D	12	4	4.7	110.85	124.35	107.253	1.439	-0.405857
138	846	D	12	4	7.1	110.87	124.37	107.272	1.484	0.283181
138	846	D	12	4	9.3	110.89	124.39	107.291	1.485	0.297941
138	846	D	12	4	11.8	110.92	124.42	107.319	1.439	-0.407834
138	846	D	12	4	13.3	110.93	124.43	107.328	1.418	-0.729932
138	846	D	12	4	15.4	110.95	124.45	107.347	1.45	-0.240112
138	846	D	12	4	17.9	110.98	124.48	107.375	1.393	-1.11446
138	846	D	12	4	20.1	111	124.5	107.394	1.418	-0.73191
138	846	D	12	4	23	111.03	124.53	107.422	1.414	-0.794055
138	846	D	12	4	24.2	111.04	124.54	107.432	1.406	-0.916934
138	846	D	12	4	26.2	111.06	124.56	107.45	1.454	-0.181922
138	846	D	12	4	28.7	111.09	124.59	107.479	1.501	0.537482
138	846	D	12	4	30.9	111.11	124.61	107.497	1.375	-1.39397
138	846	D	12	4	33	111.13	124.63	107.516	1.457	-0.137927
138	846	D	12	4	34.8	111.15	124.65	107.534	1.466	-0.000571152
138	846	D	12	4	37	111.17	124.67	107.551	1.438	-0.430223
138	846	D	12	4	39.4	111.19	124.69	107.568	1.424	-0.645331
138	846	D	12	4	41.9	111.22	124.72	107.595	1.472	0.0893981
138	846	D	12	4	43.3	111.23	124.73	107.603	1.445	-0.324646
138	846	D	12	4	45.5	111.25	124.75	107.619	1.418	-0.738973
138	846	D	12	4	47.9	111.28	124.78	107.643	1.43	-0.555927
138	846	D	12	4	50.1	111.3	124.8	107.659	1.395	-1.09285
138	846	D	12	4	53	111.33	124.83	107.683	1.419	-0.725909
138	846	D	12	4	54.1	111.34	124.84	107.691	1.35	-1.78358
138	846	D	12	4	56.2	111.36	124.86	107.707	1.449	-0.267021
138	846	D	12	4	58.7	111.39	124.89	107.731	1.357	-1.67772
138	846	D	12	4	60.9	111.41	124.91	107.747	1.461	-0.08454
138	846	D	12	4	63	111.43	124.93	107.763	1.406	-0.927953
138	846	D	12	4	64.8	111.45	124.95	107.779	1.357	-1.67942
138	846	D	12	4	67	111.47	124.97	107.795	1.428	-0.591944
138	846	D	12	4	69.5	111.49	124.99	107.812	1.408	-0.899
138	846	D	12	4	71.7	111.52	125.02	107.836	1.407	-0.915172
138	846	D	12	4	73.3	111.53	125.03	107.844	1.407	-0.915454
138	846	D	12	4	75.4	111.55	125.05	107.859	1.418	-0.74745
138	846	D	12	4	77.9	111.58	125.08	107.883	1.377	-1.3766
138	846	D	12	4	80.3	111.6	125.1	107.899	1.428	-0.595617
138	846	D	12	4	83	111.63	125.13	107.923	1.439	-0.427895
138	846	D	12	4	84.1	111.64	125.14	107.931	1.449	-0.274933
138	846	D	12	4	86.2	111.66	125.16	107.947	1.451	-0.244849
138	846	D	12	4	88.6	111.69	125.19	107.97	1.438	-0.444915
138	846	D	12	4	90.8	111.71	125.21	107.986	1.449	-0.276911
138	846	D	12	4	93	111.73	125.23	108.002	1.449	-0.277476
138	846	D	12	4	94.7	111.75	125.25	108.017	1.487	0.304291
138	846	D	12	4	97	111.77	125.27	108.033	1.377	-1.38197
138	846	D	12	4	99.3	111.79	125.29	108.049	1.448	-0.294496
138	846	D	12	4	101.8	111.82	125.32	108.073	1.378	-1.36806
138	846	D	12	4	103.3	111.83	125.33	108.08	1.415	-0.801335
138	846	D	12	4	105.4	111.85	125.35	108.096	1.413	-0.832549
138	846	D	12	4	107.9	111.88	125.38	108.12	1.448	-0.297038
138	846	D	12	4	110.1	111.9	125.4	108.135	1.495	0.422649
138	846	D	12	4	112.5	111.92	125.42	108.151	1.45	-0.26752
138	846	D	12	4	114.8	111.95	125.45	108.175	1.512	0.681753
138	846	D	12	4	117.2	111.97	125.47	108.19	1.464	-0.0543892
138	846	D	12	4	119.4	111.99	125.49	108.206	1.521	0.818543
138	846	D	12	4	121.9	112.02	125.52	108.23	1.443	-0.377617
138	846	D	12	4	124.1	112.04	125.54	108.245	1.458	-0.148314
138	846	D	12	4	126.6	112.07	125.57	108.269	1.495	0.417845
138	846	D	12	4	128.8	112.09	125.59	108.285	1.452	-0.241674
138	846	D	12	4	131.2	112.11	125.61	108.3	1.467	-0.0123713
138	846	D	12	4	133.4	112.13	125.63	108.316	1.443	-0.380725
138	846	D	12	4	135.9	112.16	125.66	108.339	1.425	-0.657414
138	846	D	12	4	138.1	112.18	125.68	108.355	1.498	0.460711
138	846	D	12	4	140.6	112.21	125.71	108.379	1.454	-0.214416
138	846	D	12	4	142.8	112.23	125.73	108.394	1.459	-0.138358
138	846	D	12	4	145.2	112.25	125.75	108.41	1.443	-0.384115
138	846	D	12	4	147.4	112.27	125.77	108.426	1.443	-0.38468
138	846	D	12	5	3	112.33	125.83	108.473	1.462	-0.09521
138	846	D	12	5	4.2	112.34	125.84	108.481	1.421	-0.723798
138	846	D	12	5	6.3	112.36	125.86	108.497	1.443	-0.387223
138	846	D	12	5	8.8	112.39	125.89	108.52	1.412	-0.863131
138	846	D	12	5	11	112.41	125.91	108.536	1.411	-0.879021
138	846	D	12	5	13	112.43	125.93	108.552	1.431	-0.573095
138	846	D	12	5	14.3	112.44	125.94	108.56	1.405	-0.971815
138	846	D	12	5	16.5	112.46	125.96	108.576	1.441	-0.420698
138	846	D	12	5	18.9	112.49	125.99	108.599	1.399	-1.06518
138	846	D	12	5	23	112.53	126.03	108.631	1.393	-1.15825
138	846	D	12	5	24.9	112.55	126.05	108.646	1.332	-2.09361
138	846	D	12	5	27.2	112.57	126.07	108.662	1.383	-1.31263
138	846	D	12	5	29.6	112.6	126.1	108.686	1.429	-0.608548
138	846	D	12	5	31.9	112.62	126.12	108.702	1.451	-0.271974
138	846	D	12	5	33.4	112.63	126.13	108.71	1.421	-0.731992
138	846	D	12	5	35.7	112.66	126.16	108.733	1.445	-0.365051
138	846	D	12	5	38.1	112.68	126.18	108.749	1.436	-0.503537
138	846	D	12	5	40.4	112.7	126.2	108.765	1.431	-0.580724
138	846	D	12	5	43	112.73	126.23	108.789	1.439	-0.458976
138	846	D	12	5	44.2	112.74	126.24	108.797	1.432	-0.56653
138	846	D	12	5	46.5	112.76	126.26	108.812	1.497	0.428998
138	846	D	12	5	48.9	112.79	126.29	108.836	1.472	0.0450379
138	846	D	12	5	51.2	112.81	126.31	108.852	1.447	-0.33864
138	846	D	12	5	53	112.83	126.33	108.868	1.482	0.197153
138	846	D	12	5	55	112.85	126.35	108.885	1.431	-0.584962
138	846	D	12	5	57.3	112.87	126.37	108.903	1.464	-0.0798186
138	846	D	12	5	59.7	112.9	126.4	108.929	1.532	0.961401
138	846	D	12	5	62	112.92	126.42	108.946	1.473	0.0566893
138	846	D	12	5	63.4	112.93	126.43	108.955	1.474	0.0717313
138	846	D	12	5	65.7	112.96	126.46	108.984	1.408	-0.940534
138	846	D	12	5	68.1	112.98	126.48	109.002	1.472	0.0396695
138	846	D	12	5	70.4	113	126.5	109.021	1.489	0.299621
138	846	D	12	5	73	113.03	126.53	109.049	1.46	-0.145637
138	846	D	12	5	74.1	113.04	126.54	109.059	1.425	-0.682278
138	846	D	12	5	76.5	113.06	126.56	109.078	1.47	0.0067601
138	846	D	12	5	78.8	113.09	126.59	109.106	1.41	-0.913558
138	846	D	12	5	81.1	113.11	126.61	109.125	1.464	-0.0865997
138	846	D	12	5	83	113.13	126.63	109.144	1.398	-1.09858
138	846	D	12	5	84.9	113.15	126.65	109.163	1.424	-0.700711
138	846	D	12	5	87.2	113.17	126.67	109.181	1.418	-0.793223
138	846	D	12	5	89.5	113.19	126.69	109.2	1.382	-1.34547
138	846	D	12	5	91.9	113.22	126.72	109.229	1.41	-0.917232
138	846	D	12	5	93.3	113.23	126.73	109.238	1.455	-0.227911
138	846	D	12	5	95.7	113.26	126.76	109.266	1.456	-0.213434
138	846	D	12	5	98	113.28	126.78	109.285	1.47	0.000544023
138	846	D	12	5	100.4	113.3	126.8	109.304	1.426	-0.6743
138	846	D	12	5	103	113.33	126.83	109.332	1.434	-0.552551
138	846	D	12	5	104.1	113.34	126.84	109.341	1.346	-1.90139
138	846	D	12	5	106.5	113.36	126.86	109.36	1.381	-1.3656
138	846	D	12	5	108.8	113.39	126.89	109.388	1.418	-0.799439
138	846	D	12	5	111.1	113.41	126.91	109.407	1.414	-0.861302
138	846	D	12	5	113.5	113.43	126.93	109.425	1.463	-0.110966
138	846	D	12	5	115.8	113.46	126.96	109.454	1.472	0.0261072
138	846	D	12	5	118.1	113.48	126.98	109.472	1.367	-1.58353
138	846	D	12	5	120.5	113.5	127	109.491	1.49	0.300818
138	846	D	12	5	122.8	113.53	127.03	109.519	1.542	1.09685
138	846	D	12	5	125.1	113.55	127.05	109.538	1.477	0.100187
138	846	D	12	5	127.5	113.57	127.07	109.557	1.483	0.191569
138	846	D	12	5	129.8	113.6	127.1	109.585	1.463	-0.115769
138	846	D	12	5	132.1	113.62	127.12	109.604	1.465	-0.0856852
138	846	D	12	5	134.5	113.64	127.14	109.622	1.419	-0.791178
138	846	D	12	5	136.8	113.67	127.17	109.651	1.503	0.495234
138	846	D	12	5	139.1	113.69	127.19	109.669	1.397	-1.12973
138	846	D	12	6	3	113.83	127.33	109.801	1.458	-0.19889
138	846	D	12	6	4.6	113.85	127.35	109.82	1.387	-1.2875
138	846	D	12	6	7.1	113.87	127.37	109.838	1.473	0.0298472
138	846	D	12	6	9.3	113.89	127.39	109.857	1.387	-1.28863
138	846	D	12	6	11.7	113.92	127.42	109.885	1.427	-0.676493
138	846	D	12	6	13.2	113.93	127.43	109.895	1.431	-0.615478
138	846	D	12	6	15.4	113.95	127.45	109.914	1.466	-0.0796848
138	846	D	12	6	17.9	113.98	127.48	109.942	1.424	-0.724162
138	846	D	12	6	20.1	114	127.5	109.96	1.418	-0.816674
138	846	D	12	6	23	114.03	127.53	109.989	1.431	-0.618303
138	846	D	12	6	23.8	114.04	127.54	109.998	1.504	0.500104
138	846	D	12	6	26	114.06	127.56	110.017	1.508	0.560837
138	846	D	12	6	28.4	114.08	127.58	110.035	1.474	0.0392382
138	846	D	12	6	30.7	114.11	127.61	110.064	1.407	-0.988352
138	846	D	12	6	33	114.13	127.63	110.082	1.459	-0.192042
138	846	D	12	6	34.5	114.14	127.64	110.092	1.49	0.282735
138	846	D	12	6	37	114.17	127.67	110.12	1.457	-0.223822
138	846	D	12	6	39.2	114.19	127.69	110.138	1.457	-0.224387
138	846	D	12	6	41.7	114.22	127.72	110.167	1.519	0.724886
138	846	D	12	6	43	114.23	127.73	110.176	1.521	0.755252
138	846	D	12	6	44.9	114.25	127.75	110.195	1.489	0.264303
138	846	D	12	6	47.3	114.27	127.77	110.213	1.518	0.708148
138	846	D	12	6	49.5	114.29	127.79	110.232	1.534	0.952776
138	846	D	12	6	52	114.32	127.82	110.26	1.446	-0.396629
138	846	D	12	6	53.5	114.33	127.83	110.27	1.508	0.553208
138	846	D	12	6	55.7	114.36	127.86	110.298	1.452	-0.305813
138	846	D	12	6	58.1	114.38	127.88	110.317	1.479	0.107384
138	846	D	12	6	60.3	114.4	127.9	110.335	1.475	0.0455211
138	846	D	12	6	63	114.43	127.93	110.363	1.517	0.688303
138	846	D	12	6	64.1	114.44	127.94	110.373	1.424	-0.737159
138	846	D	12	6	66.6	114.47	127.97	110.401	1.481	0.13549
138	846	D	12	6	68.7	114.49	127.99	110.42	1.53	0.885827
138	846	D	12	6	71.2	114.51	128.01	110.438	1.501	0.440851
138	846	D	12	6	73	114.53	128.03	110.457	1.501	0.440285
138	846	D	12	6	74.6	114.55	128.05	110.476	1.427	-0.694294
138	846	D	12	6	77.1	114.57	128.07	110.495	1.447	-0.388369
138	846	D	12	6	79.3	114.59	128.09	110.513	1.449	-0.358285
138	846	D	12	6	81.7	114.62	128.12	110.541	1.524	0.790206
138	846	D	12	6	83.3	114.63	128.13	110.551	1.503	0.468109
138	846	D	12	6	85.4	114.65	128.15	110.57	1.493	0.314299
138	846	D	12	6	87.9	114.68	128.18	110.598	1.481	0.129557
138	846	D	12	6	90.1	114.7	128.2	110.617	1.54	1.03314
138	846	D	12	6	93	114.73	128.23	110.645	1.505	0.495933
138	846	D	12	6	93.8	114.74	128.24	110.654	1.488	0.235133
138	846	D	12	6	96.3	114.76	128.26	110.673	1.575	1.5678
138	846	D	12	6	98.5	114.78	128.28	110.692	1.47	-0.0418383
138	846	D	12	6	101	114.81	128.31	110.72	1.504	0.478348
138	846	D	12	6	103	114.83	128.33	110.739	1.501	0.431809
138	846	D	12	6	104.6	114.85	128.35	110.758	1.475	0.0328064
138	846	D	12	6	107.1	114.87	128.37	110.776	1.437	-0.55009
138	846	D	12	6	109.3	114.89	128.39	110.795	1.424	-0.749874
138	846	D	12	6	111.8	114.92	128.42	110.823	1.47	-0.045794
138	846	D	12	6	113.9	114.94	128.44	110.842	1.451	-0.337525
138	846	D	12	6	116.4	114.96	128.46	110.859	1.441	-0.491335
138	846	D	12	6	118.6	114.99	128.49	110.886	1.436	-0.568805
138	846	D	12	6	121.1	115.01	128.51	110.903	1.491	0.273478
138	846	D	12	6	123.3	115.03	128.53	110.921	1.48	0.104343
138	846	D	12	6	125.8	115.06	128.56	110.945	1.43	-0.66273
138	846	D	12	6	127.9	115.08	128.58	110.961	1.475	0.0263078
138	846	D	12	6	130.4	115.1	128.6	110.977	1.424	-0.755808
138	846	D	12	6	132.6	115.13	128.63	111.001	1.457	-0.250946
138	846	D	12	6	135.1	115.15	128.65	111.017	1.451	-0.343458
138	846	D	12	6	137.3	115.17	128.67	111.033	1.471	-0.0375332
138	846	D	12	6	139.6	115.2	128.7	111.057	1.4	-1.12642
138	846	D	12	7	2.7	115.33	128.83	111.161	1.51	0.555602
138	846	D	12	7	5.5	115.35	128.85	111.177	1.498	0.371143
138	846	D	12	7	7.9	115.38	128.88	111.201	1.49	0.247699
138	846	D	12	7	10.1	115.4	128.9	111.217	1.423	-0.779609
138	846	D	12	7	12.6	115.43	128.93	111.241	1.392	-1.25552
138	846	D	12	7	14.7	115.45	128.95	111.256	1.383	-1.394
138	846	D	12	7	17.3	115.47	128.97	111.272	1.395	-1.21067
138	846	D	12	7	19.5	115.49	128.99	111.288	1.351	-1.88552
138	846	D	12	7	21.9	115.52	129.02	111.311	1.379	-1.45728
138	846	D	12	7	24.1	115.54	129.04	111.327	1.403	-1.09005
138	846	B	13	1	145.2	112.95	129.4	111.346	1.448	-0.516908
138	846	D	12	7	26.6	115.57	129.07	111.351	1.397	-1.18285
138	846	D	12	7	28.8	115.59	129.09	111.367	1.376	-1.50523
138	846	D	12	7	31.3	115.61	129.11	111.382	1.396	-1.1993
138	846	D	12	7	33.5	115.63	129.13	111.398	1.366	-1.6596
138	846	B	13	2	2.7	113.03	129.48	111.412	1.448	-0.519028
138	846	B	13	2	5.4	113.05	129.5	111.431	1.394	-1.39814
138	846	B	13	2	8	113.08	129.53	111.46	1.4373	-0.693888
138	846	B	13	2	9.4	113.09	129.54	111.469	1.363	-1.90348
138	846	B	13	2	11.6	113.12	129.57	111.498	1.376	-1.69284
138	846	B	13	2	14	113.14	129.59	111.517	1.42	-0.977474
138	846	B	13	2	16.2	113.16	129.61	111.536	1.407	-1.18951
138	846	B	13	2	18.7	113.19	129.64	111.565	1.409	-1.15776
138	846	B	13	2	20.9	113.21	129.66	111.584	1.36	-1.95544
138	846	B	13	2	23	113.23	129.68	111.604	1.3698	-1.79602
138	846	B	13	2	24.8	113.25	129.7	111.623	1.367	-1.8427
138	846	B	13	2	27	113.27	129.72	111.642	1.402	-1.27377
138	846	B	13	2	29.4	113.29	129.74	111.661	1.33	-2.44571
138	846	B	13	2	31.9	113.32	129.77	111.69	1.436	-0.721912
138	846	B	13	2	34.1	113.34	129.79	111.709	1.422	-0.95021
138	846	B	13	2	36.5	113.36	129.81	111.729	1.454	-0.430116
138	846	B	13	2	38.1	113.38	129.83	111.748	1.4393	-0.669258
138	846	B	13	2	40.2	113.4	129.85	111.767	1.461	-0.317284
138	846	B	13	2	42.7	113.43	129.88	111.796	1.4	-1.31053
138	846	B	13	2	44.8	113.45	129.9	111.815	1.42	-0.985647
138	846	B	13	2	47.3	113.47	129.92	111.834	1.429	-0.839755
138	846	B	13	2	49.5	113.49	129.94	111.853	1.434	-0.75893
138	846	B	13	2	52	113.52	129.97	111.882	1.424	-0.922418
138	846	B	13	2	53.5	113.53	129.98	111.892	1.4325	-0.784393
138	846	B	13	2	55.7	113.56	130.01	111.921	1.494	0.215395
138	846	B	13	2	58.2	113.58	130.03	111.94	1.478	-0.0454451
138	846	B	13	2	60.3	113.6	130.05	111.959	1.471	-0.159861
138	846	B	13	2	62.8	113.63	130.08	111.988	1.41	-1.15309
138	846	B	13	2	65	113.65	130.1	112.007	1.44	-0.665533
138	846	B	13	2	67.5	113.67	130.12	112.026	1.454	-0.438289
138	846	B	13	2	68	113.68	130.13	112.036	1.4438	-0.60451
138	846	B	13	2	68.8	113.69	130.14	112.046	1.405	-1.23603
138	846	B	13	2	71.2	113.71	130.16	112.065	1.484	0.0487426
138	846	B	13	2	73.4	113.73	130.18	112.084	1.395	-1.39974
138	846	B	13	2	75.9	113.76	130.21	112.113	1.39	-1.48196
138	846	B	13	2	78.1	113.78	130.23	112.132	1.4	-1.31972
138	846	B	13	2	80.6	113.81	130.26	112.161	1.434	-0.767373
138	846	B	13	2	83	113.83	130.28	112.18	1.4328	-0.786881
138	846	B	13	2	84.2	113.84	130.29	112.19	1.444	-0.605465
138	846	B	13	2	86.7	113.87	130.32	112.218	1.463	-0.297139
138	846	B	13	2	88.9	113.89	130.34	112.238	1.416	-1.06234
138	846	B	13	2	91.3	113.91	130.36	112.257	1.461	-0.330738
138	846	B	13	2	93.5	113.93	130.38	112.276	1.415	-1.07966
138	846	B	13	2	96	113.96	130.41	112.305	1.398	-1.35709
138	846	B	13	2	98	113.98	130.43	112.324	1.4357	-0.74474
138	846	B	13	2	99	113.99	130.44	112.334	1.479	-0.0399923
138	846	B	13	2	101.3	114.01	130.46	112.353	1.508	0.431304
138	846	B	13	2	103.8	114.04	130.49	112.382	1.422	-0.968676
138	846	B	13	2	106	114.06	130.51	112.401	1.41	-1.16444
138	846	B	13	2	108.5	114.08	130.53	112.42	1.396	-1.39275
138	846	B	13	2	110.7	114.11	130.56	112.449	1.417	-1.05188
138	846	B	13	2	113.1	114.13	130.58	112.468	1.421	-0.987326
138	846	B	13	2	115.3	114.15	130.6	112.487	1.464	-0.288255
138	846	B	13	2	117.8	114.18	130.63	112.515	1.472	-0.158893
138	846	D	13	1	4.8	115.85	130.45	112.524	1.416	-0.930675
138	846	B	13	2	120	114.2	130.65	112.527	1.445	-0.598701
138	846	B	13	2	122.5	114.22	130.67	112.539	1.439	-0.696841
138	846	D	13	1	9.3	115.89	130.49	112.548	1.418	-0.901156
138	846	B	13	2	124.7	114.25	130.7	112.557	1.464	-0.290902
138	846	D	13	1	11.6	115.92	130.52	112.566	1.439	-0.580189
138	846	B	13	2	127.1	114.27	130.72	112.569	1.394	-1.43025
138	846	D	13	1	13.2	115.93	130.53	112.572	1.449	-0.427227
138	846	D	13	1	15.4	115.95	130.55	112.585	1.44	-0.565712
138	846	D	13	1	17.8	115.98	130.58	112.603	1.406	-1.08759
138	846	D	13	1	20.1	116	130.6	112.615	1.434	-0.659072
138	846	D	13	1	22.4	116.02	130.62	112.627	1.428	-0.751584
138	846	D	13	1	23	116.03	130.63	112.633	1.414	-0.96641
138	846	D	13	1	23.9	116.04	130.64	112.639	1.434	-0.660202
138	846	D	13	1	26.2	116.06	130.66	112.651	1.376	-1.54959
138	846	D	13	1	28.5	116.08	130.68	112.663	1.433	-0.676657
138	846	D	13	1	30.9	116.11	130.71	112.681	1.442	-0.539584
138	846	D	13	1	33	116.13	130.73	112.693	1.429	-0.739368
138	846	D	13	1	34.7	116.15	130.75	112.706	1.42	-0.877854
138	846	D	13	1	37	116.17	130.77	112.718	1.454	-0.357385
138	846	D	13	1	39.3	116.19	130.79	112.73	1.434	-0.664441
138	846	D	13	1	41.7	116.22	130.82	112.748	1.383	-1.44684
138	846	D	13	1	43.1	116.23	130.83	112.754	1.454	-0.35908
138	846	D	13	1	45.5	116.25	130.85	112.766	1.513	0.544501
138	846	D	13	1	47.8	116.28	130.88	112.784	1.441	-0.559712
138	846	D	13	1	50.1	116.3	130.9	112.797	1.4	-1.18858
138	846	D	13	1	53	116.33	130.93	112.815	1.433	-0.683721
138	846	D	13	1	53.9	116.34	130.94	112.821	1.456	-0.331539
138	846	D	13	1	56.3	116.36	130.96	112.834	1.447	-0.470025
138	846	D	13	1	58.6	116.39	130.99	112.852	1.468	-0.149058
138	846	D	13	1	60.9	116.41	131.01	112.865	1.397	-1.23766
138	846	D	13	1	63	116.43	131.03	112.877	1.425	-0.809142
138	846	D	13	1	64.7	116.45	131.05	112.891	1.428	-0.763734
138	846	D	13	1	67.1	116.47	131.07	112.905	1.408	-1.07079
138	846	D	13	1	69.4	116.49	131.09	112.919	1.42	-0.88746
138	846	D	13	1	71.7	116.52	131.12	112.939	1.378	-1.53194
138	846	D	13	1	73.2	116.53	131.13	112.946	1.436	-0.643398
138	846	D	13	1	75.5	116.56	131.16	112.968	1.393	-1.3032
138	846	D	13	1	77.8	116.58	131.18	112.982	1.395	-1.27312
138	846	D	13	1	80.2	116.6	131.2	112.996	1.452	-0.400184
138	846	D	13	1	83	116.63	131.23	113.018	1.428	-0.76882
138	846	D	13	1	84	116.64	131.24	113.025	1.404	-1.13689
138	846	D	13	1	86.3	116.66	131.26	113.04	1.488	0.149803
138	846	D	13	1	88.6	116.69	131.29	113.061	1.357	-1.85856
138	846	D	13	1	91	116.71	131.31	113.076	1.429	-0.755756
138	846	D	13	1	93	116.73	131.33	113.09	1.43	-0.740996
138	846	D	13	1	94.7	116.75	131.35	113.105	1.413	-1.00208
138	846	D	13	1	97.1	116.77	131.37	113.12	1.446	-0.496934
138	846	D	13	1	99.4	116.79	131.39	113.135	1.466	-0.191009
138	846	D	13	1	101.8	116.82	131.42	113.157	1.453	-0.391075
138	846	D	13	1	103.3	116.83	131.43	113.164	1.467	-0.176815
138	846	D	13	1	105.5	116.85	131.45	113.179	1.435	-0.667764
138	846	D	13	1	107.9	116.88	131.48	113.201	1.489	0.158912
138	846	D	13	1	110.2	116.9	131.5	113.216	1.412	-1.02164
138	846	D	13	1	112.5	116.92	131.52	113.231	1.418	-0.930259
138	846	D	13	1	114.9	116.95	131.55	113.253	1.424	-0.839159
138	846	D	13	1	117.2	116.97	131.57	113.269	1.454	-0.379989
138	846	D	13	1	119.5	116.99	131.59	113.284	1.441	-0.579773
138	846	D	13	1	121.9	117.02	131.62	113.306	1.396	-1.27022
138	846	D	13	1	124.2	117.04	131.64	113.322	1.391	-1.34741
138	846	D	13	1	126.6	117.07	131.67	113.344	1.363	-1.77735
138	846	D	13	1	128.9	117.09	131.69	113.36	1.37	-1.67064
138	846	D	13	1	131.2	117.11	131.71	113.375	1.364	-1.76315
138	846	D	13	1	133.6	117.14	131.74	113.398	1.347	-2.02452
138	846	D	13	1	135.9	117.16	131.76	113.413	1.309	-2.60741
138	846	D	13	1	138.2	117.18	131.78	113.428	1.358	-1.85708
138	846	D	13	1	140.6	117.21	131.81	113.451	1.339	-2.14909
138	846	D	13	1	142.9	117.23	131.83	113.467	1.298	-2.77796
138	846	D	13	2	3	117.33	131.93	113.544	1.4	-1.21768
138	846	D	13	2	4.8	117.35	131.95	113.559	1.409	-1.08033
138	846	D	13	2	7	117.37	131.97	113.575	1.328	-2.32218
138	846	D	13	2	9.4	117.39	131.99	113.59	1.352	-1.95496
138	846	D	13	2	11.6	117.42	132.02	113.613	1.388	-1.40412
138	846	D	13	2	13.1	117.43	132.03	113.621	1.354	-1.92544
138	846	D	13	2	15.5	117.45	132.05	113.636	1.337	-2.18652
138	846	D	13	2	17.7	117.48	132.08	113.66	1.421	-0.900108
138	846	D	13	2	20.2	117.5	132.1	113.676	1.35	-1.98871
138	846	D	13	2	22.4	117.52	132.12	113.691	1.343	-2.09655
138	846	D	13	2	23.4	117.53	132.13	113.699	1.358	-1.86697
138	846	D	13	2	25.9	117.56	132.16	113.723	1.381	-1.51535
138	846	D	13	2	28.1	117.58	132.18	113.738	1.349	-2.0063
138	846	D	13	2	30.6	117.61	132.21	113.762	1.357	-1.88455
138	846	D	13	2	33	117.63	132.23	113.778	1.374	-1.6246
138	846	D	13	2	34.4	117.64	132.24	113.786	1.361	-1.8241
138	846	D	13	2	36.6	117.67	132.27	113.809	1.396	-1.28859
138	846	D	13	2	39	117.69	132.29	113.825	1.387	-1.42708
138	846	D	13	2	41.5	117.71	132.31	113.84	1.322	-2.42373
138	846	D	13	2	43	117.73	132.33	113.856	1.36	-1.84197
138	846	D	13	2	45.1	117.75	132.35	113.874	1.364	-1.78123
138	846	D	13	2	47.6	117.78	132.38	113.901	1.371	-1.67481
138	846	D	13	2	49.8	117.8	132.4	113.919	1.351	-1.98187
138	846	D	13	2	52.3	117.82	132.42	113.937	1.416	-0.986337
138	846	D	13	2	53	117.83	132.43	113.946	1.387	-1.43103
138	846	D	13	2	53.7	117.84	132.44	113.955	1.361	-1.82975
138	846	D	13	2	55.9	117.86	132.46	113.974	1.377	-1.58512
138	846	D	13	2	60.6	117.91	132.51	114.021	1.401	-1.21875
138	846	D	13	2	63	117.93	132.53	114.04	1.384	-1.47983
138	846	D	13	2	64.3	117.94	132.54	114.049	1.377	-1.58738
138	846	D	13	2	66.7	117.97	132.57	114.077	1.449	-0.484867
138	846	D	13	2	69	117.99	132.59	114.096	1.386	-1.45088
138	846	D	13	2	71.3	118.01	132.61	114.115	1.413	-1.03768
138	846	D	13	2	73	118.03	132.63	114.134	1.412	-1.05357
138	846	D	13	2	75.1	118.05	132.65	114.153	1.427	-0.824266
138	846	D	13	2	77.4	118.07	132.67	114.171	1.476	-0.0739301
138	846	D	13	2	79.7	118.1	132.7	114.2	1.378	-1.57658
138	846	D	13	2	82.1	118.12	132.72	114.218	1.434	-0.718973
138	846	D	13	2	83.5	118.13	132.73	114.228	1.408	-1.11769
138	846	D	13	2	85.9	118.16	132.76	114.256	1.466	-0.229718
138	846	D	13	2	88.2	118.18	132.78	114.275	1.414	-1.02716
138	846	D	13	2	90.5	118.2	132.8	114.293	1.423	-0.889803
138	846	D	13	2	93	118.23	132.83	114.321	1.413	-1.0439
138	846	D	13	2	94.1	118.24	132.84	114.331	1.371	-1.68781
138	846	D	13	2	96.5	118.26	132.86	114.35	1.398	-1.27461
138	846	D	13	2	98.8	118.29	132.89	114.378	1.379	-1.56662
138	846	D	13	2	101.1	118.31	132.91	114.396	1.413	-1.04616
138	846	D	13	2	103	118.33	132.93	114.415	1.413	-1.04672
138	846	D	13	2	104.9	118.35	132.95	114.434	1.438	-0.664173
138	846	D	13	2	107.2	118.37	132.97	114.453	1.393	-1.35434
138	846	D	13	2	109.5	118.39	132.99	114.471	1.471	-0.159594
138	846	D	13	2	111.9	118.42	133.02	114.499	1.472	-0.145117
138	846	D	13	2	114.2	118.44	133.04	114.518	1.4	-1.24905
138	846	D	13	2	116.5	118.46	133.06	114.536	1.364	-1.8013
138	846	D	13	2	118.9	118.49	133.09	114.563	1.425	-0.867347
138	846	D	13	2	121.2	118.51	133.11	114.581	1.428	-0.821939
138	846	D	13	2	123.5	118.53	133.13	114.599	1.411	-1.08302
138	846	D	13	2	125.9	118.56	133.16	114.625	1.433	-0.746729
138	846	D	13	2	128.2	118.58	133.18	114.642	1.453	-0.440804
138	846	D	13	2	130.6	118.61	133.21	114.667	1.43	-0.794115
138	846	D	13	2	132.9	118.63	133.23	114.684	1.408	-1.13182
138	846	D	13	2	135.2	118.65	133.25	114.7	1.483	0.0169537
138	846	D	13	2	137.6	118.68	133.28	114.724	1.481	-0.014543
138	846	D	13	2	139.9	118.7	133.3	114.74	1.464	-0.275625
138	846	D	13	2	142.3	118.72	133.32	114.756	1.537	0.8425
138	846	D	13	3	3	118.83	133.43	114.845	1.526	0.670822
138	846	D	13	3	4.9	118.85	133.45	114.861	1.503	0.317793
138	846	D	13	3	7	118.87	133.47	114.877	1.489	0.102685
138	846	D	13	3	9.5	118.89	133.49	114.893	1.498	0.24004
138	846	D	13	3	11.7	118.92	133.52	114.917	1.494	0.177895
138	846	D	13	3	13.2	118.93	133.53	114.925	1.518	0.5454
138	846	D	13	3	15.4	118.95	133.55	114.941	1.515	0.498862
138	846	D	13	3	17.7	118.98	133.58	114.965	1.498	0.237497
138	846	D	13	3	20.1	119	133.6	114.981	1.503	0.313555
138	846	D	13	3	22.4	119.02	133.62	114.997	1.544	0.941295
138	846	D	13	3	23	119.03	133.63	115.005	1.51	0.419979
138	846	D	13	3	23.9	119.04	133.64	115.013	1.495	0.189828
138	846	D	13	3	26.2	119.06	133.66	115.029	1.436	-0.714883
138	846	D	13	3	28.5	119.08	133.68	115.045	1.493	0.158049
138	846	D	13	3	30.9	119.11	133.71	115.069	1.397	-1.31395
138	846	D	13	3	33	119.13	133.73	115.085	1.472	-0.165178
138	846	D	13	3	34	119.14	133.74	115.093	1.441	-0.640521
138	846	D	13	3	36.3	119.16	133.76	115.109	1.395	-1.34601
138	846	D	13	3	38.7	119.19	133.79	115.133	1.406	-1.17829
138	846	D	13	3	41	119.21	133.81	115.149	1.437	-0.703797
138	846	D	13	3	43	119.23	133.83	115.165	1.433	-0.76566
138	846	D	13	3	44.8	119.25	133.85	115.181	1.447	-0.551682
138	846	D	13	3	47.1	119.27	133.87	115.197	1.405	-1.19588
138	846	D	13	3	49.5	119.29	133.89	115.213	1.436	-0.721382
138	846	D	13	3	51.8	119.32	133.92	115.237	1.426	-0.875474
138	846	D	13	3	53.3	119.33	133.93	115.245	1.43	-0.814459
138	846	D	13	3	55.6	119.36	133.96	115.27	1.416	-1.02985
138	846	D	13	3	57.9	119.38	133.98	115.286	1.438	-0.693276
138	846	D	13	3	60.3	119.4	134	115.303	1.383	-1.53669
138	846	D	13	3	63	119.43	134.03	115.328	1.417	-1.0165
138	846	D	13	3	64.1	119.44	134.04	115.337	1.387	-1.47652
138	846	D	13	3	66.4	119.46	134.06	115.356	1.435	-0.74151
138	846	D	13	3	68.7	119.49	134.09	115.384	1.429	-0.834304
138	846	D	13	3	71	119.51	134.11	115.403	1.452	-0.482406
138	846	D	13	3	73	119.53	134.13	115.422	1.434	-0.758812
138	846	D	13	3	74.8	119.55	134.15	115.44	1.404	-1.21911
138	846	D	13	3	77.3	119.57	134.17	115.459	1.409	-1.14305
138	846	D	13	3	79.6	119.6	134.2	115.488	1.376	-1.64961
138	846	D	13	3	81.9	119.62	134.22	115.506	1.435	-0.74603
138	846	D	13	3	83.5	119.63	134.23	115.516	1.417	-1.02215
138	846	D	13	3	85.8	119.66	134.26	115.544	1.435	-0.747161
138	846	D	13	3	88.2	119.68	134.28	115.563	1.43	-0.824348
138	846	D	13	3	90.4	119.7	134.3	115.582	1.412	-1.10075
138	846	D	13	3	93.1	119.73	134.33	115.61	1.436	-0.733814
138	846	D	13	3	93.7	119.74	134.34	115.619	1.418	-1.00994
138	846	D	13	3	96.1	119.76	134.36	115.638	1.472	-0.182979
138	846	D	13	3	98.4	119.78	134.38	115.657	1.398	-1.31756
138	846	D	13	3	100.7	119.81	134.41	115.685	1.405	-1.21113
138	846	D	13	3	103	119.83	134.43	115.704	1.389	-1.45689
138	846	D	13	3	104.5	119.84	134.44	115.713	1.485	0.0139794
138	846	D	13	3	106.8	119.87	134.47	115.742	1.457	-0.415955
138	846	D	13	3	109.2	119.89	134.49	115.76	1.464	-0.309248
138	846	D	13	3	111.5	119.92	134.52	115.788	1.514	0.45613
138	846	D	13	3	113.9	119.94	134.54	115.807	1.492	0.118426
138	846	D	13	3	116.2	119.96	134.56	115.826	1.462	-0.341875
138	846	D	13	3	118.5	119.99	134.59	115.854	1.478	-0.0975304
138	846	D	13	3	120.9	120.01	134.61	115.873	1.488	0.0551496
138	846	D	13	3	123.2	120.03	134.63	115.891	1.454	-0.466449
138	846	D	13	3	125.5	120.06	134.66	115.92	1.507	0.344903
138	846	D	13	3	127.9	120.08	134.68	115.938	1.421	-0.973571
138	846	D	13	3	130.2	120.1	134.7	115.957	1.482	-0.0393404
138	846	D	13	3	132.6	120.13	134.73	115.985	1.516	0.480845
138	846	D	13	3	134.9	120.15	134.75	116.002	1.47	-0.224647
138	846	D	13	3	137.2	120.17	134.77	116.018	1.438	-0.715597
138	846	D	13	3	139.6	120.2	134.8	116.043	1.398	-1.32943
138	846	D	13	3	141.9	120.22	134.82	116.059	1.492	0.110514
138	846	D	13	4	3	120.33	134.93	116.147	1.466	-0.291031
138	846	D	13	4	4.7	120.35	134.95	116.163	1.474	-0.169
138	846	D	13	4	7.1	120.37	134.97	116.179	1.43	-0.843844
138	846	D	13	4	9.3	120.39	134.99	116.195	1.453	-0.491945
138	846	D	13	4	11.8	120.42	135.02	116.219	1.401	-1.28967
138	846	D	13	4	13.2	120.43	135.03	116.227	1.409	-1.16735
138	846	D	13	4	15.4	120.45	135.05	116.243	1.49	0.0733665
138	846	D	13	4	17.9	120.48	135.08	116.267	1.431	-0.831628
138	846	D	13	4	20.1	120.5	135.1	116.283	1.406	-1.21531
138	846	D	13	4	23	120.53	135.13	116.307	1.431	-0.83304
138	846	D	13	4	24	120.54	135.14	116.315	1.373	-1.72214
138	846	D	13	4	26.2	120.56	135.16	116.331	1.438	-0.726616
138	846	D	13	4	28.7	120.59	135.19	116.355	1.414	-1.09525
138	846	D	13	4	30.9	120.61	135.21	116.371	1.434	-0.789327
138	846	D	13	4	33	120.63	135.23	116.387	1.412	-1.12703
138	846	D	13	4	34.8	120.65	135.25	116.403	1.393	-1.41876
138	846	D	13	4	37	120.67	135.27	116.419	1.489	0.0518259
138	846	D	13	4	39.5	120.69	135.29	116.435	1.45	-0.546395
138	846	D	13	4	41.7	120.72	135.32	116.459	1.38	-1.61996
138	846	D	13	4	43.3	120.73	135.33	116.467	1.43	-0.854016
138	846	D	13	4	45.5	120.75	135.35	116.483	1.423	-0.961853
138	846	D	13	4	48	120.78	135.38	116.507	1.426	-0.916727
138	846	D	13	4	50.2	120.8	135.4	116.523	1.507	0.323994
138	846	D	13	4	53	120.83	135.43	116.546	1.467	-0.289834
138	846	D	13	4	53.9	120.84	135.44	116.555	1.427	-0.903097
138	846	D	13	4	56.1	120.86	135.46	116.571	1.517	0.475544
138	846	D	13	4	58.5	120.88	135.48	116.587	1.501	0.229787
138	846	D	13	4	60.7	120.91	135.51	116.611	1.528	0.642701
138	846	D	13	4	63	120.93	135.53	116.628	1.505	0.289672
138	846	D	13	4	64.6	120.95	135.55	116.645	1.517	0.473001
138	846	D	13	4	66.8	120.97	135.57	116.662	1.473	-0.201843
138	846	D	13	4	69.3	120.99	135.59	116.68	1.456	-0.462925
138	846	D	13	4	71.5	121.01	135.61	116.697	1.517	0.471306
138	846	D	13	4	73	121.03	135.63	116.714	1.49	0.0569787
138	846	D	13	4	75.2	121.05	135.65	116.732	1.522	0.546798
138	846	D	13	4	77.7	121.08	135.68	116.758	1.461	-0.388845
138	846	D	13	4	79.9	121.1	135.7	116.775	1.451	-0.542655
138	846	D	13	4	82.3	121.12	135.72	116.792	1.515	0.437549
138	846	D	13	4	83	121.13	135.73	116.801	1.468	-0.282986
138	846	D	13	4	83.8	121.14	135.74	116.809	1.445	-0.635733
138	846	D	13	4	86.2	121.16	135.76	116.826	1.559	1.1107
138	846	D	13	4	88.5	121.18	135.78	116.842	1.514	0.420529
138	846	D	13	4	90.7	121.21	135.81	116.867	1.469	-0.269922
138	846	D	13	4	93	121.23	135.83	116.884	1.472	-0.224514
138	846	D	13	4	94.7	121.25	135.85	116.9	1.501	0.219332
138	846	D	13	4	96.8	121.27	135.87	116.916	1.422	-0.99187
138	846	D	13	4	99.3	121.29	135.89	116.932	1.46	-0.410103
138	846	D	13	4	101.4	121.31	135.91	116.948	1.421	-1.00832
138	846	D	13	4	103	121.33	135.93	116.964	1.454	-0.50318
138	846	D	13	4	105.2	121.35	135.95	116.98	1.498	0.170533
138	846	D	13	4	107.7	121.38	135.98	117.004	1.477	-0.152129
138	846	D	13	4	109.9	121.4	136	117.02	1.453	-0.520483
138	846	D	13	4	112.4	121.42	136.02	117.036	1.405	-1.25662
138	846	D	13	4	114.6	121.45	136.05	117.06	1.442	-0.690465
138	846	D	13	4	117.1	121.47	136.07	117.075	1.46	-0.415189
138	846	D	13	4	119.2	121.49	136.09	117.091	1.444	-0.660946
138	846	D	13	4	121.7	121.52	136.12	117.115	1.471	-0.248032
138	846	D	13	4	123.9	121.54	136.14	117.131	1.409	-1.19872
138	846	D	13	4	126.4	121.56	136.16	117.147	1.437	-0.770196
138	846	D	13	4	128.6	121.59	136.19	117.171	1.473	-0.219361
138	846	D	13	4	131	121.61	136.21	117.187	1.465	-0.342522
138	846	D	13	4	133.2	121.63	136.23	117.204	1.459	-0.435034
138	846	D	13	4	135.7	121.66	136.26	117.228	1.437	-0.773021
138	846	D	13	4	137.9	121.68	136.28	117.244	1.448	-0.605017
138	846	D	13	4	140.4	121.7	136.3	117.26	1.426	-0.942721
138	846	D	13	4	142.6	121.73	136.33	117.284	1.409	-1.20409
138	846	D	13	5	3	121.83	136.43	117.364	1.458	-0.45601
138	846	D	13	5	4.8	121.85	136.45	117.38	1.409	-1.20748
138	846	D	13	5	7	121.87	136.47	117.396	1.476	-0.181299
138	846	D	13	5	9.4	121.89	136.49	117.412	1.358	-1.99016
138	846	D	13	5	11.6	121.92	136.52	117.436	1.454	-0.519851
138	846	D	13	5	13.1	121.93	136.53	117.444	1.436	-0.795975
138	846	D	13	5	15.6	121.96	136.56	117.468	1.516	0.429139
138	846	D	13	5	17.8	121.98	136.58	117.484	1.468	-0.307003
138	846	D	13	5	20.2	122	136.6	117.5	1.487	-0.0164021
138	846	D	13	5	22.4	122.02	136.62	117.516	1.454	-0.522676
138	846	D	13	5	23	122.03	136.63	117.524	1.451	-0.568932
138	846	D	13	5	23.9	122.04	136.64	117.532	1.523	0.53415
138	846	D	13	5	26.3	122.06	136.66	117.548	1.486	-0.0334219
138	846	D	13	5	28.5	122.08	136.68	117.564	1.486	-0.033987
138	846	D	13	5	31	122.11	136.71	117.588	1.459	-0.448597
138	846	D	13	5	33	122.13	136.73	117.604	1.44	-0.740327
138	846	D	13	5	34.7	122.15	136.75	117.62	1.411	-1.1853
138	846	D	13	5	37.2	122.17	136.77	117.636	1.472	-0.251073
138	846	D	13	5	39.4	122.19	136.79	117.652	1.43	-0.895268
138	846	D	13	5	41.7	122.22	136.82	117.676	1.444	-0.681572
138	846	D	13	5	43.2	122.23	136.83	117.684	1.499	0.160993
138	846	D	13	5	45.7	122.26	136.86	117.709	1.491	0.0375497
138	846	D	13	5	47.9	122.28	136.88	117.725	1.531	0.649965
138	846	D	13	5	50.4	122.3	136.9	117.741	1.465	-0.362018
138	846	D	13	5	53	122.33	136.93	117.765	1.479	-0.148322
138	846	D	13	5	54	122.34	136.94	117.774	1.485	-0.0566578
138	846	D	13	5	56.5	122.36	136.96	117.791	1.44	-0.746826
138	846	D	13	5	58.7	122.39	136.99	117.817	1.476	-0.195991
138	846	D	13	5	61.1	122.41	137.01	117.834	1.497	0.125259
138	846	D	13	5	63	122.43	137.03	117.851	1.49	0.0174218
138	846	D	13	5	64.7	122.45	137.05	117.868	1.527	0.583864
138	846	D	13	5	67.2	122.47	137.07	117.886	1.492	0.0469407
138	846	D	13	5	69.4	122.49	137.09	117.903	1.466	-0.352062
138	846	D	13	5	71.7	122.52	137.12	117.929	1.54	0.781105
138	846	D	13	5	73.3	122.53	137.13	117.938	1.479	-0.153973
138	846	D	13	5	75.7	122.56	137.16	117.966	1.498	0.136345
138	846	D	13	5	77.9	122.58	137.18	117.984	1.552	0.963304
138	846	D	13	5	80.3	122.6	137.2	118.003	1.505	0.242486
138	846	D	13	5	83	122.63	137.23	118.031	1.527	0.578778
138	846	D	13	5	84	122.64	137.24	118.04	1.514	0.379277
138	846	D	13	5	86.4	122.66	137.26	118.059	1.488	-0.0197258
138	846	D	13	5	88.6	122.69	137.29	118.087	1.529	0.607732
138	846	D	13	5	91.1	122.71	137.31	118.106	1.473	-0.251006
138	846	D	13	5	93	122.73	137.33	118.125	1.48	-0.1443
138	846	D	13	5	94.9	122.75	137.35	118.144	1.49	0.00838029
138	846	D	13	5	97.1	122.77	137.37	118.162	1.503	0.207034
138	846	D	13	5	99.5	122.79	137.39	118.181	1.496	0.0991972
138	846	D	13	5	101.7	122.82	137.42	118.209	1.454	-0.54528
138	846	D	13	5	103.2	122.83	137.43	118.219	1.519	0.450531
138	846	D	13	5	105.6	122.86	137.46	118.247	1.525	0.54163
138	846	D	13	5	107.8	122.88	137.48	118.266	1.497	0.111979
138	846	D	13	5	110.3	122.9	137.5	118.285	1.517	0.417904
138	846	D	13	5	112.5	122.92	137.52	118.303	1.467	-0.348887
138	846	D	13	5	115	122.95	137.55	118.331	1.53	0.61571
138	846	D	13	5	117.2	122.97	137.57	118.35	1.463	-0.411598
138	846	D	13	5	119.6	123	137.6	118.378	1.567	1.1813
138	846	D	13	5	121.8	123.02	137.62	118.397	1.519	0.445162
138	846	D	13	5	124.3	123.04	137.64	118.416	1.522	0.490571
138	846	D	13	5	126.5	123.06	137.66	118.435	1.528	0.581953
138	846	D	13	5	129	123.09	137.69	118.463	1.567	1.17876
138	846	D	13	5	131.2	123.11	137.71	118.481	1.553	0.963653
138	846	D	13	5	133.6	123.14	137.74	118.509	1.509	0.288527
138	846	D	13	5	135.8	123.16	137.76	118.528	1.556	1.00821
138	846	D	13	5	138.3	123.18	137.78	118.547	1.543	0.80843
138	846	D	13	5	140.5	123.2	137.8	118.566	1.525	0.532024
138	846	D	13	5	143	123.23	137.83	118.594	1.493	0.0407915
138	846	D	13	6	3	123.33	137.93	118.688	1.533	0.650947
138	846	D	13	6	4.7	123.35	137.95	118.706	1.525	0.527785
138	846	D	13	6	7.2	123.37	137.97	118.725	1.571	1.23215
138	846	D	13	6	9.4	123.39	137.99	118.744	1.499	0.128218
138	846	D	13	6	11.8	123.42	138.02	118.772	1.658	2.56397
138	846	D	13	6	13.3	123.43	138.03	118.781	1.606	1.76681
138	846	D	13	6	15.4	123.45	138.05	118.8	1.604	1.7356
138	846	D	13	6	17.9	123.48	138.08	118.828	1.584	1.42826
138	846	D	13	6	20.1	123.5	138.1	118.847	1.565	1.13653
138	846	D	13	6	23	123.53	138.13	118.875	1.535	0.675945
138	846	D	13	6	23.6	123.54	138.14	118.884	1.603	1.71773
138	846	D	13	6	25.8	123.56	138.16	118.902	1.583	1.41067
138	846	D	13	6	28.3	123.58	138.18	118.921	1.531	0.613234
138	846	D	13	6	30.5	123.6	138.2	118.939	1.575	1.28695
138	846	D	13	6	33	123.63	138.23	118.967	1.552	0.933636
138	846	D	13	6	34.4	123.64	138.24	118.975	1.578	1.33179
138	846	D	13	6	36.6	123.67	138.27	119.001	1.581	1.37692
138	846	D	13	6	39.1	123.69	138.29	119.018	1.589	1.49895
138	846	D	13	6	41.3	123.71	138.31	119.036	1.583	1.40644
138	846	D	13	6	43	123.73	138.33	119.053	1.551	0.915486
138	846	D	13	6	45.1	123.75	138.35	119.07	1.569	1.19076
138	846	D	13	6	47.6	123.78	138.38	119.096	1.57	1.20524
138	846	D	13	6	49.8	123.8	138.4	119.114	1.546	0.836886
138	846	D	13	6	52.3	123.82	138.42	119.131	1.493	0.0241211
138	846	D	13	6	53	123.83	138.43	119.14	1.54	0.744091
138	846	D	13	6	53.8	123.84	138.44	119.148	1.55	0.897053
138	846	D	13	6	56	123.86	138.46	119.163	1.483	-0.130254
138	846	D	13	6	58.4	123.88	138.48	119.179	1.514	0.344241
138	846	D	13	6	60.6	123.91	138.51	119.203	1.543	0.787804
138	846	D	13	6	63	123.93	138.53	119.218	1.499	0.11296
138	846	D	13	6	64.5	123.94	138.54	119.226	1.434	-0.883416
138	846	D	13	6	66.7	123.97	138.57	119.25	1.461	-0.470502
138	846	D	13	6	69.2	123.99	138.59	119.266	1.474	-0.271848
138	846	D	13	6	71.4	124.01	138.61	119.281	1.497	0.0800508
138	846	D	13	6	73	124.03	138.63	119.297	1.504	0.186757
138	846	D	13	6	75.1	124.05	138.65	119.313	1.479	-0.196921
138	846	D	13	6	77.6	124.08	138.68	119.336	1.494	0.0320994
138	846	D	13	6	79.8	124.1	138.7	119.352	1.494	0.0315343
138	846	D	13	6	82.3	124.12	138.72	119.368	1.475	-0.260197
138	846	D	13	6	83	124.13	138.73	119.376	1.449	-0.658917
138	846	D	13	6	83.7	124.14	138.74	119.383	1.494	0.0304041
138	846	D	13	6	85.9	124.16	138.76	119.399	1.42	-1.10418
138	846	D	13	6	88.4	124.18	138.78	119.415	1.518	0.397062
138	846	D	13	6	90.6	124.21	138.81	119.438	1.483	-0.140143
138	846	D	13	6	93	124.23	138.83	119.454	1.545	0.809411
138	846	D	13	6	94.5	124.24	138.84	119.462	1.527	0.533288
138	846	D	13	6	96.7	124.27	138.87	119.485	1.494	0.0267309
138	846	D	13	6	99.1	124.29	138.89	119.5	1.517	0.37863
138	846	D	13	6	101.6	124.32	138.92	119.524	1.612	1.83361
138	846	D	13	6	103	124.33	138.93	119.531	1.574	1.251
138	846	D	13	6	105.2	124.35	138.95	119.547	1.64	2.26185
138	846	D	13	6	107.7	124.38	138.98	119.57	1.656	2.50619
138	846	D	13	6	109.9	124.4	139	119.586	1.586	1.43291
138	846	D	13	6	112.3	124.42	139.02	119.601	1.537	0.681447
138	846	D	13	6	114.5	124.44	139.04	119.617	1.55	0.8801
138	846	D	13	6	117	124.47	139.07	119.64	1.579	1.32366
138	846	D	13	6	119.2	124.49	139.09	119.656	1.597	1.59894
138	846	D	13	6	121.7	124.52	139.12	119.68	1.631	2.11913
138	846	D	13	6	123.9	124.54	139.14	119.695	1.551	0.8926
138	846	D	13	6	126.3	124.56	139.16	119.711	1.632	2.13332
138	846	D	13	6	128.5	124.58	139.18	119.727	1.577	1.28991
138	846	D	13	6	131	124.61	139.21	119.75	1.543	0.768026
138	846	D	13	6	133.2	124.63	139.23	119.766	1.533	0.614215
138	846	D	13	6	135.7	124.66	139.26	119.789	1.559	1.01181
138	846	D	13	6	137.9	124.68	139.28	119.805	1.535	0.643452
138	846	D	13	6	140.3	124.7	139.3	119.82	1.582	1.36314
138	846	D	13	6	142.5	124.72	139.32	119.836	1.597	1.59244
138	846	D	13	7	3	124.83	139.43	119.922	1.56	1.02233
138	846	D	13	7	4.7	124.85	139.45	119.938	1.533	0.607999
138	846	D	13	7	6.9	124.87	139.47	119.953	1.555	0.944573
138	846	D	13	7	9.4	124.89	139.49	119.969	1.55	0.867386
138	846	D	13	7	11.5	124.92	139.52	119.992	1.567	1.12705
138	846	D	13	7	13.1	124.93	139.53	120	1.563	1.06547
138	846	D	13	7	15.4	124.95	139.55	120.016	1.641	2.26022
138	846	D	13	7	17.6	124.98	139.58	120.039	1.534	0.619651
138	846	D	13	7	20.2	125	139.6	120.054	1.609	1.76842
138	846	D	13	7	22.3	125.02	139.62	120.07	1.568	1.13955
138	846	D	13	7	23	125.03	139.63	120.078	1.59	1.47641
138	846	D	13	7	23.8	125.04	139.64	120.086	1.574	1.23094
138	846	D	13	7	26.1	125.06	139.66	120.101	1.486	-0.118187
138	846	D	13	7	28.6	125.09	139.69	120.124	1.547	0.815761
138	846	D	13	7	30.8	125.11	139.71	120.14	1.55	0.86117
138	846	D	13	7	33	125.13	139.73	120.156	1.55	0.860605
138	846	D	13	7	34.7	125.15	139.75	120.171	1.583	1.36575
138	846	D	13	7	36.9	125.17	139.77	120.187	1.612	1.80959
138	846	D	13	7	39.4	125.19	139.79	120.202	1.559	0.99683
138	846	D	13	7	41.6	125.22	139.82	120.225	1.551	0.873386
138	846	D	13	7	44.1	125.24	139.84	120.241	1.562	1.04139
138	846	D	13	7	46.3	125.26	139.86	120.257	1.553	0.902905
138	846	D	13	7	48.7	125.29	139.89	120.28	1.568	1.13193
138	846	D	13	7	50.9	125.31	139.91	120.295	1.473	-0.324469
138	846	D	13	7	53.4	125.33	139.93	120.311	1.478	-0.248411
138	846	D	13	7	55.6	125.36	139.96	120.334	1.481	-0.203286
138	846	D	13	7	58.1	125.38	139.98	120.35	1.477	-0.265149
138	846	D	13	7	60.3	125.4	140	120.366	1.465	-0.449608
138	846	D	13	7	62.7	125.43	140.03	120.389	1.527	0.499664
138	846	D	13	7	64.9	125.45	140.05	120.405	1.456	-0.588941
138	846	D	13	7	67.4	125.47	140.07	120.421	1.501	0.100097
138	846	B	14	2	97.4	123.47	140.62	120.432	1.54	0.683877
138	846	B	14	2	98	123.48	140.63	120.44	1.56	1.009
138	846	D	13	7	69.6	125.5	140.1	120.444	1.438	-0.866195
[truncated: 1,756 more rows]
