# Supplementary material for: A Revised Mid-Pliocene Composite Section for ODP Site 846
Source: Copernicus journal article supplement (doi:10.5194/cp-2019-133), 2020-02-21
Supplement: Supplementary file 6 [file Table S5 846B reflectance composite.xls]

## Sheet: 846B composite refl w 846D
TABLE S5: 846B REFLECTANCE COMPOSITE
Leg	Site	Hole	core	section	cm		mbsf	mcd	log depth	Channel 1	Channel 2	Channel 3	Channel 4	Channel 5	Channel 6	Channel 7	Channel 8	Channel 9	Channel 10	Channnel 1 normalized, detrended
138	846	B	10	1	5	7	83.06	95.65	81.6153	31.8	33.4	34.4	34.7	35.5	39.9	43.7	45.2	46.1	48	-1.1194
138	846	B	10	1	9	11	83.1	95.69	81.6476	31.2	32.1	32.6	32.7	33	36.7	40.3	41.6	42.7	44.5	-1.18246
138	846	B	10	1	13	15	83.14	95.73	81.6798	30.8	31.9	32.3	32.4	32.6	36.2	39.8	41.2	42.1	43.8	-1.2247
138	846	B	10	1	17	19	83.18	95.77	81.7121	29.7	30.8	31.4	31.4	31.7	35.6	39.2	40.4	41.5	43.5	-1.33979
138	846	B	10	1	21	23	83.22	95.81	81.7444	28.5	30	31	31.4	32	36.8	40.9	42.5	43.7	45.9	-1.46528
138	846	B	10	1	25	27	83.26	95.85	81.7766	34.4	35.7	36.1	35.9	35.9	39.1	42.3	43.5	44.6	46.6	-0.85196
138	846	B	10	1	29	31	83.3	95.89	81.8089	35.7	37.1	37.4	37	36.8	39.8	43	44.2	45	47.1	-0.717307
138	846	B	10	1	33	35	83.34	95.93	81.8412	40.1	41.6	41.8	41.2	41	43.6	46.4	47.6	48.2	50.4	-0.260073
138	846	B	10	1	37	39	83.38	95.97	81.8735	38.6	40.3	40.7	40.3	40.2	43.1	46.2	47.3	48.1	49.8	-0.416782
138	846	B	10	1	41	43	83.42	96.01	81.9058	42.3	43.8	44.1	43.6	43.2	45.5	48.5	49.3	49.9	51.6	-0.0323888
138	846	B	10	1	45	47	83.46	96.05	81.938	41.6	43.2	43.3	42.9	42.8	45.7	48.6	49.9	50.6	52	-0.105851
138	846	B	10	1	49	51	83.5	96.09	81.9703	38.9	39.6	39.4	38.8	38.7	41.2	44.4	45.4	46.2	48.4	-0.387431
138	846	B	10	1	53	55	83.54	96.13	82.0026	43.1	44.8	44.9	44.3	43.7	45.9	48.7	49.7	50	52	0.0489922
138	846	B	10	1	57	59	83.58	96.17	82.0349	41.8	43.1	43	42.3	41.7	43.9	46.6	47.6	48.4	50.1	-0.0869055
138	846	B	10	1	61	63	83.62	96.21	82.0671	43.1	44.5	44.4	43.8	43.2	45.6	48.5	49.5	50.2	51.6	0.0477476
138	846	B	10	1	65	67	83.66	96.25	82.0994	44	45.6	45.8	45.1	44.4	46.6	49.2	50	50.8	51.9	0.140777
138	846	B	10	1	69	71	83.7	96.29	82.1317	40.1	41.1	41.1	40.5	40.1	42.6	45.5	46.5	47.3	49.3	-0.265671
138	846	B	10	1	73	75	83.74	96.33	82.1639	41.7	42.8	43	42.5	42	44.5	47.3	48.4	49.1	50.6	-0.0998002
138	846	B	10	1	77	79	83.78	96.37	82.1962	42.9	44.2	44.4	44.1	43.8	46.3	49.1	50.1	50.7	52.3	0.0244475
138	846	B	10	1	81	83	83.82	96.41	82.2285	40.4	41.8	42.2	42.2	42.3	45.1	48.1	49.3	50	51.7	-0.23632
138	846	B	10	1	85	87	83.86	96.45	82.2607	38.2	39.9	40.4	40.6	41	44.2	47.4	48.7	49.6	51.4	-0.465871
138	846	B	10	1	89	91	83.9	96.49	82.293	36.7	38.9	40	40.7	41.8	46	49.7	51.2	52.3	54.4	-0.62258
138	846	B	10	1	93	95	83.94	96.53	82.3253	35.8	37.9	38.9	39.6	40.7	44.4	47.9	49.4	50.4	52.1	-0.716854
138	846	B	10	1	97	99	83.98	96.57	82.3575	33.9	36	37	37.6	38.4	42.2	45.7	47.1	48.3	50	-0.915188
138	846	B	10	1	101	103	84.02	96.61	82.3898	33.3	35	36.1	36.6	37.4	41.3	44.9	46.2	47.4	49.4	-0.978244
138	846	B	10	1	105	107	84.06	96.65	82.4221	30.8	32.6	33.5	34.1	35.1	39.4	43.2	44.9	46	48	-1.23901
138	846	B	10	1	109	111	84.1	96.69	82.4543	29.1	30.6	31.4	32.1	33.1	37.9	42	43.8	45.3	47.3	-1.41653
138	846	B	10	1	113	115	84.14	96.73	82.4866	30.2	31.7	32.8	33.3	34.1	38.7	42.5	44.1	45.3	47.3	-1.30269
138	846	B	10	1	117	119	84.18	96.77	82.5189	32.2	34	35.2	36.1	37.3	41.7	45.6	47	48.5	50.6	-1.0952
138	846	B	10	1	121	123	84.22	96.81	82.5512	32	33.9	35	36	37.3	41.9	45.8	47.5	48.9	50.7	-1.11663
138	846	B	10	1	125	127	84.26	96.85	82.584	31.6	33.1	34.1	34.9	36	40.5	44.3	45.7	47.1	49.6	-1.15888
138	846	B	10	1	129	131	84.3	96.89	82.6168	29.8	31.5	32.6	33.5	34.8	39.6	43.6	45.2	46.6	48.8	-1.3468
138	846	B	10	1	133	135	84.34	96.93	82.6496	26.1	27.6	29	30.1	31.8	37.5	42.1	43.9	45.4	48.1	-1.73244
138	846	B	10	1	137	139	84.38	96.97	82.6823	25.3	26.7	28	29.1	30.7	36.7	41.6	43.6	45.5	47.6	-1.81631
138	846	B	10	1	141	143	84.42	97.01	82.7151	28.1	29.7	31	31.9	33.3	39.1	43.6	45.8	47.3	49.7	-1.52557
138	846	B	10	1	145	147	84.46	97.07	82.7643	24.1	25.7	27.1	28.2	29.9	36.2	41.2	43.6	45.5	48	-1.94274
138	846	B	10	2	1	3	84.52	97.11	82.7979	29.9	31.4	32.7	33.6	35	40.5	45	46.9	48.5	51.1	-1.33982
138	846	B	10	2	5	7	84.56	97.15	82.8317	25.4	26.5	27.6	28.6	30.2	36	40.8	42.9	44.6	46.9	-1.8087
138	846	B	10	2	9	11	84.6	97.19	82.8655	24.3	25.3	26.4	27.2	28.5	34	38.6	40.5	41.9	44	-1.92379
138	846	B	10	2	13	15	84.64	97.23	82.8993	23.9	25.1	26.2	27	28.4	34	38.6	40.4	42	44.3	-1.96604
138	846	B	10	2	17	19	84.68	97.27	82.9331	24.2	25.4	26.6	27.5	29	34.8	39.4	41.3	42.8	45	-1.93544
138	846	B	10	2	21	23	84.72	97.31	82.9669	25.4	26.9	28.2	29	30.5	36.3	40.9	42.8	44.4	46.6	-1.81119
138	846	B	10	2	25	27	84.76	97.35	83.0007	25.1	26.5	27.7	28.5	29.9	36.1	40.9	43	44.8	47.1	-1.84303
138	846	B	10	2	29	31	84.8	97.39	83.0345	24.8	26	26.9	27.6	28.9	34.1	38.5	40.2	41.7	43.6	-1.87487
138	846	B	10	2	33	35	84.84	97.43	83.0683	25.3	26.3	27.2	27.7	28.7	33.5	37.5	39	40.3	42.3	-1.82346
138	846	B	10	2	37	39	84.88	97.47	83.1021	24.4	25.8	26.9	27.5	28.6	33.9	38.2	40	41.5	43.4	-1.91774
138	846	B	10	2	41	43	84.92	97.51	83.1359	23.5	24.9	26.1	26.7	27.9	33.6	38.1	40	41.4	43.4	-2.01201
138	846	B	10	2	45	47	84.96	97.55	83.1712	23.9	25.1	26	26.7	27.9	33.2	37.6	39.4	40.7	43	-1.97101
138	846	B	10	2	49	51	85	97.59	83.2067	24.6	25.7	26.8	27.4	28.5	33.5	37.8	39.5	40.7	43	-1.89879
138	846	B	10	2	53	55	85.04	97.63	83.2425	22.3	23.2	23.8	24.4	25.3	29.9	33.9	35.6	36.9	38.7	-2.13875
138	846	B	10	2	57	59	85.08	97.67	83.2792	22.8	23.8	24.6	25	25.9	30.6	34.8	36.3	37.4	39.6	-2.08734
138	846	B	10	2	61	63	85.12	97.71	83.3158	22.9	23.7	24.6	25	25.9	31	35.3	36.9	38.4	40.2	-2.07756
138	846	B	10	2	65	67	85.16	97.75	83.3525	22.2	23.6	24.4	24.9	25.8	31.4	35.9	37.3	38.9	40.6	-2.15102
138	846	B	10	2	69	71	85.2	97.79	83.3892	22.6	24	24.7	25.5	26.8	32.1	36.7	38.3	40	42.1	-2.11002
138	846	B	10	2	73	75	85.24	97.83	83.4259	23.7	24.6	25.6	26.2	27.5	32.6	36.9	38.6	39.8	42.5	-1.99618
138	846	B	10	2	77	79	85.28	97.87	83.4626	22.8	24.2	25	25.8	27.1	32.6	37	38.9	40.3	42.7	-2.09045
138	846	B	10	2	81	83	85.32	97.91	83.4993	22.2	23.4	24.5	25.3	26.7	32.4	36.9	38.6	40.4	43.1	-2.15351
138	846	B	10	2	85	87	85.36	97.95	83.5359	24.5	25.5	26.6	27.5	29	34.9	39.6	41.6	43.2	45.7	-1.9148
138	846	B	10	2	89	91	85.4	97.99	83.5726	26.6	28.1	29.2	29.8	30.6	35.5	39.8	41.4	42.3	44.4	-1.6969
138	846	B	10	2	93	95	85.44	98.03	83.6093	27.7	29.6	30.5	31	31.8	36.4	40.4	41.7	43.2	44.7	-1.58306
138	846	B	10	2	97	99	85.48	98.07	83.646	32.6	34.7	35.5	35.7	36.2	39.9	43.5	44.8	45.5	47.7	-1.07379
138	846	B	10	2	101	103	85.52	98.11	83.6827	37.5	39.3	39.9	40	40.4	43.7	47	48.1	48.7	50.7	-0.564529
138	846	B	10	2	105	107	85.56	98.15	83.7193	40.4	42.4	43.1	43.1	43.4	46.4	49.5	50.4	50.9	52.7	-0.263383
138	846	B	10	2	109	111	85.6	98.19	83.756	40.5	41.9	42.1	41.8	41.8	44.7	47.5	48.2	48.8	50.4	-0.253598
138	846	B	10	2	113	115	85.64	98.23	83.7927	48.1	49.2	49.3	48.9	48.6	51	53.6	54.4	55.1	57.1	0.536622
138	846	B	10	2	117	119	85.68	98.27	83.8297	36.8	38.3	39.2	39.4	40	44.4	48	49.5	50.5	52.6	-0.639859
138	846	B	10	2	121	123	85.72	98.31	83.867	49	50.5	50.6	49.8	49.1	51.3	53.9	54.7	55.1	56.9	0.62903
138	846	B	10	2	125	127	85.76	98.35	83.9042	49.1	50.1	49.8	49.1	48.4	50.5	53	53.8	54.9	55.9	0.638814
138	846	B	10	2	129	131	85.8	98.39	83.9415	48.1	49.1	48.8	48.2	47.4	49.7	52.1	53.2	53.6	56	0.534133
138	846	B	10	2	133	135	85.84	98.43	83.9788	50.8	51.5	51.3	50.3	49.3	51.2	53.5	54.4	54.9	56.4	0.814468
138	846	B	10	2	137	139	85.88	98.47	84.0161	47.4	48.4	48.2	47.6	47	49.1	51.6	52.2	52.9	54.1	0.460049
138	846	B	10	2	141	143	85.92	98.51	84.0534	51.1	51.8	51.4	50.5	49.6	51.4	53.9	54.6	55.1	56.7	0.844442
138	846	B	10	2	145	147	85.96	98.57	84.1093	46.3	47.2	47	46	45.2	47.3	49.8	50.7	51.3	52.9	0.344029
138	846	B	10	3	1	3	86.02	98.61	84.1466	45.4	46.5	46.3	45.5	44.8	47	49.7	50.6	51	52.9	0.249755
138	846	B	10	3	5	7	86.06	98.65	84.1839	44.5	45.3	45.3	44.6	43.9	46.3	49.2	49.8	50.8	52.3	0.15548
138	846	B	10	3	9	11	86.1	98.69	84.2211	46.3	46.9	46.5	45.6	44.9	47	49.5	50.4	51.2	52.8	0.342162
138	846	B	10	3	13	15	86.14	98.73	84.2584	47.6	48.8	48.7	48	47.2	49.3	51.9	52.7	53.1	54.6	0.476817
138	846	B	10	3	17	19	86.18	98.77	84.2957	46.4	47	46.9	46.3	45.7	47.9	50.7	51.7	52.5	54.1	0.351325
138	846	B	10	3	21	23	86.22	98.81	84.3329	49.9	50.5	50.2	49.4	48.6	50.5	53	53.9	54.3	56.4	0.714907
138	846	B	10	3	25	27	86.26	98.85	84.3702	48	48.8	48.8	48.3	47.8	50.1	52.8	53.5	54.1	55.9	0.516573
138	846	B	10	3	29	31	86.3	98.89	84.4074	47.6	49	49.3	49	49	51.4	54.3	55	55.5	57.8	0.474328
138	846	B	10	3	33	35	86.34	98.93	84.4447	48.1	49.6	49.9	49.7	49.8	52.2	55.2	55.9	56.5	57.8	0.525735
138	846	B	10	3	37	39	86.38	98.97	84.482	48.4	50.1	50.5	50.1	50.2	52.6	55.4	56.6	56.5	58.9	0.556331
138	846	B	10	3	41	43	86.42	99.01	84.5192	47.4	49.3	49.5	49.4	49.3	51.8	54.6	55.4	55.7	58.1	0.45165
138	846	B	10	3	45	47	86.46	99.05	84.5565	48.4	50	50.3	49.8	49.4	51.8	54.3	55.1	55.3	56.8	0.555086
138	846	B	10	3	49	51	86.5	99.09	84.5938	44.3	46.2	46.7	46.5	46.7	49.6	52.5	53.3	54.1	56	0.127825
138	846	B	10	3	53	55	86.54	99.13	84.6304	44.5	45.7	46	45.9	46	48.9	51.8	52.8	53.7	55.7	0.148014
138	846	B	10	3	57	59	86.58	99.17	84.6671	43	44.3	44.4	44.2	44	46.8	49.7	50.5	51.2	53	-0.00869454
138	846	B	10	3	61	63	86.62	99.21	84.7038	43.4	45	45.4	45.2	45.2	48.1	51	52	52.6	54.6	0.0323065
138	846	B	10	3	65	67	86.66	99.25	84.7405	45.2	46.4	46.7	46.3	46.1	48.8	51.7	52.4	53	54.7	0.218988
138	846	B	10	3	69	71	86.7	99.29	84.7772	42.9	44.3	44.8	44.6	44.7	47.9	51	52.1	52.9	54.3	-0.0209669
138	846	B	10	3	73	75	86.74	99.33	84.8138	46	47.2	47.4	47	46.9	49.5	52.5	53.3	54.1	56.3	0.300992
138	846	B	10	3	77	79	86.78	99.37	84.8505	47.1	48.2	48.2	47.7	47.4	50	52.7	53.5	54.4	56.2	0.414834
138	846	B	10	3	81	83	86.82	99.41	84.8872	44.8	45.9	46.2	45.8	45.6	48.3	51.1	52	52.9	54.8	0.174877
138	846	B	10	3	85	87	86.86	99.45	84.9239	46.9	48.5	48.6	48.1	47.9	50.4	53	54.1	54.6	56.2	0.392777
138	846	B	10	3	89	91	86.9	99.49	84.9606	43.9	45	45.4	44.6	44.1	46.6	49.4	50.4	50.7	52.5	0.0799805
138	846	B	10	3	93	95	86.94	99.53	84.9973	43.5	44.9	45.1	44.4	44	46.4	49.2	50.1	50.5	52.9	0.037735
138	846	B	10	3	97	99	86.98	99.57	85.0339	43.6	45.5	45.6	44.9	44.5	46.7	49.7	50.3	51	52.1	0.0475182
138	846	B	10	3	101	103	87.02	99.61	85.0706	44.3	46.2	46.2	45.4	44.7	46.9	49.6	50.2	50.6	52	0.119737
138	846	B	10	3	105	107	87.06	99.65	85.1073	41.3	42.7	42.8	42.2	41.7	44.1	47	47.7	48.2	50.2	-0.193059
138	846	B	10	3	109	111	87.1	99.69	85.144	41.6	43.2	43.3	42.7	42.1	44.6	47.4	48.2	48.8	50.1	-0.162464
138	846	B	10	3	113	115	87.14	99.73	85.1807	41.2	42.8	43	42.4	41.9	44.4	47.3	48.1	48.5	50.1	-0.20471
138	846	B	10	3	117	119	87.18	99.77	85.2173	36	37.4	37.8	37.6	37.6	40.7	43.9	44.9	45.6	47.4	-0.746435
138	846	B	10	3	121	123	87.22	99.81	85.254	36	37.7	37.9	37.5	37.5	40.4	43.6	44.7	45.5	47	-0.747057
138	846	B	10	3	125	127	87.26	99.85	85.2907	34.5	35.9	36.1	35.8	35.8	38.8	42.1	43.1	43.9	45.6	-0.903767
138	846	B	10	3	129	131	87.3	99.89	85.3274	34.9	36.5	36.9	36.7	36.6	39.6	43	43.9	44.5	46.2	-0.862765
138	846	B	10	3	133	135	87.34	99.93	85.364	36.9	37.9	38	37.7	37.7	40.7	43.8	44.9	45.6	47.8	-0.655271
138	846	B	10	3	137	139	87.38	99.97	85.4007	41.4	43.3	43.7	43.4	43.2	46.2	49.3	50.3	51.3	52.8	-0.187631
138	846	B	10	3	141	143	87.42	100.01	85.4374	42.5	43.8	44	43.8	43.6	46.3	49.2	50.3	51.1	52.7	-0.0737889
138	846	B	10	3	145	147	87.46	100.07	85.4924	41.9	43.3	43.5	42.9	42.7	45.4	48.3	49.2	50.1	51.7	-0.137157
138	846	B	10	4	1	3	87.52	100.11	85.5291	43.2	44.8	45.1	44.8	44.6	47.3	50.3	51.2	51.8	53.9	-0.00250286
138	846	B	10	4	5	7	87.56	100.15	85.5658	42.3	43.5	43.8	43.6	43.7	46.5	49.6	50.8	51.9	53.5	-0.0967773
138	846	B	10	4	9	11	87.6	100.19	85.6024	40.9	41.6	41.9	41.6	41.8	44.7	47.8	49.1	50	52	-0.243082
138	846	B	10	4	13	15	87.64	100.23	85.6391	49.5	50.3	50.3	50.1	50.2	52.8	55.4	56.7	57.8	59.5	0.651198
138	846	B	10	4	17	19	87.68	100.27	85.6758	45.9	47	47.1	47	47.2	50	53.1	54.3	55.3	57.2	0.275966
138	846	B	10	4	21	23	87.72	100.31	85.7125	55.5	55.7	55.4	54.8	54.4	56.3	58.8	59.7	60.6	62.6	1.2743
138	846	B	10	4	25	27	87.76	100.35	85.7491	54.1	55.1	55	54.3	53.8	55.5	58	58.7	59.3	60.7	1.128
138	846	B	10	4	29	31	87.8	100.39	85.7839	58.7	59.7	59.5	59.1	58.7	60.5	62.9	63.7	64.3	65.8	1.60605
138	846	B	10	4	33	35	87.84	100.43	85.8183	56.4	57.6	57.6	57	56.6	58.3	60.7	61.4	61.8	63.5	1.36609
138	846	B	10	4	37	39	87.88	100.47	85.8527	54.4	55.8	56	55.8	55.6	57.7	60.2	61	61.8	63.7	1.15735
138	846	B	10	4	41	43	87.92	100.51	85.887	50.1	51.5	51.8	51.8	51.8	54.5	57.3	58.3	59.1	60.6	0.709278
138	846	B	10	4	45	47	87.96	100.55	85.9214	47.9	49.3	49.8	49.5	49.3	51.8	54.5	55.5	56.5	58.1	0.479727
138	846	B	10	4	49	51	88	100.59	85.9558	43.6	44.7	45.1	45	45.2	48.4	51.5	52.8	54.1	56	0.0316543
138	846	B	10	4	53	55	88.04	100.63	85.9901	40.3	41.9	42.6	42.7	43.2	46.6	49.9	51.2	52.5	54.6	-0.31236
138	846	B	10	4	57	59	88.08	100.67	86.0245	38.6	40	40.6	40.8	41.2	44.5	47.8	49.1	50.2	52.2	-0.489881
138	846	B	10	4	61	63	88.12	100.71	86.0588	38.1	39.4	40	40.2	40.7	44.3	47.6	49	50	52.1	-0.542532
138	846	B	10	4	65	67	88.16	100.75	86.0932	33.2	34.7	35.4	35.8	36.7	41.1	44.9	46.4	47.7	49.8	-1.05304
138	846	B	10	4	69	71	88.2	100.79	86.1276	33.4	34.6	35.3	35.6	36.3	40.4	44.1	45.4	46.7	48.9	-1.03285
138	846	B	10	4	73	75	88.24	100.83	86.1619	33.7	35.1	36.1	36.4	37.2	41.3	45	46.5	47.6	49.6	-1.00226
138	846	B	10	4	77	79	88.28	100.87	86.1963	33.2	34.8	35.5	35.8	36.4	40.3	44	45.4	46.3	48.9	-1.05491
138	846	B	10	4	81	83	88.32	100.91	86.2307	38	39.3	39.8	39.7	39.9	42.9	46.2	47.2	48.2	49.9	-0.556049
138	846	B	10	4	85	87	88.36	100.95	86.265	37.6	38.9	39.2	38.8	38.6	41.4	44.5	45.6	46.3	48.3	-0.598295
138	846	B	10	4	89	91	88.4	100.99	86.2994	39.7	40.8	41.1	40.8	40.6	43.3	46.3	47.4	48.1	50	-0.380394
138	846	B	10	4	93	95	88.44	101.03	86.334	35.5	37.1	37.8	38.1	38.6	42.3	45.8	47.2	48.3	50.3	-0.818061
138	846	B	10	4	97	99	88.48	101.07	86.3709	31.2	32.4	33.2	33.7	34.6	38.6	42.3	43.8	44.9	47.1	-1.26613
138	846	B	10	4	101	103	88.52	101.11	86.4082	27.3	28.8	29.7	30.6	31.9	36.9	41.2	43.1	44.7	47.2	-1.67258
138	846	B	10	4	105	107	88.56	101.15	86.4455	25.6	26.8	27.9	28.9	30.6	36.3	40.9	43.1	45	47.4	-1.8501
138	846	B	10	4	109	111	88.6	101.19	86.4828	25.1	26.3	27.4	28.4	29.9	35.8	40.5	42.8	44.7	47.2	-1.90276
138	846	B	10	4	113	115	88.64	101.23	86.5201	26.4	27.6	28.7	29.7	31.3	36.7	41.3	43.3	44.9	47.6	-1.7681
138	846	B	10	4	117	119	88.68	101.27	86.5574	28.5	29.8	31	32	33.6	39.1	43.6	45.6	47.2	49.7	-1.5502
138	846	B	10	4	121	123	88.72	101.31	86.5947	27.5	28.9	30.2	31.2	32.9	38.8	43.5	45.7	47.5	50.3	-1.65488
138	846	B	10	4	125	127	88.76	101.35	86.632	25.8	27.2	28.5	29.6	31.3	37.4	42.3	44.6	46.6	49.6	-1.8324
138	846	B	10	4	129	131	88.8	101.39	86.6693	28.2	29.6	31.1	32.2	33.9	39.6	44.3	46.4	48.2	50.8	-1.58329
138	846	B	10	4	133	135	88.84	101.43	86.7067	29.5	31.2	32.4	33.4	34.7	40.2	44.6	46.5	48.2	50.5	-1.44863
138	846	B	10	4	137	139	88.88	101.47	86.7439	27	28.6	29.8	30.7	32.1	38	42.6	44.8	46.6	49	-1.7094
138	846	B	10	4	141	143	88.92	101.51	86.7812	35.2	36.9	37.9	38.5	39.3	43.8	47.5	49	50.3	52.3	-0.856744
138	846	B	10	4	145	147	88.96	101.57	86.837	34.2	35.8	36.9	37.5	38.4	43.4	47.5	49.2	50.6	53.3	-0.961736
138	846	B	10	5	1	3	89.02	101.61	86.8742	43.1	44.8	45.6	45.9	46.2	49.7	53.2	54.5	55.3	57.8	-0.0362385
138	846	B	10	5	5	7	89.06	101.65	86.9115	49.9	51.7	52.2	52.5	52.9	55.9	59	60.3	61.3	63.4	0.670735
138	846	B	10	5	9	11	89.1	101.69	86.9487	47.6	48.6	49	49.2	49.5	52.5	55.4	56.4	58	60.3	0.43078
138	846	B	10	5	13	15	89.14	101.73	86.9859	48.3	49.4	49.9	49.8	49.9	52.9	55.6	56.9	57.9	60.1	0.502999
138	846	B	10	5	17	19	89.18	101.77	87.0232	44.8	45.9	46.5	46.6	46.8	50.4	53.8	55	56	58.4	0.138172
138	846	B	10	5	21	23	89.22	101.81	87.0604	48	49.4	49.9	50	50.2	53.2	56.3	57.5	58.6	60.6	0.470537
138	846	B	10	5	25	27	89.26	101.85	87.0976	49.7	51.1	51.3	51	51	53.8	56.5	57.4	58.6	61.4	0.646814
138	846	B	10	5	29	31	89.3	101.89	87.1352	45.6	47.2	47.9	47.7	47.9	51.2	54.3	55.6	56.7	59.3	0.219552
138	846	B	10	5	33	35	89.34	101.93	87.1736	46.9	48.2	48.3	48	47.9	50.7	53.4	54.9	55.5	58.2	0.354207
138	846	B	10	5	37	39	89.38	101.97	87.212	44.4	44.8	44.6	44.3	44.2	46.9	50.1	51.3	52.1	54.9	0.0934389
138	846	B	10	5	41	43	89.42	102.01	87.2504	43.3	44.1	44.3	43.8	43.6	46.1	49.1	50.3	51.1	53.5	-0.0216478
138	846	B	10	5	45	47	89.46	102.05	87.2888	43.4	44.2	44.4	43.9	43.7	46.3	49.3	50.5	51.3	53.3	-0.0118646
138	846	B	10	5	49	51	89.5	102.09	87.3272	44.6	45	44.7	44	43.4	45.5	48.4	49.4	50.2	52.5	0.112383
138	846	B	10	5	53	55	89.54	102.13	87.3656	44.4	45.1	45	44.2	43.6	45.7	48.5	49.4	50.3	52.2	0.0909497
138	846	B	10	5	57	59	89.58	102.17	87.4042	43.7	43.9	43.7	42.9	42.3	44.5	47.4	48.4	49.4	51.2	0.0174864
138	846	B	10	5	61	63	89.62	102.21	87.4427	45.1	45.6	45.2	44.3	43.6	45.9	48.6	49.6	50.4	52.6	0.162546
138	846	B	10	5	65	67	89.66	102.25	87.4813	47.7	47.6	47.1	46.4	45.7	47.9	50.7	51.7	52.8	55	0.432476
138	846	B	10	5	69	71	89.7	102.29	87.5198	50	50.1	49.6	49	48.4	50.5	53.1	54.4	55.4	57.6	0.671188
138	846	B	10	5	73	75	89.74	102.33	87.5584	49.6	50.1	49.8	49.3	49	51.4	54.1	55.2	56.3	58.5	0.628943
138	846	B	10	5	77	79	89.78	102.37	87.5969	42.7	43.5	43.6	43.4	43.3	46.6	50	51.3	52.5	54.7	-0.0896815
138	846	B	10	5	81	83	89.82	102.41	87.6354	42.5	43.1	43.3	42.9	42.9	45.8	48.9	50.3	51.3	53.8	-0.111116
138	846	B	10	5	85	87	89.86	102.45	87.6738	50.4	51.3	51.2	50.3	49.3	51.1	53.6	54.6	54.9	56.9	0.710322
138	846	B	10	5	89	91	89.9	102.49	87.7122	47.9	48.4	48.2	47.8	47.3	49.7	52.5	53.6	54.6	56.7	0.449555
138	846	B	10	5	93	95	89.94	102.53	87.7506	49.6	51.3	51.3	51.3	51.3	54.3	57.3	58.4	59.4	61.6	0.625832
138	846	B	10	5	97	99	89.98	102.57	87.789	52	53.2	53.1	53.1	52.8	55.4	58.3	59.2	60.3	62.3	0.87495
138	846	B	10	5	101	103	90.02	102.61	87.8275	50.3	51	50.9	50.4	50.1	52.1	55	55.9	57	58.9	0.697429
138	846	B	10	5	105	107	90.06	102.65	87.8654	47.5	48.1	48	47.6	47.4	49.9	52.7	53.8	54.8	57.2	0.405443
138	846	B	10	5	109	111	90.1	102.69	87.9027	43.3	44.2	44.3	44.2	44.4	47.5	50.7	52	53.1	56.1	-0.0322242
138	846	B	10	5	113	115	90.14	102.73	87.9401	41	41.1	41.3	41	41.1	43.9	47.1	48.6	49.8	52.3	-0.272181
138	846	B	10	5	117	119	90.18	102.77	87.9774	37.9	38.4	38.3	38	38	40.9	44	45.2	46.7	48.6	-0.595383
138	846	B	10	5	121	123	90.22	102.81	88.0147	36.8	37.9	38.2	38.1	38.1	41.3	44.6	45.8	46.8	49.4	-0.710469
138	846	B	10	5	125	127	90.26	102.85	88.052	37.2	38.4	39	39.1	39.4	42.6	46.1	47.5	48.5	51.3	-0.669468
138	846	B	10	5	129	131	90.3	102.89	88.0893	37.8	39.2	39.8	39.9	40.4	44.2	47.7	49.2	50.7	53	-0.607655
138	846	B	10	5	133	135	90.34	102.93	88.1266	35.4	36.2	36.6	36.6	36.8	40.1	43.6	44.9	46.2	48.5	-0.858017
138	846	B	10	5	137	139	90.38	102.97	88.164	33.4	34.3	34.5	34.5	34.9	38.3	41.8	43.1	44.6	46.9	-1.06676
138	846	B	10	5	141	143	90.42	103.01	88.2013	34.2	35.7	36.5	36.8	37.5	41.4	45.1	46.6	47.7	50.5	-0.984132
138	846	B	10	5	145	147	90.46	103.07	88.2565	31.2	32.3	32.9	33.3	34.2	38.2	42	43.7	45.1	47.5	-1.29724
138	846	B	10	6	1	3	90.52	103.11	88.2904	31	31.9	32.9	33.4	34.7	39.2	43.4	45.1	46.7	49.3	-1.31867
138	846	B	10	6	5	7	90.56	103.15	88.3241	31.7	32.9	33.9	34.5	35.6	40.1	44.2	46	47.6	49.7	-1.24645
138	846	B	10	6	9	11	90.6	103.19	88.3579	28.6	29.6	30.4	31	31.9	36.4	40.5	42.3	43.8	46.5	-1.56966
138	846	B	10	6	13	15	90.64	103.23	88.3917	28.4	29.5	30.5	31	32	36.5	40.6	42.3	43.9	46.4	-1.59109
138	846	B	10	6	17	19	90.68	103.27	88.4254	29.5	30.9	31.9	32.3	33.4	38.1	42.1	44	45.5	47.7	-1.47725
138	846	B	10	6	21	23	90.72	103.31	88.4592	29.6	30.7	31.4	31.8	32.5	36.8	40.5	42.1	43.7	45.9	-1.46747
138	846	B	10	6	25	27	90.76	103.35	88.4929	28.2	29.1	29.9	30.4	31.2	35.8	39.9	41.4	43.1	45.9	-1.61377
138	846	B	10	6	29	31	90.8	103.39	88.5267	27.8	28.4	29.1	29.7	30.5	34.8	38.7	40.3	41.6	44.5	-1.65601
138	846	B	10	6	33	35	90.84	103.43	88.5605	29.3	30.5	31.2	31.6	32	36.1	39.9	41.2	42.8	44.4	-1.50055
138	846	B	10	6	37	39	90.88	103.47	88.5942	31	32	32.6	32.8	33.1	36.9	40.6	42	43	45.7	-1.32427
138	846	B	10	6	41	43	90.92	103.51	88.628	33.9	34.7	35	34.7	34.7	37.8	41.3	42.4	43.5	45.8	-1.02312
138	846	B	10	6	45	47	90.96	103.55	88.6609	38.5	39.4	39.5	39	38.8	41.6	44.8	45.9	46.8	48.7	-0.54508
138	846	B	10	6	49	51	91	103.59	88.6938	41.6	41.7	41.6	41.1	40.8	43.4	46.3	47.4	48.8	51	-0.223121
138	846	B	10	6	53	55	91.04	103.63	88.7267	45.7	46.4	46.3	45.6	45.1	47.3	50.2	51.1	51.8	53.9	0.202896
138	846	B	10	6	57	59	91.08	103.67	88.7595	50.7	51.1	50.6	49.8	49.2	51.1	53.7	54.8	55.8	57.6	0.722566
138	846	B	10	6	61	63	91.12	103.71	88.7924	43	43.9	43.8	43.2	42.9	45.7	48.8	49.8	50.9	53.1	-0.0793059
138	846	B	10	6	65	67	91.16	103.75	88.8252	55.1	56.1	55.6	54.1	52.8	54.1	56.5	57.4	58	59.5	1.17918
138	846	B	10	6	69	71	91.2	103.79	88.858	54	54.6	54	52.8	51.6	53.2	55.6	56.6	57.3	59.1	1.06409
138	846	B	10	6	73	75	91.24	103.83	88.8902	50.8	51.5	50.8	49.4	48.1	49.4	51.9	52.8	53.6	55.2	0.730482
138	846	B	10	6	77	79	91.28	103.87	88.9225	44.8	45.5	45.1	43.9	43	45	47.8	48.8	49.6	51.3	0.10551
138	846	B	10	6	81	83	91.32	103.91	88.9547	40.1	40.1	40	39.3	39.2	42	45.2	46.6	47.9	50.5	-0.384185
138	846	B	10	6	85	87	91.36	103.95	88.9869	45.9	45.8	45.3	44.2	43.7	45.7	48.6	49.7	50.9	53.2	0.21873
138	846	B	10	6	89	91	91.4	103.99	89.0191	51	51.7	51.2	50	49.1	50.8	53.4	54.4	55.1	57.1	0.748805
138	846	B	10	6	93	95	91.44	104.03	89.0513	48	48.3	47.8	46.7	45.9	47.9	50.5	51.5	52.7	54.7	0.436009
138	846	B	10	6	97	99	91.48	104.07	89.0832	51.3	51.6	50.9	49.6	48.5	50.1	52.6	53.4	54.2	56.2	0.77878
138	846	B	10	6	101	103	91.52	104.11	89.1151	48.4	48.5	47.6	46.5	45.5	47.2	49.9	50.9	52	53.7	0.476388
138	846	B	10	6	105	107	91.56	104.15	89.147	48.4	48.9	48.2	46.9	45.8	47.5	50.1	51	51.8	53.6	0.475765
138	846	B	10	6	109	111	91.6	104.19	89.1789	49.5	49.9	49.2	48.1	47.1	48.7	51.3	52.2	52.9	55.1	0.589608
138	846	B	10	6	113	115	91.64	104.23	89.2108	51.2	51.9	51.7	50.9	50.2	52.3	55	56.1	56.9	59	0.765885
138	846	B	10	6	117	119	91.68	104.27	89.2429	54.3	55.1	54.7	53.7	52.8	54.5	57	57.8	58.6	60.6	1.08784
138	846	B	10	6	121	123	91.72	104.31	89.2749	52.4	52.8	52.4	51.4	50.7	52.6	55.1	56.1	57	59.3	0.889511
138	846	B	10	6	125	127	91.76	104.35	89.307	51.6	52	51.6	50.6	49.7	51.5	54.1	54.9	55.8	58.1	0.805642
138	846	B	10	6	129	131	91.8	104.39	89.339	53.5	54.1	53.8	52.8	52.2	54	56.6	57.5	58.4	60.5	1.00273
138	846	B	10	6	133	135	91.84	104.43	89.3711	48.8	49.4	49.3	48.8	48.6	51.2	54.3	55.5	56.5	58.8	0.513034
138	846	B	10	6	137	139	91.88	104.47	89.403	48.7	49.4	49.4	48.7	48.2	50.8	53.6	54.8	55.8	57.9	0.502006
138	846	B	10	6	141	143	91.92	104.51	89.4349	56.1	56.6	56.3	55.5	54.8	56.7	59.2	60.2	60.8	62.8	1.27142
138	846	B	10	6	145	147	91.96	104.57	89.4828	53.8	53.8	53.3	52.3	51.5	53.4	55.8	56.9	57.8	60.2	1.03115
138	846	B	10	7	1	3	92.02	104.61	89.5147	50.3	50.6	50.1	49.1	48.2	50.2	52.7	53.6	54.3	56.8	0.666322
138	846	B	10	7	5	7	92.06	104.65	89.5466	51.9	52.7	52.4	51.4	50.6	52.5	55.1	55.9	56.6	58.9	0.832193
138	846	B	10	7	9	11	92.1	104.69	89.5785	50.7	51.6	51.4	50.5	49.7	51.8	54.4	55.2	55.8	58	0.706702
138	846	B	10	7	13	15	92.14	104.73	89.6104	50.2	50.8	50.6	49.5	48.8	50.7	53.4	54.3	55.2	57.1	0.65405
138	846	B	10	7	17	19	92.18	104.77	89.6424	44.4	44.7	44.4	43.4	42.7	44.9	47.8	48.8	49.7	52	0.0498901
138	846	B	10	7	21	23	92.22	104.81	89.6743	45.2	46	46	45.4	44.9	47.8	50.8	52	52.7	54.8	0.132514
138	846	B	10	7	25	27	92.26	104.85	89.7062	41.9	43	43.2	42.7	42.5	45.9	49.2	50.5	51.8	54.2	-0.2115
138	846	B	10	7	29	31	92.3	104.89	89.7378	42.8	43.9	43.9	43.2	42.8	45.7	48.7	49.8	50.8	53	-0.11847
138	846	B	10	7	33	35	92.34	104.93	89.7693	39.7	40.8	40.9	40.3	39.9	43	46.2	47.4	48.5	51	-0.441672
138	846	B	10	7	37	39	92.38	104.97	89.8008	41	41.6	41.3	40.3	39.6	42	44.9	46	47	49.2	-0.307019
138	846	B	10	7	41	43	92.42	105.01	89.8323	42	42.8	42.6	41.6	40.9	43.2	46.2	47.1	47.9	50	-0.203582
138	846	B	10	7	45	47	92.46	105.05	89.8638	39.3	40.2	40.3	39.7	39.5	42.7	46	47.2	48.2	50.4	-0.485162
138	846	B	10	7	49	51	92.5	105.09	89.8955	39.5	40.9	41.1	40.6	40.3	43.5	46.8	48	49.1	51.5	-0.464972
138	846	B	10	7	53	55	92.54	105.13	89.9272	44	45.7	46.1	45.8	45.7	49	52.2	53.5	54.4	56.5	0.00266747
138	846	B	10	7	57	59	92.58	105.17	89.9589	40.5	42	42.5	42.2	42.3	46.2	49.7	51.1	52.2	54.3	-0.362159
138	846	B	10	7	61	63	92.62	105.21	89.9906	54.5	55.7	55.6	54.8	54.5	56.5	59	60	60.8	63	1.09404
138	846	B	10	7	65	67	92.66	105.25	90.0222	50.4	51	51	50.3	50	52.4	55.1	56.2	57.4	59.9	0.666775
138	846	B	10	7	69	71	92.7	105.29	90.0537	55	56.1	56	55.3	54.9	57	59.6	60.5	61.5	63.6	1.14482
138	846	B	10	7	73	75	92.74	105.33	90.0852	57.6	58.5	58.3	57.6	57.1	58.9	61.3	62.2	62.9	65	1.41475
138	846	B	10	7	77	79	92.78	105.37	90.1167	54	55.1	55.1	54.6	54.3	56.7	59.4	60.4	61.5	63.7	1.03952
138	846	B	10	7	81	83	92.82	105.41	90.1483	55	56.7	56.7	56.3	56	58.5	61	62.3	62.9	65.5	1.14295
138	846	D	10	5	81	83	94.12	105.42	90.18	42.5	45.6	46.4	45.9	45.2	47.3	49.4	49.2	48	47.5	0.878503
138	846	B	10	7	85	87	92.86	105.45	90.18	50.1	51.3	51.6	51.8	52	54.9	57.8	59.3	60.6	62.8	0.632447
138	846	B	10	7	89	91	92.9	106.02	90.2119	46.9	47.8	48	47.9	48	50.6	53.5	54.8	56	58.2	0.290595
138	846	D	10	5	89	91	94.2	105.5	90.243	45.2	48.4	49.4	49.5	49.4	51.4	53.4	53.6	52.7	51.8	1.18472
138	846	D	10	5	97	99	94.28	105.58	90.3037	39.6	42.9	43.8	44	44.3	46.7	49.1	49.2	48.9	48.2	0.541939
138	846	D	10	5	105	107	94.36	105.66	90.3647	40.6	43.6	45	45.6	46	48.6	51.1	51.4	50.9	50.1	0.653783
138	846	D	10	5	113	115	94.44	105.74	90.4251	40	44.1	45.8	46.5	47.3	50.6	53.1	53.4	53.3	52.3	0.582687
138	846	D	10	5	121	123	94.52	105.82	90.4863	33.5	37.1	39	39.8	41	45.5	48.7	49.6	49.4	49.5	-0.162996
138	846	D	10	5	129	131	94.6	105.9	90.5474	36.2	40.2	41.7	42.6	43.3	47	49.7	50.1	50.2	49.2	0.14322
138	846	D	10	5	137	139	94.68	105.98	90.6098	37.1	40.4	42.2	42.7	43.6	46.8	49.6	50	49.9	49.1	0.243631
138	846	D	10	5	145	147	94.76	106.06	90.6722	33.7	37.9	39.6	40.7	41.6	45.4	48.3	49.1	48.6	48.4	-0.147608
138	846	D	10	6	1	3	94.82	106.12	90.7182	33.3	36.9	38.8	39.8	40.9	44.7	47.6	48.2	48.1	48.2	-0.195213
138	846	D	10	6	9	11	94.9	106.2	90.7804	29.4	33.1	35	36.1	37.6	42.4	45.9	46.7	46.3	46	-0.64362
138	846	D	10	6	17	19	94.98	106.28	90.8426	28.8	32.4	34.4	35.6	37.1	41.9	45.2	45.9	45.9	46	-0.714716
138	846	D	10	6	25	27	95.06	106.36	90.904	27	30.6	32.7	34.1	35.5	40.4	43.9	45	45.3	45.1	-0.923016
138	846	D	10	6	33	35	95.14	106.44	90.9694	24.4	27.7	29.6	30.9	32.6	38	41.8	43	43.4	43.5	-1.22278
138	846	B	11	1	13	15	92.64	106.18	91.035	39.9	41.4	42.3	43.1	44.3	49.2	53	54.7	56.4	58.9	-0.440303
138	846	D	10	6	41	43	95.22	106.52	91.0494	23.1	26.2	28.1	29.5	31.1	36.3	39.9	41	41.1	41.3	-1.37392
138	846	B	11	1	17	19	92.68	106.22	91.0734	31.4	32.9	34.1	35.2	36.9	42.8	47.3	49.5	51.5	54.7	-1.32542
138	846	B	11	1	21	23	92.72	106.26	91.1118	27.6	28.8	29.9	31	32.7	38.9	43.8	46.1	48.1	51.2	-1.72146
138	846	B	11	1	25	27	92.76	106.3	91.1503	26.9	28.1	29.4	30.4	32.2	38.4	43.4	45.7	48.2	51.6	-1.79493
138	846	B	11	1	29	31	92.8	106.34	91.1887	30.4	31.6	32.5	33.6	35.2	40.9	45.5	47.6	49.8	52.7	-1.43134
138	846	B	11	1	33	35	92.84	106.38	91.2272	29.4	30.4	31.4	32.2	33.9	39.7	44.4	46.8	48.7	52	-1.53602
138	846	B	11	1	37	39	92.88	106.42	91.2664	29.2	30.4	31.7	32.5	33.9	40.1	44.7	46.9	49.1	51.9	-1.55746
138	846	B	11	1	41	43	92.92	106.46	91.3056	32.5	33.4	34.5	35.4	36.8	42	46.4	48.4	50.3	53.1	-1.21469
138	846	B	11	1	45	47	92.96	106.5	91.3448	33.8	35.3	36.1	37	38.3	43.4	47.4	49.5	50.9	54.4	-1.08003
138	846	B	11	1	49	51	93	106.54	91.3839	37.4	38.7	39.6	40.7	42.2	47.1	51.3	53.2	55	58.1	-0.706047
138	846	B	11	1	53	55	93.04	106.58	91.4231	38.5	40	40.8	41.8	43.2	47.9	51.9	53.7	55.6	58.3	-0.592205
138	846	B	11	1	57	59	93.08	106.62	91.4625	37.5	38.8	39.9	40.9	42.3	47.2	51.3	52.9	54.7	57.9	-0.696885
138	846	B	11	1	61	63	93.12	106.66	91.5019	37.5	39.1	40.3	41.3	42.9	48.2	52.5	54.5	56.3	59.2	-0.697507
138	846	B	11	1	65	67	93.16	106.7	91.5413	37.5	38.9	39.9	40.8	42.2	47.2	51.3	53.3	55.3	58.3	-0.69813
138	846	B	11	1	69	71	93.2	106.74	91.5807	37.1	38.9	40	41	42.5	48.2	52.5	54.6	56.5	59.6	-0.740375
138	846	B	11	1	73	75	93.24	106.78	91.6203	36.8	38.1	39.2	40.1	41.6	46.6	50.7	52.8	54.4	57.9	-0.772214
138	846	B	11	1	77	79	93.28	106.82	91.6608	38.5	40.1	40.9	42.1	43.7	48.8	52.9	54.9	56.8	59.8	-0.595938
138	846	B	11	1	81	83	93.32	106.86	91.7014	38	39.4	40.7	41.7	43.4	48.5	52.7	54.7	56.4	59.5	-0.648589
138	846	B	11	1	85	87	93.36	106.9	91.7419	36	37.9	39.2	40.3	42.2	47.8	52.3	54.6	56.3	59.1	-0.857328
138	846	B	11	1	89	91	93.4	106.94	91.7829	34.5	35.8	36.7	37.6	39	44.3	48.5	50.4	52.6	55.4	-1.01404
138	846	B	11	1	93	95	93.44	106.98	91.8243	33.1	34.1	34.9	35.7	37.2	42.5	46.6	48.7	51	53.8	-1.16034
138	846	B	11	1	97	99	93.48	107.02	91.8656	32.6	33.9	34.7	35.4	36.7	41.4	45.4	47.5	49.3	52.1	-1.21299
138	846	B	11	1	101	103	93.52	107.06	91.9071	35.2	36.3	37.2	37.8	38.9	43.6	47.5	49.2	51	54.2	-0.943062
138	846	B	11	1	105	107	93.56	107.1	91.9488	36.2	37.7	38.9	39.7	41	45.8	49.8	51.6	53.6	56.3	-0.839627
138	846	B	11	1	109	111	93.6	107.14	91.9905	37.7	39.4	40.4	41.1	42.2	46.6	50.4	52.1	53.8	56.1	-0.684161
138	846	B	11	1	113	115	93.64	107.18	92.0321	35.6	37.2	38.2	39.2	40.6	45.6	49.7	51.5	53.1	56.1	-0.903306
138	846	B	11	1	117	119	93.68	107.22	92.0735	33.9	35.2	36.2	37.1	38.6	43.8	48.3	50.4	52.3	55.1	-1.08083
138	846	B	11	1	121	123	93.72	107.26	92.1148	33.7	35.2	36.3	37.2	38.7	43.9	48.3	50.1	51.7	54.4	-1.10226
138	846	B	11	1	125	127	93.76	107.3	92.1561	37.8	38.9	39.9	40.7	41.8	46.2	50.1	51.7	53.2	56.5	-0.676244
138	846	B	11	1	129	131	93.8	107.34	92.1966	37	38.4	39.3	39.8	41	45.7	49.6	51.4	53	55.2	-0.760113
138	846	B	11	1	133	135	93.84	107.38	92.2371	40.2	41.2	41.8	42.1	42.7	46.7	50.1	51.6	52.8	55.2	-0.427748
138	846	B	11	1	137	139	93.88	107.42	92.2776	44.4	46.2	46.8	47.1	47.6	51.2	54.5	55.8	57.1	59.1	0.00867459
138	846	B	11	1	141	143	93.92	107.46	92.3176	45.9	46.9	47.2	47.2	47.4	50.5	53.6	54.9	55.7	58.4	0.16414
138	846	B	11	1	145	147	93.96	107.52	92.3767	50	50.7	51.1	51	51.1	54.1	57.1	58.3	59.6	62.1	0.589846
138	846	B	11	2	1	3	94.02	107.56	92.4161	52.1	52.9	53.1	53	53.2	56	59.1	60.3	61.4	63.7	0.807746
138	846	B	11	2	5	7	94.06	107.6	92.4555	50.9	52.3	52.8	52.6	52.6	55.5	58.5	59.7	60.9	63	0.682255
138	846	B	11	2	9	11	94.1	107.64	92.4946	48.9	50.5	51	50.8	50.9	54.1	57.2	58.4	59.4	61.6	0.473516
138	846	B	11	2	13	15	94.14	107.68	92.533	47.7	48.7	48.9	48.7	48.7	51.8	55	56.2	57.5	59.8	0.348024
138	846	B	11	2	17	19	94.18	107.72	92.5714	51.3	52.4	52.6	52.4	52.4	55.1	58.1	59.2	60.2	62.7	0.722011
138	846	B	11	2	21	23	94.22	107.76	92.6098	48.4	48.5	48.6	48.1	47.9	50.7	53.6	54.8	56.4	58.4	0.41962
138	846	B	11	2	25	27	94.26	107.8	92.6483	51.7	52.7	52.9	52.7	52.8	56	58.9	60.2	61.9	64	0.76239
138	846	B	11	2	29	31	94.3	107.84	92.6867	50.1	51.5	51.3	51	51.2	54.2	57.2	58.5	60	62.5	0.595274
138	846	B	11	2	33	35	94.34	107.88	92.7251	52.6	53.1	53.1	52.6	52.4	54.7	57.5	58.4	59.2	61.1	0.854799
138	846	B	11	2	37	39	94.38	107.92	92.7614	55.4	55.6	55.2	54.6	54.3	56.5	59.2	60.3	61.3	63.9	1.14554
138	846	B	11	2	41	43	94.42	107.96	92.797	52.3	53.1	53.4	53.3	53.4	56.5	59.5	60.8	62.5	65	0.822336
138	846	B	11	2	45	47	94.46	108	92.8325	57.3	58	57.9	57.4	57.3	59.6	62.3	63.6	64.5	66.4	1.34201
138	846	B	11	2	49	51	94.5	108.04	92.8679	55.3	56.2	56.1	55.6	55.6	58.3	61	62.2	63.6	65.9	1.13327
138	846	B	11	2	53	55	94.54	108.08	92.9034	58.9	60.4	60.2	59.6	59.2	61.3	63.9	64.9	65.6	67.4	1.50725
138	846	B	11	2	57	59	94.58	108.12	92.9388	59.9	60.7	60.7	60	59.5	61.2	63.9	64.4	65.4	67.7	1.61069
138	846	B	11	2	61	63	94.62	108.16	92.9742	56.2	57.1	56.7	56.4	55.8	58.2	60.9	61.8	62.9	65.1	1.22505
138	846	B	11	2	65	67	94.66	108.2	93.0097	49.7	51	51.6	51.6	52	55.9	59.2	60.5	62.2	64.2	0.548053
138	846	B	11	2	69	71	94.7	108.24	93.0452	49.5	50	49.9	49.4	49.6	52.6	55.7	56.9	58.2	60.6	0.526618
138	846	B	11	2	73	75	94.74	108.28	93.0806	51.9	52	51.7	51.1	50.9	53.5	56.3	57.4	58.4	61.1	0.775736
138	846	B	11	2	77	79	94.78	108.32	93.116	58.3	58.9	58.7	58	57.6	59.7	62.2	63.2	64.4	66.9	1.44109
138	846	B	11	2	81	83	94.82	108.36	93.1516	44.5	45.4	45.5	45.2	45.4	48.9	52.5	54.1	55.5	58	0.00446075
138	846	B	11	2	85	87	94.86	108.4	93.187	53.2	53.2	52.7	52	51.7	54	56.7	57.8	58.9	61.6	0.909146
138	846	B	11	2	89	91	94.9	108.44	93.2224	61.3	62.7	62.6	61.7	61.2	63.2	65.6	66.9	67.8	69.3	1.7514
138	846	B	11	2	93	95	94.94	108.48	93.2575	62.8	63.7	63.9	63.2	63.3	65.5	67.9	69.1	70.2	72.2	1.90686
138	846	B	11	2	97	99	94.98	108.52	93.2919	69.4	70.3	69.8	68.4	67.4	68.3	70.2	70.9	71.5	73.8	2.59302
138	846	B	11	2	101	103	95.02	108.56	93.3263	62.3	62.5	61.9	61.2	61	63.1	65.6	66.7	67.8	70.4	1.85359
138	846	B	11	2	105	107	95.06	108.6	93.3606	58.7	59.1	59	58.4	58.2	60.5	63.1	64.1	65.5	67.8	1.47836
138	846	B	11	2	109	111	95.1	108.64	93.395	53.6	54.1	53.6	53.1	52.9	55.3	58	59.3	60.8	63	0.947037
138	846	B	11	2	113	115	95.14	108.68	93.4294	55.4	55.7	55.6	55.4	55.5	58	60.7	62.1	63.5	65.6	1.13372
138	846	B	11	2	117	119	95.18	108.72	93.4637	51.3	51.3	51.1	50.7	50.6	53.2	56.1	57.4	58.9	61.5	0.706458
138	846	B	11	2	121	123	95.22	108.76	93.4981	49.3	49.4	49.3	49.1	49.1	51.8	54.8	56.3	57.4	60	0.497719
138	846	B	11	2	125	127	95.26	108.8	93.5325	48.4	48.8	48.7	48.4	48.5	51.3	54.4	55.7	57.1	59.7	0.403444
138	846	B	11	2	129	131	95.3	108.84	93.5668	53.5	54	54	53.5	53.3	55.9	58.6	59.8	61	63.3	0.93352
138	846	B	11	2	133	135	95.34	108.88	93.6012	50.9	51.7	51.2	50.6	49.8	52.1	54.8	55.9	57.1	58.9	0.662346
138	846	B	11	2	137	139	95.38	108.92	93.6355	54.3	55.6	55	53.7	52.9	54.4	57	57.9	58.2	60.9	1.01552
138	846	B	11	2	141	143	95.42	108.96	93.6699	52.5	52.3	52.1	51.2	50.9	52.8	55.5	56.7	57.7	59.7	0.827595
138	846	B	11	2	145	147	95.46	109.02	93.7215	51.5	51.6	51	50	49.1	50.8	53.5	54.7	55.3	58.1	0.722603
138	846	B	11	3	1	3	95.52	109.06	93.7558	51.5	52.4	52.1	50.7	49.5	51	53.6	54.5	55	57.5	0.721981
138	846	B	11	3	5	7	95.56	109.1	93.7902	55.6	56.1	55.6	54.2	52.9	54.4	56.8	57.7	58.3	60.3	1.148
138	846	B	11	3	9	11	95.6	109.14	93.8245	44.5	44.7	44.2	43.7	43.5	46.2	49.4	50.7	52.1	54.8	-0.0076707
138	846	B	11	3	13	15	95.64	109.18	93.8589	52.1	51.7	51	50	49	50.8	53.5	54.4	55.4	57.7	0.78255
138	846	B	11	3	17	19	95.68	109.22	93.8933	44.4	44.6	44.4	44	43.9	47.2	50.4	52	53.3	55.9	-0.0193208
138	846	B	11	3	21	23	95.72	109.26	93.9276	54.8	54.9	54.3	53.4	52.7	54.8	57.4	58.5	59.9	61.9	1.06226
138	846	B	11	3	25	27	95.76	109.3	93.962	58.1	59.1	58.8	57.5	56.7	58.3	60.6	61.7	62.2	64.3	1.40503
138	846	B	11	3	29	31	95.8	109.34	93.9964	53.6	53.3	52.5	51.5	50.7	52.7	55.3	56.4	57.7	60.1	0.93615
138	846	B	11	3	33	35	95.84	109.38	94.0307	56.1	56.3	55.6	54.3	53.1	54.8	57.1	58.1	58.9	60.9	1.19567
138	846	B	11	3	37	39	95.88	109.42	94.0651	61.8	62	61.3	59.3	57.8	58.5	60.7	61.1	61.8	63.6	1.78818
138	846	B	11	3	41	43	95.92	109.46	94.0994	57.7	57	56.4	54.9	54	55.4	57.8	58.8	59.8	62	1.36092
138	846	B	11	3	45	47	95.96	109.5	94.1338	58.6	58.3	57.5	56.2	55	56.4	58.9	59.9	60.4	62.3	1.45395
138	846	B	11	3	49	51	96	109.54	94.1682	57.2	58.2	57.3	56.2	55.2	56.8	59.3	60.2	60.7	62.9	1.30765
138	846	B	11	3	53	55	96.04	109.58	94.2025	58.9	59.3	58.8	57.5	56.3	57.7	60.1	60.9	61.5	63.4	1.48393
138	846	B	11	3	57	59	96.08	109.62	94.2369	59.8	60.5	59.8	58.3	56.9	58.1	60.3	61.1	61.6	63.8	1.57696
138	846	B	11	3	61	63	96.12	109.66	94.2713	63.2	63.2	62.1	60.4	58.7	59.5	61.6	62.5	63.4	65.1	1.93013
138	846	B	11	3	65	67	96.16	109.7	94.3056	65.5	65.5	64.9	63.3	62.1	63.1	65.1	65.9	66.6	68.8	2.16884
138	846	B	11	3	69	71	96.2	109.74	94.34	58.9	59.3	58.9	58.1	57.3	59.3	61.8	62.7	63.7	65.9	1.48144
138	846	B	11	3	73	75	96.24	109.78	94.3746	60	61	60.6	59.7	59	60.8	63.2	64.3	65.2	67.7	1.59528
138	846	B	11	3	77	79	96.28	109.82	94.4101	60.1	61.1	60.8	60	59.2	60.9	63.2	64.2	65	67.4	1.60506
138	846	B	11	3	81	83	96.32	109.86	94.4455	61.4	62.3	62	61	60.1	61.7	63.9	64.9	65.8	68	1.73972
138	846	B	11	3	85	87	96.36	109.9	94.481	62.7	63.4	62.8	61.7	60.7	62	64.3	65	65.6	67.9	1.87437
138	846	B	11	3	89	91	96.4	109.94	94.5165	53.9	55.1	54.4	53.5	52.5	54.1	56.7	57.6	58.3	60.6	0.958034
138	846	B	11	3	93	95	96.44	109.98	94.5519	57.4	58	57.9	57.5	57	59.6	62.1	63.5	64.4	67.3	1.32162
138	846	B	11	3	97	99	96.48	110.02	94.5873	64.9	65.2	64.4	63.5	62.6	64.1	66.4	67.1	67.9	70.3	2.10143
138	846	B	11	3	101	103	96.52	110.06	94.6228	62.2	62.7	62.1	61	60.1	61.6	63.8	64.5	65.6	67.5	1.81985
138	846	B	11	3	105	107	96.56	110.1	94.6583	62.5	63	62.5	61.3	60.4	62	64.1	65	65.8	67.8	1.85045
138	846	B	11	3	109	111	96.6	110.14	94.6933	59.5	59.9	59	58.2	57.4	59.3	61.6	62.5	63.8	65.8	1.53765
138	846	B	11	3	113	115	96.64	110.18	94.7277	57.4	57.8	58.1	57.7	57.6	60.9	63.8	65.1	66.6	69.2	1.31851
138	846	B	11	3	117	119	96.68	110.22	94.7621	54.7	55.8	55.8	55.5	55.4	58.4	61.3	62.4	63.7	66	1.03693
138	846	B	11	3	121	123	96.72	110.26	94.7964	55.4	56.2	56.5	55.9	55.5	57.8	60.6	61.5	62.5	64.4	1.10915
138	846	B	11	3	125	127	96.76	110.3	94.8308	51.3	52.3	52.6	52.1	52.1	54.8	57.8	59.2	59.8	62.4	0.681884
138	846	B	11	3	129	131	96.8	110.34	94.8651	55.9	56.3	56.6	56.3	56.1	58.9	61.5	62.7	64.2	66.1	1.15993
138	846	B	11	3	133	135	96.84	110.38	94.8995	44.7	45.5	46.1	45.7	46.1	49.4	52.8	53.9	55.2	57.5	-0.00614429
138	846	B	11	3	137	139	96.88	110.42	94.9339	46.9	48.3	48.9	48.9	49	52.8	56.2	57.5	58.6	61.3	0.222161
138	846	B	11	3	141	143	96.92	110.46	94.9682	45	46.6	47.1	46.9	47.1	50.6	53.7	54.9	56.1	58.1	0.0238289
138	846	B	11	3	145	147	96.96	110.52	95.0198	40.5	41.9	42.3	42.5	42.8	46.6	50	51.4	52.3	54.9	-0.445367
138	846	B	11	4	1	3	97.02	110.56	95.0541	37.1	38.5	39.3	39.5	40	44.4	48.1	49.6	50.9	53.5	-0.799787
138	846	B	11	4	5	7	97.06	110.6	95.0885	41.9	43.5	44.2	44.2	44.5	48.1	51.5	52.6	53.8	56.3	-0.300929
138	846	B	11	4	9	11	97.1	110.64	95.1229	44.7	46.3	47	47	47.1	50.5	53.7	55	56.2	58.2	-0.0101885
138	846	B	11	4	13	15	97.14	110.68	95.1572	40.3	42.2	43.1	43.3	44	48.2	51.9	53.3	54.4	56.7	-0.468667
138	846	B	11	4	17	19	97.18	110.72	95.1916	41.7	43.2	44.2	44.5	45.3	49.9	53.7	55.2	56.8	58.8	-0.323607
138	846	B	11	4	21	23	97.22	110.76	95.226	38	40	40.6	41.3	42.2	47.2	51.1	52.8	54.2	56.5	-0.709245
138	846	B	11	4	25	27	97.26	110.8	95.261	34.2	35.7	36.8	37.5	38.9	44.1	48.4	50.1	51.9	54.8	-1.10529
138	846	B	11	4	29	31	97.3	110.84	95.2964	37.5	39.2	40.2	40.8	41.7	46.3	50.3	51.9	53.1	56	-0.762518
138	846	B	11	4	33	35	97.34	110.88	95.3318	34.1	35.5	36.7	37.4	38.5	43.2	47.3	49	50.3	52.9	-1.11694
138	846	B	11	4	37	39	97.38	110.92	95.3672	34.9	36.3	37.1	37.6	38.6	43.2	47.1	48.8	50.1	53	-1.03431
138	846	B	11	4	41	43	97.42	110.96	95.4028	35.8	37.5	38.6	39.2	40.2	44.9	48.9	50.4	51.9	54.2	-0.941284
138	846	B	11	4	45	47	97.46	111	95.4391	35.9	37.5	38.5	38.7	39.5	44	47.9	49.6	50.6	53.1	-0.931501
138	846	B	11	4	49	51	97.5	111.04	95.4749	39.9	41.7	42.4	42.5	43	46.8	50.4	51.9	52.6	55.6	-0.51589
138	846	B	11	4	53	55	97.54	111.08	95.5115	38.7	40.3	41.1	41.2	41.6	45.7	49.3	50.8	52.2	54.9	-0.641382
138	846	B	11	4	57	59	97.58	111.12	95.5482	40.6	42.5	43.3	43.4	43.8	47.8	51.5	53.1	54.6	56.6	-0.444293
138	846	B	11	4	61	63	97.62	111.16	95.5848	42.7	43.7	44.2	44.1	44.2	47.7	51.2	52.7	53.8	56.1	-0.226392
138	846	B	11	4	65	67	97.66	111.2	95.6214	55	55.5	55.3	54.8	54.5	56.9	59.6	60.8	61.9	64.5	1.0529
138	846	B	11	4	69	71	97.7	111.24	95.6581	56.7	57.4	57.2	56.6	56.2	58.5	61.2	62.3	63.4	66	1.22918
138	846	B	11	4	73	75	97.74	111.28	95.6947	56.9	57.4	57.3	56.8	56.4	58.8	61.5	62.9	63.9	66.2	1.24937
138	846	B	11	4	77	79	97.78	111.32	95.7314	58.1	58.8	58.5	57.7	57.1	59.3	62.1	63.2	63.9	65.6	1.37362
138	846	B	11	4	81	83	97.82	111.36	95.768	55.3	55.8	55.6	54.8	54.2	56.5	59.1	60.3	61.6	63.6	1.08163
138	846	B	11	4	85	87	97.86	111.4	95.8046	50.3	51	51.2	50.9	50.8	53.8	56.9	58.2	59.4	62.3	0.560718
138	846	B	11	4	89	91	97.9	111.44	95.8413	54.3	55.1	54.9	54.2	53.8	56.1	58.9	60	60.9	63.2	0.976329
138	846	B	11	4	93	95	97.94	111.48	95.8779	55.4	56.5	56.5	55.7	55.2	57.4	60.1	61.2	62.1	64.3	1.09017
138	846	B	11	4	97	99	97.98	111.52	95.9145	49.9	50.6	50.6	50	50	52.9	55.9	57.3	58.7	61.1	0.517228
138	846	B	11	4	101	103	98.02	111.56	95.9512	60.6	61.6	61.5	60.5	59.8	61.6	63.9	65	66	67.7	1.63003
138	846	B	11	4	105	107	98.06	111.6	95.9878	55.2	56.5	56	55.3	54.8	57.1	59.8	60.8	61.6	64.1	1.06749
138	846	B	11	4	109	111	98.1	111.64	96.0244	57.6	58.5	58.3	57.5	56.9	59.2	61.7	62.8	64	66	1.31661
138	846	B	11	4	113	115	98.14	111.68	96.0604	51.1	52.1	51.6	51	50.5	52.8	55.7	56.7	57.8	60.4	0.63961
138	846	B	11	4	117	119	98.18	111.72	96.0958	47.2	47.8	47.8	47.4	47.1	50	52.9	54.4	55.6	58.3	0.23316
138	846	B	11	4	121	123	98.22	111.76	96.1322	50	51.5	51.4	51.2	51	53.9	56.9	58.1	59.5	61.1	0.523901
138	846	B	11	4	125	127	98.26	111.8	96.1676	51.2	53.2	53.5	53.4	53.7	57	60.4	61.7	62.9	65.2	0.648149
138	846	B	11	4	129	131	98.3	111.84	96.2031	53.6	54.4	54.6	54.4	54.5	57.5	60.5	61.9	63.2	65.6	0.897267
138	846	B	11	4	133	135	98.34	111.88	96.2385	51.9	53.5	53.9	53.7	53.7	56.8	59.8	61.1	61.9	64.4	0.719745
138	846	B	11	4	137	139	98.38	111.92	96.274	55.9	57	57.5	57.3	57.7	60.8	64	65.3	66.2	69.1	1.13536
138	846	B	11	4	141	143	98.42	111.96	96.3095	49.8	51.3	51.9	52.2	52.7	56.3	59.6	61.3	62.4	63.8	0.499978
138	846	B	11	4	145	147	98.46	112.02	96.3626	58.1	59	59.2	59.2	59.1	61.7	64.7	65.8	66.9	69.4	1.36273
138	846	B	11	5	1	3	98.52	112.06	96.3981	43.9	44.6	45.1	45.1	45.2	48.8	52.2	53.5	55.1	57.7	-0.115521
138	846	B	11	5	5	7	98.56	112.1	96.4336	50.3	51.5	52	51.8	51.9	55	58.1	59.4	60.8	63	0.549831
138	846	B	11	5	9	11	98.6	112.14	96.469	58.2	59.3	59.6	59.3	59.4	62.1	64.9	66.3	67.2	69.4	1.37127
138	846	B	11	5	13	15	98.64	112.18	96.5044	57	58.4	58.7	58.4	58.6	61.5	64.3	65.5	66.6	69.1	1.24578
138	846	B	11	5	17	19	98.68	112.22	96.5398	63.7	64.2	64.5	64.3	64.3	66.7	69.3	70.3	71.5	73.7	1.94235
138	846	B	11	5	21	23	98.72	112.26	96.5753	61.9	62.6	62.6	62.4	62.4	65	67.6	68.7	70.1	72.8	1.75442
138	846	B	11	5	25	27	98.76	112.3	96.6108	59.2	60.5	61	61	61.3	64.6	67.6	69	70.1	72.8	1.47284
138	846	B	11	5	29	31	98.8	112.34	96.6453	51.5	53.4	54.2	54.3	54.9	58.9	62.3	63.7	65.1	67.2	0.670967
138	846	B	11	5	33	35	98.84	112.38	96.6797	53.1	54.1	54.8	54.7	55.3	58.5	61.7	62.8	64.1	66.4	0.83684
138	846	B	11	5	37	39	98.88	112.42	96.7141	53.3	54.6	55.2	55.3	55.7	59.4	62.6	63.8	65	67.4	0.857028
138	846	B	11	5	41	43	98.92	112.46	96.7484	48.8	50.5	51.1	51	51.5	55.3	58.5	59.9	61.1	63.7	0.388144
138	846	B	11	5	45	47	98.96	112.5	96.7828	50.9	52.2	52.5	52.3	52.4	55.5	58.4	59.6	60.7	62.8	0.606044
138	846	B	11	5	49	51	99	112.54	96.8172	46.6	47.5	48	47.8	47.8	51	54.2	55.4	56.6	58.9	0.157972
138	846	B	11	5	53	55	99.04	112.58	96.8515	45.3	46.5	46.7	46.3	46.1	49	52.2	53.3	54.2	56.8	0.0220743
138	846	B	11	5	57	59	99.08	112.62	96.8859	42	43.2	43.8	43.7	44	48	51.5	53.1	54.5	56.5	-0.321941
138	846	B	11	5	61	63	99.12	112.66	96.9203	42.8	43.9	44.2	44	44.1	47.6	51	52.3	53.4	56.3	-0.239316
138	846	B	11	5	65	67	99.16	112.7	96.9546	46.4	48	48.4	48.1	48.2	51.4	54.6	55.8	56.7	59.4	0.134672
138	846	B	11	5	69	71	99.2	112.74	96.989	48.5	49.9	50.1	49.7	49.7	52.6	55.6	56.9	57.5	60.3	0.352572
138	846	B	11	5	73	75	99.24	112.78	97.0233	48.3	49.6	49.9	49.6	49.7	53	56.1	57.6	58.7	60.8	0.331138
138	846	B	11	5	77	79	99.28	112.82	97.0577	51.1	52.8	52.6	52.3	52.2	55.2	58	59.2	60.4	62.2	0.621879
138	846	B	11	5	81	83	99.32	112.86	97.0921	51	52	52.1	51.7	51.6	54.3	57.3	58.3	59.2	62.1	0.610851
138	846	B	11	5	85	87	99.36	112.9	97.1264	50.3	51.8	52.1	51.7	51.7	54.4	57.5	58.8	59.7	61.9	0.537388
138	846	B	11	5	89	91	99.4	112.94	97.1608	50.8	52.4	52.5	52.2	52.3	55.1	57.9	59	60.2	62.1	0.588796
138	846	B	11	5	93	95	99.44	112.98	97.1949	53.8	54.5	54.5	54.2	54.1	56.6	59.3	60.3	61.2	63.4	0.900348
138	846	B	11	5	97	99	99.48	113.02	97.2287	51.9	52.2	52.3	51.8	51.4	53.8	56.7	58.1	59	61	0.702016
138	846	B	11	5	101	103	99.52	113.06	97.2625	54.7	55.4	55.2	54.6	54.3	56.5	59.2	60.3	61.2	63.5	0.992756
138	846	B	11	5	105	107	99.56	113.1	97.2964	57.3	59.1	58.9	58.2	57.8	59.8	62.5	63.2	64.2	66.6	1.26269
138	846	B	11	5	109	111	99.6	113.14	97.3302	52.9	53.6	53.2	52.7	52.2	54.6	57.2	58.6	59.5	62.3	0.804208
138	846	B	11	5	113	115	99.64	113.18	97.364	55.2	55.7	55.1	54.4	54.1	56	58.9	59.9	61.3	63.4	1.04292
138	846	B	11	5	117	119	99.68	113.22	97.3979	57.5	58.6	58.5	58.1	57.9	60.4	63.3	64.3	65.3	68	1.28163
138	846	B	11	5	121	123	99.72	113.26	97.4317	63.4	64.4	64.1	63.4	62.7	64.3	66.7	67.6	68.3	70.6	1.89495
138	846	B	11	5	125	127	99.76	113.3	97.4655	64.6	65.5	65.3	64.4	63.5	64.9	67.1	67.9	68.5	70.6	2.0192
138	846	B	11	5	129	131	99.8	113.34	97.4994	60	60.5	60.1	59.6	59.2	61.3	63.8	64.8	66	68	1.53991
138	846	B	11	5	133	135	99.84	113.38	97.5332	64.8	65.4	64.9	64.4	64	65.7	68	69	69.8	72.3	2.03877
138	846	B	11	5	137	139	99.88	113.42	97.5661	65.5	65.7	65.4	64.7	64.2	65.7	68	68.9	69.9	72.2	2.11099
138	846	B	11	5	141	143	99.92	113.46	97.5984	70	69.8	69.6	68.8	68.4	70	72.3	73.2	74.3	76.4	2.57863
138	846	B	11	5	145	147	99.96	113.52	97.6467	70.2	70.8	70.2	69.2	68.1	69.2	71.3	71.9	72.7	75.1	2.59851
138	846	B	11	6	1	3	100.02	113.56	97.6789	55	54.9	54	53.3	52.6	54.6	57.2	58.3	59.6	61.8	1.0162
138	846	B	11	6	5	7	100.06	113.6	97.7111	58	57.8	57.5	57	56.6	59.1	61.7	62.8	64.3	66.6	1.32775
138	846	B	11	6	9	11	100.1	113.64	97.7433	57.1	57.7	57.5	56.8	56.3	58.3	60.9	61.6	62.9	65.2	1.23348
138	846	B	11	6	13	15	100.14	113.68	97.7752	55.5	56.1	56.1	55.3	54.9	57	59.6	60.8	61.6	64.3	1.06636
138	846	B	11	6	17	19	100.18	113.72	97.8071	53.4	53.5	53.5	52.9	52.6	55.2	58	59.2	60.5	62.9	0.847215
138	846	B	11	6	21	23	100.22	113.76	97.839	52	53.2	53.1	52.4	52.1	54.7	57.4	58.5	59.8	62.1	0.700912
138	846	B	11	6	25	27	100.26	113.8	97.871	47.7	48.4	48.2	47.5	47.2	49.7	52.6	53.6	54.7	57.4	0.252839
138	846	B	11	6	29	31	100.3	113.84	97.9029	48.1	49.2	49.1	48.6	48.3	50.7	53.6	54.7	55.6	57.8	0.29384
138	846	B	11	6	33	35	100.34	113.88	97.9346	42.8	44.5	44.9	44.9	45.1	48.5	51.8	53.2	54.2	56.6	-0.258291
138	846	B	11	6	37	39	100.38	113.92	97.9662	40.9	42.2	42.9	43.1	43.9	47.7	51.3	52.7	54	56.8	-0.456624
138	846	B	11	6	41	43	100.42	113.96	97.9979	47.1	48.2	48.6	48.7	48.9	52.1	55.3	56.6	57.6	60	0.187915
138	846	B	11	6	45	47	100.46	114	98.0296	42.8	44	44.4	44.5	45	48.4	51.7	53	54.2	56.8	-0.260157
138	846	B	11	6	49	51	100.5	114.04	98.0612	42.8	44.1	44.9	45.1	45.6	49.2	52.6	54	55.2	57.7	-0.260779
138	846	B	11	6	53	55	100.54	114.08	98.0927	42.9	44.4	45	45.3	46	49.6	53.2	54.4	55.6	58.2	-0.250996
138	846	B	11	6	57	59	100.58	114.12	98.1243	40	41.4	42	42.5	43.3	47.2	50.8	52.2	53.5	56.1	-0.553387
138	846	B	11	6	61	63	100.62	114.16	98.1558	34.7	36.3	37	37.7	38.6	43.1	46.9	48.6	49.9	52.4	-1.10552
138	846	B	11	6	65	67	100.66	114.2	98.1873	35.7	37.4	38.5	39	39.9	44.7	48.6	50.4	52	54.7	-1.00208
138	846	B	11	6	69	71	100.7	114.24	98.2188	37.7	38.9	39.7	40.1	40.9	45.1	48.8	50.2	51.5	54.4	-0.794588
138	846	B	11	6	73	75	100.74	114.28	98.2503	35.4	36.8	37.5	37.6	38.3	42.4	46.4	47.8	48.9	51.4	-1.03454
138	846	B	11	6	77	79	100.78	114.32	98.2818	35.7	36.9	37.7	37.9	38.6	42.7	46.4	48	49.2	52.4	-1.00395
138	846	B	11	6	81	83	100.82	114.36	98.3133	36.7	38	38.7	39	39.8	43.8	47.5	49.2	50.5	53.1	-0.900512
138	846	B	11	6	85	87	100.86	114.4	98.3448	36.2	37.4	38.1	38.4	39	43.1	46.7	48.2	49.6	52.3	-0.953163
138	846	B	11	6	89	91	100.9	114.44	98.3763	38.2	39.4	40	40.2	40.9	44.8	48.4	50	51.4	53.5	-0.745669
138	846	B	11	6	93	95	100.94	114.48	98.4078	37.6	39	39.9	40.3	41.2	45.7	49.7	51.5	52.9	55.6	-0.808726
138	846	B	11	6	97	99	100.98	114.52	98.4393	40.9	42.5	43.3	43.7	44.4	48.2	51.9	53.4	54.3	56.8	-0.465956
138	846	B	11	6	101	103	101.02	114.56	98.4708	42.8	44.6	45.4	45.8	46.6	50.5	54	55.4	56.6	58.8	-0.268867
138	846	B	11	6	105	107	101.06	114.6	98.5023	46	47.2	47.5	47.6	47.9	51.3	54.6	55.7	57.1	59.5	0.0634981
138	846	B	11	6	109	111	101.1	114.64	98.5339	48.7	50.2	50.9	51	51.5	55.2	58.4	59.7	60.9	63.3	0.343833
138	846	B	11	6	113	115	101.14	114.68	98.5654	44.1	45.6	46.2	46.2	46.6	50.2	53.5	54.8	56.1	58.5	-0.135458
138	846	B	11	6	117	119	101.18	114.72	98.5969	44.1	45.7	46.4	46.4	46.7	50.4	53.7	54.9	56	58.5	-0.13608
138	846	B	11	6	121	123	101.22	114.76	98.6285	44.2	45.9	46.5	46.4	46.6	50.1	53.4	54.5	55.8	58.3	-0.126295
138	846	B	11	6	125	127	101.26	114.8	98.66	44.9	46.3	46.7	46.4	46.4	49.6	52.7	54.1	55	57.4	-0.0540777
138	846	B	11	6	129	131	101.3	114.84	98.6917	47.2	48.1	48.7	48.5	48.5	51.9	55.1	56.4	57.6	59.9	0.184634
138	846	B	11	6	133	135	101.34	114.88	98.7234	48.4	49.6	49.9	49.6	49.7	52.7	55.8	57.2	58.4	61.1	0.308883
138	846	B	11	6	137	139	101.38	114.92	98.755	50.6	52.3	52.6	52.2	52	54.7	57.7	58.7	59.7	62.3	0.537188
138	846	B	11	7	1	3	101.42	114.96	98.7867	43	44.7	45.1	44.6	44.4	47.5	50.6	51.6	52.6	55.1	-0.254277
138	846	B	11	7	5	7	101.46	115	98.8185	50.1	51.3	51.6	51.2	51	53.8	56.8	58	59.3	61.4	0.483915
138	846	B	11	7	9	11	101.5	115.04	98.8505	54.8	56.3	56.6	55.9	55.7	58.5	61.3	62.4	63.3	65.9	0.972367
138	846	B	11	7	13	15	101.54	115.08	98.8824	55.6	57.1	57.2	56.4	55.8	57.9	60.5	61.4	62.2	63.8	1.05499
138	846	B	11	7	17	19	101.58	115.12	98.9143	52.5	53.4	53.4	52.7	52.2	54.3	57.1	58.3	59.5	61.9	0.731789
138	846	B	11	7	21	23	101.62	115.16	98.9462	55.2	56.4	56.6	56.2	55.8	58.1	60.9	61.9	62.7	65	1.01212
138	846	B	11	7	25	27	101.66	115.2	98.9782	53.2	54.7	55.3	54.9	54.8	57.5	60.4	61.6	62.2	64.4	0.803386
138	846	B	11	7	29	31	101.7	115.24	99.0101	51.3	53.3	53.8	53.7	53.9	56.9	60	61	62.1	64.3	0.605052
138	846	B	11	7	33	35	101.74	115.28	99.042	49.6	51.1	51.5	51.5	51.6	54.9	57.9	59.5	60.6	62.9	0.427531
138	846	B	11	7	37	39	101.78	115.32	99.0739	47.1	48.5	49.2	49	49.3	52.7	56	57.3	58.6	60.5	0.166764
138	846	B	11	7	41	43	101.82	115.36	99.1058	45.7	47	47.6	47.6	47.9	51.7	55.2	56.7	57.7	60.6	0.0204594
138	846	B	11	7	45	47	101.86	115.4	99.1378	44.7	46.1	46.6	46.5	46.7	50.2	53.4	54.8	55.9	58.6	-0.0842206
138	846	B	11	7	49	51	101.9	115.44	99.1702	55.8	57	57.2	57	56.9	59.5	62.2	63.4	64.6	66.8	1.0702
138	846	B	11	7	53	55	101.94	115.48	99.2025	60	61.1	61.5	61.1	60.9	63.4	66	67.1	67.9	70	1.50663
138	846	B	11	7	57	59	101.98	115.52	99.2349	52.9	54.4	54.8	54.7	54.7	57.5	60.4	61.7	62.6	64.8	0.767191
138	846	B	11	7	61	63	102.02	115.56	99.2673	53.1	54.7	55.2	55.1	54.9	57.5	60.2	61.4	62.4	64.5	0.787381
138	846	B	11	7	65	67	102.06	115.6	99.2996	46.7	48.3	49.1	49.2	49.6	53.5	57	58.5	59.9	62.2	0.120786
138	846	B	11	7	69	71	102.1	115.64	99.3322	44.2	45.6	46.6	46.8	47.1	51.1	54.6	55.9	57.3	59.6	-0.139982
138	846	B	11	7	73	75	102.14	115.68	99.3731	43.8	45.9	46.7	46.9	47.4	51	54.3	55.7	57.1	59.2	-0.204625
138	846	D	11	5	65	67	103.46	115.86	99.4279	39	43.1	45.1	46.4	47.7	51.8	54.9	55.9	55.8	55.7	0.152987
138	846	D	11	5	73	75	103.54	115.94	99.4934	35.7	39.8	41.7	43.1	44.2	48.9	52	53.3	52.9	53.6	-0.226818
138	846	D	11	5	81	83	103.62	116.02	99.5595	35.8	39.8	42	43.6	45.3	50.5	54.1	55.4	55.6	56	-0.217878
138	846	D	11	5	89	91	103.7	116.1	99.628	34.1	38	40.3	41.8	43.5	48.5	52.1	53.4	53.7	54.1	-0.414743
138	846	D	11	5	97	99	103.78	116.18	99.6957	35	39.2	41.5	43.1	44.9	50.3	54	55.5	55.7	56	-0.314333
138	846	D	11	5	105	107	103.86	116.26	99.7634	32.1	35.8	38.2	39.6	41.5	47.5	51.6	53.2	53.9	54.2	-0.648403
138	846	D	11	5	113	115	103.94	116.34	99.831	35.2	39.1	41.5	42.9	44.7	49.8	53.7	54.8	55.3	55.1	-0.296451
138	846	D	11	5	121	123	104.02	116.42	99.8987	36.7	40.3	42.6	43.7	45.3	49.5	53	53.8	54.3	53.9	-0.127438
138	846	D	11	5	129	131	104.1	116.5	99.9672	36.8	40.9	43	44.5	46	50.8	54.1	55.3	55.4	55.7	-0.118498
138	846	D	11	5	137	139	104.18	116.58	100.036	36.5	40.4	42.3	43.6	44.8	49	52.1	53.2	53.2	53.3	-0.155292
138	846	D	11	5	145	147	104.26	116.66	100.104	37.5	41.4	43.5	44.9	46.2	50.2	53.2	54	53.9	54	-0.0434477
138	846	D	11	6	1	3	104.32	116.72	100.156	34.5	38.3	40.5	42	43.5	48	51.5	52.4	52.6	52.9	-0.388329
138	846	D	11	6	9	11	104.4	116.8	100.225	31.2	34.9	37.1	38.5	39.9	44.9	48.6	49.6	49.8	50.3	-0.768135
138	846	D	11	6	17	19	104.48	116.88	100.293	28.7	32.2	34.1	35.4	36.7	41.2	44.7	45.5	45.4	45.6	-1.05647
138	846	D	11	6	25	27	104.56	116.96	100.362	31.1	34.6	36.5	37.2	37.8	41.6	44.7	45.1	44.6	45.3	-0.784554
138	846	D	11	6	33	35	104.64	117.04	100.431	31.3	34.5	36.4	36.9	37.5	41	43.9	44.5	43.8	44.5	-0.76418
138	846	D	11	6	41	43	104.72	117.12	100.499	33.4	36.5	37.8	37.9	37.9	40.6	43.3	43.7	43.2	43.2	-0.526565
138	846	B	12	1	31	33	102.32	117.16	100.511	51	52	52.1	51.7	51.5	54.3	57.1	58.5	59.3	62.1	0.543974
138	846	B	12	1	35	37	102.36	117.2	100.546	52.4	53.2	53.4	52.9	52.8	55.4	58.3	59.4	60.2	62.8	0.689032
138	846	D	11	6	49	51	104.8	117.2	100.567	34.3	37.5	38.7	38.8	38.7	41.6	44.1	44.8	44.2	44	-0.426155
138	846	B	12	1	39	41	102.4	117.24	100.582	49.1	50	50	49.5	49.4	52.1	55	56.1	57.4	59.5	0.345018
138	846	B	12	1	43	45	102.44	117.28	100.619	45.4	46.6	47.1	46.9	46.9	50.6	53.8	55	56	58.4	-0.0406194
138	846	B	12	1	47	49	102.48	117.32	100.658	49.2	50.6	50.8	50.4	50	52.6	55.5	56.4	57.3	59.2	0.35418
138	846	B	12	1	51	53	102.52	117.36	100.696	49.9	50.8	51	50.6	50.5	53.4	56.3	57.5	58.5	60.7	0.426399
138	846	B	12	1	55	57	102.56	117.4	100.734	52.7	53.3	53.1	52.5	52.1	54.7	57.5	58.7	59.9	62	0.71714
138	846	B	12	1	59	61	102.6	117.44	100.773	43.6	44	44.2	43.9	44	47.3	50.5	52	53.4	56	-0.230413
138	846	B	12	1	63	65	102.64	117.48	100.811	47.4	48.5	48.4	47.6	47	49.5	52.3	53.3	54.2	56.4	0.164387
138	846	B	12	1	67	69	102.68	117.52	100.85	50.1	50.2	49.8	48.9	48	50	52.7	53.7	54.7	56.8	0.444722
138	846	B	12	1	71	73	102.72	117.56	100.889	52.5	53	52.6	51.4	50.6	52.5	55.2	56.1	56.9	59.3	0.69384
138	846	B	12	1	75	77	102.76	117.6	100.928	51.8	52.2	51.6	50.4	49.2	50.9	53.5	54.3	55.1	57.2	0.620376
138	846	B	12	1	79	81	102.8	117.64	100.967	49.3	48.8	48.1	47.1	46.2	48.1	50.9	51.9	52.8	55.5	0.359609
138	846	B	12	1	83	85	102.84	117.68	101.006	49	49.1	48.3	47	46.1	48.1	50.6	51.5	52.6	54.7	0.32777
138	846	B	12	1	87	89	102.88	117.72	101.045	47.8	48.7	48.3	47.2	46.5	48.6	51.5	52.3	53.2	55.4	0.202278
138	846	B	12	1	91	93	102.92	117.76	101.084	50.8	50.8	50	48.8	47.8	49.6	52.2	53.3	54.1	56.6	0.51383
138	846	B	12	1	95	97	102.96	117.8	101.123	44.8	44	43.3	42.1	41.4	43.4	46.4	47.5	48.7	51.2	-0.111142
138	846	B	12	1	99	101	103	117.84	101.162	46.3	46.7	46.1	45.1	44.2	46.4	49.2	50.3	51.5	53.6	0.0443232
138	846	B	12	1	103	105	103.04	117.88	101.201	57.2	57.9	57.1	55.5	54	55.3	57.6	58.3	58.9	60.9	1.17794
138	846	B	12	1	107	109	103.08	117.92	101.24	59.8	60.3	59.5	58.1	56.8	58.3	60.4	61.4	62.1	63.9	1.44787
138	846	B	12	1	111	113	103.12	117.96	101.279	53	52.1	51	49.7	48.8	50.5	53	53.9	54.9	57.2	0.739648
138	846	B	12	1	115	117	103.16	118	101.318	53.5	53	52.1	51.1	50.3	52.1	54.6	55.5	56.7	59	0.791055
138	846	B	12	1	119	121	103.2	118.04	101.357	60.2	59.6	58.9	58.1	57.3	58.9	61.3	62	63.2	65.2	1.48762
138	846	B	12	1	123	125	103.24	118.08	101.396	60.7	61.3	61	60	59.2	60.9	63.2	63.8	64.9	66.7	1.53903
138	846	B	12	1	127	129	103.28	118.12	101.436	52.5	52.4	51.9	51.1	50.7	52.9	55.7	56.8	58.3	60.5	0.68513
138	846	B	12	1	131	133	103.32	118.16	101.475	53.8	53.9	53.7	53.3	52.9	55.5	58.5	59.6	60.8	63.9	0.819783
138	846	B	12	1	135	137	103.36	118.2	101.514	53.5	54.1	53.5	52.7	52.2	54.6	57.2	58.2	60	62.1	0.787945
138	846	B	12	1	139	141	103.4	118.24	101.553	55.9	56.3	55.8	55.1	54.4	56.5	59	60.1	60.8	63.4	1.03706
138	846	B	12	1	143	145	103.44	118.28	101.592	61.3	62	61.2	60	58.9	60.3	62.6	63.4	64	66.3	1.59836
138	846	B	12	1	147	149	103.48	118.32	101.631	52.3	53.6	53.4	52.8	52.6	54.9	57.7	58.7	59.9	61.6	0.661208
138	846	B	12	2	1	3	103.52	118.36	101.67	47.1	48.5	48.3	47.5	47	49.2	52	52.8	53.6	55.8	0.119483
138	846	B	12	2	5	7	103.56	118.4	101.709	51.1	53	53.2	52.4	52.1	54.9	57.8	58.8	59.5	61.7	0.535093
138	846	B	12	2	9	11	103.6	118.44	101.749	54.1	55.3	54.9	53.7	52.6	54.2	56.7	57.5	58.1	60	0.846647
138	846	B	12	2	13	15	103.64	118.48	101.788	54	54.9	54.4	53.3	52.3	54	56.4	57.2	57.7	59.7	0.835619
138	846	B	12	2	17	19	103.68	118.52	101.827	48.1	49.3	49.3	48.6	48.3	51	53.9	54.9	55.9	57.8	0.221052
138	846	B	12	2	21	23	103.72	118.56	101.867	48.1	48.5	48.3	47.5	47.1	49.6	52.4	53.6	54.8	57.1	0.22043
138	846	B	12	2	25	27	103.76	118.6	101.906	52.1	53.1	52.8	51.9	51.3	53.4	56.1	56.9	57.8	60	0.636041
138	846	B	12	2	29	31	103.8	118.64	101.945	51.4	52.3	52.3	51.7	51.2	53.7	56.2	57.2	58.1	59.9	0.562579
138	846	B	12	2	33	35	103.84	118.68	101.985	53.6	54.7	54.5	53.4	52.5	54.3	56.8	57.6	58.3	60.2	0.790884
138	846	B	12	2	37	39	103.88	118.72	102.024	50.6	51.3	50.8	49.9	49.2	51.2	53.9	54.7	55.3	57.5	0.478088
138	846	B	12	2	41	43	103.92	118.76	102.064	47.2	47.4	46.9	46.1	45.4	47.6	50.5	51.5	52.5	54.8	0.123668
138	846	B	12	2	45	47	103.96	118.8	102.103	49.4	49.8	49.3	48.3	47.4	49.5	52.1	52.9	53.7	56	0.351973
138	846	B	12	2	49	51	104	118.84	102.143	45.5	46.4	46.1	45.3	44.7	47.1	50	51	51.8	53.9	-0.0544756
138	846	B	12	2	53	55	104.04	118.88	102.182	46.9	47.4	47.2	46.4	45.8	48.2	51.1	52	52.9	55	0.0905831
138	846	B	12	2	57	59	104.08	118.92	102.222	51.6	52.3	52	51.2	50.5	52.6	55.3	56.3	56.9	59	0.579035
138	846	B	12	2	61	63	104.12	118.96	102.261	52.3	53.1	52.7	51.6	50.7	52.5	55.1	56	56.7	58.6	0.651254
138	846	B	12	2	65	67	104.16	119	102.301	53.6	54.5	53.9	52.4	51.1	52.7	55	55.6	56.4	58.5	0.785908
138	846	B	12	2	69	71	104.2	119.04	102.34	52.7	52.6	52.1	51.2	50.5	52.5	55.2	56.3	57.3	59.3	0.691633
138	846	B	12	2	73	75	104.24	119.08	102.379	57.2	57.7	57.5	56.7	56	58	60.4	61.4	62.3	64.5	1.15927
138	846	B	12	2	77	79	104.28	119.12	102.419	51.5	51.9	51.8	51.1	50.7	53.2	55.9	56.9	58.1	60.6	0.565519
138	846	B	12	2	81	83	104.32	119.16	102.459	55.5	56.5	56.6	56.1	55.8	58.2	60.9	62	63	65.1	0.98113
138	846	B	12	2	85	87	104.36	119.2	102.499	52.1	53.3	53.4	53	52.9	55.6	58.5	59.6	60.6	62.7	0.626709
138	846	B	12	2	89	91	104.4	119.24	102.539	58.1	59.2	59	58	57	58.6	61	61.8	62.4	64.4	1.25044
138	846	B	12	2	93	95	104.44	119.28	102.579	58.7	59.2	59.2	58.7	58.4	60.6	63.1	64.1	65	67.2	1.31225
138	846	B	12	2	97	99	104.48	119.32	102.619	53.1	53.4	52.8	51.7	50.9	52.7	55.2	56	56.7	58.6	0.728901
138	846	B	12	2	101	103	104.52	119.36	102.659	52.5	52.9	52.5	51.7	51.2	53.2	55.8	56.8	57.8	59.7	0.665844
138	846	B	12	2	105	107	104.56	119.4	102.699	51.9	52.1	51.7	50.9	50.2	52.3	55	56.1	57.1	59.3	0.602788
138	846	B	12	2	109	111	104.6	119.44	102.739	56.6	57.3	56.9	55.9	55	56.7	59.3	60.1	60.8	62.8	1.09124
138	846	B	12	2	113	115	104.64	119.48	102.779	50.6	51.8	52	51.7	51.6	54.9	57.9	59.2	60.1	62.4	0.466268
138	846	B	12	2	117	119	104.68	119.52	102.819	53.5	54.7	54.3	53.4	52.7	55.1	57.8	58.6	59.5	61.7	0.767414
138	846	B	12	2	121	123	104.72	119.56	102.859	52.5	53.3	53	52.1	51.4	53.5	56.2	57	57.9	60.2	0.662734
138	846	B	12	2	125	127	104.76	119.6	102.899	52.7	53.5	53.2	52.4	51.7	53.8	56.4	57.2	58.1	60	0.682923
138	846	B	12	2	129	131	104.8	119.64	102.939	49.7	50	50	49.2	48.9	51.1	54	55.1	56	58.5	0.370127
138	846	B	12	2	133	135	104.84	119.68	102.979	54.2	55.9	56	55.7	55.8	58.3	61.3	62.2	63.4	64.9	0.837766
138	846	B	12	2	137	139	104.88	119.72	103.019	48.7	49.4	49.5	49	48.7	51.2	54.2	55.1	56.2	58.4	0.264824
138	846	B	12	2	141	143	104.92	119.76	103.059	45.1	45.8	45.8	45.3	45.2	47.8	50.9	52	53.1	55.5	-0.110408
138	846	B	12	2	145	147	104.96	119.82	103.119	40.6	41.5	41.9	41.7	41.7	45.1	48.3	49.7	51	53.1	-0.579604
138	846	B	12	3	1	3	105.02	119.86	103.159	42.2	42.5	42.3	41.7	41.4	44.3	47.4	48.7	49.8	52.4	-0.413733
138	846	B	12	3	5	7	105.06	119.9	103.198	46.5	47.4	47.5	47	46.8	49.6	52.6	53.8	54.8	57.1	0.0330959
138	846	B	12	3	9	11	105.1	119.94	103.238	48.9	49.6	49.8	49.5	49.4	52.2	55.3	56.4	57.4	59.9	0.282213
138	846	B	12	3	13	15	105.14	119.98	103.278	47.8	48.5	48.5	47.9	47.5	49.9	52.7	53.8	54.6	57	0.167128
138	846	B	12	3	17	19	105.18	120.02	103.318	43.5	44.6	44.7	44.3	44.1	46.9	49.8	50.9	51.8	54.2	-0.280945
138	846	B	12	3	21	23	105.22	120.06	103.358	45.5	46.9	47.4	47.1	47.1	50	53.1	54.3	55.1	57.6	-0.0734509
138	846	B	12	3	25	27	105.26	120.1	103.398	47.4	48.6	49.1	48.9	48.9	51.8	54.8	55.9	57.2	59.2	0.123638
138	846	B	12	3	29	31	105.3	120.14	103.438	47.7	48.9	49.2	48.8	48.6	51.2	54.1	55	56.1	58.4	0.154233
138	846	B	12	3	33	35	105.34	120.18	103.478	44.8	46.1	46.6	46.4	46.4	49.9	53.1	54.3	55.3	57.5	-0.148158
138	846	B	12	3	37	39	105.38	120.22	103.518	41.1	42.5	43.2	43.2	43.6	47.8	51.5	53	54.3	56.9	-0.533795
138	846	B	12	3	41	43	105.42	120.26	103.558	46.7	47.4	47.7	47.4	47.2	50.2	53.3	54.6	55.5	58.2	0.0483088
138	846	B	12	3	45	47	105.46	120.3	103.598	44.5	45.9	46.2	46	46.1	49	52.2	53.3	54.1	56.3	-0.181242
138	846	B	12	3	49	51	105.5	120.34	103.638	44	45.3	45.6	45.6	45.8	48.8	52	53.1	54.2	56.6	-0.233893
138	846	B	12	3	53	55	105.54	120.38	103.678	42.9	43.9	44.3	44.3	44.4	47.6	50.9	52.2	53.2	55.8	-0.348979
138	846	B	12	3	57	59	105.58	120.42	103.718	46.2	47.3	47.7	47.7	47.8	50.9	54.1	55.4	56.5	58.8	-0.00620914
138	846	B	12	3	61	63	105.62	120.46	103.758	43.8	45.2	45.9	46.1	46.6	50.5	54	55.4	56.7	59	-0.256571
138	846	B	12	3	65	67	105.66	120.5	103.797	47.2	48.6	48.8	48.5	48.4	51.2	54.2	55.3	56.3	58.4	0.0966052
138	846	B	12	3	69	71	105.7	120.54	103.837	46.1	47	47.5	47.3	47.3	50.4	53.4	54.5	55.8	58.6	-0.0184815
138	846	B	12	3	73	75	105.74	120.58	103.876	49	50.3	50.6	50.4	50.4	53.1	56.1	57.3	58.1	60.4	0.282666
138	846	B	12	3	77	79	105.78	120.62	103.915	46.5	47.4	47.5	47.2	47.1	49.9	52.9	54	55	57.4	0.0218985
138	846	B	12	3	81	83	105.82	120.66	103.954	46.7	47.3	47.4	47.1	46.9	49.6	52.6	53.8	54.9	57.5	0.0420872
138	846	B	12	3	85	87	105.86	120.7	103.993	46.5	47.7	48	47.7	47.6	50.5	53.5	54.7	55.6	57.8	0.0206539
138	846	B	12	3	89	91	105.9	120.74	104.032	44.7	46.1	46.7	46.5	46.5	50.4	53.7	55	56.1	58.2	-0.167274
138	846	B	12	3	93	95	105.94	120.78	104.071	48.4	49.7	49.9	49.4	49.1	51.8	54.7	55.6	56.4	58.6	0.21712
138	846	B	12	3	97	99	105.98	120.82	104.11	44.5	46.1	46.5	46.2	46.2	49.4	52.5	53.6	54.7	56.8	-0.189329
138	846	B	12	3	101	103	106.02	120.86	104.149	47.8	49.4	49.8	49.4	49.2	52	55	55.9	56.7	59	0.153441
138	846	B	12	3	105	107	106.06	120.9	104.188	43.7	45.2	45.4	45.2	45.1	48	51.1	52.4	53.1	55.5	-0.273821
138	846	B	12	3	109	111	106.1	120.94	104.227	43.9	45.3	45.4	45.2	44.8	47.6	50.6	51.6	52.4	55.2	-0.253631
138	846	B	12	3	113	115	106.14	120.98	104.266	47.1	47.9	48.1	47.6	47.4	50.2	53.1	54.3	54.9	57.6	0.0787335
138	846	B	12	3	117	119	106.18	121.02	104.306	48.7	49.9	49.9	49.6	49.2	51.8	54.7	55.6	56.4	59.2	0.244604
138	846	B	12	3	121	123	106.22	121.06	104.344	42.3	43.6	43.6	43.2	43	46	49.1	50	51.2	53.2	-0.421991
138	846	B	12	3	125	127	106.26	121.1	104.378	42.4	43.9	44.3	43.8	43.9	46.9	49.9	51.2	52	54.6	-0.412206
138	846	B	12	3	129	131	106.3	121.14	104.412	40.7	41.6	41.5	41	40.7	43.5	46.5	47.5	48.7	50.8	-0.589727
138	846	B	12	3	133	135	106.34	121.18	104.446	39.1	40.2	40.4	39.7	39.3	42.2	45.4	46.6	47.1	49.3	-0.756843
138	846	B	12	3	137	139	106.38	121.22	104.48	39	40.2	40.3	39.5	38.9	41.7	44.8	45.5	46.7	49.1	-0.767871
138	846	B	12	3	141	143	106.42	121.26	104.531	37.6	38.7	38.8	38.3	38	41.1	44.5	45.6	46.4	49	-0.914175
138	846	B	12	3	145	147	106.46	121.32	104.571	37	38	37.5	36.5	35.9	38.3	41.6	42.5	43.4	45.7	-0.977543
138	846	B	12	4	1	3	106.52	121.36	104.603	43.4	43.5	42.8	41.4	40.2	42.1	44.8	45.8	46.6	48.8	-0.312192
138	846	B	12	4	5	7	106.56	121.4	104.64	44.1	44.2	43.5	42.2	41.1	43.2	46	47	48	50.2	-0.239973
138	846	B	12	4	9	11	106.6	121.44	104.686	49.1	49.9	49.3	48.2	47.4	49.3	52.1	52.9	53.5	56.2	0.279696
138	846	B	12	4	13	15	106.64	121.48	104.752	47.4	48.5	48.4	47.6	47.1	49.6	52.3	53.3	54.5	56	0.102175
138	846	B	12	4	17	19	106.68	121.56	104.791	45.2	46.1	46.2	45.5	45.1	47.7	50.9	51.7	52.7	55	-0.127998
138	846	B	12	4	25	27	106.76	121.6	104.829	48.3	49.6	49.7	48.8	48.1	50.2	52.8	53.6	54.1	56.4	0.193961
138	846	B	12	4	29	31	106.8	121.64	104.874	46.2	47.7	48	47.5	47.2	50.1	53.2	54.2	54.9	56.6	-0.0251832
138	846	B	12	4	33	35	106.84	121.68	104.944	50.2	51.6	51.5	50.6	49.9	52.1	54.8	55.6	56.3	58.3	0.390428
138	846	B	12	4	37	39	106.88	121.72	104.947	49.1	49.7	49.5	48.6	47.9	50.3	53	53.9	54.7	56.7	0.275341
138	846	B	12	4	41	43	106.92	121.76	104.971	46.7	47.3	47	46	45.2	47.6	50.4	51.4	52.3	54.4	0.0249787
138	846	B	12	4	45	47	106.96	121.8	105.005	41.4	41.9	41.5	40.6	40	42.7	45.7	46.8	47.9	50.2	-0.527152
138	846	B	12	4	49	51	107	121.84	105.04	45	45.7	45.2	44	42.9	44.9	47.6	48.6	49.2	51.1	-0.153165
138	846	B	12	4	53	55	107.04	121.88	105.075	44.1	45.3	45.1	44.1	43.5	45.7	48.6	49.4	50.2	52.4	-0.247439
138	846	B	12	4	57	59	107.08	121.92	105.109	42.6	43.9	43.8	43.2	42.7	45.2	48.2	49.1	49.9	52.2	-0.404148
138	846	B	12	4	61	63	107.12	121.96	105.199	44.5	45.9	45.6	44.6	43.8	45.9	48.9	49.7	50.3	52.2	-0.20706
138	846	B	12	4	65	67	107.16	122	105.201	38.1	38.7	38.6	37.9	37.5	40.3	43.4	44.6	45.6	48.1	-0.873655
138	846	B	12	4	69	71	107.2	122.04	105.212	39.2	39.8	39.5	38.6	38.1	40.6	43.7	44.8	45.8	48	-0.759813
138	846	B	12	4	73	75	107.24	122.08	105.249	40.4	41.5	41.2	40.4	39.8	42.2	45.2	46.1	47	49.4	-0.635566
138	846	B	12	4	77	79	107.28	122.12	105.285	37.5	37.9	37.3	36.2	35.4	37.7	40.8	41.9	42.5	45.1	-0.937957
138	846	B	12	4	81	83	107.32	122.16	105.323	36.4	36.7	36	35.1	34.2	36.7	39.7	40.9	41.7	44.2	-1.05304
138	846	B	12	4	85	87	107.36	122.2	105.361	36.8	37.5	36.7	35.3	34.2	36.3	39.3	40.3	40.9	43.3	-1.01204
138	846	B	12	4	89	91	107.4	122.24	105.399	32.6	32.2	31.6	30.5	29.7	32.2	35.2	36.5	37.5	39.9	-1.44971
138	846	B	12	4	93	95	107.44	122.28	105.437	32	32	31.5	30.3	29.5	32	35.3	36.3	37.4	39.6	-1.51277
138	846	B	12	4	97	99	107.48	122.32	105.475	34.5	34.9	34.5	33.4	32.7	34.9	38.1	39	39.9	42.3	-1.25324
138	846	B	12	4	101	103	107.52	122.36	105.512	33	33.3	33	31.8	31.2	33.5	36.8	37.7	38.4	40.8	-1.40995
138	846	B	12	4	105	107	107.56	122.4	105.55	31.5	31.7	31.7	30.7	30.3	33	36.4	37.4	38.2	40.8	-1.56666
138	846	B	12	4	109	111	107.6	122.44	105.588	29.8	30.3	30.2	29.4	28.8	31.7	35	36.1	37.3	39.5	-1.74418
138	846	B	12	4	113	115	107.64	122.48	105.626	34.3	35	34.9	34.3	34	36.9	40.2	41.3	42.2	44.5	-1.27654
138	846	B	12	4	117	119	107.68	122.52	105.664	39.6	40.7	41	40.5	40.2	42.9	46.1	47.1	48.1	50.2	-0.725655
138	846	B	12	4	121	123	107.72	122.56	105.757	41.7	43	43.2	42.7	42.6	45.6	48.8	49.9	50.6	52.6	-0.507755
138	846	B	12	4	125	127	107.76	122.6	105.805	42.8	44	44.1	43.5	43.1	45.9	48.9	49.9	50.6	52.8	-0.393913
138	846	B	12	4	129	131	107.8	122.64	105.809	42.8	44.2	44.4	43.7	43.2	46	48.9	49.7	50.4	52.7	-0.394535
138	846	B	12	4	133	135	107.84	122.68	105.875	43.9	45.1	45.1	44.2	43.5	45.8	48.8	49.6	50.2	52.3	-0.280693
138	846	B	12	4	137	139	107.88	122.72	105.911	43.1	44.4	44.1	42.8	42	44.1	46.9	47.7	48	50.7	-0.364562
138	846	B	12	4	141	143	107.92	122.82	105.954	40.8	41.5	41.1	40.1	39.3	41.6	44.7	45.7	46.5	48.5	-0.605452
138	846	B	12	5	1	3	108.02	122.86	105.986	37.6	38.6	38.3	37.2	36.3	38.7	41.8	42.7	43.4	45.5	-0.939059
138	846	B	12	5	5	7	108.06	122.9	106.024	39.3	40.8	40.8	39.9	39.1	41.8	44.9	45.7	46.2	48.5	-0.762783
138	846	B	12	5	9	11	108.1	122.94	106.062	39.1	40.2	40.1	39.2	38.5	41.1	44.2	45	45.5	47.5	-0.784216
138	846	B	12	5	13	15	108.14	122.98	106.1	37.7	38.7	38.3	37	36.2	38.4	41.4	42.4	43.1	45	-0.93052
138	846	B	12	5	17	19	108.18	123.02	106.138	35.9	36	35.5	34.3	33.5	36	39	40.1	41	43.4	-1.11845
138	846	B	12	5	21	23	108.22	123.06	106.176	35.3	35.5	35	34	33.2	35.7	38.9	39.9	40.6	43.1	-1.1815
138	846	B	12	5	25	27	108.26	123.1	106.214	34.3	35	34.8	33.8	33.1	35.9	39.2	40.2	40.9	43.3	-1.28618
138	846	B	12	5	29	31	108.3	123.14	106.254	34	34.8	34.2	33	32.1	34.6	37.7	38.6	39.2	41.4	-1.31802
138	846	B	12	5	33	35	108.34	123.18	106.299	32	32.6	32	30.8	30.1	32.7	36	37.1	38	40.1	-1.52676
138	846	B	12	5	37	39	108.38	123.22	106.33	32.2	32.5	31.9	30.6	29.7	32.2	35.4	36.3	37.1	39.5	-1.50657
138	846	B	12	5	41	43	108.42	123.26	106.366	31.6	31.5	30.8	29.5	28.6	31.1	34.4	35.5	36.2	38.8	-1.56963
138	846	B	12	5	45	47	108.46	123.3	106.404	31.8	32.1	31.4	30.3	29.5	32	35.4	36.2	37.2	39.6	-1.54944
138	846	B	12	5	49	51	108.5	123.34	106.442	34.2	34.7	34	32.7	31.7	34.1	37.4	38.4	39.3	41.1	-1.30032
138	846	B	12	5	53	55	108.54	123.38	106.48	33.1	33.6	33.1	31.9	30.9	33.4	36.7	37.6	38.4	40.8	-1.41541
138	846	B	12	5	57	59	108.58	123.42	106.518	34.6	34.6	34	32.9	32.1	34.5	37.7	38.8	39.5	41.9	-1.25994
138	846	B	12	5	61	63	108.62	123.46	106.535	36.7	37.3	36.8	35.8	35.1	37.6	40.7	41.7	42.8	44.9	-1.04204
138	846	B	12	5	65	67	108.66	123.5	106.584	38.6	39.1	38.6	37.4	36.7	39.2	42.3	43.3	44	46.5	-0.844955
138	846	B	12	5	69	71	108.7	123.54	106.63	39.2	39.9	39.5	38.5	37.9	40.5	43.7	44.6	45.5	47.7	-0.783142
138	846	B	12	5	73	75	108.74	123.58	106.665	42.5	43.3	42.9	41.4	40.3	42.4	45.3	46	46.9	49.1	-0.440373
138	846	B	12	5	77	79	108.78	123.62	106.699	36.8	37.1	36.6	35.8	35.5	38.4	41.6	42.8	43.9	46.4	-1.03413
138	846	B	12	5	81	83	108.82	123.66	106.733	40.5	40.6	40	39.2	38.6	41	44.1	45.2	46.1	48.2	-0.649732
138	846	B	12	5	85	87	108.86	123.7	106.768	41.9	42.3	41.5	40.1	39	40.9	43.8	44.8	45.6	47.6	-0.504674
138	846	B	12	5	89	91	108.9	123.74	106.802	39.1	39.2	38.3	37.1	36.3	38.6	41.6	42.7	43.5	45.7	-0.796659
138	846	B	12	5	93	95	108.94	123.78	106.837	37.4	36.9	35.7	34.3	33.2	35.2	38.4	39.3	40.3	42.7	-0.97418
138	846	B	12	5	97	99	108.98	123.82	106.871	37.8	38.6	37.9	36.5	35.6	37.8	40.9	41.9	42.9	44.7	-0.933179
138	846	B	12	5	101	103	109.02	123.86	106.886	37.2	38.2	37.6	36.2	35.2	37.5	40.6	41.6	42.3	44.4	-0.996236
138	846	B	12	5	105	107	109.06	123.9	106.912	39.9	40.4	39.7	38.1	36.6	38.4	41.3	42.3	43.1	45	-0.7159
138	846	B	12	5	109	111	109.1	123.94	106.975	34.2	34.2	33.6	32.5	31.7	34.2	37.4	38.6	39.7	42.1	-1.30965
138	846	B	12	5	113	115	109.14	123.98	107.009	36.3	36.3	35.6	34.4	33.4	35.6	38.7	39.8	40.8	43.1	-1.09175
138	846	B	12	5	117	119	109.18	124.02	107.044	35.7	35.7	34.9	33.5	32.4	34.5	37.5	38.6	39.5	41.9	-1.15481
138	846	B	12	5	121	123	109.22	124.06	107.079	35.6	35.9	35.4	34.3	33.5	35.9	39.1	40.2	41.2	43.7	-1.16584
138	846	B	12	5	125	127	109.26	124.1	107.113	39.7	40	39.3	38	36.9	38.9	41.8	42.8	43.7	45.7	-0.739823
138	846	B	12	5	129	131	109.3	124.14	107.148	38.6	38.7	38.1	37	36.1	38.3	41.5	42.5	43.6	45.6	-0.85491
138	846	B	12	5	133	135	109.34	124.18	107.182	42.8	42.8	41.9	40.5	39.3	41.3	44.1	45.2	46.1	48	-0.418487
138	846	B	12	5	137	139	109.38	124.22	107.216	38.6	38.7	38.2	37.2	36.4	39	42.1	43.1	44.2	46.4	-0.856153
138	846	B	12	5	141	143	109.42	124.26	107.236	48.6	50	49	47.3	45.8	47.3	49.8	50.5	50.7	53.3	0.183807
138	846	B	12	5	145	147	109.46	124.32	107.26	45.8	46	45	43.6	42.4	44.3	46.8	47.9	48.6	51	-0.108488
138	846	B	12	6	1	3	109.52	124.36	107.308	46.2	47.3	46.6	45.1	43.7	45.3	48	48.8	49.4	50.8	-0.0674874
138	846	B	12	6	5	7	109.56	124.4	107.364	42.1	43.7	43.6	42.8	42.6	45.6	48.9	50	50.9	53.3	-0.494748
138	846	B	12	6	9	11	109.6	124.44	107.416	40.4	41.7	41.9	41.3	41.3	44.2	47.7	48.8	49.8	51.6	-0.672271
138	846	B	12	6	13	15	109.64	124.48	107.454	41.3	42	41.6	40.9	40.3	43	45.9	47.2	48.2	50.1	-0.579239
138	846	B	12	6	17	19	109.68	124.52	107.492	40.4	40.7	40.3	39.5	38.9	41.4	44.4	45.7	46.6	49.1	-0.673514
138	846	B	12	6	21	23	109.72	124.56	107.529	40.1	40.2	39.4	38.4	37.3	39.5	42.3	43.4	44.3	46.4	-0.705354
138	846	B	12	6	25	27	109.76	124.6	107.567	40.4	40.4	39.9	38.7	38	40.3	43.2	44.3	45.3	47.4	-0.674758
138	846	B	12	6	29	31	109.8	124.64	107.604	39.3	39.3	38.5	37.5	36.7	39	42.1	43.2	44.3	46.6	-0.789845
138	846	B	12	6	33	35	109.84	124.68	107.638	39.6	39.9	39.7	38.7	38.1	40.4	43.6	44.7	45.7	47.9	-0.75925
138	846	B	12	6	37	39	109.88	124.72	107.672	37.4	38	37.5	36.6	36	38.6	41.8	42.9	43.9	46.6	-0.9888
138	846	B	12	6	41	43	109.92	124.76	107.707	35.3	35	34.8	33.8	33.4	36	39.3	40.4	41.8	43.8	-1.20794
138	846	B	12	6	45	47	109.96	124.8	107.741	39.4	40.2	40.2	39.3	38.7	41.3	44.4	45.4	46.3	48.6	-0.781928
138	846	B	12	6	49	51	110	124.84	107.775	38.8	39.4	39.3	38.5	37.9	40.6	43.8	44.9	45.8	47.7	-0.844984
138	846	B	12	6	53	55	110.04	124.88	107.81	38.3	39.1	39.1	38.3	37.8	40.4	43.6	44.7	45.5	47.7	-0.897635
138	846	B	12	6	61	63	110.12	124.96	107.834	40.7	41.7	41.5	40.8	40.3	42.9	45.9	46.9	47.8	49.7	-0.64914
138	846	B	12	6	57	59	110.08	124.92	107.845	39	40.4	40.4	39.8	39.4	42.2	45.3	46.4	47.1	49	-0.825418
138	846	B	12	6	65	67	110.16	125	107.85	38.8	39.9	39.9	39.4	39.1	42.1	45.3	46.4	47.3	49.6	-0.847473
138	846	B	12	6	69	71	110.2	125.04	107.9	39.2	40.2	40.3	39.7	39.4	42.2	45.4	46.6	47.6	49.4	-0.806472
138	846	B	12	6	73	75	110.24	125.08	107.95	41.1	42.7	42.9	42.4	42.1	45	48.1	49	49.8	52	-0.609384
138	846	B	12	6	77	79	110.28	125.12	108	43	44.6	44.8	44.5	44.4	47.3	50.4	51.5	52.3	54.4	-0.412295
138	846	B	12	6	81	83	110.32	125.16	108.036	41.1	42.6	43.1	43	43.1	46.6	50	51.2	52.4	54.7	-0.610627
138	846	B	12	6	85	87	110.36	125.2	108.067	44.4	46.2	46.2	45.4	44.9	47.2	50	50.8	51.4	53.1	-0.267857
138	846	B	12	6	89	91	110.4	125.24	108.099	44.3	45.7	46.1	45.9	45.9	48.9	52.1	53.2	54.4	56.3	-0.278885
138	846	B	12	6	93	95	110.44	125.28	108.13	44.7	46.1	46.6	46.4	46.5	49.9	53.2	54.5	55.4	57.6	-0.237884
138	846	B	12	6	97	99	110.48	125.32	108.161	46.9	48.1	48.2	47.7	47.4	50.2	53.1	54.2	55	56.9	-0.00957746
138	846	B	12	6	101	103	110.52	125.36	108.178	45.7	46.5	46.4	45.7	45.1	47.6	50.5	51.3	52.1	54	-0.13507
138	846	B	12	6	105	107	110.56	125.4	108.189	43.4	44.4	44.5	44.2	44.2	47.3	50.3	51.4	52.6	54.8	-0.375026
138	846	B	12	6	109	111	110.6	125.44	108.219	43.6	45	45.1	44.9	45	48.3	51.5	52.4	53.5	55.7	-0.354836
138	846	B	12	6	113	115	110.64	125.48	108.267	44.3	45.4	45.5	44.9	44.5	47.2	50.3	51.2	52	54.2	-0.282617
138	846	B	12	6	117	119	110.68	125.52	108.314	42.7	43.9	44	43.3	42.9	45.8	48.8	49.9	50.9	52.6	-0.449733
138	846	B	12	6	121	123	110.72	125.56	108.35	39.5	40.4	40.3	39.6	39.1	41.7	44.8	46	47	49	-0.783342
138	846	B	12	6	125	127	110.76	125.6	108.381	33.9	34.9	34.9	34.5	34.4	37.7	41.2	42.4	43.5	45.7	-1.36669
138	846	B	12	6	129	131	110.8	125.64	108.407	37.4	38.3	38.1	37.4	36.9	39.7	42.8	44	44.8	47	-1.00311
138	846	B	12	6	133	135	110.84	125.68	108.415	36.1	36.7	36.5	35.5	35	37.6	40.8	41.8	42.7	44.8	-1.13901
138	846	B	12	6	137	139	110.88	125.72	108.466	34.5	35.8	35.8	35.2	34.9	38.2	41.7	42.8	43.8	45.9	-1.30612
138	846	B	12	6	141	143	110.92	125.76	108.506	38.1	38.9	38.8	37.8	37.1	39.7	42.7	43.6	44.4	46.5	-0.932134
138	846	B	12	6	145	147	110.96	125.82	108.553	36.1	37	37.1	36.6	36.2	39.3	42.6	43.6	44.5	46.3	-1.14118
138	846	B	12	7	1	3	111.02	125.86	108.584	33.6	34.5	34.2	33.4	32.7	35.3	38.4	39.3	40.2	42.4	-1.40195
138	846	B	12	7	5	7	111.06	125.9	108.616	35.3	35.8	35.4	34.6	34.2	36.7	40	41.1	41.9	43.8	-1.22567
138	846	B	12	7	9	11	111.1	125.94	108.647	38.2	38.4	37.6	36.1	34.6	36.5	39.4	40.3	41.1	42.8	-0.924528
138	846	B	12	7	13	15	111.14	125.98	108.679	41.9	42.3	41.8	40.5	39.1	41	43.7	44.7	45.2	47.5	-0.540134
138	846	B	12	7	17	19	111.18	126.02	108.71	40.3	41.6	40.8	39.4	38.4	40.2	43	44.1	44.6	46.2	-0.70725
138	846	B	12	7	21	23	111.22	126.06	108.741	40.2	41.3	40.9	39.3	37.9	39.8	42.8	43.6	44.1	45.9	-0.718277
138	846	B	12	7	25	27	111.26	126.1	108.773	41.7	42.5	42.1	40.8	39.7	41.8	44.7	45.6	46.2	48.2	-0.562812
138	846	B	12	7	29	31	111.3	126.14	108.804	43.2	43.8	43.4	42.2	41.3	43.4	46.3	47.1	48.1	50	-0.407346
138	846	B	12	7	33	35	111.34	126.18	108.836	38.3	39.1	38.9	37.9	37.1	39.8	42.8	43.8	44.6	46.7	-0.917855
138	846	B	12	7	37	39	111.38	126.22	108.867	47.2	48.1	47.8	46.7	45.9	48.4	51.1	52	52.8	55.1	0.00764202
138	846	B	12	7	41	43	111.42	126.26	108.901	50.2	50.9	50.7	49.7	49	51.3	54	54.9	55.7	58	0.319195
138	846	B	12	7	45	47	111.46	126.3	108.937	52.4	53.2	52.7	51.7	50.7	52.6	55.1	55.9	56.8	59	0.5475
138	846	D	12	5	65	67	112.96	126.46	108.945	36.5	39	39.9	39.6	39.4	42	44.9	45.5	45.4	46.2	-0.463176
138	846	D	12	5	69	71	113	126.5	108.982	41.9	44.4	44.6	43.6	42.3	43.8	46.1	46.4	46.3	46.6	0.152997
138	846	D	12	5	73	75	113.04	126.54	109.019	41.1	43.2	43.4	42.3	41	42.3	44.6	45.1	44.8	45.2	0.0602811
138	846	D	12	5	77	79	113.08	126.58	109.057	36.4	38.6	38.6	37.8	36.8	38.6	41	41.7	41.5	42.2	-0.47835
138	846	D	12	5	81	83	113.12	126.62	109.094	34.6	36.9	37.3	36.7	36	38.4	41.1	41.7	41.6	42.8	-0.685402
138	846	D	12	5	85	87	113.16	126.66	109.131	35	37	37.2	36.2	35.3	37.1	39.6	40.1	39.9	40.6	-0.640915
138	846	D	12	5	89	91	113.2	126.7	109.161	35	37.5	37.8	37.2	36.3	38.2	40.8	41.3	41.1	41.9	-0.64216
138	846	D	12	5	93	95	113.24	126.74	109.188	35.7	38.3	38.8	38.2	37.6	39.7	42.3	42.9	42.8	43.3	-0.563371
138	846	D	12	5	97	99	113.28	126.78	109.214	35.7	38.2	38.7	38	37.4	39.4	42	42.5	42.4	43	-0.564617
138	846	D	12	5	101	103	113.32	126.82	109.243	34.4	37.5	38.3	37.8	37.5	39.9	42.7	43.3	43.1	43.7	-0.714503
138	846	D	12	5	105	107	113.36	126.86	109.282	32.4	34.8	35.4	34.8	34.3	36.6	39.4	39.9	40	40.7	-0.944423
138	846	D	12	5	109	111	113.4	126.9	109.319	33.1	35.4	35.9	35.6	35.2	37.5	40.3	40.9	40.9	41.8	-0.865633
138	846	D	12	5	113	115	113.44	126.94	109.358	33.7	36.6	37.4	37.1	36.9	39.4	42.2	42.8	42.8	43.8	-0.798278
138	846	D	12	5	117	119	113.48	126.98	109.396	35.2	37.3	37.8	37.4	36.8	39	41.7	42.3	42.2	42.9	-0.628019
138	846	D	12	5	121	123	113.52	127.02	109.435	36.6	39.2	40	39.6	39.3	41.6	44.3	44.8	44.8	45.5	-0.469193
138	846	D	12	5	125	127	113.56	127.06	109.472	34.8	37.6	38.5	38.3	38.1	40.8	43.6	44.1	44	44.8	-0.676247
138	846	D	12	5	129	131	113.6	127.1	109.511	34.2	36.7	37.3	36.9	36.5	39	41.8	42.3	42.3	43.1	-0.746095
138	846	D	12	5	133	135	113.64	127.14	109.549	35.6	38.6	39.2	38.6	38.1	40.4	43.1	43.5	43.3	43.7	-0.58727
138	846	D	12	6	1	3	113.82	127.32	109.721	32.3	34.2	34.6	34	33.5	35.9	38.7	39.2	39.4	40.1	-0.970191
138	846	D	12	6	5	7	113.86	127.36	109.76	33.7	36	36.4	35.9	35.5	38	40.8	41.5	41.6	42.3	-0.811366
138	846	D	12	6	9	11	113.9	127.4	109.798	32.2	34.4	34.7	34.2	33.8	36.3	39.1	39.7	39.9	40.8	-0.984118
138	846	D	12	6	13	15	113.94	127.44	109.835	34.4	36.1	36.2	35.4	34.8	36.8	39.5	40.3	40.3	41	-0.733823
138	846	D	12	6	17	19	113.98	127.48	109.873	37.3	39.1	39	37.9	36.8	38.4	41	41.5	41.4	42	-0.403492
138	846	D	12	6	21	23	114.02	127.52	109.91	35	37.2	37.3	36.4	35.6	37.5	40.2	40.8	40.6	41.5	-0.667714
138	846	D	12	6	25	27	114.06	127.56	109.947	36.8	38.2	38.1	37.1	36.1	37.9	40.4	41	41.1	41.7	-0.463154
138	846	D	12	6	29	31	114.1	127.6	109.985	31.3	32.7	33	32.6	32.4	35.3	38.3	39.3	39.7	40.6	-1.09325
138	846	D	12	6	33	35	114.14	127.64	110.04	38.7	40.9	41.5	41.1	40.8	43.2	45.9	46.6	46.9	47.8	-0.248407
138	846	D	12	6	37	39	114.18	127.68	110.094	39	40.7	40.9	40.5	40	42.1	44.8	45.4	45.7	46.8	-0.215351
138	846	D	12	6	41	43	114.22	127.72	110.147	41.1	42.9	43.2	42.5	42	44	46.5	47	47.2	47.8	0.0235103
138	846	D	12	6	45	47	114.26	127.76	110.202	39.9	40.8	40.6	39.6	38.8	40.6	43	43.6	43.8	44.6	-0.114941
138	846	D	12	6	49	51	114.3	127.8	110.257	37	37.9	37.8	37.1	36.5	38.5	41.2	42	42.4	43.4	-0.447765
138	846	D	12	6	53	55	114.34	127.84	110.31	43.2	45.6	45.6	44.4	43.2	44.7	47	47.3	47.3	48	0.259878
138	846	D	12	6	57	59	114.38	127.88	110.365	43	44.8	44.9	44.1	43.3	45.1	47.6	48.1	48.1	48.5	0.235765
138	846	D	12	6	61	63	114.42	127.92	110.419	47.6	50.3	50.5	49.4	48.1	49.4	51.5	51.7	51.3	51.8	0.760468
138	846	D	12	6	65	67	114.46	127.96	110.473	44.6	46.4	46.6	45.8	45.1	46.8	49.2	49.8	49.9	50.8	0.416211
138	846	D	12	6	69	71	114.5	128	110.509	44.1	46.5	46.9	46.2	45.5	47.3	49.7	50.2	50.3	51.1	0.357796
138	846	D	12	6	73	75	114.54	128.04	110.542	43	45.5	45.8	45.2	44.5	46.3	48.7	49.2	49.2	50	0.230779
138	846	D	12	6	77	79	114.58	128.08	110.572	43.2	45.9	46.4	45.9	45.4	47.3	49.8	50.2	50.2	50.9	0.252399
138	846	D	12	6	81	83	114.62	128.12	110.603	43.8	46.5	47.1	46.8	46.5	48.5	50.9	51.4	51.5	52.4	0.319756
138	846	D	12	6	85	87	114.66	128.16	110.634	47.3	50.7	51.7	51.6	51.7	53.9	56.4	57	56.8	57.3	0.718689
138	846	D	12	6	89	91	114.7	128.2	110.665	45.4	47.9	48.5	48.4	48.2	50.3	52.7	53.1	53.2	53.6	0.500202
138	846	D	12	6	93	95	114.74	128.24	110.696	48.1	51	51.6	51.2	50.8	52.5	54.9	55.3	55.2	55.5	0.807665
138	846	B	13	1	53	55	112.04	128.49	110.722	51.1	51.7	51.4	50.6	50	52.2	54.8	55.8	56.7	58.7	0.378164
138	846	D	12	6	97	99	114.78	128.28	110.727	48.3	50.5	50.9	50.6	50.4	52.3	54.7	55.3	55.5	56.1	0.829286
138	846	B	13	1	57	59	112.08	128.53	110.753	53	53.8	53.5	52.5	51.9	53.9	56.5	57.3	58.2	60.1	0.575253
138	846	D	12	6	101	103	114.82	128.32	110.758	46.5	49.2	50	50	50	52.3	54.9	55.6	55.7	56.6	0.622233
138	846	B	13	1	61	63	112.12	128.57	110.784	53.8	55.3	55.2	54.3	53.8	56.1	58.7	59.6	60.3	61.9	0.657877
138	846	B	13	1	65	67	112.16	128.61	110.815	52.4	54.2	53.7	52.7	51.9	53.8	56.3	57.4	57.5	59.6	0.511574
138	846	B	13	1	69	71	112.2	128.65	110.846	49.6	51.4	51.4	50.4	49.8	52.2	54.9	55.9	56.3	58.1	0.219588
138	846	B	13	1	73	75	112.24	128.69	110.877	51.1	53.1	52.9	51.8	50.9	52.8	55.5	56.2	56.7	58.4	0.375054
138	846	B	13	1	77	79	112.28	128.73	110.908	51.1	53	52.7	51.5	50.4	52	54.5	55.3	55.7	57.1	0.374431
138	846	B	13	1	81	83	112.32	128.77	110.939	48.3	50.2	50.1	49.3	48.8	51.1	53.9	54.9	55.3	57.2	0.082446
138	846	B	13	1	85	87	112.36	128.81	110.97	42.4	42.7	42.2	41.5	41.2	43.6	46.6	47.8	48.9	50.8	-0.53212
138	846	B	13	1	89	91	112.4	128.85	111.001	45.2	46.4	46.1	45.5	45.1	47.7	50.6	51.6	52.5	54.1	-0.241378
138	846	B	13	1	93	95	112.44	128.89	111.032	50.5	51.6	51.4	50.3	49.4	51.3	54.1	54.6	55	57.2	0.309508
138	846	B	13	1	97	99	112.48	128.93	111.063	47.5	48.9	48.4	47.4	46.7	48.8	51.5	52.2	52.6	54.6	-0.00328851
138	846	B	13	1	101	103	112.52	128.97	111.094	48	49.1	49.1	48.3	47.8	49.9	52.6	53.6	54.1	55.6	0.048118
138	846	B	13	1	105	107	112.56	129.01	111.125	46.1	47.9	47.8	47	46.5	48.8	51.6	52.7	52.9	55.2	-0.150215
138	846	B	13	1	109	111	112.6	129.05	111.156	43.8	44.9	44.7	44	43.6	46	49	50.1	50.9	53.1	-0.390171
138	846	B	13	1	113	115	112.64	129.09	111.188	41.7	42	41.7	41.1	40.7	43.1	46.2	47.4	48.1	50.2	-0.609315
138	846	B	13	1	117	119	112.68	129.13	111.219	41.9	42.5	42.5	41.9	41.4	44	46.9	48.1	48.8	51.1	-0.589126
138	846	B	13	1	121	123	112.72	129.17	111.25	40.6	41.5	41.6	41.2	41.1	44.2	47.4	48.6	49.9	52.4	-0.725024
138	846	B	13	1	125	127	112.76	129.21	111.281	39.9	40	39.8	39.2	39.1	41.9	45.1	46.3	47.4	50.3	-0.798487
138	846	B	13	1	129	131	112.8	129.25	111.312	42.9	43.7	43.9	43.6	43.4	46.5	49.7	50.8	52.1	54.1	-0.486934
138	846	B	13	1	133	135	112.84	129.29	111.343	43.6	44.3	44.6	44.3	44.2	47.1	50.1	51.4	52.4	54.4	-0.414715
138	846	B	13	1	137	139	112.88	129.33	111.374	44	45	45.2	44.8	44.7	47.6	50.6	51.7	52.9	54.9	-0.373714
138	846	B	13	1	141	143	112.92	129.37	111.405	41	42.3	42.7	42.5	42.5	45.4	48.5	49.7	50.6	52.4	-0.686511
138	846	B	13	1	145	147	112.96	129.41	111.436	42.1	43.1	43.5	43.1	42.9	46	49	50.2	51.1	53.3	-0.572669
138	846	B	13	2	1	3	113.02	129.47	111.483	46.9	46.8	46.5	46	45.8	48.3	51.1	52.3	53.2	55.5	-0.0741231
138	846	B	13	2	5	7	113.06	129.51	111.514	46.8	47.5	47.6	47	46.9	49.5	52.4	53.4	54.6	56.5	-0.0851509
138	846	B	13	2	9	11	113.1	129.55	111.546	43.9	45.4	45.5	45.3	45.3	48.2	51.4	52.5	53.2	55.6	-0.387542
138	846	B	13	2	13	15	113.14	129.59	111.577	42.4	44.1	44.5	44.2	44.3	47.5	50.6	52	52.5	54.8	-0.544252
138	846	B	13	2	17	19	113.18	129.63	111.608	44.8	45.5	45.6	44.9	44.6	47	50	51	51.6	53.6	-0.295133
138	846	B	13	2	21	23	113.22	129.67	111.64	44.8	45.5	45.5	44.9	44.5	46.8	49.8	50.8	51.9	53.3	-0.295755
138	846	B	13	2	25	27	113.26	129.71	111.677	44	44.8	44.5	44.1	43.7	46.2	49.3	50.1	51.4	53	-0.379624
138	846	B	13	2	29	31	113.3	129.75	111.714	48.6	49.4	49.3	48.5	47.8	50.2	52.7	53.9	54.5	56.4	0.0984222
138	846	B	13	2	33	35	113.34	129.79	111.743	49.8	50.5	50.4	49.3	48.7	50.8	53.4	54.3	55.2	56.7	0.22267
138	846	B	13	2	37	39	113.38	129.83	111.787	49.7	51	50.7	49.9	49.1	51	53.6	54.2	55.2	56.6	0.211642
138	846	B	13	2	41	43	113.42	129.87	111.818	54.2	54.8	54.6	54.2	53.7	55.8	58.4	59.1	60	62	0.679282
138	846	B	13	2	45	47	113.46	129.91	111.858	49.9	51	51	50.4	50.1	52.5	55.2	56.3	57.2	59.3	0.231208
138	846	B	13	2	49	51	113.5	129.95	111.893	44.8	45.9	46.3	46.2	46.5	50.1	53.5	55	56.5	58.9	-0.30011
138	846	B	13	2	53	55	113.54	129.99	111.928	48.3	49.4	49.4	48.8	48.4	51.1	54	55	55.8	58.2	0.0634719
138	846	B	13	2	57	59	113.58	130.03	111.964	53.5	54.1	53.9	53.1	52.4	54.3	56.8	57.5	58.5	59.9	0.603953
138	846	B	13	2	61	63	113.62	130.07	112.003	51.3	51.8	51.5	50.7	50.2	52.3	55.1	55.9	57	58.5	0.374403
138	846	B	13	2	65	67	113.66	130.11	112.035	51.1	52.3	52.1	51.3	50.8	52.9	55.6	56.5	57.2	59.1	0.352968
138	846	B	13	2	69	71	113.7	130.15	112.07	50.1	51	51.2	50.5	50	52.5	55.4	56.4	57.1	59.4	0.248288
138	846	B	13	2	73	75	113.74	130.19	112.106	48.3	49.4	48.9	48.3	47.7	50.1	53	53.8	54.9	57	0.0603605
138	846	B	13	2	77	79	113.78	130.23	112.142	47.4	48.8	48.7	47.9	47.3	49.6	52.3	53.3	53.7	56.1	-0.0339139
138	846	B	13	2	81	83	113.82	130.27	112.177	42.9	43.9	44	43.6	43.5	46.6	49.9	51.1	51.9	54.7	-0.502798
138	846	B	13	2	85	87	113.86	130.31	112.212	48.2	49.9	50.4	49.9	49.7	52.7	55.7	56.7	57.5	59.4	0.0480893
138	846	B	13	2	89	91	113.9	130.35	112.248	46.1	47.2	47.1	46.5	45.9	48.3	50.8	51.9	52.5	54.7	-0.171056
138	846	B	13	2	93	95	113.94	130.39	112.299	47.9	48.6	48.3	47.7	47	49.3	52.1	53	53.9	56	0.015627
138	846	B	13	2	97	99	113.98	130.43	112.319	45	46.5	46.5	46	45.7	48.4	51.6	52.3	53.6	55.3	-0.286764
138	846	B	13	2	101	103	114.02	130.47	112.355	47.4	48.3	48.8	48.4	48.3	51.1	54.2	55.2	55.9	57.7	-0.0376464
138	846	B	13	2	105	107	114.06	130.51	112.396	46.4	47.5	47.7	47.2	47.1	49.8	52.7	53.8	54.7	56.4	-0.142326
138	846	B	13	2	109	111	114.1	130.55	112.438	47.3	48.7	48.4	47.8	47.5	50.1	52.9	53.8	54.7	56.8	-0.0492965
138	846	B	13	2	113	115	114.14	130.59	112.477	44.4	45.5	45.7	45.1	45	47.7	50.7	51.7	52.7	55.1	-0.351687
138	846	B	13	2	117	119	114.18	130.63	112.51	44.2	44.8	44.6	43.8	43.3	45.8	48.7	49.6	50.7	52.6	-0.373122
138	846	B	13	2	121	123	114.22	130.67	112.543	43.5	43.9	43.5	42.7	42.2	44.7	47.6	48.6	49.3	51.2	-0.446584
138	846	B	13	2	125	127	114.26	130.71	112.566	41.7	41.6	41.5	40.7	40.2	42.6	45.8	46.7	47.8	50	-0.634512
138	846	B	13	2	129	131	114.3	130.75	112.586	39.5	40.5	40.4	39.8	39.9	43	46.5	47.6	48.7	51.2	-0.864062
138	846	B	13	2	133	135	114.34	130.79	112.637	39.7	41.2	41.3	40.7	40.8	43.7	47	48.2	49.1	51.3	-0.843872
138	846	B	13	2	137	139	114.38	130.83	112.668	37.8	38.9	38.9	38.5	38.5	41.7	45	46.3	47.4	49.7	-1.04221
138	846	B	13	2	141	143	114.42	130.87	112.7	39.5	40.4	40.4	40	40.2	43.2	46.4	47.5	48.6	50.9	-0.865929
138	846	B	13	2	145	147	114.46	130.91	112.731	41.8	43.1	43.3	43.2	43.6	46.9	50.3	51.6	52.7	54.7	-0.627217
138	846	B	13	3	1	3	114.52	130.97	112.778	45.4	47.1	46.9	46	45.5	47.8	50.8	51.9	52.5	54.1	-0.25354
138	846	B	13	3	5	7	114.56	131.01	112.798	47.4	48.9	48.7	47.6	46.6	48.5	51	51.6	52.1	53.6	-0.0460454
138	846	B	13	3	9	11	114.6	131.05	112.836	41.3	41.2	40.7	40.1	39.5	41.9	44.8	46.1	46.8	48.8	-0.681423
138	846	B	13	3	13	15	114.64	131.09	112.872	43.3	45	44.8	43.6	42.9	44.9	47.7	48.5	48.9	50.7	-0.473929
138	846	B	13	3	17	19	114.68	131.13	112.904	39.4	40.6	40.5	39.8	39.5	42.3	45.5	46.6	47.5	49.7	-0.880377
138	846	B	13	3	21	23	114.72	131.17	112.935	38.6	39.5	39.5	38.8	38.3	41	44.1	45.3	46.3	48.3	-0.964246
138	846	B	13	3	25	27	114.76	131.21	112.967	38.3	39.1	38.9	38.3	37.9	40.8	44	45	46.1	48.2	-0.996086
138	846	B	13	3	29	31	114.8	131.25	112.999	41.3	42.1	42.4	41.7	41.6	44.3	47.5	48.6	49.5	51.4	-0.684533
138	846	B	13	3	33	35	114.84	131.29	113.031	38.5	39.4	39.9	39.4	39.3	42.7	46	47.2	48.4	49.9	-0.976518
138	846	B	13	3	37	39	114.88	131.33	113.066	36	36.9	37.4	37	37.3	41.1	44.7	46.3	47.7	49.8	-1.23729
138	846	B	13	3	41	43	114.92	131.37	113.1	44.6	46.5	46.6	46.1	45.6	48.3	51.1	52.3	52.6	54.9	-0.343008
138	846	B	13	3	45	47	114.96	131.41	113.126	50	52.2	52.5	52	51.7	54.1	57.1	57.8	58.4	60.4	0.218285
138	846	B	13	3	49	51	115	131.45	113.153	45.6	48	48.4	48.1	48.1	51.3	54.4	55.5	55.9	58.3	-0.240194
138	846	B	13	3	53	55	115.04	131.49	113.203	41.3	41.7	41.7	41.4	41.5	44.5	47.7	49	50.2	52.8	-0.688265
138	846	B	13	3	57	59	115.08	131.53	113.238	46.3	47.9	48.2	47.9	47.8	50.5	53.5	54.6	55.4	57	-0.168597
138	846	B	13	3	61	63	115.12	131.57	113.272	46	47.6	48.1	47.9	47.9	50.8	53.8	54.9	55.7	57.7	-0.200436
138	846	B	13	3	65	67	115.16	131.61	113.305	40.7	41.8	42.1	42	42.2	45.3	48.6	49.8	50.9	53.1	-0.752568
138	846	B	13	3	69	71	115.2	131.65	113.338	34.7	35.5	35.8	35.8	36.1	39.6	43.2	44.6	45.6	47.6	-1.37754
138	846	B	13	3	73	75	115.24	131.69	113.37	29	30.4	31.3	31.7	32.8	38.7	43.6	45.9	47.8	50.4	-1.97129
138	846	B	13	3	77	79	115.28	131.73	113.402	26.3	26.9	27.3	27.5	28.2	32.8	37	38.9	40.5	43.1	-2.25287
138	846	B	13	3	81	83	115.32	131.77	113.433	25.4	25.8	26.3	26.6	27.4	31.9	36	37.7	39.2	41.5	-2.34715
138	846	B	13	3	85	87	115.36	131.81	113.461	22.5	22.8	23.2	23.6	24.5	29.2	33.6	35.3	36.8	39.3	-2.64954
138	846	B	13	3	89	91	115.4	131.85	113.488	24.8	25.6	26.3	26.7	27.6	32.1	36.2	37.9	39.2	41.3	-2.41083
138	846	B	13	3	93	95	115.44	131.89	113.515	23.9	24.4	25	25.5	26.3	31.3	35.7	37.5	38.9	41.5	-2.5051
138	846	B	13	3	97	99	115.48	131.93	113.542	22.7	23.2	23.8	24.1	24.8	29.6	33.8	35.6	37.1	39.7	-2.63059
138	846	B	13	3	101	103	115.52	131.97	113.587	26.8	27.9	28.7	29.2	30.1	34.8	39.2	40.9	42.3	44.5	-2.20458
138	846	B	13	3	105	107	115.56	132.01	113.61	21.6	22	22.5	22.7	23.5	28.2	32.5	34.4	35.8	38.1	-2.7463
138	846	B	13	3	109	111	115.6	132.05	113.655	23.3	23.3	23.9	24.2	25.2	30.4	35	37	38.7	41.5	-2.57002
138	846	B	13	3	113	115	115.64	132.09	113.706	23.8	24.4	25.1	25.5	26.5	31.4	35.8	37.5	39	41.7	-2.51862
138	846	B	13	3	117	119	115.68	132.13	113.744	23.1	23.6	24.3	24.7	25.5	30.4	34.8	36.4	37.9	40.3	-2.59208
138	846	B	13	3	121	123	115.72	132.17	113.782	23.2	23.7	24.3	24.6	25.5	30.4	34.7	36.3	37.9	40.4	-2.5823
138	846	B	13	3	125	127	115.76	132.21	113.82	24.1	25	25.9	26.3	27.2	32.2	36.6	38.4	40	42.5	-2.48927
138	846	B	13	3	129	131	115.8	132.25	113.858	25.1	25.8	26.6	27.1	28.2	33.3	37.7	39.6	41	43.3	-2.38583
138	846	B	13	3	133	135	115.84	132.29	113.896	27.1	28.1	28.8	29.4	30.5	35.5	39.9	41.7	43.2	45.4	-2.17834
138	846	B	13	3	137	139	115.88	132.33	113.935	29.8	30.8	31.5	31.8	32.6	36.9	40.9	42.3	43.4	45.6	-1.898
138	846	B	13	3	141	143	115.92	132.37	113.973	27.8	28.8	29.3	29.6	30.4	34.6	38.5	39.9	41.2	43.5	-2.10674
138	846	B	13	3	145	147	115.96	132.41	114.012	30.4	31.5	32.2	32.6	33.6	38	42.1	43.8	45.1	47.5	-1.83681
138	846	B	13	4	1	3	116.02	132.47	114.07	30.2	31.7	32.6	33	34.2	39.1	43.4	45.2	46.4	48.9	-1.85856
138	846	B	13	4	5	7	116.06	132.51	114.092	29	30.2	31	31.1	31.9	36.3	40.4	42.1	43.4	45.6	-1.98405
138	846	B	13	4	9	11	116.1	132.55	114.139	31.8	33.5	34.4	34.8	35.7	39.9	43.8	45.2	46.3	48.6	-1.69331
138	846	B	13	4	13	15	116.14	132.59	114.186	29.9	31.4	32	32.2	32.9	36.6	40.3	41.5	42.6	44.9	-1.89164
138	846	B	13	4	17	19	116.18	132.63	114.224	28	29.3	30	30.4	31.3	36	40.1	41.7	43	45.5	-2.08997
138	846	B	13	4	21	23	116.22	132.67	114.263	28.7	29.8	30.5	30.9	31.8	36.1	40.2	41.6	43.1	44.9	-2.01775
138	846	B	13	4	25	27	116.26	132.71	114.302	25.7	26.1	26.6	26.9	27.7	32	36.2	38	39.1	42	-2.33055
138	846	B	13	4	29	31	116.3	132.75	114.341	27.5	28.5	29.1	29.4	30.3	34.7	38.9	40.5	41.9	44.8	-2.14387
138	846	B	13	4	33	35	116.34	132.79	114.38	29.9	31	31.4	31.7	32.3	36.5	40.4	42	43.1	45.5	-1.89475
138	846	B	13	4	37	39	116.38	132.83	114.42	32.8	33.9	34.3	34.3	34.8	38.5	42.1	43.5	44.4	46.7	-1.5936
138	846	B	13	4	41	43	116.42	132.87	114.459	30.1	31.5	31.8	32.2	32.8	37.3	41.2	42.9	44.2	46.7	-1.87518
138	846	B	13	4	45	47	116.46	132.91	114.499	35.5	36.5	36.9	37	37.5	41.3	44.8	46.1	47.4	49.5	-1.31389
138	846	B	13	4	49	51	116.5	132.95	114.538	34.5	35.5	35.9	36	36.3	40.1	43.7	45.2	46.5	48.7	-1.41857
138	846	B	13	4	53	55	116.54	132.99	114.578	38.3	39.5	39.9	39.8	39.8	43	46.2	47.5	48.5	50.2	-1.02377
138	846	B	13	4	57	59	116.58	133.03	114.619	39.7	41.7	42.4	42.6	43.1	47	50.6	52	52.8	55.1	-0.878711
138	846	B	13	4	61	63	116.62	133.07	114.659	42.3	43.5	44	43.8	43.9	47.4	50.7	51.8	52.9	54.9	-0.608781
138	846	B	13	4	65	67	116.66	133.11	114.697	39.4	40.5	40.9	40.7	41	45	48.4	49.9	51.1	53.5	-0.911172
138	846	B	13	4	69	71	116.7	133.15	114.735	50	50.8	50.7	49.8	49	51.2	53.9	54.8	55.5	57.5	0.191224
138	846	B	13	4	73	75	116.74	133.19	114.779	52.9	53.2	52.8	51.6	50.6	52.4	54.9	55.6	56.3	58.4	0.49237
138	846	B	13	4	77	79	116.78	133.23	114.819	56.9	57.9	57.4	56.3	55.2	56.8	59	59.6	60.1	62.1	0.907981
138	846	B	13	4	81	83	116.82	133.27	114.858	55.4	55.9	55.5	54.5	53.6	55.7	58.2	59	59.7	61.5	0.751272
138	846	B	13	4	85	87	116.86	133.31	114.9	51	52.4	52.6	52	52	55.3	58.3	59.5	60.3	62.5	0.292794
138	846	B	13	4	89	91	116.9	133.35	114.941	59.1	59.9	59.4	58.4	57.5	59.4	61.7	62.5	63.2	64.9	1.13504
138	846	B	13	4	93	95	116.94	133.39	114.981	58.2	58.8	58.2	56.9	55.7	57.1	59.3	59.9	60.3	61.7	1.04077
138	846	B	13	4	97	99	116.98	133.43	115.022	51.9	52.1	51.7	50.9	50.2	52.2	54.7	55.6	56.4	58.4	0.384579
138	846	B	13	4	101	103	117.02	133.47	115.062	50	51.7	51.7	51.2	51	53.6	56.5	57.6	58.2	59.6	0.186247
138	846	B	13	4	105	107	117.06	133.51	115.106	43.7	45.3	45.5	45.3	45.3	48.4	51.5	52.7	53.6	55.3	-0.469943
138	846	B	13	4	109	111	117.1	133.55	115.145	47.6	48.9	48.9	48.2	47.6	49.6	52.4	53.2	53.7	55.5	-0.0647377
138	846	B	13	4	113	115	117.14	133.59	115.184	42.9	44.1	44.4	44	43.8	46.7	49.7	50.8	51.6	53.7	-0.554434
138	846	B	13	4	117	119	117.18	133.63	115.23	41.4	42.5	43.1	43	43.1	46.5	49.7	50.9	52	54.2	-0.711144
138	846	B	13	4	121	123	117.22	133.67	115.265	39.9	41.3	41.7	41.5	41.5	44.7	47.9	49	50.1	52	-0.867853
138	846	B	13	4	125	127	117.26	133.71	115.306	39.3	40.3	40.6	40.4	40.5	43.8	47	48.3	49.3	51.4	-0.930911
138	846	B	13	4	129	131	117.3	133.75	115.353	40.4	41.3	41.5	41.1	41	44	47.1	48.3	49.3	51.4	-0.817069
138	846	B	13	4	133	135	117.34	133.79	115.38	37.7	39.2	40.1	40.2	40.8	45.4	49.2	50.9	52.1	54.2	-1.09865
138	846	B	13	4	137	139	117.38	133.83	115.42	41.3	42.9	43.3	42.9	42.8	46.1	49.3	50.4	51.5	53.5	-0.72466
138	846	B	13	4	141	143	117.42	133.87	115.459	38.8	40.1	40.6	40.4	40.5	44.2	47.6	48.9	49.9	52	-0.985427
138	846	B	13	4	145	147	117.46	133.91	115.498	40.5	41.7	42.2	42	42	45.2	48.4	49.5	50.3	52.2	-0.809151
138	846	B	13	5	1	3	117.52	133.97	115.557	39.4	40.8	41.5	41.4	41.7	45.6	49.1	50.6	51.7	53.5	-0.924548
138	846	B	13	5	5	7	117.56	134.01	115.597	41.6	42.7	43.1	43.1	43.3	46.8	50	51.3	52.5	54.7	-0.696242
138	846	B	13	5	9	11	117.6	134.05	115.636	41.4	42.9	43.5	43.6	44.1	47.8	51.1	52.3	53.3	55.4	-0.717676
138	846	B	13	5	13	15	117.64	134.09	115.68	45.6	46.9	47.6	47.6	47.8	51.1	54.1	55.4	56.3	58.2	-0.281253
138	846	B	13	5	17	19	117.68	134.13	115.739	41.9	43.3	44	44.1	44.6	48.4	51.9	53.2	54.4	56.6	-0.666891
138	846	B	13	5	21	23	117.72	134.17	115.766	43.4	44.6	44.8	44.7	45	48.3	51.4	52.8	54	56.2	-0.511425
138	846	B	13	5	25	27	117.76	134.21	115.794	43.7	45.3	46.1	46.4	47.1	51.3	54.8	56.4	57.7	60	-0.48083
138	846	B	13	5	29	31	117.8	134.25	115.834	41.4	43	44	44.4	45.3	50	53.8	55.5	56.8	59.1	-0.720786
138	846	B	13	5	33	35	117.84	134.29	115.873	44.5	46.1	46.9	47	47.5	51.2	54.6	56	57.1	59.4	-0.398828
138	846	B	13	5	37	39	117.88	134.33	115.912	46.4	47.8	48.2	48.1	48.2	51.7	54.9	56.1	56.8	59.1	-0.201739
138	846	B	13	5	41	43	117.92	134.37	115.951	44.4	45.4	45.5	45.2	45.1	48.1	51	52.1	52.9	55	-0.410478
138	846	B	13	5	45	47	117.96	134.41	115.991	45.4	46.4	46.5	46.2	46.1	48.9	51.8	52.9	54.1	56.1	-0.307041
138	846	B	13	5	49	51	118	134.45	116.03	46.1	47.4	47.7	47.4	47.3	50.1	53	54.1	55	57	-0.234822
138	846	B	13	5	53	55	118.04	134.49	116.069	41.9	43.2	43.8	43.8	44.2	48.2	51.6	53.1	54.3	56.4	-0.67249
138	846	B	13	5	57	59	118.08	134.53	116.109	41.9	43	43.4	43.2	43.2	46.5	49.7	50.9	51.9	54.1	-0.673112
138	846	B	13	5	61	63	118.12	134.57	116.149	42.5	43.7	43.9	43.5	43.4	46.3	49.5	50.6	51.4	53.3	-0.611299
138	846	B	13	5	65	67	118.16	134.61	116.188	38.2	39.2	39.4	39.1	39	42.2	45.3	46.4	47.3	49.3	-1.05937
138	846	B	13	5	69	71	118.2	134.65	116.227	39.3	41	41.5	41.2	41.3	44.7	48	49.2	49.8	51.6	-0.94553
138	846	B	13	5	73	75	118.24	134.69	116.266	37.9	38.9	39.2	38.9	38.8	42.1	45.1	46.3	47.4	49.5	-1.09183
138	846	B	13	5	77	79	118.28	134.73	116.305	36.8	37.6	37.4	36.7	36.3	39.1	42.3	43.3	44.3	46.4	-1.20692
138	846	B	13	5	81	83	118.32	134.77	116.344	40.1	41	41.1	40.5	40.2	43	46.1	47.2	48.1	50.2	-0.86415
138	846	B	13	5	85	87	118.36	134.81	116.383	40.4	40.6	40.2	39.4	38.7	41.1	44	45.1	45.8	47.8	-0.833555
138	846	B	13	5	89	91	118.4	134.85	116.421	38	38.1	37.9	37.1	36.5	39	42.1	43.3	44.2	46	-1.08392
138	846	B	13	5	93	95	118.44	134.89	116.46	39.9	40.2	39.7	38.8	37.9	40.2	43.1	44.1	44.8	46.7	-0.886828
138	846	B	13	5	97	99	118.48	134.93	116.498	41.5	43.1	43.3	42.6	42.4	45.3	48.4	49.6	50.2	51.9	-0.720956
138	846	B	13	5	101	103	118.52	134.97	116.537	42.8	43.3	43.2	42.6	42.4	45.1	48.2	49.4	50.2	52.2	-0.586303
138	846	B	13	5	105	107	118.56	135.01	116.575	42.8	43.4	43.2	42.4	41.9	44.6	47.6	48.9	49.8	51.7	-0.586925
138	846	B	13	5	109	111	118.6	135.05	116.613	45.5	46.5	46.3	45.4	44.6	46.7	49.4	50.5	51.1	52.9	-0.30659
138	846	B	13	5	113	115	118.64	135.09	116.652	47.6	48.4	48.3	47.6	47.1	49.4	52.2	53.2	54	55.8	-0.0886888
138	846	B	13	5	117	119	118.68	135.13	116.69	42.9	43.2	43.1	42.5	42.1	44.8	47.8	48.9	50	52.3	-0.578385
138	846	B	13	5	121	123	118.72	135.17	116.728	52.3	53.5	53.1	52	51	52.5	54.9	55.5	56.1	57.7	0.399141
138	846	B	13	5	125	127	118.76	135.21	116.766	56.7	57.6	57	55.6	54.1	55.1	57.2	57.7	58.2	59.7	0.856375
138	846	B	13	5	129	131	118.8	135.25	116.804	52.9	54.7	54.6	53.6	52.8	54.5	56.9	57.7	58.1	59.8	0.460331
138	846	B	13	5	133	135	118.84	135.29	116.842	45.6	46.9	47.1	46.7	46.6	49.3	52.3	53.4	54.2	56.1	-0.299917
138	846	B	13	5	137	139	118.88	135.33	116.879	43.6	44.2	44.3	44	44	47	50	51.3	52.4	54.7	-0.508656
138	846	B	13	5	141	143	118.92	135.37	116.917	44.3	45.9	46.5	46.4	46.7	49.9	53.1	54.2	55.2	56.9	-0.436437
138	846	B	13	5	145	147	118.96	135.41	116.947	45.2	46.2	46.2	45.5	44.8	47.2	50	51	51.7	53.4	-0.343406
138	846	B	13	6	1	3	119.02	135.47	117.005	37.9	39.5	40	40.2	40.7	44.8	48.5	49.9	51.2	53.5	-1.10396
138	846	B	13	6	5	7	119.06	135.51	117.042	43.8	45.5	45.9	45.8	45.7	48.9	52.1	53.1	54	55.8	-0.490643
138	846	B	13	6	9	11	119.1	135.55	117.076	45.1	46.1	46.3	45.7	45.4	47.9	50.8	51.6	52.4	54.3	-0.35599
138	846	B	13	6	13	15	119.14	135.59	117.11	45.8	47	47.2	46.8	46.4	49	51.9	52.7	53.3	55.1	-0.283771
138	846	B	13	6	17	19	119.18	135.63	117.142	41.5	42.6	42.9	42.7	42.6	45.8	48.8	50	50.8	52.7	-0.731844
138	846	B	13	6	21	23	119.22	135.67	117.174	42.7	44	44.3	44	44	46.9	50	51.1	51.9	53.7	-0.607595
138	846	B	13	6	25	27	119.26	135.71	117.205	41.6	43.2	44	43.9	44.2	47.9	51.3	52.5	53.4	55.4	-0.722682
138	846	B	13	6	29	31	119.3	135.75	117.237	43.5	45.1	45.5	45.3	45.4	48.4	51.6	52.7	53.5	55.2	-0.525593
138	846	B	13	6	33	35	119.34	135.79	117.268	42.7	44.3	44.8	44.6	44.8	48	51.2	52.4	53.1	55.3	-0.609462
138	846	B	13	6	37	39	119.38	135.83	117.3	41.5	42.7	43	42.9	43	46.3	49.5	50.9	51.8	54.2	-0.734954
138	846	B	13	6	41	43	119.42	135.87	117.331	40	40.9	41.2	41.2	41.3	44.4	47.6	48.9	49.7	51.9	-0.891664
138	846	B	13	6	45	47	119.46	135.91	117.363	40.1	42.2	42.7	42.7	43.2	46.9	50.4	51.7	52.6	54.3	-0.88188
138	846	B	13	6	49	51	119.5	135.95	117.394	42.5	44.3	44.8	44.7	44.9	48.2	51.4	52.5	53.4	55.3	-0.632762
138	846	B	13	6	53	55	119.54	135.99	117.425	42.9	44	44.3	44	44.1	47.1	50.1	51.4	52.2	54.2	-0.591761
138	846	B	13	6	57	59	119.58	136.03	117.457	42.8	43.9	44.1	44	43.8	47	50.2	51.4	52.1	54.4	-0.602789
138	846	B	13	6	61	63	119.62	136.07	117.488	40.5	42.2	42.7	42.7	43	46.7	50	51.4	52.2	54.2	-0.842746
138	846	B	13	6	65	67	119.66	136.11	117.513	43.5	44.5	44.7	44.3	44	46.8	49.8	50.8	51.6	53.5	-0.531193
138	846	B	13	6	69	71	119.7	136.15	117.546	41.4	42.8	43	42.5	42.2	45	48	49.1	49.7	51.5	-0.750337
138	846	B	13	6	73	75	119.74	136.19	117.582	41.4	42.8	42.9	42.5	42.3	45.2	48.2	49.3	50.2	52.3	-0.750959
138	846	B	13	6	77	79	119.78	136.23	117.617	44.2	45.2	45.4	44.9	44.7	47.5	50.6	51.6	52.5	54.1	-0.460218
138	846	B	13	6	81	83	119.82	136.27	117.651	44.4	45.8	46	45.6	45.2	48.1	51.1	52.1	53	54.6	-0.440028
138	846	B	13	6	85	87	119.86	136.31	117.678	47.2	49	49.4	49	48.9	51.7	54.6	55.5	56.2	57.8	-0.149287
138	846	B	13	6	89	91	119.9	136.35	117.704	47.1	49	49.5	49.4	49.5	52.9	56.1	57.1	58	59.9	-0.160315
138	846	B	13	6	93	95	119.94	136.39	117.763	47.3	48.7	49.2	49	49.2	52.5	55.6	56.8	57.9	59.6	-0.140125
138	846	B	13	6	97	99	119.98	136.43	117.801	45.4	47	47.5	47.4	47.6	51.3	54.5	55.7	56.7	58.7	-0.338459
138	846	B	13	6	101	103	120.02	136.47	117.839	52.3	53.7	54	53.7	53.7	56.7	59.4	60.4	61.5	62.9	0.378922
138	846	B	13	6	105	107	120.06	136.51	117.877	51.1	52.6	52.9	52.7	52.8	55.8	58.7	59.8	60.8	62.6	0.25343
138	846	B	13	6	109	111	120.1	136.55	117.915	52.2	53.7	54.2	54.1	54.2	57.3	60.1	61.2	62.2	63.9	0.367272
138	846	B	13	6	113	115	120.14	136.59	117.952	51.3	52.8	53.2	53.2	53.5	56.7	59.7	60.9	61.8	63.5	0.272996
138	846	B	13	6	117	119	120.18	136.63	117.991	50.3	51.1	51.2	51	51.1	53.9	56.7	57.9	58.9	61	0.168316
138	846	B	13	6	121	123	120.22	136.67	118.029	50.5	52.2	52.7	52.6	52.8	55.9	58.8	60.1	60.9	62.5	0.188506
138	846	B	13	6	125	127	120.26	136.71	118.067	50.9	52.5	52.9	52.5	52.4	55.3	58	59.1	60	61.7	0.229507
138	846	B	13	6	129	131	120.3	136.75	118.105	55.9	56.7	57	56.4	56	58.5	60.9	61.9	62.8	64.5	0.749177
138	846	B	13	6	133	135	120.34	136.79	118.143	52.7	54	54.2	53.8	53.5	56.1	58.9	60	60.7	62.8	0.415568
138	846	B	13	6	137	139	120.38	136.83	118.181	53.5	54.5	54.6	53.9	53.3	55.7	58.3	59.3	60.1	61.8	0.498193
138	846	B	13	6	141	143	120.42	136.87	118.219	57.2	58	57.9	57.2	56.5	58.5	60.9	61.6	62.3	64.1	0.882586
138	846	B	13	6	145	147	120.46	136.91	118.257	52.2	53.7	54	53.5	53.2	55.9	58.6	59.6	60.1	62.3	0.361673
138	846	B	13	7	1	3	120.52	136.97	118.313	49.4	50.6	50.7	50.1	49.6	52.1	54.8	55.8	56.6	58.3	0.0693755
138	846	B	13	7	5	7	120.56	137.01	118.351	51.2	52.2	52.1	51.3	50.6	52.9	55.6	56.4	57	58.8	0.256059
138	846	B	13	7	9	11	120.6	137.05	118.389	53.7	54.6	54.3	53.3	52.3	54.3	56.8	57.6	58.2	60	0.515583
138	846	B	13	7	13	15	120.64	137.09	118.427	53.7	54.8	54.6	53.5	52.5	54.3	56.8	57.4	57.8	59.5	0.514961
138	846	B	13	7	17	19	120.68	137.13	118.462	50	50.7	50.7	50	49.5	51.8	54.4	55.5	56.3	58.5	0.129322
138	846	B	13	7	21	23	120.72	137.17	118.498	50.1	50.7	50.6	49.9	49.2	51.5	54.3	55.1	56	57.6	0.139106
138	846	B	13	7	25	27	120.76	137.21	118.533	51.6	52.4	52.1	51.2	50.3	52.3	54.9	55.8	56.4	58.2	0.294572
138	846	B	13	7	29	31	120.8	137.25	118.567	52.4	53.6	53.3	52.1	51	53	55.4	56.1	56.6	58.2	0.377196
138	846	B	13	7	33	35	120.84	137.29	118.602	56.3	57.2	56.9	55.7	54.6	56.3	58.6	59.3	59.7	61.2	0.782401
138	846	B	13	7	37	39	120.88	137.33	118.636	52	53.4	53.7	53	52.4	55.2	58	58.9	59.5	61.4	0.334328
138	846	B	13	7	41	43	120.92	137.37	118.671	58.8	59.5	59.2	58.3	57.6	59.7	62	62.8	63.3	65	1.0413
138	846	B	13	7	45	47	120.96	137.41	118.707	63	63.5	62.8	61.8	60.9	62.5	64.6	65.3	65.8	67.4	1.47773
138	846	B	13	7	49	51	121	137.45	118.743	60.1	60.7	60.2	59.2	58.2	59.8	61.9	62.8	63.2	65.1	1.17533
138	846	B	13	7	53	55	121.04	137.49	118.779	57.2	57.5	57.3	56.3	55.6	57.7	60.1	61	61.6	63.3	0.872943
138	846	B	13	7	57	59	121.08	137.53	118.817	59.1	59.8	59.4	58.3	57.4	59.1	61.4	62.1	62.5	64.2	1.07003
138	846	B	13	7	61	63	121.12	137.57	118.855	54.1	54.9	54.5	53.5	52.8	54.8	57.3	58.1	58.9	60.7	0.549118
138	846	B	13	7	65	67	121.16	137.61	118.882	58.4	59.1	58.9	57.9	57.1	58.7	61	61.8	62.3	63.9	0.995946
138	846	B	13	7	69	71	121.2	137.65	118.906	57.7	58.7	58.3	57.3	56.5	58.2	60.6	61.3	61.9	63.5	0.922484
138	846	D	13	6	41	43	123.72	138.32	118.918	53.8	55.7	56	55.6	55.1	56.7	59	59.7	60	60.9	1.14527
138	846	B	13	7	73	75	121.24	137.69	118.931	58.8	60.3	59.7	58.2	56.7	58	60.3	60.7	60.9	62.4	1.03633
138	846	D	13	6	45	47	123.76	138.36	118.947	56.8	58.8	58.9	58.3	57.6	58.9	61	61.6	61.8	62.8	1.48703
138	846	B	13	7	77	79	121.28	137.73	118.973	54.2	54.6	54.4	53.3	52.5	54.3	56.7	57.5	58	60	0.557035
138	846	D	13	6	49	51	123.8	138.4	118.989	51.9	54	54.3	53.8	53.4	55.1	57.4	58.1	58.3	59.2	0.925537
138	846	D	13	6	53	55	123.84	138.44	119.042	50.4	52.6	53.1	52.7	52.3	54.3	56.7	57.5	57.7	59	0.752785
138	846	D	13	6	57	59	123.88	138.48	119.094	48.7	51.1	51.6	50.9	50.4	52.2	54.7	55.3	55.4	56.2	0.557165
138	846	D	13	6	61	63	123.92	138.52	119.145	42.8	44.9	45.5	45.2	45.1	47.7	50.6	51.5	52	53	-0.11867
138	846	B	14	1	7	9	121.08	138.23	119.145	54.2	55.3	54.6	53	51.6	53.1	55.4	56	56.3	57.6	0.549259
138	846	B	14	1	11	13	121.12	138.27	119.185	47.4	48.3	48	46.9	46	48.3	51	51.8	52.5	54	-0.15896
138	846	D	13	6	65	67	123.96	138.56	119.186	44.2	45.8	46	45.3	44.7	46.7	49.2	49.9	50.2	51.4	0.0401559
138	846	B	14	1	15	17	121.16	138.31	119.225	49.3	49.6	49.2	47.7	46.5	48.4	51	51.7	52	53.9	0.038129
138	846	B	14	1	19	21	121.2	138.35	119.265	47.1	47.5	47	45.9	45	47.2	49.9	50.7	51.1	53.4	-0.191421
138	846	B	14	1	23	25	121.24	138.39	119.305	46.8	46.6	46	44.7	43.7	45.6	48.2	49.1	49.6	51.2	-0.223261
138	846	B	14	1	27	29	121.28	138.43	119.344	45.5	46	45.1	44.1	43.1	45.1	47.9	48.6	49.3	51.1	-0.359159
138	846	B	14	1	31	33	121.32	138.47	119.382	44.3	45.6	45.2	44.4	43.6	46.3	49.2	50	50.7	52.4	-0.484651
138	846	B	14	1	35	37	121.36	138.51	119.421	50.2	50.4	49.8	48.8	47.8	49.6	52.2	53	53.4	55.4	0.128671
138	846	B	14	1	39	41	121.4	138.55	119.459	56.2	56.5	55.7	54.2	52.8	54	56.2	56.9	57.6	58.6	0.752398
138	846	B	14	1	43	45	121.44	138.59	119.498	60.9	61	60	58.9	57.8	59.2	61.3	62.2	62.9	64.5	1.24085
138	846	B	14	1	47	49	121.48	138.63	119.536	60.6	60.5	59.9	58.9	58.2	59.7	62	62.8	63.9	65.2	1.20901
138	846	B	14	1	51	53	121.52	138.67	119.572	66.2	66	64.8	63.3	61.6	62.5	64.2	64.9	65.5	66.6	1.79112
138	846	B	14	1	55	57	121.56	138.71	119.606	65	65.1	64.5	63.4	62.4	63.8	66	66.4	67.2	68.7	1.66562
138	846	B	14	1	59	61	121.6	138.75	119.639	62.9	63	61.9	60.3	58.7	59.7	61.6	62.3	62.6	64.3	1.44648
138	846	B	14	1	63	65	121.64	138.79	119.673	52.5	52.4	51.8	50.9	50.1	52	54.5	55.3	56.1	57.7	0.363651
138	846	B	14	1	67	69	121.68	138.83	119.707	62	62.7	61.8	60.6	59.4	60.6	62.6	63.4	64	65.4	1.35158
138	846	B	14	1	71	73	121.72	138.87	119.741	62.2	61.8	60.9	59.9	59.1	60.6	62.9	63.8	64.5	66	1.37177
138	846	B	14	1	75	77	121.76	138.91	119.774	62.1	62	61.3	60.1	59.2	61.1	63.3	64.2	64.7	66.4	1.36074
138	846	B	14	1	79	81	121.8	138.95	119.808	67.1	67.3	66.3	64.8	63.2	64.1	65.9	66.6	67	68.3	1.88041
138	846	B	14	1	83	85	121.84	138.99	119.842	64.4	64	62.8	61.2	59.7	60.5	62.4	63.2	63.5	64.9	1.59883
138	846	B	14	1	87	89	121.88	139.03	119.876	61.9	61.7	60.5	58.9	57.4	58.4	60.5	61.3	61.9	63.4	1.33807
138	846	B	14	1	91	93	121.92	139.07	119.909	60.9	61.4	60.5	59.1	57.9	59.2	61.3	62.2	62.7	64.4	1.23339
138	846	B	14	1	95	97	121.96	139.11	119.943	66.6	66.9	65.4	63	60.7	61	62.8	63.2	63.4	64.7	1.8259
138	846	B	14	1	99	101	122	139.15	119.977	59.2	59.1	58	56.3	54.9	56	58.2	59	59.9	61.1	1.05524
138	846	B	14	1	103	105	122.04	139.19	120.011	58	58.3	57.1	55.5	54	55.1	57.2	58.1	58.5	59.5	0.92975
138	846	B	14	1	107	109	122.08	139.23	120.045	55.8	54.5	53.1	51.7	50.6	52	54.4	55.1	56.3	57.7	0.7002
138	846	B	14	1	111	113	122.12	139.27	120.079	66.5	65.9	64.5	62.4	60.4	60.8	62.6	63.4	63.5	64.8	1.813
138	846	B	14	1	115	117	122.16	139.31	120.113	61	60.6	59.4	57.6	56.1	56.8	58.7	59.6	59.8	61.1	1.24006
138	846	B	14	1	119	121	122.2	139.35	120.147	65.2	64.1	62.7	61.3	60.1	60.8	62.7	63.5	64	65.5	1.67648
138	846	B	14	1	123	125	122.24	139.39	120.18	64	63.6	62.8	61.7	60.7	61.9	63.9	64.7	65.3	67.1	1.55099
138	846	B	14	1	127	129	122.28	139.43	120.214	66.1	66.6	65.7	64.2	62.7	63.5	65.2	65.9	66.2	67.9	1.76889
138	846	B	14	1	131	133	122.32	139.47	120.248	65.9	65.9	64.9	63.3	61.9	62.7	64.5	65.3	65.7	67	1.74746
138	846	B	14	1	135	137	122.36	139.51	120.282	60.8	60.8	60.1	59	58	59.5	61.7	62.5	63.3	64.8	1.21614
138	846	B	14	1	139	141	122.4	139.55	120.316	69.1	69.3	68.4	66.9	65.6	66.5	68.4	69	69.4	70.9	2.0792
138	846	B	14	1	143	145	122.44	139.59	120.34	63.1	63.6	62.6	60.8	59.1	59.9	61.9	62.5	62.7	63.8	1.45423
138	846	B	14	1	147	149	122.48	139.63	120.357	36.2	35.7	34.7	33.9	33.3	35.7	38.8	39.9	40.8	43.2	-1.34556
138	846	B	14	2	1	3	122.52	139.67	120.374	56.3	57	56.4	55	53.8	55.3	57.6	58.2	58.6	60.2	0.745385
138	846	B	14	2	5	7	122.56	139.71	120.406	51.9	51.9	51.2	50.1	49.2	51	53.5	54.4	55.2	56.7	0.286906
138	846	B	14	2	9	11	122.6	139.75	120.444	52.6	52.4	51.5	50.3	49.3	51	53.5	54.3	54.9	56.4	0.359125
138	846	B	14	2	13	15	122.64	139.79	120.482	45.4	44.8	44	43	42.1	44.2	46.9	48	48.8	50.9	-0.390717
138	846	B	14	2	17	19	122.68	139.83	120.52	46	46	45.5	44.3	43.4	45.4	48.2	49.1	49.5	51.2	-0.328904
138	846	B	14	2	21	23	122.72	139.87	120.558	46.8	46.8	45.8	44.5	43.3	45.1	47.8	48.6	49.2	50.9	-0.246279
138	846	B	14	2	25	27	122.76	139.91	120.596	47.1	47.7	47.4	46.3	45.4	47.5	50.3	51.1	51.3	53.1	-0.215684
138	846	B	14	2	29	31	122.8	139.95	120.634	46.2	45.8	44.9	43.6	42.7	44.5	47.2	48.3	48.9	50.4	-0.309958
138	846	B	14	2	33	35	122.84	139.99	120.672	52.1	52.4	51.6	50.1	48.6	50.1	52.5	53.2	53.7	55.1	0.303364
138	846	B	14	2	37	39	122.88	140.03	120.71	52.1	52.1	51.4	50.2	49.3	51.1	53.6	54.6	55.4	57.2	0.302741
138	846	B	14	2	41	43	122.92	140.07	120.748	61.2	61.6	60.9	59.4	58	59.1	61.2	61.9	62.4	64	1.24905
138	846	B	14	2	45	47	122.96	140.11	120.785	66.6	66.9	65.8	64.1	62.4	63.1	64.9	65.6	65.7	66.9	1.81034
138	846	B	14	2	49	51	123	140.15	120.823	66	66	65	63.3	61.9	62.8	64.8	65.5	65.8	67.4	1.74728
138	846	B	14	2	53	55	123.04	140.19	120.89	61.7	61.7	60.7	59.2	57.7	58.9	60.9	61.8	62.2	63.5	1.29921
138	846	B	14	2	57	59	123.08	140.23	120.939	65.8	65.8	64.6	62.5	60.5	61.1	62.9	63.4	63.7	65.2	1.72523
138	846	B	14	2	61	63	123.12	140.27	120.968	69.6	69.7	68.5	66.4	64.2	64.5	66.2	66.6	66.8	68.2	2.12003
138	846	B	14	2	65	67	123.16	140.31	120.988	74.5	73.8	72.3	70.4	68.6	69	70.5	71	71.4	72.8	2.62929
138	846	B	14	2	69	71	123.2	140.35	121.008	59.9	59	57.9	56.7	55.6	57.2	59.5	60.5	61.6	63.7	1.10942
138	846	B	14	2	73	75	123.24	140.39	121.031	62.6	62.1	61.2	60	58.9	60.4	62.5	63.5	64.5	66.5	1.38975
138	846	B	14	2	77	79	123.28	140.43	121.063	72.7	72.7	71.1	68.7	66.3	66.4	67.9	68.3	68.5	69.8	2.44012
138	846	B	14	2	81	83	123.32	140.47	121.096	64.4	64.5	63.4	61.7	60.1	61.2	63.2	64	64.5	66.1	1.57582
138	846	B	14	2	85	87	123.36	140.51	121.127	72	71.9	70.5	68.2	65.8	66.1	67.5	68	68.3	70.1	2.36604
138	846	B	14	2	89	91	123.4	140.55	121.159	72.9	72.4	71	69	66.9	67.4	69	69.6	69.9	71.4	2.45907
138	846	B	14	2	93	95	123.44	140.59	121.19	72.5	71.9	70.4	68.5	66.7	67.4	69	69.6	70	71.5	2.41682
138	846	B	14	2	97	99	123.48	140.63	121.221	73.8	73.7	72.1	69.9	67.6	67.7	69.1	69.5	69.7	70.9	2.55147
138	846	B	14	2	101	103	123.52	140.67	121.253	72.2	71.7	70.3	68.5	66.7	67.2	68.8	69.4	69.5	70.8	2.38436
138	846	B	14	2	105	107	123.56	140.71	121.284	61.3	60.8	59.5	57.8	56.3	57.5	59.5	60.3	60.8	62.2	1.2495
138	846	B	14	2	109	111	123.6	140.75	121.316	64.4	64	62.7	60.9	59.1	60.2	62.1	62.7	63	64.4	1.57146
138	846	B	14	2	113	115	123.64	140.79	121.347	60.9	60.3	59	57.3	55.8	57	59	59.8	60.4	61.8	1.20663
138	846	B	14	2	117	119	123.68	140.83	121.378	62.8	63	62.1	60.7	59.7	61	63.4	63.9	64.3	66.1	1.40372
138	846	B	14	2	121	123	123.72	140.87	121.41	70.4	70.4	69.2	67.4	65.5	66.2	67.7	68.5	68.4	70	2.19394
138	846	B	14	2	125	127	123.76	140.91	121.441	66.6	66.2	65.2	63.8	62.6	63.9	65.9	66.8	67.4	69.1	1.7979
138	846	B	14	2	129	131	123.8	140.95	121.473	60.7	60.6	60.2	59.4	58.9	61.2	63.7	64.8	65.6	67.2	1.18333
138	846	B	14	2	133	135	123.84	140.99	121.504	72.4	71.9	70.7	69.2	67.8	68.7	70.3	70.9	71.7	72.7	2.40019
138	846	B	14	2	137	139	123.88	141.03	121.535	75.8	76.2	75.1	73.2	71.5	72.2	73.7	74.5	75	75.7	2.75337
138	846	B	14	2	141	143	123.92	141.07	121.567	76.4	76.1	74.5	72.5	70.5	70.8	72.1	72.6	73.1	74.2	2.81518
138	846	B	14	2	145	147	123.96	141.11	121.598	66.2	65.6	64.4	62.7	61.2	62.2	64.1	64.8	65.2	66.6	1.75317
138	846	B	14	3	2	4	124.03	141.18	121.653	70	69.4	68.4	66.9	65.6	66.7	68.4	69.2	69.7	71.2	2.1475
138	846	B	14	3	6	8	124.07	141.22	121.685	77.8	76.9	75.7	74.2	72.7	73.6	75	75.7	76.3	78	2.95853
138	846	B	14	3	10	12	124.11	141.26	121.716	77.5	76.1	74.6	72.9	71.4	72	73.6	74.2	74.8	76.9	2.92669
138	846	B	14	3	14	16	124.15	141.3	121.748	75.1	74.2	72.6	70.7	68.9	69.4	70.9	71.6	72.2	73.9	2.67633
138	846	B	14	3	18	20	124.19	141.34	121.779	65	64.9	64	62.4	61	62.1	64	64.7	65.3	67	1.62472
138	846	B	14	3	22	24	124.23	141.38	121.811	65.6	65.8	65.3	64.2	63.4	65.2	67.5	68.4	69	70.7	1.68653
138	846	B	14	3	26	28	124.27	141.42	121.846	70.5	70.4	69.2	67.5	66	66.9	68.8	69.3	69.6	71.1	2.1958
138	846	B	14	3	30	32	124.31	141.46	121.88	65.7	65.6	64.6	63.3	62	63.4	65.4	65.9	66.7	67.6	1.69569
138	846	B	14	3	34	36	124.35	141.5	121.914	63.1	63.3	62.8	61.6	60.9	62.8	65.2	66	66.7	67.9	1.42452
138	846	B	14	3	38	40	124.39	141.54	121.948	76.2	76.2	75.1	73.5	71.9	72.6	74.1	74.6	74.9	76.2	2.78706
138	846	B	14	3	42	44	124.43	141.58	121.982	72.8	72.1	70.9	69.6	68.3	69.3	70.9	71.6	72.4	74.3	2.43264
138	846	B	14	3	46	48	124.47	141.62	122.017	79.1	79.4	78.5	76.8	75	75.5	76.8	77.2	77.3	78.7	3.08759
138	846	B	14	3	50	52	124.51	141.66	122.052	71.9	71.3	70.3	68.9	67.7	68.8	70.8	71.5	72.3	74	2.33774
138	846	B	14	3	54	56	124.55	141.7	122.087	68.3	67.9	66.8	65.3	64	65.1	67	67.7	68.3	69.7	1.96251
138	846	B	14	3	58	60	124.59	141.74	122.121	61.5	61.5	61	60.1	59.3	61.4	63.8	64.8	65.8	67.7	1.25429
138	846	B	14	3	62	64	124.63	141.78	122.156	68.4	68	66.8	65.1	63.6	64.5	66.2	66.9	67.5	68.9	1.97167
138	846	B	14	3	66	68	124.67	141.82	122.19	63.6	63.5	62.5	60.8	58.9	59.6	61.5	62.2	62.5	63.7	1.47157
138	846	B	14	3	70	72	124.71	141.86	122.224	66.9	66.9	65.8	64	62.1	62.7	64.5	65.1	65.5	66.8	1.81434
138	846	B	14	3	74	76	124.75	141.9	122.259	63.5	62.8	61.4	59.6	58.1	59	61	61.6	62.2	63.6	1.45992
138	846	B	14	3	78	80	124.79	141.94	122.294	71.5	71	69.6	67.7	65.9	66.5	68.1	68.7	69	70.5	2.29177
138	846	B	14	3	82	84	124.83	141.98	122.328	63.9	63.1	61.7	60.1	58.6	59.7	61.7	62.5	63.2	65	1.5003
138	846	B	14	3	86	88	124.87	142.02	122.366	63.3	63	61.9	60.2	58.5	59.6	61.6	62.3	62.9	64.4	1.43724
138	846	B	14	3	90	92	124.91	142.06	122.403	61.4	61.6	60.5	58.5	56.8	57.8	59.8	60.4	60.8	62.1	1.23891
138	846	B	14	3	94	96	124.95	142.1	122.441	59	59.5	58.4	56.5	54.7	55.7	57.8	58.3	58.6	59.9	0.988549
138	846	B	14	3	98	100	124.99	142.14	122.479	52.8	52.7	51.7	49.9	48.3	49.6	52	52.7	53.1	54.7	0.342766
138	846	B	14	3	102	104	125.03	142.18	122.517	52.7	52.4	51.5	50.3	49.1	50.6	53.1	54	54.5	55.9	0.331737
138	846	B	14	3	106	108	125.07	142.22	122.555	66.7	66.6	65.8	64.6	63.6	65	67.1	67.9	68.5	70.3	1.78793
138	846	B	14	3	110	112	125.11	142.26	122.592	71.1	71.9	71.3	70	68.9	70.2	72.1	72.7	73	74.6	2.24517
138	846	B	14	3	114	116	125.15	142.3	122.631	76.7	77.2	76.4	74.9	73.6	74.7	76.2	76.7	77	78.3	2.82727
138	846	B	14	3	118	120	125.19	142.34	122.669	65.1	65.6	64.9	63.7	62.7	64.3	66.4	67	67.5	69.2	1.61957
138	846	B	14	3	122	124	125.23	142.38	122.707	61.1	61.4	60.8	59.7	58.7	60.5	62.7	63.5	64.2	66	1.20272
138	846	B	14	3	126	128	125.27	142.42	122.745	71.2	71.3	70.5	69.1	67.8	68.9	70.7	71.4	71.8	73.5	2.25308
138	846	B	14	3	130	132	125.31	142.46	122.784	73.1	74	73.2	71.5	70	70.8	72.3	72.8	73.1	74.5	2.45017
138	846	B	14	3	134	136	125.35	142.5	122.822	66.6	66	64.7	63.3	62	63.1	65	65.8	66.4	68	1.77317
138	846	B	14	3	138	140	125.39	142.54	122.86	66.5	66.4	65.4	63.9	62.4	63.5	65.4	66.1	66.6	68	1.76214
138	846	B	14	3	142	144	125.43	142.58	122.899	68.6	68.5	67.3	65.6	63.8	64.7	66.4	67.1	67.4	68.8	1.98004
138	846	B	14	3	146	148	125.47	142.62	122.937	63.7	63.7	62.6	61.1	59.7	60.7	62.7	63.4	64	65.3	1.46954
138	846	B	14	4	1	3	125.52	142.67	122.986	56.1	56.4	55.7	54.3	53.1	54.7	57.1	57.9	58.4	60.1	0.677915
138	846	B	14	4	5	7	125.56	142.71	123.024	63.4	62.8	61.6	59.8	58.2	59	61.1	61.7	62.2	63.7	1.43692
138	846	B	14	4	9	11	125.6	142.75	123.063	63.5	63.5	62.1	60.2	58.2	58.8	60.7	61.2	61.5	62.6	1.4467
138	846	B	14	4	13	15	125.64	142.79	123.102	62.2	62.8	62.2	61	59.9	61.2	63.3	64	64.4	65.7	1.3108
138	846	B	14	4	17	19	125.68	142.83	123.144	64.8	64.5	63.4	62	60.4	61.3	63.1	63.9	64.4	65.9	1.58073
138	846	B	14	4	21	23	125.72	142.87	123.187	66.7	66.2	65.2	63.8	62.3	63.2	65	65.8	66.3	67.5	1.77782
138	846	B	14	4	25	27	125.76	142.91	123.223	66.2	66.5	65.8	64.3	62.9	63.8	65.6	66.2	66.5	68.2	1.72517
138	846	B	14	4	29	31	125.8	142.95	123.259	61.2	61	60.1	58.8	57.4	58.5	60.6	61.4	62	63.7	1.20426
138	846	B	14	4	33	35	125.84	142.99	123.296	59.4	60.6	59.6	57.7	55.8	56.6	58.6	59	59.3	60.3	1.01633
138	846	B	14	4	37	39	125.88	143.03	123.335	61.4	61.6	60.5	58.6	56.7	57.5	59.5	60.1	60.3	61.7	1.22382
138	846	B	14	4	41	43	125.92	143.07	123.374	58	58.1	57	55.5	53.9	55	57.1	57.9	58.1	59.5	0.869404
138	846	B	14	4	45	47	125.96	143.11	123.413	56.1	56.6	56.2	55	54	55.7	58.1	59	59.6	61.4	0.671071
138	846	B	14	4	49	51	126	143.15	123.452	56.8	56.7	55.4	53.4	51.4	52.2	54.2	54.6	55.1	56.6	0.74329
138	846	B	14	4	53	55	126.04	143.19	123.49	53	53	52.1	50.6	49.1	50.6	52.8	53.5	54	55.4	0.347247
138	846	B	14	4	57	59	126.08	143.23	123.529	53.9	54.6	53.9	52.5	51.2	52.9	55.2	55.8	56.2	57.8	0.440276
138	846	B	14	4	61	63	126.12	143.27	123.568	53.7	54.5	53.9	52.6	51.3	52.9	55.3	55.8	56.2	57.6	0.418843
138	846	B	14	4	65	67	126.16	143.31	123.607	51.5	51.9	51.4	50.1	49.1	50.9	53.5	54.2	54.7	56.2	0.189292
138	846	B	14	4	69	71	126.2	143.35	123.646	48.1	49.1	48.7	47.8	47	49.2	51.9	52.7	53.2	54.8	-0.165128
138	846	B	14	4	73	75	126.24	143.39	123.684	50.8	51.9	51.5	50.2	49.1	50.9	53.5	54	54.4	55.9	0.115208
138	846	B	14	4	77	79	126.28	143.43	123.723	50.5	50.9	50.5	49.3	48.4	50.4	53	53.8	54.3	56	0.0833676
138	846	B	14	4	81	83	126.32	143.47	123.762	54.4	55.4	54.9	53.3	51.8	53.3	55.6	56.1	56.4	57.7	0.488573
138	846	B	14	4	85	87	126.36	143.51	123.801	54.1	54.4	53.7	52.3	51.1	52.7	55	55.8	56.3	57.7	0.456734
138	846	B	14	4	89	91	126.4	143.55	123.84	51.2	51.7	51.3	50.4	49.7	52.1	54.8	55.8	56.6	58	0.154342
138	846	B	14	4	93	95	126.44	143.59	123.879	54.7	54.9	54.4	53.4	52.6	54.6	57.1	57.9	58.8	59.9	0.517924
138	846	B	14	4	97	99	126.48	143.63	123.918	56.2	56.2	55.1	53.7	52.3	53.6	55.8	56.8	56.9	58.7	0.673389
138	846	B	14	4	101	103	126.52	143.67	123.957	53.3	52.6	51.4	50.1	49	50.9	53.3	54.3	55.2	57	0.370998
138	846	B	14	4	105	107	126.56	143.71	123.981	57	57.6	56.8	55.3	54	55.4	57.7	58.4	58.9	60.5	0.755392
138	846	B	14	4	109	111	126.6	143.75	124.014	62.3	62.7	61.6	59.6	57.5	58	59.8	60.4	60.6	61.7	1.30628
138	846	B	14	4	113	115	126.64	143.79	124.073	58	57.8	56.7	55.4	54	55.1	57.4	58.1	58.5	60.6	0.858206
138	846	B	14	4	117	119	126.68	143.83	124.111	62	62.3	61.3	59.4	57.4	57.9	59.9	60.3	60.9	61.9	1.27382
138	846	B	14	4	121	123	126.72	143.87	124.15	58	57.6	56.5	55	53.4	54.4	56.6	57.4	58	59.2	0.856962
138	846	B	14	4	125	127	126.76	143.91	124.181	60.4	60.5	59.4	57.6	55.8	56.7	58.6	59.4	59.8	61.1	1.10608
138	846	B	14	4	129	131	126.8	143.95	124.21	54.3	53.8	53.2	51.9	50.8	52.6	54.9	55.9	56.8	58.3	0.470702
138	846	B	14	4	133	135	126.84	143.99	124.238	65.1	65.3	64	62.1	60	60.4	62.1	62.7	63.1	64.5	1.59391
138	846	B	14	4	137	139	126.88	144.03	124.289	63.2	62.2	60.8	58.9	56.9	57.5	59.4	60.1	60.6	62	1.39558
138	846	B	14	4	141	143	126.92	144.07	124.341	60.8	60.8	59.3	56.5	53.7	53.8	55.6	56.2	56.3	57.6	1.14521
138	846	B	14	4	145	147	126.96	144.11	124.383	61.8	61.7	60	57.4	54.9	55.2	57.1	57.6	57.9	59.1	1.24865
138	846	B	14	5	1	3	127.02	144.17	124.441	52.1	51.3	49.9	47.9	46.1	47.4	49.8	50.6	51.3	52.8	0.238352
138	846	B	14	5	5	7	127.06	144.21	124.48	53.3	53.4	52	49.5	47.1	47.9	50.2	50.7	50.7	52.4	0.362599
138	846	B	14	5	9	11	127.1	144.25	124.519	45.6	45.1	43.9	42.2	40.7	42.2	44.9	45.7	46.1	47.7	-0.439271
138	846	B	14	5	13	15	127.14	144.29	124.558	55.6	55.9	54.8	52.7	50.6	51.5	53.6	54.2	54.7	55.9	0.60069
138	846	B	14	5	17	19	127.18	144.33	124.597	47.7	47.1	46.2	44.8	43.7	45.5	48.1	49.1	50	52	-0.221993
138	846	B	14	5	21	23	127.22	144.37	124.635	51.6	52	51.4	50	48.9	50.7	53.3	54.1	54.8	56.3	0.183213
138	846	B	14	5	25	27	127.26	144.41	124.675	53.7	54.5	54.1	53	52.2	54.4	57	57.9	58.5	60.1	0.401112
138	846	B	14	5	29	31	127.3	144.45	124.714	52.5	52.9	52.5	51.5	50.9	53.2	55.8	56.9	57.8	59.7	0.27562
138	846	B	14	5	33	35	127.34	144.49	124.753	51.2	52.3	52.1	51.4	51	53.6	56.4	57.3	58	59.8	0.139722
138	846	B	14	5	37	39	127.38	144.53	124.792	48	49.5	49.6	49.1	49	52.2	55.4	56.5	57.2	58.7	-0.193886
138	846	B	14	5	41	43	127.42	144.57	124.831	48.2	49	48.6	47.5	46.5	48.7	51.3	52.1	52.7	54.4	-0.173696
138	846	B	14	5	45	47	127.46	144.61	124.871	45.6	47.1	46.8	45.6	44.6	46.6	49.3	49.9	50.2	51.9	-0.444871
138	846	B	14	5	49	51	127.5	144.65	124.912	43.4	44.7	44.5	43.5	42.7	45.4	48.3	49.2	49.8	51.4	-0.674421
138	846	B	14	5	53	55	127.54	144.69	124.952	43.7	44.5	43.9	42.4	41.1	43	45.8	46.4	46.8	48.3	-0.643825
138	846	B	14	5	57	59	127.58	144.73	124.993	42.8	43.9	43.4	42.1	41	43.2	46.1	46.7	47.1	48.8	-0.738099
138	846	B	14	5	61	63	127.62	144.77	125.033	41.3	42.5	42.6	41.9	41.3	44.4	47.4	48.4	49.1	50.7	-0.894809
138	846	B	14	5	65	67	127.66	144.81	125.073	46.5	47.3	47	45.8	44.7	46.8	49.5	50.3	50.8	52.4	-0.354329
138	846	B	14	5	69	71	127.7	144.85	125.114	45.4	46.7	46.7	45.8	45.2	48	51	52	52.7	54.4	-0.469414
138	846	B	14	5	73	75	127.74	144.89	125.154	57.1	57.9	57.3	55.9	54.5	56	58.4	58.9	59.4	60.9	0.747445
138	846	B	14	5	77	79	127.78	144.93	125.194	63	63.5	62.8	61.2	59.7	60.8	62.8	63.4	63.6	64.8	1.36077
138	846	B	14	5	81	83	127.82	144.97	125.234	63.7	64.2	63.5	62.2	60.9	62.3	64.3	65	65.6	66.9	1.43299
138	846	B	14	5	85	87	127.86	145.01	125.274	70.3	70.3	69.6	68	66.2	67	68.6	69	69.4	70.7	2.11915
138	846	B	14	5	89	91	127.9	145.05	125.314	68.8	69.2	68.6	67.4	66.2	67.7	69.5	70.2	71	72.7	1.96244
138	846	B	14	5	93	95	127.94	145.09	125.354	74.2	73.8	72.7	70.9	69.3	69.8	71.3	72	72.4	74	2.52373
138	846	B	14	5	97	99	127.98	145.13	125.394	74.3	74.2	73.1	71.3	69.5	69.8	71.4	71.9	72.5	74	2.53352
138	846	B	14	5	101	103	128.02	145.17	125.433	66.6	66.4	65.5	64.2	62.9	64.1	66	66.7	67.2	68.6	1.73164
138	846	B	14	5	105	107	128.06	145.21	125.473	68.2	68.2	67.3	65.7	64.2	65	66.8	67.5	67.9	69.2	1.89751
138	846	B	14	5	109	111	128.1	145.25	125.513	70.3	70.6	69.5	67.3	65.1	65.5	67	67.3	67.5	69	2.11542
138	846	B	14	5	113	115	128.14	145.29	125.552	59.5	59.9	59.2	57.9	56.7	58.3	60.5	61.3	61.9	63.5	0.990964
138	846	B	14	5	117	119	128.18	145.33	125.592	62.4	62.5	61.6	60.1	58.6	59.7	61.6	62.3	62.7	64.3	1.29211
138	846	B	14	5	121	123	128.22	145.37	125.631	62.7	63.5	62.9	61.8	60.6	62	64.2	64.6	64.9	67.2	1.32271
138	846	B	14	5	125	127	128.26	145.41	125.671	57.3	58.1	57.9	57.1	56.1	57.9	60.4	60.9	61.5	62.9	0.76017
138	846	B	14	5	129	131	128.3	145.45	125.71	48.8	50	50.5	50.2	50	52.9	55.8	57	57.3	59.5	-0.124948
138	846	B	14	5	133	135	128.34	145.49	125.749	43.7	45.5	45.9	45.7	45.8	48.8	51.7	53.1	53.8	54.8	-0.656268
138	846	B	14	5	137	139	128.38	145.53	125.789	42.9	44.6	45.1	44.7	44.7	47.9	50.9	51.7	52.2	54	-0.740136
138	846	B	14	5	141	143	128.42	145.57	125.828	39.7	41.3	41.7	41.2	41.1	44	47.1	47.9	48.4	50.4	-1.07374
138	846	B	14	5	145	147	128.46	145.61	125.863	38.3	39.5	39.7	39.4	39.4	42.5	45.8	46.8	47.8	49.8	-1.22005
138	846	B	14	6	1	3	128.52	145.67	125.925	39.1	40.5	40.8	40.4	40.3	43.5	46.7	47.6	48.4	50.1	-1.13774
138	846	B	14	6	5	7	128.56	145.71	125.965	40.6	42	42.1	41.5	41.1	43.9	46.9	47.7	48.1	49.6	-0.98227
138	846	B	14	6	9	11	128.6	145.75	126.003	37.9	39.1	39	38.1	37.4	40	43	43.8	44.3	45.9	-1.26385
138	846	B	14	6	13	15	128.64	145.79	126.043	41	41.7	41.3	40.3	39.4	41.6	44.4	45.1	45.9	47.5	-0.941891
138	846	B	14	6	17	19	128.68	145.83	126.084	42.5	43.2	42.6	41.4	40.4	42.4	45.2	45.9	46.6	48.2	-0.786426
138	846	B	14	6	21	23	128.72	145.87	126.125	46.6	47.5	47	45.5	44.2	45.9	48.5	49	49.5	50.9	-0.360408
138	846	B	14	6	25	27	128.76	145.91	126.167	49.2	49.2	48.4	47	45.6	47.1	49.7	50.5	50.9	52.4	-0.0904796
138	846	B	14	6	29	31	128.8	145.95	126.209	52.5	52.4	51.5	50.2	48.8	50.5	52.7	53.7	54.1	55.8	0.252291
138	846	B	14	6	33	35	128.84	145.99	126.252	60.6	61.2	60.4	58.8	57.2	58.3	60.3	60.9	61.2	62.8	1.09454
138	846	B	14	6	37	39	128.88	146.03	126.289	60.5	60.4	59.6	58.1	56.7	57.9	60	60.7	61.1	62.6	1.08351
138	846	B	14	6	41	43	128.92	146.07	126.322	61.5	61.2	60.4	59.1	57.7	58.9	60.9	61.6	62	63.3	1.18695
138	846	B	14	6	45	47	128.96	146.11	126.365	65.3	65.4	64.4	62.5	60.4	61	62.6	63.2	63.5	64.2	1.58175
138	846	B	14	6	49	51	129	146.15	126.412	61.7	62.2	61.5	60.1	58.6	60	62.1	62.8	63.2	64.6	1.20652
138	846	B	14	6	53	55	129.04	146.19	126.458	66.6	66.2	65	63.4	61.5	61.9	63.6	64.2	64.5	65.6	1.71578
138	846	B	14	6	57	59	129.08	146.23	126.504	63	62.3	60.8	58.6	56.5	56.9	58.7	59.3	59.6	60.8	1.34055
138	846	B	14	6	61	63	129.12	146.27	126.545	55.5	54.7	53.3	51.6	50.1	51.2	53.4	54.2	54.6	56.2	0.559488
138	846	B	14	6	65	67	129.16	146.31	126.586	58.4	58.1	56.8	55.1	53.3	54.2	56.3	56.9	57.5	58.8	0.860636
138	846	B	14	6	69	71	129.2	146.35	126.627	61	61.3	60.3	58.6	56.9	57.8	59.9	60.6	61	62.2	1.13057
138	846	B	14	6	73	75	129.24	146.39	126.667	64.2	63.9	62.3	59.9	57.4	57.6	59.4	60.1	60.4	61.4	1.46293
138	846	B	14	6	77	79	129.28	146.43	126.707	66.3	66.2	64.7	62.3	59.7	59.9	61.5	62.1	62.3	63.7	1.68083
138	846	B	14	6	81	83	129.32	146.47	126.746	67.9	67.5	65.9	63.6	61.2	61.3	62.9	63.5	63.9	64.8	1.8467
138	846	B	14	6	85	87	129.36	146.51	126.786	66.5	66.9	65.5	63.2	60.7	60.8	62.4	62.8	62.9	63.9	1.7004
138	846	B	14	6	89	91	129.4	146.55	126.826	63.1	62.3	61.3	59.5	58	58.8	60.8	61.5	62.1	63.5	1.34598
138	846	B	14	6	93	95	129.44	146.59	126.865	61.9	61.3	60.2	58.6	56.9	57.8	59.7	60.5	60.8	62.9	1.22049
138	846	B	14	6	97	99	129.48	146.63	126.905	62	61.5	59.9	58.4	56.8	57.7	59.6	60.3	60.9	62.4	1.23027
138	846	B	14	6	101	103	129.52	146.67	126.944	60.2	59.8	58.7	57.3	55.7	56.6	58.6	59.4	59.7	60.7	1.04234
138	846	B	14	6	105	107	129.56	146.71	126.983	58.9	58.3	57.1	55.6	54.2	55.3	57.4	58.2	59.2	61	0.906443
138	846	B	14	6	109	111	129.6	146.75	127.023	59.1	58.9	58	56.4	55.1	56.3	58.3	59.1	59.8	61.2	0.926633
138	846	B	14	6	113	115	129.64	146.79	127.062	55.8	55.3	54.3	52.8	51.3	52.6	54.8	55.6	56.2	57.5	0.582619
138	846	B	14	6	117	119	129.68	146.83	127.101	42.5	42.2	41.8	40.8	40.2	42.6	45.6	46.8	48.1	50.1	-0.801979
138	846	B	14	6	121	123	129.72	146.87	127.14	49.3	49.2	48.6	47.2	46	47.7	50.2	51	51.8	53.5	-0.0950039
138	846	B	14	6	125	127	129.76	146.91	127.18	44.2	44.8	44	42.6	41.2	43.1	45.7	46.6	46.9	48.8	-0.626324
138	846	B	14	6	129	131	129.8	146.95	127.219	47.3	47.1	46.1	44.7	43.4	45.1	47.8	48.5	49.1	50.4	-0.304365
138	846	B	14	6	133	135	129.84	146.99	127.257	47	47.8	47.4	46	44.7	46.6	49.1	49.8	50.5	52.3	-0.336205
138	846	B	14	6	137	139	129.88	147.03	127.296	49.4	50	49.7	48.4	47.3	49.6	52.3	53	53.8	55.5	-0.0870863
138	846	B	14	6	141	143	129.92	147.07	127.334	60	59.5	58.4	56.9	55.3	56.5	58.7	59.4	60.2	62	1.01531
138	846	B	14	6	145	147	129.96	147.11	127.373	65.1	64.7	63.9	62.4	61.2	62.4	64.3	65.2	65.5	67	1.54538
138	846	B	14	7	1	3	130.02	147.17	127.43	62	61.1	60.4	59.3	58.3	60.1	62.4	63.3	64.4	66.3	1.22187
138	846	B	14	7	5	7	130.06	147.21	127.469	68.1	67.5	66.5	64.8	62.9	63.6	65.2	65.7	66.3	68	1.856
138	846	B	14	7	9	11	130.1	147.25	127.507	65.5	65	63.6	62.2	60.7	61.6	63.5	64	64.2	65.7	1.58483
138	846	B	14	7	13	15	130.14	147.29	127.545	61.5	61.1	59.8	58.2	56.4	57.3	59.4	59.9	60.3	61.7	1.16798
138	846	B	14	7	17	19	130.18	147.33	127.584	57	56.3	55.2	53.7	52.3	53.4	55.6	56.2	56.8	58.3	0.69909
138	846	B	14	7	21	23	130.22	147.37	127.622	56.1	55.1	53.9	52.6	51.2	52.5	54.8	55.6	56.1	57.4	0.604816
138	846	B	14	7	25	27	130.26	147.41	127.661	59.4	59.9	58.8	56.6	54.5	55.2	57.2	57.7	57.9	59.3	0.947586
138	846	B	14	7	29	31	130.3	147.45	127.699	59.5	60.1	59	57.2	55.4	56.2	58.3	59	59.3	60.5	0.95737
138	846	B	14	7	33	35	130.34	147.49	127.738	52.9	52.5	51.6	50.2	49	50.6	53	53.9	54.7	56.1	0.269962
138	846	D	14	4	109	111	130.9	147.7	127.768	48.2	49.8	49.5	48.1	46.6	47.7	49.9	50.7	50.7	51.5	0.21268
138	846	B	14	7	37	39	130.38	147.53	127.776	56.3	56	55	53.6	52.3	53.9	56.2	57.1	57.7	59.2	0.623139
138	846	D	14	4	113	115	130.94	147.74	127.807	49.2	50.5	50.3	49.7	48.8	50.2	52.6	53.4	53.8	54.4	0.325771
138	846	B	14	7	41	43	130.42	147.57	127.815	56.7	56.9	56.4	55.2	54.2	56	58.3	59.3	59.9	61.6	0.66414
138	846	D	14	4	117	119	130.98	147.78	127.846	48.4	49.7	49.6	49.1	48.6	50.2	52.8	53.6	54.2	54.7	0.233054
138	846	D	14	4	121	123	131.02	147.82	127.885	52.5	54.1	54	52.9	51.5	52.4	54.4	55.2	55.2	56	0.700589
138	846	D	14	4	125	127	131.06	147.86	127.924	54.1	55.5	55.4	54.6	53.7	54.8	56.9	57.7	58.2	58.9	0.882282
138	846	D	14	4	129	131	131.1	147.9	127.963	56	56.9	56.5	55.4	54.4	55.3	57.3	58	58.2	58.9	1.09828
138	846	D	14	4	133	135	131.14	147.94	128.002	56.5	57.6	57.4	56.9	56.4	57.8	60.1	61.1	61.3	62	1.1542
138	846	D	14	4	137	139	131.18	147.98	128.042	58.2	60.5	60.9	60.4	59.9	61.3	63.4	64.1	64.3	64.8	1.34733
138	846	D	14	4	141	143	131.22	148.02	128.081	56.8	58.2	58.2	57.2	56.2	57.2	59.2	59.7	59.9	60.3	1.18601
138	846	D	14	4	145	147	131.26	148.06	128.139	61.3	63.1	62.9	61.6	60.2	60.7	62.4	62.8	62.7	63.3	1.69928
138	846	D	14	5	1	3	131.32	148.12	128.178	46.8	48.3	48.3	47.9	47.4	49.2	51.7	52.6	53.1	54.2	0.0395192
138	846	D	14	5	5	7	131.36	148.16	128.219	49.9	51.4	51.3	50.6	49.9	51.5	53.8	54.7	54.6	55.7	0.392719
138	846	D	14	5	9	11	131.4	148.2	128.258	52.1	53.8	54.1	53.7	53.3	55.2	57.8	58.5	58.9	59.6	0.643014
138	846	D	14	5	13	15	131.44	148.24	128.298	48.6	50.8	51	50.4	49.7	51.5	54	54.6	54.9	55.6	0.241587
138	846	D	14	5	17	19	131.48	148.28	128.337	45.5	47.2	47.1	46.2	45.3	46.8	49.3	49.9	50.1	50.9	-0.114105
138	846	D	14	5	21	23	131.52	148.32	128.378	46.7	48.9	48.9	47.6	46.3	47.5	49.8	50.1	50.2	50.6	0.0218537
138	846	D	14	5	25	27	131.56	148.36	128.417	43.3	45	44.7	43.4	42	43.3	45.6	46.2	46.1	47	-0.368139
138	846	D	14	5	29	31	131.6	148.4	128.457	39.8	41.6	41.6	40.4	39.2	41	43.6	44.3	44.3	45.1	-0.769566
138	846	D	14	5	33	35	131.64	148.44	128.497	42.5	44.4	44	42.5	40.9	42.2	44.6	45.1	45	45.8	-0.462101
138	846	D	14	5	37	39	131.68	148.48	128.538	43.2	44.8	44.3	42.9	41.3	42.5	44.8	45.4	45.3	45.9	-0.383312
138	846	D	14	5	41	43	131.72	148.52	128.58	43.8	44.8	44.3	43	41.7	42.9	45.3	45.9	46	46.8	-0.315956
138	846	D	14	5	45	47	131.76	148.56	128.62	47	48.5	47.9	46.1	44.1	44.8	46.9	47.4	47.2	47.7	0.048676
138	846	D	14	5	49	51	131.8	148.6	128.661	45.6	47.2	46.9	45.4	43.8	44.8	47.1	47.7	47.6	48.2	-0.112642
138	846	D	14	5	53	55	131.84	148.64	128.702	45.8	47.4	47.3	46	44.7	45.8	48.2	48.8	48.8	49.4	-0.0910218
138	846	D	14	5	57	59	131.88	148.68	128.743	43	43.9	43.8	42.9	41.9	43.4	45.9	46.7	47.1	48	-0.412411
138	846	D	14	5	61	63	131.92	148.72	128.784	47.1	48.4	48.2	46.9	45.2	46.1	48.3	49	49	49.6	0.0551234
138	846	D	14	5	65	67	131.96	148.76	128.824	49.1	51	50.7	49.2	47.4	48	50.3	50.8	50.9	51.5	0.282551
138	846	D	14	5	69	71	132	148.8	128.865	50.4	51.6	51.2	49.9	48.3	49	51.3	51.9	51.9	52.5	0.429943
138	846	D	14	5	73	75	132.04	148.84	128.906	47.9	50.2	50.6	49.6	48.7	50.4	52.9	53.6	53.6	54.4	0.142853
138	846	D	14	5	77	79	132.08	148.88	128.947	51.1	52.9	52.6	51.2	49.4	50.2	52.3	52.8	52.9	53.2	0.507487
138	846	D	14	5	81	83	132.12	148.92	128.988	47	47.6	47.1	46.1	44.9	46.2	48.5	49.3	49.6	50.3	0.0374579
138	846	D	14	5	85	87	132.16	148.96	129.028	47.2	48.9	49	48.3	47.8	49.5	52.1	53	53.1	54.4	0.0590784
138	846	D	14	5	89	91	132.2	149	129.07	47.5	49.7	49.9	49	47.9	49.3	51.7	52.3	52.3	52.8	0.0921325
138	846	D	14	5	93	95	132.24	149.04	129.11	43.7	45	45.1	44.6	44	45.8	48.5	49.4	49.8	50.6	-0.343595
138	846	D	14	5	97	99	132.28	149.08	129.151	49.8	51.4	51.4	50.4	49.4	50.6	52.9	53.7	53.5	54.2	0.352616
138	846	D	14	5	101	103	132.32	149.12	129.191	48	50.4	50.6	49.7	48.8	50.3	52.8	53.4	53.3	54	0.145562
138	846	D	14	5	105	107	132.36	149.16	129.232	42.2	43.5	43.3	42.5	41.8	43.6	46.2	47.1	47.4	48.2	-0.51884
138	846	D	14	5	109	111	132.4	149.2	129.274	42.2	43.1	43.1	42.4	41.9	43.8	46.5	47.3	47.7	48.4	-0.520086
138	846	D	14	5	113	115	132.44	149.24	129.314	50	52.5	52.7	51.6	50.3	51.3	53.6	54	53.8	54.4	0.370497
138	846	D	14	5	117	119	132.48	149.28	129.355	53.5	56.2	56.3	55	53.5	54.3	56.4	56.7	56.5	56.9	0.76943
138	846	D	14	5	121	123	132.52	149.32	129.396	55.6	57.9	58	57	55.8	56.8	58.8	59.3	59	59.5	1.00829
138	846	D	14	5	125	127	132.56	149.36	129.438	53.9	55.3	55.4	54.9	54.1	55.5	57.7	58.3	58.5	59.3	0.812672
138	846	D	14	5	129	131	132.6	149.4	129.478	52.6	54.1	54.4	53.9	53.2	54.5	56.7	57.4	57.5	58	0.662787
138	846	D	14	5	133	135	132.64	149.44	129.519	52.2	52.9	52.6	51.8	50.7	51.9	54.1	54.7	55	55.8	0.615806
138	846	D	14	5	137	139	132.68	149.48	129.56	49.5	50.8	50.9	50.3	49.4	50.8	53.1	54	54.1	55	0.30585
138	846	D	14	5	141	143	132.72	149.52	129.602	46.4	47.6	47.5	46.7	45.7	47	49.4	50.2	50.3	51.2	-0.0498422
138	846	D	14	5	145	147	132.76	149.56	129.664	47.1	48.4	48.2	46.9	45.3	46.4	48.7	49.4	49.4	50.2	0.0289466
138	846	D	14	6	1	3	132.82	149.62	129.705	41.1	41.9	41.7	40.6	39.3	41.4	45.1	46.2	46.2	46.9	-0.658945
138	846	D	14	6	5	7	132.86	149.66	129.746	42.4	43.4	43	41.7	40.1	41.3	43.7	44.3	44.4	45.7	-0.511554
138	846	D	14	6	9	11	132.9	149.7	129.789	43	44	43.7	42.3	40.8	42.1	44.5	45.1	45.1	46.4	-0.444197
138	846	D	14	6	13	15	132.94	149.74	129.831	41.9	43.8	44.1	43.3	42.4	44.4	47.2	48.1	48.3	49.3	-0.571215
138	846	D	14	6	17	19	132.98	149.78	129.873	43.2	44.8	44.8	43.8	42.7	44.3	46.8	47.6	47.6	48.4	-0.423824
138	846	D	14	6	21	23	133.02	149.82	129.916	42.6	44.3	44.5	43.7	42.7	44.4	47.1	47.8	47.8	49	-0.493673
138	846	D	14	6	25	27	133.06	149.86	129.959	47.8	49.3	49.2	48	46.5	47.4	49.7	50.6	50.4	50.9	0.0996339
138	846	D	14	6	29	31	133.1	149.9	130.002	48.9	50	49.8	48.9	47.9	49.1	51.3	52.1	52.3	53.1	0.224159
138	846	D	14	6	33	35	133.14	149.94	130.045	54.5	55.8	55.6	54.5	53	53.6	55.5	56.2	56.2	56.6	0.8632
138	846	D	14	6	37	39	133.18	149.98	130.089	56.9	58.5	58.3	57	55.5	56.1	58	58.5	58.4	59.1	1.13636
138	846	D	14	6	41	43	133.22	150.02	130.134	54.8	55.8	55.7	55.1	54.3	55.4	57.5	58.3	58.4	59.3	0.895008
138	846	D	14	6	45	47	133.26	150.06	130.18	53.3	54.5	54.5	53.9	53.2	54.6	56.8	57.6	57.7	58.8	0.722256
138	846	D	14	6	49	51	133.3	150.1	130.225	52.8	55.1	55.3	54	52.2	52.7	54.8	55.4	55.3	55.5	0.663841
138	846	D	14	6	53	55	133.34	150.14	130.269	43.9	44.8	44.3	43.3	42.2	43.6	46	46.6	46.8	48	-0.355006
138	846	D	14	6	57	59	133.38	150.18	130.313	42.6	43.6	43.5	42.8	42.1	43.7	46.4	47.1	47.3	48.3	-0.504891
138	846	B	15	1	1	3	130.52	150.22	130.348	51.3	51.2	50.7	49.8	48.6	50	52.4	53.5	54	55.6	0.0610102
138	846	D	14	6	61	63	133.42	150.22	130.356	45.6	47.2	47.1	46.1	44.9	46.3	48.7	49.5	49.6	49.9	-0.163126
138	846	B	15	1	5	7	130.56	150.26	130.391	50.1	50.2	49.2	47.7	46.3	47.6	50.2	50.6	51.4	52.9	-0.064482
138	846	D	14	6	65	67	133.46	150.26	130.394	40	40.7	40.5	39.6	38.8	40.5	43.1	44	44.3	45.4	-0.80466
138	846	B	15	1	9	11	130.6	150.3	130.433	49.6	49.2	48.2	46.7	45.4	47.2	49.4	50.2	50.9	52.1	-0.117133
138	846	B	15	1	13	15	130.64	150.34	130.474	43.2	43.6	42.8	41.4	40.1	41.9	44.6	45.3	46.1	47.5	-0.783728
138	846	B	15	1	17	19	130.68	150.38	130.516	36.9	37.2	36.4	35	34	36.2	39.2	40.1	40.6	42.1	-1.43992
138	846	B	15	1	21	23	130.72	150.42	130.557	31	31	30.4	29	28.1	30.4	33.6	34.7	35.1	37.2	-2.05448
138	846	B	15	1	25	27	130.76	150.46	130.597	30.4	30.6	30	28.8	27.9	30.2	33.4	34.4	35.2	37.2	-2.11754
138	846	B	15	1	29	31	130.8	150.5	130.636	32.6	32.6	31.7	30.2	28.9	31	34.3	35.3	35.8	37.7	-1.88924
138	846	B	15	1	33	35	130.84	150.54	130.676	41.1	41.1	40.4	39	37.7	39.5	42.2	43.3	43.9	45.4	-1.00536
138	846	B	15	1	37	39	130.88	150.58	130.716	44.6	44	43	42	41.1	42.9	45.8	46.6	47.1	48.9	-0.64178
138	846	B	15	1	41	43	130.92	150.62	130.755	49.3	49.4	48.6	46.9	45.2	46.2	48.6	49.3	49.8	51.2	-0.153328
138	846	B	15	1	45	47	130.96	150.66	130.793	50.9	51	50.3	48.8	47.1	48.3	50.5	51.4	52.1	53.9	0.012543
138	846	B	15	1	49	51	131	150.7	130.832	50.9	51.5	50.8	49	47.1	48	50.4	51.2	51.8	53.2	0.0119207
138	846	B	15	1	53	55	131.04	150.74	130.87	50.5	50.4	49.3	47.5	45.6	46.5	48.8	49.6	49.9	50.9	-0.0303236
138	846	B	15	1	57	59	131.08	150.78	130.909	51.9	52.3	50.9	48.4	45.9	46.3	48.4	49.3	49.7	50.3	0.114735
138	846	B	15	1	61	63	131.12	150.82	130.947	49.6	49.9	48.7	46.4	44.1	44.9	47.1	47.8	48.3	49.7	-0.125222
138	846	B	15	1	65	67	131.16	150.86	130.984	48.7	48.7	47.6	45.7	43.7	44.5	46.9	47.8	48.1	49.4	-0.219496
138	846	B	15	1	69	71	131.2	150.9	131.017	47.5	47	46.1	44.1	42.2	43.1	45.5	46.1	47	47.9	-0.344988
138	846	B	15	1	73	75	131.24	150.94	131.051	49.4	49.2	47.7	45.5	43.2	43.8	46	46.9	47.1	48.6	-0.147899
138	846	B	15	1	77	79	131.28	150.98	131.085	51.6	51.5	49.8	47.2	44.4	44.8	47.1	47.7	47.8	49.4	0.080407
138	846	B	15	1	81	83	131.32	151.02	131.119	46.1	45.4	44.2	42.4	40.8	42.2	44.6	45.7	46.1	48	-0.492536
138	846	B	15	1	85	87	131.36	151.06	131.152	51.9	52	50.9	48.7	46.7	47.5	49.4	50.6	50.5	51.8	0.11038
138	846	B	15	1	89	91	131.4	151.1	131.186	54.1	54	53.2	51.4	49.4	50.4	52.8	53.5	53.5	55.3	0.338687
138	846	B	15	1	93	95	131.44	151.14	131.22	54.9	55.2	54.1	52.3	50.7	51.7	53.9	54.7	55	56.6	0.421311
138	846	B	15	1	97	99	131.48	151.18	131.254	52.5	53.1	52.1	50.8	49.4	50.9	53.3	54.4	54.6	56.3	0.170949
138	846	B	15	1	101	103	131.52	151.22	131.287	54.4	54.9	53.9	52.4	50.6	51.8	53.9	54.9	54.9	56.8	0.368038
138	846	B	15	1	105	107	131.56	151.26	131.321	55.9	56	55.2	53.2	51.4	52.3	54.2	55.1	55.2	56.1	0.523503
138	846	B	15	1	109	111	131.6	151.3	131.355	48.6	48.8	48.3	47.2	46.1	48	50.6	51.6	52	53.3	-0.236744
138	846	B	15	1	113	115	131.64	151.34	131.389	50.1	50.5	49.8	48.5	47.1	48.7	51.2	51.8	52.4	54	-0.08128
138	846	B	15	1	117	119	131.68	151.38	131.422	50.2	49.7	48.7	47.3	46	47.6	50.1	50.8	51.4	53.2	-0.0714955
138	846	B	15	1	121	123	131.72	151.42	131.456	44.2	44.6	44.1	43	42.1	44.2	47	48	48.6	50.4	-0.696467
138	846	B	15	1	125	127	131.76	151.46	131.49	46.5	47.1	46.9	45.7	44.7	46.7	49.4	50.3	51	52.2	-0.457755
138	846	B	15	1	129	131	131.8	151.5	131.524	43	43.2	42.3	40.7	39.1	40.8	43.4	44.1	44.7	46.1	-0.822582
138	846	B	15	1	133	135	131.84	151.54	131.558	42.4	42.6	41.6	39.9	38.4	40.1	42.8	43.4	43.6	45.7	-0.885639
138	846	B	15	1	137	139	131.88	151.58	131.591	43.9	44.2	43.3	41.6	40.2	41.8	44.6	45.2	45.7	47.4	-0.730173
138	846	B	15	1	141	143	131.92	151.62	131.625	44.2	44.3	43.6	42	40.4	42.1	44.6	45.5	45.8	47.7	-0.699578
138	846	B	15	1	145	147	131.96	151.66	131.659	46.1	46.4	45.7	44.3	43.1	44.8	47.5	48.2	48.9	50.4	-0.50249
138	846	B	15	2	1	3	132.02	151.72	131.71	49.9	51	50.2	48.4	46.7	48	50.4	51.2	51	52.7	-0.108001
138	846	B	15	2	5	7	132.06	151.76	131.744	46.7	47.6	47.1	45.7	44.5	46.2	48.8	49.6	49.8	51.7	-0.44161
138	846	B	15	2	9	11	132.1	151.8	131.777	44.7	45.4	44.8	43.8	43	45.1	47.9	48.9	49.5	51.4	-0.650348
138	846	B	15	2	13	15	132.14	151.84	131.811	47.1	48.1	47.9	47	46.1	48.4	51.2	52.1	52.9	54.2	-0.401231
138	846	B	15	2	17	19	132.18	151.88	131.845	49.5	49.8	48.7	47.5	46.4	48.2	50.6	51.4	52	53.9	-0.152113
138	846	B	15	2	21	23	132.22	151.92	131.879	49.6	50.2	49.8	48.8	48	50.1	52.8	53.7	54.3	55.7	-0.142329
138	846	B	15	2	25	27	132.26	151.96	131.912	50.3	50.6	50	49.1	48.2	50.2	52.9	53.9	54.7	56.5	-0.07011
138	846	B	15	2	29	31	132.3	152	131.946	56.3	56.6	55.8	54.4	53.2	54.5	56.8	57.7	58.2	59.3	0.553617
138	846	B	15	2	33	35	132.34	152.04	131.98	48.6	49.1	48.6	47.5	46.7	48.7	51.3	52.2	52.9	54.4	-0.248253
138	846	B	15	2	37	39	132.38	152.08	132.014	46.6	45.9	45.2	44.1	43.3	45.3	48.1	49.1	50.1	52.1	-0.456992
138	846	B	15	2	41	43	132.42	152.12	132.047	52	52.4	51.8	50.8	49.6	51.3	53.8	54.7	55	56.5	0.1043
138	846	B	15	2	45	47	132.46	152.16	132.081	53.1	53.4	52.8	51.4	50	51.2	53.6	54.5	55	56.3	0.218142
138	846	B	15	2	49	51	132.5	152.2	132.114	49.9	50.4	50	49	48.2	50.2	53	54.1	54.8	55.9	-0.115467
138	846	B	15	2	53	55	132.54	152.24	132.147	50.4	49.5	48.6	47.5	46.5	48.3	50.9	51.9	52.8	54.1	-0.0640593
138	846	B	15	2	57	59	132.58	152.28	132.18	50.4	50.8	49.6	47.7	45.7	46.8	49.1	49.8	50.3	51.9	-0.0646815
138	846	B	15	2	61	63	132.62	152.32	132.213	56.3	56.4	55.1	53.1	51.2	51.9	54	54.6	54.8	55.8	0.54864
138	846	B	15	2	65	67	132.66	152.36	132.246	56.3	56.1	55.1	53.5	52	53.3	55.6	56.4	57.1	59	0.548018
138	846	B	15	2	69	71	132.7	152.4	132.279	56.4	57.4	56.3	54.2	52.4	53.1	55.1	55.8	55.8	57.3	0.557801
138	846	B	15	2	73	75	132.74	152.44	132.312	55.6	56.5	55.7	53.9	52	52.9	55.2	55.7	55.9	57.1	0.473934
138	846	B	15	2	77	79	132.78	152.48	132.345	56	56.6	55.4	53.1	50.7	51.1	53.1	53.6	53.6	54.9	0.514935
138	846	B	15	2	81	83	132.82	152.52	132.377	52.4	52	51.1	49.8	48.3	49.5	51.8	52.4	52.8	54.1	0.139703
138	846	B	15	2	85	87	132.86	152.56	132.41	50.6	49.2	48.2	47.2	46.2	47.9	50.4	51.3	52.2	53.4	-0.0482253
138	846	B	15	2	89	91	132.9	152.6	132.443	55.3	54.1	53.1	51.5	50.2	51.2	53.6	54.2	54.8	56.2	0.440227
138	846	B	15	2	93	95	132.94	152.64	132.475	52.3	51.8	50.7	48.7	47	47.8	50.2	50.9	51.2	52.8	0.12743
138	846	B	15	2	97	99	132.98	152.68	132.508	49	48.1	47.3	45.6	44.4	45.5	48.2	48.8	49.6	51	-0.216584
138	846	B	15	2	101	103	133.02	152.72	132.541	50.4	50.1	48.9	47.7	46.3	47.8	50.2	51.2	51.3	53.7	-0.0715254
138	846	B	15	2	105	107	133.06	152.76	132.573	51.6	51.2	50.2	48.5	46.4	47.4	49.7	50.2	50.9	52.2	0.0527234
138	846	B	15	2	109	111	133.1	152.8	132.606	52.8	52.9	51.3	49	46.5	47	49	49.7	49.6	50.4	0.176971
138	846	B	15	2	113	115	133.14	152.84	132.639	43.8	44.1	43	41.5	39.7	41.1	43.8	44.5	44.6	46.3	-0.760176
138	846	B	15	2	117	119	133.18	152.88	132.671	37.5	37.8	37	35.4	34	35.9	38.7	39.4	39.8	41.7	-1.41637
138	846	B	15	2	121	123	133.22	152.92	132.704	33	33.3	32.3	30.7	29.2	31.2	34.2	34.9	35.5	37.4	-1.88525
138	846	B	15	2	125	127	133.26	152.96	132.737	32.5	32.5	31.4	29.8	28.3	30.4	33.5	34.4	35.1	36.9	-1.9379
138	846	B	15	2	129	131	133.3	153	132.769	32.2	31.7	30.7	29	27.5	29.5	32.6	33.4	34.2	36.4	-1.96974
138	846	B	15	2	133	135	133.34	153.04	132.802	31.8	31.3	30.3	28.9	27.5	29.5	32.6	33.8	34.6	36.1	-2.01199
138	846	B	15	2	137	139	133.38	153.08	132.835	35.8	35.9	34.7	33.2	31.6	33.5	36.5	37.5	37.9	39.2	-1.59637
138	846	B	15	2	141	143	133.42	153.12	132.868	47.4	47.7	46.7	44.9	43.1	44.5	47.1	47.8	47.8	49.1	-0.389921
138	846	B	15	2	145	147	133.46	153.16	132.901	50.5	50.9	50	48.5	46.8	48.1	50.6	51.3	51.8	52.9	-0.0679626
138	846	B	15	3	1	3	133.52	153.22	132.951	51	51	50	48.6	47.4	48.8	51.3	52.3	52.7	54.5	-0.0168666
138	846	B	15	3	5	7	133.56	153.26	132.984	45.8	45.6	44.7	43.4	42	43.5	46.1	47	47.8	49.3	-0.558592
138	846	B	15	3	9	11	133.6	153.3	133.016	47.4	48.3	48.1	46.9	45.8	47.6	50.3	51.2	51.8	53.2	-0.392721
138	846	B	15	3	13	15	133.64	153.34	133.049	44	45	44.9	43.7	42.8	45	47.9	48.9	49.5	51.3	-0.747141
138	846	B	15	3	17	19	133.68	153.38	133.082	46.5	46.5	45.6	43.6	42	43.3	45.5	46.5	47	48.2	-0.487618
138	846	B	15	3	21	23	133.72	153.42	133.114	43.6	43.1	42.2	40.3	38.4	39.6	42.2	43.1	43.7	44.7	-0.790009
138	846	B	15	3	25	27	133.76	153.46	133.147	43.2	42.8	41.6	39.8	38	39.2	41.8	42.6	43.3	44.3	-0.832254
138	846	B	15	3	29	31	133.8	153.5	133.18	41	41.3	40.7	39.5	38.4	40.3	43.2	44.3	44.7	46.5	-1.0618
138	846	B	15	3	33	35	133.84	153.54	133.212	44.8	44.7	44	42.7	41.2	42.7	45.4	46.4	46.8	48.3	-0.667005
138	846	B	15	3	37	39	133.88	153.58	133.245	40.4	40.2	39.3	37.8	36.5	38.1	40.9	41.8	42.5	43.9	-1.12548
138	846	B	15	3	41	43	133.92	153.62	133.278	35.9	35.9	35.4	34.6	34	36.4	39.6	40.8	41.6	43.1	-1.59437
138	846	B	15	3	45	47	133.96	153.66	133.311	39.9	39.6	38.8	37.5	36.3	38	40.9	41.9	42.3	44.3	-1.17876
138	846	B	15	3	49	51	134	153.7	133.344	38.2	37.7	36.9	35.7	34.5	36.5	39.5	40.5	41	42.4	-1.35628
138	846	B	15	3	53	55	134.04	153.74	133.376	38.1	38.2	37.4	36.1	34.9	36.9	39.9	40.9	41.4	43	-1.36731
138	846	B	15	3	57	59	134.08	153.78	133.409	37.6	37.5	36.8	35.8	34.9	37	40.2	41.2	42	43.5	-1.41996
138	846	B	15	3	61	63	134.12	153.82	133.442	37.8	37.9	37.4	36.3	35.4	37.6	40.6	41.8	42.5	44.3	-1.39977
138	846	B	15	3	65	67	134.16	153.86	133.475	40.6	40.8	40.1	38.8	37.7	39.6	42.6	43.5	44.1	45.7	-1.10903
138	846	B	15	3	69	71	134.2	153.9	133.508	44.2	44.6	43.8	42.5	41.2	43	45.8	46.6	47.2	48.4	-0.735039
138	846	B	15	3	73	75	134.24	153.94	133.54	38.2	38.1	37.4	36.2	35.4	37.5	40.6	41.6	42.5	44.4	-1.36001
138	846	B	15	3	77	79	134.28	153.98	133.573	40.8	40.7	39.9	38.4	37	38.8	41.7	42.7	43.2	44.7	-1.09008
138	846	B	15	3	81	83	134.32	154.02	133.606	41	41.2	40.6	39.2	38	39.8	42.7	43.6	44.2	45.5	-1.06989
138	846	B	15	3	85	87	134.36	154.06	133.639	43	42.9	42.1	40.7	39.2	40.8	43.6	44.5	45	46.5	-0.862397
138	846	B	15	3	89	91	134.4	154.1	133.671	39.8	38.9	37.7	36.4	35.1	36.9	39.7	40.7	41.2	43	-1.19601
138	846	B	15	3	93	95	134.44	154.14	133.704	43.7	43.2	42.1	40.7	39.3	40.7	43.5	44.4	44.7	46.3	-0.7908
138	846	B	15	3	97	99	134.48	154.18	133.736	43.6	43	41.7	39.8	38.2	39.5	42.1	42.8	43.5	44.3	-0.801828
138	846	B	15	3	101	103	134.52	154.22	133.768	47	47	45.7	43.8	41.9	43.2	45.6	46.3	46.4	48	-0.448653
138	846	B	15	3	105	107	134.56	154.26	133.8	46.3	46.2	45.4	43.8	42.5	43.9	46.6	47.2	47.7	49	-0.522115
138	846	B	15	3	109	111	134.6	154.3	133.832	45.4	45.8	45.1	43.7	42.3	44	46.6	47.4	47.7	49	-0.61639
138	846	B	15	3	113	115	134.64	154.34	133.864	47.5	47.8	46.8	44.9	43.1	44.3	46.7	47.3	47.3	48.7	-0.39849
138	846	B	15	3	117	119	134.68	154.38	133.896	42.5	42.4	41.4	40.2	39.1	41	43.8	44.8	45.3	47.3	-0.919404
138	846	B	15	3	121	123	134.72	154.42	133.928	41.4	41.8	41.2	40.2	39.3	41.4	44.2	45.3	46	47.1	-1.03449
138	846	B	15	3	125	127	134.76	154.46	133.96	42.5	42.9	42.1	41	40	42	44.8	45.6	46.2	48.1	-0.920647
138	846	B	15	3	129	131	134.8	154.5	133.992	48.6	49.9	49.3	47.7	46.1	47.3	49.7	50.2	50.3	51.8	-0.286515
138	846	B	15	3	133	135	134.84	154.54	134.024	48.5	49.7	49.4	48.1	46.7	48	50.4	51.1	51.3	52.6	-0.297542
138	846	B	15	3	137	139	134.88	154.58	134.056	43.3	44.8	45.1	44.9	44.7	47.3	50.3	51.3	51.8	53.5	-0.839268
138	846	B	15	3	141	143	134.92	154.62	134.087	42.2	43.2	43.6	43.4	43.2	45.7	48.8	49.8	50.6	52	-0.954353
138	846	B	15	3	145	147	134.96	154.66	134.119	42.3	44	44.6	44.5	44.3	46.8	49.8	50.7	51.1	52.4	-0.94457
138	846	B	15	4	1	3	135.02	154.72	134.166	43.8	45.7	46.5	46.2	46.3	49.2	52.3	53.2	53.9	55.1	-0.789416
138	846	B	15	4	5	7	135.06	154.76	134.197	40.3	41.8	42.5	42.4	42.5	45.6	48.8	49.7	50.5	51.9	-1.15424
138	846	B	15	4	9	11	135.1	154.8	134.229	43.7	45.3	45.8	45.5	45.5	48.4	51.4	52.2	52.9	54.8	-0.801066
138	846	B	15	4	13	15	135.14	154.84	134.26	42.7	44	44.9	44.4	44.6	47.5	50.6	51.5	52.4	54.1	-0.905746
138	846	B	15	4	17	19	135.18	154.88	134.292	43.5	45.1	45.2	44.6	44.4	47	49.9	50.8	51.7	53	-0.823122
138	846	B	15	4	21	23	135.22	154.92	134.324	43.3	44.7	44.8	44.3	43.9	46.7	49.8	50.7	51.4	53.2	-0.844555
138	846	B	15	4	25	27	135.26	154.96	134.355	42.1	43.7	44.2	44	44.1	47.6	50.8	52	53	54.5	-0.970047
138	846	B	15	4	29	31	135.3	155	134.387	44.1	45.3	45.7	45.2	45.1	47.6	50.5	51.5	51.9	53.2	-0.762553
138	846	B	15	4	33	35	135.34	155.04	134.418	45.6	47.1	47.2	46.8	46.4	48.9	51.6	52.4	52.8	54.4	-0.607088
138	846	B	15	4	37	39	135.38	155.08	134.45	42.5	44.3	44.9	45	45.4	48.6	51.9	53	53.7	55.4	-0.930291
138	846	B	15	4	41	43	135.42	155.12	134.481	41.2	42.8	43.5	43.4	43.7	47	50.3	51.6	51.9	54.3	-1.06619
138	846	B	15	4	45	47	135.46	155.16	134.513	43.7	46.1	46.2	46.1	45.8	48.7	51.8	52.6	53.4	54.6	-0.806664
138	846	B	15	4	49	51	135.5	155.2	134.544	42.7	44.5	45.2	45.3	45.5	49	52.3	53.7	53.8	56.1	-0.911346
138	846	B	15	4	53	55	135.54	155.24	134.576	45.5	47.3	47.6	47.1	46.9	49.7	52.7	53.6	53.9	55	-0.620605
138	846	B	15	4	57	59	135.58	155.28	134.607	43	45	45.4	44.9	44.7	47.6	50.8	51.6	52.1	53.3	-0.881372
138	846	B	15	4	61	63	135.62	155.32	134.639	39.1	40.8	41.3	41.2	41.4	44.7	48.1	49.2	49.9	51.5	-1.28782
138	846	B	15	4	65	67	135.66	155.36	134.671	38	39.5	40.2	40.3	40.8	44.4	48	49.3	49.9	51.4	-1.40291
138	846	B	15	4	69	71	135.7	155.4	134.702	39.4	41.4	42.3	42.6	43.4	47.3	51.2	52.6	53.3	55.4	-1.25785
138	846	B	15	4	73	75	135.74	155.44	134.734	43.5	45.6	46.6	46.7	47.2	50.5	53.8	54.7	55.2	56.6	-0.831831
138	846	B	15	4	77	79	135.78	155.48	134.766	42.1	43.7	44.3	44.3	44.5	47.4	50.7	51.5	52.6	53.5	-0.978135
138	846	B	15	4	81	83	135.82	155.52	134.798	41.9	44.3	44.9	45	45.2	48.3	51.8	52.7	53	55	-0.999569
138	846	B	15	4	85	87	135.86	155.56	134.83	43.6	45.7	46.5	46.7	46.9	50.1	53.3	54.2	54.6	56.5	-0.823291
138	846	B	15	4	89	91	135.9	155.6	134.862	43.5	45.8	46.4	46.5	46.8	49.9	53.3	54.1	55	56	-0.834319
138	846	B	15	4	93	95	135.94	155.64	134.894	41.2	43.8	44.8	45	45.8	49.3	53.1	54	54.5	56.5	-1.07428
138	846	B	15	4	97	99	135.98	155.68	134.926	36.9	38.7	39.8	40.2	41	45	48.6	50.2	51.4	53.2	-1.52235
138	846	B	15	4	101	103	136.02	155.72	134.958	34.6	36.2	37	37.6	38.4	42.2	46.1	47.8	48.7	50.2	-1.76231
138	846	B	15	4	105	107	136.06	155.76	134.99	35.3	36.9	37.7	38.1	38.8	43.4	47.5	49.2	50.3	52.2	-1.69009
138	846	B	15	4	109	111	136.1	155.8	135.021	38.5	40.3	41	41.1	41.8	45.5	49.1	50.3	51.3	53.2	-1.35772
138	846	B	15	4	113	115	136.14	155.84	135.053	38	39.4	40	40	40.4	43.8	47.4	48.7	49.6	51.3	-1.41037
138	846	B	15	4	117	119	136.18	155.88	135.085	34.6	36	36.5	36.6	37.1	40.8	44.5	45.8	46.9	48.9	-1.76479
138	846	B	15	4	121	123	136.22	155.92	135.117	33.9	35.6	36.1	36.2	36.9	40.6	44.3	45.6	46.6	48.4	-1.83826
138	846	B	15	4	125	127	136.26	155.96	135.149	35	36.8	37.4	37.3	37.9	41.4	45.1	46.4	47	48.9	-1.72441
138	846	B	15	4	129	131	136.3	156	135.181	36	37.4	37.8	37.7	37.9	41.2	44.6	45.7	46.5	48.2	-1.62098
138	846	B	15	4	133	135	136.34	156.04	135.213	37.1	38.5	39.1	39	39.2	42.4	45.8	46.8	47.7	48.9	-1.50714
138	846	B	15	4	137	139	136.38	156.08	135.245	33.7	34.7	35.2	35	35.4	38.9	42.4	43.5	44.2	46.3	-1.86156
138	846	B	15	5	1	3	136.52	156.22	135.357	28.5	30.1	31	31.5	32.6	38.1	42.9	45.2	47.2	49.2	-2.40484
138	846	B	15	5	5	7	136.56	156.26	135.389	35	36.8	37.3	37.3	37.9	41.6	45.2	46.6	47.3	49.3	-1.72908
138	846	B	15	5	9	11	136.6	156.3	135.421	39.6	41.6	42.1	41.8	42.1	45.2	48.4	49.5	49.9	52.1	-1.25103
138	846	B	15	5	13	15	136.64	156.34	135.453	42.6	44.1	44.3	43.8	43.5	46.2	49	50	50.4	52.1	-0.939482
138	846	B	15	5	17	19	136.68	156.38	135.485	41.4	42.3	42.3	41.7	41.3	43.8	46.7	47.5	48.4	50.1	-1.06497
138	846	B	15	5	21	23	136.72	156.42	135.517	44	45.8	45.7	44.9	44.2	46.4	49.3	49.9	50.2	51.5	-0.795044
138	846	B	15	5	25	27	136.76	156.46	135.55	42.6	43.8	43.8	42.8	42.1	44.4	47	47.8	48.3	49.2	-0.941347
138	846	B	15	5	29	31	136.8	156.5	135.582	42.6	43.5	43.2	42.1	41.3	43.6	46.3	46.7	47.7	48.8	-0.94197
138	846	B	15	5	33	35	136.84	156.54	135.614	41.1	42.2	42	41.5	41.5	44.2	47.4	48.4	49.3	51.3	-1.09868
138	846	B	15	5	37	39	136.88	156.58	135.646	44.8	45.3	45.2	44.7	44.1	46.4	49.4	50.3	50.9	52.6	-0.714285
138	846	B	15	5	41	43	136.92	156.62	135.678	40.4	41.3	41.7	41.5	41.7	44.6	47.9	49.2	50.1	51.6	-1.17276
138	846	B	15	5	45	47	136.96	156.66	135.711	43.9	44.4	44.1	43.6	43	45	47.9	49.1	49.7	50.8	-0.809182
138	846	B	15	5	49	51	137	156.7	135.743	43.1	43.6	43.2	42.4	41.9	44	46.9	48	48.4	49.5	-0.893051
138	846	B	15	5	53	55	137.04	156.74	135.775	44.1	43.9	43.3	42.7	42.2	44.4	47.4	48.3	48.6	50.8	-0.789616
138	846	B	15	5	57	59	137.08	156.78	135.807	39.8	39.9	39.6	39	38.6	41	43.9	44.9	46	48	-1.23769
138	846	B	15	5	61	63	137.12	156.82	135.84	43.4	44.3	43.9	42.9	42.2	44.2	47	48.3	48.7	50	-0.8637
138	846	B	15	5	65	67	137.16	156.86	135.872	39.1	38.5	37.9	37	36.3	38.6	41.7	42.5	43.2	45.5	-1.31177
138	846	B	15	5	69	71	137.2	156.9	135.904	40.8	41.2	40.6	39.9	39.5	41.9	45	46	46.8	48.1	-1.1355
138	846	B	15	5	73	75	137.24	156.94	135.937	47.1	47.9	47	45.4	43.9	45.2	48	48.5	48.7	50.2	-0.48055
138	846	B	15	5	77	79	137.28	156.98	135.969	46.3	46.3	45.6	44	42.7	44.2	46.9	47.7	48.1	49.4	-0.564419
138	846	B	15	5	81	83	137.32	157.02	136.001	42.2	42	41.6	40.8	40.2	42.3	45.3	46.3	47	48	-0.99168
138	846	B	15	5	85	87	137.36	157.06	136.034	41.2	41.9	41.9	41.4	41.4	44.2	47.4	48.6	49.6	51.3	-1.09636
138	846	B	15	5	89	91	137.4	157.1	136.066	51.1	52.4	51.8	50.3	49	50.6	53	53.6	53.8	54.6	-0.0668065
138	846	B	15	5	93	95	137.44	157.14	136.099	54.4	54.9	54.3	53.2	52.1	53.4	55.8	56.5	57	58.2	0.275964
138	846	B	15	5	97	99	137.48	157.18	136.131	45.4	46.3	46.2	45.6	45.4	48.2	51.1	52	52.7	54.3	-0.661183
138	846	B	15	5	101	103	137.52	157.22	136.163	46.6	45.8	45.4	45	44.9	47.5	50.4	51.8	52.7	54.1	-0.536935
138	846	B	15	5	105	107	137.56	157.26	136.196	46.2	46.3	45.8	45.1	44.9	47.4	50.4	51.9	52.5	54.7	-0.579181
138	846	B	15	5	109	111	137.6	157.3	136.228	45.3	44.8	44.6	44.1	43.7	46.3	49.2	50.5	51.1	53.4	-0.673455
138	846	B	15	5	113	115	137.64	157.34	136.26	46.8	47.8	47.4	46.9	46.4	49	51.7	52.8	53.3	55.3	-0.51799
138	846	B	15	5	117	119	137.68	157.38	136.292	46.4	47.2	46.9	46.3	45.7	48	50.8	51.6	52.4	53.6	-0.560235
138	846	B	15	5	121	123	137.72	157.42	136.324	48.7	49.4	49.1	48.1	47.5	49.6	52.3	53	53.2	54.4	-0.321523
138	846	B	15	5	125	127	137.76	157.46	136.357	52.1	53.1	52.5	50.9	49.5	51	53.5	54	54	54.9	0.031653
138	846	B	15	5	129	131	137.8	157.5	136.389	46.6	46.8	46.2	45.1	44.2	46.1	48.8	49.5	50.1	52	-0.54129
138	846	B	15	5	133	135	137.84	157.54	136.421	38.7	38.7	38.2	37.3	36.5	38.7	41.8	42.6	43.2	45.4	-1.36397
138	846	B	15	5	137	139	137.88	157.58	136.452	43.2	44	43.3	42.1	41	42.9	45.7	46.3	47	48.4	-0.896332
138	846	B	15	5	141	143	137.92	157.62	136.484	37	37.8	37.4	36.3	35.5	37.9	41	41.9	42.7	43.8	-1.54212
138	846	B	15	5	145	147	137.96	157.66	136.516	32.6	32.7	32	31.1	30.1	32.6	35.9	36.8	37.5	38.6	-2.00059
138	846	B	15	6	1	3	138.02	157.72	136.564	28	27.5	27	26.2	25.7	28.4	31.9	33.1	33.9	35.7	-2.4802
138	846	B	15	6	5	7	138.06	157.76	136.596	32.5	32.8	32.1	30.9	29.7	31.9	35.1	36	36.6	38.2	-2.01256
138	846	B	15	6	9	11	138.1	157.8	136.628	36.9	38	37.5	36	34.6	36.6	39.5	40.2	40.7	42	-1.55532
138	846	B	15	6	13	15	138.14	157.84	136.66	39.4	40.2	39.3	37.8	36.4	38.1	41.1	41.9	41.8	43.9	-1.2958
138	846	B	15	6	17	19	138.18	157.88	136.692	42.3	42.8	42.1	40.7	39.3	40.9	43.8	44.6	44.7	46.8	-0.994651
138	846	B	15	6	21	23	138.22	157.92	136.724	44.5	44.5	44.1	43.1	42.2	44.2	46.9	47.8	48.5	50.1	-0.766344
138	846	B	15	6	25	27	138.26	157.96	136.756	42	41.4	40.7	39.9	39.5	41.9	44.8	45.9	46.7	48.3	-1.02711
138	846	B	15	6	29	31	138.3	158	136.788	44.9	44.8	44.3	43.8	43.5	45.8	48.6	49.7	50.7	52.4	-0.725965
138	846	B	15	6	33	35	138.34	158.04	136.82	45.4	45.6	45.5	45.1	45	47.6	50.6	51.8	52.7	54.2	-0.674558
138	846	B	15	6	37	39	138.38	158.08	136.851	48.8	49.7	49.6	49.1	48.9	51.2	54	54.9	56	56.9	-0.321383
138	846	B	15	6	41	43	138.42	158.12	136.883	49.7	50.1	49.9	48.8	48.1	49.9	52.5	53.3	53.9	54.9	-0.228351
138	846	B	15	6	45	47	138.46	158.16	136.915	53.8	54.3	53.9	52.9	51.7	52.9	55.4	56.3	56.2	56.9	0.197665
138	846	B	15	6	49	51	138.5	158.2	136.947	54.3	55.2	54.7	53.6	52.6	54	56.4	57.2	57.3	58.2	0.249073
138	846	B	15	6	53	55	138.54	158.24	136.979	44.8	44.9	44.3	43.8	43.6	46.1	49	49.8	50.6	52.5	-0.740103
138	846	B	15	6	57	59	138.58	158.28	137.011	51	51.2	50.9	49.9	49	50.7	53.2	54	54.4	55.9	-0.0955639
138	846	B	15	6	61	63	138.62	158.32	137.043	50	50.4	49.8	48.7	47.6	49.2	51.7	52.5	53.2	54.4	-0.200245
138	846	B	15	6	65	67	138.66	158.36	137.075	53	54.3	53.9	52.5	51.5	53.1	55.4	56.2	56.4	57.7	0.111308
138	846	B	15	6	69	71	138.7	158.4	137.107	51	52.6	52.3	51.3	50.5	52.4	55	55.8	56.1	57.5	-0.0974307
138	846	B	15	6	73	75	138.74	158.44	137.139	44.2	44	43.3	42.5	41.9	44.1	47	48	48.6	50.1	-0.805649
138	846	B	15	6	77	79	138.78	158.48	137.171	46.6	47.4	46.6	45.2	44	45.7	48.3	49.1	49.5	50.8	-0.556532
138	846	B	15	6	81	83	138.82	158.52	137.203	48.8	49.1	48.1	46.7	45.3	46.6	49.1	49.8	50.2	51.2	-0.328225
138	846	B	15	6	85	87	138.86	158.56	137.235	50.9	51.3	50.4	48.7	46.9	48	50.3	51	51	52.1	-0.110325
138	846	B	15	6	89	91	138.9	158.6	137.268	48	47.7	46.7	45	43.4	44.7	47.1	47.8	48	49.1	-0.412716
138	846	B	15	6	93	95	138.94	158.64	137.3	44.1	44.1	43.4	42.1	41	42.8	45.6	46.5	46.9	48.2	-0.819166
138	846	B	15	6	97	99	138.98	158.68	137.332	41.7	41.2	40.4	39.2	38	39.8	42.6	43.6	44.2	45.8	-1.06953
138	846	B	15	6	101	103	139.02	158.72	137.364	44	43.9	42.9	41.3	39.7	41.2	43.9	44.7	45	46.1	-0.830816
138	846	B	15	6	105	107	139.06	158.76	137.397	39.6	38.9	37.7	36.2	34.7	36.2	39	39.8	40.3	41.8	-1.28929
138	846	B	15	6	109	111	139.1	158.8	137.429	41	40.7	40	38.4	36.9	38.6	41.3	42.2	42.7	44.3	-1.14423
138	846	B	15	6	113	115	139.14	158.84	137.461	42.3	41.7	40.3	39	37.6	39.4	42.1	42.9	43.7	45	-1.00958
138	846	B	15	6	117	119	139.18	158.88	137.493	43.8	43	41.8	40.8	39.7	41.6	44.3	45.1	46	47.3	-0.854116
138	846	B	15	6	121	123	139.22	158.92	137.525	52.3	52	51.2	49.2	47.7	48.6	51	51.5	52	52.5	0.0297575
138	846	B	15	6	125	127	139.26	158.96	137.558	45.9	45.7	44.6	43.1	41.7	43.1	45.6	46.4	47.3	48.1	-0.636838
138	846	B	15	6	129	131	139.3	159	137.602	43.4	42.7	41.6	40.1	38.9	40.6	43	43.8	44.3	45.9	-0.897605
138	846	B	15	6	133	135	139.34	159.04	137.65	46	45.6	44.8	43.5	42.3	44	46.7	47.5	48.2	49.9	-0.627677
138	846	B	15	6	137	139	139.38	159.08	137.698	48.9	49.1	48	46.6	45	46.3	48.9	49.4	49.7	51.1	-0.326529
138	846	B	15	6	141	143	139.42	159.12	137.746	43.1	42.3	41.1	39.7	38.6	40.5	43.2	44.1	44.9	46.7	-0.93069
138	846	B	15	6	145	147	139.46	159.16	137.794	49.4	49.9	49	47.5	45.9	47.2	49.7	50.4	50.6	51.6	-0.275745
138	846	B	15	7	1	3	139.52	159.22	137.866	44.1	44.5	44.1	43.4	43.2	45.5	48.5	49.6	50.5	51.4	-0.828186
138	846	B	15	7	5	7	139.56	159.26	137.914	47.4	47.3	46.7	45.6	44.5	46.1	48.8	49.8	50.1	51	-0.485417
138	846	B	15	7	9	11	139.6	159.3	137.962	55.2	55.3	54.1	52.1	50.1	51	53.1	53.7	54.1	55.5	0.325616
138	846	B	15	7	13	15	139.64	159.34	138.01	51.2	50.9	50.2	49.2	48.4	50.1	52.8	53.8	54.5	56	-0.0912391
138	846	B	15	7	17	19	139.68	159.38	138.058	57.7	58.5	57.8	56.1	54.4	55.3	57.3	57.8	57.9	58.7	0.584518
138	846	B	15	7	21	23	139.72	159.42	138.106	57.2	57.8	57.1	55.8	54.4	55.3	57.5	58.4	58.3	59	0.531867
138	846	B	15	7	25	27	139.76	159.46	138.154	56.1	55.7	54.7	53.2	51.8	52.9	54.9	55.7	56.1	57.7	0.416781
138	846	B	15	7	29	31	139.8	159.5	138.202	55.2	54.6	53.4	52	50.6	52	54.4	55.1	55.4	56.9	0.322506
138	846	B	15	7	33	35	139.84	159.54	138.25	55.8	55.2	54.2	52.6	51.2	52.4	54.5	55.5	55.3	56.9	0.384318
138	846	B	15	7	37	39	139.88	159.58	138.298	53.9	53.7	52.9	51.7	50.1	51.2	53.7	54.6	54.8	55.9	0.185986
138	846	B	15	7	41	43	139.92	159.62	138.346	53.7	54	53.1	51.3	49.3	50.1	52.2	53	53.4	54.1	0.164552
138	846	B	15	7	45	47	139.96	159.66	138.385	48.2	48	47.2	45.4	43.6	45	47.5	48	48.5	50.1	-0.40839
138	846	B	15	7	49	51	140	159.7	138.414	48.7	48.6	47.5	45.9	44.2	45.5	47.8	48.5	48.7	50.4	-0.356984
138	846	B	15	7	53	55	140.04	159.74	138.444	50	49.7	48.6	46.9	45.1	46.2	48.4	49.1	49.5	50.5	-0.222331
138	846	B	15	7	57	59	140.08	159.78	138.473	44.1	43.5	42.7	41.7	40.7	42.6	45.3	46.2	46.9	48.8	-0.836896
138	846	B	15	7	61	63	140.12	159.82	138.503	46.5	45.7	44.9	43.6	42.4	44.2	46.6	47.5	48.2	49.4	-0.587778
138	846	B	16	1	1	3	140.02	160.22	138.503	56.1	55.8	54.8	53.6	52.5	53.9	56.3	57	57.7	58.7	0.388629
138	846	B	15	7	65	67	140.16	159.86	138.532	55.5	55.8	55.2	53.6	51.9	53	55.3	56.1	56.2	57.1	0.348125
138	846	B	16	1	5	7	140.06	160.26	138.533	52.1	51.8	51.2	49.8	48.8	50.3	52.7	53.4	54.3	54.7	-0.0282261
138	846	B	15	7	69	71	140.2	159.9	138.553	54.8	54.8	53.9	52.3	50.6	51.5	53.7	54.4	54.7	56.1	0.274661
138	846	B	16	1	9	11	140.1	160.3	138.562	49.8	48.9	48	46.8	45.3	46.8	49.2	50	50.9	51.7	-0.268181
138	846	B	15	7	73	75	140.24	159.94	138.587	48.4	47.4	46.6	45.9	45.4	47.5	50.2	51.2	51.9	53.5	-0.391934
138	846	B	16	1	13	15	140.14	160.34	138.591	52.3	53.1	51.8	49.7	47.7	48.3	50.3	51.1	50.9	52	-0.00865838
138	846	B	16	1	17	19	140.18	160.38	138.62	44.3	44	42.9	41.5	40.3	41.9	44.5	45.3	45.7	47.4	-0.841747
138	846	B	15	7	77	79	140.28	159.98	138.628	60	60.3	59.2	57.1	54.9	55.3	57.2	57.6	57.5	58.5	0.81452
138	846	B	16	1	21	23	140.22	160.42	138.648	51.8	51.7	50.6	48.8	46.9	47.9	49.9	50.7	50.9	51.9	-0.0619318
138	846	B	16	1	25	27	140.26	160.46	138.677	55	54.7	53.5	51.7	49.7	50.5	52.5	53.1	53	54.3	0.270432
138	846	B	16	1	29	31	140.3	160.5	138.705	57.7	57.4	56.2	54.3	52.6	53.7	55.9	56.4	56.8	57.8	0.550768
138	846	B	16	1	33	35	140.34	160.54	138.733	55.9	55	53.8	52.2	50.6	51.6	53.7	54.4	54.6	55.7	0.362841
138	846	B	16	1	37	39	140.38	160.58	138.761	56.9	55.7	54.1	52.2	50.3	51.2	53.2	53.8	54.1	54.8	0.466277
138	846	B	16	1	41	43	140.42	160.62	138.789	58	57.5	56.3	54.3	52.2	53	54.7	55.6	55.5	56.6	0.580119
138	846	B	16	1	45	47	140.46	160.66	138.818	52.6	51.4	49.9	48.2	46.4	47.4	49.8	50.5	50.4	52.1	0.0175824
138	846	B	16	1	49	51	140.5	160.7	138.847	50.9	50.5	49.4	47.7	45.9	47	49.3	50.1	50.6	51.7	-0.159939
138	846	B	16	1	53	55	140.54	160.74	138.875	56.7	57	55.9	53.9	52	52.8	54.8	55.4	55.5	56.7	0.442976
138	846	B	16	1	57	59	140.58	160.78	138.903	53.5	52.7	51.3	49.5	47.9	48.9	51	51.8	52.2	53.2	0.109368
138	846	B	16	1	61	63	140.62	160.82	138.931	62.5	62.1	60.7	58.9	57.1	57.7	59.5	60.2	60.5	61.6	1.04527
138	846	B	16	1	65	67	140.66	160.86	138.961	62.2	61.7	60.6	59.1	57.6	58.5	60.4	61.1	61.6	62.9	1.01343
138	846	B	16	1	69	71	140.7	160.9	138.99	64.1	63.1	61.6	60	58.6	59.6	61.3	62	62.5	63.8	1.21052
138	846	B	16	1	73	75	140.74	160.94	139.02	64.3	63.8	62.3	60.8	59.1	59.9	61.6	62.1	62.4	63.6	1.23071
138	846	B	16	1	77	79	140.78	160.98	139.05	66	65.7	64.3	62.1	59.6	59.7	61.2	61.5	61.6	62.4	1.40699
138	846	B	16	1	81	83	140.82	161.02	139.081	69.7	69.7	68.5	66.7	64.6	64.7	66.3	66.5	66.8	67.4	1.79138
138	846	B	16	1	85	87	140.86	161.06	139.111	66.8	66.9	65.7	63.8	62	62.5	64.1	64.4	64.3	65.3	1.48899
138	846	B	16	1	89	91	140.9	161.1	139.142	59.3	58.7	57.6	56.4	55.4	56.6	58.8	59.8	60.2	61.6	0.707929
138	846	B	16	1	93	95	140.94	161.14	139.173	51.3	51.5	50.7	49.7	48.7	50.4	52.9	53.7	54.3	55.6	-0.125159
138	846	B	16	1	97	99	140.98	161.18	139.204	52.9	52.6	51.7	50.3	49.1	50.6	52.9	53.5	53.8	55.1	0.0407117
138	846	B	16	1	101	103	141.02	161.22	139.236	50.2	50.7	49.9	48.6	47.1	48.5	50.9	51.4	51.8	53.8	-0.240867
138	846	B	16	1	105	107	141.06	161.26	139.267	48.9	48.8	47.8	46.2	44.8	46.1	48.7	49.3	49.7	51.1	-0.376766
138	846	B	16	1	109	111	141.1	161.3	139.298	43.1	42	40.7	39.3	38	39.7	42.3	43.3	43.7	45.2	-0.980926
138	846	B	16	1	113	115	141.14	161.34	139.33	49.5	49.3	48.1	46	44	44.9	47.3	48	48.1	49.2	-0.315575
138	846	B	16	1	117	119	141.18	161.38	139.361	54.2	54.1	52.9	50.8	48.4	49.1	51.1	51.6	51.8	52.9	0.172877
138	846	B	16	1	121	123	141.22	161.42	139.393	56.7	56.2	54.9	53	51	51.8	53.8	54.4	54.8	55.9	0.432401
138	846	B	16	1	125	127	141.26	161.46	139.425	60.1	59.8	58.4	56.3	54.1	54.4	56.1	56.7	56.7	57.5	0.785576
138	846	B	16	1	129	131	141.3	161.5	139.457	63.8	63.3	61.7	59.6	57.3	57.5	59.2	59.5	59.7	60.7	1.16997
138	846	B	16	1	133	135	141.34	161.54	139.489	65	64.7	63.2	60.8	58.1	58	59.5	59.9	60.2	60.6	1.29422
138	846	B	16	1	137	139	141.38	161.58	139.521	62.7	62.6	61.1	58.9	56.5	56.9	58.4	58.9	59.2	60	1.05426
138	846	B	16	1	141	143	141.42	161.62	139.553	58.5	57.7	55.9	53.9	51.8	52.4	54.2	54.8	55.2	55.6	0.616595
138	846	B	16	1	145	147	141.46	161.66	139.585	49.8	49.1	47.6	45.7	43.9	45	47.2	47.8	48.1	49.8	-0.289334
138	846	B	16	2	1	3	141.52	161.72	139.633	56.1	55.8	54.3	52.2	50.1	50.5	52.5	53.4	53.3	54.3	0.3653
138	846	B	16	2	5	7	141.56	161.76	139.665	56.2	56.2	54.7	52.9	50.9	51.4	53.4	54	54.3	55.2	0.375084
138	846	B	16	2	9	11	141.6	161.8	139.697	57.5	57.4	56.2	54.3	52.4	53.2	55.2	55.7	56.2	57.5	0.509738
138	846	B	16	2	13	15	141.64	161.84	139.73	60.6	60.7	58.9	56.7	54.2	54.5	56.2	56.7	56.5	57.8	0.831695
138	846	B	16	2	17	19	141.68	161.88	139.762	60.8	59.9	58.5	56.9	55.3	56.4	58.3	59.1	59.6	60.6	0.851885
138	846	B	16	2	21	23	141.72	161.92	139.795	59.5	59	58.2	56.5	54.9	55.9	58.1	58.6	59.1	59.9	0.715988
138	846	B	16	2	25	27	141.76	161.96	139.827	63.6	64	63	61	59.1	59.9	61.6	61.9	62.3	62.8	1.142
138	846	B	16	2	29	31	141.8	162	139.86	54.2	53.7	52.5	51.2	50.1	51.6	53.8	54.8	55.2	56.3	0.163235
138	846	B	16	2	33	35	141.84	162.04	139.893	51.4	51.4	50.9	49.8	49	51.1	53.5	54.3	55	56.5	-0.128751
138	846	B	16	2	37	39	141.88	162.08	139.926	61.5	62.5	61.6	59.8	58	59.1	61	61.3	61.5	63	0.921616
138	846	B	16	2	41	43	141.92	162.12	139.958	60.1	60.4	59.3	58.1	56.7	58.1	60.2	60.9	61.5	63	0.775312
138	846	B	16	2	45	47	141.96	162.16	139.991	64.4	64.2	63.1	61.1	59.1	59.6	61.5	61.9	62.2	63.1	1.22214
138	846	B	16	2	49	51	142	162.2	140.024	64	64.1	63	61.3	59.7	60.6	62.5	63.2	63.2	64.4	1.17989
138	846	B	16	2	53	55	142.04	162.24	140.057	67.7	67.8	66.3	64.1	61.8	62.1	63.6	64	63.9	64.7	1.56429
138	846	B	16	2	57	59	142.08	162.28	140.09	71	70.8	69.4	67.2	64.9	64.9	66.2	66.6	66.7	67.8	1.90706
138	846	B	16	2	61	63	142.12	162.32	140.123	69.4	68.9	67.4	65.5	63.5	64	65.6	66.2	66.3	67.3	1.73994
138	846	B	16	2	65	67	142.16	162.36	140.155	66.3	66.2	65.2	63.8	62.3	63.1	65	65.6	65.9	67.1	1.41674
138	846	B	16	2	69	71	142.2	162.4	140.188	61.7	61.2	60.3	58.9	57.5	58.6	60.8	61.7	62	62.9	0.93745
138	846	B	16	2	73	75	142.24	162.44	140.221	64.6	64.3	62.9	61.5	59.9	60.9	62.8	63.2	63.9	64.7	1.2386
138	846	B	16	2	77	79	142.28	162.48	140.254	63.2	63.6	62.6	61.3	59.8	61	62.9	63.6	63.8	65.3	1.09229
138	846	B	16	2	81	83	142.32	162.52	140.287	55.5	56.4	55.6	54	52.4	53.9	55.9	56.5	57	57.8	0.290423
138	846	B	16	2	85	87	142.36	162.56	140.319	54.9	55.4	54.4	52.9	51.5	52.9	55.1	55.8	55.9	57.4	0.227365
138	846	B	16	2	89	91	142.4	162.6	140.352	58.5	58.7	57.9	56.3	54.9	56	58.1	58.8	59.1	60.1	0.601354
138	846	B	16	2	93	95	142.44	162.64	140.385	62.6	63	62.2	60.4	58.6	59.4	61.3	61.8	61.9	63.1	1.02737
138	846	B	16	2	97	99	142.48	162.68	140.418	66.8	66.5	65.4	64	62.9	64.2	66	66.6	67.4	69.2	1.46379
138	846	B	16	2	101	103	142.52	162.72	140.451	67.8	67.4	66.4	65.2	64.1	65.3	67.2	67.8	68.6	70	1.56723
138	846	B	16	2	105	107	142.56	162.76	140.485	69.1	69.3	68.5	67.3	66.1	67.1	68.7	69.6	70	71.6	1.70188
138	846	B	16	2	109	111	142.6	162.8	140.519	68.1	68.3	67.5	66.3	65.5	66.8	68.5	69.3	69.7	71.5	1.5972
138	846	B	16	2	113	115	142.64	162.84	140.552	66.8	66.3	65.6	64.3	63.1	64.1	65.8	66.5	67.2	68.6	1.46131
138	846	B	16	2	117	119	142.68	162.88	140.586	68.6	67.8	66.9	65.5	64	64.8	66.4	67.1	67.5	68.1	1.64799
138	846	B	16	2	121	123	142.72	162.92	140.62	74.1	73.9	72.5	70.8	68.9	69.2	70.5	71.1	71.8	72	2.21969
138	846	B	16	2	125	127	142.76	162.96	140.653	69.3	69.1	67.9	66.3	64.6	65.1	66.6	67.3	67.7	68.7	1.71958
138	846	B	16	2	129	131	142.8	163	140.687	68.7	68.6	67.3	65.2	62.9	62.9	64.2	64.7	64.9	65.7	1.65653
138	846	B	16	2	133	135	142.84	163.04	140.721	66.6	66.3	64.8	62.6	60.3	60.3	61.9	62.4	62.3	63.2	1.43738
138	846	B	16	2	137	139	142.88	163.08	140.755	67.9	67.7	65.9	63.3	60.7	60.6	62	62.3	62.2	62.7	1.57204
138	846	B	16	2	141	143	142.92	163.12	140.788	65.8	66	64.8	63	61.1	61.7	63.3	63.6	63.7	64.5	1.35289
138	846	B	16	2	145	147	142.96	163.16	140.822	59.4	59.5	58.8	57.6	56.5	58	60	60.6	61	62.5	0.686296
138	846	B	16	3	2	4	143.03	163.23	140.881	57.7	58.2	57.6	56.4	55.3	56.8	59	59.6	59.7	61	0.508309
138	846	B	16	3	6	8	143.07	163.27	140.915	58	59	58.5	57.2	56	57.3	59.4	59.8	60	61.1	0.538903
138	846	B	16	3	10	12	143.11	163.31	140.949	49.8	51.1	50.9	50	49.3	51.4	54	54.7	55	56	-0.314996
138	846	B	16	3	14	16	143.15	163.35	140.983	47.7	48.3	47.8	46.6	45.4	47.1	49.6	50.3	50.6	51.9	-0.534141
138	846	B	16	3	18	20	143.19	163.39	141.017	50.7	52	51.5	50.2	48.9	50.5	52.8	53.2	53.3	54.3	-0.222589
138	846	B	16	3	22	24	143.23	163.43	141.05	49.3	50.1	50	49.1	48.4	50.5	53	53.7	54.2	55.5	-0.368892
138	846	B	16	3	26	28	143.27	163.47	141.084	54.6	55.4	54.9	53.6	52.3	53.8	55.9	56.4	56.7	57.8	0.181995
138	846	B	16	3	30	32	143.31	163.51	141.118	52.9	53.7	53.4	52.5	51.6	53.4	55.9	56.5	57	58.5	0.00447322
138	846	B	16	3	34	36	143.35	163.55	141.152	57.1	58.4	58	56.9	55.9	57.3	59.4	60	60.5	61.4	0.440896
138	846	B	16	3	38	40	143.39	163.59	141.186	56.8	58	57.5	56.4	55.3	56.7	59	59.4	59.5	60.9	0.409056
138	846	B	16	3	42	44	143.43	163.63	141.22	57.4	58.1	57.7	56.3	55	56.2	58.3	58.8	59.2	59.8	0.470869
138	846	B	16	3	46	48	143.47	163.67	141.253	56.2	56.7	56.5	56	55.5	57.6	59.9	61	61.5	62.2	0.345377
138	846	B	16	3	50	52	143.51	163.71	141.287	57.7	58.3	57.8	56.8	55.8	57.3	59.4	59.9	60.2	61.8	0.500843
138	846	B	16	3	54	56	143.55	163.75	141.321	56.4	57.1	56.2	54.6	53.2	54.4	56.5	57	56.8	57.6	0.364945
138	846	B	16	3	58	60	143.59	163.79	141.355	55.5	56.4	56	54.7	53.5	55	57.3	57.8	57.9	58.7	0.270671
138	846	B	16	3	62	64	143.63	163.83	141.389	55.7	56.8	56.4	55.3	54.5	56.1	58.4	59.1	59.4	60.5	0.290859
138	846	B	16	3	66	68	143.67	163.87	141.423	52.9	53.9	53.9	53.3	52.9	55.3	57.9	58.5	59	60.5	-0.00112485
138	846	B	16	3	70	72	143.71	163.91	141.456	60.2	61.6	61.2	59.9	58.8	60.2	62.2	62.4	62.1	63.2	0.757878
138	846	B	16	3	74	76	143.75	163.95	141.49	60	61	60.3	58.7	57.3	58.2	60.2	60.4	60.2	61.3	0.736445
138	846	B	16	3	78	80	143.79	163.99	141.524	57.6	58.4	57.6	56.1	54.8	55.9	57.9	58.1	58.3	59	0.486082
138	846	B	16	3	82	84	143.83	164.03	141.558	53.1	54	53.4	52	50.9	52.5	54.7	55.3	55.6	55.9	0.0171983
138	846	B	16	3	86	88	143.87	164.07	141.592	50.2	51.1	50.1	48.3	46.5	47.8	50	50.3	50.5	51.4	-0.285194
138	846	B	16	3	90	92	143.91	164.11	141.626	41.2	41.7	40.7	39	37.4	39	41.5	42	42.1	43.9	-1.22234
138	846	B	16	3	94	96	143.95	164.15	141.659	43.3	43.8	43.1	41.9	40.8	42.6	45.2	45.9	45.9	47.3	-1.00444
138	846	B	16	3	98	100	143.99	164.19	141.693	42.5	42.5	41.4	39.8	38.2	39.8	42.1	42.9	42.8	44.2	-1.08831
138	846	B	16	3	102	104	144.03	164.23	141.727	48.2	48.6	47.5	45.3	43.4	44.5	46.8	47.2	47.3	48.2	-0.495798
138	846	B	16	3	106	108	144.07	164.27	141.761	50.6	51.1	49.9	48.1	46.3	47.4	49.6	50.1	50.3	51.3	-0.246681
138	846	B	16	3	110	112	144.11	164.31	141.795	51.2	51.7	50.9	49.6	48.3	49.8	52	52.5	52.8	53.8	-0.184867
138	846	B	16	3	114	116	144.15	164.35	141.828	51.5	52.3	51.6	50.5	49.5	51.1	53.4	54	54.5	55.2	-0.154272
138	846	B	16	3	118	120	144.19	164.39	141.862	48.2	49.3	49.4	49	48.6	51.2	53.8	54.7	55.1	56.6	-0.498287
138	846	B	16	3	122	124	144.23	164.43	141.896	48.6	49.8	50.1	49.8	49.8	52.7	55.6	56.8	57.3	58.9	-0.457285
138	846	B	16	3	126	128	144.27	164.47	141.93	53.6	54.2	53.8	52.9	52.1	54	56.4	57.1	57.7	59	0.0623832
138	846	B	16	3	130	132	144.31	164.51	141.964	59.3	60.2	59.5	58.1	56.8	58	60	60.6	60.7	61.4	0.654894
138	846	B	16	3	134	136	144.35	164.55	141.997	59.7	60.2	59.5	58	56.8	58	60.1	60.6	60.9	62	0.695895
138	846	B	16	3	138	140	144.39	164.59	142.031	60.8	61.4	60.5	58.9	57.3	58.2	60.1	60.5	60.8	61.9	0.809737
138	846	B	16	3	142	144	144.43	164.63	142.065	57.9	57.6	56.6	55.2	53.8	55	57	57.6	57.8	59.5	0.507346
138	846	B	16	4	2	4	144.53	164.73	142.149	53.4	53.3	52.3	51.1	49.5	50.8	52.9	53.4	54.1	55.5	0.0375279
138	846	B	16	4	6	8	144.57	164.77	142.183	54	54.6	53.9	52.9	52.4	54.1	56.7	57.2	57.8	59.1	0.0993412
138	846	B	16	4	10	12	144.61	164.81	142.217	55.8	55.9	54.9	53.1	51.5	52.4	54.5	55.2	55.2	56	0.286024
138	846	B	16	4	14	16	144.65	164.85	142.25	57.2	57.2	56	54.4	52.8	53.8	55.9	56.5	56.8	57.9	0.431083
138	846	B	16	4	18	20	144.69	164.89	142.284	58.2	58.4	57.2	55.6	54.1	55.4	57.4	58.1	58.2	59.5	0.53452
138	846	B	16	4	22	24	144.73	164.93	142.318	53	52.5	51.6	50.4	49.4	50.9	53.1	53.8	54.1	55.1	-0.00720554
138	846	B	16	4	26	28	144.77	164.97	142.352	50.3	50.3	49.9	49.2	48.8	51.2	53.9	54.8	55.3	56.3	-0.288785
138	846	B	16	4	30	32	144.81	165.01	142.386	57.5	57.8	57.1	56.4	55.6	57.2	59.7	60.3	60.8	62.4	0.459813
138	846	B	16	4	34	36	144.85	165.05	142.419	64.4	64.8	63.8	62.1	60.5	61.3	63.2	63.6	63.4	63.8	1.17719
138	846	B	16	4	38	40	144.89	165.09	142.453	55.8	54.9	53.9	52.8	51.8	53.3	55.5	56.3	56.8	57.9	0.281668
138	846	B	16	4	42	44	144.93	165.13	142.487	61.4	62	61.2	59.6	58	58.9	60.9	61.6	61.8	62.6	0.863774
138	846	B	16	4	46	48	144.97	165.17	142.521	62	61.8	60.7	59.4	58.1	59.1	61.1	61.8	62.3	63.4	0.925586
138	846	B	16	4	50	52	145.01	165.21	142.555	65.7	67.1	66.2	64.7	63.6	64.6	66.7	67.2	67.3	68.4	1.30998
138	846	B	16	4	54	56	145.05	165.25	142.589	67.2	68.2	66.9	64.8	62.3	62.6	64	64.6	64.3	65.2	1.46545
138	846	B	16	4	58	60	145.09	165.29	142.622	59.6	60.3	59.1	57.3	55.3	56	58	58.5	58.7	59.5	0.67398
138	846	B	16	4	62	64	145.13	165.33	142.656	56.8	55.8	54.6	53.2	51.8	53	54.8	55.6	56.1	57.7	0.381995
138	846	B	16	4	66	68	145.17	165.37	142.69	54.7	53.5	52.2	50.5	49.1	50.2	52.2	52.8	53	54.5	0.162851
138	846	B	16	4	70	72	145.21	165.41	142.724	63.8	63.3	62.2	60.5	58.6	59.2	61	61.3	61.4	62.4	1.10916
138	846	B	16	4	74	76	145.25	165.45	142.758	64.2	63.2	62	60.6	59.5	60.3	62.4	62.9	63.4	64.5	1.15016
138	846	B	16	4	78	80	145.29	165.49	142.792	58.3	58	56.4	54.9	53.6	54.7	56.7	57.2	58	58.8	0.535593
138	846	B	16	4	82	84	145.33	165.53	142.826	66.5	66.4	65.4	63.9	62.2	62.8	64.6	64.9	65.1	65.6	1.38825
138	846	B	16	4	86	88	145.37	165.57	142.86	61.6	61.4	60.7	59.5	58.6	60	61.9	62.9	63	63.7	0.877742
138	846	B	16	4	90	92	145.41	165.61	142.893	64.7	64.9	64.1	62.9	61.6	62.9	64.8	65.4	65.8	67	1.1997
138	846	B	16	4	94	96	145.45	165.65	142.927	68.6	68.8	68.4	67	65.7	66.8	68.5	69.2	69.2	70.2	1.60491
138	846	B	16	4	98	100	145.49	165.69	142.961	59.2	58.9	58	56.8	55.5	56.8	58.8	59.4	59.8	60.5	0.626135
138	846	B	16	4	102	104	145.53	165.73	142.995	60	60.1	59.3	57.8	56.3	57.4	59.4	60	60.4	61.4	0.70876
138	846	B	16	4	106	108	145.57	165.77	143.029	60.1	58.8	57.4	56	54.8	56	57.9	58.6	59.2	60.4	0.718544
138	846	B	16	4	110	112	145.61	165.81	143.062	66.3	66	64.7	62.9	61	61.5	63.1	63.6	63.6	64	1.36308
138	846	B	16	4	114	116	145.65	165.85	143.095	69.9	69.3	68.2	66.6	64.8	65.2	66.7	67.2	67.2	68.4	1.73707
138	846	B	16	4	118	120	145.69	165.89	143.128	63.9	64.2	63.6	62.6	61.8	63.5	65.6	66.3	66.5	67.4	1.1121
138	846	B	16	4	122	124	145.73	165.93	143.16	65.7	65.7	65	63.7	62.4	63.5	65.2	65.9	65.9	67.5	1.29878
138	846	B	16	4	126	128	145.77	165.97	143.193	74.5	74.9	74.1	72.3	70.5	70.6	72	72.1	72.2	72.9	2.21387
138	846	B	16	4	130	132	145.81	166.01	143.226	70.6	70.3	68.9	67.2	65.4	65.7	67.2	67.4	67.7	68.3	1.80742
138	846	B	16	4	134	136	145.85	166.05	143.258	68.6	68.2	67	65.1	63.1	63.4	64.9	65.3	65.4	65.9	1.59868
138	846	B	16	4	138	140	145.89	166.09	143.291	59.7	58.9	57.7	56.1	54.8	55.9	58	58.3	59	59.9	0.671944
138	846	B	16	4	142	144	145.93	166.13	143.324	67.6	67.2	66	64.4	62.6	63.3	64.9	65.4	65.6	66.4	1.49338
138	846	B	16	5	2	4	146.03	166.23	143.405	49.4	50	49.7	48.8	48.1	50	52.5	53.2	53.6	54.7	-0.402034
138	846	B	16	5	6	8	146.07	166.27	143.438	52	52.5	51.7	50	48.1	49.1	51.4	51.8	51.6	52.5	-0.132105
138	846	B	16	5	10	12	146.11	166.31	143.471	43	42.8	41.8	40.3	38.8	40.3	42.9	43.7	44	45	-1.06925
138	846	B	16	5	14	16	146.15	166.35	143.503	45	45.1	44.1	42.4	40.8	42.1	44.6	45.3	45.3	46.5	-0.861757
138	846	B	16	5	18	20	146.19	166.39	143.536	43.3	43.4	42.6	41.1	39.6	41.2	43.8	44.4	44.8	45.7	-1.03928
138	846	B	16	5	22	24	146.23	166.43	143.568	41.6	41.2	40.3	38.9	37.8	39.7	42.5	43.2	43.6	44.8	-1.2168
138	846	B	16	5	26	28	146.27	166.47	143.601	47.3	47.5	46.7	45.2	43.5	44.8	47.2	48	48.3	48.8	-0.62429
138	846	B	16	5	30	32	146.31	166.51	143.633	48	48.1	47.2	45.5	43.7	45	47.3	48.1	48.2	49.1	-0.552071
138	846	B	16	5	34	36	146.35	166.55	143.666	45.1	45	44.1	42.7	41.4	43	45.6	46.1	46.5	48.3	-0.854462
138	846	B	16	5	38	40	146.39	166.59	143.698	50	49.6	48.3	46.6	45	46.3	48.7	49.3	49.4	50.4	-0.345199
138	846	B	16	5	42	44	146.43	166.63	143.73	50.1	50.8	49.8	47.8	45.9	46.9	49.2	49.9	49.9	50.9	-0.335414
138	846	B	16	5	46	48	146.47	166.67	143.761	47.3	47.7	47	45.7	44.3	45.9	48.4	49.2	49.6	50.7	-0.6274
138	846	B	16	5	50	52	146.51	166.71	143.793	44	42.9	42.2	41.2	40.2	42.1	44.8	45.8	46	47.1	-0.971414
138	846	B	16	5	54	56	146.55	166.75	143.825	50.4	50.5	49.7	48	46.4	47.6	50	50.5	50.8	51.5	-0.306064
138	846	B	16	5	58	60	146.59	166.79	143.857	47.8	47.5	46.9	45.4	44.1	45.8	48.2	49.2	49.7	50.8	-0.577238
138	846	B	16	5	62	64	146.63	166.83	143.888	53.8	53.8	52.9	51.2	49.4	50.4	52.6	53.1	53.3	54.8	0.0464906
138	846	B	16	5	66	68	146.67	166.87	143.92	51.2	50.7	50.1	49	47.8	49.3	51.7	52.8	53.3	54.5	-0.224684
138	846	B	16	5	70	72	146.71	166.91	143.951	56.2	56.8	55.9	54.6	53.4	54.5	56.7	57.2	57.4	58.1	0.294986
138	846	B	16	5	74	76	146.75	166.95	143.983	59.1	59	57.9	55.6	53.2	53.5	55.3	55.6	55.8	56.4	0.596133
138	846	B	16	5	78	80	146.79	166.99	144.014	55.9	55.9	55	53.5	52.1	53.1	55.2	55.8	56.1	57	0.262525
138	846	B	16	5	82	84	146.83	167.03	144.045	60	60.5	59.6	58.2	56.7	57.7	59.6	60.2	60.7	61.2	0.688541
138	846	B	16	5	86	88	146.87	167.07	144.076	57.8	58.3	57.5	56.3	55.1	56.3	58.4	59.1	59.4	60	0.458991
138	846	B	16	5	90	92	146.91	167.11	144.107	53.8	53.9	53.1	51.9	50.9	52.5	54.8	55.5	56.1	56.9	0.0421358
138	846	B	16	5	94	96	146.95	167.15	144.138	55.1	55	53.8	52.1	50.6	51.7	53.9	54.5	54.9	55.8	0.176789
138	846	B	16	5	98	100	146.99	167.19	144.169	56.4	56.4	55.5	54.3	53	54.3	56.3	57	57.3	58.3	0.311443
138	846	B	16	5	102	104	147.03	167.23	144.201	54.5	54.8	53.9	52.2	50.7	51.9	54	54.6	54.6	55.3	0.11311
138	846	B	16	5	106	108	147.07	167.27	144.232	48.4	47.5	46.6	45.1	43.8	45.4	47.8	48.5	48.8	50	-0.522267
138	846	B	16	5	110	112	147.11	167.31	144.263	46.3	46.4	45.7	44.6	43.6	45.3	48	48.8	49.2	50.5	-0.741413
138	846	B	16	5	114	116	147.15	167.35	144.294	43.4	43.9	43.1	41.7	40.3	42.1	44.7	45.4	45.4	47.2	-1.0438
138	846	B	16	5	118	120	147.19	167.39	144.325	40	39.8	39	37.4	36.1	37.9	40.8	41.5	41.7	42.9	-1.39822
138	846	B	16	5	122	124	147.23	167.43	144.356	38	37.8	37	35.9	35	37.1	40.1	40.9	41.3	42.6	-1.60696
138	846	B	16	5	126	128	147.27	167.47	144.387	40.2	40.5	39.7	38.3	37.2	39.2	42	42.6	43.5	45.3	-1.37866
138	846	B	16	5	130	132	147.31	167.51	144.419	42.6	43.1	42.6	41.4	40.2	42.2	45	45.7	45.9	47.5	-1.12954
138	846	B	16	5	134	136	147.35	167.55	144.45	45.7	47.1	46.8	45.6	44.7	46.7	49.3	49.8	50.2	51.1	-0.80758
138	846	B	16	5	138	140	147.39	167.59	144.482	47.3	48.5	48.2	47.2	46.4	48.4	51.1	51.8	51.9	52.9	-0.641709
138	846	B	16	5	142	144	147.43	167.63	144.513	50.2	50.9	50.6	49.7	49	51	53.6	54.3	54.6	55.7	-0.340562
138	846	B	16	5	146	148	147.47	167.67	144.545	46.2	46	45.3	44.3	43.4	45.4	48	48.9	49.4	50.9	-0.757418
138	846	B	16	6	1	3	147.52	167.72	144.585	53.3	54.2	53.6	52.4	51.2	52.8	55.3	56	55.9	57.2	-0.0193806
138	846	B	16	6	5	7	147.56	167.76	144.617	52.6	52.7	51.8	50.5	49.5	50.9	53.2	54	54.4	55.4	-0.092844
138	846	B	16	6	9	11	147.6	167.8	144.648	50.9	51.1	50.2	49.2	48.4	50.1	52.6	53.4	53.8	55.2	-0.270365
138	846	B	16	6	13	15	147.64	167.84	144.68	43.6	43.3	42.4	41.3	40.5	42.6	45.3	46.2	46.8	48.5	-1.03061
138	846	B	16	6	17	19	147.68	167.88	144.713	54	54.7	53.9	52.5	51	52.3	54.5	55.1	55.2	56.2	0.0509713
138	846	B	16	6	21	23	147.72	167.92	144.746	52.7	53.2	52.5	51.2	49.9	51.3	53.8	54.4	54.6	56	-0.0849264
138	846	B	16	6	25	27	147.76	167.96	144.779	51.7	51	49.8	48.3	47	48.3	50.5	51.1	51.6	53	-0.189608
138	846	B	16	6	29	31	147.8	168	144.811	50	50.1	49.4	48.4	47.5	49.3	51.8	52.7	53.3	54.6	-0.367129
138	846	B	16	6	33	35	147.84	168.04	144.844	54.5	54.9	53.9	52.2	50.3	51.1	53.3	54.1	54.4	55.1	0.100512
138	846	B	16	6	37	39	147.88	168.08	144.877	56.2	56.3	54.9	52.6	50.3	50.8	52.8	53.2	53.1	53.7	0.276789
138	846	B	16	6	41	43	147.92	168.12	144.91	56.7	57	55.3	53	50.6	51	52.9	53.3	53.2	54.1	0.328196
138	846	B	16	6	45	47	147.96	168.16	144.944	61	61.3	59.8	57.4	54.7	54.7	56.4	56.7	56.5	57.4	0.775025
138	846	B	16	6	49	51	148	168.2	144.98	60.5	61	60	58.3	56.9	58	59.9	60.2	60.7	61.7	0.722374
138	846	B	16	6	53	55	148.04	168.24	145.016	54.5	55.4	55	53.9	53	54.9	57.2	57.9	58.2	59.2	0.0974008
138	846	B	16	6	57	59	148.08	168.28	145.051	61	61.2	60.1	58.7	57.4	58.6	60.7	61.3	61.5	62.6	0.773158
138	846	B	16	6	61	63	148.12	168.32	145.086	62.6	63.1	62.1	60.5	58.9	59.8	61.7	62.3	62.4	63.2	0.939029
138	846	B	16	6	65	67	148.16	168.36	145.124	62.8	62.6	61.5	59.8	58.1	59.1	61	61.4	61.5	62.8	0.959219
138	846	B	16	6	69	71	148.2	168.4	145.163	60.7	61.3	60.5	58.8	57.3	58.3	60.3	60.7	60.8	61.3	0.740075
138	846	B	16	6	73	75	148.24	168.44	145.201	66.5	67.3	66.3	64.3	62.2	62.6	64.2	64.5	64.3	64.9	1.34299
138	846	B	16	6	77	79	148.28	168.48	145.24	58.1	58.6	58	57.1	56.3	58.1	60.3	60.9	61.2	62.4	0.468278
138	846	B	16	6	81	83	148.32	168.52	145.278	64.6	65	64.2	63	61.9	63	64.9	65.2	65.9	66.2	1.14404
138	846	B	16	6	85	87	148.36	168.56	145.317	69.2	70.1	69.1	67.7	66.2	67	68.7	69.1	69.1	69.6	1.62208
138	846	B	16	6	89	91	148.4	168.6	145.356	64.2	65.3	64.6	62.8	61.2	62	63.8	64.2	64	64.5	1.10117
138	846	B	16	6	93	95	148.44	168.64	145.395	65.8	66.5	65.8	64.5	63.3	64.3	66.1	66.6	66.4	67.4	1.26704
138	846	B	16	6	97	99	148.48	168.68	145.435	60.2	61.4	60.9	59.5	58.3	59.7	61.8	62.1	62.3	63.1	0.68369
138	846	B	16	6	101	103	148.52	168.72	145.474	55.3	55.5	54.8	53.4	52.3	53.6	55.9	56.4	56.5	58.2	0.173182
138	846	B	16	6	105	107	148.56	168.76	145.514	60.6	61.2	60.5	59	57.6	58.7	60.7	61.1	61	62.1	0.72407
138	846	B	16	6	109	111	148.6	168.8	145.555	55.5	56	55.1	53.6	52.3	53.7	55.7	56.3	56.5	57.2	0.19275
138	846	B	16	6	113	115	148.64	168.84	145.595	53.6	54.7	53.8	52.4	50.8	52.3	54.4	54.9	54.9	55.9	-0.00558311
138	846	B	16	6	117	119	148.68	168.88	145.636	50.1	51.5	51	49.5	48.3	49.9	52.3	52.7	52.9	53.6	-0.37041
138	846	B	16	6	121	123	148.72	168.92	145.677	52.5	53.5	52.9	51.3	50.1	51.5	54.1	54.2	54.5	55.8	-0.121291
138	846	B	16	6	125	127	148.76	168.96	145.719	52	53.3	52.8	51.5	50.3	52	54.4	55	55.2	56.3	-0.173942
138	846	B	16	6	129	131	148.8	169	145.762	51.7	52.4	52	51.2	50.6	52.8	55.4	56.2	56.5	57.8	-0.205782
138	846	B	16	6	133	135	148.84	169.04	145.81	55.8	56.2	55.9	55	54.2	56.1	58.4	59.3	59.8	60.8	0.220234
138	846	B	16	6	137	139	148.88	169.08	145.861	61.5	62.4	61.7	60.2	58.7	59.9	61.9	62.3	62.2	63.6	0.812745
138	846	B	16	6	141	143	148.92	169.12	145.911	65	66.1	64.9	63.1	61.4	62.2	64	64.2	64.3	65.5	1.17633
138	846	B	16	6	145	147	148.96	169.16	145.962	63.5	63.7	62.8	61.1	59.6	60.5	62.3	62.9	62.9	64.3	1.01962
138	846	B	16	7	2	4	149.03	169.23	146.05	62.9	63.3	62.4	60.6	59	59.9	61.7	62.3	62.5	63.4	0.956094
138	846	B	16	7	6	8	149.07	169.27	146.101	67.7	67.4	66.2	64.5	62.7	63.1	64.9	65.4	65.5	66.3	1.45495
138	846	B	16	7	10	12	149.11	169.31	146.151	66.2	66.1	65.1	63.7	62.3	63.6	65.5	66.1	66.3	67.6	1.29824
138	846	B	16	7	14	16	149.15	169.35	146.196	66.7	66.3	65	63.4	61.9	62.9	64.8	65.6	66	67.1	1.34965
138	846	B	16	7	18	20	149.19	169.39	146.24	72.4	72.8	71.6	69.7	67.8	68	69.3	69.8	70	70.7	1.94216
138	846	B	16	7	22	24	149.23	169.43	146.282	75.6	75.8	74.6	72.7	70.9	71.1	72.4	72.8	72.5	73.5	2.27452
138	846	B	16	7	26	28	149.27	169.47	146.323	68	67.8	66.8	65.3	63.9	64.8	66.5	67.1	67.5	68.5	1.48306
138	846	B	16	7	30	32	149.31	169.51	146.365	78	78	77	75.4	74	74.8	76.3	76.9	77	77.8	2.52302
138	846	B	16	7	34	36	149.35	169.55	146.405	73.3	73.1	72.4	70.9	69.5	70.5	72	72.7	73.2	74.1	2.03332
138	846	B	16	7	38	40	149.39	169.59	146.445	71.1	71.3	70.3	68.9	67.4	68.3	69.8	70.3	70.3	71.2	1.80377
138	846	B	16	7	42	44	149.43	169.63	146.485	75.5	76.3	75	72.7	70.2	70.1	71.2	71.4	71.1	71.6	2.26101
138	846	B	16	7	46	48	149.47	169.67	146.525	72.2	71.8	70.4	68.7	66.8	67.2	68.6	69.1	69.3	69.9	1.91699
138	846	B	16	7	50	52	149.51	169.71	146.564	72.2	72.2	71.2	69.6	68.2	69	70.4	71	71	71.7	1.91637
138	846	B	16	7	54	56	149.55	169.75	146.603	72	72.3	71.3	69.9	68.3	69.1	70.7	71.1	71.2	72	1.89494
138	846	D	16	4	97	99	149.78	169.78	146.634	53	55	54.9	53.6	52.2	53.1	55.1	55.6	55.4	55.9	0.0734332
138	846	D	16	4	103	105	149.84	169.84	146.682	49.6	51.7	51.8	50.9	49.9	51.3	53.6	54.1	54	54.6	-0.317183
138	846	D	16	4	109	111	149.9	169.9	146.738	47.5	49.7	49.8	48.9	47.9	49.4	51.8	52.4	52.3	52.9	-0.559161
138	846	D	16	4	115	117	149.96	169.96	146.795	45	47.3	47.7	47.4	47	49.3	51.9	52.7	52.8	53.4	-0.846872
138	846	D	16	4	121	123	150.02	170.02	146.852	48.3	51.4	51.6	50.4	49.1	50.5	52.7	53.1	52.7	53.2	-0.471429
138	846	D	16	4	127	129	150.08	170.08	146.907	45.8	48.3	48.7	47.8	46.7	48.4	50.9	51.4	51.2	51.8	-0.759142
138	846	D	16	4	133	135	150.14	170.14	146.964	46.1	48.2	48.4	47.7	46.9	48.6	51.1	51.7	51.8	52.3	-0.726711
138	846	D	16	4	139	141	150.2	170.2	147.017	43.7	46.3	46.9	46.4	46	48.3	51.1	51.8	51.8	52.4	-1.00299
138	846	D	16	4	145	147	150.26	170.26	147.064	54.6	56.3	56.5	55.9	55.2	56.7	58.9	59.6	59.8	60.5	0.241414
138	846	D	16	5	1	3	150.32	170.32	147.113	57.2	58.8	58.6	57.5	56.3	57.2	59.1	59.6	59.5	60.1	0.536821
138	846	D	16	5	7	9	150.38	170.38	147.161	59.7	61.2	61	60.1	58.9	60	61.9	62.4	62.3	62.8	0.820795
138	846	D	16	5	13	15	150.44	170.44	147.209	54.1	56.1	56.1	55.1	54	55	57.1	57.6	57.4	57.7	0.178637
138	846	D	16	5	19	21	150.5	170.5	147.257	58.8	61	61.1	60.2	59.1	60.3	62.3	62.8	62.5	63	0.714152
138	846	D	16	5	25	27	150.56	170.56	147.304	57	59.2	59.4	58.4	57.1	58.2	60.2	60.5	60.3	60.8	0.506475
138	846	D	16	5	31	33	150.62	170.62	147.35	49.7	51.9	52	51.1	50.2	51.8	54.1	54.6	54.5	55	-0.330055
138	846	D	16	5	37	39	150.68	170.68	147.397	48.4	50.5	50.7	50	49.2	50.8	53.1	53.7	53.5	54.1	-0.480563
138	846	D	16	5	43	45	150.74	170.74	147.442	55.1	58.2	58.8	58.2	57.7	59.4	61.7	62.3	62.1	62.5	0.283625
138	846	D	16	5	49	51	150.8	170.8	147.487	58.7	60.8	61.1	60.6	60	61.5	63.6	64.2	64.1	64.6	0.693369
138	846	D	16	5	55	57	150.86	170.86	147.534	60.1	61.9	62.1	61.3	60.4	61.7	63.7	64.2	64.1	64.6	0.851572
138	846	D	16	5	61	63	150.92	170.92	147.58	66.7	68.2	68.1	67.3	66.4	67.5	69.3	69.7	69.6	69.8	1.60433
138	846	D	16	5	67	69	150.98	170.98	147.626	62.4	64.1	64.1	63.3	62.4	63.5	65.4	65.9	65.7	66.2	1.11081
138	846	B	17	1	20	22	149.71	170.96	147.631	57.6	58.3	57.6	56.2	55	56.1	58.3	58.7	59	59.1	0.394009
138	846	B	17	1	24	26	149.75	171	147.661	53.6	53.2	52.2	51	49.9	51.3	53.6	54.4	54.6	55.3	-0.0228462
138	846	B	17	1	28	30	149.79	171.04	147.69	53.7	53.9	53	51.7	50.3	51.7	53.9	54.7	54.8	55.2	-0.013063
138	846	B	17	1	32	34	149.83	171.08	147.72	48.7	49.1	48.4	47.2	46.3	48.1	50.6	51.2	51.6	53.4	-0.533976
138	846	B	17	1	36	38	149.87	171.12	147.75	52.3	52.3	51.6	50	48.8	50.2	52.6	53.2	53.5	54.5	-0.159989
138	846	B	17	1	40	42	149.91	171.16	147.78	57.3	58.2	57.3	55.4	53.4	54.2	56.2	56.4	56.5	57	0.359681
138	846	B	17	1	44	46	149.95	171.2	147.81	51.8	52.2	51.3	49.9	48.4	49.7	52.2	52.6	52.9	53.7	-0.213262
138	846	B	17	1	48	50	149.99	171.24	147.839	53.4	53.7	52.9	51.4	50	51.3	53.5	53.9	53.8	55.1	-0.047391
138	846	B	17	1	52	54	150.03	171.28	147.869	53.8	55.1	54.3	52.7	50.9	52.2	54.3	54.7	54.9	54.8	-0.00638996
138	846	B	17	1	56	58	150.07	171.32	147.898	49.3	50.5	49.9	48.6	47.6	49.4	51.8	52.6	52.8	53.7	-0.475274
138	846	B	17	1	60	62	150.11	171.36	147.928	47.2	47.6	47.2	46.1	45.3	47.2	49.8	50.4	50.6	51.8	-0.694418
138	846	B	17	1	64	66	150.15	171.4	147.957	48.5	48.8	48.2	47.1	46.1	47.9	50.4	51	51.2	52.1	-0.559765
138	846	B	17	1	68	70	150.19	171.44	147.987	49.8	50.8	50.5	49.4	48.2	49.9	52.4	52.8	52.5	53.6	-0.425111
138	846	B	17	1	72	74	150.23	171.48	148.017	47.9	48.5	47.9	46.8	45.8	47.7	50.4	50.9	51.1	52.3	-0.623444
138	846	B	17	1	76	78	150.27	171.52	148.047	55.1	55.4	54.6	53.1	51.5	52.7	54.7	55.3	55.5	56.6	0.125153
138	846	B	17	1	80	82	150.31	171.56	148.077	52.3	53.5	52.8	51.6	50.6	52.5	54.9	55.6	56.1	57.2	-0.166832
138	846	B	17	1	84	86	150.35	171.6	148.108	53.4	53.8	53.3	52.3	51.3	53.1	55.5	56.2	56.5	57.3	-0.0529903
138	846	B	17	1	88	90	150.39	171.64	148.138	58.1	60	59.7	58.5	57.5	59	61.2	61.6	61.7	62.7	0.435462
138	846	B	17	1	92	94	150.43	171.68	148.169	55.4	55.9	55.5	54.7	54.1	56.1	58.4	59.1	59.6	61.3	0.153883
138	846	B	17	1	96	98	150.47	171.72	148.199	56.9	57.7	57.5	56.5	55.7	57.5	59.8	60.8	61	62.5	0.309347
138	846	B	17	1	100	102	150.51	171.76	148.23	57	58.1	57.7	56.4	55.2	56.5	58.6	59.2	59.1	60.3	0.319132
138	846	B	17	1	104	106	150.55	171.8	148.261	55.6	56.7	56.1	55.1	54.3	55.8	58.2	58.8	59.2	59.8	0.172827
138	846	B	17	1	108	110	150.59	171.84	148.292	51.3	51.6	51.4	50.6	50	52.3	55	55.5	56.6	57.7	-0.275245
138	846	B	17	1	112	114	150.63	171.88	148.323	55.8	56.6	56	54.6	53.4	54.8	57.1	57.9	58.1	58.8	0.192395
138	846	B	17	1	116	118	150.67	171.92	148.354	53.5	53.6	53	52	50.9	52.3	54.6	55.3	55.9	56.8	-0.0475606
138	846	B	17	1	120	122	150.71	171.96	148.386	57.8	58.2	57	55.2	53.3	54	55.9	56.4	56.2	56.8	0.399268
138	846	B	17	1	124	126	150.75	172	148.418	61.3	61.7	60.5	58.8	57.2	57.8	59.7	60.3	60.3	60.9	0.762849
138	846	B	17	2	1	3	151.02	172.27	148.63	60.7	61.1	60.5	59.5	58.6	60.1	62.2	62.8	63.1	64	0.696215
138	846	B	17	2	5	7	151.06	172.31	148.662	54.8	55.8	55.5	54.8	54.2	56.2	58.6	59.3	59.7	61	0.0816491
138	846	B	17	2	9	11	151.1	172.35	148.693	58.1	58.9	58.7	57.9	57.2	58.9	61.2	61.8	62.1	63.2	0.424419
138	846	B	17	2	13	15	151.14	172.39	148.725	54.4	55.2	55.1	54.2	53.6	55.5	57.9	58.7	59.1	60.2	0.0387812
138	846	B	17	2	17	19	151.18	172.43	148.757	51.9	53	52.9	52.2	51.7	53.9	56.4	57.2	57.9	58.8	-0.221986
138	846	B	17	2	21	23	151.22	172.47	148.788	58.3	59.1	58.7	57.8	56.9	58.6	60.7	61.4	61.7	62.9	0.443364
138	846	B	17	2	25	27	151.26	172.51	148.82	59.4	60.3	59.9	59.1	58.2	59.8	62	62.7	63	64.4	0.557206
138	846	B	17	2	29	31	151.3	172.55	148.851	61.5	62.8	62.6	61.5	60.5	61.9	63.9	64.3	64.4	65.2	0.775107
138	846	B	17	2	33	35	151.34	172.59	148.883	59.2	59.9	59.6	58.7	57.9	59.6	61.9	62.5	63	64.2	0.535151
138	846	B	17	2	37	39	151.38	172.63	148.915	59.5	60.1	59.5	58.5	57.7	59.2	61.3	61.8	62.2	63.2	0.565746
138	846	B	17	2	41	43	151.42	172.67	148.947	59.3	60	59.8	58.9	58.1	59.8	61.9	62.5	62.8	63.9	0.544312
138	846	B	17	2	45	47	151.46	172.71	148.978	53.7	55.2	55.2	54.7	54.2	56.4	58.9	59.4	59.8	61	-0.0390369
138	846	B	17	2	49	51	151.5	172.75	149.01	47.5	49.7	50.1	49.8	49.5	52.2	54.9	55.6	56	57.2	-0.68482
138	846	B	17	2	53	55	151.54	172.79	149.041	46	48.2	48.9	48.7	48.7	51.8	54.7	55.5	55.9	57	-0.84153
138	846	B	17	2	57	59	151.58	172.83	149.073	42.9	45.2	45.9	45.7	45.6	48.6	51.5	52.3	52.6	53.8	-1.16473
138	846	B	17	2	61	63	151.62	172.87	149.104	42.9	45.1	45.9	45.9	46.1	49.9	52.9	53.9	54.4	55.3	-1.16535
138	846	B	17	2	65	67	151.66	172.91	149.136	49.5	51.9	52.8	52.7	52.7	56.1	59	59.8	60.2	61.2	-0.479192
138	846	B	17	2	69	71	151.7	172.95	149.167	48.8	51.2	52.3	52.3	52.6	56	58.9	59.7	60	61.4	-0.552655
138	846	B	17	2	73	75	151.74	172.99	149.199	49.1	51.4	52.2	52.2	52.4	55.5	58.5	59.4	59.7	60.9	-0.522059
138	846	B	17	2	77	79	151.78	173.03	149.23	48.1	50.7	51.7	51.9	52.2	55.7	58.7	59.6	59.9	61.2	-0.62674
138	846	B	17	2	81	83	151.82	173.07	149.262	46.6	49	49.7	49.8	50.2	53.6	56.7	57.5	58.2	59.3	-0.783449
138	846	B	17	2	85	87	151.86	173.11	149.293	47.3	49.8	50.7	50.8	51	54.3	57.1	58	58.4	59.4	-0.71123
138	846	B	17	2	89	91	151.9	173.15	149.325	45.6	47.8	48.6	48.7	49	52.3	55.3	56.2	56.6	57.7	-0.888752
138	846	B	17	2	93	95	151.94	173.19	149.356	41.1	43.1	43.9	44	44.4	47.8	50.9	51.8	52.3	53.6	-1.35764
138	846	B	17	2	97	99	151.98	173.23	149.388	41.2	43.5	44.3	44.5	44.8	48.3	51.5	52.4	52.8	54.2	-1.34785
138	846	B	17	2	101	103	152.02	173.27	149.419	42	44.3	45.1	45.2	45.4	48.8	52	52.9	53.3	54.6	-1.26523
138	846	B	17	2	105	107	152.06	173.31	149.451	43.3	45.9	46.9	47.1	47.5	51.1	54.4	55.4	55.6	56.9	-1.13057
138	846	B	17	2	109	111	152.1	173.35	149.482	42	44.2	44.9	45	45.3	48.6	51.8	52.7	53	54.2	-1.26647
138	846	B	17	2	113	115	152.14	173.39	149.514	43.2	45	45.4	45.1	45.1	48.2	51.3	52.2	52.6	53.8	-1.14222
138	846	B	17	2	117	119	152.18	173.43	149.546	41.2	43.4	44.1	43.9	44.1	47.8	50.8	51.7	52	53.4	-1.35096
138	846	B	17	2	121	123	152.22	173.47	149.578	43.7	45.2	45.6	45.1	44.9	47.5	50.3	51.2	51.5	52.5	-1.09144
138	846	B	17	2	125	127	152.26	173.51	149.61	45.2	47.1	47.4	46.8	46.4	49	51.8	52.4	52.5	53.6	-0.935974
138	846	B	17	2	129	131	152.3	173.55	149.642	45.8	47.6	48	47.5	47.1	49.6	52.3	53.2	53.4	54.4	-0.874162
138	846	B	17	2	133	135	152.34	173.59	149.674	42.7	44.8	45.8	45.8	46	49.4	52.5	53.6	54.5	56.1	-1.19736
138	846	B	17	2	137	139	152.38	173.63	149.706	47.5	49.3	49.8	49.6	49.4	52.2	54.9	55.7	56.1	57.1	-0.698506
138	846	B	17	2	141	143	152.42	173.67	149.738	51.8	54.5	55.3	54.8	54.6	57	59.5	60.3	60.3	61.3	-0.251678
138	846	B	17	2	145	147	152.46	173.71	149.77	52.4	54.6	55.6	55.6	56.1	59	61.9	62.6	63.1	64	-0.189866
138	846	B	17	3	1	3	152.52	173.77	149.818	46.2	48.9	50.4	51	52	56	59.6	60.5	61.3	62	-0.83596
138	846	B	17	3	5	7	152.56	173.81	149.851	47	49.6	51	51.5	52.3	56.3	59.5	60.6	61.1	62.1	-0.753335
138	846	B	17	3	9	11	152.6	173.85	149.883	44	47	48.2	48.5	49.2	52.9	56.2	57	57.7	58.9	-1.06613
138	846	B	17	3	13	15	152.64	173.89	149.915	46.7	49.6	51.1	51.5	52.4	56.8	60.2	61.3	61.8	63	-0.785797
138	846	B	17	3	17	19	152.68	173.93	149.948	50.1	52.6	53.8	54.3	55.2	59.1	62.5	63.4	64	65.2	-0.432621
138	846	B	17	3	21	23	152.72	173.97	149.981	49	51.6	53	53.5	54.4	58.6	61.9	63.1	63.6	65.4	-0.547707
138	846	B	17	3	25	27	152.76	174.01	150.014	54.6	56.6	57.2	57.1	57.1	59.8	62.5	63.4	63.4	64.5	0.0343978
138	846	B	17	3	29	31	152.8	174.05	150.047	58.6	61	61.5	61.5	61.3	63.8	66.1	66.8	66.9	68.1	0.450009
138	846	B	17	3	33	35	152.84	174.09	150.079	61.4	62.7	62.9	62.5	62	64	66.2	66.9	66.9	67.3	0.740749
138	846	B	17	3	37	39	152.88	174.13	150.112	64.5	65.7	65.6	64.7	63.9	65.6	67.5	68.1	68.7	69.3	1.06271
138	846	B	17	3	41	43	152.92	174.17	150.146	62.9	64.6	64.9	64.3	63.7	65.8	67.9	68.6	69	70.3	0.895593
138	846	B	17	3	45	47	152.96	174.21	150.18	66.7	67.9	67.9	67.2	66.5	68.3	70.1	70.5	70.8	71.7	1.29039
138	846	B	17	3	49	51	153	174.25	150.214	70	71.5	70.9	69.5	67.8	68.5	70.1	70.2	69.9	70.5	1.63316
138	846	B	17	3	53	55	153.04	174.29	150.247	69.6	70.7	70.2	69	67.8	68.7	70.2	70.6	70.7	71.5	1.59092
138	846	B	17	3	57	59	153.08	174.33	150.281	67.1	68.1	67.9	66.6	65.5	66.6	68.3	68.8	68.9	69.8	1.33015
138	846	B	17	3	61	63	153.12	174.37	150.315	60.7	61.8	61.6	60.5	59.5	61	63	63.4	63.3	64.1	0.663554
138	846	B	17	3	65	67	153.16	174.41	150.349	66.8	67.8	67.1	65.7	64.3	65.2	66.9	67.2	67.3	68.3	1.29769
138	846	B	17	3	69	71	153.2	174.45	150.383	65	65.5	64.7	63.5	62.3	63.5	65.3	65.4	65.4	66.5	1.10976
138	846	B	17	3	73	75	153.24	174.49	150.417	61.5	62.8	62.5	61.5	60.4	61.9	63.7	64.2	64.2	64.6	0.744935
138	846	B	17	3	77	79	153.28	174.53	150.45	60.2	62.2	62.3	61.6	60.8	62.9	65.3	65.7	65.7	66.7	0.609036
138	846	B	17	3	81	83	153.32	174.57	150.484	51.9	53.9	54.4	53.8	53.3	55.6	58.1	58.7	59.1	60.3	-0.255269
138	846	B	17	3	85	87	153.36	174.61	150.517	51.5	53.1	53.4	52.7	52.2	54.5	56.6	57.1	57.4	58.5	-0.297515
138	846	B	17	3	89	91	153.4	174.65	150.55	48.7	50.5	50.8	50.4	50	52.5	55.2	55.6	55.8	56.2	-0.5895
138	846	B	17	3	93	95	153.44	174.69	150.583	48	50.1	50.2	50.1	49.8	52.4	55.2	55.8	56	56.6	-0.662964
138	846	B	17	3	97	99	153.48	174.73	150.616	45.4	47.7	48	47.8	47.4	50.4	53.1	53.8	53.8	55	-0.934137
138	846	B	17	3	101	103	153.52	174.77	150.648	38.8	40.7	41.2	40.8	40.5	43.5	46.4	47.3	47.3	48.5	-1.62154
138	846	B	17	3	105	107	153.56	174.81	150.681	35.8	38.2	39	38.7	38.8	42.1	45.3	46.2	46.2	47.4	-1.93434
138	846	B	17	3	109	111	153.6	174.85	150.714	34.6	36.4	36.8	36.3	35.7	38.8	41.9	42.5	42.7	44.1	-2.05983
138	846	B	17	3	113	115	153.64	174.89	150.746	37.2	38.3	38.4	37.8	37.2	39.9	42.9	43.5	43.8	45.3	-1.7899
138	846	B	17	3	117	119	153.68	174.93	150.778	39.5	41.1	41.4	40.9	40.4	43.1	45.9	46.6	46.8	47.7	-1.55119
138	846	B	17	3	121	123	153.72	174.97	150.81	45.2	47	47	46.1	45.3	47.4	50	50.6	50.6	51.4	-0.958682
138	846	B	17	3	125	127	153.76	175.01	150.843	47.5	49.3	49.2	48.3	47.4	49.4	51.8	52.5	52.7	53	-0.71997
138	846	B	17	3	129	131	153.8	175.05	150.875	49.8	51.5	51.7	50.9	50.5	52.6	55.2	55.7	56	57.1	-0.481258
138	846	B	17	3	133	135	153.84	175.09	150.907	54.4	56.9	56.9	56.5	56.4	58.8	61.5	62	62.6	63.2	-0.00321119
138	846	B	17	3	137	139	153.88	175.13	150.939	52.9	55.3	55.5	55	55	57.8	60.7	61.4	62.2	62.4	-0.159921
138	846	B	17	3	141	143	153.92	175.17	150.971	55.8	57.4	57.3	56.8	56.4	58.7	61.1	61.6	62	63.1	0.141225
138	846	B	17	3	145	147	153.96	175.21	151.004	53.1	55.1	55.3	54.8	54.5	56.7	59.2	60	60.3	61	-0.140353
138	846	B	17	4	1	3	154.02	175.27	151.052	54.6	55.9	55.9	55.5	55	57.2	59.6	60.3	60.7	61.8	0.0148002
138	846	B	17	4	5	7	154.06	175.31	151.084	57.2	59	58.8	57.8	56.8	58.3	60.5	60.9	60.9	61.8	0.28473
138	846	B	17	4	9	11	154.1	175.35	151.116	59	60.8	60.7	60	59	60.8	63	63.3	63.4	64.9	0.471413
138	846	B	17	4	13	15	154.14	175.39	151.149	54.7	56.2	56.2	55.5	54.7	56.7	59	59.5	59.5	61	0.0233401
138	846	B	17	4	17	19	154.18	175.43	151.181	48	48.8	48.8	48.3	48	50.4	53	54	54.4	55.9	-0.674473
138	846	B	17	4	21	23	154.22	175.47	151.213	45	46.1	46.6	46.7	47.1	50.5	53.6	54.7	55.6	56.8	-0.987269
138	846	B	17	4	25	27	154.26	175.51	151.245	50.1	52.5	53	52.8	53	55.9	58.7	59.4	59.7	60.8	-0.457194
138	846	B	17	4	29	31	154.3	175.55	151.278	53.3	55.9	56.2	55.8	55.6	57.9	60.4	61.1	61.1	62	-0.12483
138	846	B	17	4	33	35	154.34	175.59	151.31	49.8	52.1	52.5	52.2	52.3	55.1	57.9	58.7	59.2	60.4	-0.489657
138	846	B	17	4	37	39	154.38	175.63	151.343	48.2	49.4	49.4	48.9	48.6	51	53.7	54.6	55.3	56.5	-0.656772
138	846	B	17	4	41	43	154.42	175.67	151.375	48.1	49.7	50	49.5	49.2	51.6	54.3	55.1	55.6	56.5	-0.6678
138	846	B	17	4	45	47	154.46	175.71	151.408	45.1	46.7	47.5	47.5	47.7	51.1	54.3	55.2	55.9	57	-0.980596
138	846	B	17	4	49	51	154.5	175.75	151.44	48	49.6	49.9	49.4	49.1	51.5	54.3	55.1	55.4	56.6	-0.67945
138	846	B	17	4	53	55	154.54	175.79	151.473	49.9	51.7	51.7	50.9	50.2	52.3	54.7	55.3	55.5	56.3	-0.482361
138	846	B	17	4	57	59	154.58	175.83	151.505	51.2	52.6	52.4	51.6	50.8	52.7	55.1	55.7	56	57	-0.347707
138	846	B	17	4	61	63	154.62	175.87	151.537	52.2	53.6	53.5	52.8	52.2	54.3	56.7	57.4	57.8	59.1	-0.244271
138	846	B	17	4	65	67	154.66	175.91	151.569	57.3	58.8	58.7	58	57.3	59.4	61.7	62.4	62.7	63.7	0.285804
138	846	B	17	4	69	71	154.7	175.95	151.601	61.2	62.9	62.9	62.3	61.7	63.3	65.5	66	66.1	67	0.691009
138	846	B	17	4	73	75	154.74	175.99	151.634	61.3	62.8	62.7	61.8	61	62.7	64.7	65.4	65.5	66.3	0.700793
138	846	B	17	4	77	79	154.78	176.03	151.666	65.5	66.7	66.4	65.3	64.2	65.4	67.2	67.5	67.6	68.5	1.13722
138	846	B	17	4	81	83	154.82	176.07	151.698	66.9	68.2	67.9	67.1	66.1	67.4	69.2	69.7	69.9	71	1.28228
138	846	B	17	4	85	87	154.86	176.11	151.73	64.9	66.4	66.5	65.8	65.1	66.6	68.5	69	69.2	70.3	1.07354
138	846	B	17	4	89	91	154.9	176.15	151.762	63.7	64.8	64.5	63.8	63	64.5	66.4	66.9	67.3	68.2	0.948044
138	846	B	17	4	93	95	154.94	176.19	151.795	69	69.9	69.8	69.3	68.7	70.1	71.8	72.4	72.7	73.5	1.49893
138	846	B	17	4	97	99	154.98	176.23	151.827	71	72.3	72.1	71.3	70.4	71.5	73.1	73.5	73.6	74.4	1.70643
138	846	B	17	4	101	103	155.02	176.27	151.859	58.3	58.1	57.6	56.5	55.7	57.3	59.3	60.2	61.1	62.1	0.384263
138	846	B	17	4	105	107	155.06	176.31	151.892	63.4	64.2	63.7	63.1	62.8	64.5	66.5	67.4	67.8	68.7	0.914338
138	846	B	17	4	109	111	155.1	176.35	151.924	60.5	60.7	60.4	59.8	59.4	61	62.9	63.6	64	65.2	0.611948
138	846	B	17	4	113	115	155.14	176.39	151.956	59.3	59.9	59.5	59	58.8	60.8	62.9	63.6	64	65	0.486455
138	846	B	17	4	117	119	155.18	176.43	151.989	64.3	65.3	65.1	64.5	64	65.7	67.7	68.4	68.8	69.5	1.00612
138	846	B	17	4	121	123	155.22	176.47	152.021	66.1	66.9	66.4	65.4	64.1	64.8	66.6	67.3	67.2	67.9	1.19281
138	846	B	17	4	125	127	155.26	176.51	152.054	64.1	64.6	64.1	63.1	62.1	63.3	65	65.4	66.1	66.8	0.984068
138	846	B	17	4	129	131	155.3	176.55	152.086	62.4	63.3	62.5	61.4	60.1	61	62.8	63.4	63.3	63.7	0.806547
138	846	B	17	4	133	135	155.34	176.59	152.119	60	61.3	60.9	59.9	59.1	60.5	62.5	62.7	62.7	63.7	0.556185
138	846	B	17	4	137	139	155.38	176.63	152.152	53	53.9	53.7	53.2	52.9	55.4	57.9	58.6	59.4	60.9	-0.172845
138	846	B	17	4	141	143	155.42	176.67	152.184	52.6	53.5	53.2	52.6	52	53.9	56.4	56.9	57.5	58.1	-0.21509
138	846	B	17	5	1	3	155.52	176.77	152.27	55	54.9	54.2	53.4	52.7	54.7	56.9	58	58.6	60.6	0.0330946
138	846	B	17	5	5	7	155.56	176.81	152.307	56.7	57.8	57.5	56.6	55.8	57.6	59.9	60.3	60.8	61.1	0.209371
138	846	B	17	5	9	11	155.6	176.85	152.345	50	51.4	51.3	50.9	50.4	52.8	55.4	56.2	56.4	57.9	-0.488442
138	846	B	17	5	13	15	155.64	176.89	152.382	52.2	54.5	54.7	54.1	54	56.3	58.8	59.3	59.8	60.4	-0.260135
138	846	B	17	5	17	19	155.68	176.93	152.419	48.7	49.9	49.7	49.4	49.1	51.7	54.2	55.2	55.7	57.1	-0.624962
138	846	B	17	5	21	23	155.72	176.97	152.456	46.9	48.9	49.2	49	49.1	52	54.8	55.7	55.9	57.2	-0.812888
138	846	B	17	5	25	27	155.76	177.01	152.494	41.8	42.9	43	42.9	42.9	45.8	48.8	49.7	50.5	51.9	-1.34421
138	846	B	17	5	29	31	155.8	177.05	152.531	42.1	43.9	44.5	44.4	44.5	47.9	51	52	52.6	53.6	-1.31361
138	846	B	17	5	33	35	155.84	177.09	152.568	43.2	45.7	46	45.8	45.8	48.8	51.8	52.6	53	53.9	-1.19977
138	846	B	17	5	37	39	155.88	177.13	152.606	40	42.3	43.1	43.2	43.5	46.9	50.2	51.1	51.4	52.8	-1.53338
138	846	B	17	5	41	43	155.92	177.17	152.643	36.6	38.2	38.8	39.1	39.7	43.3	46.8	47.8	48.9	49.9	-1.8878
138	846	B	17	5	45	47	155.96	177.21	152.681	35.7	37.6	38.3	38.4	39.1	42.7	46.1	47.4	48.5	49.8	-1.98207
138	846	B	17	5	49	51	156	177.25	152.72	34.9	37.1	37.8	38.2	39.1	43.6	47.5	48.9	50.1	52.1	-2.06594
138	846	B	17	5	53	55	156.04	177.29	152.758	38.9	40.9	42	42.6	43.7	48.1	51.9	53.4	54.3	55.8	-1.65033
138	846	B	17	5	57	59	156.08	177.33	152.797	41	42.9	43.8	44.1	44.9	48.7	52.2	53.4	54.3	55.8	-1.43243
138	846	B	17	5	61	63	156.12	177.37	152.835	41.4	43.3	44.2	44.4	45.1	48.7	52.2	53.5	54.4	56	-1.39143
138	846	B	17	5	65	67	156.16	177.41	152.874	46.6	49.2	50	50.4	51	54.3	57.5	58.4	59	60	-0.850949
138	846	B	17	5	69	71	156.2	177.45	152.911	48.7	51.2	52	52.3	52.8	55.8	58.8	59.7	60.1	61.3	-0.633049
138	846	B	17	5	73	75	156.24	177.49	152.948	47.5	50	50.9	51.2	51.8	55.4	58.6	59.6	60.2	61.7	-0.758541
138	846	B	17	5	77	79	156.28	177.53	152.986	49.1	51.2	51.7	51.6	51.7	54.6	57.3	58.2	58.6	59.4	-0.59267
138	846	B	17	5	81	83	156.32	177.57	153.023	50.2	52.7	53.2	53	52.9	55.5	58.2	58.9	59.4	59.9	-0.478828
138	846	B	17	5	85	87	156.36	177.61	153.06	45.6	46.9	47.3	47.1	47.1	50	52.8	54	54.7	56.1	-0.958118
138	846	B	17	5	89	91	156.4	177.65	153.097	45.3	46.8	47.2	47.2	47.3	50.3	53.2	54.2	54.9	56.4	-0.989958
138	846	B	17	5	93	95	156.44	177.69	153.135	48.3	50.3	51	50.9	51	54	56.8	57.7	58.4	59.3	-0.678405
138	846	B	17	5	97	99	156.48	177.73	153.172	44.7	46.6	47.1	46.9	47	50.1	53.2	54.2	54.7	56.3	-1.05364
138	846	B	17	5	101	103	156.52	177.77	153.209	46.6	48.6	49.1	48.9	49	51.7	54.5	55.5	55.9	57.3	-0.856548
138	846	B	17	5	105	107	156.56	177.81	153.246	44.7	46.5	46.9	46.8	46.7	49.7	52.7	53.6	54.1	55.7	-1.05488
138	846	B	17	5	109	111	156.6	177.85	153.283	45.5	47.1	47.4	47.1	47	49.8	52.6	53.6	54.1	55.3	-0.972257
138	846	B	17	5	113	115	156.64	177.89	153.317	50.5	51.7	51.6	50.7	50	51.9	54.2	54.9	55.1	56.3	-0.452588
138	846	B	17	5	117	119	156.68	177.93	153.351	45.9	47.3	47.8	47.5	47.5	50.5	53.5	54.4	55.1	56.3	-0.931877
138	846	B	17	5	121	123	156.72	177.97	153.385	47.1	48.6	48.7	48.3	48	50.6	53.4	54.3	54.9	55.6	-0.80763
138	846	B	17	5	125	127	156.76	178.01	153.419	45.7	47.6	48.1	48	48	51.1	54.1	55.1	55.8	57	-0.953934
138	846	B	17	5	129	131	156.8	178.05	153.452	47	48.5	48.6	48.2	47.6	50	52.7	53.5	54	54.8	-0.81928
138	846	B	17	5	133	135	156.84	178.09	153.486	47.2	49.1	49.3	48.7	48.3	50.7	53.2	54.1	54.4	55.4	-0.799091
138	846	B	17	5	137	139	156.88	178.13	153.52	50.1	51.9	52.3	51.8	51.4	53.7	56.2	56.7	56.8	58	-0.497943
138	846	B	17	5	141	143	156.92	178.17	153.554	47.9	49.8	50.4	50.1	49.9	52.5	55.4	56.3	56.6	57.7	-0.727493
138	846	B	17	5	145	147	156.96	178.21	153.588	49	50.3	50.5	50.1	49.9	52.4	54.8	55.9	56.1	57.6	-0.613652
138	846	B	17	6	1	3	157.02	178.27	153.638	46.8	48.4	48.5	48.2	48.1	50.5	53.3	54.1	54.4	56	-0.843513
138	846	B	17	6	5	7	157.06	178.31	153.672	51.9	53.6	53.6	53.4	53.3	55.8	58.4	59.3	59.7	60.6	-0.313437
138	846	B	17	6	9	11	157.1	178.35	153.704	50.7	52.4	52.4	51.8	51.3	53.4	56	56.6	56.8	58.2	-0.43893
138	846	B	17	6	13	15	157.14	178.39	153.737	50.9	52.5	52.7	51.8	51.4	53.4	55.8	56.5	56.6	57.5	-0.418741
138	846	B	17	6	17	19	157.18	178.43	153.769	48.4	49.9	50.3	49.7	49.1	51.4	54.2	54.9	55.2	56	-0.679509
138	846	B	17	6	21	23	157.22	178.47	153.802	51.4	52.7	52.6	51.9	51.3	53.6	56	56.7	57.3	58.1	-0.367955
138	846	B	17	6	25	27	157.26	178.51	153.834	51.1	52.7	52.6	51.9	51.4	53.4	56.1	56.7	57	58.1	-0.399795
138	846	B	17	6	29	31	157.3	178.55	153.866	48.8	49.8	49.9	49.5	49.1	51.8	54.6	55.2	55.6	57.1	-0.639751
138	846	B	17	6	33	35	157.34	178.59	153.898	56.1	57.2	56.9	55.7	54.7	56.2	58.3	58.9	58.6	60.1	0.119252
138	846	B	17	6	37	39	157.38	178.63	153.93	55.1	55.5	55.5	54.5	54	55.7	58.1	58.7	59.1	60.1	0.014572
138	846	B	17	6	41	43	157.42	178.67	153.962	55.4	56.5	56	55.1	54	55.7	57.8	58.4	58.9	60.1	0.0451675
138	846	B	17	6	45	47	157.46	178.71	153.994	57.1	58.8	58.3	57	55.6	56.7	58.8	59.2	59.3	60	0.221444
138	846	B	17	6	49	51	157.5	178.75	154.026	53.7	54.2	53.5	52.4	51.5	53	55.2	56	56.5	57.6	-0.132976
138	846	B	17	6	53	55	157.54	178.79	154.057	47.6	47.1	46.5	45.8	45.3	47.5	50.1	50.9	51.8	53.1	-0.768354
138	846	B	17	6	57	59	157.58	178.83	154.089	56.3	58	58	57.1	56.4	58	60.3	60.9	61.1	62.3	0.13633
[truncated: 43 more rows]
