# Supplementary material for: A Revised Mid-Pliocene Composite Section for ODP Site 846
Source: Copernicus journal article supplement (doi:10.5194/cp-2019-133), 2020-02-21
Supplement: Supplementary file 7 [file Table S6 846C reflectance composite.xls]

## Sheet: Sheet1
TABLE S6: 846C REFLECTANCE COMPOSITE
Leg	Site	Hole	core		top (cm)	base (cm)	mbsf	mcd	log depth	Channel 1	Channel 2	Channel 3	Channel 4	Channel 5	Channel 6	Channel 7	Channel 8	Channel 9	Channel 10	Channel 1 normalized & detrended
138	846	C	9	4	137	139	84.38	95.66	81.5041	21.9	24.7	26.5	27.6	29.1	34.9	39.3	41.1	41.9	42.8	-1.5513
138	846	C	9	4	141	143	84.42	95.7	81.5353	27.9	31.1	32.8	33.5	34.6	39	42.6	43.5	43.6	43.9	-0.761716
138	846	C	9	4	145	147	84.46	95.74	81.5665	27.8	30.9	32.3	32.9	33.7	37.6	40.9	41.8	41.9	41.9	-0.775822
138	846	C	9	5	1	3	84.52	95.8	81.6131	25	27.7	28.9	29.3	30.2	34.6	38.2	39	39.5	40.1	-1.14613
138	846	C	9	5	5	7	84.56	95.84	81.6443	28.6	31.4	32.5	33	33.7	37.5	40.8	41.6	41.6	41.5	-0.672747
138	846	C	9	5	9	11	84.6	95.88	81.6754	25.5	28.5	29.6	30.2	31.1	35.6	39.3	40.1	40.7	40.4	-1.08211
138	846	C	9	5	13	15	84.64	95.92	81.7065	28.8	31.6	32.6	33	33.6	37.3	40.4	41	41	41.1	-0.648257
138	846	C	9	5	17	19	84.68	95.96	81.7376	36.1	38.3	38.8	38.7	38.7	41.4	43.8	44.2	44.1	43.8	0.312608
138	846	C	9	5	21	23	84.72	96	81.7688	35.8	38.9	39.8	39.6	39.9	43.2	45.9	46.3	45.9	45.8	0.272152
138	846	C	9	5	25	27	84.76	96.04	81.7999	29.9	32.7	33.7	34	34.5	38.5	41.7	42.5	42.3	42.3	-0.506121
138	846	C	9	5	29	31	84.8	96.08	81.831	42	43.6	44.1	43.7	43.4	45.8	48	48.5	48	47.7	1.08716
138	846	C	9	5	33	35	84.84	96.12	81.8622	44.8	46.9	47.3	46.9	46.5	48.8	51	51.3	51.3	51.1	1.45514
138	846	C	9	5	37	39	84.88	96.16	81.8933	44.4	46.5	46.7	46.1	45.7	47.9	50.1	50.3	50.1	50.2	1.4015
138	846	C	9	5	41	43	84.92	96.2	81.9244	41.8	43.9	44.6	44.4	44.4	47.4	49.9	50.5	50.6	50.6	1.05802
138	846	C	9	5	45	47	84.96	96.24	81.9555	45.9	48.3	48.7	48	47.4	49.2	51.4	51.7	51.2	50.7	1.59727
138	846	C	9	5	49	51	85	96.28	81.9867	48.4	51.4	51.9	51.4	51.1	52.9	55.1	55.2	54.4	54	1.92572
138	846	C	9	5	53	55	85.04	96.32	82.0178	47.1	49.8	50.1	49.5	48.8	50.4	52.3	52.3	51.5	51.1	1.75351
138	846	C	9	5	57	59	85.08	96.36	82.0489	41.5	43.6	44.1	43.7	43.5	45.6	48.1	48.5	48.1	48	1.01477
138	846	C	9	5	61	63	85.12	96.4	82.0801	43.3	45.6	45.9	45.4	44.8	46.8	49	49.2	48.8	48.8	1.25099
138	846	C	9	5	65	67	85.16	96.44	82.1127	41.1	43.9	44.6	44.4	44.4	46.9	49.4	49.8	49.3	48.9	0.960206
138	846	C	9	5	69	71	85.2	96.48	82.1453	39.4	41.7	42.5	42.3	42.2	44.8	47.4	47.8	47.4	47.2	0.735295
138	846	C	9	5	73	75	85.24	96.52	82.1779	40.7	43.5	44.5	44.6	44.8	47.6	50.2	50.6	50.3	50.5	0.905643
138	846	C	9	5	77	79	85.28	96.56	82.2106	38.2	40.7	41.7	41.7	41.9	45.1	47.8	48.5	48.7	48.7	0.57533
138	846	C	9	5	81	83	85.32	96.6	82.2432	33.7	36.8	38.3	38.9	40	44.3	47.7	48.7	49	49.4	-0.0184883
138	846	C	9	5	85	87	85.36	96.64	82.2758	31.9	34.7	36	36.6	37.5	41.6	44.9	45.8	45.8	45.9	-0.256574
138	846	C	9	5	89	91	85.4	96.68	82.3084	32.6	35.4	36.8	37.4	38.4	42.1	45.2	46	46.3	46.6	-0.165278
138	846	C	9	5	93	95	85.44	96.72	82.341	32.3	34.9	36.1	36.7	37.6	41	44.1	44.9	44.9	44.6	-0.205734
138	846	C	9	5	97	99	85.48	96.76	82.3736	31	33.7	35	35.7	36.6	40.6	43.8	44.6	44.9	45.1	-0.377944
138	846	C	9	5	101	103	85.52	96.8	82.4063	32.9	35.8	37.1	37.8	38.7	42.5	45.6	46.4	46.6	46.6	-0.128544
138	846	C	9	5	105	107	85.56	96.84	82.4388	32.1	34.6	35.9	36.4	37.3	41.2	44.3	45	45.1	45.1	-0.234877
138	846	C	9	5	109	111	85.6	96.88	82.4722	30	32.9	34.3	35.1	36.2	40.4	43.7	44.6	44.9	45	-0.512488
138	846	C	9	5	113	115	85.64	96.92	82.5094	29.8	32.8	34.2	35.1	36.5	40.8	44.2	45.2	45.4	45.6	-0.539769
138	846	C	9	5	117	119	85.68	96.96	82.5472	30.8	33.7	35.2	36.1	37.2	41.5	44.8	45.5	45.3	45.8	-0.408947
138	846	C	9	5	121	123	85.72	97	82.5852	26.5	29.5	31.3	32.3	33.7	38.9	42.8	43.8	44.3	44.8	-0.976415
138	846	C	9	5	125	127	85.76	97.04	82.6242	26.5	29.5	31.1	32.2	33.8	38.9	42.6	44	44.6	44.9	-0.977346
138	846	C	9	5	129	131	85.8	97.08	82.6631	24.5	27.3	29.1	30.2	31.8	37.7	42	43.7	44.7	45.6	-1.24178
138	846	C	9	5	133	135	85.84	97.12	82.7021	22.5	25.2	26.9	28.1	29.9	35.6	40	41.5	42.5	43	-1.50622
138	846	C	9	5	137	139	85.88	97.16	82.7414	22.7	25.3	26.9	28	29.6	35.1	39.3	40.7	41.3	41.9	-1.4808
138	846	C	9	5	141	143	85.92	97.2	82.7808	24.8	27.4	29.3	30.5	32.3	38.4	42.9	44.7	45.5	46	-1.20505
138	846	C	9	5	145	147	85.96	97.24	82.8201	25.1	27.8	29.5	30.8	32.7	38.7	43.3	45	45.5	45.9	-1.16645
138	846	C	9	6	1	3	86.02	97.3	82.8791	23.3	25.1	26.3	27.2	28.6	34.1	38.4	39.7	40.4	40.8	-1.405
138	846	C	9	6	5	7	86.06	97.34	82.9189	24.1	26.5	28.2	29.4	31	36.6	40.6	42	42.7	43.5	-1.30053
138	846	C	9	6	9	11	86.1	97.38	82.9588	24.5	27.1	28.5	29.6	31.1	36.6	40.7	42.2	42.8	43.1	-1.24876
138	846	C	9	6	13	15	86.14	97.42	82.9986	23.7	26.3	27.9	29	30.6	35.8	40	41	41.9	42.1	-1.35509
138	846	C	9	6	17	19	86.18	97.46	83.0384	23.9	26.3	27.8	28.8	30.3	35.6	39.8	41.1	41.6	42	-1.32967
138	846	C	9	6	21	23	86.22	97.5	83.0782	23.8	26	27.5	28.3	29.7	34.8	38.6	40	40.1	41	-1.34378
138	846	C	9	6	25	27	86.26	97.54	83.118	23.8	26.2	27.5	28.1	29.3	34.5	38.3	39.6	40.2	40.2	-1.34471
138	846	C	9	6	29	31	86.3	97.58	83.159	26.4	28.9	30.4	31.4	32.8	37.4	41.2	42.3	42.6	42.7	-1.00308
138	846	C	9	6	33	35	86.34	97.62	83.2001	26	28.7	30.2	31.1	32.2	36.5	40	40.9	41.1	41.2	-1.05672
138	846	C	9	6	37	39	86.38	97.66	83.2413	23.8	26.2	27.6	28.3	29.1	33.5	37	37.8	38	38.3	-1.3475
138	846	C	9	6	41	43	86.42	97.7	83.2824	23.1	25.7	27.3	28.1	29.1	33.6	37.3	38.3	38.7	39	-1.44066
138	846	C	9	6	45	47	86.46	97.74	83.3236	20.6	22.7	23.9	24.7	25.7	30.2	33.9	34.9	35.1	35.3	-1.77097
138	846	C	9	6	49	51	86.5	97.78	83.3647	21.4	23.6	24.9	25.7	26.9	31.8	35.7	36.8	37.1	37.4	-1.6665
138	846	C	9	6	53	55	86.54	97.82	83.4056	19	21.1	22.4	23.3	24.6	30.1	34.4	35.7	36.3	36.8	-1.98364
138	846	C	9	6	57	59	86.58	97.86	83.4462	20.4	22.6	24.1	25.1	26.6	32.3	36.7	38.2	39	39.7	-1.80012
138	846	C	9	6	61	63	86.62	97.9	83.4868	20.7	23	24.6	25.7	27.3	33	37.4	38.8	39.7	40	-1.76152
138	846	C	9	6	65	67	86.66	97.94	83.5275	21	23.4	24.9	26	27.6	33.3	37.7	39.1	40.1	40.9	-1.72293
138	846	C	9	6	69	71	86.7	97.98	83.5681	23.7	26.1	27.4	28.2	29.4	34.1	37.7	38.6	39.1	39.4	-1.36812
138	846	C	9	6	73	75	86.74	98.02	83.6083	24.8	27.6	29.1	29.7	30.6	35.3	39.1	40	40	39.9	-1.22413
138	846	C	9	6	77	79	86.78	98.06	83.6486	29.6	32.7	34.1	34.6	35.4	39.2	42.5	43.1	43.1	43.1	-0.592642
138	846	C	9	6	81	83	86.82	98.1	83.6888	31.4	34.5	35.9	36.4	37	40.7	43.9	44.5	44.2	44.2	-0.356418
138	846	C	9	6	85	87	86.86	98.14	83.729	32.5	35.5	36.6	37	37.5	40.9	44	44.5	44.5	44.5	-0.21242
138	846	C	9	6	89	91	86.9	98.18	83.7692	34.7	37.8	39	39.4	40	43.4	46.4	47	46.9	47.2	0.0765056
138	846	C	9	6	93	95	86.94	98.22	83.8148	33.4	36.7	38	38.5	39.1	43.4	46.7	47.5	47.6	47.8	-0.0957037
138	846	C	9	6	97	99	86.98	98.26	83.8566	39	42.1	43	43.1	43.4	46.4	49	49.3	49	48.7	0.641182
138	846	C	9	6	101	103	87.02	98.3	83.898	48.6	51.5	52.2	52.1	52.1	54.5	56.7	56.8	56.3	56	1.90508
138	846	C	9	6	105	107	87.06	98.34	83.9394	45.8	48.5	49	48.6	48.3	50.4	52.6	52.7	52.3	52.1	1.53524
138	846	C	9	6	109	111	87.1	98.38	83.9808	53.2	55.9	56.4	55.7	55.1	56.6	58.5	58.5	57.6	57	2.50928
138	846	C	9	6	113	115	87.14	98.42	84.0223	49.5	52	52.2	51.6	51	52.7	54.7	54.6	53.7	53.3	2.02086
138	846	C	9	6	117	119	87.18	98.46	84.0637	50.5	53.3	53.8	53.1	52.3	53.6	55.6	55.6	55.1	54	2.15169
138	846	C	9	6	121	123	87.22	98.5	84.1051	50.2	52.3	52.2	51.2	50.2	51.5	53.4	53.3	52.6	51.8	2.11123
138	846	C	9	6	125	127	87.26	98.54	84.1466	46.8	49.3	49.6	48.9	48.3	50.2	52.3	52.4	51.8	51.6	1.66234
138	846	C	9	6	129	131	87.3	98.58	87.3248	38.5	40.3	40.5	39.9	39.4	41.7	44.2	44.6	44.4	44.4	0.567861
138	846	C	10	1	46	48	88.47	102.12	87.3247	38.9	41.4	42	41.4	40.9	42.9	45.1	45.4	44.8	44.6	0.538203
138	846	C	10	1	50	52	88.51	102.16	87.3588	40.7	42.8	43	42.3	41.8	43.5	45.7	45.9	45.4	45.1	0.774428
138	846	C	10	1	54	56	88.55	102.2	87.3929	39.4	41.2	41.5	41	40.6	42.5	44.8	45.3	45	45.1	0.602218
138	846	C	10	1	58	60	88.59	102.24	87.4269	46.7	49.1	49.2	48.4	47.6	48.9	50.9	50.9	50.3	49.9	1.56308
138	846	C	10	1	62	64	88.63	102.28	87.461	42.4	44.7	45.1	44.7	44.2	46.2	48.4	48.7	48.3	47.9	0.995616
138	846	C	10	1	66	68	88.67	102.32	87.4959	47.8	50.8	51.7	51.5	51.3	53.2	55.4	55.6	55.1	55	1.70615
138	846	C	10	1	70	72	88.71	102.36	87.5299	45.9	48.5	49.2	49.1	49.2	51.3	53.6	53.9	53.5	53.2	1.45489
138	846	C	10	1	74	76	88.75	102.4	87.564	43.3	45	45	44.5	44.1	45.9	48.1	48.3	48	47.7	1.1114
138	846	C	10	1	78	80	88.79	102.44	87.598	42.9	45.7	46.5	46.3	46.2	48.4	50.7	50.7	49.9	49.7	1.05777
138	846	C	10	1	82	84	88.83	102.48	87.6329	38	40.7	41.7	41.7	41.8	44.5	47.1	47.5	47.3	46.9	0.41125
138	846	C	10	1	86	88	88.87	102.52	87.667	46.1	48.1	48.5	48	47.5	49.2	51.2	51.4	51	50.8	1.47752
138	846	C	10	1	90	92	88.91	102.56	87.701	50.9	52.7	52.8	52.2	51.6	53	54.8	55	54.6	54.6	2.109
138	846	C	10	1	94	96	88.95	102.6	87.7351	48.6	51	51.7	51.4	51.2	52.9	55	55.2	54.6	54.1	1.80504
138	846	C	10	1	98	100	88.99	102.64	87.77	39.5	42.2	43.2	43.2	43.2	45.9	48.4	48.8	48.8	48.7	0.605157
138	846	C	10	1	102	104	89.03	102.68	87.804	36.5	38.6	39.1	39	38.9	41.1	43.5	43.8	43.6	43.4	0.208968
138	846	C	10	1	106	108	89.07	102.72	87.839	36.5	39.3	39.9	39.7	39.7	41.8	44.1	44.2	43.9	43.4	0.208037
138	846	C	10	1	110	112	89.11	102.76	87.8739	35.2	37.9	38.8	39.1	39.4	41.9	44.6	45	44.7	44.6	0.0358276
138	846	C	10	2	1	3	89.52	103.17	88.2605	25.2	27.8	29.2	30	31	35	38.4	39.3	39.5	39.7	-1.29124
138	846	C	10	2	5	7	89.56	103.21	88.2978	25.3	28.3	29.9	30.8	31.9	36.2	39.6	40.5	40.5	40.5	-1.279
138	846	C	10	2	9	11	89.6	103.25	88.3361	27.6	30.4	31.9	32.7	33.7	38	41.5	42.2	42.4	42.3	-0.976894
138	846	C	10	2	13	15	89.64	103.29	88.3743	28.1	30.9	32.3	32.8	33.5	37	40.1	40.7	40.6	40.2	-0.911948
138	846	C	10	2	17	19	89.68	103.33	88.4116	26.7	29.4	30.8	31.4	32	35.6	38.7	39.4	39.6	39.8	-1.09733
138	846	C	10	2	21	23	89.72	103.37	88.4498	28	30.8	32.2	32.7	33.4	37.1	40.3	40.8	40.8	40.5	-0.926985
138	846	C	10	2	25	27	89.76	103.41	88.4879	27.6	30.4	31.8	32	32.3	35.7	38.7	39.1	39	38.9	-0.980617
138	846	C	10	2	29	31	89.8	103.45	88.5239	28.5	31.3	32.2	32.2	32.3	35.2	38.1	38.4	38.2	38.2	-0.86297
138	846	C	10	2	33	35	89.84	103.49	88.5576	31.4	34.1	35.3	35.2	35	37.7	40.4	40.7	40.3	40.1	-0.481817
138	846	C	10	2	37	39	89.88	103.53	88.5912	34.8	37.6	38.4	38.2	38.1	40.6	43	43.2	42.7	42.6	-0.0347877
138	846	C	10	2	41	43	89.92	103.57	88.6248	35.4	37.1	37.6	37.4	37.4	39.7	42.1	42.2	41.9	42.1	0.0433334
138	846	C	10	2	45	47	89.96	103.61	88.6584	43.1	45.7	46.1	45.8	45.3	47.1	49.3	49.4	49	48.8	1.0569
138	846	C	10	2	49	51	90	103.65	88.6929	38.3	40.6	41.3	41	40.8	43.2	45.6	46	45.7	45.8	0.423556
138	846	C	10	2	53	55	90.04	103.69	88.7253	46.7	49	49.2	48.3	47.1	48.3	50.2	50	49.2	48.8	1.52935
138	846	C	10	2	57	59	90.08	103.73	88.7576	44.6	47.3	47.8	47.3	46.6	48.2	50.3	50.4	49.5	49.1	1.25174
138	846	C	10	2	61	63	90.12	103.77	88.7908	45.8	48	47.8	46.7	45.8	47.1	49.1	49.2	48.6	48	1.40891
138	846	C	10	2	65	67	90.16	103.81	88.8247	40.2	41.7	41.4	40.6	39.8	41.5	43.5	43.7	43.1	42.8	0.670164
138	846	C	10	2	69	71	90.2	103.85	88.8571	38.9	40.8	40.9	40.2	39.6	41.4	43.6	43.8	43.5	43.1	0.497954
138	846	C	10	2	73	75	90.24	103.89	88.8895	41	43	43.2	42.5	41.8	43.5	45.7	45.9	45.6	45.3	0.773705
138	846	C	10	2	77	79	90.28	103.93	88.9217	44.3	46.3	46.3	45.4	44.5	45.9	47.9	48	47.4	47	1.20756
138	846	C	10	2	81	83	90.32	103.97	88.9519	45.4	48	48.2	47.4	46.6	48.2	50.1	50.3	49.6	48.8	1.35156
138	846	C	10	2	85	87	90.36	104.01	88.9828	45.8	47.9	48.1	47.2	46.3	47.7	49.7	49.8	49.2	48.8	1.40333
138	846	C	10	2	89	91	90.4	104.05	89.0129	46.9	48.9	48.8	47.8	46.8	48.2	50.1	50.2	49.7	49.3	1.54732
138	846	C	10	2	93	95	90.44	104.09	89.0431	42.2	44.1	44.2	43.5	42.7	44.5	46.5	46.7	46.4	46	0.927155
138	846	C	10	2	97	99	90.48	104.13	89.0713	44.2	46	46.2	45.6	45.1	47	49.1	49.4	49	48.8	1.18973
138	846	C	10	2	101	103	90.52	104.17	89.0984	46.7	48.6	48.8	48	47.2	48.8	50.6	50.8	50.3	50	1.51818
138	846	C	10	2	105	107	90.56	104.21	89.1256	49.9	51.4	51.3	50.5	49.5	50.7	52.4	52.4	51.9	51.7	1.93886
138	846	C	10	2	109	111	90.6	104.25	89.1527	49.8	52.2	52.5	51.6	50.7	51.9	53.6	53.7	53.2	52.8	1.92475
138	846	C	10	2	113	115	90.64	104.29	89.1805	50.3	52	51.9	51	50.3	51.7	53.3	53.3	52.8	52.5	1.9897
138	846	C	10	2	117	119	90.68	104.33	89.2077	52.9	54.1	54	53.1	52.2	53.4	55.1	55.1	54.6	54.3	2.33133
138	846	C	10	2	121	123	90.72	104.37	89.2348	44.6	46.3	46.4	45.7	45.1	46.6	48.6	48.9	48.6	48.5	1.23685
138	846	C	10	2	125	127	90.76	104.41	89.2613	48.4	50.7	50.8	50	49.1	50.3	52.1	52.2	51.3	50.6	1.73658
138	846	C	10	2	129	131	90.8	104.45	89.2879	46.9	49.3	49.7	49	48.2	49.7	51.6	51.6	51.1	50.9	1.53802
138	846	C	10	2	133	135	90.84	104.49	89.3138	42.4	44.5	44.7	43.9	43.2	44.9	47	47.2	46.9	46.5	0.9442
138	846	C	10	2	137	139	90.88	104.53	89.3396	40.4	42.2	42.5	41.9	41.4	43.4	45.6	45.8	45.3	45	0.679763
138	846	C	10	2	141	143	90.92	104.57	89.3655	41.9	44.3	44.6	43.9	43.3	45.1	47.2	47.2	46.7	46.3	0.876462
138	846	C	10	2	145	147	90.96	104.61	89.3914	42	44.5	44.7	44.1	43.3	44.9	46.8	46.7	46.1	45.5	0.888707
138	846	C	10	3	1	3	91.02	104.67	89.4306	44.7	47.2	47.5	46.9	46.2	47.8	49.8	49.9	49.2	48.8	1.24304
138	846	C	10	3	5	7	91.06	104.71	89.4565	42.7	44.8	45.2	44.6	43.8	45.7	47.8	48	47.5	47.3	0.978607
138	846	C	10	3	9	11	91.1	104.75	89.483	46.5	49.1	49.4	48.5	47.6	49.2	51.1	51.1	50.3	49.6	1.47834
138	846	C	10	3	13	15	91.14	104.79	89.5089	42.4	44.8	45.1	44.3	43.5	45.2	47.2	47.1	46.4	46.1	0.93722
138	846	C	10	3	17	19	91.18	104.83	89.5348	38.3	40.8	41.2	40.4	39.7	41.8	44.2	44.4	43.9	43.6	0.396103
138	846	C	10	3	21	23	91.22	104.87	89.56	37.5	39.9	40.4	39.7	39.1	41.1	43.3	43.4	42.7	42.3	0.28977
138	846	C	10	3	25	27	91.26	104.91	89.5859	42.4	44.6	44.7	43.9	43	44.6	46.7	46.8	46.3	46	0.934428
138	846	C	10	3	29	31	91.3	104.95	89.6112	43.8	46.2	46.5	45.7	44.8	46.4	48.4	48.4	47.7	47.3	1.11795
138	846	C	10	3	33	35	91.34	104.99	89.6371	41.5	43.8	44	43.2	42.3	43.9	45.9	45.9	45.1	44.6	0.81399
138	846	C	10	3	37	39	91.38	105.03	89.6623	43.4	45.7	46.1	45.5	44.9	46.7	48.7	48.8	48.1	47.9	1.06339
138	846	C	10	3	41	43	91.42	105.07	89.6882	46	48.4	48.8	48.4	48	49.8	51.9	51.9	51.4	50.9	1.40502
138	846	C	10	3	45	47	91.46	105.11	89.7141	44.7	47.5	48.2	47.9	47.6	49.9	52	52.1	51.4	51.1	1.23281
138	846	C	10	3	49	51	91.5	105.15	89.7394	53.8	56.3	56.8	56.2	55.4	56.6	58.2	58	57.1	56.6	2.43083
138	846	C	10	3	53	55	91.54	105.19	89.7653	48.1	50.9	51.6	51.2	50.6	52.6	54.5	54.5	53.7	53.4	1.67891
138	846	C	10	3	57	59	91.58	105.23	89.7905	54.8	57.4	58	57.6	57.1	58.6	60.3	60.2	59.5	58.9	2.56072
138	846	C	10	3	61	63	91.62	105.27	89.8164	51.7	54.2	55	54.8	54.7	57.1	59.1	59.4	59.1	59	2.15135
138	846	C	10	3	65	67	91.66	105.31	89.8417	55.1	58	58.8	58.8	58.8	61.1	63.1	63.3	62.7	62.4	2.59838
138	846	C	10	3	69	71	91.7	105.35	89.8676	54.3	57.3	58	57.8	57.5	59.2	60.9	60.8	60.2	59.5	2.49205
138	846	C	10	3	73	75	91.74	105.39	89.8928	60.2	63.2	64.1	63.9	63.8	65.6	67.1	67.2	66.4	66	3.26846
138	846	C	10	3	77	79	91.78	105.43	89.9187	54.2	56.9	57.9	58	58.1	60.4	62.4	62.7	62.3	62.1	2.47701
138	846	C	10	3	81	83	91.82	105.47	89.944	55.1	58.1	59.2	59.3	59.6	62	63.9	64.2	63.7	63.2	2.59466
138	846	C	10	3	85	87	91.86	105.51	89.9699	50.6	54	55.5	56.1	56.7	59.8	62.2	62.5	62.3	61.8	2.00084
138	846	C	10	3	89	91	91.9	105.55	89.9963	49.5	52.5	53.4	53.8	54.2	56.7	58.9	59.2	58.8	58.7	1.85498
138	846	C	10	3	93	95	91.94	105.59	90.024	47.6	50.7	52	52.5	53	55.7	58	58.4	58.2	58	1.60372
138	846	C	10	3	97	99	91.98	105.63	90.0521	45.6	48.9	50.3	50.9	51.6	55.1	57.7	58.4	58.2	58.1	1.33929
138	846	C	10	3	101	103	92.02	105.67	90.0817	45.7	49.2	50.6	51.3	52.1	55.2	57.6	58.1	57.8	57.5	1.35153
138	846	C	10	3	105	107	92.06	105.71	90.1113	42.6	46.1	47.8	48.6	49.7	53.3	56	56.6	56.6	56.2	0.942167
138	846	C	10	3	109	111	92.1	105.75	90.1428	37.7	41.4	43.2	44.2	45.4	49.4	52.4	53.1	53.1	52.8	0.295647
138	846	C	10	3	113	115	92.14	105.79	90.1752	43.3	47.1	48.8	49.3	49.9	53.4	56	56.6	56.4	56.2	1.03253
138	846	C	10	3	117	119	92.18	105.83	90.2067	44	47.7	49.3	50	50.7	53.7	56.1	56.4	56	55.9	1.12383
138	846	C	10	3	121	123	92.22	105.87	90.2391	43	46.4	47.7	48.2	48.8	51.8	54.2	54.6	54.5	54.3	0.991146
138	846	C	10	3	125	127	92.26	105.91	90.2715	42.5	45.1	46.3	46.9	47.5	50.1	52.4	52.6	52.1	51.9	0.924338
138	846	C	10	3	129	131	92.3	105.95	90.3047	42.9	45.9	47.2	47.9	48.6	51.3	53.7	54.1	53.9	53.4	0.976109
138	846	C	10	3	133	135	92.34	105.99	90.3372	39.9	43.3	45.1	46	47.1	50.6	53.4	53.8	53.9	53.6	0.57992
138	846	C	10	3	137	139	92.38	106.03	90.3705	33.7	36.8	38.4	39.4	40.6	44.5	47.5	48.2	48.4	48.1	-0.237879
138	846	C	10	3	141	143	92.42	106.07	90.403	28.1	31.2	32.8	34	35.3	40.1	43.4	44.6	44.6	44.8	-0.976626
138	846	C	10	3	145	147	92.46	106.11	90.4395	27.3	30.8	32.5	33.9	35.5	40.8	44.6	46.1	46.1	46.8	-1.08296
138	846	C	10	4	1	3	92.52	106.17	90.5014	28	31	32.9	34	35.6	40.2	43.6	44.8	45	45.4	-0.992127
138	846	C	10	4	5	7	92.56	106.21	90.542	28.4	32	33.9	35.1	36.7	41.7	45.2	46.4	46.6	47.3	-0.940357
138	846	C	10	4	9	11	92.6	106.25	90.5836	27.7	30.9	32.9	34.3	35.8	41.5	45.5	46.8	47.3	48.1	-1.03351
138	846	C	10	4	13	15	92.64	106.29	90.6266	24.9	28	29.8	31.1	32.7	38.1	42.1	43.3	44.2	44.3	-1.40335
138	846	C	10	4	17	19	92.68	106.33	90.6728	25.6	29	31	32.3	33.9	39.4	43.2	44.5	45.2	45.4	-1.31206
138	846	C	10	4	21	23	92.72	106.37	90.7208	22.7	25.7	27.4	28.7	30.3	35.9	39.9	41.4	41.9	42.6	-1.69507
138	846	C	10	4	25	27	92.76	106.41	90.7737	22.2	24.9	26.8	28.2	30	36.1	40.6	42.3	43.3	44	-1.76188
138	846	C	10	4	29	31	92.8	106.45	90.8252	23.8	26.7	28.5	29.9	31.7	37.2	41.3	42.8	43.5	44	-1.552
138	846	C	10	4	33	35	92.84	106.49	90.8781	23	25.9	27.8	29	30.7	36.4	40.6	42.2	43	43.7	-1.65834
138	846	C	10	4	37	39	92.88	106.53	90.9296	23.4	26.4	28.1	29.3	31	36.6	40.6	42	42.8	43.4	-1.60657
138	846	C	10	4	41	43	92.92	106.57	90.9824	22.8	25.8	27.7	28.8	30.5	36.6	41.1	42.7	43.8	44.4	-1.68655
138	846	C	10	4	45	47	92.96	106.61	91.034	24.6	28.1	30	31.5	33.2	39	43.2	44.8	45.4	45.7	-1.45032
138	846	C	10	4	49	51	93	106.65	91.0868	27.6	30.7	32.6	34	35.6	40.7	44.5	45.5	46.3	46.4	-1.056
138	846	C	10	4	53	55	93.04	106.69	91.1397	23.9	26.8	28.6	29.9	31.6	38.1	42.8	44.8	45.9	46.4	-1.54441
138	846	C	10	4	57	59	93.08	106.73	91.1912	28.4	31.4	33.1	34.4	36.1	41	44.7	45.8	46.3	46.7	-0.952455
138	846	C	10	4	61	63	93.12	106.77	91.2428	29.1	32.6	34.6	36	37.7	42.9	46.8	48.2	48.9	49	-0.861158
138	846	C	10	4	65	67	93.16	106.81	91.293	30	33.4	35.5	36.9	38.5	43.5	47.3	48.7	49	49.3	-0.743511
138	846	C	10	4	69	71	93.2	106.85	91.3433	30.1	33.4	35.3	36.6	38.3	43.6	47.4	48.7	49	48.9	-0.731267
138	846	C	10	4	73	75	93.24	106.89	91.3949	30.1	33.6	35.5	36.8	38.6	43.8	47.5	48.6	48.8	48.9	-0.732197
138	846	C	10	4	77	79	93.28	106.93	91.4451	29.6	32.8	34.8	35.9	37.5	42.4	45.8	47	47.2	47.3	-0.799004
138	846	C	10	4	81	83	93.32	106.97	91.4901	30.9	34.1	35.8	36.9	38.4	43	46.5	47.6	48	47.9	-0.628656
138	846	C	10	4	85	87	93.36	107.01	91.5341	32.3	35.9	37.9	39.3	41	45.8	49.2	50.2	50.6	50.9	-0.445133
138	846	C	10	4	89	91	93.4	107.05	91.5769	29.7	33.1	35	36.3	37.9	42.7	46.3	47.3	47.9	48.5	-0.788621
138	846	C	10	4	93	95	93.44	107.09	91.6202	29.2	32.3	34.3	35.6	37.3	42.6	46.4	47.7	48.3	48.6	-0.855428
138	846	C	10	4	97	99	93.48	107.13	91.6624	27.7	30.9	32.6	33.6	35.3	40.3	44	45.1	45.6	45.7	-1.05399
138	846	C	10	4	101	103	93.52	107.17	91.7064	27.6	30.8	32.6	33.8	35.5	40.7	44.7	46	46.6	46.9	-1.06809
138	846	C	10	4	105	107	93.56	107.21	91.7504	22.9	24.5	25.2	25.6	26.3	30.1	33.3	34.1	34.1	34.1	-1.68826
138	846	C	10	4	109	111	93.6	107.25	91.8012	29.3	32.2	33.7	34.6	35.8	40.1	43.4	44.4	44.7	45.1	-0.845975
138	846	C	10	4	113	115	93.64	107.29	91.8514	31.5	35.2	37.1	38.2	39.8	44.2	47.7	48.7	49	49	-0.557049
138	846	C	10	4	117	119	93.68	107.33	91.9017	31.2	34.6	36.4	37.6	39	43.5	46.9	47.9	48.3	48.3	-0.597506
138	846	C	10	4	121	123	93.72	107.37	91.952	29.8	33.3	35.4	36.5	38	43.6	47.5	48.9	49.5	50.1	-0.78289
138	846	C	10	4	125	127	93.76	107.41	92.0022	29.8	33	34.7	36.1	37.8	42.8	46.4	47.7	48.2	48.6	-0.783821
138	846	C	10	4	129	131	93.8	107.45	92.0538	28.3	31.2	33.2	34.2	35.6	40.5	44.1	45	45.7	46.1	-0.982381
138	846	C	10	4	133	135	93.84	107.49	92.104	31.8	35.3	37	37.8	39	43.1	46.3	47.2	47	47.2	-0.522176
138	846	C	10	4	137	139	93.88	107.53	92.1543	34.3	37.6	39.2	40	40.9	44.6	47.7	48.6	48.2	47.8	-0.193725
138	846	C	10	4	141	143	93.92	107.57	92.2045	36.1	39.3	40.6	41.2	42	45.5	48.4	49	48.6	48.4	0.0424998
138	846	C	10	4	145	147	93.96	107.61	92.2561	35.2	38.7	40.2	40.9	41.6	45.5	48.6	49	49	49.3	-0.0770084
138	846	C	10	5	1	3	94.02	107.67	92.3308	36.8	40.1	41.4	41.7	42.3	45.4	48.1	48.7	48.4	48.2	0.1324
138	846	C	10	5	5	7	94.06	107.71	92.3824	38.8	42	43.2	43.4	43.8	46.7	49.3	49.6	49.4	49	0.394975
138	846	C	10	5	9	11	94.1	107.75	92.4327	38.6	41.6	42.5	42.7	42.9	45.8	48.2	48.6	48.2	47.9	0.367694
138	846	C	10	5	13	15	94.14	107.79	92.4829	37.3	40.3	41.3	41.4	41.8	44.5	47	47.5	47	47	0.195485
138	846	C	10	5	17	19	94.18	107.83	92.5318	38.5	41.8	43.1	43.3	43.4	46.4	49.1	49.4	49	48.7	0.352658
138	846	C	10	5	21	23	94.22	107.87	92.5799	36.7	39.6	40.6	40.8	41	44	46.7	47	46.9	47	0.114572
138	846	C	10	5	25	27	94.26	107.91	92.6243	40	43	44	44.1	44.2	46.8	49.2	49.4	48.9	48.3	0.548426
138	846	C	10	5	29	31	94.3	107.95	92.6683	37.6	39.9	40.8	40.9	41.1	43.9	46.4	46.9	46.8	47	0.231288
138	846	C	10	5	33	35	94.34	107.99	92.7111	41.2	43.8	44.6	44.7	45	47.5	50	50.4	49.9	49.7	0.704668
138	846	C	10	5	37	39	94.38	108.03	92.7533	39.8	43.1	44.4	44.7	45.5	49.1	52.1	52.8	52.7	52.7	0.519284
138	846	C	10	5	41	43	94.42	108.07	92.7965	43.9	46.3	46.8	46.7	46.9	49.2	51.6	51.9	51.6	51.6	1.05854
138	846	C	10	5	45	47	94.46	108.11	92.8376	44.9	47.9	48.8	48.7	48.7	51	53.2	53.5	53	52.6	1.18936
138	846	C	10	5	49	51	94.5	108.15	92.8786	47.2	50.6	51.3	51.2	51.1	53.1	55.2	55.3	54.6	54.4	1.49146
138	846	C	10	5	53	55	94.54	108.19	92.9197	48.2	50.9	51.5	51.4	51.4	53.2	55.4	55.4	55	54.5	1.62229
138	846	C	10	5	57	59	94.58	108.23	92.9606	46.4	49.2	49.9	49.9	50.2	52.4	54.5	54.9	54.4	54	1.3842
138	846	C	10	5	61	63	94.62	108.27	93.0001	43.1	45.9	46.8	46.7	46.7	49.3	51.6	51.8	51.4	51.1	0.948484
138	846	C	10	5	65	67	94.66	108.31	93.0397	44.3	47.2	47.9	47.7	47.9	50.5	52.9	53.2	53.2	53.3	1.10566
138	846	C	10	5	69	71	94.7	108.35	93.0793	43.8	46.9	47.5	47.3	47.4	49.6	51.9	52.1	51.8	51.8	1.03885
138	846	C	10	5	73	75	94.74	108.39	93.1154	42.9	45.8	46.5	46.5	46.7	49.2	51.5	51.7	51.2	50.8	0.919342
138	846	C	10	5	77	79	94.78	108.43	93.1512	42.5	45.6	46.4	46.3	46.4	48.9	51.4	51.8	51.6	51.3	0.86571
138	846	C	10	5	81	83	94.82	108.47	93.1859	46	48.7	49.4	49.2	49	51.1	53.4	53.5	52.8	52.3	1.32591
138	846	C	10	5	85	87	94.86	108.51	93.2216	46.1	48.7	49.4	49.2	49	51	53	53	52.6	52.5	1.33816
138	846	C	10	5	89	91	94.9	108.55	93.2563	42.3	44.4	44.6	44.3	44.1	46.5	48.9	49.5	49.6	49.8	0.836568
138	846	C	10	5	93	95	94.94	108.59	93.2921	46.5	48.6	49.1	48.8	48.6	50.7	52.8	53.1	52.7	52.3	1.389
138	846	C	10	5	97	99	94.98	108.63	93.3248	40.9	43.3	43.8	43.3	43	45.4	47.7	48.1	48	47.6	0.650253
138	846	C	10	5	101	103	95.02	108.67	93.3544	45.1	48.1	48.8	48.4	47.9	49.8	51.9	52	51.3	50.7	1.20268
138	846	C	10	5	105	107	95.06	108.71	93.3839	48.6	51.3	51.8	51.5	51	52.6	54.6	54.6	54	53.6	1.66289
138	846	C	10	5	109	111	95.1	108.75	93.4126	45.7	48.7	49.6	49.6	50	52.9	55.3	55.8	55.3	54.9	1.27987
138	846	C	10	5	113	115	95.14	108.79	93.4421	48.4	50.9	51.3	50.8	50.5	52.3	54.3	54.5	54	53.5	1.63468
138	846	C	10	5	117	119	95.18	108.83	93.4708	44.1	46.1	46.6	46.6	46.8	49	51.4	51.8	51.5	51.2	1.06721
138	846	C	10	5	121	123	95.22	108.87	93.5003	43	46.3	47.4	47.6	48.2	51.1	53.7	54.2	54.1	53.8	0.92135
138	846	C	10	5	125	127	95.26	108.91	93.5287	40.1	42.7	43.6	43.6	43.9	46.6	49.1	49.5	49.4	49.2	0.538336
138	846	C	10	5	129	131	95.3	108.95	93.5576	34.9	37.8	39	39.4	40	43.8	46.8	47.8	48.1	48.5	-0.14771
138	846	C	10	5	133	135	95.34	108.99	93.5856	34.9	37.6	38.7	39.1	39.8	43.3	46.4	47.2	47.2	47.5	-0.14864
138	846	C	10	5	137	139	95.38	109.03	93.6145	29.1	31.2	32.3	32.6	33.4	37.4	40.8	42	42.6	43.4	-0.913738
138	846	C	10	5	141	143	95.42	109.07	93.6434	38.8	41.1	41.8	41.9	42.2	45.1	47.9	48.4	48.3	48	0.363335
138	846	C	10	5	145	147	95.46	109.11	93.6714	43.5	46.2	46.6	46	45.3	46.9	49	49.1	48.5	48	0.981643
138	846	C	10	6	1	3	95.52	109.17	93.7147	39.9	42.6	43	42.5	42	43.8	46.1	46.3	45.7	45.5	0.505937
138	846	C	10	6	5	7	95.56	109.21	93.7428	43.7	46.7	47.1	46.5	45.9	47.5	49.7	49.8	49.2	48.7	1.00567
138	846	C	10	6	9	11	95.6	109.25	93.7717	42.2	44.7	45	44.5	44.1	46	48.3	48.5	47.8	47.6	0.807107
138	846	C	10	6	13	15	95.64	109.29	93.7997	42.3	45.1	45.9	46	46.1	48.7	51.1	51.5	51.2	50.7	0.819352
138	846	C	10	6	17	19	95.68	109.33	93.8286	47.6	50.4	50.9	50.2	49.7	51.4	53.4	53.5	52.6	51.9	1.51671
138	846	C	10	6	21	23	95.72	109.37	93.8567	44.4	46.5	46.5	45.6	44.9	46.4	48.4	48.3	47.6	47	1.09417
138	846	C	10	6	25	27	95.76	109.41	93.8855	44.1	45.9	46.1	45.5	45	46.6	48.8	48.8	48.2	48	1.05372
138	846	C	10	6	29	31	95.8	109.45	93.9136	48.7	51.6	51.8	50.9	49.8	51.1	52.9	52.7	51.8	51.8	1.65885
138	846	C	10	6	33	35	95.84	109.49	93.9425	51.6	54.3	54.5	53.5	52.5	53.8	55.5	55.5	54.7	54.3	2.04
138	846	C	10	6	37	39	95.88	109.53	93.9714	49.1	50.8	50.7	50	49.4	50.8	52.7	52.8	52.3	51.8	1.70969
138	846	C	10	6	41	43	95.92	109.57	93.9998	46.5	49.1	49.4	48.7	48.1	49.7	51.8	52	51.5	50.7	1.3662
138	846	C	10	6	45	47	95.96	109.61	94.0307	52.3	55	55	53.7	52.3	53.1	54.7	54.3	53.3	52.5	2.12944
138	846	C	10	6	49	51	96	109.65	94.0615	49.1	50.8	50.7	49.9	48.9	50.2	52	52	51.4	50.9	1.7069
138	846	C	10	6	53	55	96.04	109.69	94.0924	47.9	50.1	50.2	49.3	48.6	50.1	52.1	52.2	51.7	51.3	1.54786
138	846	C	10	6	57	59	96.08	109.73	94.1232	47.3	49.8	50	49	47.9	49.5	51.3	51.4	51	50.5	1.46788
138	846	C	10	6	61	63	96.12	109.77	94.1542	51.3	54	53.9	52.6	51.3	52.2	53.8	53.7	52.9	52.1	1.99396
138	846	C	10	6	65	67	96.16	109.81	94.1854	47.8	50.9	51.4	50.6	50	51.5	53.4	53.4	52.9	52.3	1.53189
138	846	C	10	6	69	71	96.2	109.85	94.2166	51.1	53	53	52.1	51.3	52.5	54.2	54.2	53.5	52.8	1.96575
138	846	C	10	6	73	75	96.24	109.89	94.2477	50.7	53.3	53.7	53.1	52.5	54	55.6	55.6	54.9	54.6	1.91212
138	846	C	10	6	77	79	96.28	109.93	94.2789	45.3	47.8	48.4	48.1	47.9	50.2	52.4	52.7	52.4	52.3	1.19972
138	846	C	10	6	81	83	96.32	109.97	94.3101	50.6	53.1	53.5	52.8	52.2	53.7	55.5	55.6	55.1	54.6	1.89708
138	846	C	10	6	85	87	96.36	110.01	94.3427	47.2	50	50.4	49.8	49.3	50.9	52.7	52.7	51.9	51.1	1.44819
138	846	C	10	6	89	91	96.4	110.05	94.377	47.9	50.3	50.7	50.1	49.5	51	52.8	52.9	52.2	51.7	1.53949
138	846	C	10	6	93	95	96.44	110.09	94.4113	44.3	47.1	47.7	47.4	47	49.1	51.2	51.4	50.8	50.4	1.06425
138	846	C	10	6	97	99	96.48	110.13	94.4456	51.3	53.3	53.4	52.7	52	53.2	54.9	54.7	54.1	53.4	1.98558
138	846	C	10	6	101	103	96.52	110.17	94.4798	43.3	45.8	46.6	46.4	46.4	49	51.4	51.9	51.7	51.4	0.930631
138	846	C	10	6	105	107	96.56	110.21	94.5132	49.6	51.8	52.2	51.7	51.2	53.1	55	55.3	54.9	54.8	1.75974
138	846	C	10	6	109	111	96.6	110.25	94.5484	50.5	52.3	52.4	51.8	51.1	52.8	54.8	54.9	54.2	53.8	1.87739
138	846	C	10	6	113	115	96.64	110.29	94.5845	53.3	56	56.3	55.5	54.9	56.6	58.4	58.3	57.6	56.8	2.24537
138	846	C	10	6	117	119	96.68	110.33	94.6215	47.4	49.2	49.3	48.7	48.2	49.9	51.9	52	51.7	51.5	1.4671
138	846	C	10	6	121	123	96.72	110.37	94.6576	44	46.7	47.4	47.1	47	49.6	51.9	52.2	51.7	51.7	1.01821
138	846	C	10	6	125	127	96.76	110.41	94.6945	47.7	50.4	51.1	50.8	50.4	52.2	54.3	54.3	53.6	52.9	1.50476
138	846	C	10	6	129	131	96.8	110.45	94.7315	42.5	44.8	45.3	45	44.7	46.8	49	49.3	48.5	48.9	0.818715
138	846	C	10	6	133	135	96.84	110.49	94.7676	40.9	43.3	43.9	43.7	43.7	46.1	48.4	48.9	48.4	48.5	0.606979
138	846	C	10	6	137	139	96.88	110.53	94.8046	38.1	41.2	42.2	42.6	42.7	45.7	48.3	48.5	48.4	47.9	0.237141
138	846	C	10	6	141	143	96.92	110.57	94.8407	36.9	39.7	41	41.2	41.4	44.8	47.1	47.7	47.3	46.8	0.0781066
138	846	C	10	6	145	147	96.96	110.61	94.8777	35.8	39.2	40.4	40.7	41	44.2	46.9	47.3	46.9	46.1	-0.0677522
138	846	C	10	7	1	3	97.02	110.67	94.9317	32.9	36.5	38	38.4	38.8	42.6	45.9	46.4	46.1	45.6	-0.451231
138	846	C	10	7	5	7	97.06	110.71	94.9654	29.8	33.2	35	35.6	36.2	40.2	43.5	44.2	43.9	43.9	-0.860596
138	846	C	10	7	9	11	97.1	110.75	94.9982	30.3	33.8	35.2	35.7	36.4	40	42.9	43.5	43.3	42.8	-0.79565
138	846	C	10	7	13	15	97.14	110.79	95.0318	35.1	38.6	40.1	40.7	41.4	44.9	47.8	48.3	48.1	47.7	-0.164167
138	846	C	10	7	17	19	97.18	110.83	95.0654	30.4	34.1	35.8	36.4	37.3	41.6	44.8	45.5	45.3	45.3	-0.784336
138	846	C	10	7	21	23	97.22	110.87	95.0982	29.1	32.7	34.6	35.2	36.2	40.8	44.2	44.9	44.9	44.7	-0.956545
138	846	C	10	7	25	27	97.26	110.91	95.1317	29	32.4	34.2	35.2	36.3	40.9	44.4	45.2	45.2	45.1	-0.970651
138	846	C	10	7	29	31	97.3	110.95	95.165	28.6	32	34.1	35.1	36.5	41.5	45.1	46.2	46.2	46.2	-1.02428
138	846	C	10	7	33	35	97.34	110.99	95.1983	26.7	30.1	31.9	33.1	34.5	39.6	43.4	44.6	44.7	44.8	-1.27554
138	846	C	10	7	37	39	97.38	111.03	95.2316	27	30.7	32.7	33.8	35.3	40.5	44.4	45.6	45.8	46	-1.23695
138	846	C	10	7	41	43	97.42	111.07	95.2657	27.4	30.7	32.3	33.1	34.1	38.3	41.6	42.1	41.9	42.3	-1.18518
138	846	C	10	7	45	47	97.46	111.11	95.2989	26.1	29.4	31.1	31.8	33	37.8	41.5	42.5	42.6	42.3	-1.35739
138	846	C	10	7	49	51	97.5	111.15	95.3317	28.2	31.9	33.5	34.3	35.2	39.5	42.9	43.7	43.4	42.9	-1.08164
138	846	C	10	7	53	55	97.54	111.19	95.3646	28.4	31.7	33.4	33.8	34.7	38.6	41.9	42.6	42.4	42.8	-1.05622
138	846	C	10	7	57	59	97.58	111.23	95.3975	30.8	34.2	35.4	35.9	36.4	39.9	43	43.5	43.5	43.4	-0.740941
138	846	C	10	7	61	63	97.62	111.27	95.4304	31	34	35.6	36.1	36.8	40.7	43.8	44.6	44.4	44.6	-0.715521
138	846	C	10	7	65	67	97.66	111.31	95.4641	34.5	38.3	39.9	40.4	41.4	44.9	48	48.6	48.2	48.1	-0.255317
138	846	C	11	1	1	3	97.52	111.66	95.9989	45.6	49.1	50	49.7	49.5	51.3	53.4	53.6	53	52.6	1.199
138	846	C	11	1	5	7	97.56	111.7	96.0317	39.3	41.5	42.1	41.9	41.6	43.8	46	46.2	45.6	45.4	0.368024
138	846	C	11	1	9	11	97.6	111.74	96.0637	49.6	52.2	52.6	52	51.4	52.8	54.6	54.4	53.4	52.9	1.72415
138	846	C	11	1	13	15	97.64	111.78	96.0957	50.7	53.9	54.7	54.5	54.2	55.9	57.8	58	57.4	57.1	1.86815
138	846	C	11	1	17	19	97.68	111.82	96.1288	51.1	54.6	55.6	55.6	55.6	57.7	59.7	59.8	58.9	58.5	1.91992
138	846	C	11	1	21	23	97.72	111.86	96.1632	47.9	51.7	52.9	53.3	53.9	56.6	59.2	59.6	58.6	58.6	1.49738
138	846	C	11	1	25	27	97.76	111.9	96.1967	45.1	48.6	50	50.5	51.2	54.4	57	57.5	57	56.6	1.12754
138	846	C	11	1	29	31	97.8	111.94	96.2302	42.1	45.3	46.4	46.7	47.2	50.1	52.5	53.2	53	52.5	0.731348
138	846	C	11	1	33	35	97.84	111.98	96.2637	45	48.2	49.1	49.1	49.2	51.6	53.9	54.1	54.1	53.7	1.1125
138	846	C	11	1	37	39	97.88	112.02	96.2972	41.6	44.8	45.9	46.1	46.5	49.3	51.7	52.5	52.2	51.8	0.663611
138	846	C	11	1	41	43	97.92	112.06	96.3316	42.1	45.2	46.2	46.2	46.3	48.9	51.3	51.7	51.6	51	0.728557
138	846	C	11	1	45	47	97.96	112.1	96.3651	41.2	44.6	45.9	46.2	46.5	49.7	52.3	52.7	52.6	52.1	0.609048
138	846	C	11	1	49	51	98	112.14	96.3986	42.2	45.6	47	47.3	47.8	50.7	53.3	53.7	53.2	52.9	0.739871
138	846	C	11	1	53	55	98.04	112.18	96.4321	40.2	43.2	44.3	44.5	44.9	47.9	50.4	50.9	50.6	50.5	0.475434
138	846	C	11	1	57	59	98.08	112.22	96.4665	42.2	45.1	46.2	46.4	46.6	49.5	52	52.5	52.2	52.1	0.738009
138	846	C	11	1	61	63	98.12	112.26	96.5009	47.8	51.3	52.5	52.6	52.7	54.9	57.1	57.2	56.4	55.9	1.4749
138	846	C	11	1	65	67	98.16	112.3	96.5361	46.9	49.4	50.1	49.8	49.5	51.3	53.5	53.6	52.8	52.2	1.35539
138	846	C	11	1	69	71	98.2	112.34	96.5713	43.8	46.8	48.1	48.3	48.7	51.4	53.9	54.3	54.2	53.8	0.946022
138	846	C	11	1	73	75	98.24	112.38	96.6065	41.7	45	46.3	46.8	47.3	50.2	52.9	53.3	53.3	53.1	0.668411
138	846	C	11	1	77	79	98.28	112.42	96.6429	38.7	42.1	43.5	43.9	44.7	47.9	50.7	51.3	51.2	51.1	0.272221
138	846	C	11	1	81	83	98.32	112.46	96.6793	40.2	43.8	45.2	45.8	46.5	49.8	52.6	53.2	52.7	52.5	0.46892
138	846	C	11	1	85	87	98.36	112.5	96.7157	38.4	42	43.7	44.3	45.1	48.8	51.5	51.8	51.7	51.8	0.230834
138	846	C	11	1	89	91	98.4	112.54	96.752	39.9	43.7	45.2	45.7	46.4	49.9	52.7	53	52.6	52.5	0.427533
138	846	C	11	1	93	95	98.44	112.58	96.7893	41	44.6	46	46.1	46.4	49.4	52.1	52.3	51.9	52	0.57153
138	846	C	11	1	97	99	98.48	112.62	96.8256	38.5	41.7	42.9	43.2	43.5	46.6	49.2	49.6	49.7	48.8	0.241218
138	846	C	11	1	101	103	98.52	112.66	96.862	38.4	41.9	43.4	43.8	44.2	47.3	50	50.5	50	49.9	0.227112
138	846	C	11	1	105	107	98.56	112.7	96.8984	37	40.9	42.4	42.7	43.3	47	49.9	50.5	50.2	49.8	0.0417271
138	846	C	11	1	109	111	98.6	112.74	96.9347	36.4	40.2	41.8	42.2	42.7	46.2	49.1	49.6	49.4	48.9	-0.0382552
138	846	C	11	1	113	115	98.64	112.78	96.972	37.5	41.1	42.5	42.8	43.3	46.5	49.2	49.7	49.2	49.1	0.105742
138	846	C	11	1	117	119	98.68	112.82	97.0084	36.5	40	41.4	41.6	41.9	45.1	47.8	48.1	47.8	47.8	-0.0269412
138	846	C	11	1	121	123	98.72	112.86	97.0447	35.8	38.5	39.4	39.5	39.7	42.5	44.9	45.1	45.2	45.6	-0.120099
138	846	C	11	1	125	127	98.76	112.9	97.0811	37.2	40.6	41.7	42	42.3	45.4	48.1	48.7	48	47.9	0.0634246
138	846	C	11	1	129	131	98.8	112.94	97.1184	36.9	39.9	40.7	40.7	40.9	43.6	46.3	46.6	46.2	46.4	0.0229682
138	846	C	11	1	133	135	98.84	112.98	97.1547	35.2	38	38.9	38.9	39.1	41.9	44.7	45	44.9	45.2	-0.201942
138	846	C	11	1	137	139	98.88	113.02	97.1911	37.7	40.5	41.6	41.5	41.6	44.4	46.9	47.1	46.9	47	0.126509
138	846	C	11	1	141	143	98.92	113.06	97.2271	41.3	44.3	45.3	45.3	45.4	48	50.5	51.1	50.4	50	0.599889
138	846	C	11	2	1	3	99.02	113.16	97.3155	43	45.7	46.4	46.2	45.7	47.8	50.1	50.3	49.6	49	0.821542
138	846	C	11	2	5	7	99.06	113.2	97.3516	41.4	44.4	45.2	45.1	45	47.3	49.7	49.9	49.5	49.4	0.609807
138	846	C	11	2	9	11	99.1	113.24	97.385	38.1	40	40.4	40.1	40.1	42.4	44.7	45.4	45.4	45	0.174092
138	846	C	11	2	13	15	99.14	113.28	97.4193	35.9	37.4	37.9	37.7	37.5	39.8	42.4	43.1	43.1	43.4	-0.116695
138	846	C	11	2	17	19	99.18	113.32	97.4535	41	43.4	44.1	43.9	43.6	45.9	48.1	48.5	48	47.4	0.554314
138	846	C	11	2	21	23	99.22	113.36	97.4878	45.2	48.2	48.9	49	49.1	51.4	53.7	54.1	53.7	53.2	1.10675
138	846	C	11	2	25	27	99.26	113.4	97.5221	43.1	45.8	46.7	46.7	46.8	49.2	51.5	52.1	52	51.6	0.829134
138	846	C	11	2	29	31	99.3	113.44	97.5564	44.8	47.2	47.8	47.7	47.7	50	52.2	52.7	52.6	52.3	1.05218
138	846	C	11	2	33	35	99.34	113.48	97.5907	47.7	50	50.5	50.3	50.2	52.2	54.2	54.5	54.1	53.6	1.43334
138	846	C	11	2	37	39	99.38	113.52	97.6245	45.5	48.6	49.3	49.3	49.2	51.6	53.7	54.2	53.8	53.7	1.14255
138	846	C	11	2	41	43	99.42	113.56	97.6571	50.7	53.9	54.7	54.3	54	55.6	57.5	57.5	56.8	56.1	1.82673
138	846	C	11	2	45	47	99.46	113.6	97.6898	50.9	53.9	54.4	54	53.7	55.3	57.1	57.2	56.7	56.1	1.85215
138	846	C	11	2	49	51	99.5	113.64	97.7224	49.9	52.7	53.3	52.9	52.6	54.1	55.9	55.9	55.1	54.7	1.71947
138	846	C	11	2	53	55	99.54	113.68	97.7551	49.6	52	52.6	52.3	52.1	53.6	55.5	55.6	55.2	54.5	1.67901
138	846	C	11	2	57	59	99.58	113.72	97.7877	42.2	44.6	45.3	45.3	45.3	47.7	50	50.5	50.3	50.2	0.703112
138	846	C	11	2	61	63	99.62	113.76	97.8203	47.9	50.7	51.4	51.1	50.8	52.4	54.5	54.7	54.2	53.9	1.45317
138	846	C	11	2	65	67	99.66	113.8	97.853	39.2	42.1	43.2	43.3	43.6	46.7	49.3	50	49.9	49.8	0.305992
138	846	C	11	2	69	71	99.7	113.84	97.8856	40.1	43	43.9	43.8	43.7	46.2	48.6	48.9	48.7	48.5	0.423639
138	846	C	11	2	73	75	99.74	113.88	97.9183	39.5	43.1	44.2	44.4	44.7	47.2	49.7	50.1	49.5	49.3	0.343656
138	846	C	11	2	77	79	99.78	113.92	97.9527	38.1	41.7	42.9	43	43.3	46.2	48.8	49.3	48.8	48.5	0.158272
138	846	C	11	2	81	83	99.82	113.96	97.9862	33.6	36.5	37.7	38	38.6	41.8	44.8	45.4	45.4	45.3	-0.435547
138	846	C	11	2	85	87	99.86	114	98.0184	33.9	37	38.4	38.7	39.2	42.6	45.5	46.1	46	46	-0.396952
138	846	C	11	2	89	91	99.9	114.04	98.0504	31.5	34.6	36.2	36.7	37.6	41.2	44.3	45	44.6	45.1	-0.714089
138	846	C	11	2	93	95	99.94	114.08	98.0832	32.2	35.3	36.7	37.3	38.1	41.9	44.9	45.6	45.5	45.5	-0.622793
138	846	C	11	2	97	99	99.98	114.12	98.1152	31.2	34.4	36	36.7	37.5	41.8	45.1	45.8	46	46	-0.755476
138	846	C	11	2	101	103	100.02	114.16	98.1472	34.3	37.4	38.9	39.5	40.3	44	47.1	47.8	48	47.6	-0.347973
138	846	C	11	2	105	107	100.06	114.2	98.1792	31	34.1	35.7	36.5	37.5	41.8	45.2	46.1	46.2	46.2	-0.783688
138	846	C	11	2	109	111	100.1	114.24	98.2112	29.6	32.9	34.6	35.6	36.7	41	44.3	45.2	45.2	45.5	-0.969073
138	846	C	11	2	113	115	100.14	114.28	98.244	29.4	32.7	34.6	35.5	36.6	40.7	44	44.8	44.7	44.9	-0.996354
138	846	C	11	2	117	119	100.18	114.32	98.276	28.2	31.3	32.8	33.5	34.3	38.3	41.5	42.2	42.1	42.1	-1.15539
138	846	C	11	2	121	123	100.22	114.36	98.308	29	32.1	33.6	34.1	34.9	38.6	41.7	42.3	42.2	42	-1.05092
138	846	C	11	2	125	127	100.26	114.4	98.3416	29.1	32.2	33.7	34.2	35	38.8	42	42.8	43	42.8	-1.03867
138	846	C	11	2	129	131	100.3	114.44	98.3744	30.7	34	35.5	36.3	37.1	41.2	44.4	45.2	45	45.3	-0.828798
138	846	C	11	2	133	135	100.34	114.48	98.408	32	35.8	37.3	38	38.9	42.9	46.2	46.9	47.1	46.8	-0.658449
138	846	C	11	2	137	139	100.38	114.52	98.4408	31.9	35.2	36.9	37.5	38.5	42.3	45.5	46.2	46.4	46.3	-0.672555
138	846	C	11	2	141	143	100.42	114.56	98.4744	33.6	36.8	38.5	39	40	43.8	46.7	47.6	47.6	47.4	-0.449506
138	846	C	11	2	145	147	100.46	114.6	98.5081	34	37.5	39.1	39.8	40.6	44.5	47.6	48.2	48.4	48.1	-0.397735
138	846	C	11	3	1	3	100.52	114.66	98.5573	35.3	38.8	40.3	40.9	41.7	45.3	48.2	48.8	48.7	48.7	-0.227853
138	846	C	11	3	5	7	100.56	114.7	98.5909	35.2	38.7	40.3	40.9	41.7	45.3	48.2	48.8	48.6	48.1	-0.241958
138	846	C	11	3	9	11	100.6	114.74	98.6237	34.9	38.2	39.8	40.3	41	44.4	47.4	47.9	47.9	47.8	-0.282415
138	846	C	11	3	13	15	100.64	114.78	98.6573	36.6	40.1	41.7	42.4	43.1	46.6	49.5	50	49.8	49.6	-0.0593656
138	846	C	11	3	17	19	100.68	114.82	98.6901	37.8	41.4	42.9	43.2	43.6	47	49.8	49.9	49.5	49.8	0.0978073
138	846	C	11	3	21	23	100.72	114.86	98.7237	36.5	40.2	41.7	42.3	42.9	46.5	49.3	50.1	49.8	49.4	-0.0744021
138	846	C	11	3	25	27	100.76	114.9	98.7565	36.1	39.2	40.6	40.6	40.9	44.1	46.7	47	46.9	46.6	-0.128034
138	846	C	11	3	29	31	100.8	114.94	98.7902	36.6	39.4	40.6	40.7	40.8	43.6	46.2	46.7	46.5	46.3	-0.063088
138	846	C	11	3	33	35	100.84	114.98	98.8238	37.7	40.2	41.4	41.6	41.6	44.6	47.2	47.7	47.5	47.3	0.0809096
138	846	C	11	3	37	39	100.88	115.02	98.8566	38.4	41.6	42.9	43.1	43.4	46.2	48.8	49.1	48.8	48.3	0.172206
138	846	C	11	3	41	43	100.92	115.06	98.8902	37.6	40.7	41.8	41.9	42	44.8	47.4	47.8	47.7	47.8	0.0658731
138	846	C	11	3	45	47	100.96	115.1	98.923	38.2	41.3	42.2	42	42	44.5	46.9	47.2	46.9	46.7	0.143994
138	846	C	11	3	49	51	101	115.14	98.9576	37.1	40.6	42	42.2	42.7	46.5	49.6	50.3	50	49.5	-0.00186461
138	846	C	11	3	53	55	101.04	115.18	98.9919	42	45.7	46.7	46.6	46.5	48.8	51.2	51.4	51	50.6	0.642794
138	846	C	11	3	57	59	101.08	115.22	99.0271	43.2	46.4	47.2	47	46.7	48.7	50.9	51.2	50.7	50	0.799967
138	846	C	11	3	61	63	101.12	115.26	99.0615	40.8	43.8	44.9	45	45.1	47.7	50.1	50.4	50.3	49.7	0.482829
138	846	C	11	3	65	67	101.16	115.3	99.0967	41	44.3	45.5	45.6	45.6	48.4	50.8	51.2	51.1	50.4	0.508249
138	846	C	11	3	69	71	101.2	115.34	99.1311	37.4	40.4	41.8	42.2	42.5	45.7	48.2	49	48.5	48.3	0.0330082
138	846	C	11	3	73	75	101.24	115.38	99.1663	36.3	39.8	41.1	41.4	41.9	45.3	48.1	48.5	48.4	48	-0.112851
138	846	C	11	3	77	79	101.28	115.42	99.2007	35	38.4	39.8	40.3	40.8	44.1	46.9	47.4	47.3	47.1	-0.28506
138	846	C	11	3	81	83	101.32	115.46	99.2359	34.7	38.1	39.6	40	40.5	43.9	46.7	47.3	47.3	47.1	-0.325516
138	846	C	11	3	85	87	101.36	115.5	99.2703	37.3	40.6	41.9	42.3	42.8	46	48.6	49.3	49.1	49	0.0161105
138	846	C	11	3	89	91	101.4	115.54	99.3055	39.1	42.6	44	44.4	45	48	50.7	51.2	51	50.7	0.252335
138	846	C	11	3	93	95	101.44	115.58	99.3407	32.3	35.6	37.2	37.8	38.5	42.7	45.9	46.6	46.8	46.4	-0.644515
138	846	C	11	3	97	99	101.48	115.62	99.3751	33.9	37.2	38.6	39.3	40.1	43.7	46.7	47.4	47.4	47.1	-0.434641
138	846	C	11	3	101	103	101.52	115.66	99.4103	34.6	38.3	39.9	40.7	41.6	45.2	48.2	48.9	48.9	48.9	-0.343345
138	846	C	11	3	105	107	101.56	115.7	99.4447	33.4	37	38.8	39.5	40.5	44.4	47.6	48.3	48	48	-0.502379
138	846	C	11	3	109	111	101.6	115.74	99.4799	35.3	38.9	40.7	41.5	42.4	46.4	49.6	50.5	50.4	50.5	-0.252979
138	846	C	11	3	113	115	101.64	115.78	99.5143	37.8	41.2	42.9	43.6	44.5	48.3	51.2	52	52	52.2	0.0754727
138	846	C	11	3	117	119	101.68	115.82	99.5495	36.2	39.8	41.7	42.6	44	48.1	51.3	52.3	52.7	52.7	-0.136263
138	846	C	11	3	121	123	101.72	115.86	99.5839	33.1	36.7	38.8	40.1	41.8	46.5	50.1	51.2	51.8	51.9	-0.545627
138	846	C	11	3	125	127	101.76	115.9	99.6191	32.2	35.9	37.9	39.2	40.9	45.7	49.3	50.4	50.8	50.9	-0.665135
138	846	C	11	3	129	131	101.8	115.94	99.6535	31.5	35.2	37.4	38.8	40.6	45.7	49.4	50.6	50.9	51.3	-0.758293
138	846	C	11	3	133	135	101.84	115.98	99.6887	31	34.5	36.3	37.5	38.8	43.3	46.7	47.7	48	48.2	-0.8251
138	846	C	11	3	137	139	101.88	116.02	99.7217	29.6	33.3	35.4	36.8	38.5	43.9	47.8	49	49.4	49.5	-1.01048
138	846	C	11	3	141	143	101.92	116.06	99.7554	29.9	33.6	35.9	37.4	39.2	44.6	48.5	49.7	50.2	50.6	-0.971889
138	846	C	11	3	145	147	101.96	116.1	99.7882	29.5	33.2	35.5	36.8	38.7	44.5	48.4	49.8	50.8	50.9	-1.02552
138	846	C	11	4	1	3	102.02	116.16	99.8382	31.1	35	37.4	39	41	46.4	50.4	51.7	52.2	52.3	-0.816112
138	846	C	11	4	5	7	102.06	116.2	99.8718	32.5	36.4	38.7	40.2	42.3	47.7	51.8	53.2	53.7	53.9	-0.632589
138	846	C	11	4	9	11	102.1	116.24	99.9046	32.2	36.2	38.5	40.1	42.1	47.2	51.1	52.3	52.7	52.8	-0.673045
138	846	C	11	4	13	15	102.14	116.28	99.9382	30.8	34.5	36.7	38.2	40.2	45.6	49.5	50.9	51.3	51.3	-0.85843
138	846	C	11	4	17	19	102.18	116.32	99.9702	32.6	36.2	38.1	39.4	41.2	46.2	49.9	51.1	51.7	51.7	-0.622206
138	846	C	11	4	21	23	102.22	116.36	100.002	35	38.7	40.7	42.1	43.6	48	51.4	52.4	52.4	52.7	-0.306929
138	846	C	11	4	25	27	102.26	116.4	100.034	32.5	35.8	37.8	39	40.5	45.2	48.7	50	50.1	50.8	-0.637242
138	846	C	11	4	29	31	102.3	116.44	100.067	31.2	35.1	37.4	38.9	40.6	46.1	50.1	51.5	52	52.1	-0.809451
138	846	C	11	4	33	35	102.34	116.48	100.099	32.4	36.5	38.5	40	41.7	46.5	50.1	51.3	51.5	51.9	-0.652279
138	846	C	11	4	37	39	102.38	116.52	100.131	30.6	34.5	36.7	38.1	39.8	45.2	49.1	50.5	51	51.3	-0.890364
138	846	C	11	4	41	43	102.42	116.56	100.163	32.3	35.7	37.7	39	40.5	45	48.5	49.5	49.7	50	-0.667315
138	846	C	11	4	45	47	102.46	116.6	100.195	30.5	33.8	35.6	36.7	38	42.3	45.5	46.4	46.6	46.8	-0.905401
138	846	C	11	4	49	51	102.5	116.64	100.228	31.4	35	37.1	38.3	39.9	44.7	48.1	49.2	49.4	49.9	-0.787754
138	846	C	11	4	53	55	102.54	116.68	100.26	33.1	36.6	38.6	39.8	41.3	45.9	49.4	50.5	50.6	50.7	-0.564705
138	846	C	11	4	57	59	102.58	116.72	100.293	33.6	37.2	39.3	40.4	42.1	46.5	49.9	50.8	50.9	51.2	-0.499759
138	846	C	11	4	61	63	102.62	116.76	100.327	33.4	37.1	39.2	40.5	42.2	46.8	50.3	51.2	51.5	51.7	-0.52704
138	846	C	11	4	65	67	102.66	116.8	100.361	30.5	34	35.8	37	38.7	43.7	47.2	48.3	48.8	48.9	-0.910054
138	846	C	11	4	69	71	102.7	116.84	100.395	30.2	33.8	36.1	37.4	39	44.3	47.9	48.9	49.5	49.8	-0.95051
138	846	C	11	4	73	75	102.74	116.88	100.428	29.9	33.5	35.2	36.4	37.8	42.3	45.7	46.2	46.5	46.9	-0.990967
138	846	C	11	4	77	79	102.78	116.92	100.462	27	30.1	31.9	32.8	33.9	38.4	41.7	42.4	42.4	42.4	-1.37398
138	846	C	11	4	81	83	102.82	116.96	100.495	28.5	32	33.6	34.4	35.4	39.4	42.4	43	43.2	43.5	-1.17728
138	846	C	11	4	85	87	102.86	117	100.529	28.8	32.5	34.3	35.1	36.1	40.2	43.3	44.1	44.1	44.1	-1.13869
138	846	C	11	4	89	91	102.9	117.04	100.563	30.3	33.9	35.4	36	36.6	40.1	43	43.4	43.1	42.9	-0.941988
138	846	C	11	4	93	95	102.94	117.08	100.596	31.4	34.7	36.3	36.9	37.6	41.1	44.2	44.7	44.6	44.4	-0.797991
138	846	C	11	4	97	99	102.98	117.12	100.63	32.7	36.3	37.9	38.5	39.1	42.6	45.5	45.9	45.6	45	-0.627642
138	846	C	11	4	101	103	103.02	117.16	100.666	34.1	37.1	38.3	38.5	38.9	41.9	44.7	45	44.6	44.2	-0.444119
138	846	C	11	4	105	107	103.06	117.2	100.705	33.8	36.5	37.6	37.9	38.3	41.5	44.3	44.9	44.7	44.9	-0.484575
138	846	C	11	4	109	111	103.1	117.24	100.744	36.7	39.8	41.1	41.3	41.6	44.4	47	47.2	46.8	46.5	-0.103423
138	846	C	11	4	113	115	103.14	117.28	100.783	35.6	38.9	40.2	40.6	40.9	44	46.8	47.3	47	47	-0.249281
138	846	C	11	4	117	119	103.18	117.32	100.821	35.7	39.2	40.5	40.9	41.3	44.3	47	47.4	47.3	47.2	-0.237037
138	846	C	11	4	121	123	103.22	117.36	100.861	35.2	38.1	39.2	39.3	39.6	42.6	45.4	45.8	45.5	45	-0.303844
138	846	C	11	4	125	127	103.26	117.4	100.9	37.9	41.6	42.7	42.5	42.4	45.1	47.5	47.6	47.2	47.2	0.0509584
138	846	C	11	4	129	131	103.3	117.44	100.94	38.6	41.3	42.2	42.2	42.3	44.8	47.3	47.6	47.3	47.2	0.142255
138	846	C	11	4	133	135	103.34	117.48	100.979	38.4	41.5	42.5	42.4	42.5	44.9	47.5	47.7	47.2	46.7	0.114974
138	846	C	11	4	137	139	103.38	117.52	101.017	32.9	35.4	36.4	36.4	36.6	39.6	42.4	42.8	42.6	42.4	-0.610598
138	846	C	11	4	141	143	103.42	117.56	101.056	39.9	42.1	42.4	41.9	41.6	43.5	45.9	46.1	45.6	45.2	0.310742
138	846	C	11	4	145	147	103.46	117.6	101.095	36.2	38	38.2	37.7	37.3	39.4	41.7	42.1	41.9	41.7	-0.177675
138	846	C	11	5	1	3	103.52	117.66	101.154	35.6	38	38.4	38	37.7	39.7	41.9	41.9	41.7	41.6	-0.258122
138	846	C	11	5	5	7	103.56	117.7	101.193	37	39.3	40	39.6	39.1	41.3	43.6	43.9	43.3	43	-0.0745987
138	846	C	11	5	9	11	103.6	117.74	101.231	37.9	40.5	41.2	40.7	40.2	42.2	44.5	44.7	44.1	43.8	0.0430483
138	846	C	11	5	13	15	103.64	117.78	101.27	36.2	39.3	39.7	39.3	38.8	40.8	43.1	43.2	43	42.2	-0.181862
138	846	C	11	5	17	19	103.68	117.82	101.31	36.6	38.8	39	38.1	37.4	39.2	41.3	41.5	40.9	40.4	-0.130092
138	846	C	11	5	21	23	103.72	117.86	101.349	38.3	40.9	41.3	40.6	40	41.6	43.7	44.1	43.6	42.8	0.0929576
138	846	C	11	5	25	27	103.76	117.9	101.389	38.2	40.5	40.8	40.1	39.5	41.3	43.6	43.7	43.1	42.6	0.0788517
138	846	C	11	5	29	31	103.8	117.94	101.429	32.2	33.6	33.8	33.5	33.3	35.7	38.3	39	39	38.9	-0.712596
138	846	C	11	5	33	35	103.84	117.98	101.469	40.1	42.5	42.9	42.3	41.5	43.1	45.4	45.6	45.1	44.9	0.327321
138	846	C	11	5	37	39	103.88	118.02	101.512	40.9	43.7	44.4	44.1	43.7	45.4	47.5	47.6	47.3	47.3	0.431793
138	846	C	11	5	41	43	103.92	118.06	101.555	46	48.8	49.1	48.7	47.9	49.1	51.2	51.1	50	49.8	1.1028
138	846	C	11	5	45	47	103.96	118.1	101.602	41	43.2	43.9	43.5	43.2	45.2	47.4	47.6	47.2	47.5	0.443107
138	846	C	11	5	49	51	104	118.14	101.654	41.3	43.7	44.4	44.2	44.1	46.2	48.5	49	48.8	48.7	0.481702
138	846	C	11	5	53	55	104.04	118.18	101.704	37.9	39.9	40.6	40.4	40.3	42.6	45.2	45.7	45.7	46	0.0328116
138	846	C	11	5	57	59	104.08	118.22	101.754	38.9	41.2	41.8	41.5	41.3	43.4	45.7	46	45.9	45.8	0.163634
138	846	C	11	5	61	63	104.12	118.26	101.804	43.1	45.4	45.9	45.4	44.8	46.4	48.4	48.5	48.1	47.5	0.716065
138	846	C	11	5	65	67	104.16	118.3	101.855	45.2	47.9	48.5	48.2	47.8	49.5	51.5	51.6	50.8	50.2	0.991816
138	846	C	11	5	69	71	104.2	118.34	101.906	39.4	41.8	42.5	42.4	42.4	44.7	47.1	47.5	47.3	47.2	0.226719
138	846	C	11	5	73	75	104.24	118.38	101.954	40.8	43.8	44.8	44.8	44.9	47.3	49.6	49.9	49.6	49.5	0.410242
138	846	C	11	5	77	79	104.28	118.42	101.998	40.2	42.7	43.5	43.4	43.3	45.6	48	48.3	48.1	47.9	0.33026
138	846	C	11	5	81	83	104.32	118.46	102.04	41.5	43.7	44.2	44	43.8	45.9	48.1	48.4	47.9	47.6	0.500608
138	846	C	11	5	85	87	104.36	118.5	102.084	41.5	44.1	44.7	44.5	44.2	46.2	48.4	48.6	48.1	47.8	0.499677
138	846	C	11	5	89	91	104.4	118.54	102.127	36.7	39.4	40.1	40	40	42.5	45.1	45.4	45.1	45.1	-0.133667
138	846	C	11	5	93	95	104.44	118.58	102.164	35.2	38.4	39.6	39.8	40.2	43.3	46.1	46.7	46.5	46.3	-0.332227
138	846	C	11	5	97	99	104.48	118.62	102.203	38.3	41.3	42.3	42.3	42.3	45	47.5	47.7	47.4	47	0.0752761
138	846	C	11	5	101	103	104.52	118.66	102.239	36.3	39	39.8	39.6	39.5	41.9	44.4	44.7	44.3	44.1	-0.18916
138	846	C	11	5	105	107	104.56	118.7	102.275	36.4	39.2	40.1	40.1	40.1	42.9	45.4	45.8	45.5	45.5	-0.176916
138	846	C	11	5	109	111	104.6	118.74	102.31	33.2	36.5	37.8	38.1	38.6	42.3	45.4	46	45.9	45.6	-0.599455
138	846	C	11	5	113	115	104.64	118.78	102.344	36.1	38.7	39.3	39.1	39.1	41.6	44.2	44.7	44.4	44.2	-0.218303
138	846	C	11	5	117	119	104.68	118.82	102.38	36.8	39.8	40.8	40.7	40.7	43.1	45.5	45.5	44.7	44.3	-0.127006
138	846	C	11	5	121	123	104.72	118.86	102.414	39.5	43	43.8	43.4	43.2	45.4	47.7	47.8	47.1	46.7	0.227796
138	846	C	11	5	125	127	104.76	118.9	102.448	39.2	42.8	43.6	43.3	42.9	45	47.3	47.3	46.5	45.8	0.187339
138	846	C	11	5	129	131	104.8	118.94	102.483	39.6	42.7	43.5	43.1	42.6	44.7	46.9	47.2	46.6	46.1	0.23911
138	846	C	11	5	133	135	104.84	118.98	102.517	38.4	41.1	41.8	41.4	41.1	43.4	45.8	45.9	45.4	44.7	0.0800759
138	846	C	11	5	137	139	104.88	119.02	102.551	38.3	40.8	41.5	41.3	41.1	43.5	45.9	46.1	45.7	45.2	0.06597
138	846	C	11	5	141	143	104.92	119.06	102.585	42	44.4	45.1	44.9	44.8	47.1	49.5	49.8	49.3	49.2	0.552525
138	846	C	11	5	145	147	104.96	119.1	102.618	45.6	49	49.7	49.4	49	50.7	52.7	52.7	52	51.4	1.0259
138	846	C	11	6	1	3	105.02	119.16	102.669	39.7	42.6	43.7	44.1	44.7	47.4	49.9	50.4	50	49.5	0.247167
138	846	C	11	6	5	7	105.06	119.2	102.703	41	44	44.8	44.9	45.2	47.8	50	50.3	49.7	48.8	0.417515
138	846	C	11	6	9	11	105.1	119.24	102.736	41	43.4	44.2	44.2	44.1	46.6	48.7	49.2	48.9	48.8	0.416584
138	846	C	11	6	13	15	105.14	119.28	102.77	44.2	47.3	48.3	48.3	48.2	50.1	52.4	52.4	52.2	51.3	0.837263
138	846	C	11	6	17	19	105.18	119.32	102.803	43.3	46.1	46.9	46.4	46	47.7	49.7	50	49	49.1	0.717755
138	846	C	11	6	21	23	105.22	119.36	102.836	41.2	44	44.6	44.6	44.5	46.9	49.1	49.5	49.4	48.7	0.440143
138	846	C	11	6	25	27	105.26	119.4	102.871	41.2	44.1	45.1	45.1	45.1	47.6	50.1	50.5	50.2	49.4	0.439213
138	846	C	11	6	29	31	105.3	119.44	102.903	42.1	44.8	45.3	44.9	44.5	46.3	48.4	48.6	48	47.5	0.55686
138	846	C	11	6	33	35	105.34	119.48	102.937	42.6	45.4	46	45.7	45.2	47.1	49.2	49.4	48.8	48.2	0.621805
138	846	C	11	6	37	39	105.38	119.52	102.97	41	43.8	44.6	44.4	44.2	46.3	48.5	48.8	48.3	47.5	0.41007
138	846	C	11	6	41	43	105.42	119.56	103.003	39.9	42.4	43.2	42.9	42.6	44.6	47	47.3	47	46.7	0.264211
138	846	C	11	6	45	47	105.46	119.6	103.036	39.5	41.7	42.2	41.9	41.6	43.5	45.8	46.2	46	45.8	0.21058
138	846	C	11	6	49	51	105.5	119.64	103.069	38.6	41.6	42.4	42.2	42.2	44.4	46.7	47	46.5	46.1	0.0910715
138	846	C	11	6	53	55	105.54	119.68	103.101	36.1	39.4	40.4	40.5	40.6	43	45.5	45.8	45.4	45.2	-0.239241
138	846	C	11	6	57	59	105.58	119.72	103.133	34.9	37.9	39.1	39.3	39.5	42.2	44.7	45.2	44.9	44.6	-0.398275
138	846	C	11	6	61	63	105.62	119.76	103.164	36	39.2	40.5	40.7	40.9	43.6	46.1	46.4	45.8	45.5	-0.254278
138	846	C	11	6	65	67	105.66	119.8	103.196	33.8	36.6	38	38.4	38.9	42.2	45.1	45.7	45.8	45.9	-0.545065
138	846	C	11	6	69	71	105.7	119.84	103.228	33	36	37.4	37.7	38.1	41.5	44.3	44.9	44.8	44.5	-0.651398
138	846	C	11	6	73	75	105.74	119.88	103.259	35.7	38.4	39.3	39.3	39.3	41.9	44.4	44.8	44.6	44.7	-0.296596
138	846	C	11	6	77	79	105.78	119.92	103.291	32.7	35.1	36	36.1	36.3	39.1	41.7	42.3	42.3	42.1	-0.692785
138	846	C	11	6	81	83	105.82	119.96	103.322	33.4	36	36.9	37	37.2	39.9	42.4	42.8	42.8	42.6	-0.601488
138	846	C	11	6	85	87	105.86	120	103.354	33.6	36.5	37.7	37.8	38.1	40.8	43.5	44.1	43.8	43.4	-0.576068
138	846	C	11	6	89	91	105.9	120.04	103.386	31.7	34.6	35.8	36.1	36.5	39.3	42.1	42.6	42.4	42	-0.82733
138	846	C	11	6	93	95	105.94	120.08	103.417	31.9	35.2	36.7	37	37.5	40.7	43.7	44.3	44.1	44.1	-0.80191
138	846	C	11	6	97	99	105.98	120.12	103.449	33.5	36.5	37.6	37.9	38.2	40.9	43.6	43.9	43.7	43.4	-0.592036
138	846	C	11	6	101	103	106.02	120.16	103.48	34.9	38.1	39.3	39.6	39.8	42.5	45	45.3	45	44.5	-0.408512
138	846	C	11	6	105	107	106.06	120.2	103.508	35.1	37.8	38.9	39.1	39.3	42	44.5	44.7	44.4	44.2	-0.383092
138	846	C	11	6	109	111	106.1	120.24	103.537	36.1	39.5	40.8	41.1	41.5	44.4	47	47.2	46.9	47	-0.25227
138	846	C	11	6	113	115	106.14	120.28	103.57	36.7	39.8	41.4	41.6	41.9	44.4	47.1	47.4	46.9	46.6	-0.174149
138	846	C	11	6	117	119	106.18	120.32	103.602	35.9	39.6	41.1	41.6	42	44.8	47.5	47.8	47.3	47.2	-0.280482
138	846	C	11	6	121	123	106.22	120.36	103.634	30.9	34.2	35.8	36.4	37.2	40.8	44.1	44.8	44.6	45.1	-0.940177
138	846	C	11	6	125	127	106.26	120.4	103.666	37	40.8	42.3	42.9	43.3	46.4	48.9	49.5	49.1	48.8	-0.137415
138	846	C	11	6	129	131	106.3	120.44	103.698	37.2	40.7	42	42.5	43	45.8	48.5	48.9	48.5	48.4	-0.111995
138	846	C	11	6	133	135	106.34	120.48	103.73	37.5	40.9	42.3	42.8	43.4	46.4	49.1	49.6	49.4	48.9	-0.0733994
138	846	C	11	6	137	139	106.38	120.52	103.761	33.5	36.9	38.6	39.3	40.1	44.2	47.5	48.3	48.3	48.5	-0.601342
138	846	C	11	6	141	143	106.42	120.56	103.792	32.8	36	37.6	38	38.7	42.7	45.9	46.3	46.8	46.7	-0.694499
138	846	C	11	6	145	147	106.46	120.6	103.823	35.7	39	40.6	41.2	41.9	45.3	48.3	48.8	48.5	48.3	-0.313346
138	846	C	12	1	7	9	107.08	122.63	105.859	34.9	38	39.2	39.2	39.3	42.4	45.2	45.7	45.5	45.4	-0.465977
138	846	C	12	1	11	13	107.12	122.67	105.893	37.1	39.5	40	39.5	39	41.2	43.4	43.5	42.9	42.7	-0.177051
138	846	C	12	1	15	17	107.16	122.71	105.927	35.4	38.2	38.6	38	37.4	39.6	42	42.1	41.6	41.2	-0.401962
138	846	C	12	1	19	21	107.2	122.75	105.962	31.9	34.4	35	34.7	34.4	36.8	39.3	39.5	39.3	39.1	-0.864028
138	846	C	12	1	23	25	107.24	122.79	105.996	33.8	36.4	36.8	36.2	35.6	37.7	40.2	40.3	39.8	39.6	-0.614628
138	846	C	12	1	27	29	107.28	122.83	106.03	33	35.6	36.1	35.5	35	37.2	39.7	39.9	39.5	39.2	-0.720961
138	846	C	12	1	31	33	107.32	122.87	106.064	32.2	34.9	35.5	34.9	34.5	37	39.4	39.6	39.1	38.8	-0.827294
138	846	C	12	1	35	37	107.36	122.91	106.098	33.5	36	36.4	35.8	35.2	37.2	39.5	39.7	39.2	38.8	-0.656945
138	846	C	12	1	39	41	107.4	122.95	106.133	30.8	33.5	34	33.6	33.2	35.7	38.3	38.4	38	37.7	-1.01361
138	846	C	12	1	43	45	107.44	122.99	106.167	28	30.6	31.2	30.9	30.9	33.9	36.7	37.2	37	37.1	-1.38345
138	846	C	12	1	47	49	107.48	123.03	106.201	29.5	31.9	32.3	31.6	31.2	33.5	36	36.2	35.7	35.4	-1.18675
138	846	C	12	1	51	53	107.52	123.07	106.235	31.1	33.5	34	33.5	33	35.4	37.9	38	37.4	37	-0.976875
138	846	C	12	1	55	57	107.56	123.11	106.27	27.2	29.4	29.6	29	28.7	31.1	33.7	34	33.5	33.2	-1.49164
138	846	C	12	1	59	61	107.6	123.15	106.304	30.1	32.3	32.5	31.7	31	32.9	35.4	35.7	35.1	34.9	-1.11049
138	846	C	12	1	63	65	107.64	123.19	106.338	30.8	32.5	32.4	31.5	30.6	32.3	34.7	34.8	34.2	33.7	-1.01919
138	846	C	12	1	67	69	107.68	123.23	106.372	25.8	27.2	27.1	26.3	25.7	27.9	30.4	30.7	30.6	30.5	-1.67889
138	846	C	12	1	71	73	107.72	123.27	106.406	28.4	30.7	31	30.2	29.7	31.9	34.5	34.7	34.1	33.9	-1.33726
138	846	C	12	1	75	77	107.76	123.31	106.44	29.1	31.5	31.9	31.1	30.4	32.4	34.9	35	34.4	34.1	-1.24596
138	846	C	12	1	79	81	107.8	123.35	106.473	29	31.3	31.5	30.6	29.8	31.7	34.3	34.5	34	33.4	-1.26007
138	846	C	12	1	83	85	107.84	123.39	106.505	29.4	31.8	32.2	31.6	31.2	33.4	35.9	36.2	35.7	35.3	-1.2083
138	846	C	12	1	87	89	107.88	123.43	106.538	32.4	35.2	35.6	35	34.6	36.7	39.3	39.4	38.9	38.2	-0.813971
138	846	C	12	1	91	93	107.92	123.47	106.571	31.5	33.6	34	33.5	33.3	35.6	38.1	38.3	37.7	37.3	-0.93348
138	846	C	12	1	95	97	107.96	123.51	106.605	29.8	32.6	33.4	33.2	33.2	36.1	38.8	39.2	38.8	38.5	-1.15839
138	846	C	12	1	99	101	108	123.55	106.638	29.6	32.1	32.7	32.4	32.3	35.3	38	38.3	38.1	37.9	-1.18567
138	846	C	12	1	103	105	108.04	123.59	106.671	29.9	32.5	33.5	33.6	34.2	37.6	40.7	41.3	41.2	41	-1.14708
138	846	C	12	1	107	109	108.08	123.63	106.704	36	38.5	38.7	38	37.4	39.2	41.7	41.9	41.5	41	-0.344314
138	846	C	12	1	111	113	108.12	123.67	106.737	35.2	36.8	36.7	35.8	35	36.7	39	39.2	38.8	38.3	-0.450647
138	846	C	12	1	115	117	108.16	123.71	106.77	34.9	36.3	36	35.1	34.2	35.8	38.2	38.4	38.1	37.6	-0.491103
138	846	C	12	1	119	121	108.2	123.75	106.804	32.9	35.1	35.4	34.6	33.9	35.9	38.2	38.4	37.9	37.3	-0.75554
138	846	C	12	1	123	125	108.24	123.79	106.837	31.7	33.7	33.9	33	32.3	34.4	36.9	37.1	36.9	36.4	-0.914574
138	846	C	12	1	127	129	108.28	123.83	106.87	32.7	34.2	34.1	33.2	32.4	34.3	36.7	37.1	36.8	36.6	-0.783752
138	846	C	12	1	131	133	108.32	123.87	106.903	26.8	28.5	28.6	28	27.6	29.8	32.5	32.8	32.7	32.6	-1.56202
138	846	C	12	1	135	137	108.36	123.91	106.936	31	32.6	32.7	31.9	31.1	33	35.4	35.6	35.3	35.2	-1.00959
138	846	C	12	1	139	141	108.4	123.95	106.97	32.2	34.6	34.6	33.6	32.8	34.4	36.8	36.9	36.3	36.3	-0.85242
138	846	C	12	2	1	3	108.52	124.07	107.073	34.8	37.6	38.2	37.5	36.7	38.6	41	41	40.4	39.9	-0.512654
138	846	C	12	2	5	7	108.56	124.11	107.107	32.9	34.7	35	34.5	34	35.9	38.4	38.5	38	37.7	-0.763915
138	846	C	12	2	9	11	108.6	124.15	107.142	34.6	37.2	37.9	37.4	37.1	39.6	42.1	42.5	41.9	41.7	-0.540866
138	846	C	12	2	13	15	108.64	124.19	107.176	38.5	41.1	41.4	40.6	39.7	41.4	43.6	43.6	43	42.7	-0.0279603
138	846	C	12	2	17	19	108.68	124.23	107.21	39.8	41.8	41.8	40.7	39.6	41	43.1	43.1	42.3	41.9	0.142388
138	846	C	12	2	21	23	108.72	124.27	107.245	37.3	40.2	40.8	40.5	40.3	42.4	44.9	45.1	44.6	44.5	-0.187925
138	846	C	12	2	25	27	108.76	124.31	107.279	38	40.3	40.5	39.7	38.9	40.5	42.6	42.6	42.1	41.8	-0.0966286
138	846	C	12	2	29	31	108.8	124.35	107.313	33.9	36.7	37.6	37.4	37.3	40.2	42.9	43.3	43	43	-0.637746
138	846	C	12	2	33	35	108.84	124.39	107.348	36.9	39.6	40.2	39.7	39.3	41.4	43.9	44.1	43.5	43.1	-0.243418
138	846	C	12	2	37	39	108.88	124.43	107.382	35.1	38.2	39	38.9	38.9	41.4	43.9	44.2	44	43.6	-0.481504
138	846	C	12	2	41	43	108.92	124.47	107.415	32.4	35.3	36.5	36.8	37.4	40.9	43.9	44.4	44.2	44	-0.838167
138	846	C	12	2	45	47	108.96	124.51	107.449	37.9	40.8	41.4	40.9	40.5	42.5	44.7	44.9	44.5	43.8	-0.114457
138	846	C	12	2	49	51	109	124.55	107.483	37.9	40.2	40.7	40.3	39.8	41.6	43.9	44.2	43.7	43.6	-0.115387
138	846	C	12	2	53	55	109.04	124.59	107.517	36.7	39.2	39.7	39.4	39.2	41.6	44.1	44.4	43.9	44.2	-0.274422
138	846	C	12	2	57	59	109.08	124.63	107.55	39	41.6	42.2	41.7	41.1	42.9	45.1	45.3	45	44	0.0276795
138	846	C	12	2	61	63	109.12	124.67	107.584	33.7	36.8	37.9	38.1	38.6	41.9	45.1	45.9	45.6	45	-0.671541
138	846	C	12	2	65	67	109.16	124.71	107.618	32.5	35	35.7	35.6	35.6	38.2	41	41.8	41.8	41.3	-0.830576
138	846	C	12	2	69	71	109.2	124.75	107.652	33.7	36.3	36.9	36.4	36	38.3	40.8	40.9	40.5	40.3	-0.673403
138	846	C	12	2	73	75	109.24	124.79	107.685	34.1	36.7	37.2	36.9	36.6	38.9	41.4	41.6	41.5	40.8	-0.621632
138	846	C	12	2	77	79	109.28	124.83	107.719	33.8	35.8	36.3	35.8	35.3	37.3	39.7	40	39.9	39.4	-0.662089
138	846	C	12	2	81	83	109.32	124.87	107.752	35.4	37.6	38	37.5	37	38.9	41.4	41.5	41.1	40.7	-0.452215
138	846	C	12	2	85	87	109.36	124.91	107.786	35.1	38.6	39.5	39.1	38.7	41.1	43.6	43.8	43.4	43.2	-0.492671
138	846	C	12	2	89	91	109.4	124.95	107.818	34.6	37.2	37.8	37.2	36.5	38.5	40.8	41.1	40.8	40.7	-0.559478
138	846	C	12	2	93	95	109.44	124.99	107.85	30.3	32.8	33.8	33.7	33.9	37.1	40	40.6	40.5	40.5	-1.12695
138	846	C	12	2	97	99	109.48	125.03	107.882	32.2	34.7	35.5	35.3	35.3	38	40.7	41.1	40.9	40.6	-0.877546
138	846	C	12	2	101	103	109.52	125.07	107.915	34.6	37.5	38.4	38.3	38.2	40.9	43.5	43.7	43.5	43.1	-0.56227
138	846	C	12	2	105	107	109.56	125.11	107.947	36.3	39.2	40.2	40.1	40.1	42.7	45.2	45.6	45.2	44.9	-0.339221
138	846	C	12	2	109	111	109.6	125.15	107.98	36.8	39.7	40.8	40.9	41.1	44	46.6	46.9	46.7	46.4	-0.274275
138	846	C	12	2	113	115	109.64	125.19	108.013	37.6	40.7	41.8	42	42.2	44.9	47.3	47.8	47.2	46.9	-0.169803
138	846	C	12	2	117	119	109.68	125.23	108.047	36.9	39.9	41.1	41.3	41.6	44.7	47.3	47.7	47.4	47.4	-0.262961
138	846	C	12	2	121	123	109.72	125.27	108.081	39.4	42.4	43.4	43.2	43.1	45.3	47.6	47.9	47.3	46.9	0.0654909
138	846	C	12	2	125	127	109.76	125.31	108.114	41.5	44.9	46.2	46.4	46.8	49.4	51.8	52.1	51.5	51	0.341241
138	846	C	12	2	129	131	109.8	125.35	108.148	38.7	41.9	43.2	43.5	43.8	46.7	49.3	49.8	49.5	49.2	-0.0285973
138	846	C	12	2	133	135	109.84	125.39	108.181	40.9	43.9	45	45	45.2	47.7	50	50.3	49.9	49.5	0.260328
138	846	C	12	2	137	139	109.88	125.43	108.216	42.2	45.6	46.8	47	47.3	49.8	52.3	52.6	52.1	52.1	0.430677
138	846	C	12	2	141	143	109.92	125.47	108.249	41.4	44.4	45.3	45.1	45	47.2	49.4	49.5	48.7	48	0.324344
138	846	C	12	2	145	147	109.96	125.51	108.283	36.6	39.5	40.5	40.7	40.8	43.6	46.5	47	46.5	46.4	-0.309001
138	846	C	12	3	1	3	110.02	125.57	108.333	33.2	35.8	36.6	36.4	36.3	38.7	41.2	41.6	41.4	41.2	-0.758357
138	846	C	12	3	5	7	110.06	125.61	108.367	35.7	38.7	39.7	39.7	39.8	42.7	45.3	45.6	45.2	45	-0.429905
138	846	C	12	3	9	11	110.1	125.65	108.401	36.5	39.2	40	39.7	39.4	41.7	44.1	44.3	44	43.7	-0.325433
138	846	C	12	3	13	15	110.14	125.69	108.436	34.6	37.7	38.7	38.5	38.3	40.8	43.4	43.5	43	42.7	-0.576694
138	846	C	12	3	17	19	110.18	125.73	108.47	34.4	37.6	38.7	38.7	38.8	41.5	44.1	44.4	44.1	44.1	-0.603976
138	846	C	12	3	21	23	110.22	125.77	108.504	31.1	34.1	35.1	35.2	35.4	38.3	41.1	41.6	41.3	40.9	-1.03969
138	846	C	12	3	25	27	110.26	125.81	108.538	29.3	32.1	33	32.7	32.5	35.2	37.9	38.1	37.7	37.6	-1.27778
138	846	C	12	3	29	31	110.3	125.85	108.572	29.2	32.3	33.4	33.5	33.6	36.7	39.5	40	39.7	39.5	-1.29188
138	846	C	12	3	33	35	110.34	125.89	108.607	28	31.1	32.2	32.1	32.2	35.2	38.1	38.5	38.1	37.9	-1.45092
138	846	C	12	3	37	39	110.38	125.93	108.641	26.8	30	31.2	31.3	31.7	35.1	38.3	38.8	38.6	38.5	-1.60995
138	846	C	12	3	41	43	110.42	125.97	108.675	27.1	30.1	31.2	31.2	31.3	34.3	37.2	37.6	37.2	37.2	-1.57136
138	846	C	12	3	45	47	110.46	126.01	108.709	26.1	28.9	29.9	29.8	29.8	32.7	35.5	35.8	35.5	35.2	-1.70404
138	846	C	12	3	49	51	110.5	126.05	108.744	26.5	29.6	30.5	30.4	30.1	32.9	35.8	36	35.6	35.2	-1.65227
138	846	C	12	3	53	55	110.54	126.09	108.777	27.3	30.3	31.2	30.9	30.5	33.1	35.9	36	35.4	35.7	-1.5478
138	846	C	12	3	57	59	110.58	126.13	108.81	26.7	29.3	30	29.7	29.3	31.7	34.4	34.6	34.1	33.9	-1.62778
138	846	C	12	3	61	63	110.62	126.17	108.843	28.6	31.6	32.5	32.2	31.9	34.5	37.2	37.4	36.9	36.5	-1.37838
138	846	C	12	3	65	67	110.66	126.21	108.876	28.3	31.1	31.7	31.3	30.8	33.2	35.9	36.1	35.7	35.6	-1.41884
138	846	C	12	3	69	71	110.7	126.25	108.909	32.3	35.3	36	35.3	34.7	36.7	39.1	39.1	38.4	37.9	-0.892754
138	846	C	12	3	73	75	110.74	126.29	108.943	32.9	35.7	36.4	35.8	35.4	37.5	40	40.3	39.9	39.9	-0.814633
138	846	C	12	3	77	79	110.78	126.33	108.978	33.9	36.3	36.8	36.3	35.9	38	40.4	40.6	40.4	40.2	-0.683811
138	846	C	12	3	81	83	110.82	126.37	109.012	31.8	34.3	35.1	34.7	34.7	37.7	40.6	40.8	40.3	39.9	-0.961423
138	846	C	12	3	85	87	110.86	126.41	109.046	35.6	38.8	39.3	38.8	38.5	40.8	43.3	43.3	42.5	42.5	-0.461692
138	846	C	12	3	89	91	110.9	126.45	109.081	37.6	40.7	41.3	40.9	40.5	42.5	44.7	44.9	44.1	43.7	-0.199117
138	846	C	12	3	93	95	110.94	126.49	109.115	37.2	39.8	40.2	39.5	38.9	40.7	43	43	42.5	42.2	-0.252749
138	846	C	12	3	97	99	110.98	126.53	109.149	35.9	38.3	38.8	38.4	37.7	39.6	42	42.3	41.4	41.6	-0.424958
138	846	C	12	3	101	103	111.02	126.57	109.183	34.2	36.4	36.8	36	35.2	37	39.4	39.8	39.5	39.1	-0.649869
138	846	C	12	3	105	107	111.06	126.61	109.218	32.8	34.7	34.8	33.9	33.1	34.8	37.2	37.4	37.2	36.9	-0.835253
138	846	C	12	3	109	111	111.1	126.65	109.252	32.4	34.8	35	34.1	33.2	35	37.3	37.4	37	36.7	-0.888885
138	846	C	12	3	113	115	111.14	126.69	109.286	31.5	33.7	34.1	33.4	32.7	34.8	37.4	37.7	37.1	36.7	-1.00839
138	846	C	12	3	117	119	111.18	126.73	109.32	31.7	33.9	34.1	33.4	32.6	34.6	37	37.2	36.7	36.5	-0.982973
138	846	C	12	3	121	123	111.22	126.77	109.354	32.3	35	35.5	34.8	34.2	36.2	38.6	38.8	38.3	37.9	-0.904852
138	846	C	12	3	125	127	111.26	126.81	109.387	32.5	35	35.4	34.7	33.9	35.8	38.2	38.2	37.8	37.8	-0.879432
138	846	C	12	3	129	131	111.3	126.85	109.421	33.6	36.5	36.9	36.1	35.3	37.3	39.6	39.7	38.9	38.7	-0.735435
138	846	C	12	3	133	135	111.34	126.89	109.455	31.7	34.6	35	34.3	33.6	35.7	38.1	38	37.6	37.7	-0.986696
138	846	C	12	3	137	139	111.38	126.93	109.488	29.4	32	32.7	32.3	32	34.3	36.9	37	36.5	36.2	-1.29066
138	846	C	12	3	141	143	111.42	126.97	109.521	30	32.9	33.7	33.5	33.3	35.7	38.4	38.5	38.1	37.7	-1.21254
138	846	C	12	3	145	147	111.46	127.01	109.554	29.7	32	32.7	32.5	32.3	34.7	37.2	37.3	36.8	36.7	-1.25299
138	846	C	12	4	2	4	111.53	127.08	109.611	30.1	33	33.9	33.8	33.8	36.7	39.4	39.6	39.3	39.3	-1.20192
138	846	C	12	4	6	8	111.57	127.12	109.643	33.4	36.4	37.4	37.1	36.8	39.2	41.7	41.9	41.3	41.1	-0.768067
138	846	C	12	4	10	12	111.61	127.16	109.676	35.7	38.9	39.7	39.5	39.4	41.6	44	44.1	43.7	43	-0.465966
138	846	C	12	4	14	16	111.65	127.2	109.709	32.4	35.2	36.1	35.9	35.6	38.3	40.9	40.9	40.7	40	-0.901681
138	846	C	12	4	18	20	111.69	127.24	109.741	33.4	36.3	36.9	36.4	36.1	38.3	40.8	40.9	40.6	40	-0.770859
138	846	C	12	4	22	24	111.73	127.28	109.774	30.8	33.4	34	33.6	33.2	35.6	38.2	38.3	38	37.9	-1.11435
138	846	C	12	4	26	28	111.77	127.32	109.807	32.1	35.1	35.6	35	34.4	36.5	38.9	39	38.3	38.1	-0.943999
138	846	C	12	4	30	32	111.81	127.36	109.84	30.6	33.2	33.6	33	32.4	34.6	37.2	37.3	36.8	36.5	-1.14256
138	846	C	12	4	34	36	111.85	127.4	109.872	32.2	35.1	35.6	34.9	34.2	36.3	38.7	38.7	38	37.6	-0.932685
138	846	C	12	4	38	40	111.89	127.44	109.904	30.3	33	33.4	32.8	32.2	34.4	37	37	36.6	36.3	-1.18395
138	846	C	12	4	42	44	111.93	127.48	109.938	29.1	31.8	32.4	31.9	31.7	34.2	36.8	37.1	36.6	36.3	-1.34298
138	846	C	12	4	46	48	111.97	127.52	109.97	29.3	32.2	33.1	32.8	32.8	35.6	38.4	38.7	38.3	38	-1.31756
138	846	C	12	4	50	52	112.01	127.56	110.002	30.1	32.6	33	32.3	31.8	34	36.5	36.8	36.3	36	-1.21309
138	846	C	12	4	54	56	112.05	127.6	110.035	30.7	33	33.4	32.6	32.1	34.2	36.7	37	36.1	36.5	-1.13497
138	846	C	12	4	58	60	112.09	127.64	110.066	35.1	37.3	37.2	36.1	35.1	36.6	38.9	38.8	38.5	37.9	-0.556185
138	846	C	12	4	62	64	112.13	127.68	110.098	39.9	42.6	42.7	41.4	40	41.1	43.1	43.2	42.4	41.4	0.0752983
138	846	C	12	4	66	68	112.17	127.72	110.131	38.8	41.9	42.2	41.2	40.2	41.5	43.8	43.9	42.9	42.3	-0.0705605
138	846	C	12	4	70	72	112.21	127.76	110.162	38.3	40.6	41.1	40.4	39.7	41.6	43.8	43.9	43.5	43	-0.137368
138	846	C	12	4	74	76	112.25	127.8	110.195	36.9	39.3	39.8	39.1	38.5	40.4	42.8	43	42.5	42.3	-0.322752
138	846	C	12	4	78	80	112.29	127.84	110.227	42.2	45	45.3	44.3	43.4	44.9	46.9	46.9	46.2	45.7	0.374608
138	846	C	12	4	82	84	112.33	127.88	110.259	38.7	41	41.4	40.6	39.9	41.6	43.7	43.9	43.4	42.9	-0.0874582
138	846	C	12	4	86	88	112.37	127.92	110.291	37.9	40.6	41	40.3	39.6	41.4	43.7	43.9	43.3	43	-0.193791
138	846	C	12	4	90	92	112.41	127.96	110.322	34.3	36.7	37.1	36.6	36.1	38.2	40.6	40.9	40.6	40.4	-0.669032
138	846	C	12	4	94	96	112.45	128	110.353	35.1	37.1	37.4	36.7	36.1	38	40.4	40.7	40.3	40.1	-0.56456
138	846	C	12	4	98	100	112.49	128.04	110.384	38	40.4	40.6	39.7	38.7	40.4	42.5	42.6	42	41.8	-0.183408
138	846	C	12	4	102	104	112.53	128.08	110.416	39.6	42.3	42.6	41.6	40.6	42.1	44.2	44.2	43.5	43	0.0264664
138	846	C	12	4	106	108	112.57	128.12	110.448	41.4	44.2	44.6	43.7	42.7	44.2	46.3	46.2	45.5	45	0.262691
138	846	C	12	4	110	112	112.61	128.16	110.481	40.8	44.2	44.8	44.1	43.3	45	47.1	47.1	46.3	45.8	0.182709
138	846	C	12	4	114	116	112.65	128.2	110.513	38.5	41.6	42.4	41.8	41.3	43.2	45.5	45.5	44.9	44.3	-0.121254
138	846	C	12	4	118	120	112.69	128.24	110.546	36.7	39.9	40.5	40	39.6	41.4	43.6	43.6	43.1	42.4	-0.359339
138	846	C	12	4	122	124	112.73	128.28	110.579	38	41	41.7	41.2	40.8	42.8	45.1	45.3	44.6	44.3	-0.188991
138	846	C	12	4	126	128	112.77	128.32	110.611	39.2	41.9	42.7	42.4	42.2	44.3	46.5	46.7	46.3	46.1	-0.0318184
138	846	C	12	4	130	132	112.81	128.36	110.644	37.7	40.7	41.7	41.7	41.9	44.5	47	47.4	47.1	46.9	-0.230378
138	846	C	12	4	134	136	112.85	128.4	110.677	38.9	41.5	42.3	42.3	42.3	44.7	47.1	47.4	47.1	46.8	-0.0732055
138	846	C	12	4	138	140	112.89	128.44	110.709	39.4	42.2	42.9	42.9	42.9	45.2	47.5	47.9	47.5	47.4	-0.00825965
138	846	C	12	4	142	144	112.93	128.48	110.742	40.9	43.3	43.9	43.8	43.6	45.6	47.9	48.2	47.9	47.6	0.188439
138	846	C	12	4	146	148	112.97	128.52	110.774	41.1	44.6	45.4	45.2	45.1	47	49.2	49.4	48.8	48.3	0.213859
138	846	C	12	5	1	3	113.02	128.57	110.816	40.8	43.6	44.2	43.9	43.5	45.1	47	47.3	46.1	45.7	0.17317
138	846	C	12	5	5	7	113.06	128.61	110.848	39.1	41.8	42.6	42.4	42.3	44.3	46.4	46.5	45.8	45.4	-0.0517406
138	846	C	12	5	9	11	113.1	128.65	110.88	34.2	37.1	38.2	38.4	38.8	41.9	44.6	45.2	45	45	-0.69826
138	846	C	12	5	13	15	113.14	128.69	110.912	37.6	40.2	40.9	40.8	40.7	42.9	45.4	45.8	45.4	45.2	-0.251231
138	846	C	12	5	17	19	113.18	128.73	110.944	31.1	32.8	33.2	33.1	33.2	35.7	38.4	39	39.1	39.1	-1.10856
138	846	C	12	5	21	23	113.22	128.77	110.976	37.7	40.1	40.6	40.5	40.4	42.7	45.1	45.3	45.3	44.5	-0.239917
138	846	C	12	5	25	27	113.26	128.81	111.008	34.5	36.8	37.4	37.1	37.1	39.5	42	42.4	42.6	42.4	-0.662457
138	846	C	12	5	29	31	113.3	128.85	111.04	37.7	41.2	42.1	42.1	42.2	44.6	47	47.5	46.8	46.6	-0.241778
138	846	C	12	5	33	35	113.34	128.89	111.072	37.2	40.2	41.3	41.3	41.4	43.7	46.2	46.4	46	45.6	-0.308585
138	846	C	12	5	37	39	113.38	128.93	111.105	36.6	39.4	40.4	40.5	40.8	43.3	45.9	46.2	45.8	45.4	-0.388568
138	846	C	12	5	41	43	113.42	128.97	111.136	39.6	42.9	43.7	43.6	43.4	45.4	47.7	47.7	47.5	46.5	0.0057604
138	846	C	12	5	45	47	113.46	129.01	111.168	37.3	40.2	41	40.9	40.9	43.1	45.7	45.9	45.2	45.6	-0.298202
138	846	C	12	5	49	51	113.5	129.05	111.201	36.2	39.1	40.1	39.8	39.8	42.2	44.6	45	44.6	44.6	-0.444061
138	846	C	12	5	53	55	113.54	129.09	111.233	38.5	42.2	43.2	43	42.9	45.1	47.4	47.7	47.1	46.7	-0.14196
138	846	C	12	5	57	59	113.58	129.13	111.265	37	39.8	40.7	40.7	40.7	42.9	45.4	45.7	45.4	44.9	-0.34052
138	846	C	12	5	61	63	113.62	129.17	111.297	32.9	35.9	37	37.3	37.7	40.7	43.6	44.3	44.1	44	-0.881637
138	846	C	12	5	65	67	113.66	129.21	111.329	33.7	36.7	37.7	37.8	38.2	40.8	43.6	44	43.5	43.4	-0.777165
138	846	C	12	5	69	71	113.7	129.25	111.362	33.4	36.9	38.1	38.4	39.1	42.1	45	45.5	45.1	44.7	-0.817622
138	846	C	12	5	73	75	113.74	129.29	111.393	33	36.3	37.6	38.1	39	42.4	45.5	46.1	46.1	46	-0.871254
138	846	C	12	5	77	79	113.78	129.33	111.425	33.1	36.2	37.5	37.8	38.4	41.4	44.2	44.7	44.4	44.3	-0.859009
138	846	C	12	5	81	83	113.82	129.37	111.458	33.8	36.8	38.1	38.4	38.9	41.8	44.6	45.1	44.9	44.8	-0.767712
138	846	C	12	5	85	87	113.86	129.41	111.49	33.2	36.3	37.5	37.8	38.3	41.3	44.1	44.7	44.4	44.3	-0.847695
138	846	C	12	5	89	91	113.9	129.45	111.515	34.1	36.9	37.9	37.9	38	40.5	43.1	43.4	43.3	42.8	-0.730048
138	846	C	12	5	93	95	113.94	129.49	111.539	34	37.3	38.6	38.9	39.4	42.5	45.3	45.9	45.5	45.7	-0.744154
138	846	C	12	5	97	99	113.98	129.53	111.563	35	38.4	39.4	39.4	39.7	42.3	44.9	45.4	45.1	44.5	-0.613331
138	846	C	12	5	101	103	114.02	129.57	111.587	31.7	34.1	34.8	34.9	35	37.7	40.4	41	41.1	40.9	-1.04905
138	846	C	12	5	105	107	114.06	129.61	111.612	35.8	39	40	40.2	40.5	43	45.6	46	45.6	45.2	-0.50979
138	846	C	12	5	109	111	114.1	129.65	111.636	35.8	39.4	40.6	40.7	40.9	43.6	46.3	46.6	46	45.5	-0.510721
138	846	C	12	5	113	115	114.14	129.69	111.66	33.8	36.6	37.7	37.9	38.2	41.1	43.8	44.3	44.1	44	-0.775157
138	846	C	12	5	117	119	114.18	129.73	111.684	32.7	35.7	36.8	37.2	37.6	40.7	43.6	44.1	43.8	43.4	-0.921016
138	846	C	12	5	121	123	114.22	129.77	111.708	35	37.5	38.4	38.4	38.6	41	43.6	43.9	43.5	43	-0.618915
138	846	C	12	5	125	127	114.26	129.81	111.732	34.1	36.5	37.3	37.2	37.2	39.7	42.3	42.8	42.7	42.8	-0.738423
138	846	C	12	5	129	131	114.3	129.85	111.756	35	37.6	38.3	38.1	37.8	40	42.5	42.8	42.4	42	-0.620776
138	846	C	12	5	133	135	114.34	129.89	111.78	38.7	41.7	42.5	42.3	42.1	44.2	46.6	46.9	46.4	46.1	-0.134221
138	846	C	12	5	137	139	114.38	129.93	111.804	40.2	43.5	44.6	44.7	44.8	47.1	49.5	49.8	49.2	48.9	0.0624776
138	846	C	12	5	141	143	114.42	129.97	111.828	40.4	43.2	44.2	44.3	44.3	46.6	48.9	49.3	48.9	48.4	0.0878975
138	846	C	12	5	145	147	114.46	130.01	111.852	39.8	42.6	43.5	43.4	43.4	45.6	48	48.4	48.1	47.5	0.0079152
138	846	C	12	6	1	3	114.52	130.07	111.888	40.3	43.7	44.8	44.9	44.8	46.9	49.3	49.7	49.1	48.3	0.0723957
138	846	C	12	6	5	7	114.56	130.11	111.912	38	41	42	42.1	42.1	44.5	46.9	47.2	47.2	46.9	-0.231567
138	846	C	12	6	9	11	114.6	130.15	111.936	35.4	38.9	40.1	40.6	41.2	44.4	47.2	48.1	47.7	47.9	-0.575055
138	846	C	12	6	13	15	114.64	130.19	111.96	34.9	37.7	38.9	38.9	39.2	41.9	44.6	45.2	44.8	44.8	-0.641862
138	846	C	12	6	17	19	114.68	130.23	111.984	36.6	39.5	40.7	40.6	40.5	42.9	45.3	45.8	45.4	45	-0.418812
138	846	C	12	6	21	23	114.72	130.27	112.007	35.6	39	40	39.9	40	42.3	44.9	45.1	44.7	44.1	-0.551496
138	846	C	12	6	25	27	114.76	130.31	112.03	34.6	38	39.3	39.5	39.8	42.6	45.4	45.8	45.4	44.9	-0.684179
138	846	C	12	6	29	31	114.8	130.35	112.053	31.8	34.9	36	36	36.2	39.2	42	42.5	42.4	42.2	-1.05402
138	846	C	12	6	33	35	114.84	130.39	112.076	31.4	34	34.9	34.9	35	37.6	40.3	40.8	40.7	40.6	-1.10765
138	846	C	12	6	37	39	114.88	130.43	112.099	28.2	31	32.2	32.5	33.2	37	40.3	41.2	41.4	41.8	-1.53019
138	846	C	12	6	41	43	114.92	130.47	112.122	36.2	39.5	40.5	40.4	40.3	42.7	45.2	45.5	45	44.5	-0.477097
138	846	C	12	6	45	47	114.96	130.51	112.146	33.7	36.6	37.8	37.9	38.1	40.7	43.4	43.8	43.7	43.5	-0.80741
138	846	C	12	6	53	55	115.04	130.59	112.191	33.3	36.6	38	38.2	38.6	41.6	44.3	44.8	44.4	44	-0.861972
138	846	C	12	6	57	59	115.08	130.63	112.214	32.1	35.4	36.8	37	37.5	40.7	43.6	44.1	43.9	43.8	-1.02101
138	846	C	12	6	61	63	115.12	130.67	112.237	32.8	36	37.1	37.3	37.5	40.4	43	43.4	43.1	43	-0.92971
138	846	C	12	6	65	67	115.16	130.71	112.26	32.2	35.1	36.1	36.1	36.2	38.9	41.6	41.9	41.6	41.5	-1.00969
138	846	C	12	6	69	71	115.2	130.75	112.282	30.1	32.7	33.8	33.6	33.7	36.3	39.1	39.5	39.3	39.1	-1.2873
138	846	C	12	6	73	75	115.24	130.79	112.305	32.4	35.5	36.6	36.5	36.6	39.1	41.7	41.8	41.2	41.3	-0.985203
138	846	C	12	6	77	79	115.28	130.83	112.328	33.6	36.9	37.8	37.7	37.6	39.9	42.6	42.8	42.1	41.6	-0.82803
138	846	C	12	6	81	83	115.32	130.87	112.35	32.4	35.5	36.4	36.4	36.6	39.5	42.3	42.8	42.4	42	-0.987064
138	846	C	12	6	85	87	115.36	130.91	112.372	31	33.5	34.2	34.2	34.3	36.9	39.7	40.1	39.8	39.4	-1.17245
138	846	C	12	6	89	91	115.4	130.95	112.394	32.3	35.4	36.5	36.6	36.8	39.5	42.2	42.7	42.4	41.9	-1.0021
138	846	C	12	6	93	95	115.44	130.99	112.42	31.5	34.3	35.3	35.5	35.7	38.6	41.4	42	41.8	41.6	-1.10843
138	846	C	12	6	97	99	115.48	131.03	112.454	32.4	35.3	36.4	36.5	36.8	39.8	42.5	43.2	43.2	43.3	-0.990787
138	846	C	12	6	101	103	115.52	131.07	112.487	43.3	44.3	44.2	43.9	43.8	45.8	48.2	48.4	48	47.4	0.444389
138	846	C	12	6	105	107	115.56	131.11	112.521	42.5	43.3	43	42.7	42.4	44.1	46.3	46.3	45.8	45.5	0.338056
138	846	C	12	6	109	111	115.6	131.15	112.554	44.8	45.1	44.6	44.3	43.9	45.6	47.9	48	47.4	46.6	0.640157
138	846	C	12	6	113	115	115.64	131.19	112.588	44.1	44.2	43.6	43.2	43	44.8	47	47	46.6	45.9	0.547
138	846	C	12	6	117	119	115.68	131.23	112.62	42	42.7	42.2	41.8	41.5	43.4	45.8	45.8	45.1	44.8	0.269388
138	846	C	12	6	121	123	115.72	131.27	112.652	41.5	41.6	40.9	40.3	39.7	41.3	43.4	43.4	43.2	42.5	0.202581
138	846	C	12	6	125	127	115.76	131.31	112.685	40.8	41.3	40.9	40.5	40.3	42.4	44.8	44.9	44.4	43.8	0.109423
138	846	C	12	6	129	131	115.8	131.35	112.717	41.8	42.9	42.8	42.4	42.2	44.1	46.4	46.5	46	45.5	0.240246
138	846	C	12	6	133	135	115.84	131.39	112.75	42.6	43.7	43.5	43.1	42.8	44.6	46.8	46.8	46.4	46	0.344717
138	846	C	12	6	137	139	115.88	131.43	112.782	42	42.7	42.4	42.2	41.9	43.8	46.1	46.3	45.8	45.2	0.264735
138	846	C	12	6	141	143	115.92	131.47	112.815	41.8	42.7	42.3	41.8	41.5	43.3	45.5	45.7	45.2	44.5	0.237454
138	846	C	12	6	145	147	115.96	131.51	112.847	39.2	40.1	39.7	39.4	39.1	41.1	43.5	43.6	43.3	43.3	-0.106034
138	846	C	12	7	1	3	116.02	131.57	112.896	29.7	32.4	33.5	33.6	33.9	36.9	39.7	40.2	40.1	39.9	-1.35908
138	846	C	12	7	5	7	116.06	131.61	112.928	32.6	35.2	36.1	36.2	36.5	39.5	42.3	42.8	42.7	42.7	-0.97793
138	846	C	12	7	9	11	116.1	131.65	112.96	30.5	32.5	33.2	33.2	33.2	35.9	38.6	39.1	39.3	39.5	-1.25554
138	846	C	12	7	13	15	116.14	131.69	112.994	31.5	33.6	34.4	34.3	34.4	37.1	39.8	40.3	40.1	39.7	-1.12472
138	846	C	12	7	17	19	116.18	131.73	113.027	33.7	36.5	37.4	37.4	37.5	40	42.6	43	42.5	41.9	-0.835794
138	846	C	12	7	21	23	116.22	131.77	113.06	32.8	35.8	36.9	37	37.5	40.7	43.6	44.3	44.2	44	-0.955302
138	846	C	12	7	25	27	116.26	131.81	113.095	36.7	39.4	40.1	40	40	42.5	45.1	45.6	45.3	45.1	-0.442396
138	846	C	12	7	29	31	116.3	131.85	113.129	39.3	42	43	43	43	45.1	47.6	47.9	47.4	46.7	-0.100769
138	846	C	12	7	33	35	116.34	131.89	113.163	37.4	40.4	41.4	41.5	41.6	44	46.4	46.7	46.5	46.5	-0.35203
138	846	C	12	7	37	39	116.38	131.93	113.197	37.8	40.9	41.8	41.9	42	44.8	47.5	47.9	47.3	47	-0.30026
138	846	C	12	7	41	43	116.42	131.97	113.232	38.5	41.5	43	43.3	43.8	46.8	49.5	50	49.6	49.5	-0.208963
138	846	C	12	7	45	47	116.46	132.01	113.267	34.8	37.3	38.4	38.6	39.1	42.2	45.1	45.5	45.5	45.5	-0.69738
138	846	C	13	1	55	57	117.06	133.56	114.944	40.9	43.5	44.2	43.9	43.5	45.4	47.6	47.8	47.5	46.8	0.070252
138	846	C	13	1	59	61	117.1	133.6	114.983	40.3	43.3	44.5	44.4	44.3	46.8	49.2	49.5	49.2	48.4	-0.00973029
138	846	C	13	1	63	65	117.14	133.64	115.022	41.1	44.3	45.1	44.9	44.7	46.8	49	49.2	48.6	48	0.0947414
138	846	C	13	1	67	69	117.18	133.68	115.061	41.7	44.6	45.4	45.2	45	47.1	49.4	49.6	49.1	48.7	0.172863
138	846	C	13	1	71	73	117.22	133.72	115.1	37.4	40.5	41.6	41.7	41.9	44.4	47	47.4	47	46.8	-0.394605
138	846	C	13	1	75	77	117.26	133.76	115.138	37.7	40.5	41.5	41.7	41.9	44.5	46.9	47.3	47	46.5	-0.35601
138	846	C	13	1	79	81	117.3	133.8	115.178	38	41.1	42.1	42.1	42.1	44.4	46.8	47.1	46.6	46.3	-0.317415
138	846	C	13	1	83	85	117.34	133.84	115.217	35.1	38.4	40	40.5	41.2	44.5	47.3	48	47.9	47.8	-0.700429
138	846	C	13	1	87	89	117.38	133.88	115.255	31.9	35.2	36.6	37	37.6	41.2	44.2	45	44.9	44.6	-1.12297
138	846	C	13	1	91	93	117.42	133.92	115.293	32.8	35.7	37	37.2	37.7	40.9	43.7	44.3	44.3	43.9	-1.00532
138	846	C	13	2	1	3	118.02	134.52	115.857	38.2	40.9	42.1	42.6	43.3	46.3	49	49.6	49.5	49.5	-0.307815
138	846	C	13	2	5	7	118.06	134.56	115.894	39	42	43.1	43.6	44.2	46.9	49.4	50	50	49.8	-0.203344
138	846	C	13	2	9	11	118.1	134.6	115.932	39.4	42.5	43.8	44.1	44.5	47.3	49.9	50.3	50	49.7	-0.151573
138	846	C	13	2	13	15	118.14	134.64	115.969	39.7	42.8	44.1	44.7	45.2	48.1	50.7	51.3	51.3	51.2	-0.112978
138	846	C	13	2	17	19	118.18	134.68	116.006	40.3	43.1	44.2	44.5	44.9	47.4	49.9	50.3	50	49.8	-0.0348567
138	846	C	13	2	21	23	118.22	134.72	116.043	39.1	41.9	43	43.3	43.7	46.4	48.9	49.5	49.3	48.9	-0.193891
138	846	C	13	2	25	27	118.26	134.76	116.08	36	38.8	39.8	40	40.3	43.2	45.7	46.2	46.1	46	-0.603255
138	846	C	13	2	29	31	118.3	134.8	116.117	37.3	40.7	42	42.3	42.6	45.3	47.8	48.3	48	47.6	-0.432907
138	846	C	13	2	33	35	118.34	134.84	116.154	35	38.2	39.5	40	40.6	44.2	47.2	47.9	47.6	47.6	-0.736869
138	846	C	13	2	37	39	118.38	134.88	116.191	35.2	37.9	39.1	39.3	39.7	42.8	45.5	45.9	45.8	45.5	-0.711449
138	846	C	13	2	41	43	118.42	134.92	116.227	32.7	35.4	36.5	36.7	37	40.2	43.1	43.8	43.9	43.8	-1.04176
138	846	C	13	2	45	47	118.46	134.96	116.262	35.8	38.4	39.3	39.2	39.2	41.5	44	44.3	44	43.7	-0.634259
138	846	C	13	2	49	51	118.5	135	116.297	31.3	33.8	34.9	35.1	35.5	38.6	41.4	41.9	41.8	41.3	-1.22808
138	846	C	13	2	53	55	118.54	135.04	116.332	31.8	34.2	35.1	35.1	35.1	37.7	40.3	40.8	40.5	40.3	-1.16313
138	846	C	13	2	57	59	118.58	135.08	116.367	30.4	32.5	33	32.8	32.6	35.1	37.7	38	37.6	37.2	-1.34852
138	846	C	13	2	61	63	118.62	135.12	116.401	32.5	34.5	34.8	34.2	33.8	35.8	38.2	38.3	38	37.6	-1.07277
138	846	C	13	2	65	67	118.66	135.16	116.434	32.6	35	35.3	34.7	34.1	36	38.4	38.7	38.3	37.4	-1.06052
138	846	C	13	2	69	71	118.7	135.2	116.468	33.6	35.9	36.1	35.5	34.9	36.6	39	39.3	38.7	38.3	-0.929699
138	846	C	13	2	73	75	118.74	135.24	116.501	33.1	35.9	36.6	36.2	35.9	38.3	41	41.2	40.8	40.4	-0.996506
138	846	C	13	2	77	79	118.78	135.28	116.536	34.4	36.6	37.4	37	36.9	39	41.4	42	41.7	41	-0.826158
138	846	C	13	2	81	83	118.82	135.32	116.57	33.2	35.9	36.9	36.9	36.9	40.1	42.7	43.3	42.9	42.7	-0.985192
138	846	C	13	2	85	87	118.86	135.36	116.603	37.2	39.9	40.9	40.9	41.1	43.7	46.3	46.8	46.6	46.3	-0.459111
138	846	C	13	2	89	91	118.9	135.4	116.636	41	43.7	44.3	44.2	44.1	46.1	48.5	48.6	48.3	48	0.0406194
138	846	C	13	2	93	95	118.94	135.44	116.669	39.1	40.6	41.1	40.8	40.8	43	45.2	45.8	45.4	45.3	-0.210642
138	846	C	13	2	97	99	118.98	135.48	116.703	38.4	41.1	41.7	41.7	41.6	44.1	46.6	46.9	46.7	46.7	-0.303799
138	846	C	13	2	101	103	119.02	135.52	116.737	41.2	43.9	44.5	44.2	43.9	46.1	48.3	48.8	48.3	48.2	0.0641782
138	846	C	13	2	105	107	119.06	135.56	116.77	40.1	43.2	44.3	44.3	44.7	47.4	49.9	50.5	50	49.8	-0.0816806
138	846	C	13	2	109	111	119.1	135.6	116.803	35.7	37.8	38.3	38.2	38.3	40.6	43.2	43.8	43.7	43.7	-0.662324
138	846	C	13	2	113	115	119.14	135.64	116.835	38.3	41.3	42.2	42.3	42.5	44.9	47.5	47.7	47.7	47.1	-0.320697
138	846	C	13	2	117	119	119.18	135.68	116.868	35.9	38.7	39.9	40.2	40.7	43.8	46.5	47	47.1	47.2	-0.637835
138	846	C	13	2	121	123	119.22	135.72	116.902	37.8	40.9	42.1	42.5	42.8	45.6	48.4	48.7	48.3	48.8	-0.388435
138	846	C	13	2	125	127	119.26	135.76	116.934	36.6	39.3	40.6	41	41.5	44.4	47.1	47.6	47.7	46.8	-0.547469
138	846	C	13	2	129	131	119.3	135.8	116.967	35	38	39.6	40.1	40.9	44.4	47.2	48	47.8	47.9	-0.759204
138	846	C	13	2	133	135	119.34	135.84	116.999	37	40.3	41.5	41.9	42.4	45.2	47.8	48.4	48.1	47.7	-0.496629
138	846	C	13	2	137	139	119.38	135.88	117.031	36.9	40	41.2	41.4	41.7	44.5	47.1	47.4	47.1	46.9	-0.510735
138	846	C	13	2	141	143	119.42	135.92	117.063	35.8	38.7	40	40.4	40.9	44.2	47	47.5	47.3	47.3	-0.656593
138	846	C	13	2	145	147	119.46	135.96	117.095	39.2	41.8	42.9	43	43.2	45.5	48.1	48.4	48.1	47.9	-0.209564
138	846	C	13	3	1	3	119.52	136.02	117.142	33.5	36.1	37.2	37.5	37.9	40.9	43.6	44.2	44.3	44.2	-0.961952
138	846	C	13	3	5	7	119.56	136.06	117.174	33.5	36.5	37.7	38.1	38.6	42.1	44.9	45.5	45.4	45.2	-0.962882
138	846	C	13	3	9	11	119.6	136.1	117.205	37	40.5	42.1	42.5	43	46	48.7	49.2	48.8	47.9	-0.502678
138	846	C	13	3	13	15	119.64	136.14	117.236	36.7	40.2	41.6	42.1	42.5	45.3	48	48.2	48.2	47.4	-0.543134
138	846	C	13	3	17	19	119.68	136.18	117.265	34.9	37.8	38.9	39.4	39.9	42.8	45.7	46.1	45.6	46	-0.78122
138	846	C	13	3	21	23	119.72	136.22	117.295	33.2	35.9	36.9	37.2	37.6	40.4	43	43.4	43.2	43.1	-1.00613
138	846	C	13	3	25	27	119.76	136.26	117.325	34.6	38.1	39.5	40.1	41.1	44.6	47.5	48.2	48	47.8	-0.822607
138	846	C	13	3	29	31	119.8	136.3	117.353	32.9	35.9	37.2	37.9	38.7	41.9	45	45.6	45.3	44.9	-1.04752
138	846	C	13	3	33	35	119.84	136.34	117.382	31.6	33.9	34.9	35.1	35.4	38.3	41	41.6	41.6	41.7	-1.21973
138	846	C	13	3	37	39	119.88	136.38	117.411	31.8	34	34.9	35.2	35.6	38.5	41.3	41.9	42	42	-1.19431
138	846	C	13	3	41	43	119.92	136.42	117.44	34.8	37.7	38.9	39.1	39.4	42.4	45.1	45.6	45	44.6	-0.799979
138	846	C	13	3	45	47	119.96	136.46	117.469	35.8	39.1	40.3	40.4	40.8	43.7	46.3	46.8	46.6	46	-0.669157
138	846	C	13	3	49	51	120	136.5	117.5	36.7	40.1	41.1	41.3	41.5	44.2	46.7	47.1	46.7	46.5	-0.55151
138	846	C	13	3	53	55	120.04	136.54	117.53	34.8	37.7	39	39.2	39.7	42.6	45.4	45.8	45.6	45.4	-0.802771
138	846	C	13	3	57	59	120.08	136.58	117.562	32.6	35.2	36.3	36.3	36.5	39.2	41.9	42.4	42.2	42.2	-1.09356
138	846	C	13	3	61	63	120.12	136.62	117.593	36.8	39.9	40.8	40.9	41	43.3	45.8	46	45.5	45	-0.541126
138	846	C	13	3	65	67	120.16	136.66	117.625	32.3	35.4	36.7	37.1	37.7	41	43.9	44.4	44.2	44.1	-1.13494
138	846	C	13	3	69	71	120.2	136.7	117.659	37.6	40.2	41.2	41.2	41.3	43.9	46.2	46.4	46.4	46.4	-0.437585
138	846	C	13	3	73	75	120.24	136.74	117.691	38.3	40.9	41.8	41.9	42	44.4	46.9	47.4	47.1	46.7	-0.346289
138	846	C	13	3	77	79	120.28	136.78	117.724	39.6	42.8	44.3	44.4	44.8	47.6	50.2	50.7	50.1	50	-0.175941
138	846	C	13	3	81	83	120.32	136.82	117.757	35.6	39.1	40.7	41.2	42.2	46.2	49.2	50	49.9	49.4	-0.703883
138	846	C	13	3	85	87	120.36	136.86	117.79	40.8	44.5	45.9	46.4	47.2	50.4	53.1	53.6	53.1	52.5	-0.0196983
138	846	C	13	3	89	91	120.4	136.9	117.824	43.4	47.3	48.7	49.2	49.9	52.9	55.4	55.8	55.3	55.2	0.321929
138	846	C	13	3	93	95	120.44	136.94	117.858	43.1	47.2	48.6	49.2	49.9	52.7	55.3	55.6	55.3	54.6	0.281472
138	846	C	13	3	97	99	120.48	136.98	117.892	42.5	46.2	47.5	47.9	48.4	51.3	53.8	54.2	53.9	53.3	0.20149
138	846	C	13	3	101	103	120.52	137.02	117.926	38	41.4	42.8	43.2	43.8	47.1	49.7	50.2	50	49.4	-0.392329
138	846	C	13	3	105	107	120.56	137.06	117.959	39.2	42.9	44.5	45.1	46.1	50	52.9	53.7	53.7	53.2	-0.235156
138	846	C	13	3	109	111	120.6	137.1	117.995	42.8	46.2	47.7	48.2	48.7	51.8	54.4	55	54.7	54.6	0.238224
138	846	C	13	3	113	115	120.64	137.14	118.035	38.8	42.2	43.8	44.1	44.5	48.1	51	51.6	51.3	51	-0.289718
138	846	C	13	3	117	119	120.68	137.18	118.074	42	44.6	45.6	45.6	45.8	48.3	50.7	51.2	51.1	51	0.13096
138	846	C	13	3	121	123	120.72	137.22	118.113	44.9	48.3	49.2	49.3	49.4	51.6	53.8	54	53.5	53	0.512113
138	846	C	13	3	125	127	120.76	137.26	118.152	45	48	48.8	48.8	48.6	50.6	52.7	52.9	52.4	52	0.524358
138	846	C	13	3	129	131	120.8	137.3	118.191	45.7	48.8	49.6	49.2	48.7	50.4	52.4	52.5	51.8	51.1	0.615654
138	846	C	13	3	133	135	120.84	137.34	118.23	43.7	47	48	47.8	47.6	49.7	51.9	52.1	51.5	50.9	0.351218
138	846	C	13	3	137	139	120.88	137.38	118.269	43.1	46.5	47.6	47.6	47.6	49.9	52.1	52.4	51.7	51.2	0.271235
138	846	C	13	3	141	143	120.92	137.42	118.308	43.5	46.4	47.3	47.2	47	49.2	51.5	51.7	51.2	50.8	0.323006
138	846	C	13	3	145	147	120.96	137.46	118.347	43.9	46.8	47.6	47.4	47.1	49.1	51.3	51.5	50.9	50.4	0.374777
138	846	C	13	4	1	3	121.02	137.52	118.406	41.6	44.6	45.5	45.3	45	47.2	49.5	49.8	49.1	48.5	0.070349
138	846	C	13	4	5	7	121.06	137.56	118.444	42.9	45.9	46.6	46.1	45.5	47.4	49.6	49.6	48.7	48	0.240697
138	846	C	13	4	9	11	121.1	137.6	118.483	42	45.1	46.1	45.8	45.5	47.6	49.7	50	49.3	48.5	0.121189
138	846	C	13	4	13	15	121.14	137.64	118.524	41	43.8	44.9	44.8	44.7	47	49.3	49.5	49.1	48.7	-0.0114945
138	846	C	13	4	17	19	121.18	137.68	118.565	41.7	44.8	45.7	45.7	45.5	47.9	50.3	50.5	49.9	49.4	0.0798019
138	846	C	13	4	21	23	121.22	137.72	118.606	40.3	43.3	44.4	44.2	44	46.4	48.9	49.1	48.7	48	-0.105583
138	846	C	13	4	25	27	121.26	137.76	118.646	39.7	42.6	43.4	43.3	43.1	45.6	47.9	48.2	47.7	47.9	-0.185565
138	846	C	13	4	29	31	121.3	137.8	118.687	46.5	49.5	50	49.3	48.3	49.7	51.5	51.6	50.8	50.3	0.709424
138	846	C	13	4	33	35	121.34	137.84	118.729	45.9	48.9	49.8	49.5	49	50.7	52.6	52.7	52.2	51.7	0.629442
138	846	C	13	4	37	39	121.38	137.88	118.769	45	47.7	48.5	48.3	48	50	52.1	52.3	52.1	51.7	0.509933
138	846	C	13	4	41	43	121.42	137.92	118.81	46.1	49.5	50.5	50.2	49.9	51.9	53.8	53.9	53.5	52.9	0.653931
138	846	C	13	4	45	47	121.46	137.96	118.851	45.3	47.9	48.9	48.7	48.5	50.4	52.5	52.7	52.2	52	0.547598
138	846	C	13	4	49	51	121.5	138	118.892	45.6	48.2	49	48.7	48.4	50.5	52.5	52.6	52.3	51.6	0.586193
138	846	C	13	4	53	55	121.54	138.04	118.932	46.7	49.7	50.4	50.2	49.9	51.8	53.8	53.9	53.3	52.9	0.730191
138	846	C	13	4	57	59	121.58	138.08	118.973	45.4	47.5	48.2	47.8	47.6	49.4	51.4	51.7	51.1	50.8	0.557982
138	846	C	13	4	61	63	121.62	138.12	119.015	43.5	45.9	46.4	46.2	45.9	47.9	50	50.4	50	49.5	0.30672
138	846	C	13	4	65	67	121.66	138.16	119.055	44.2	46.9	47.5	47.2	46.8	48.6	50.7	51	50.4	49.9	0.398017
138	846	C	13	4	69	71	121.7	138.2	119.096	43.6	45.9	46.4	46.1	45.7	47.4	49.5	49.9	49.4	49	0.318034
138	846	C	13	4	73	75	121.74	138.24	119.137	43.5	46.4	46.9	46.3	45.7	47.2	49.2	49.3	48.5	48	0.303929
138	846	C	13	4	77	79	121.78	138.28	119.177	36.2	38.2	38.6	37.9	37.3	39.3	41.6	41.8	41.2	41.5	-0.658798
138	846	C	13	4	81	83	121.82	138.32	119.212	36.6	39	39.3	38.7	38.1	39.9	42.3	42.2	42.2	41.8	-0.607028
138	846	C	13	4	85	87	121.86	138.36	119.246	34.9	38	38.3	37.9	37.2	39.3	41.6	41.7	41.2	40.7	-0.831938
138	846	C	13	4	89	91	121.9	138.4	119.28	33.9	36.4	36.9	36.3	35.6	37.7	40.1	40.3	39.6	39.3	-0.964622
138	846	C	13	4	93	95	121.94	138.44	119.314	32.6	35	35.5	34.9	34.5	36.8	39.3	39.3	38.7	38.4	-1.13683
138	846	C	13	4	97	99	121.98	138.48	119.348	32.2	34.4	34.9	34.4	34	36.2	38.6	39.1	38.4	38.4	-1.19046
138	846	C	13	4	101	103	122.02	138.52	119.381	34.5	36.8	37	36.5	36	37.8	40.2	40.5	40	39.6	-0.888362
138	846	C	13	4	105	107	122.06	138.56	119.415	35.8	38.2	38.6	38.2	37.8	39.9	42.3	42.6	42.2	41.7	-0.718014
138	846	C	13	4	109	111	122.1	138.6	119.449	39.5	41.9	42.2	41.7	41.1	42.7	44.9	45.2	44.6	44	-0.231458
138	846	C	13	4	113	115	122.14	138.64	119.482	40.9	42.6	42.8	42.2	41.7	43.2	45.3	45.5	45.5	44.7	-0.047935
138	846	C	13	4	117	119	122.18	138.68	119.517	49.3	51.8	52.2	51.5	50.6	51.8	53.7	53.6	52.7	52.1	1.05786
138	846	C	13	4	121	123	122.22	138.72	119.55	43.1	44.6	44.7	44.2	43.7	45.2	47.3	47.7	47.3	46.9	0.24006
138	846	C	13	4	125	127	122.26	138.76	119.584	47.2	49.1	49.2	48.8	48.1	49.4	51.2	51.2	51	50	0.779316
138	846	C	13	4	129	131	122.3	138.8	119.62	45.8	48.4	48.6	47.8	47	48.2	50	50.1	49.3	48.6	0.593932
138	846	C	13	4	133	135	122.34	138.84	119.656	44.2	46.2	46.8	46.5	46.3	48.2	50.3	50.6	50.3	49.5	0.382197
138	846	C	13	4	137	139	122.38	138.88	119.693	46.8	49.4	49.5	48.5	47.3	48.3	50	50.2	49.4	48.8	0.723823
138	846	C	13	4	141	143	122.42	138.92	119.728	42.9	44.6	44.9	44.4	44	45.7	47.8	48.1	48	47.1	0.209057
138	846	C	13	4	145	147	122.46	138.96	119.764	48.3	50.4	50.6	49.5	48.3	49.1	50.9	51	50.1	49.5	0.919592
138	846	C	13	5	1	3	122.52	139.02	119.818	46.6	48.6	48.6	47.8	46.8	47.9	49.9	50.1	49.5	48.8	0.694216
138	846	C	13	5	5	7	122.56	139.06	119.854	44.3	46.4	46.1	45	43.8	44.9	46.8	46.9	46.3	45.8	0.390253
138	846	C	13	5	9	11	122.6	139.1	119.89	44.6	46.9	46.9	45.6	44	45.1	47	46.6	46.1	45.5	0.428849
138	846	C	13	5	13	15	122.64	139.14	119.926	41.1	43	42.7	41.5	40.1	41.2	43.2	43.3	42.7	42.2	-0.033217
138	846	C	13	5	17	19	122.68	139.18	119.961	41.8	43.9	44	43.4	42.6	44.1	46.3	46.5	46	45.4	0.0580794
138	846	C	13	5	21	23	122.72	139.22	119.996	45	47.3	47.2	45.9	44.5	45.4	47.2	47.4	46.4	46.1	0.478758
138	846	C	13	5	25	27	122.76	139.26	120.031	41.9	43.4	43.9	43.4	42.9	44.4	46.5	47	46.2	45.4	0.0693935
138	846	C	13	5	29	31	122.8	139.3	120.067	45.4	47.7	48.1	47.4	46.5	47.7	49.6	49.7	49	47.9	0.529598
138	846	C	13	5	33	35	122.84	139.34	120.102	43.3	45.5	46	45.5	45.1	46.6	48.8	49.1	48.4	48.5	0.251986
138	846	C	13	5	37	39	122.88	139.38	120.138	43.9	45.9	46.1	45.3	44.6	46	47.8	48.1	47.5	47	0.330107
138	846	C	13	5	41	43	122.92	139.42	120.175	45.3	47.7	48	47.1	46.1	47.3	49.1	49.4	48.4	48.1	0.513631
138	846	C	13	5	45	47	122.96	139.46	120.216	44.8	46.7	46.9	46.5	46	47.4	49.5	49.8	49.1	48.8	0.446824
138	846	C	13	5	49	51	123	139.5	120.255	46.9	49.3	49.5	49	48.3	49.6	51.5	51.6	51	50.2	0.722574
138	846	C	13	5	53	55	123.04	139.54	120.296	42	44.2	44.8	44.8	44.9	47.1	49.4	49.9	49.7	49.2	0.0760545
138	846	C	13	5	57	59	123.08	139.58	120.337	43	45.9	46.8	46.7	46.6	48.7	51.1	51.4	50.8	50.4	0.206877
138	846	C	13	5	61	63	123.12	139.62	120.376	40.9	43.2	43.8	43.3	42.9	44.8	46.9	47.2	46.6	46.3	-0.0707348
138	846	C	13	5	65	67	123.16	139.66	120.418	38.6	40.8	41.1	40.6	40.3	42.2	44.5	44.8	44.4	44.2	-0.374697
138	846	C	13	5	69	71	123.2	139.7	120.458	35.4	37.6	38.2	37.9	37.7	40.1	42.6	43.1	42.8	42.8	-0.797237
138	846	C	13	5	73	75	123.24	139.74	120.499	35	36.8	37.2	37.2	37.1	39.5	42	42.3	42.1	41.5	-0.850869
138	846	C	13	5	77	79	123.28	139.78	120.538	35.9	38.2	38.9	38.4	37.9	40	42.4	42.6	42.3	41.6	-0.733222
138	846	C	13	5	81	83	123.32	139.82	120.577	36.9	39.2	39.4	38.6	37.7	39.3	41.5	41.6	41.2	40.5	-0.602399
138	846	C	13	5	85	87	123.36	139.86	120.617	36.8	38.8	39.1	38.4	37.6	39.3	41.7	41.8	41.2	40.7	-0.616505
138	846	C	13	5	89	91	123.4	139.9	120.656	35.6	37.1	37.3	36.5	36	37.7	40.1	40.2	40	39.5	-0.775539
138	846	C	13	5	93	95	123.44	139.94	120.695	38.8	41.5	41.8	41.3	40.7	42.5	44.8	45	44.7	43.7	-0.354861
138	846	C	13	5	97	99	123.48	139.98	120.731	39.7	41.8	42.1	41.6	41.2	42.9	45.2	45.4	45.1	44.3	-0.237214
138	846	C	13	5	101	103	123.52	140.02	120.768	43.6	46	46.3	45.6	44.9	46.1	48.2	48.3	47.9	47	0.275692
138	846	C	13	5	105	107	123.56	140.06	120.804	43	45.3	45.4	44.9	44.2	45.7	47.9	48.2	47.3	47.3	0.19571
138	846	C	13	5	109	111	123.6	140.1	120.841	47.1	49.4	49.8	48.9	48.1	49.3	51.2	51.3	50.7	49.8	0.734966
138	846	C	13	5	113	115	123.64	140.14	120.876	46.3	48.5	48.6	47.6	46.6	47.8	49.7	49.8	49.1	48.5	0.628633
138	846	C	13	5	117	119	123.68	140.18	120.913	43.6	46	46.4	45.8	45.2	46.9	49.1	49.4	48.9	48.4	0.271969
138	846	C	13	5	121	123	123.72	140.22	120.949	47.5	49.4	49.3	48.1	46.8	47.7	49.5	49.5	48.7	48	0.784875
138	846	C	13	5	125	127	123.76	140.26	120.983	45.5	47.5	47.8	47.1	46.4	47.9	49.9	50	49.4	48.8	0.520439
138	846	C	13	5	129	131	123.8	140.3	121.018	49.6	52.2	52.1	50.8	49.2	49.8	51.4	51.4	50.3	49.6	1.0597
138	846	C	13	5	133	135	123.84	140.34	121.052	47.8	50.7	51	49.8	48.6	49.5	51.3	51.3	50.4	49.6	0.821609
138	846	C	13	5	137	139	123.88	140.38	121.087	47.4	50	50.2	49	47.7	48.7	50.5	50.5	49.9	49.1	0.767977
138	846	C	13	5	141	143	123.92	140.42	121.121	41.6	43.9	44.5	44.1	43.8	45.9	48.3	48.7	48.5	47.7	0.00288004
138	846	C	13	5	145	147	123.96	140.46	121.157	45.2	47.1	47	46.1	45.1	46.4	48.3	48.5	47.9	47.2	0.47626
138	846	C	13	6	1	3	124.02	140.52	121.208	47.6	49.6	49.1	47.5	45.8	46.4	47.9	47.8	46.7	45.6	0.791071
138	846	C	13	6	5	7	124.06	140.56	121.243	48.9	51.1	50.8	49.1	47.2	47.7	49.2	49	48	46.9	0.961419
138	846	C	13	6	9	11	124.1	140.6	121.277	45.9	48.3	48.3	47.1	45.9	47	48.8	48.8	48.2	47.3	0.56523
138	846	C	13	6	13	15	124.14	140.64	121.312	37.8	38.2	37.8	37.1	36.5	38.2	40.5	40.7	40.4	40.2	-0.502899
138	846	C	13	6	17	19	124.18	140.68	121.346	42.1	43.4	43	41.8	40.5	41.7	43.5	43.5	42.8	42	0.0627075
138	846	C	13	6	21	23	124.22	140.72	121.381	41.3	43.6	43.8	43	42.3	44	46.1	46.3	45.9	45.4	-0.0436254
138	846	C	13	6	25	27	124.26	140.76	121.418	43.4	46.1	46.5	45.8	45	46.6	48.6	48.5	47.7	46.7	0.232125
138	846	C	13	6	29	31	124.3	140.8	121.454	44.4	46.5	46.7	46	45.2	46.7	48.7	48.9	48.3	47.7	0.362947
138	846	C	13	6	33	35	124.34	140.84	121.491	48.4	51.2	51.5	50.4	49.2	50.2	52	52	51.1	50.2	0.889028
138	846	C	13	6	37	39	124.38	140.88	121.526	45.6	47.2	47.2	46.4	45.6	47.1	49.1	49.4	48.9	48.1	0.51919
138	846	C	13	6	41	43	124.42	140.92	121.563	44.2	45.7	45.7	44.9	44.3	45.8	47.9	48.2	48	47.8	0.333805
138	846	C	13	6	45	47	124.46	140.96	121.599	49.3	51.6	51.4	50.4	49.1	50	51.8	51.7	51.1	50.3	1.00481
138	846	C	13	6	49	51	124.5	141	121.635	50	52.7	52.9	51.9	50.7	51.8	53.5	53.3	52.8	51.6	1.09611
138	846	C	13	6	53	55	124.54	141.04	121.671	50.4	52.4	52.4	51.5	50.3	51.2	52.8	52.7	51.8	51.1	1.14788
138	846	C	13	6	57	59	124.58	141.08	121.707	45.5	47.4	47.5	46.8	46.1	47.6	49.5	49.7	49.3	48.6	0.501361
138	846	C	13	6	61	63	124.62	141.12	121.744	51.3	53.6	53.5	52.2	50.8	51.6	53.2	53.1	52.3	51.3	1.2646
138	846	C	13	6	65	67	124.66	141.16	121.779	45.4	46.6	46.3	45.3	44.2	45.4	47.3	47.5	46.9	46.4	0.486325
138	846	C	13	6	69	71	124.7	141.2	121.816	43	44.2	44.2	43.5	42.9	44.6	46.7	47	46.9	46.4	0.169187
138	846	C	13	6	73	75	124.74	141.24	121.852	52.5	54.7	54.7	53.6	52.4	53.2	54.8	54.8	54.1	53.3	1.41991
138	846	C	13	6	77	79	124.78	141.28	121.888	50.2	52.3	52.5	51.7	51	52.2	54	54	53.2	52.2	1.11595
138	846	C	13	6	81	83	124.82	141.32	121.924	47.6	49.4	49.5	48.7	47.9	49.3	51.2	51.4	50.7	50.3	0.772459
138	846	C	13	6	85	87	124.86	141.36	121.96	45.2	46.9	46.9	46	45.3	46.9	48.9	49.1	48.6	48.1	0.455321
138	846	C	13	6	89	91	124.9	141.4	121.995	45.2	47	47.1	46.6	46.1	47.9	50	50.4	50	49.7	0.454391
138	846	C	13	6	93	95	124.94	141.44	122.027	48.6	50.3	50.3	49.6	48.9	50.3	52.3	52.5	52.1	51.8	0.90142
138	846	C	13	6	97	99	124.98	141.48	122.061	50.7	52.7	52.9	52.3	51.5	52.8	54.7	54.8	54.2	53.4	1.17717
138	846	C	13	6	101	103	125.02	141.52	122.093	55.3	57.8	57.8	56.7	55.5	56.3	57.6	57.4	56.6	56.1	1.7823
138	846	C	13	6	105	107	125.06	141.56	122.123	47.4	49.2	49.2	48.5	47.7	48.9	50.8	51.1	50.8	50	0.740525
138	846	C	13	6	109	111	125.1	141.6	122.153	46.9	48.5	48.6	47.8	47	48.5	50.3	50.6	50.3	49.6	0.673717
138	846	C	13	6	113	115	125.14	141.64	122.183	54.1	56.3	56.1	54.7	53.1	53.4	54.8	54.7	54	53.4	1.62141
138	846	C	13	6	117	119	125.18	141.68	122.213	54.3	56.6	56.5	55	53.3	53.7	55	54.9	53.8	53	1.64683
138	846	C	13	6	121	123	125.22	141.72	122.242	49.1	51.9	52.2	51.3	50.3	51.3	53.1	53.1	52.3	51.6	0.960782
138	846	C	13	6	125	127	125.26	141.76	122.272	50.6	52.9	53.1	52.4	51.4	52.4	54.2	54.2	53.5	53.1	1.15748
138	846	C	13	6	129	131	125.3	141.8	122.302	44.4	46.5	46.6	45.7	44.8	46.2	48.1	48.4	47.9	47.6	0.339682
138	846	C	13	6	133	135	125.34	141.84	122.332	46.3	48.2	48.2	47.1	46	47.2	49.2	49.3	48.7	48.2	0.589082
138	846	C	13	6	137	139	125.38	141.88	122.361	44.6	46.9	46.8	45.5	44.1	45	47	47	46.2	45.5	0.364172
138	846	C	13	6	141	143	125.42	141.92	122.391	43.9	46.3	46.2	45.1	43.9	45	47	47.1	46.5	46.1	0.271014
138	846	C	13	6	145	147	125.46	141.96	122.42	41.5	43.8	44	43.1	42	43.5	45.6	45.7	45.2	44.8	-0.0461236
138	846	C	13	7	1	3	125.52	142.02	122.465	42.5	45.3	45.9	45.4	44.8	46.7	48.8	48.9	48.2	47.6	0.0842334
138	846	C	13	7	5	7	125.56	142.06	122.494	42.8	45.4	46	45.6	45.1	47.1	49.1	49.2	48.6	48.3	0.122829
138	846	C	13	7	9	11	125.6	142.1	122.523	42.5	44.8	45.2	44.7	44.1	45.9	48	48.1	47.6	46.9	0.0823722
138	846	C	13	7	13	15	125.64	142.14	122.552	44.7	47.9	48.7	48.3	47.8	49.6	51.7	51.7	51	50.1	0.371298
138	846	C	13	7	17	19	125.68	142.18	122.581	44.8	47.9	48.8	48.3	47.6	49.2	51.2	51.3	50.9	50.3	0.383543
138	846	C	13	7	21	23	125.72	142.22	122.611	44.9	48.3	49.1	48.4	47.6	49.4	51.6	51.6	50.3	49.9	0.395787
138	846	C	13	7	25	27	125.76	142.26	122.639	45.8	48.7	49.3	48.4	47.4	48.7	50.7	50.5	49.8	49.1	0.513434
138	846	C	13	7	29	31	125.8	142.3	122.668	42.8	45.6	46.2	45.6	45	46.9	49.1	49.3	48.8	48.2	0.117245
138	846	C	13	7	33	35	125.84	142.34	122.697	40.9	43.2	43.6	43.2	42.7	44.7	47	47.4	46.9	46.7	-0.134016
138	846	C	13	7	37	39	125.88	142.38	122.726	44.4	46.6	47	46.4	45.6	47.1	49.1	49.4	48.7	47.9	0.326188
138	846	C	13	7	41	43	125.92	142.42	122.754	45.8	48.4	48.6	47.8	46.6	47.8	49.7	49.9	49.2	48.6	0.509712
138	846	C	13	7	45	47	125.96	142.46	122.782	43	44.9	45	44.2	43.2	44.6	46.8	47.2	47	46.6	0.139873
138	846	C	13	7	49	51	126	142.5	122.81	42.4	44.4	44.7	44	43.5	45.2	47.2	47.6	47.3	46.7	0.0598908
138	846	C	14	1	8	10	126.09	144.49	124.827	33.5	36	36.6	35.9	35.2	37.2	39.7	40	39.6	39.8	-1.15901
138	846	C	14	1	12	14	126.13	144.53	124.865	34.4	36.9	37.2	36.5	35.8	37.9	40.5	40.8	40.6	40.9	-1.04136
138	846	C	14	1	16	18	126.17	144.57	124.904	32.8	35	34.9	34	33	34.8	37.2	37.3	37	37.6	-1.2531
138	846	C	14	1	20	22	126.21	144.61	124.944	29.7	31.8	32	30.9	29.9	31.9	34.6	34.6	34.1	34.9	-1.66246
138	846	C	14	1	24	26	126.25	144.65	124.982	30.4	32.4	32.9	32.2	31.4	33.6	36.4	36.9	36.4	36.2	-1.57116
138	846	C	14	1	28	30	126.29	144.69	125.021	32.1	34.3	34.7	33.8	32.9	34.8	37.3	37.6	37.3	37.5	-1.34811
138	846	C	14	1	32	34	126.33	144.73	125.06	33.8	36.3	36.6	35.6	34.8	36.8	39.1	39.3	39.1	39.3	-1.12507
138	846	C	14	1	36	38	126.37	144.77	125.1	36.6	39	39.2	38.3	37.5	39.5	41.8	42	41.7	41.7	-0.757088
138	846	C	14	1	40	42	126.41	144.81	125.138	37	39.8	40.5	39.8	39.2	41.5	44	44.2	43.9	44.2	-0.705317
138	846	C	14	1	44	46	126.45	144.85	125.177	44.7	47.3	47.5	46.4	45.2	46.6	48.5	48.6	48.3	48.2	0.308249
138	846	C	14	1	48	50	126.49	144.89	125.216	44.7	46.7	46.7	45.8	44.7	46	47.8	48.2	48	47.9	0.307319
138	846	C	14	1	52	54	126.53	144.93	125.254	46.6	48.8	48.8	47.7	46.4	47.5	49.3	49.4	49.1	49.4	0.556719
138	846	C	14	1	56	58	126.57	144.97	125.294	47.8	50.2	50.6	49.7	48.6	49.6	51.5	51.9	51.4	50.5	0.713891
138	846	C	14	1	60	62	126.61	145.01	125.333	51.8	54.1	54.2	52.8	51.1	51.5	53.1	53.2	52.5	51.9	1.23997
138	846	C	14	1	64	66	126.65	145.05	125.371	52.7	54.8	54.3	52.4	50.2	50.4	51.8	51.8	51.3	51	1.35762
138	846	C	14	1	68	70	126.69	145.09	125.41	47.7	49.4	49.1	47.8	46.3	47	48.7	48.7	48.4	48.5	0.697924
138	846	C	14	1	72	74	126.73	145.13	125.45	44.5	46.2	46.1	45	43.7	44.8	46.9	47.4	47.1	46.2	0.275385
138	846	C	14	1	76	78	126.77	145.17	125.489	43.7	45.2	44.9	43.6	42.2	43.2	45.1	45.2	45	44.9	0.169052
138	846	C	14	1	80	82	126.81	145.21	125.527	41.7	43.3	43.2	41.8	40.6	41.9	43.9	43.9	43.8	44.4	-0.0953848
138	846	C	14	1	84	86	126.85	145.25	125.566	41.9	44	43.9	42.8	41.7	43	44.9	45.1	45.2	44.7	-0.0699648
138	846	C	14	1	88	90	126.89	145.29	125.603	40.6	43	43.5	42.6	41.7	43.3	45.6	45.9	45.4	45.4	-0.242174
138	846	C	14	1	92	94	126.93	145.33	125.639	38.4	40.8	41.4	40.9	40.5	43	45.5	45.9	45.6	46.1	-0.532961
138	846	C	14	1	96	98	126.97	145.37	125.674	39.5	42.6	43.3	42.9	42.5	44.6	47	47	46.5	46.9	-0.388964
138	846	C	14	1	100	102	127.01	145.41	125.706	38.8	41.7	42.4	41.9	41.2	43.3	45.7	45.9	45.3	45.1	-0.482121
138	846	C	14	1	104	106	127.05	145.45	125.737	33	36.1	37.3	37.3	37.3	40.2	42.9	43.4	43	42.7	-1.24722
138	846	C	14	1	108	110	127.09	145.49	125.768	29.3	32.4	33.6	33.7	33.7	36.6	39.4	39.9	39.8	40.1	-1.73563
138	846	C	14	1	112	114	127.13	145.53	125.8	27.2	29.9	30.9	30.9	30.9	33.8	36.8	37.2	37.1	37.1	-2.01325
138	846	C	14	1	116	118	127.17	145.57	125.831	29.6	32.6	33.6	33.6	33.5	36.2	38.9	39.3	39.1	39.3	-1.69797
138	846	C	14	1	120	122	127.21	145.61	125.862	28.3	31.5	32.4	32.4	32.3	35.1	38.2	38.7	38.3	38.2	-1.87018
138	846	C	14	1	124	126	127.25	145.65	125.893	27.7	31	31.9	31.8	31.8	34.5	37.3	37.6	37.3	37.6	-1.95016
138	846	C	14	1	128	130	127.29	145.69	125.924	26.7	29	29.6	29.1	28.7	31.2	33.9	34.2	34	34.3	-2.08285
138	846	C	14	1	132	134	127.33	145.73	125.955	28.1	30.5	30.6	29.8	29.1	31.4	34	34.1	33.8	34	-1.89932
138	846	C	14	1	136	138	127.37	145.77	125.987	28	30.5	31.2	30.8	30.3	32.8	35.6	36.1	36	35.9	-1.91343
138	846	C	14	1	140	142	127.41	145.81	126.018	29.6	31.9	32.3	31.5	30.6	32.7	35.2	35.7	35.6	35.3	-1.70355
138	846	C	14	1	144	146	127.45	145.85	126.049	28.8	31.3	31.7	31	30.5	33.1	35.8	36.1	36	36.5	-1.80989
138	846	C	14	2	1	3	127.52	145.92	126.11	37.6	40.1	40.2	38.9	37.5	39	41.1	41.2	40.9	40.9	-0.65209
138	846	C	14	2	5	7	127.56	145.96	126.148	38.2	39.9	40	39.1	38.1	39.7	41.9	42.2	42	41.8	-0.573969
138	846	C	14	2	9	11	127.6	146	126.186	39	41.3	41.5	40.6	39.8	41.7	43.9	44.3	44.3	44.1	-0.469497
138	846	C	14	2	13	15	127.64	146.04	126.223	45.6	47.6	47.5	46.4	45.1	45.9	47.8	48.2	47.6	47.4	0.399141
138	846	C	14	2	17	19	127.68	146.08	126.261	39	41.7	42.6	42.3	42	45	47.8	48.3	48.2	48.9	-0.471358
138	846	C	14	2	21	23	127.72	146.12	126.299	46.3	48.2	48.2	47.2	45.8	46.6	48.6	48.9	48.1	47.8	0.489507
138	846	C	14	2	25	27	127.76	146.16	126.338	47.7	49.2	48.8	47.2	45.3	45.9	47.6	47.6	47.4	47.2	0.673031
138	846	C	14	2	29	31	127.8	146.2	126.376	47.2	49.2	48.9	47.3	45.4	45.9	47.6	47.5	47.1	47.4	0.606224
138	846	C	14	2	33	35	127.84	146.24	126.415	42.7	43.8	43.2	41.7	40.2	41	43	43.2	42.7	42.8	0.012405
138	846	C	14	2	37	39	127.88	146.28	126.453	41.3	42.2	41.6	40.4	39.1	40.1	42.3	42.7	42.4	42.3	-0.17298
138	846	C	14	2	41	43	127.92	146.32	126.493	42.3	43.8	43.5	42.3	40.9	41.9	44	44.4	44.2	44	-0.0421574
138	846	C	14	2	45	47	127.96	146.36	126.532	45.6	47.6	47.2	45.6	43.7	44.3	46.1	46.3	45.8	45.6	0.391697
138	846	C	14	2	49	51	128	146.4	126.571	47	49.2	48.7	46.5	44	44.1	45.8	46.1	45.3	44.6	0.57522
138	846	C	14	2	57	59	128.08	146.48	126.649	47.2	48.6	47.8	45.7	43.2	43.3	44.9	45	44.5	44.2	0.599709
138	846	C	14	2	61	63	128.12	146.52	126.689	46.2	47.8	47.3	45.4	43.4	43.8	45.7	45.7	45.1	45.1	0.467026
138	846	C	14	2	65	67	128.16	146.56	126.729	44.5	45.6	45.2	44.1	42.9	44	46.1	46.4	46.2	46.4	0.242115
138	846	C	14	2	69	71	128.2	146.6	126.769	47.1	48.3	48	46.8	45.5	46.5	48.3	48.6	48.3	48.1	0.583742
138	846	C	14	2	73	75	128.24	146.64	126.809	50.3	52.3	52.2	51	49.5	50.1	51.8	52.1	51.6	51.4	1.00442
138	846	C	14	2	77	79	128.28	146.68	126.849	50.7	52.4	52.1	50.8	49.2	49.7	51.3	51.6	51.1	51	1.05619
138	846	C	14	2	81	83	128.32	146.72	126.889	51	52.8	52.5	51.1	49.4	49.8	51.4	51.7	51.3	50.6	1.09479
138	846	C	14	2	85	87	128.36	146.76	126.927	45.6	46.5	46.2	45.3	44.4	45.7	47.5	48.1	48.4	48.4	0.38239
138	846	C	14	2	89	91	128.4	146.8	126.966	49.2	50.8	50.4	48.8	47.1	47.7	49.4	49.5	49.2	49.1	0.85577
138	846	C	14	2	93	95	128.44	146.84	127.004	57.7	58.5	58.3	58.4	58	59.2	61.4	61.8	61.6	61.6	1.97474
138	846	C	14	2	97	99	128.48	146.88	127.042	49	50.5	50.5	49.8	49	50.2	52.1	52.4	52.2	52.8	0.827558
138	846	C	14	2	101	103	128.52	146.92	127.08	44.8	46.3	46.1	44.9	43.6	44.8	46.8	47.2	47.2	47	0.273266
138	846	C	14	2	105	107	128.56	146.96	127.117	44.1	46.3	46.4	45.1	43.8	45.2	47.4	47.7	47.4	47.6	0.180108
138	846	C	14	2	109	111	128.6	147	127.154	40.7	42.8	42.7	41.4	40	41.3	43.5	43.7	43.3	43.4	-0.268782
138	846	C	14	2	113	115	128.64	147.04	127.192	39	40.5	40.2	38.9	37.6	39	41.1	41.3	40.9	40.9	-0.493693
138	846	C	14	2	117	119	128.68	147.08	127.228	36.4	38.3	38.2	37.1	35.9	37.5	39.9	40.1	39.8	40	-0.837181
138	846	C	14	2	121	123	128.72	147.12	127.264	36.3	38	37.8	36.5	35.2	36.7	39	39.3	38.8	38.7	-0.851287
138	846	C	14	2	125	127	128.76	147.16	127.299	40.5	42.4	42.2	40.8	39.1	40.2	42.3	42.7	41.9	41.7	-0.298855
138	846	C	14	2	129	131	128.8	147.2	127.333	48.7	50.8	50.6	49.3	47.9	48.6	50.4	50.6	50.1	49.9	0.780588
138	846	C	14	2	133	135	128.84	147.24	127.367	48.5	50	50.1	49.3	48.3	49.5	51.5	51.9	51.5	51.4	0.753307
138	846	C	14	2	137	139	128.88	147.28	127.4	44.4	45.7	45.5	44.7	44	45.6	47.9	48.5	48.2	48.3	0.212189
138	846	C	14	2	141	143	128.92	147.32	127.434	51.2	52.4	52.2	51.4	50.5	51.6	53.4	53.6	53.4	53.5	1.10718
138	846	C	14	2	145	147	128.96	147.36	127.468	59.4	61	60.5	59.1	57.2	57.2	58.5	58.7	58	57.2	2.18662
138	846	C	14	3	1	3	129.02	147.42	127.518	51.8	52.8	52.6	51.5	50.1	50.6	52.3	52.8	52.5	52.5	1.1839
138	846	C	14	3	5	7	129.06	147.46	127.552	49.8	51.1	50.9	49.8	48.4	49.2	51	51.4	50.8	50.9	0.919467
138	846	C	14	3	9	11	129.1	147.5	127.586	43.7	45	44.9	44.1	43.3	44.7	46.9	47.4	47.4	47.8	0.114844
138	846	C	14	3	13	15	129.14	147.54	127.62	49.2	50.5	50.4	49.3	47.9	48.7	50.6	51.2	50.9	50.5	0.838554
138	846	C	14	3	17	19	129.18	147.58	127.654	48.2	49.7	49.2	47.5	45.5	45.8	47.6	47.6	47	46.5	0.705871
138	846	C	14	3	21	23	129.22	147.62	127.688	43.4	44.5	44	42.7	41.4	42.4	44.6	44.8	44.3	44.3	0.0725261
138	846	C	14	3	25	27	129.26	147.66	127.721	45.1	46.8	46.6	45.4	44.2	45.3	47.3	47.7	47.7	47.5	0.295575
138	846	C	14	3	29	31	129.3	147.7	127.755	45.5	46.5	45.8	44.4	42.8	43.5	45.3	45.6	45.6	45.2	0.347346
138	846	C	14	3	33	35	129.34	147.74	127.789	48.7	50.6	50.1	48.5	46.8	47.5	49.2	49.3	49.1	49.1	0.768025
138	846	C	14	3	37	39	129.38	147.78	127.822	49.5	50.8	50	48.3	46.4	46.8	48.4	48.6	48.5	48.1	0.872496
138	846	C	14	3	41	43	129.42	147.82	127.856	51	52.8	52.5	51.2	49.7	50.1	51.7	52.1	52.1	51.3	1.0692
138	846	C	14	3	45	47	129.46	147.86	127.89	46.3	48.2	48.2	47.3	46.4	47.6	49.6	50	49.8	49.7	0.449026
138	846	C	14	3	49	51	129.5	147.9	127.925	51.6	53.3	53.1	52.1	50.7	51.3	52.9	53.4	52.9	52.5	1.14639
138	846	C	14	3	53	55	129.54	147.94	127.961	51.1	53	52.9	51.7	50.5	51.2	52.9	53	52.6	52.3	1.07958
138	846	C	14	3	57	59	129.58	147.98	127.997	51.6	52.9	52.5	51.3	49.8	50.4	51.9	52.1	52.1	52.1	1.14452
138	846	C	14	3	61	63	129.62	148.02	128.033	45.7	46.9	46.7	45.8	44.9	46.3	48.2	48.8	48.9	49	0.366252
138	846	C	14	3	65	67	129.66	148.06	128.07	45.3	46.5	46.3	45.4	44.6	45.9	47.9	48.4	48.7	48.8	0.31262
138	846	C	14	3	69	71	129.7	148.1	128.108	52.5	54.8	54.6	53.5	52.3	52.9	54.4	54.8	54.4	53.6	1.26031
138	846	C	14	3	73	75	129.74	148.14	128.145	50.4	52.1	52	51	49.8	50.5	52.2	52.8	52.5	51.5	0.982698
138	846	C	14	3	77	79	129.78	148.18	128.183	48.1	50.4	50.3	49.1	48	49.1	50.9	51.2	51	50.6	0.678736
138	846	C	14	3	81	83	129.82	148.22	128.221	50.4	52.2	52.5	51.5	50.5	51.4	53.3	53.4	53	53.1	0.980837
138	846	C	14	3	85	87	129.86	148.26	128.258	46.7	48	47.9	47.1	46.6	48.3	50.4	50.8	50.8	51	0.492421
138	846	C	14	3	89	91	129.9	148.3	128.297	49.7	51.6	51.7	51	50.2	51.7	53.6	54	53.8	53.5	0.886749
138	846	C	14	3	93	95	129.94	148.34	128.332	45.6	47.8	47.8	47	46.3	47.9	50	50.3	50.3	50.3	0.345632
138	846	C	14	3	97	99	129.98	148.38	128.369	45	46.8	46.8	45.9	45.1	46.6	48.7	49.1	48.9	48.7	0.265649
138	846	C	14	3	101	103	130.02	148.42	128.406	41.4	43.1	42.7	41.4	40.1	41.3	43.3	43.7	43.3	43.3	-0.209592
138	846	C	14	3	105	107	130.06	148.46	128.442	41.5	43.3	42.9	41.2	39.5	40.7	42.9	42.9	42.3	42.3	-0.197347
138	846	C	14	3	109	111	130.1	148.5	128.479	42.4	43.3	42.8	41.2	39.4	40.4	42.6	42.7	41.8	42.3	-0.0797002
138	846	C	14	3	113	115	130.14	148.54	128.516	43.6	45.1	44.6	43	41.3	42.2	44.2	44.4	43.9	43.8	0.0774727
138	846	C	14	3	117	119	130.18	148.58	128.553	43.3	44.9	44.5	42.8	41.2	42.2	44.2	44.3	43.9	43.8	0.0370162
138	846	C	14	3	121	123	130.22	148.62	128.591	46.6	47.9	47.1	45	43	43.6	45.4	45.5	44.8	44.6	0.47087
138	846	C	14	3	125	127	130.26	148.66	128.629	44.7	45.7	45.1	43.7	42.2	43.2	45.2	45.5	45.3	45.1	0.219609
138	846	C	14	3	129	131	130.3	148.7	128.666	41.1	42	41.6	40.5	39.5	41.1	43.3	43.6	43.6	43.6	-0.255632
138	846	C	14	3	133	135	130.34	148.74	128.704	43.7	45.3	45	43.6	42.3	43.6	45.7	46	45.9	45.9	0.0859949
138	846	C	14	3	137	139	130.38	148.78	128.742	42	43	42.7	41.8	40.7	42.2	44.5	45	44.9	44.9	-0.138916
138	846	C	14	3	141	143	130.42	148.82	128.779	44	46.2	46.3	45.3	44.3	45.7	47.8	48.3	47.9	47.4	0.12366
138	846	C	14	3	145	147	130.46	148.86	128.816	46.2	47.2	46.9	45.9	44.8	46	48.1	48.4	48	47.7	0.412585
138	846	C	14	4	1	3	130.52	148.92	128.872	41.5	42.8	42.8	41.8	40.9	42.6	44.9	45.4	45.3	45.6	-0.208049
138	846	C	14	4	5	7	130.56	148.96	128.91	47.5	48	47.8	47.1	46.3	47.5	49.5	50.2	50.1	49.9	0.581538
138	846	C	14	4	9	11	130.6	149	128.948	51	52.2	51.7	50.2	48.6	49.2	51	51.3	50.9	50.5	1.04174
138	846	C	14	4	13	15	130.64	149.04	128.987	46.4	46.9	46.1	44.8	43.6	44.6	46.4	47	47.2	47.1	0.434748
138	846	C	14	4	17	19	130.68	149.08	129.026	45.7	46.8	46.3	45.1	44	45.1	47	47.4	47.4	47.6	0.341591
138	846	C	14	4	21	23	130.72	149.12	129.065	47.9	49.9	49.8	48.7	47.7	48.8	50.8	50.9	50.8	51	0.630516
138	846	C	14	4	25	27	130.76	149.16	129.105	38.3	40	40.2	39.3	38.5	40.4	42.9	43.2	42.9	43.6	-0.635242
138	846	C	14	4	29	31	130.8	149.2	129.144	37.7	39.1	39.2	38.5	37.9	39.9	42.5	42.9	42.8	43.3	-0.715224
138	846	C	14	4	33	35	130.84	149.24	129.183	43.9	46.4	46.2	44.9	43.7	44.8	46.8	46.9	46.2	46.3	0.100713
138	846	C	14	4	37	39	130.88	149.28	129.222	42.1	44.1	43.9	42.6	41.6	43.1	45.3	45.4	45.2	45.6	-0.137373
138	846	C	14	4	41	43	130.92	149.32	129.26	44.4	45.8	45.6	44.5	43.4	44.9	47	47.3	47.1	47.4	0.164728
138	846	C	14	4	45	47	130.96	149.36	129.299	48.4	50.6	50.6	49.6	48.5	49.5	51.5	51.8	51.2	50.8	0.690809
138	846	C	14	4	49	51	131	149.4	129.337	45.5	47.1	47	46.2	45.4	46.8	48.8	49	49.2	49.5	0.307795
138	846	C	14	4	53	55	131.04	149.44	129.375	43.1	44.3	44.3	43.7	42.9	44.5	46.7	47.2	47.2	46.9	-0.0093424
138	846	C	14	4	57	59	131.08	149.48	129.413	45.9	47.9	47.9	47.2	46.5	48.2	50.3	50.6	50.5	50.6	0.358635
138	846	C	14	4	61	63	131.12	149.52	129.452	51.2	53.6	53.9	52.7	51.4	52.2	54	54.2	53.6	53.1	1.05599
138	846	C	14	4	65	67	131.16	149.56	129.49	49.6	51.2	51.1	50.2	49.2	50.4	52.2	52.4	52	52.1	0.84426
138	846	C	14	4	69	71	131.2	149.6	129.529	47.4	48.7	48.6	47.7	46.6	47.6	49.5	49.9	49.8	49.7	0.553473
138	846	C	14	4	73	75	131.24	149.64	129.567	49.7	51.6	51.5	50.1	48.5	49.1	50.9	51.2	50.7	50.5	0.855574
138	846	C	14	4	77	79	131.28	149.68	129.606	49	50.4	49.9	48.3	46.5	47	48.8	49	48.5	48.4	0.762416
138	846	C	14	4	81	83	131.32	149.72	129.645	44.5	45	44.4	43.2	41.8	42.8	44.9	45.3	45.1	45.2	0.168597
138	846	C	14	4	85	87	131.36	149.76	129.683	47.1	48.9	48.4	46.4	44.3	44.8	46.6	47	46.4	46.2	0.510224
138	846	C	14	4	89	91	131.4	149.8	129.722	47.4	49.3	48.4	45.9	43.3	43.5	45.1	45.2	44.7	44.5	0.54882
138	846	C	14	4	93	95	131.44	149.84	129.76	42.3	43.7	43.1	41.5	39.9	40.8	42.7	43.1	43	42.5	-0.124051
138	846	C	14	4	97	99	131.48	149.88	129.799	38.4	39.2	39	38	36.9	38.4	40.8	41.2	40.9	41.3	-0.638818
138	846	C	14	4	101	103	131.52	149.92	129.836	35	36.3	35.9	35	34.4	36.3	38.5	39.1	39.6	39.7	-1.08771
138	846	C	14	4	105	107	131.56	149.96	129.875	38.2	39.6	39.4	38.4	37.4	38.9	41.1	41.6	41.5	41.5	-0.667029
138	846	C	14	4	109	111	131.6	150	129.914	41.9	43.5	43.2	42.3	41.3	42.5	44.7	45.3	45.1	44.8	-0.180474
138	846	C	14	4	113	115	131.64	150.04	129.952	52.9	55.1	54.7	52.7	50.4	50.3	51.7	51.9	50.9	50.5	1.26788
138	846	C	14	4	117	119	131.68	150.08	129.991	44.5	45.5	45.1	44.4	43.5	44.6	46.4	46.9	47.1	46.8	0.160222
138	846	C	14	4	121	123	131.72	150.12	130.03	54	56.1	55.9	54.3	52.4	52.4	53.8	54.1	53.5	52.6	1.41094
138	846	C	14	4	125	127	131.76	150.16	130.069	51	52.8	52.8	51.8	50.5	51.3	53	53.2	52.7	52.9	1.01475
138	846	C	14	4	129	131	131.8	150.2	130.108	45.3	46.5	46	44.9	43.8	45	47	47.3	46.8	46.9	0.262832
138	846	C	14	4	133	135	131.84	150.24	130.147	48.7	49.9	49.7	48.5	47.2	48.1	50	50.1	49.8	49.9	0.709862
138	846	C	14	4	137	139	131.88	150.28	130.186	48.5	49.9	49.4	47.9	46.2	46.9	48.6	48.8	48.2	47.9	0.68258
138	846	C	14	4	141	143	131.92	150.32	130.224	42.8	44.1	43.8	42.9	41.9	43.1	45.1	45.3	45	45.2	-0.0693416
138	846	C	14	4	145	147	131.96	150.36	130.263	39.5	40.5	40.5	39.8	39.1	40.6	42.8	43.4	43.6	44.1	-0.505057
138	846	C	14	5	1	3	132.02	150.42	130.321	41.6	43.2	43.4	42.5	41.5	42.9	45.2	45.6	45.2	45.1	-0.229772
138	846	C	14	5	5	7	132.06	150.46	130.359	37.7	38.9	38.6	37.5	36.6	38.2	40.5	41	40.9	41.1	-0.744538
138	846	C	14	5	9	11	132.1	150.5	130.398	32.9	34.2	33.8	32.8	31.8	33.5	35.9	36.3	36.4	36.8	-1.37788
138	846	C	14	5	13	15	132.14	150.54	130.437	30.1	31.3	31.2	30.3	29.6	31.5	34	34.5	34.6	34.9	-1.74772
138	846	C	14	5	17	19	132.18	150.58	130.475	27	28	27.9	27	26.3	28.4	31.1	31.6	31.7	32.3	-2.15709
138	846	C	14	5	21	23	132.22	150.62	130.514	34.7	36.9	37.1	36.2	35.4	37.2	39.5	39.7	39.5	40	-1.14352
138	846	C	14	5	25	27	132.26	150.66	130.553	27.3	28.9	28.7	27.7	26.8	28.7	31.4	31.7	31.7	32.3	-2.11942
138	846	C	14	5	29	31	132.3	150.7	130.592	25.1	26.7	26.5	25.4	24.4	26.5	29.2	29.7	29.4	30.2	-2.41021
138	846	C	14	5	33	35	132.34	150.74	130.631	26	27.2	27	25.9	24.8	26.6	29.3	29.7	29.7	30.4	-2.29256
138	846	C	14	5	37	39	132.38	150.78	130.672	34.2	35	34.5	33.5	32.4	34	36.2	36.7	37	37.1	-1.21312
138	846	C	14	5	41	43	132.42	150.82	130.714	42.9	44.6	44.2	42.8	41.5	42.4	44.2	44.5	44.6	44.4	-0.0677989
138	846	C	14	5	45	47	132.46	150.86	130.756	44.3	46	46	45	43.7	44.7	46.9	47.3	46.5	46.4	0.115725
138	846	C	14	5	49	51	132.5	150.9	130.8	42.6	43.7	43.6	42.6	41.4	42.5	44.6	44.9	44.5	44.6	-0.109186
138	846	C	14	5	53	55	132.54	150.94	130.844	41.9	43.3	42.9	41.6	40.2	41.2	43.1	43.4	43.2	43.8	-0.202344
138	846	C	14	5	57	59	132.58	150.98	130.893	43.2	44.8	44.2	42.3	40	40.4	42.1	42.4	42	41.8	-0.0319955
138	846	C	14	5	61	63	132.62	151.02	130.943	40.4	42.2	42.1	40.8	39.2	40.1	42.2	42.7	42.3	42	-0.401834
138	846	C	14	5	65	67	132.66	151.06	130.987	42.1	43.5	43.2	41.6	39.6	40.1	42	42.7	42.2	41.7	-0.178785
138	846	C	14	5	69	71	132.7	151.1	131.025	39.9	41.5	41	39.3	37.5	38.1	40.2	40.6	40.6	40.8	-0.469572
138	846	C	14	5	73	75	132.74	151.14	131.064	43.5	45.3	44.7	42.7	40.5	40.8	42.6	42.9	42.5	42.4	0.00380797
138	846	C	14	5	77	79	132.78	151.18	131.103	40.2	41.3	40.6	38.7	36.5	37.1	39.1	39.5	39.1	39.1	-0.431907
138	846	C	14	5	81	83	132.82	151.22	131.141	37.2	38	37.5	36.4	35.3	36.6	38.8	39.3	39.2	39.5	-0.828096
138	846	C	14	5	85	87	132.86	151.26	131.179	43.7	45.3	44.5	42.5	40.1	40.2	42	42.4	41.9	41.1	0.0273667
138	846	C	14	5	89	91	132.9	151.3	131.218	47.4	49.3	48.8	46.8	44.5	44.6	46.2	46.4	45.9	45.6	0.513922
138	846	C	14	5	93	95	132.94	151.34	131.256	46.7	48.7	48.2	46.4	44.2	44.5	46.3	46.4	45.8	45.2	0.420764
138	846	C	14	5	97	99	132.98	151.38	131.295	44.8	46.8	47	46	44.8	45.9	47.9	48.4	48.1	47.6	0.169503
138	846	C	14	5	101	103	133.02	151.42	131.332	43.6	44.9	44.9	44	43	44.5	46.6	47.2	46.9	47.3	0.010469
138	846	C	14	5	105	107	133.06	151.46	131.371	43.2	45	45	44.1	42.9	44.2	46.3	46.7	46.4	46.1	-0.0431627
138	846	C	14	5	109	111	133.1	151.5	131.41	41.9	43.3	43.2	42.3	41.3	42.7	44.9	45.3	45	45.5	-0.215372
138	846	C	14	5	113	115	133.14	151.54	131.446	39.5	40.2	39.9	38.9	37.8	39.3	41.6	41.9	41.8	41.8	-0.53251
138	846	C	14	5	117	119	133.18	151.58	131.479	41	42.8	42.7	41.6	40.5	41.7	44	44.3	43.8	43.9	-0.335811
138	846	C	14	5	121	123	133.22	151.62	131.512	37.2	38.4	38.4	37.6	36.7	38.4	40.8	41.3	41	41.6	-0.837403
138	846	C	14	5	125	127	133.26	151.66	131.545	36.3	37.9	37.8	36.8	35.7	37.5	39.8	40.2	40.2	40.1	-0.956911
138	846	C	14	5	129	131	133.3	151.7	131.577	35.2	36.4	36.3	35.1	33.9	35.3	37.7	38.1	37.9	38.1	-1.10277
138	846	C	14	5	133	135	133.34	151.74	131.61	34.4	36	35.9	34.6	33.3	34.8	37.2	37.4	37.3	37.2	-1.2091
138	846	C	14	5	137	139	133.38	151.78	131.642	34.1	35.8	35.8	34.8	33.7	35.5	37.9	38.5	38.5	38.6	-1.24956
138	846	C	14	5	141	143	133.42	151.82	131.675	37.4	39.3	39.1	37.7	36.4	37.9	40.1	40.5	39.8	40.2	-0.815705
138	846	C	14	5	145	147	133.46	151.86	131.709	37	39.1	39.3	38.3	37.2	38.7	41.1	41.5	41	41.6	-0.869337
138	846	C	14	6	1	3	133.52	151.92	131.764	40	42.3	42.5	41.6	40.6	42.2	44.5	44.7	44.3	44.1	-0.475474
138	846	C	14	6	5	7	133.56	151.96	131.802	39.2	41.8	42.2	41.4	40.6	42.3	44.7	45	44.9	44.9	-0.581807
138	846	C	14	6	9	11	133.6	152	131.84	35.9	37.6	37.9	37.4	37.1	39.4	42	42.7	42.7	43.2	-1.01752
138	846	C	14	6	13	15	133.64	152.04	131.879	40.9	43.1	43.4	42.6	41.8	43.5	45.8	46.2	46.1	46.2	-0.359688
138	846	C	14	6	17	19	133.68	152.08	131.918	46.5	49.2	49.4	48.3	46.9	48	49.9	50.2	49.9	50	0.377197
138	846	C	14	6	21	23	133.72	152.12	131.955	45.6	47.7	47.7	46.9	46	47.4	49.5	49.9	49.9	49.4	0.257689
138	846	C	14	6	25	27	133.76	152.16	131.994	42.1	44.1	44.5	44	43.4	45.6	47.8	48.5	48.3	48.8	-0.204377
138	846	C	14	6	29	31	133.8	152.2	132.032	44.8	46.9	47	46.1	45	46.4	48.5	48.9	48.6	48.9	0.150426
138	846	C	14	6	33	35	133.84	152.24	132.071	45	46.3	46.2	45.4	44.6	46	48.2	48.6	48.5	49	0.175846
138	846	C	14	6	37	39	133.88	152.28	132.11	45.9	47.6	47.7	46.9	45.8	47	49	49.2	48.9	48.9	0.293493
138	846	C	14	6	41	43	133.92	152.32	132.147	45.5	47.6	47.7	46.8	45.6	46.9	49	49.4	49.1	49.1	0.239861
138	846	C	14	6	45	47	133.96	152.36	132.186	48.1	49.2	49.1	48.2	47.2	48.3	50.3	50.7	50.7	50.8	0.581488
138	846	C	14	6	49	51	134	152.4	132.224	52.3	53.7	53.2	51.7	49.9	50.3	51.9	52.1	51.4	51.3	1.13392
138	846	C	14	6	53	55	134.04	152.44	132.263	49.7	51.7	51.6	50.3	48.7	49.4	51	51.1	50.6	50.3	0.790431
138	846	C	14	6	57	59	134.08	152.48	132.3	48.9	50.7	50.4	49	47.3	47.9	49.8	50.1	49.8	49.9	0.684098
138	846	C	14	6	61	63	134.12	152.52	132.332	47.4	49.1	48.8	47.5	46	46.8	48.6	48.8	48.3	48.3	0.485538
138	846	C	14	6	65	67	134.16	152.56	132.365	42	43.1	42.7	41.7	40.7	42	44.1	44.8	44.9	45.1	-0.226858
138	846	C	14	6	69	71	134.2	152.6	132.397	44.5	46.9	46.8	45.5	44	45.2	47.2	47.4	47	46.7	0.101594
138	846	C	14	6	73	75	134.24	152.64	132.428	45	46.6	46.5	45.5	44.4	45.8	48	48.4	48.2	48.5	0.16654
138	846	C	14	6	77	79	134.28	152.68	132.458	47.8	49.9	49.7	48.4	47	47.8	49.7	49.8	49.2	49	0.534517
138	846	C	14	6	81	83	134.32	152.72	132.488	50.5	51.4	50.9	49.6	48.1	48.7	50.4	50.6	50.3	50.3	0.889319
138	846	C	14	6	85	87	134.36	152.76	132.519	50.3	51.4	50.6	48.7	46.7	47.1	48.7	48.8	48.4	48.4	0.862038
138	846	C	14	6	89	91	134.4	152.8	132.549	50.6	51.8	51.5	50	48.2	48.7	50.4	50.6	50.1	50.2	0.900633
138	846	C	14	6	93	95	134.44	152.84	132.579	48.9	50.5	50	48.4	46.7	47.4	49.1	49.2	48.8	48.8	0.675723
138	846	C	14	6	97	99	134.48	152.88	132.605	42.4	43.8	43.4	42	40.6	41.8	44	44.3	44	44.1	-0.181602
138	846	C	14	6	101	103	134.52	152.92	132.628	37.5	39.2	39.2	38	37	38.7	41.1	41.4	41.4	41.9	-0.828121
138	846	C	14	6	105	107	134.56	152.96	132.651	34.5	35.9	35.6	34.2	32.9	34.3	36.7	37.2	37.2	37.5	-1.22431
138	846	C	14	6	109	111	134.6	153	132.674	37	38.5	38.1	36.7	35.3	36.5	38.8	39.3	39.2	38.7	-0.895859
138	846	C	14	6	113	115	134.64	153.04	132.697	28.8	29.3	28.8	27.6	26.5	28.3	30.9	31.5	31.6	31.8	-1.97716
138	846	C	14	6	117	119	134.68	153.08	132.719	27.4	28.6	27.9	26.7	25.5	27.1	29.9	30.2	30.2	30.8	-2.16255
138	846	C	14	6	121	123	134.72	153.12	132.739	27.8	29.2	28.7	27.1	25.6	27.2	29.7	30.3	30	30.4	-2.11078
138	846	C	14	6	125	127	134.76	153.16	132.76	30.6	31.7	31.3	29.6	28.2	29.6	32.1	32.6	32.6	32.7	-1.7428
138	846	C	14	6	129	131	134.8	153.2	132.779	31.2	32.4	31.9	30.7	29.6	31.3	33.8	34	34.1	34.7	-1.66468
138	846	C	14	6	133	135	134.84	153.24	132.801	39.5	41.4	41.3	40.1	38.8	40	42.2	42.5	42.2	42.3	-0.57206
138	846	C	14	6	137	139	134.88	153.28	132.825	39.1	41.3	41.4	40.1	38.6	39.7	42	42.4	42.1	42.2	-0.625692
138	846	C	15	1	3	5	135.54	154.04		48.7	50	49.9	48.8	47.6	48.6	50.5	50.8	50.6	51	0.621454
138	846	C	15	1	7	9	135.58	154.08		55.7	56.6	56	54.6	53	53.6	55.2	55.6	55.3	55.4	1.54279
138	846	C	15	1	11	13	135.62	154.12		44.6	45.9	45.6	44.4	43	43.9	46	46.6	46.6	47	0.079406
138	846	C	15	1	23	25	135.74	154.24	133.717	43.7	44.7	44.3	43.1	41.9	43.2	45.3	45.8	45.7	45.6	-0.0419635
138	846	C	15	1	27	29	135.78	154.28	133.74	45.9	46.6	46.3	45.4	44.4	45.6	47.7	48.1	48.3	48.8	0.246962
138	846	C	15	1	31	33	135.82	154.32	133.766	45.8	46.3	45.8	44.5	43.2	44.1	46.2	46.6	46.4	46.2	0.232856
138	846	C	15	1	35	37	135.86	154.36	133.791	41.8	43.2	42.8	41.4	40	41.3	43.4	43.6	43.1	43.4	-0.295086
138	846	C	15	1	39	41	135.9	154.4	133.817	43.3	43.5	42.9	41.8	40.6	41.7	43.7	44.2	44	44.5	-0.098387
138	846	C	15	1	43	45	135.94	154.44	133.845	47.7	48	47.3	46	44.6	45.5	47.3	47.5	47.5	47.7	0.480395
138	846	C	15	1	47	49	135.98	154.48	133.874	47.4	48	47.3	46	44.8	45.9	47.7	48	47.6	47.6	0.439939
138	846	C	15	1	51	53	136.02	154.52	133.903	48.4	49.8	49.2	47.5	45.8	46.5	48.4	48.5	47.8	47.6	0.570761
138	846	C	15	1	55	57	136.06	154.56	133.932	44.8	46.5	46	44.6	43.1	44	45.9	46.1	45.7	45.7	0.0955199
138	846	C	15	1	59	61	136.1	154.6	133.961	39.5	41.5	41.7	41	40.4	42.5	44.9	45.3	45.4	45.6	-0.603701
138	846	C	15	1	63	65	136.14	154.64	133.989	40.1	41.4	41.5	40.8	40.2	41.9	44.2	44.9	45.3	45.7	-0.52558
138	846	C	15	1	67	69	136.18	154.68	134.018	40.9	41.9	41.8	41.1	40.6	42.3	44.6	45.1	45.3	45.8	-0.421108
138	846	C	15	1	71	73	136.22	154.72	134.048	44.2	45.9	46.2	45.5	44.8	46.3	48.4	48.8	48.6	48.8	0.0127457
138	846	C	15	1	75	77	136.26	154.76	134.076	37.2	39.5	40.3	40.1	40	42.3	45.1	45.6	45.6	46.1	-0.910455
138	846	C	15	1	79	81	136.3	154.8	134.106	36.1	38.8	39.8	39.7	39.7	42	44.7	45.3	45.2	45.5	-1.05631
138	846	C	15	1	83	85	136.34	154.84	134.135	32	34.3	35.4	35.7	36	39	42	42.6	43.2	43.9	-1.59743
138	846	C	15	1	87	89	136.38	154.88	134.165	34.2	37.3	38.4	38.7	39.2	42.1	44.8	45.4	45.5	46.2	-1.30851
138	846	C	15	1	91	93	136.42	154.92	134.196	38.1	41.3	42.4	42.2	42	44	46.4	47	46.8	46.9	-0.7956
138	846	C	15	1	95	97	136.46	154.96	134.227	38.1	41.4	42.4	42.1	41.9	44	46.7	47.2	46.8	46.8	-0.796531
138	846	C	15	1	99	101	136.5	155	134.258	35.6	37.8	38.5	38.2	37.9	40.2	42.8	43.3	43.2	43.5	-1.12684
138	846	C	15	1	103	105	136.54	155.04	134.29	36.4	38.4	38.9	38.5	38.2	40.3	42.8	43.3	43.3	43.8	-1.02237
138	846	C	15	1	107	109	136.58	155.08	134.321	37.1	40.1	41	40.8	40.4	42.6	45.1	45.3	45	45.2	-0.931075
138	846	C	15	1	111	113	136.62	155.12	134.353	34.3	36.7	37.6	37.3	37.1	39.6	42.3	42.7	42.8	43.3	-1.30091
138	846	C	15	1	115	117	136.66	155.16	134.386	33.4	36	36.9	36.9	37.1	39.9	42.9	43.6	43.6	43.9	-1.42042
138	846	C	15	1	119	121	136.7	155.2	134.418	34.9	37.9	39	39.1	39.4	42.1	45	45.6	45.3	45.8	-1.22372
138	846	C	15	1	123	125	136.74	155.24	134.45	34	37.1	38.2	38.4	38.7	41.6	44.5	45.2	45.2	45.5	-1.34323
138	846	C	15	1	127	129	136.78	155.28	134.483	33.3	36.1	37	37.2	37.5	40.5	43.6	44.3	44.1	44.6	-1.43639
138	846	C	15	1	131	133	136.82	155.32	134.515	32.5	35.2	36.1	36.3	36.6	39.6	42.5	43.2	43.3	43.7	-1.54272
138	846	C	15	1	135	137	136.86	155.36	134.549	34.4	36.7	37.6	37.5	37.5	40.1	42.7	43.3	43.4	44.2	-1.29332
138	846	C	15	1	139	141	136.9	155.4	134.582	33.8	36.6	37.4	37.1	36.8	39.3	41.9	42.4	42.1	42.6	-1.3733
138	846	C	15	1	143	145	136.94	155.44	134.615	31.9	34.5	35.5	35.6	35.8	38.5	41.4	42.2	42.3	42.7	-1.62457
138	846	C	15	2	1	3	137.02	155.52	134.681	35.7	38.6	39.6	39.9	40.3	43.1	45.8	46.6	46.9	47.2	-1.12577
138	846	C	15	2	5	7	137.06	155.56	134.714	33.1	36.2	37.7	38.3	39.2	43	46.2	47.3	47.6	47.7	-1.46925
138	846	C	15	2	9	11	137.1	155.6	134.748	33.3	36.1	37.1	37.4	37.9	40.9	43.8	44.6	44.9	45.3	-1.44383
138	846	C	15	2	13	15	137.14	155.64	134.781	34	36.7	37.8	38	38.3	41.2	44.2	44.8	44.9	45.6	-1.35254
138	846	C	15	2	17	19	137.18	155.68	134.815	31.8	34.9	36.3	36.8	37.3	40.7	43.9	44.8	44.7	45.1	-1.64332
138	846	C	15	2	21	23	137.22	155.72	134.848	29.7	32.2	33.4	33.9	34.6	38.1	41.4	42.3	42.8	43.7	-1.92094
138	846	C	15	2	25	27	137.26	155.76	134.882	30.1	33.4	34.6	35.1	36.3	40.1	43.3	44.3	44.9	45.5	-1.86917
138	846	C	15	2	29	31	137.3	155.8	134.916	28.3	30.9	32	32.5	33.2	36.8	40.1	41.1	41.8	42.2	-2.10725
138	846	C	15	2	33	35	137.34	155.84	134.95	31.2	34.4	35.9	36.3	37	40.8	44.2	45	45	45.4	-1.7261
138	846	C	15	2	37	39	137.38	155.88	134.983	32.6	35.6	36.7	37	37.8	41.1	44.4	45	44.6	44.9	-1.54258
138	846	C	15	2	41	43	137.42	155.92	135.017	31.4	34.3	35.7	36.1	36.8	39.9	43.1	43.8	44	44.7	-1.70161
138	846	C	15	2	45	47	137.46	155.96	135.052	34	37.1	38.3	38.4	38.8	41.5	44.4	45.1	45	45	-1.35998
138	846	C	15	2	49	51	137.5	156	135.087	29.1	31.5	32.5	32.9	33.3	36.5	39.8	40.7	40.9	41.5	-2.0065
138	846	C	15	2	53	55	137.54	156.04	135.124	27.1	29.4	30.5	30.8	31.3	34.7	38	38.7	39.1	40.2	-2.27094
138	846	C	15	2	57	59	137.58	156.08	135.159	27.7	30.1	31.2	31.7	32.5	36.1	39.7	40.7	41	41.8	-2.19282
138	846	C	15	2	61	63	137.62	156.12	135.194	27.5	29.7	30.3	30.5	30.9	33.9	36.9	37.9	38.5	38.8	-2.2201
138	846	C	15	2	65	67	137.66	156.16	135.229	26.7	28.8	29.6	29.9	30.5	33.7	36.9	37.8	38.2	39	-2.32643
138	846	C	15	2	69	71	137.7	156.2	135.264	26.4	28.4	29.2	29.6	30.2	33.3	36.6	37.4	37.6	37.8	-2.36689
138	846	C	15	2	73	75	137.74	156.24	135.3	28.5	31.2	32.1	32.3	32.8	35.9	38.9	39.4	39.4	40	-2.09114
138	846	C	15	2	77	79	137.78	156.28	135.336	31.8	35.3	36.6	36.7	37	39.9	42.9	43.6	43.3	43.4	-1.65728
138	846	C	15	2	81	83	137.82	156.32	135.371	28.9	31.5	32.5	32.9	33.6	36.8	40	40.7	40.9	41	-2.0403
138	846	C	15	2	85	87	137.86	156.36	135.406	31.8	35.2	36.5	36.7	37.3	40.7	44	44.4	44.4	45	-1.65915
138	846	C	15	2	89	91	137.9	156.4	135.441	33.3	35.4	36.1	36.4	36.7	39.6	42.7	43.6	43.5	44.1	-1.46245
138	846	C	15	2	93	95	137.94	156.44	135.477	37.5	39.9	40.6	40.3	40.2	42.5	45	45.5	45.5	45.7	-0.910015
138	846	C	15	2	97	99	137.98	156.48	135.513	36.3	38.9	39.8	39.4	39.1	41.3	44	44.6	44.2	44.4	-1.06905
138	846	C	15	2	101	103	138.02	156.52	135.548	34.7	36.8	37.3	37	36.8	39	41.6	42.2	42	42.3	-1.28078
138	846	C	15	2	105	107	138.06	156.56	135.583	33.5	35.2	35.6	35.2	34.7	36.8	39.7	40.1	39.8	40.4	-1.43982
138	846	C	15	2	109	111	138.1	156.6	135.618	31.3	33.4	34.3	34.2	34.2	37	39.9	40.7	40.9	41.5	-1.73061
138	846	C	15	2	113	115	138.14	156.64	135.654	31.5	33.1	33.6	33.2	33	35.5	38.3	39.1	39.5	39.9	-1.70519
138	846	C	15	2	117	119	138.18	156.68	135.69	31.2	32.8	33.4	33.5	33.9	36.8	39.9	40.8	41.1	41.8	-1.74564
138	846	C	15	2	121	123	138.22	156.72	135.725	34.2	36.8	37.8	37.9	38.1	41.2	44.3	44.9	45.2	46.1	-1.35131
138	846	C	15	2	125	127	138.26	156.76	135.76	33.4	35	35.5	35.4	35.5	38.1	41	41.9	42.1	42.7	-1.45765
138	846	C	15	2	129	131	138.3	156.8	135.794	39.9	42.2	42.4	41.7	41	42.7	45.2	45.7	45.5	45.5	-0.602183
138	846	C	15	2	133	135	138.34	156.84	135.828	35.9	37.9	37.8	36.9	36.4	38.4	40.9	41.3	41.4	42	-1.13013
138	846	C	15	2	137	139	138.38	156.88	135.862	32.6	33.9	33.9	33.6	33.5	35.9	38.7	39.5	39.8	40	-1.56584
138	846	C	15	2	141	143	138.42	156.92	135.896	31.2	32.6	32.8	32.4	32.1	34.5	37.4	38.1	38.1	39.2	-1.75123
138	846	C	15	2	145	147	138.46	156.96	135.93	36.4	38.5	38.6	37.9	37.3	39.1	41.5	42.2	42.2	42.4	-1.06704
138	846	C	15	3	1	3	138.52	157.02	135.98	37.5	40.4	40.5	39.5	38.9	40.7	43.1	43.5	43.5	44	-0.923509
138	846	C	15	3	5	7	138.56	157.06	136.014	38.4	40.9	40.8	39.7	39	40.7	43.1	43.8	43.5	43.3	-0.805862
138	846	C	15	3	9	11	138.6	157.1	136.047	38.7	41	40.9	39.9	39	40.5	42.9	43.4	43.1	43.2	-0.767266
138	846	C	15	3	13	15	138.64	157.14	136.08	38.8	40.9	40.9	40.1	39.2	40.9	43.4	43.9	43.8	43.9	-0.755022
138	846	C	15	3	17	19	138.68	157.18	136.113	35.7	37.1	37.3	37	36.7	39	41.6	42.3	42.8	43.3	-1.16439
138	846	C	15	3	21	23	138.72	157.22	136.146	35.2	37.2	37.8	37.5	37.5	40.5	43.4	44.3	44.9	45.6	-1.23119
138	846	C	15	3	25	27	138.76	157.26	136.178	42.9	44.6	44.6	43.8	42.9	44.4	46.6	47	46.7	47.1	-0.217627
138	846	C	15	3	29	31	138.8	157.3	136.212	42.8	44.6	44.8	44.3	43.8	45.5	47.9	48.4	48.3	48.6	-0.231732
138	846	C	15	3	33	35	138.84	157.34	136.244	38.7	40	40.3	40.1	40	42.2	44.8	45.4	45.6	46.3	-0.77285
138	846	C	15	3	37	39	138.88	157.38	136.278	36.1	37.1	37.1	36.5	36.2	38.3	40.8	41.4	41.6	42	-1.11634
138	846	C	15	3	41	43	138.92	157.42	136.31	37	38.7	39.2	38.9	38.7	40.9	43.4	43.9	44.1	44.6	-0.998691
138	846	C	15	3	45	47	138.96	157.46	136.343	42.4	45.4	46.2	45.9	45.8	48	50.7	50.9	50.7	51.1	-0.288156
138	846	C	15	3	49	51	139	157.5	136.376	36.3	38.3	38.7	38.7	38.7	41.3	44	44.8	44.6	45.4	-1.09278
138	846	C	15	3	53	55	139.04	157.54	136.408	37.1	39.2	39.4	38.6	37.9	40	42.5	42.8	42.8	42.4	-0.988308
138	846	C	15	3	57	59	139.08	157.58	136.441	34.5	36	36.1	35.2	34.3	36.2	38.6	39.2	39	39.3	-1.3318
138	846	C	15	3	61	63	139.12	157.62	136.472	30.8	32.2	32.3	31.5	30.9	32.9	35.6	36.1	36.2	36.7	-1.82021
138	846	C	15	3	65	67	139.16	157.66	136.505	28.2	29.4	29.4	28.7	28	30	32.8	33.4	33.5	33.9	-2.1637
138	846	C	15	3	69	71	139.2	157.7	136.536	28.1	29.2	29.1	28.1	27.2	29	31.9	32.2	32.4	32.8	-2.17781
138	846	C	15	3	73	75	139.24	157.74	136.569	30.7	32.3	32.3	31.1	29.9	31.6	34.3	34.7	34.3	35.1	-1.83618
138	846	C	15	3	77	79	139.28	157.78	136.6	32.7	34.3	34.1	33.1	32.1	33.8	36.4	36.8	36.6	37.2	-1.5736
138	846	C	15	3	81	83	139.32	157.82	136.631	33.2	34.4	34.2	33.4	32.7	34.6	37.1	37.7	37.5	37.9	-1.50866
138	846	C	15	3	85	87	139.36	157.86	136.662	37.1	38.5	38.3	37.4	36.5	38.2	40.8	41.3	41.1	41.4	-0.995752
138	846	C	15	3	89	91	139.4	157.9	136.693	44.7	46.7	46.8	46.1	45.2	46.7	48.9	49.2	48.9	48.9	0.00463893
138	846	C	15	3	93	95	139.44	157.94	136.724	42.1	43.3	43.3	42.8	42.5	44.4	46.7	47.1	47.1	47.8	-0.338849
138	846	C	15	3	97	99	139.48	157.98	136.755	43.2	44.9	45.2	45	44.9	47.2	49.8	50.5	50.5	50.7	-0.194852
138	846	C	15	3	101	103	139.52	158.02	136.787	43.6	45.3	45.5	45.3	45.2	47.3	49.8	50.3	50.4	50.8	-0.143081
138	846	C	15	3	105	107	139.56	158.06	136.818	47.5	49.1	49.2	48.7	48.4	50.2	52.3	52.6	52.6	53.4	0.369825
138	846	C	15	3	109	111	139.6	158.1	136.849	51.1	52.8	52.9	52.1	51.4	52.6	54.4	54.5	54.4	54.8	0.843204
138	846	C	15	3	113	115	139.64	158.14	136.881	53.5	56.5	56.6	55.3	53.9	54.6	56.4	56.5	55.7	55.7	1.15848
138	846	C	15	3	117	119	139.68	158.18	136.913	49.4	50.3	50.2	49.5	48.6	49.8	51.7	52.2	51.9	51.8	0.617363
138	846	C	15	3	121	123	139.72	158.22	136.947	48	48.6	48.3	47.5	46.6	47.8	49.9	50.4	50.2	50	0.431979
138	846	C	15	3	125	127	139.76	158.26	136.979	52.5	54.7	54.5	53.2	51.8	52.4	54.1	54.2	53.8	53.7	1.02394
138	846	C	15	3	129	131	139.8	158.3	137.012	49.9	51.8	51.6	50.5	49.3	50.5	52.5	52.6	52.1	52.2	0.680448
138	846	C	15	3	133	135	139.84	158.34	137.045	43	44.5	44.6	44.1	43.9	46	48.5	49.1	49.1	49.5	-0.229578
138	846	C	15	3	137	139	139.88	158.38	137.078	43.9	44.9	44.7	44.1	43.7	45.5	47.8	48.4	48.4	48.8	-0.111931
138	846	C	15	3	141	143	139.92	158.42	137.111	43.6	45.4	45.3	44.2	43.2	44.6	46.8	47.2	46.8	47.1	-0.152387
138	846	C	15	3	145	147	139.96	158.46	137.144	47.3	48.6	48.1	46.5	44.6	45.3	47.2	47.5	46.9	46.9	0.334168
138	846	C	15	4	1	3	140.02	158.52	137.193	44.8	45.3	45.2	44.4	43.5	44.9	47	47.2	47.1	47.6	0.00338982
138	846	C	15	4	5	7	140.06	158.56	137.226	43	44.3	44	43	41.8	43.1	45.3	45.7	45.4	45.7	-0.234696
138	846	C	15	4	9	11	140.1	158.6	137.259	39.3	40.5	40.4	39.4	38.5	39.9	42.3	42.8	42.4	42.3	-0.723112
138	846	C	15	4	13	15	140.14	158.64	137.292	28.8	30.2	30.5	30.1	30.2	33.4	36.6	37.6	38.2	39.2	-2.10745
138	846	C	15	4	17	19	140.18	158.68	137.325	39.1	40.9	40.6	39	37.3	38.4	40.7	41.1	40.7	40.7	-0.751324
138	846	C	15	4	21	23	140.22	158.72	137.357	38.8	39.7	39.2	38	36.7	37.8	40.1	40.8	40.3	40.2	-0.791781
138	846	C	15	4	25	27	140.26	158.76	137.391	35.2	35.5	34.8	33.8	33.1	35	37.3	37.9	38.2	38.8	-1.26702
138	846	C	15	4	29	31	140.3	158.8	137.424	45.5	46.2	45.6	44.4	43	43.8	45.7	46.1	45.9	45.8	0.0891026
138	846	C	15	4	33	35	140.34	158.84	137.457	48.5	49.6	48.8	47.3	45.6	46	47.7	48	47.8	47.2	0.483431
138	846	C	15	4	37	39	140.38	158.88	137.491	47.4	47.7	47	45.8	44.4	45.2	47.1	47.6	47.5	47.2	0.337572
138	846	C	15	4	41	43	140.42	158.92	137.524	47.1	47.3	46.7	45.5	44.2	45.2	47.2	47.6	47.3	47.7	0.297115
138	846	C	15	4	45	47	140.46	158.96	137.558	44.7	45.2	44.9	43.8	42.8	44.2	46.3	46.9	46.8	47.1	-0.0200221
138	846	C	15	4	49	51	140.5	159	137.597	45.8	46.2	45.6	44.5	43.4	44.7	46.8	47.1	46.9	46.9	0.123975
138	846	C	15	4	53	55	140.54	159.04	137.637	46.6	47.3	46.8	45.5	44.1	45.1	47	47.4	47	47.2	0.228447
138	846	C	15	4	57	59	140.58	159.08	137.676	46.6	47.9	47.6	46.5	45.2	46.3	48.3	48.8	48.8	48.4	0.227517
138	846	C	15	4	61	63	140.62	159.12	137.716	47.1	48	47.7	46.7	45.6	46.6	48.6	48.9	48.6	48.9	0.292462
138	846	C	15	4	65	67	140.66	159.16	137.755	45.3	47.1	46.8	45.5	44.1	45.1	47.1	47.4	47	46.8	0.0543766
138	846	C	15	4	69	71	140.7	159.2	137.794	45.3	46.6	46.4	45.2	44	45.1	47.1	47.4	47.1	47.2	0.053446
138	846	C	15	4	73	75	140.74	159.24	137.834	47.6	48.5	48.2	47.4	46.4	47.5	49.6	50	49.6	49.9	0.355547
138	846	C	15	4	77	79	140.78	159.28	137.873	52.3	53.4	53	51.8	50.6	51.4	53.1	53.5	53.2	53.4	0.973855
138	846	C	15	4	81	83	140.82	159.32	137.912	53.7	54.5	54.1	53	51.7	52.4	54.2	54.5	54.1	54.1	1.15738
138	846	C	15	4	85	87	140.86	159.36	137.951	53.2	54	53.4	52.3	51.1	52	53.8	54.2	53.9	54	1.09057
138	846	C	15	4	89	91	140.9	159.4	137.99	50.9	52.3	52.1	51	49.9	50.9	52.7	53	52.8	52.9	0.786609
138	846	C	15	4	93	95	140.94	159.44	138.029	48.9	49.6	49.2	48.4	47.4	48.4	50.3	50.9	50.8	51.4	0.522173
138	846	C	15	4	97	99	140.98	159.48	138.069	49.4	50.8	50.4	48.9	47.1	47.6	49.4	49.8	49.2	49	0.587119
138	846	C	15	4	101	103	141.02	159.52	138.108	47.7	48.8	48.7	47.6	46.1	46.9	49	49.3	48.7	48.6	0.362208
138	846	C	15	4	105	107	141.06	159.56	138.147	45.4	46.7	46.2	44.5	42.9	43.7	45.7	45.8	45.6	46	0.0582458
138	846	C	15	4	109	111	141.1	159.6	138.186	42.6	42.9	42.2	41.1	40.1	41.4	43.5	43.9	44.2	44.6	-0.311593
138	846	C	15	4	113	115	141.14	159.64	138.225	45.9	46.9	46.4	45	43.6	44.7	46.8	47.1	46.5	46.3	0.122261
138	846	C	15	4	117	119	141.18	159.68	138.266	50.6	52.4	51.8	49.7	47.5	47.8	49.4	49.5	48.9	49	0.740569
138	846	C	15	4	121	123	141.22	159.72	138.307	46.2	46.7	46.6	45.8	44.9	46	48.1	48.6	48.3	48.7	0.159926
138	846	C	15	4	125	127	141.26	159.76	138.348	45.2	46.8	46.7	45.7	44.8	46.2	48.4	48.8	48.6	48.6	0.0272422
138	846	C	15	4	129	131	141.3	159.8	138.387	51.1	52.5	52.1	50.6	49	49.6	51.3	51.7	51.1	50.5	0.803654
138	846	C	15	4	133	135	141.34	159.84	138.424	55.5	56.7	55.7	53.4	50.8	50.7	52.1	52.2	51.7	51.4	1.38244
138	846	C	15	4	137	139	141.38	159.88	138.462	50.5	50.8	50.2	49.1	47.7	48.5	50.3	50.7	50.4	50.5	0.722741
138	846	C	15	4	141	143	141.42	159.92	138.499	48.6	49.8	49.4	48	46.5	47.2	49.1	49.4	49.2	48.8	0.47148
138	846	C	15	4	145	147	141.46	159.96	138.536	51.3	51.6	50.9	49.7	48.6	49.5	51.3	51.8	51.5	51.3	0.826282
138	846	C	15	5	1	3	141.52	160.02	138.592	54.9	56.4	55.7	54.1	52.4	52.7	54.2	54.3	54.1	53.7	1.2992
138	846	C	15	5	5	7	141.56	160.06	138.629	46.9	47.6	46.8	45.4	44.1	45	46.9	47.2	46.9	47.4	0.244243
138	846	C	15	5	9	11	141.6	160.1	138.666	45.1	46.1	45.7	44.3	42.7	43.4	45.3	45.9	45.8	45.2	0.00615673
138	846	C	15	5	13	15	141.64	160.14	138.703	41	41.4	40.7	39.5	38.3	39.5	41.7	42.1	42	42.5	-0.534961
138	846	C	15	5	17	19	141.68	160.18	138.739	47.6	48.7	48.2	46.5	44.6	45.3	47.2	47.3	47	47.2	0.333678
138	846	C	15	5	21	23	141.72	160.22	138.775	46.5	47.7	47.5	46.1	44.5	45.3	47.2	47.7	47.6	47.4	0.187819
138	846	C	15	5	25	27	141.76	160.26	138.81	44.6	45.1	44.5	43.2	41.8	42.9	44.9	45.4	45.1	45.4	-0.0634421
138	846	C	15	5	29	31	141.8	160.3	138.846	47.9	49.4	49	47.6	46.2	47	48.8	49.1	48.9	49.3	0.370412
138	846	C	15	5	33	35	141.84	160.34	138.882	49.9	51.5	51.2	50	48.8	49.6	51.4	51.7	51.3	51.2	0.632987
138	846	C	15	5	37	39	141.88	160.38	138.917	53.1	54.3	53.9	52.8	51.4	52	53.8	54.3	53.7	53.4	1.05367
138	846	C	15	5	41	43	141.92	160.42	138.953	53.7	54.6	54.4	53.7	52.9	53.8	55.6	55.9	55.6	55.5	1.13179
138	846	C	15	5	45	47	141.96	160.46	138.99	55.6	57.4	56.9	55.1	53.1	53.1	54.4	54.5	53.8	53.6	1.38119
138	846	C	15	5	49	51	142	160.5	139.027	51.6	52.9	52.4	51	49.3	49.8	51.5	52	51.7	51.4	0.853244
138	846	C	15	5	53	55	142.04	160.54	139.063	48.1	49.8	49.6	48.4	47.1	47.9	50	50.3	49.6	49.5	0.391179
138	846	C	15	5	57	59	142.08	160.58	139.098	39.5	40.1	39.8	39.1	38.6	40.3	42.6	43.2	43.6	44	-0.742827
138	846	C	15	5	61	63	142.12	160.62	139.133	40.8	42.3	42.2	41.6	41	42.7	45.1	45.5	45.5	46.1	-0.572479
138	846	C	15	5	65	67	142.16	160.66	139.169	42.6	43.7	43.5	42.4	41.4	43	45.3	45.8	45.7	45.9	-0.336254
138	846	C	15	5	69	71	142.2	160.7	139.205	46.4	47.8	47.1	45.5	44	45	46.9	46.9	46.5	47.1	0.163476
138	846	C	15	5	73	75	142.24	160.74	139.24	43.9	44.9	44.2	42.7	41.2	42.3	44.4	44.6	44.1	44.8	-0.166836
138	846	C	15	5	77	79	142.28	160.78	139.275	43.4	45	44.6	43	41.5	42.5	44.6	44.9	44.5	45	-0.233644
138	846	C	15	5	81	83	142.32	160.82	139.31	42.2	43	42.6	41.2	39.6	40.5	42.5	43.2	43	42.8	-0.392678
138	846	C	15	5	85	87	142.36	160.86	139.346	45.7	46.7	46.4	44.8	42.9	43.7	45.8	46.2	45.7	45.7	0.0675269
138	846	C	15	5	89	91	142.4	160.9	139.382	49.3	50.6	49.8	47.7	45.4	45.7	47.5	48	47.5	47.2	0.540907
138	846	C	15	5	93	95	142.44	160.94	139.417	50.1	50.8	50.4	49.2	47.7	48.3	50	50.6	50.6	51	0.645378
138	846	C	15	5	97	99	142.48	160.98	139.452	52.4	53.3	52.4	50.5	48.3	48.4	49.9	50.1	49.9	50.1	0.947479
138	846	C	15	5	101	103	142.52	161.02	139.487	51.5	51.9	51.1	49.5	47.6	47.9	49.5	49.9	49.5	49.6	0.827971
138	846	C	15	5	105	107	142.56	161.06	139.523	57	58.6	58.2	56.5	54.6	54.7	56	56.2	55.7	55.5	1.55168
138	846	C	15	5	109	111	142.6	161.1	139.559	53	54.1	53.2	51.2	48.9	49	50.5	50.6	50	49.5	1.02374
138	846	C	15	5	113	115	142.64	161.14	139.594	48	49.1	48.7	47.3	45.8	46.5	48.2	48.7	48.5	48.7	0.364044
138	846	C	15	5	117	119	142.68	161.18	139.629	48.3	49.7	49.1	47.3	45.3	45.6	47.3	47.5	47.1	47	0.40264
138	846	C	15	5	121	123	142.72	161.22	139.664	49.3	50.6	50.1	48.4	46.4	46.8	48.3	48.5	48.1	48.3	0.533462
138	846	C	15	5	125	127	142.76	161.26	139.7	44.8	45.5	44.8	43.5	41.9	42.7	44.7	45.2	44.9	44.8	-0.0603567
138	846	C	15	5	129	131	142.8	161.3	139.735	47	48	47.2	45.5	43.7	44.3	46.1	46.5	46.3	46.5	0.228569
138	846	C	15	5	133	135	142.84	161.34	139.771	43.7	44.4	43.9	42.9	42	43.3	45.5	46.1	46.2	46.7	-0.207146
138	846	C	15	5	137	139	142.88	161.38	139.806	47.7	49	48.5	47.1	45.6	46.4	48.2	48.4	47.9	47.7	0.318935
138	846	C	15	5	141	143	142.92	161.42	139.841	56.2	57.5	57	55.4	53.9	54.4	56.1	56.3	55.6	55.3	1.4379
138	846	C	15	5	145	147	142.96	161.46	139.877	53.2	54.9	54.8	53.7	52.4	53.2	54.9	55.2	55	54.8	1.04171
138	846	C	15	6	1	3	143.02	161.52	139.93	57.6	59.7	59.1	56.9	54.6	54.6	55.9	55.8	55.2	55.2	1.62003
138	846	C	15	6	5	7	143.06	161.56	139.965	52.3	53.5	53.2	51.7	50.2	51.1	52.7	52.8	52.8	53	0.92081
138	846	C	15	6	9	11	143.1	161.6	140	57.2	59.1	58.5	56.7	54.5	54.7	56.1	56.4	55.7	54.8	1.56547
138	846	C	15	6	13	15	143.14	161.64	140.036	59.8	61.3	60.8	59.1	57.2	57.2	58.5	58.8	58.2	57.8	1.9071
138	846	C	15	6	17	19	143.18	161.68	140.072	47.2	47.7	47.5	46.7	45.9	47.3	49.6	50.1	50	50.9	0.246079
138	846	C	15	6	21	23	143.22	161.72	140.109	50.9	51.4	50.9	49.9	48.6	49.5	51.4	51.8	51.5	51.8	0.732634
138	846	C	15	6	25	27	143.26	161.76	140.146	54	55.7	55.3	53.9	52.4	53	54.5	54.7	54.4	54.2	1.14014
138	846	C	15	6	29	31	143.3	161.8	140.183	51.5	52.5	52	50.8	49.8	50.9	52.7	52.9	52.7	52.8	0.809824
138	846	C	15	6	33	35	143.34	161.84	140.22	49.8	51.2	50.9	49.8	48.7	49.7	51.4	51.5	51.6	52.1	0.584914
138	846	C	15	6	37	39	143.38	161.88	140.257	46.6	48.6	48.6	47.4	46.3	47.5	49.7	49.7	49.6	49.8	0.162374
138	846	C	15	6	41	43	143.42	161.92	140.296	42.5	44.1	44	43.1	42	43.4	45.7	46.3	46	45.9	-0.378743
138	846	C	15	6	45	47	143.46	161.96	140.333	41.7	43.6	43.7	42.7	41.6	43.1	45.4	45.9	45.8	45.9	-0.485076
138	846	C	15	6	49	51	143.5	162	140.371	43.6	45.7	45.8	44.7	43.4	44.8	46.9	47.3	46.8	47.1	-0.235676
138	846	C	15	6	53	55	143.54	162.04	140.409	48.4	49.8	49.5	48.2	46.9	47.9	49.8	50.1	49.8	49.7	0.395807
138	846	C	15	6	57	59	143.58	162.08	140.447	46.5	47.8	47.8	47	46.1	47.3	49.3	49.9	50	50.8	0.144546
138	846	C	15	6	61	63	143.62	162.12	140.484	53.5	54.9	55.1	54.3	53.2	54.3	56.2	56.7	56.3	56.5	1.06589
138	846	C	15	6	65	67	143.66	162.16	140.522	52	53.5	53.3	52.4	51.6	52.7	54.4	54.8	55.1	55.8	0.867325
138	846	C	15	6	69	71	143.7	162.2	140.56	53.4	55.5	55.8	55.1	54.4	55.7	57.7	58	57.6	57.9	1.05085
138	846	C	15	6	73	75	143.74	162.24	140.598	53.8	55	55.1	54.6	53.9	55.1	57	57.6	57.4	57.7	1.10262
138	846	C	15	6	77	79	143.78	162.28	140.635	57.2	58.1	57.9	57	55.9	56.6	58.1	58.5	58.2	58.3	1.54965
138	846	C	15	6	81	83	143.82	162.32	140.673	52.3	53	52.7	51.6	50.3	51.1	53	53.3	52.6	53.1	0.903129
138	846	C	15	6	85	87	143.86	162.36	140.711	61.8	63.4	63	61.5	59.8	59.9	61.1	61.1	60.7	60.9	2.15385
138	846	C	15	6	89	91	143.9	162.4	140.749	59.7	61.5	60.9	59.1	56.7	56.5	57.7	57.8	57.4	56.9	1.87624
138	846	C	15	6	93	95	143.94	162.44	140.786	53.7	56	55.8	54.3	52.6	53.1	54.9	55.3	54.5	54.1	1.08479
138	846	C	15	6	97	99	143.98	162.48	140.819	55.6	57.5	56.6	54.5	52.2	52.1	53.5	53.5	52.8	52.5	1.33419
138	846	C	15	6	101	103	144.02	162.52	140.852	53.4	55.5	55.3	54.1	52.6	53.3	55	55	54.4	54.6	1.0434
138	846	C	15	6	105	107	144.06	162.56	140.885	48.7	50.9	51.1	50.4	49.7	51.2	53.2	53.8	53.9	54.5	0.423235
138	846	C	15	6	109	111	144.1	162.6	140.919	51.8	54.1	54.2	53.2	52.2	53.3	55.2	55.5	55.4	55.7	0.830738
138	846	C	15	6	113	115	144.14	162.64	140.952	47.7	49.8	49.8	49	48	49.3	51.3	51.6	51.3	51.2	0.289621
138	846	C	15	6	117	119	144.18	162.68	140.985	43	44.8	45	44.4	43.7	45.6	47.7	48.1	48.5	48.9	-0.330548
138	846	C	15	6	121	123	144.22	162.72	141.018	47.8	49.9	50.1	49.3	48.5	49.8	51.8	52.1	51.7	51.8	0.300935
138	846	C	15	6	125	127	144.26	162.76	141.051	49.9	52.3	52.6	51.8	51	52.2	54.2	54.5	54.3	54.5	0.576685
138	846	C	15	6	129	131	144.3	162.8	141.084	54.5	56.7	56.6	55.7	54.7	55.7	57.4	57.5	57.1	57.5	1.18182
138	846	C	15	6	133	135	144.34	162.84	141.118	60	62	62.1	61.2	60.4	61.5	63.1	63.3	63.1	63.3	1.90553
138	846	C	15	6	137	139	144.38	162.88	141.151	60.9	62.9	63.1	62.4	61.6	62.5	64.1	64.5	63.9	63.6	2.02318
138	846	C	15	6	141	143	144.42	162.92	141.184	57.4	58.8	58.8	58.2	57.6	58.9	60.6	61.1	61.1	61.2	1.56111
138	846	C	15	6	145	147	144.46	162.96	141.219	53.9	55	54.7	54	53.3	54.5	56.2	56.5	56.5	57	1.09904
138	846	C	15	7	1	3	144.52	163.02	141.271	47.3	48.7	48.6	47.9	47.4	49.9	53.3	53.8	53.7	53.9	0.228079
138	846	C	15	7	5	7	144.56	163.06	141.306	55.8	57.6	57.8	57	56.1	57.1	58.7	58.8	58.4	58.4	1.34705
138	846	C	15	7	9	11	144.6	163.1	141.341	56.3	58.5	58.7	58	57.3	58.4	60	60.1	59.7	60	1.41199
138	846	C	15	7	13	15	144.64	163.14	141.375	59.3	61.5	61.4	60.3	59.2	59.9	61.2	61.2	60.6	60.2	1.80632
138	846	C	15	7	17	19	144.68	163.18	141.41	54.7	57.3	57.3	56.4	55.5	56.5	58.2	58.2	57.6	57.6	1.19933
138	846	C	15	7	21	23	144.72	163.22	141.445	56.6	59	59.3	58.5	57.7	58.8	60.4	60.3	59.6	59.7	1.44873
138	846	C	15	7	25	27	144.76	163.26	141.48	51	52.7	52.7	51.9	51.2	52.6	54.5	54.8	54.6	54.8	0.709981
138	846	C	15	7	29	31	144.8	163.3	141.514	51.6	53.4	53.4	52.6	51.7	52.9	54.6	54.8	54.8	55.2	0.788102
138	846	C	15	7	33	35	144.84	163.34	141.549	48.3	50.3	50	48.6	47.5	48.5	50.4	50.3	49.7	49.8	0.352387
138	846	C	15	7	37	39	144.88	163.38	141.584	45.2	46.9	46.9	45.7	44.6	45.9	47.9	48	47.4	47.7	-0.0569777
138	846	C	15	7	41	43	144.92	163.42	141.618	39.9	41.6	41.2	39.8	38.3	39.6	41.7	41.8	41.3	41.3	-0.756199
138	846	C	15	7	45	47	144.96	163.46	141.651	37.8	39.2	38.8	37.5	36.2	37.7	39.8	40	39.7	39.8	-1.03381
138	846	C	15	7	49	51	145	163.5	141.719	34.8	36.2	36.2	35.2	34.3	36.1	38.4	38.6	38.5	39.2	-1.43
138	846	C	16	1	13	15	145.14	165.84	142.985	46.8	48.1	47.9	46.6	45	45.8	47.8	48.3	47.8	47.6	0.0965946
138	846	C	16	1	17	19	145.18	165.88	143.019	48.6	49.3	48.8	47.8	46.8	47.9	49.8	50.1	49.7	49.6	0.332819
138	846	C	16	1	21	23	145.22	165.92	143.053	48	49.3	48.9	47.5	45.9	46.5	48.1	48.4	48.4	48.9	0.252837
138	846	C	16	1	25	27	145.26	165.96	143.087	61.2	62.1	61.5	60.4	59.1	59.7	61.2	61.5	61.3	61.8	1.99104
138	846	C	16	1	29	31	145.3	166	143.12	60.6	62	61.4	59.7	58	58.4	59.7	59.8	59.4	59.6	1.91106
138	846	C	16	1	33	35	145.34	166.04	143.154	60.2	61.1	60.7	59.8	58.7	59.3	60.9	61.2	60.9	60.9	1.85743
138	846	C	16	1	37	39	145.38	166.08	143.188	54.8	56	56	55.3	54.9	56.3	58.1	58.7	59	59.6	1.14503
138	846	C	16	1	41	43	145.42	166.12	143.222	66.1	68.1	67.9	66.3	64.5	64.5	65.7	65.6	64.7	64.9	2.63291
138	846	C	16	1	45	47	145.46	166.16	143.256	58.8	60	59.8	59.2	58.4	59.3	60.8	61.4	61.2	60.9	1.67018
138	846	C	16	1	49	51	145.5	166.2	143.289	60.9	61.8	61.3	60.2	59	59.6	61	61	60.5	60.4	1.94593
138	846	C	16	1	53	55	145.54	166.24	143.323	56.5	56.8	56.1	55.3	54.4	55.2	56.8	57.5	57.2	57	1.36529
138	846	C	16	1	57	59	145.58	166.28	143.356	58.2	60	59.7	58.3	56.9	57.5	59	59.1	58.6	58.8	1.58834
138	846	C	16	1	61	63	145.62	166.32	143.392	53.9	55.3	54.9	53.8	52.6	53.5	55.3	55.5	55.1	55.7	1.02087
138	846	C	16	1	65	67	145.66	166.36	143.427	47.2	48.3	47.8	46.5	45.2	46.2	48.1	48.6	48.1	47.9	0.137198
138	846	C	16	1	69	71	145.7	166.4	143.463	45	46	45.3	44	42.6	43.6	45.5	45.9	45.5	45.6	-0.153589
138	846	C	16	1	73	75	145.74	166.44	143.498	45	46.3	46.1	44.9	43.7	44.7	46.7	47	46.8	47.1	-0.15452
138	846	C	16	1	77	79	145.78	166.48	143.534	39	40.1	39.6	38.1	36.6	37.8	40	40.5	40.5	40.8	-0.945968
138	846	C	16	1	81	83	145.82	166.52	143.568	41.7	42.9	42.5	41.4	40.3	41.7	44	44.3	44	44	-0.591165
138	846	C	16	1	85	87	145.86	166.56	143.604	45.7	46.5	45.8	44.3	42.9	44	46.1	46.2	45.8	46	-0.0650845
138	846	C	16	1	89	91	145.9	166.6	143.64	49.2	50.4	49.9	48.5	47	47.9	49.8	49.9	49.5	49.4	0.39512
138	846	C	16	1	93	95	145.94	166.64	143.675	48.6	50	49.3	47.7	45.9	46.6	48.6	48.9	48.3	48.1	0.315138
138	846	C	16	1	97	99	145.98	166.68	143.711	46.3	47.8	47.5	46.3	45	46.1	48.1	48.6	48.3	48.2	0.0111754
138	846	C	16	1	101	103	146.02	166.72	143.746	46.6	48.1	47.8	46.6	45.4	46.5	48.6	49	48.6	48.5	0.0497707
138	846	C	16	1	105	107	146.06	166.76	143.781	46.2	46.6	45.8	44.6	43.6	44.8	46.9	47.3	47.2	47.4	-0.00386109
138	846	C	16	1	109	111	146.1	166.8	143.816	45.6	46.1	45.4	44.2	43	44.2	46.2	46.5	46.5	47	-0.0838434
138	846	C	16	1	113	115	146.14	166.84	143.852	47.2	48.7	48.4	47.2	45.8	46.8	48.8	49	48.9	49.2	0.126031
138	846	C	16	1	117	119	146.18	166.88	143.887	47.4	48.7	48.3	47.3	46.2	47.4	49.4	49.8	49.6	50.1	0.151451
138	846	C	16	1	121	123	146.22	166.92	143.923	54.4	55.7	55.1	53.4	51.8	52.5	54.2	54.2	53.8	54.2	1.07279
138	846	C	16	1	125	127	146.26	166.96	143.957	57.3	58.6	58.3	57.3	56.2	57.1	58.7	59.1	58.8	59.1	1.45394
138	846	C	16	1	129	131	146.3	167	143.993	58.7	59.8	59.2	57.8	56.2	56.4	57.7	58.2	57.9	57.2	1.63747
138	846	C	16	1	133	135	146.34	167.04	144.027	58.1	58.3	57.5	56.3	55	55.4	57	57.4	57.2	57.4	1.55748
138	846	C	16	1	137	139	146.38	167.08	144.062	60.8	61.7	61.2	60.2	58.9	59.4	60.9	61.3	60.8	60.9	1.91229
138	846	C	16	1	141	143	146.42	167.12	144.096	65.2	66	65.6	64.6	63.4	64	65.4	65.6	65.3	66.2	2.49107
138	846	C	16	1	145	147	146.46	167.16	144.132	60.4	60.6	59.9	59	57.9	58.6	60.2	60.7	60.4	60.6	1.85772
138	846	C	16	2	1	3	146.52	167.22	144.184	54.9	57.3	57.1	55.6	53.8	54.2	55.8	56.1	55.7	55	1.13169
138	846	C	16	2	5	7	146.56	167.26	144.218	47.9	48.7	48	46.3	44.7	45.5	47.4	47.6	47.3	47.7	0.208486
138	846	C	16	2	9	11	146.6	167.3	144.254	46.1	47.3	46.7	45.6	44.6	45.9	47.8	48.4	48.6	48.6	-0.0295996
138	846	C	16	2	13	15	146.64	167.34	144.288	45.3	45.5	44.6	43.3	42.3	43.5	45.5	45.9	46	46.2	-0.135932
138	846	C	16	2	17	19	146.68	167.38	144.322	45.6	47	46.4	44.7	42.9	43.8	45.7	45.9	45.4	45.7	-0.0973372
138	846	C	16	2	21	23	146.72	167.42	144.355	39.6	40.7	40.3	39	37.9	39.3	41.6	42	41.9	42.1	-0.888785
138	846	C	16	2	25	27	146.76	167.46	144.389	39.6	40.4	40.1	39	37.7	39.1	41.4	41.7	41.4	41.3	-0.889716
138	846	C	16	2	29	31	146.8	167.5	144.422	41	42.4	42.2	41	39.7	41.1	43.3	43.7	43.5	43.6	-0.706192
138	846	C	16	2	33	35	146.84	167.54	144.455	40.2	41.4	40.9	39.7	38.5	39.9	42.1	42.4	42.3	42.9	-0.812525
138	846	C	16	2	37	39	146.88	167.58	144.489	41.1	42.7	42.4	41.2	40.1	41.6	43.9	44.3	43.9	44	-0.694878
138	846	C	16	2	41	43	146.92	167.62	144.522	46.1	47.9	47.9	47	46.2	47.6	49.6	50.1	50.1	50.5	-0.0370444
138	846	C	16	2	45	47	146.96	167.66	144.555	47.2	49.4	49.5	48.7	47.9	49.6	51.7	51.8	51.6	52.2	0.106953
138	846	C	16	2	49	51	147	167.7	144.588	48.7	50.7	51	50.2	49.5	51.1	53.2	53.5	53.1	53	0.303652
138	846	C	16	2	53	55	147.04	167.74	144.622	52	53.6	53.3	52.4	51.6	52.9	54.8	55.3	55.3	55.3	0.737506
138	846	C	16	2	57	59	147.08	167.78	144.655	52.1	53.9	53.5	52.3	51.3	52.3	54.1	54.4	54.3	54.2	0.749751
138	846	C	16	2	61	63	147.12	167.82	144.688	47.2	48.8	48.7	47.8	46.8	48.2	50.4	50.7	50.3	50.9	0.103231
138	846	C	16	2	65	67	147.16	167.86	144.721	48.5	50	49.8	48.6	47.3	48.4	50.4	50.7	50.2	50.6	0.273579
138	846	C	16	2	69	71	147.2	167.9	144.754	47.2	48.6	48.5	47.4	46.2	47.5	49.8	50	49.8	50.3	0.10137
138	846	C	16	2	73	75	147.24	167.94	144.786	48.6	49.5	48.9	47.9	46.9	48.3	50.4	50.7	50.6	50.8	0.284893
138	846	C	16	2	77	79	147.28	167.98	144.82	53.3	55.2	54.8	53.4	51.8	52.4	54.1	54.3	53.8	53.6	0.903201
138	846	C	16	2	81	83	147.32	168.02	144.852	54.2	55.7	55.1	53.6	52	52.4	54.1	54.4	54.2	54.6	1.02085
138	846	C	16	2	85	87	147.36	168.06	144.885	53.9	55.5	55.4	54.4	53.2	53.9	55.7	56.3	56	55.5	0.980391
138	846	C	16	2	89	91	147.4	168.1	144.918	49.9	50.5	49.9	48.6	47.3	48.2	49.9	50.3	50.5	50.4	0.452449
138	846	C	16	2	93	95	147.44	168.14	144.951	51.4	51.7	51.1	49.9	48.7	49.7	51.7	52.2	51.9	52.3	0.649148
138	846	C	16	2	97	99	147.48	168.18	144.984	54.3	55.9	55.5	54	52.5	53.2	55	55.5	55.2	55	1.0303
138	846	C	16	2	101	103	147.52	168.22	145.016	54.6	56.6	55.8	53.8	51.7	51.8	53.3	53.4	52.8	52.4	1.0689
138	846	C	16	2	105	107	147.56	168.26	145.048	47.8	49.3	49.1	48.2	47.3	48.7	50.8	51.3	51.1	51.3	0.172046
138	846	C	16	2	109	111	147.6	168.3	145.08	50.2	51.6	51.2	50	48.9	49.9	51.8	52	51.7	51.8	0.487322
138	846	C	16	2	113	115	147.64	168.34	145.112	52.5	53.3	52.7	51.6	50.6	51.8	53.6	54	53.8	54.3	0.789423
138	846	C	16	2	117	119	147.68	168.38	145.144	55.9	56.6	56.4	55.7	54.7	55.7	57.5	58.3	58	58.1	1.23645
138	846	C	16	2	121	123	147.72	168.42	145.174	49.7	50.6	50.2	49	47.6	48.6	50.6	51	50.7	51.2	0.418654
138	846	C	16	2	125	127	147.76	168.46	145.205	58.6	60.1	60	58.9	57.7	58.6	60.2	60.4	60	60.9	1.59032
138	846	C	16	2	129	131	147.8	168.5	145.237	59.7	61.3	61	59.9	58.8	59.5	61	61.3	60.9	61.5	1.73432
138	846	C	16	2	133	135	147.84	168.54	145.268	59.9	61.1	60.6	59.4	58.3	59.1	60.6	61	60.6	60.6	1.75974
138	846	C	16	2	137	139	147.88	168.58	145.299	60.2	60.9	60.4	59.3	58.3	59.1	60.5	60.8	60.8	61.2	1.79834
138	846	C	16	2	141	143	147.92	168.62	145.33	62.3	64.5	64.4	63.1	61.8	62.3	63.7	63.8	63.2	63.2	2.07409
138	846	C	16	3	1	3	148.02	168.72	145.411	51.2	53.3	53.2	52.1	50.9	51.8	53.6	53.7	53.2	53.1	0.609304
138	846	C	16	3	5	7	148.06	168.76	145.446	48.8	50.8	50.8	50.1	49.5	51.1	53.1	53.5	53.3	53.7	0.292166
138	846	C	16	3	9	11	148.1	168.8	145.482	49.5	51.4	51.2	50.1	48.9	50	51.8	51.9	51.5	51.3	0.383463
138	846	C	16	3	13	15	148.14	168.84	145.518	45.3	47.4	47.5	46.6	45.8	47.4	49.6	50	49.6	49.8	-0.17083
138	846	C	16	3	17	19	148.18	168.88	145.554	45.7	47.3	47.1	45.9	44.9	46.2	48.4	48.5	48.2	49	-0.11906
138	846	C	16	3	21	23	148.22	168.92	145.59	44.9	46.8	46.8	46.2	45.6	47.5	49.7	50.3	50.1	50.3	-0.225393
138	846	C	16	3	25	27	148.26	168.96	145.625	46	47.5	47.4	46.5	45.8	47.4	49.5	50	50	50.5	-0.081395
138	846	C	16	3	29	31	148.3	169	145.661	46.1	47.1	46.8	45.8	44.9	46.2	48.3	48.7	48.6	48.9	-0.0691503
138	846	C	16	3	33	35	148.34	169.04	145.697	57.3	59.3	59	57.6	56.2	56.8	58.3	58.5	57.9	57.7	1.40555
138	846	C	16	3	37	39	148.38	169.08	145.733	50	51.5	51.5	50.8	50.1	51.4	53.4	54	54	54	0.442825
138	846	C	16	3	41	43	148.42	169.12	145.769	43.1	44.7	45	44.5	44	45.9	48.3	48.8	49	49.5	-0.467201
138	846	C	16	3	45	47	148.46	169.16	145.805	50.5	51.7	51.5	50.5	49.4	50.6	52.5	52.9	52.6	53	0.50684
138	846	C	16	3	49	51	148.5	169.2	145.842	52.5	53.9	53.4	52.2	51	52	53.9	54.3	54	53.9	0.769415
138	846	C	16	3	53	55	148.54	169.24	145.88	62.4	63.7	63.3	61.9	60.3	60.6	62.1	62.3	61.8	61.9	2.07284
138	846	C	16	3	57	59	148.58	169.28	145.918	58.9	60.2	59.7	58.3	56.7	57.2	58.8	59.1	58.8	58.8	1.61077
138	846	C	16	3	61	63	148.62	169.32	145.956	58	59.6	59.1	57.7	56	56.5	58.1	58.3	57.6	57.4	1.49126
138	846	C	16	3	65	67	148.66	169.36	145.993	53.8	54.2	53.6	52.4	51.2	52.1	53.8	54.2	54.1	54.3	0.936971
138	846	C	16	3	69	71	148.7	169.4	146.03	60.9	62.1	61.6	60.2	58.7	59.1	60.5	60.8	60.5	60.9	1.87149
138	846	C	16	3	73	75	148.74	169.44	146.065	62.8	64.4	63.7	62	60.2	60.4	61.8	62	61.3	61	2.12089
138	846	C	16	3	77	79	148.78	169.48	146.099	58.3	59.2	58.6	57.5	56.4	57.1	58.7	59	59.1	59.4	1.52707
138	846	C	16	3	81	83	148.82	169.52	146.133	64.4	64.8	64.2	62.9	61.5	61.9	63.3	63.6	63.1	63.4	2.32983
138	846	C	16	3	85	87	148.86	169.56	146.167	63.3	65	64.4	62.7	61	61.4	62.6	62.7	62.6	62.7	2.18397
138	846	C	16	3	89	91	148.9	169.6	146.202	66.7	68.7	68.2	66.6	65.2	65.6	66.7	66.8	66.2	66.4	2.631
138	846	C	16	3	93	95	148.94	169.64	146.236	66.1	67	66.6	65.5	64.4	65	66.3	66.8	66.6	66.4	2.55102
138	846	C	16	3	97	99	148.98	169.68	146.27	69.3	70.3	69.5	68.1	66.8	67.1	68.3	68.4	68	68.4	2.9717
138	846	C	16	3	101	103	149.02	169.72	146.301	68.5	69.7	69.1	67.5	66	66.2	67.3	67.4	66.8	67.5	2.86536
138	846	C	16	3	105	107	149.06	169.76	146.334	68.4	69.4	68.9	67.7	66.4	66.8	68.1	68.2	67.6	68.2	2.85126
138	846	C	16	3	109	111	149.1	169.8	146.368	72.5	74.3	73.7	71.8	69.7	69.4	70.3	70.1	69.2	69.3	3.39051
138	846	C	16	3	113	115	149.14	169.84	146.401	60.6	62	61.2	59.6	57.9	58.3	59.7	59.9	59.6	59.4	1.82172
138	846	C	16	3	117	119	149.18	169.88	146.434	58.9	60.8	60.5	58.9	57.2	57.7	59.1	59	58.4	58.4	1.59681
138	846	C	16	3	121	123	149.22	169.92	146.467	60	62.1	61.8	60.6	59.2	59.8	61.4	61.5	61.1	61	1.74081
138	846	C	16	3	125	127	149.26	169.96	146.501	54.1	55.6	55.3	54.1	52.9	53.9	55.7	55.9	55.8	56.1	0.962538
138	846	C	16	3	129	131	149.3	170	146.533	52	53.5	53.3	52.3	51.5	52.8	54.9	55.3	55.1	55.3	0.684927
138	846	C	16	3	133	135	149.34	170.04	146.567	53.3	55.7	55.9	54.8	53.9	55.1	57	57.1	56.6	57.1	0.855275
138	846	C	16	3	137	139	149.38	170.08	146.601	49.3	50.8	50.9	50.1	49.3	50.8	53	53.3	52.9	53	0.327333
138	846	C	16	3	141	143	149.42	170.12	146.634	52.6	54.1	53.7	52.8	51.8	52.9	54.8	55.4	54.8	54.8	0.761186
138	846	C	16	3	145	147	149.46	170.16	146.668	51.4	53.3	53.2	52.2	51.2	52.5	54.5	54.7	54.3	54.3	0.602152
138	846	C	16	4	1	3	149.52	170.22	146.72	49.6	52.4	52.2	51.4	50.2	51.4	53.4	53.6	53.3	53.5	0.363601
138	846	C	16	4	5	7	149.56	170.26	146.755	51.8	53.6	53.7	52.9	52	53.6	55.6	55.9	55.7	56.3	0.652527
138	846	C	16	4	9	11	149.6	170.3	146.789	51.5	53.6	53.6	52.8	52	53.5	55.5	55.9	55.9	56.4	0.612071
138	846	C	16	4	13	15	149.64	170.34	146.824	51.1	53.3	53.7	53.4	53.2	55.2	57.3	57.9	58	58.4	0.558439
138	846	C	16	4	17	19	149.68	170.38	146.86	49.7	51.4	51.6	51.2	50.7	52.4	54.4	54.9	55	55.8	0.373054
138	846	C	16	4	21	23	149.72	170.42	146.895	52.3	54.2	54.3	53.4	52.7	54.2	56.3	56.7	56.3	56.7	0.714681
138	846	C	16	4	25	27	149.76	170.46	146.93	57.6	59	58.9	58.1	57	57.8	59.5	59.8	59.4	59.3	1.41204
138	846	C	16	4	29	31	149.8	170.5	146.965	53.2	55.5	55.6	54.8	54.1	55.5	57.4	57.7	57.7	57.9	0.831397
138	846	C	16	4	33	35	149.84	170.54	147.001	47.7	49.1	49.3	48.8	48.2	50	52.3	52.9	52.7	53.2	0.105826
138	846	C	16	4	37	39	149.88	170.58	147.036	43.8	45.8	46.4	46.2	46.2	48.6	51.1	51.6	51.8	52.6	-0.408941
138	846	C	16	4	41	43	149.92	170.62	147.07	53.4	55.4	55.3	54.1	52.9	53.9	55.7	56.1	55.9	55.8	0.854956
138	846	C	16	4	45	47	149.96	170.66	147.103	54.4	56.5	56.3	55.1	53.8	54.7	56.4	56.6	56.3	56.3	0.985778
138	846	C	16	4	49	51	150	170.7	147.137	50.4	52	51.7	50.5	49.3	50.4	52.3	52.4	51.9	52	0.457836
138	846	C	16	4	53	55	150.04	170.74	147.171	47.8	49.4	49.2	48	46.9	48.2	50.2	50.2	49.9	50.3	0.114348
138	846	C	16	4	57	59	150.08	170.78	147.205	48.3	50.8	51.1	50.4	49.7	51.4	53.5	53.7	53.6	54.1	0.179294
138	846	C	16	4	61	63	150.12	170.82	147.239	46.2	48.6	49.1	48.4	47.9	49.9	52	52.2	52	52.1	-0.0983177
138	846	C	16	4	65	67	150.16	170.86	147.272	50.1	51.7	51.7	51.1	50.5	52	54.1	54.4	54.3	54.5	0.414588
138	846	C	16	4	69	71	150.2	170.9	147.306	50	52.2	52.5	51.9	51.3	53	55.2	55.6	55.4	55.5	0.400482
138	846	C	16	4	73	75	150.24	170.94	147.34	47.4	50.3	51.2	50.9	50.7	53.2	55.6	56.3	56.2	56.2	0.056994
138	846	C	16	4	77	79	150.28	170.98	147.373	52.9	54.7	54.8	54.1	53.2	54.7	56.7	56.9	56.6	56.5	0.780704
138	846	C	16	4	81	83	150.32	171.02	147.408	51.6	53.2	53.3	52.6	51.8	53.1	55.1	55.3	55	55.1	0.608495
138	846	C	16	4	85	87	150.36	171.06	147.441	52.6	54.1	54	52.9	51.9	52.9	54.7	55	54.6	54.7	0.739317
138	846	C	16	4	89	91	150.4	171.1	147.475	48.4	49.2	48.8	48	47.2	48.6	50.6	51.1	51	51.3	0.185024
138	846	C	16	4	93	95	150.44	171.14	147.509	44.7	45.8	45.8	45.1	44.7	46.6	48.9	49.5	49.5	50.1	-0.303392
138	846	C	16	4	97	99	150.48	171.18	147.542	48.2	49.3	49.1	48.3	47.5	48.9	51	51.5	51.4	51.4	0.156813
138	846	C	16	4	101	103	150.52	171.22	147.577	50.1	51.3	51.2	50.3	49.4	50.5	52.4	52.7	52.3	52.7	0.406213
138	846	C	16	4	105	107	150.56	171.26	147.61	51.8	53.1	52.6	51.4	50.2	51.2	53.1	53.5	53.2	53.3	0.629262
138	846	C	16	4	109	111	150.6	171.3	147.644	51.7	53.1	52.9	51.7	50.5	51.5	53.4	53.7	53.5	53.5	0.615156
138	846	C	16	4	113	115	150.64	171.34	147.677	50.3	51.8	51.7	50.9	50	51.3	53.3	53.5	53.6	54.2	0.429771
138	846	C	16	4	117	119	150.68	171.38	147.711	41.6	42.4	42.1	41.3	40.5	42.1	44.5	45.1	45.3	45.9	-0.717409
138	846	C	16	4	121	123	150.72	171.42	147.745	44.1	46	46.2	45.5	44.9	46.7	49	49.5	49.5	50.2	-0.388958
138	846	C	16	4	125	127	150.76	171.46	147.779	44.3	46.1	46.3	45.7	45.3	47.1	49.6	50	50.1	50.5	-0.363538
138	846	C	16	4	129	131	150.8	171.5	147.813	47.4	49.7	49.8	48.8	47.8	49.2	51.3	51.5	50.9	51	0.0439655
138	846	C	16	4	133	135	150.84	171.54	147.846	44.7	46.6	46.6	45.8	44.9	46.5	48.7	49	48.8	49	-0.312698
138	846	C	16	4	137	139	150.88	171.58	147.88	49	51.4	51.5	50.5	49.4	50.8	52.8	53.1	52.6	52.2	0.252909
138	846	C	16	4	141	143	150.92	171.62	147.914	50	51.4	51.2	50.2	49.3	50.6	52.6	53	52.7	52.8	0.383731
138	846	C	16	4	145	147	150.96	171.66	147.947	49.2	50.4	50.3	49.6	48.9	50.4	52.5	52.9	53.1	53.8	0.277398
138	846	C	16	5	1	3	151.02	171.72	147.999	49.3	51.2	51.4	50.7	50.2	51.8	53.8	54.3	54.2	54.8	0.289178
138	846	C	16	5	5	7	151.06	171.76	148.035	52	53.8	54.1	53.4	52.6	54.1	56.1	56.3	56	56.6	0.64398
138	846	C	16	5	9	11	151.1	171.8	148.07	50.4	52.2	52.5	52	51.7	53.5	55.6	56.1	56.3	57	0.432245
138	846	C	16	5	13	15	151.14	171.84	148.106	50.9	52.1	52.2	51.7	51.1	52.8	54.9	55.4	55.6	56.3	0.49719
138	846	C	16	5	17	19	151.18	171.88	148.141	51.9	53.7	54	53.3	52.7	54.4	56.5	56.8	56.8	57.7	0.628013
138	846	C	16	5	21	23	151.22	171.92	148.176	50.3	52.2	52.2	51.3	50.4	51.8	53.8	54.1	54	54.3	0.416278
138	846	C	16	5	25	27	151.26	171.96	148.211	48.7	50.7	50.7	49.9	49.3	50.8	52.8	53.4	53.6	53.2	0.204542
138	846	C	16	5	29	31	151.3	172	148.247	55.3	56.1	55.8	55.2	54.6	55.7	57.4	57.9	58.2	58.2	1.07318
138	846	C	16	5	33	35	151.34	172.04	148.283	55.4	56.8	56.7	55.8	54.7	55.6	57.3	57.6	57.5	57.6	1.08543
138	846	C	16	5	37	39	151.38	172.08	148.318	54.3	55.8	55.2	54.2	53.3	54	55.6	56.2	55.9	55.6	0.939567
138	846	C	16	5	41	43	151.42	172.12	148.354	54.4	55.6	55.2	54.2	52.9	53.5	55.4	55.7	55.1	55.3	0.951811
138	846	C	16	5	45	47	151.46	172.16	148.388	51.4	52.8	52.6	51.7	51	52.3	54.2	54.6	54.7	55.1	0.555622
138	846	C	16	5	49	51	151.5	172.2	148.424	48	49.3	49.1	48.6	48.1	49.7	51.9	52.5	52.5	52.6	0.106732
138	846	C	16	5	53	55	151.54	172.24	148.459	48.5	50.8	51.2	50.7	50.4	52.2	54.4	55	55	54.7	0.171677
138	846	C	16	5	57	59	151.58	172.28	148.495	44	46.4	47	46.7	46.6	48.9	51.4	52.1	52.4	52.9	-0.422141
138	846	C	16	5	61	63	151.62	172.32	148.529	47.1	49.8	50.2	49.4	48.8	50.6	52.6	53	53.3	53.1	-0.0146378
138	846	C	16	5	65	67	151.66	172.36	148.565	42.4	44.8	45.1	44.9	45	47.3	49.8	50.8	50.8	51.1	-0.634807
138	846	C	16	5	69	71	151.7	172.4	148.6	42.3	44.7	45.4	45.4	45.5	48.1	50.8	51.6	51.8	52.2	-0.648913
138	846	C	16	5	73	75	151.74	172.44	148.635	41.4	43.6	44.1	43.9	43.9	46.3	48.8	49.7	49.9	50.3	-0.768421
138	846	C	16	5	77	79	151.78	172.48	148.67	42.5	44.6	44.9	44.5	44.3	46.5	48.9	49.5	50	51	-0.624424
138	846	C	16	5	81	83	151.82	172.52	148.706	47.4	50	50.5	50.1	49.9	51.8	54	54.7	54.6	54.7	0.020235
138	846	C	16	5	85	87	151.86	172.56	148.742	47	48.4	48.6	48.2	47.6	49.2	51.4	52.1	52.1	52.3	-0.0333967
138	846	C	16	5	89	91	151.9	172.6	148.777	44.9	46.9	47.4	47.1	46.8	48.8	51.2	51.9	51.8	52	-0.311008
138	846	C	16	5	93	95	151.94	172.64	148.812	43.6	45.5	45.9	45.4	44.9	46.8	49.3	49.7	49.6	50.5	-0.483218
138	846	C	16	5	97	99	151.98	172.68	148.847	45	47.5	48.2	47.6	47.2	49.2	51.6	51.8	51.6	52.3	-0.299694
138	846	C	16	5	101	103	152.02	172.72	148.883	43.2	45.5	46	45.7	45.4	47.4	49.7	50.1	50.1	50.6	-0.53778
138	846	C	16	5	105	107	152.06	172.76	148.918	41.6	44	44.7	44.6	44.6	47.2	49.8	50.4	50.6	51	-0.749515
138	846	C	16	5	109	111	152.1	172.8	148.954	42	44.6	45.5	45.3	45.2	47.5	50.1	50.7	50.6	51.1	-0.697745
138	846	C	16	5	113	115	152.14	172.84	148.99	39.3	42.1	43.2	43.4	43.6	46.4	49.1	49.8	49.5	49.7	-1.05441
138	846	C	16	5	117	119	152.18	172.88	149.026	35.2	38.3	39.8	40	40.5	44.1	47.3	47.9	47.7	48.6	-1.59553
138	846	C	16	5	121	123	152.22	172.92	149.064	36.4	39.2	40.6	40.8	41.1	44.2	47.2	47.6	47.4	48.5	-1.43835
138	846	C	16	5	125	127	152.26	172.96	149.1	35.1	38.5	39.9	40.2	40.9	44.4	47.3	48.1	48.4	49	-1.61056
138	846	C	16	5	129	131	152.3	173	149.136	35.5	38.3	39.8	40.3	40.7	44.1	47.2	47.8	47.7	48.8	-1.55879
138	846	C	16	5	133	135	152.34	173.04	149.173	36.8	40	41.6	41.8	42.2	45.5	48.3	48.8	49.2	49.8	-1.38844
138	846	C	16	5	137	139	152.38	173.08	149.21	38.5	41.6	43.1	43.5	43.8	46.9	49.8	50.2	50.2	51	-1.16539
138	846	C	16	5	141	143	152.42	173.12	149.246	36.3	39.4	40.4	40.9	41.6	44.7	47.7	48.8	48.5	49.1	-1.45618
138	846	C	16	5	145	147	152.46	173.16	149.283	34.2	37.3	38.7	39	39.5	42.9	45.8	46.5	46.9	47.6	-1.73379
138	846	C	16	6	1	3	152.52	173.22	149.338	37.5	40.6	42.1	42.4	43	46.3	49.2	50	50.4	50.8	-1.3004
138	846	C	16	6	5	7	152.56	173.26	149.374	37.3	40.6	42.2	42.8	43.5	46.9	50.1	51	51.5	52	-1.32769
138	846	C	16	6	9	11	152.6	173.3	149.41	35.4	38.4	39.6	40.1	40.9	44.5	47.5	48.2	48.2	49	-1.57895
138	846	C	16	6	13	15	152.64	173.34	149.448	37.9	40.9	42.3	42.7	43.3	46.5	49.4	50.1	50	50.4	-1.25049
138	846	C	16	6	17	19	152.68	173.38	149.484	38.7	41.4	42.7	43.1	43.9	47.3	50.2	51	51.2	51.6	-1.14602
138	846	C	16	6	21	23	152.72	173.42	149.52	40.2	43.3	44.5	44.8	45.3	48.5	51.3	51.9	51.8	52.6	-0.949324
138	846	C	16	6	25	27	152.76	173.46	149.558	39.9	42.8	43.9	44	44.1	47	49.7	50.2	50	50.2	-0.989781
138	846	C	16	6	29	31	152.8	173.5	149.595	38.5	41	41.6	41.3	41.1	43.5	45.9	46.3	46.4	47.1	-1.17517
138	846	C	16	6	33	35	152.84	173.54	149.633	40.5	43.1	43.8	43.6	43.3	45.4	47.9	48.4	48.1	48.4	-0.91259
138	846	C	16	6	37	39	152.88	173.58	149.671	43.7	46.3	46.8	46.4	46	48	50.3	50.6	50.6	51.4	-0.491912
138	846	C	16	6	41	43	152.92	173.62	149.709	46.3	49	49.8	49.5	49.1	51.3	53.7	53.9	53.9	54.3	-0.150285
138	846	C	16	6	45	47	152.96	173.66	149.746	53.4	55.9	56.4	56	55.5	56.9	59	59.2	58.7	59.1	0.78423
138	846	C	16	6	49	51	153	173.7	149.784	49.4	52.4	53.4	53.5	53.6	55.9	58.2	58.7	58.5	58.8	0.256288
138	846	C	16	6	53	55	153.04	173.74	149.822	43.3	46.6	48.1	48.5	49.1	52.1	54.7	55.2	55.4	55.8	-0.548335
138	846	C	16	6	57	59	153.08	173.78	149.86	40.8	44.5	46.2	46.9	48	51.6	54.5	55.4	55.8	55.7	-0.878648
138	846	C	16	6	61	63	153.12	173.82	149.897	46.7	50	51.6	52.2	53.2	56.4	58.9	59.8	59.9	59.7	-0.102237
138	846	C	16	6	65	67	153.16	173.86	149.935	50	52.8	54.2	54.7	55.2	58	60.6	61	60.9	62	0.331617
138	846	C	16	6	69	71	153.2	173.9	149.973	46	49.2	50.9	51.5	52.3	55.7	58.4	59.1	59.2	59.4	-0.196325
138	846	C	16	6	73	75	153.24	173.94	150.011	49.4	52.5	54.1	54.9	55.9	59.5	62.4	63.1	63.4	64.2	0.250704
138	846	C	16	6	77	79	153.28	173.98	150.048	50.4	53.9	55.4	56	56.9	60.2	62.7	63.5	63.5	63.9	0.381527
138	846	C	16	6	81	83	153.32	174.02	150.086	51.2	54.2	55.6	56.1	56.8	59.8	62.1	62.8	62.8	62.8	0.485998
138	846	C	16	6	85	87	153.36	174.06	150.124	57.6	60.4	61.6	62	62.4	65	67.3	67.8	67.5	68.2	1.32829
138	846	C	16	6	89	91	153.4	174.1	150.154	64.1	66.6	67.8	67.7	67.8	70.1	71.8	72.2	72.6	72.5	2.18375
138	846	C	16	6	93	95	153.44	174.14	150.168	66.3	68.2	68.7	68.3	68	69.5	71.2	71.5	71.6	72.3	2.47268
138	846	C	16	6	97	99	153.48	174.18	150.182	66	67.9	68.1	67.6	67.1	68.1	69.7	69.9	69.6	70.3	2.43222
138	846	C	16	6	101	103	153.52	174.22	150.196	74.3	76.5	76.5	75.7	74.9	75.6	76.7	76.7	76.2	76.5	3.52484
138	846	C	16	6	105	107	153.56	174.26	150.21	75.5	77.2	77.6	77	76.3	77.3	78.5	78.6	78.5	78.7	3.68201
138	846	C	16	6	109	111	153.6	174.3	150.223	67.6	69.5	69.7	69	68.2	69.3	70.8	71	70.7	71.2	2.64023
138	846	C	16	6	113	115	153.64	174.34	150.237	67.1	69.4	69.4	68.7	67.8	68.5	69.8	70.2	69.7	69.4	2.57342
138	846	C	16	6	117	119	153.68	174.38	150.25	67.2	69.1	69.1	68.1	67.2	67.9	69.2	69.3	69.1	69.2	2.58567
138	846	C	16	6	121	123	153.72	174.42	150.28	66.5	68.2	68	67.2	66.3	67.2	68.7	68.7	68	67.9	2.49251
138	846	C	16	6	125	127	153.76	174.46	150.314	55.4	57.7	58.1	57.5	56.9	58.5	60.5	60.7	60.2	60.1	1.02912
138	846	C	16	6	129	131	153.8	174.5	150.347	45.9	48.6	49	48.6	48.4	50.5	52.6	53.1	53.2	53.6	-0.223459
138	846	C	16	6	133	135	153.84	174.54	150.381	42.5	45.3	45.8	45.5	45.6	47.6	50	50.7	50.2	50.5	-0.67235
138	846	C	16	6	137	139	153.88	174.58	150.415	44.8	47.8	48.9	48.8	49	51.8	54.4	55	54.9	54.8	-0.370249
138	846	C	16	6	141	143	153.92	174.62	150.448	41	43.2	43.7	43.3	43	45.2	47.7	48.1	48.2	48.6	-0.87184
138	846	C	16	6	145	147	153.96	174.66	150.482	41.8	44.7	45.6	45.4	45.3	47.7	50.2	50.7	50.6	51.2	-0.767369
138	846	C	16	7	1	3	154.02	174.72	150.533	36	39.5	40.7	40.6	40.5	43.2	45.8	46	46.2	46.5	-1.53293
138	846	C	16	7	5	7	154.06	174.76	150.565	35.3	38	39.3	39.5	39.6	42.5	45.6	46.3	45.9	46.1	-1.62609
138	846	C	16	7	9	11	154.1	174.8	150.598	31.9	34.6	35.8	36	36.3	39.7	42.9	43.5	43.4	43.9	-2.07498
138	846	C	16	7	13	15	154.14	174.84	150.63	30.5	33.3	34.3	34.5	34.8	37.9	40.8	41.4	41.5	42	-2.26036
138	846	C	16	7	17	19	154.18	174.88	150.662	32.3	35.4	36.6	36.8	37.1	40.2	43.1	43.6	43.6	44.2	-2.02414
138	846	C	16	7	21	23	154.22	174.92	150.694	32.7	35.6	36.6	36.6	36.7	39.8	42.6	43	42.8	43.2	-1.97237
138	846	C	16	7	25	27	154.26	174.96	150.726	34.7	37.3	37.8	37.4	37	39.4	42	42.3	42.2	42.7	-1.70979
138	846	C	16	7	29	31	154.3	175	150.758	33.4	35.8	36.4	36	35.7	38.2	40.9	41.3	41.2	41.8	-1.882
138	846	C	16	7	33	35	154.34	175.04	150.79	32.3	34.9	35.8	35.6	35.5	38.2	40.9	41.4	41.4	41.8	-2.02786
138	846	C	16	7	37	39	154.38	175.08	150.822	34.9	38	38.8	38.5	38.5	41.3	44	44.4	44.1	44.4	-1.68623
138	846	C	16	7	41	43	154.42	175.12	150.853	35.5	38.1	38.8	38.4	38.2	40.6	43.3	43.8	43.6	43.5	-1.60811
138	846	C	16	7	45	47	154.46	175.16	150.886	38.1	41	41.7	41.1	40.6	42.7	45.1	45.4	45.4	45.8	-1.26649
138	846	C	16	7	49	51	154.5	175.2	150.917	40.6	43.9	44.7	44.3	43.9	46.1	48.6	48.8	48.5	49.4	-0.938035
138	846	C	17	1	1	3	154.52	176.02	151.65	47.8	50	50.5	50.3	49.9	51.6	53.6	54.1	54.4	54.9	-0.00849189
138	846	C	17	1	5	7	154.56	176.06	151.682	54.5	57	57.4	56.9	56.3	57.6	59.4	59.6	59.4	59.5	0.873322
138	846	C	17	1	9	11	154.6	176.1	151.716	51.3	53.6	53.7	53	52.4	53.8	55.5	55.9	56	56.1	0.450782
138	846	C	17	1	13	15	154.64	176.14	151.748	57.2	58.9	59.1	58.4	57.7	58.7	60.4	60.8	60.7	60.7	1.22719
138	846	C	17	1	17	19	154.68	176.18	151.781	59.3	61.4	61.7	61.1	60.2	61.1	62.9	63.2	62.7	63	1.50294
138	846	C	17	1	21	23	154.72	176.22	151.815	59.4	61.1	61.1	60.6	60	61	62.6	63.1	63	63.3	1.51519
138	846	C	17	1	25	27	154.76	176.26	151.847	55.7	58	58.3	58.2	58	59.4	61.3	61.9	61.7	61.9	1.02677
138	846	C	17	1	29	31	154.8	176.3	151.88	53.1	55.7	56.1	55.7	55.3	56.5	58.4	59	58.6	58.8	0.683284
138	846	C	17	1	33	35	154.84	176.34	151.913	56.6	59.1	59.7	59.4	59	60.1	61.8	62.1	62	62.1	1.14349
138	846	C	17	1	37	39	154.88	176.38	151.947	51.5	53.3	53.4	53.1	52.5	53.8	55.8	56.3	56.1	56.7	0.470618
138	846	C	17	1	41	43	154.92	176.42	151.98	50.3	52.5	53.1	53	52.8	54.6	56.8	57.2	57.4	57.9	0.311584
138	846	C	17	1	45	47	154.96	176.46	152.014	52.7	54.8	55.1	54.2	53.1	53.9	55.6	55.8	56	55.5	0.626861
138	846	C	17	1	49	51	155	176.5	152.048	49.6	51.2	51.2	50.6	49.8	51	52.9	53.5	53.5	53.3	0.217496
138	846	C	17	1	53	55	155.04	176.54	152.081	51.5	53.9	54.2	53.4	52.4	53.5	55.4	55.8	55.4	55.4	0.466896
138	846	C	17	1	57	59	155.08	176.58	152.114	51.9	54.7	55.2	54.8	54.4	55.8	57.7	58.1	58	58.1	0.518666
138	846	C	17	1	61	63	155.12	176.62	152.148	51.1	54	54.2	53.3	52.5	53.5	55.4	55.6	55.3	55.2	0.412334
138	846	C	17	1	65	67	155.16	176.66	152.181	47	49.5	50.1	49.5	49	50.9	52.9	53.4	53.6	53.2	-0.128784
138	846	C	17	1	69	71	155.2	176.7	152.215	42.5	44.9	45.5	45.5	45.6	48	50.5	51.3	51.4	51.4	-0.722603
138	846	C	17	1	73	75	155.24	176.74	152.249	40.3	42.3	43.3	43.6	44.1	47.1	49.8	50.8	51.4	51.8	-1.01339
138	846	C	17	1	77	79	155.28	176.78	152.284	39.9	43	43.7	43.6	44	46.7	49.3	50.4	50.2	50.7	-1.06702
138	846	C	17	1	81	83	155.32	176.82	152.319	40.2	43.1	43.7	43.4	43.5	45.8	48.1	49.1	49.2	49	-1.02843
138	846	C	17	1	85	87	155.36	176.86	152.354	42.2	45.2	45.8	45.5	45.3	47.5	49.9	50.4	50.4	50.6	-0.765851
138	846	C	17	1	89	91	155.4	176.9	152.39	40.6	43.4	44.1	43.9	43.8	46.2	48.8	49.5	49.5	49.8	-0.977586
138	846	C	17	1	93	95	155.44	176.94	152.425	41.6	44.3	44.9	44.8	45	47.3	49.9	50.6	50.5	50.9	-0.846764
138	846	C	17	1	97	99	155.48	176.98	152.46	36.5	38.5	39.2	38.9	39	41.6	44.2	44.9	45.7	46.3	-1.51963
138	846	C	17	1	101	103	155.52	177.02	152.496	35.8	38.1	39	39	39.3	42.2	44.9	45.9	46.3	46.4	-1.61279
138	846	C	17	1	105	107	155.56	177.06	152.531	34.6	36.8	37.8	37.7	37.9	40.9	43.7	44.6	45.1	45.3	-1.77183
138	846	C	17	1	109	111	155.6	177.1	152.566	34.7	36.9	37.7	37.6	37.7	40.4	43.2	43.9	44	44.7	-1.75958
138	846	C	17	1	113	115	155.64	177.14	152.602	34.9	37.1	37.9	38	38.3	41.2	44.1	45	45.4	45.7	-1.73416
138	846	C	17	1	117	119	155.68	177.18	152.637	36.4	39	39.9	40.1	40.5	43.2	46.1	46.9	46.8	47.5	-1.53746
138	846	C	17	1	121	123	155.72	177.22	152.673	34.5	37.2	38.3	38.6	39.2	42.6	45.6	46.3	47.2	47.5	-1.78872
138	846	C	17	1	125	127	155.76	177.26	152.708	34.4	37.5	38.9	39.5	40.3	43.9	47.3	48.4	48.5	48.9	-1.80283
138	846	C	17	1	129	131	155.8	177.3	152.743	39.1	42.3	43.3	43.4	44	46.8	49.6	50.4	50.6	51.1	-1.18452
138	846	C	17	1	133	135	155.84	177.34	152.779	39	42.2	43.4	43.9	44.6	47.9	50.9	51.8	52.1	52.7	-1.19863
138	846	C	17	1	137	139	155.88	177.38	152.815	39.1	41.4	42.6	43	43.6	46.7	49.4	50.5	51	51.2	-1.18638
138	846	C	17	1	141	143	155.92	177.42	152.849	37.7	39.9	40.6	40.9	41.4	44.4	47.3	48.3	48.9	49.7	-1.37177
138	846	C	17	1	145	147	155.96	177.46	152.885	41.5	43.6	44.6	44.9	45.3	48.3	51.2	51.8	52.6	53.7	-0.872037
138	846	C	17	2	1	3	156.02	177.52	152.936	40.3	42.6	43.5	43.7	44.1	47.1	50	50.8	51.1	51.8	-1.03154
138	846	C	17	2	5	7	156.06	177.56	152.969	44.1	46.7	47.9	48.4	49	51.9	54.5	55	55	55.7	-0.531806
138	846	C	17	2	9	11	156.1	177.6	153.003	45.3	47.4	48.1	48.2	48.3	50.7	53.3	53.9	54.1	54.5	-0.374633
138	846	C	17	2	13	15	156.14	177.64	153.037	44.2	47.5	48.9	49.4	50.2	53.5	56.5	57.3	57.7	58.3	-0.520492
138	846	C	17	2	17	19	156.18	177.68	153.071	41.6	43.9	44.9	45.1	45.5	48.4	51.2	52	52.6	53.5	-0.86398
138	846	C	17	2	21	23	156.22	177.72	153.105	48.6	51.3	52.2	52.3	52.3	54.4	56.6	57.3	57.2	57.6	0.0573596
138	846	C	17	2	25	27	156.26	177.76	153.138	42.7	45.5	46.7	47.1	47.8	51.2	54.2	55.1	55.4	56.5	-0.720913
138	846	C	17	2	29	31	156.3	177.8	153.172	40	43.3	44.6	45	45.8	49.4	52.6	53.6	54	54.6	-1.07758
138	846	C	17	2	33	35	156.34	177.84	153.206	44.1	47.2	48.2	48.2	48.5	51.1	53.7	54.2	53.9	54.4	-0.53832
138	846	C	17	2	37	39	156.38	177.88	153.239	44.7	47.6	48.4	48.2	48.1	50.6	53.2	53.7	53.6	53.6	-0.460199
138	846	C	17	2	41	43	156.42	177.92	153.273	43.2	45.3	45.9	45.9	45.9	48.4	51	51.7	52.1	53.1	-0.658759
138	846	C	17	2	45	47	156.46	177.96	153.309	43.8	45.7	46.1	45.9	46	48.3	50.7	51.1	50.9	51.6	-0.580638
138	846	C	17	2	49	51	156.5	178	153.343	45.2	47.5	48.1	48	47.8	50	52.5	53.1	52.9	53.1	-0.397114
138	846	C	17	2	53	55	156.54	178.04	153.379	44.8	47.3	47.9	47.8	47.9	50.1	52.4	53.1	53.6	53.2	-0.450746
138	846	C	17	2	57	59	156.58	178.08	153.415	43.6	45.7	46.3	46.1	45.9	48	50.3	51	51.4	52	-0.60978
138	846	C	17	2	61	63	156.62	178.12	153.45	41.1	43.4	44.3	44.5	45	48.1	50.9	51.7	51.9	52.7	-0.940093
138	846	C	17	2	65	67	156.66	178.16	153.485	45.7	48	48.5	48.5	48.7	51	53.4	54.2	54.5	55.1	-0.33496
138	846	C	17	2	69	71	156.7	178.2	153.521	49.5	52.4	53.2	53	53	55.3	57.6	57.9	57.9	58.9	0.16477
138	846	C	17	2	73	75	156.74	178.24	153.556	49.3	51.6	52.5	52.5	52.7	55	57.3	57.8	58.2	58.6	0.137489
138	846	C	17	2	77	79	156.78	178.28	153.592	50.9	52.8	53.3	53.3	53.4	55.5	57.8	58.5	58.6	59.2	0.347363
138	846	C	17	2	81	83	156.82	178.32	153.627	52.8	54.7	55	54.9	54.9	56.9	59	59.7	59.7	60.1	0.596763
138	846	C	17	2	85	87	156.86	178.36	153.665	48.6	50.9	51.7	51.7	51.7	53.9	56.4	56.8	56.6	57.3	0.0424699
138	846	C	17	2	89	91	156.9	178.4	153.702	47.9	50.5	51.2	51.2	51.2	53.4	55.9	56.5	56.7	57.1	-0.0506877
138	846	C	17	2	93	95	156.94	178.44	153.738	46.6	49.3	50.1	50	50	52.3	54.6	55.1	55.1	55.7	-0.222897
138	846	C	17	2	97	99	156.98	178.48	153.776	49.2	51.6	52.2	51.9	51.6	53.5	55.7	56.2	56.2	56.6	0.11873
138	846	C	17	2	101	103	157.02	178.52	153.813	54.9	57.2	57.5	56.9	56.2	57.7	59.5	59.7	59.4	59.7	0.868791
138	846	C	17	2	105	107	157.06	178.56	153.85	55.7	57.4	57.5	57.1	56.7	58.4	60.4	60.7	60.7	60.9	0.973262
138	846	C	17	2	109	111	157.1	178.6	153.887	52.7	54.4	54.5	53.9	53.5	55.3	57.4	58	58.3	59	0.577073
138	846	C	17	2	113	115	157.14	178.64	153.922	52.1	53.2	53.1	52.5	51.9	53.5	55.4	55.9	56	56.5	0.497091
138	846	C	17	2	117	119	157.18	178.68	153.956	53	54.1	53.9	53.3	52.8	54.3	56.3	56.7	56.7	56.9	0.614738
138	846	C	17	2	121	123	157.22	178.72	153.987	50.2	51.2	51.3	50.9	50.6	52.2	54.3	54.9	55.3	56	0.244899
138	846	C	17	2	125	127	157.26	178.76	154.018	49.3	51.3	51.7	51.6	51.8	53.8	56.1	56.6	57	58	0.125391
138	846	C	17	2	129	131	157.3	178.8	154.049	52	53.1	53	52.7	52.5	54.1	56.1	56.7	56.9	56.9	0.480193
138	846	C	17	2	133	135	157.34	178.84	154.079	55.2	56.2	56.1	55.7	55	56	57.9	58.2	57.9	58.3	0.900872
138	846	C	17	2	137	139	157.38	178.88	154.109	53.7	54.3	54.5	54.1	53.5	55	57	57.3	57.3	58.3	0.702312
138	846	C	17	2	141	143	157.42	178.92	154.141	68.5	70.7	70.6	69.4	67.8	67.8	68.9	69.2	68.6	68.4	2.65132
138	846	C	17	2	145	147	157.46	178.96	154.171	60.6	61.8	61.4	60.6	59.8	60.7	62.2	62.4	62.1	62.6	1.60955
138	846	C	17	3	1	3	157.52	179.02	154.216	56	57.2	57.1	55.9	54.7	55.7	57.3	57.6	57.8	57.3	1.00209
138	846	C	17	3	5	7	157.56	179.06	154.246	56.3	57.8	57.7	56.6	55.7	56.8	58.3	58.7	58.7	58.2	1.04068
138	846	C	17	3	9	11	157.6	179.1	154.277	54.5	56.2	56.2	55.8	55.6	57.1	59	59.7	59.9	60.2	0.802596
138	846	C	17	3	13	15	157.64	179.14	154.307	52.9	53.7	53.6	53.1	52.4	53.9	56	56.5	56.4	57.3	0.590861
138	846	C	17	3	17	19	157.68	179.18	154.337	53.9	55	55.1	54.5	53.9	55.4	57.4	58.1	58.1	58.6	0.721683
138	846	C	17	3	21	23	157.72	179.22	154.368	57.2	58.9	58.6	57.7	57	58.1	59.7	60.3	60.1	60.1	1.15554
138	846	C	17	3	25	27	157.76	179.26	154.397	53.3	54.7	54.7	54	53.4	54.9	56.7	57.3	57.6	57.8	0.64077
138	846	C	17	3	29	31	157.8	179.3	154.427	49.1	50.5	50.6	50.3	50	51.9	54.1	54.9	55.1	55.6	0.0864771
138	846	C	17	3	33	35	157.84	179.34	154.457	46.1	47.9	48.2	47.7	47.1	48.6	50.7	51.3	51.8	52.3	-0.309712
138	846	C	17	3	37	39	157.88	179.38	154.487	49.4	51.5	51.4	50.5	49.5	50.8	52.7	53	52.8	53	0.124142
138	846	C	17	3	41	43	157.92	179.42	154.517	44.2	46.3	46.6	46.2	45.8	47.5	49.8	50.4	50.3	50.8	-0.561904
138	846	C	17	3	45	47	157.96	179.46	154.546	47.2	49.5	49.9	49.2	48.5	49.9	52	52.4	52.1	52.3	-0.167576
138	846	C	17	3	49	51	158	179.5	154.575	48.7	50.1	50.1	49.5	49	50.6	52.9	53.3	53.3	53.6	0.0291229
138	846	C	17	3	53	55	158.04	179.54	154.605	49.2	51.6	51.8	51.2	50.5	51.9	53.9	54.3	54.2	54.3	0.0940688
138	846	C	17	3	57	59	158.08	179.58	154.633	47.9	50.3	50.6	50.4	50.3	52.3	54.4	55.2	55.5	55.7	-0.0781406
138	846	C	17	3	61	63	158.12	179.62	154.661	52.5	54.8	55.3	55.3	55.1	56.9	59	59.7	59.5	59.9	0.526992
138	846	C	17	3	65	67	158.16	179.66	154.689	52.4	54.8	55.4	55.5	55.8	57.8	59.9	60.7	61.1	61.7	0.512886
138	846	C	17	3	69	71	158.2	179.7	154.716	51.6	54.9	56	56.3	57.1	59.8	62.2	63.1	63.3	63.6	0.406553
138	846	C	17	3	73	75	158.24	179.74	154.742	48.4	50.1	50.4	50.4	50.5	52.7	55	55.6	55.6	56.3	-0.0159866
138	846	C	17	3	77	79	158.28	179.78	154.769	55.1	58	58.8	58.9	59	60.8	62.8	63.2	63.2	63.6	0.865827
138	846	C	17	3	81	83	158.32	179.82	154.794	55.8	59.2	60	60.3	60.5	62.3	64.4	65	64.8	65.6	0.957124
138	846	C	17	3	85	87	158.36	179.86	154.82	49.4	52.4	53.5	53.9	54.7	57.4	59.9	60.8	61	61.7	0.112975
138	846	C	17	3	89	91	158.4	179.9	154.845	53.5	56.2	57.2	57.5	57.8	60.1	62.4	63	63.3	64	0.652231
138	846	C	17	3	93	95	158.44	179.94	154.869	56.3	58.3	58.8	58.7	58.3	59.6	61.4	61.9	61.7	62.3	1.02021
138	846	C	17	3	97	99	158.48	179.98	154.892	50.6	52.8	53.3	53.4	53.4	55.3	57.5	58.1	58.5	59	0.268286
138	846	C	17	3	101	103	158.52	180.02	154.916	52.1	53.9	54.5	54.8	54.9	56.8	59.1	59.6	60.3	60.7	0.464985
138	846	C	17	3	105	107	158.56	180.06	154.94	51.8	54.3	55.1	55.4	55.6	57.8	60.3	61	61.2	62.4	0.424528
138	846	C	17	3	109	111	158.6	180.1	154.964	58.6	60	60.3	60.1	59.6	60.7	62.5	63	62.8	63.5	1.31952
138	846	C	17	3	113	115	158.64	180.14	154.988	61.8	62.4	62.2	61.3	60.2	60.6	61.9	62.5	62	62.1	1.7402
138	846	C	17	3	117	119	158.68	180.18	155.011	56.3	56.8	56.5	55.4	53.9	54.3	56	56.3	56	56.6	1.01462
138	846	C	17	3	121	123	158.72	180.22	155.035	57.9	59.4	59.3	58.4	57.3	57.8	59.2	59.6	59.4	59.6	1.2245
138	846	C	17	3	125	127	158.76	180.26	155.059	64.3	65.7	65.5	64.2	62.5	62.6	64	64.2	63.7	63.2	2.06679
138	846	C	17	3	129	131	158.8	180.3	155.083	59.8	61.1	61	60.5	60	61	62.7	63.3	63	62.8	1.47297
138	846	C	17	3	133	135	158.84	180.34	155.107	63.9	65.6	65.8	65.3	64.7	65.7	67.4	67.6	67.5	67.8	2.01222
138	846	C	17	3	137	139	158.88	180.38	155.131	52.2	54.1	54.6	54.5	54.6	56.6	58.8	59.6	59.6	60.2	0.469785
138	846	C	17	3	141	143	158.92	180.42	155.155	47.1	48.6	49	48.8	48.7	50.8	53.1	53.7	54.2	54.7	-0.203086
138	846	C	17	3	145	147	158.96	180.46	155.179	48.5	50.3	50.9	50.7	50.6	52.6	54.7	55.5	55.6	55.7	-0.0195622
138	846	C	17	4	1	3	159.02	180.52	155.215	44.3	46.6	47.4	47.2	46.9	49.1	51.5	52.1	52.1	52.6	-0.57432
138	846	C	17	4	5	7	159.06	180.56	155.24	43.6	45.9	46.4	46.1	45.7	47.7	50.2	50.6	50.8	51.4	-0.667478
138	846	C	17	4	9	11	159.1	180.6	155.267	43.6	46.4	47.3	47.4	47.5	49.9	52.4	52.9	53	53.4	-0.668408
138	846	C	17	4	13	15	159.14	180.64	155.293	43	45.2	46	45.8	45.5	47.7	50	50.6	50.7	50.9	-0.748391
138	846	C	17	4	17	19	159.18	180.68	155.32	42.7	45.5	46.4	46.6	46.7	49	51.7	52.1	52.1	53	-0.788847
138	846	C	17	4	21	23	159.22	180.72	155.347	42.3	45.2	46.3	46.8	47.2	49.9	52.6	53.2	53.3	54.2	-0.842479
138	846	D	10	1	20	22	87.51	98.81	84.3462	40.8	43.5	44.2	43.8	43.2	45	47.1	47.1	46.2	45.3	0.889788
138	846	D	10	1	28	30	87.59	98.89	84.4118	35.2	37.7	38.3	38.1	37.7	40	42.2	42.5	41.8	41.9	0.247972
138	846	D	10	1	36	38	87.67	98.97	84.4774	37.4	40.3	41.3	41.3	41	43.3	45.8	45.8	45	44.6	0.496947
138	846	D	10	1	44	46	87.75	99.05	84.543	38.1	41.6	42.4	42.4	42.1	44.3	46.4	46.5	45.6	44.4	0.574467
138	846	D	10	1	52	54	87.83	99.13	84.6103	36	39.3	40.2	40.3	40.2	42.5	44.8	44.7	44	43.4	0.331936
138	846	D	10	1	60	62	87.91	99.21	84.679	35.5	39.1	40.2	40.3	40.2	42.9	45.4	45.4	44.9	43.5	0.272291
138	846	D	10	1	68	70	87.99	99.29	84.7477	37.5	41.1	42.3	42	41.8	44.2	46.4	46.6	45.5	44.6	0.498406
138	846	D	10	1	76	78	88.07	99.37	84.8165	33.9	37.4	38.3	38.3	38.1	40.9	43.3	43.8	42.9	42.7	0.0844195
138	846	D	10	1	84	86	88.15	99.45	84.8852	34.6	37.7	38.4	38.2	37.9	40.2	42.6	42.6	42	40.9	0.161939
138	846	D	10	1	92	94	88.23	99.53	84.954	35.1	37.8	38.4	37.9	37.3	39.3	41.5	41.5	40.6	40.1	0.216598
138	846	D	10	1	100	102	88.31	99.61	85.0262	33.2	36.1	36.8	36.3	35.8	37.9	40.2	40.3	39.8	38.8	-0.00307201
138	846	D	10	1	108	110	88.39	99.69	85.0984	33	36.1	36.8	36.5	36.1	38.2	40.7	40.6	39.8	39.1	-0.0284257
138	846	D	10	1	116	118	88.47	99.77	85.1705	36.4	39.2	39.9	39.4	38.8	40.6	42.8	42.7	42	41.2	0.357714
138	846	D	10	1	124	126	88.55	99.85	85.2427	30	33	34.1	34	34	36.6	39.2	39.4	38.8	37.9	-0.376323
138	846	D	10	1	132	134	88.63	99.93	85.3149	34.3	37.6	38.5	38	37.5	39.5	41.8	41.8	40.8	39.9	0.11269
138	846	D	10	1	140	142	88.71	100.01	85.387	33.7	36.3	37.3	37.2	37.2	39.7	42.2	42.5	41.9	41.1	0.0416149
138	846	D	10	2	1	3	88.82	100.12	85.4837	42	44.5	45.1	44.9	44.4	46.2	48.3	48.3	47.5	46.7	0.986907
138	846	D	10	2	9	11	88.9	100.2	85.5535	39.6	41.7	42.2	41.8	41.5	43.2	45.4	45.7	45	44.2	0.710086
138	846	D	10	2	17	19	88.98	100.28	85.6234	43.6	46.7	47.3	46.8	46.1	47.9	49.7	49.9	48.9	48	1.16481
138	846	D	10	2	25	27	89.06	100.36	85.6932	44.6	47.9	48.7	48.5	48	49.9	51.8	51.9	50.8	50.5	1.27662
138	846	D	10	2	33	35	89.14	100.44	85.763	33.4	36.2	37.2	37.4	37.7	40.7	43.4	44	43.6	43.5	-0.00607602
138	846	D	10	2	41	43	89.22	100.52	85.8329	39.8	43.7	44.9	45.1	45.1	47.5	49.8	49.9	49.3	48.2	0.722974
138	846	D	10	2	49	51	89.3	100.6	85.9027	35.5	39.3	40.6	41.1	41.5	44.5	47.2	47.5	46.8	46.4	0.228976
138	846	D	10	2	57	59	89.38	100.68	85.9726	34.1	37.6	39	39.4	39.6	42.6	45.2	45.6	45	44.7	0.0664576
138	846	D	10	2	65	67	89.46	100.76	86.0447	29.9	33	34.4	34.9	35.5	38.8	41.7	42.1	41.8	41.2	-0.416111
138	846	D	10	2	73	75	89.54	100.84	86.1173	29.4	32.5	33.9	34.3	34.5	37.6	40.4	40.8	40.4	39.6	-0.475756
138	846	D	10	2	81	83	89.62	100.92	86.1919	29.8	32.8	33.8	33.8	33.6	36.2	38.8	39	38.3	37.7	-0.432527
138	846	D	10	2	89	91	89.7	101	86.2665	22.2	24.9	26.5	27.4	28.6	33	36.5	37.4	37.5	37	-1.30373
138	846	D	10	2	97	99	89.78	101.08	86.341	20.8	23.9	25.8	26.9	28.5	34.1	38.3	39.7	40.1	40	-1.46625
138	846	D	10	2	105	107	89.86	101.16	86.4156	19.7	22.8	24.6	26	27.7	33.6	38	39.6	40	40.3	-1.59447
138	846	D	10	2	113	115	89.94	101.24	86.4902	22.7	25.8	27.5	28.8	30.4	35.4	39.2	40.4	40.6	40.5	-1.25406
138	846	D	10	2	121	123	90.02	101.32	86.5648	23.9	27.2	29.5	30.8	32.4	38.5	42.7	44.4	44.7	44.9	-1.11938
138	846	D	10	2	129	131	90.1	101.4	86.6393	25.8	29.3	31.4	32.5	33.7	39	42.7	43.8	43.9	43.8	-0.9047
138	846	D	10	2	137	139	90.18	101.48	86.7139	30.1	33.4	35.1	35.7	36.4	40.2	43.3	43.8	43.7	43.4	-0.415687
138	846	D	10	2	145	147	90.26	101.56	86.7885	38.8	42.7	44.3	44.8	45.2	48	50.5	50.7	50	49.3	0.576262
138	846	D	10	3	1	3	90.32	101.62	86.8444	39.7	44	45.6	46.2	46.9	49.7	52.3	52.4	51.7	51.4	0.677266
138	846	D	10	3	9	11	90.4	101.7	86.919	38.5	41.6	43	43.2	43.2	45.8	48.4	48.8	48	47.7	0.537608
138	846	D	10	3	17	19	90.48	101.78	86.9936	37.6	41	42.2	42.2	42.2	44.8	47.4	47.7	46.9	46.4	0.432242
138	846	D	10	3	25	27	90.56	101.86	87.0681	38.8	42.1	43	43.1	42.9	45.1	47.4	47.5	47.1	46.8	0.566913
138	846	D	10	3	33	35	90.64	101.94	87.1427	36.5	39.9	41.1	41.1	41.1	43.8	46.3	46.5	45.9	45.2	0.301522
138	846	D	10	3	41	43	90.72	102.02	87.2173	33.9	36.7	37.4	37.1	36.6	38.8	41.1	41.2	40.7	40.6	0.00183932
138	846	D	10	3	49	51	90.8	102.1	87.2914	34.8	37.9	38.2	37.5	36.8	38.5	40.8	40.8	39.8	38.6	0.10222
138	846	D	10	3	57	59	90.88	102.18	87.362	37.1	39.4	40.1	39.5	38.6	40.3	42.6	42.4	41.3	41.1	0.362625
138	846	D	11	2	41	43	98.72	111.12	95.4589	33.3	36.6	38	38.4	38.7	42.2	45.1	45.4	45.4	45.1	-0.35032
138	846	D	11	2	49	51	98.8	111.2	95.5231	36.9	40.4	41.8	42	42.2	45.2	48	48.3	47.8	47.9	0.05868
138	846	D	11	2	57	59	98.88	111.28	95.5872	39.2	42.8	44	44	43.9	46.8	49.3	49.6	49.5	48.8	0.319085
138	846	D	11	2	65	67	98.96	111.36	95.6514	44	46.5	47.6	47.4	47.2	49.4	51.8	52	51.7	50.9	0.86525
138	846	D	11	2	73	75	99.04	111.44	95.7155	43.9	46.8	47.7	47.3	46.8	49	51	50.9	50.9	50.2	0.851327
138	846	D	11	2	97	99	99.28	111.68	95.91	48	50.5	50.8	50.6	50.4	52.2	53.9	54.3	54.2	53.2	1.31249
138	846	D	11	2	105	107	99.36	111.76	95.9756	47.1	49.4	49.7	49	48.2	50	51.9	51.9	51.3	51	1.20713
138	846	D	11	2	113	115	99.44	111.84	96.0412	44.5	47.2	47.7	47.4	47.1	49.1	51.3	51.5	51	50.7	0.907444
138	846	D	12	1	38	40	106.69	120.19	103.826	45.9	48.6	49.5	49.3	49.1	51.2	53.6	54.1	54	54.1	0.807264
138	846	D	12	1	46	48	106.77	120.27	103.889	44.4	47.6	48.6	48.5	48.4	50.7	53.2	53.6	53.6	53.9	0.633315
138	846	D	12	1	54	56	106.85	120.35	103.953	41.3	44.3	45.4	45.5	45.6	48.2	50.8	51.4	51.4	51.8	0.276481
138	846	D	12	1	62	64	106.93	120.43	104.015	42.8	45.7	46.6	46.6	46.5	48.8	51.1	51.6	51.3	51.8	0.445443
138	846	D	12	1	70	72	107.01	120.51	104.077	41.3	44.2	45.5	45.7	46.1	48.9	51.6	52.3	52.1	52.9	0.271495
138	846	D	12	1	78	80	107.09	120.59	104.137	43.3	46.4	47.5	47.9	48	50.8	53.3	54	53.8	54.6	0.497609
138	846	D	12	1	86	88	107.17	120.67	104.196	40.3	42.9	44.2	44.3	44.6	47.6	50.2	50.9	51	51.8	0.152205
138	846	D	12	1	94	96	107.25	120.75	104.254	42	45.3	46.5	46.6	46.7	49.1	51.8	52.5	52.1	51.9	0.344028
138	846	D	12	1	102	104	107.33	120.83	104.31	41.4	44.4	45.4	45.4	45.4	48	50.6	51.2	51.1	51.3	0.272953
138	846	D	12	1	110	112	107.41	120.91	104.366	41.1	44.4	45.7	45.6	45.7	48.2	50.9	51.4	51.1	51.5	0.236169
138	846	D	12	1	118	120	107.49	120.99	104.423	39.3	42.4	43.5	43.5	43.5	46.2	48.8	49.3	49.3	49.8	0.0279295
138	846	D	12	1	126	128	107.57	121.07	104.482	39.9	42.9	44	44	43.8	46.3	48.9	49.5	49.3	49.5	0.0940187
138	846	D	12	1	134	136	107.65	121.15	104.542	38.5	41.2	42.1	41.8	41.6	43.9	46.4	46.8	46.6	46.9	-0.0684994
138	846	D	12	1	142	144	107.73	121.23	104.602	34.3	37.2	38.2	38.1	37.9	40.6	43.5	44.1	44	44.7	-0.551068
138	846	D	12	2	1	3	107.82	121.32	104.671	38	40.3	40.7	40	39.3	41.3	43.8	44.1	44.2	44.6	-0.130949
138	846	D	12	2	5	7	107.86	121.36	104.703	38.8	41.5	42	41.5	40.9	43	45.5	45.9	45.6	45.9	-0.0407524
138	846	D	12	2	9	11	107.9	121.4	104.734	41	43.3	43.6	42.8	42	43.9	46.4	46.7	46.4	47.1	0.209469
138	846	D	12	2	13	15	107.94	121.44	104.766	44.1	46.7	47.2	46.3	45.6	47.4	49.7	50	49.9	49.9	0.562564
138	846	D	12	2	17	19	107.98	121.48	104.798	45.4	47.9	48.4	47.8	47.2	49.1	51.4	51.8	51.6	51.8	0.709912
138	846	D	12	2	21	23	108.02	121.52	104.83	43.4	46.4	47	46.5	46.1	48.1	50.6	51	50.8	50.7	0.480059
138	846	D	12	2	25	27	108.06	121.56	104.863	41.6	44.2	45	44.9	44.7	47.5	50	50.7	50.6	50.9	0.273065
138	846	D	12	2	29	31	108.1	121.6	104.895	46	48.6	49.7	49.6	49.6	52.2	54.6	55.1	55.3	56	0.774755
138	846	D	12	2	33	35	108.14	121.64	104.928	43.2	45.7	46.4	46.1	45.8	48.1	50.4	51.2	50.7	51.2	0.453458
138	846	D	12	2	37	39	108.18	121.68	104.961	39.2	41.6	42.5	42.2	42.2	45	47.6	48.2	48.3	48.7	-0.00500285
138	846	D	12	2	41	43	108.22	121.72	104.995	46.8	49.3	50	49.4	48.8	50.7	53	53.2	52.7	53.6	0.862459
138	846	D	12	2	45	47	108.26	121.76	105.03	45.6	48.2	48.8	48.4	48	50	52.3	52.6	52.4	52.7	0.724048
138	846	D	12	2	49	51	108.3	121.8	105.064	42.4	45.6	46.4	46.4	46.6	49.1	51.8	52.2	52.1	52.8	0.357029
138	846	D	12	2	53	55	108.34	121.84	105.098	43.1	45.8	46.2	45.7	45.1	47	49.4	49.8	49.4	50	0.435795
138	846	D	12	2	57	59	108.38	121.88	105.133	39.8	42.7	43.6	43.4	43	45	47.6	48.1	48.1	48.3	0.0573469
138	846	D	12	2	61	63	108.42	121.92	105.167	41.7	44.7	45.5	45	44.5	46.6	49.1	49.6	49.3	49.5	0.273277
138	846	D	12	2	65	67	108.46	121.96	105.202	42	44.7	45.3	44.8	44.3	46.4	48.8	49.3	49	49.4	0.306322
138	846	D	12	2	69	71	108.5	122	105.236	37.7	39.8	40.2	39.7	39.3	41.5	44.1	44.5	44.7	45	-0.18643
138	846	D	12	2	73	75	108.54	122.04	105.27	41.6	44.5	45.1	44.5	43.8	45.9	48.4	48.9	49	49.8	0.258107
138	846	D	12	2	77	79	108.58	122.08	105.305	39.5	41.7	42	41.3	40.6	42.6	45	45.5	45.7	46.5	0.0168233
138	846	D	12	2	81	83	108.62	122.12	105.339	37.6	39.5	39.7	38.9	38.2	40.2	42.7	43.2	43.1	44	-0.2016
138	846	D	12	2	85	87	108.66	122.16	105.373	37.2	39.5	39.8	38.9	38.1	39.9	42.4	42.8	42.8	43.7	-0.248568
138	846	D	12	2	89	91	108.7	122.2	105.408	32.5	34.2	34.4	33.5	32.8	34.8	37.4	37.9	37.9	38.5	-0.787042
138	846	D	12	2	93	95	108.74	122.24	105.442	36.2	38.5	39	38.4	37.8	40	42.6	43.1	43.3	44	-0.365365
138	846	D	12	2	97	99	108.78	122.28	105.476	30.6	31.9	32	31.3	30.7	33	35.8	36.4	36.5	37.5	-1.00671
138	846	D	12	2	101	103	108.82	122.32	105.511	29.5	31	31.3	30.8	30.4	32.9	35.7	36.4	36.4	37.2	-1.13369
138	846	D	12	2	105	107	108.86	122.36	105.545	31	32.4	32.5	31.9	31.4	33.7	36.5	36.9	37.1	38.1	-0.963483
138	846	D	12	2	109	111	108.9	122.4	105.58	31.4	33.3	33.8	33.4	32.9	35.3	38.1	38.7	38.9	39.6	-0.919008
138	846	D	12	2	113	115	108.94	122.44	105.614	33.9	35.7	36	35.5	35	37.5	40.3	40.7	40.5	41.4	-0.634496
138	846	D	12	2	117	119	108.98	122.48	105.648	42	45.2	46.1	45.8	45.6	47.9	50.5	50.8	50.5	50.9	0.290118
138	846	D	12	2	121	123	109.02	122.52	105.683	43.6	47	48.2	48.2	48.1	50.7	53.3	53.8	53.5	54.4	0.471757
138	846	D	12	2	125	127	109.06	122.56	105.717	43.1	45.9	46.7	46.4	46	48.3	50.8	51.5	51.5	51.6	0.413359
138	846	D	12	2	133	135	109.14	122.64	105.787	45.9	49.1	50.2	50	50	52.2	54.9	55.1	55.1	55.2	0.730916
138	846	D	12	2	137	139	109.18	122.68	105.822	48.8	51.7	52.6	52.2	51.5	53.6	55.6	55.7	55.7	55.4	1.06115
138	846	D	12	2	141	143	109.22	122.72	105.857	48	50.4	51.1	50.7	49.9	51.8	54.1	54.4	53.8	54	0.968461
138	846	D	12	2	145	147	109.26	122.76	105.892	43.5	45.5	45.5	44.7	44.2	45.9	48.1	48.7	48.5	48.6	0.452848
138	846	D	13	1	109	111	116.9	131.5	113.234	36.8	39.1	40	40	40.3	43.1	46	47	47.3	48.8	-0.585346
138	846	D	13	1	113	115	116.94	131.54	113.266	34.5	36.9	38.1	38.5	39.2	42.8	46.2	47.3	48	49	-0.849491
138	846	D	13	1	117	119	116.98	131.58	113.298	36.7	40	41.4	41.9	42.6	45.9	49.1	50	50.3	51.1	-0.599269
138	846	D	13	1	121	123	117.02	131.62	113.33	28.7	31.3	32.9	33.8	35.2	40.2	44.3	46.1	47.3	48.7	-1.51494
138	846	D	13	1	125	127	117.06	131.66	113.362	29	31.5	32.8	33.4	34.3	38.1	41.8	43	43.6	44.9	-1.4819
138	846	D	13	1	129	131	117.1	131.7	113.394	24.7	26.5	27.4	27.9	28.7	32.4	36	37.3	38.1	39.6	-1.97465
138	846	D	13	1	133	135	117.14	131.74	113.427	26.7	29.2	30.7	31.4	32.5	36.6	40.5	41.9	42.5	43.5	-1.74729
138	846	D	13	1	137	139	117.18	131.78	113.459	19.7	20.9	21.9	22.5	23.4	27.6	31.6	33	34	35.4	-2.54866
138	846	D	13	1	141	143	117.22	131.82	113.492	20.1	21.2	22	22.5	23.2	27.2	31	32.4	33.4	34.8	-2.50419
138	846	D	13	1	145	147	117.26	131.86	113.524	19.5	20.7	21.5	22	22.8	26.8	30.6	32	32.8	34.4	-2.57402
138	846	D	13	2	1	3	117.32	131.92	113.574	24.1	26.5	28.1	29.1	30.4	35.5	39.9	41.6	42.5	43.8	-2.05009
138	846	D	13	2	5	7	117.36	131.96	113.606	20.1	21.5	22.6	23.3	24.3	28.8	32.8	34.5	35.5	36.9	-2.50855
138	846	D	13	2	9	11	117.4	132	113.639	19.1	20.6	21.7	22.5	23.6	28.6	32.9	34.5	35.8	37.3	-2.6241
138	846	D	13	2	13	15	117.44	132.04	113.672	19	20.6	21.7	22.4	23.4	28	32.1	33.7	34.5	36.1	-2.63678
138	846	D	13	2	17	19	117.48	132.08	113.705	18.4	19.7	20.7	21.5	22.7	27.5	31.8	33.5	34.5	36	-2.70661
138	846	D	13	2	21	23	117.52	132.12	113.738	18.4	19.9	20.9	21.7	22.9	27.6	31.9	33.5	34.2	35.8	-2.70785
138	846	D	13	2	25	27	117.56	132.16	113.77	18.8	20.2	21.1	21.8	22.9	27.4	31.5	33	33.9	35.5	-2.66338
138	846	D	13	2	29	31	117.6	132.2	113.803	19.7	21.2	22.1	22.9	23.8	28	32	33.3	34	35.4	-2.56175
138	846	D	13	2	33	35	117.64	132.24	113.836	20.9	22.8	24	24.7	25.8	30.3	34.4	35.8	36.7	38.3	-2.42583
138	846	D	13	2	37	39	117.68	132.28	113.869	20.8	22.3	23.6	24.5	25.8	30.6	34.9	36.3	37.3	38.7	-2.43851
138	846	D	13	2	41	43	117.72	132.32	113.902	20.6	22.2	23.4	24.1	25.2	29.7	33.8	35.2	36.1	38	-2.46262
138	846	D	13	2	45	47	117.76	132.36	113.934	21.7	23.4	24.6	25.4	26.5	30.8	34.6	36	36.9	38.4	-2.33813
138	846	D	13	2	49	51	117.8	132.4	113.967	23.3	25.3	26.5	27.2	28.3	32.5	36.3	37.6	38.5	40	-2.15649
138	846	D	13	2	53	55	117.84	132.44	114	21.5	23.5	24.9	25.7	26.9	31.9	36.1	37.8	38.9	40.3	-2.36348
138	846	D	13	2	57	59	117.88	132.48	114.033	24.4	27.1	28.6	29.7	31.2	36	40.2	41.5	42.5	43.6	-2.03325
138	846	D	13	2	61	63	117.92	132.52	114.066	21.8	23.8	25	25.6	26.8	31.5	35.5	36.9	37.8	39.1	-2.33169
138	846	D	13	2	65	67	117.96	132.56	114.098	25.8	28.5	30.1	30.9	32.2	36.4	40.3	41.6	42.2	43.5	-1.87572
138	846	D	13	2	69	71	118	132.6	114.131	27.9	30.9	32.5	33.4	34.7	38.9	42.8	44	44.5	45.6	-1.63693
138	846	D	13	2	73	75	118.04	132.64	114.164	25	27.3	28.6	29.4	30.5	34.6	38.4	39.6	40.2	41.6	-1.96965
138	846	D	13	2	77	79	118.08	132.68	114.197	26.4	29.4	31.1	32.1	33.5	38.1	42.1	43.6	44.2	45.6	-1.81088
138	846	D	13	2	81	83	118.12	132.72	114.23	25.4	28.1	29.8	30.9	32.4	37.4	41.8	43.4	44.4	46	-1.92643
138	846	D	13	2	85	87	118.16	132.76	114.262	24.1	26.4	27.8	28.7	30	34.3	38.3	39.9	40.7	42.2	-2.07627
138	846	D	13	2	89	91	118.2	132.8	114.296	22.2	24	25	25.7	26.6	30.6	34.5	35.8	36.7	38.1	-2.29469
138	846	D	13	2	93	95	118.24	132.84	114.33	24	26.3	27.6	28.4	29.5	33.9	37.7	39.2	39.8	41.5	-2.09019
138	846	D	13	2	97	99	118.28	132.88	114.364	25.1	27.5	28.8	29.6	30.8	35.1	39.1	40.5	41.2	42.3	-1.9657
138	846	D	13	2	101	103	118.32	132.92	114.399	28.8	31.6	33.1	33.8	34.9	39.2	43.2	44.5	45.1	46.4	-1.54403
138	846	D	13	2	105	107	118.36	132.96	114.433	28.8	31.1	32.3	32.7	33.5	37.3	40.8	42.1	42.6	43.8	-1.54527
138	846	D	13	2	109	111	118.4	133	114.468	28.5	30.7	31.9	32.5	33.3	37.3	40.9	42.2	42.8	43.9	-1.58081
138	846	D	13	2	113	115	118.44	133.04	114.502	26.5	28.8	30	30.5	31.3	35.5	39.4	40.9	41.8	43	-1.81066
138	846	D	13	2	117	119	118.48	133.08	114.536	29.3	31.5	32.6	33	33.5	36.9	40.3	41.5	42.2	43.5	-1.49186
138	846	D	13	2	121	123	118.52	133.12	114.571	29.7	32.2	33.4	34	34.7	38.6	42.3	43.5	44.2	45.6	-1.44738
138	846	D	13	2	125	127	118.56	133.16	114.605	31.7	34.1	35.2	35.6	36.1	39.6	43	44.1	44.9	46.1	-1.22002
138	846	D	13	2	129	131	118.6	133.2	114.639	40.7	43.4	44.5	44.8	45.1	48.1	51.1	52	52.5	53.5	-0.192538
138	846	D	13	2	133	135	118.64	133.24	114.674	43.3	46.3	47.6	48	48.4	51.8	54.9	56	56.5	57.4	0.103406
138	846	D	13	2	137	139	118.68	133.28	114.71	49.5	52.2	53.2	53.2	53	55.5	58	58.8	59.1	60.1	0.810842
138	846	D	13	2	141	143	118.72	133.32	114.746	47.4	50.3	51.2	50.9	50.7	52.8	55.3	55.9	55.9	56.6	0.569558
138	846	D	13	2	145	147	118.76	133.36	114.783	42.2	44.6	45.2	44.8	44.3	46.4	49	49.8	49.9	50.9	-0.026068
138	846	D	13	3	1	3	118.82	133.42	114.837	48.5	51.7	52.2	51.4	50.5	51.9	54.2	54.6	54.4	55.1	0.692175
138	846	D	13	3	5	7	118.86	133.46	114.873	31.8	34	34.8	34.9	35.2	38.9	42.4	43.5	44.1	45.4	-1.21794
138	846	D	13	3	9	11	118.9	133.5	114.909	45.1	47.9	48.6	48.4	48	50.1	52.6	53.2	53.2	53.8	0.30105
138	846	D	13	3	13	15	118.94	133.54	114.945	49.5	52.4	53.1	52.6	52.2	53.9	56.3	56.8	56.8	57.2	0.80274
138	846	D	13	3	17	19	118.98	133.58	114.981	48.4	50.8	51.4	51	50.6	52.4	54.7	55.3	55.7	56.4	0.675759
138	846	D	14	1	5	7	125.36	142.16	122.813	68.2	69.6	69.3	67.9	66.4	66.8	68.4	68.9	68.8	69.5	2.6716
138	846	D	14	1	9	11	125.4	142.2	122.844	63.5	64.3	64	63	61.8	62.6	64.5	65.1	65.4	65.9	2.13312
138	846	D	14	1	13	15	125.44	142.24	122.875	43.4	45.1	45.1	44.2	43.4	45.1	47.6	48.3	48.6	49.4	-0.165625
138	846	D	14	1	17	19	125.48	142.28	122.906	47.4	49.3	49.2	47.9	46.7	48	50.3	51	51	51.8	0.290343
138	846	D	14	1	21	23	125.52	142.32	122.937	53.7	55.9	56.2	55.6	54.7	56.5	58.7	59.2	59.4	60.2	1.00921
138	846	D	14	1	25	27	125.56	142.36	122.967	52.7	54.8	55.1	54.3	53.6	55.3	57.5	58.2	58.2	59	0.893659
138	846	D	14	1	29	31	125.6	142.4	122.998	53.5	56.1	57	56.6	56.6	59.3	62	62.9	63	64.1	0.983856
138	846	D	14	1	33	35	125.64	142.44	123.028	56.7	58.9	59.1	58.3	57.5	59.1	61.2	61.8	61.7	62.8	1.34838
138	846	D	14	1	37	39	125.68	142.48	123.057	58.8	61.3	61.5	60.6	59.7	60.9	63	63.4	63.3	64.2	1.58717
138	846	D	14	1	41	43	125.72	142.52	123.086	61	63.7	63.9	62.9	61.8	62.8	64.8	65.1	65	65.5	1.83739
138	846	D	14	1	45	47	125.76	142.56	123.114	55.3	56.4	56.5	55.8	55.3	56.8	59.1	59.8	60.3	61	1.18462
138	846	D	14	1	49	51	125.8	142.6	123.142	59.2	60.9	61.1	60.3	59.4	60.7	62.7	63.4	63.4	63.9	1.62915
138	846	D	14	1	53	55	125.84	142.64	123.17	63.4	65.1	65.2	64.1	62.8	63.6	65.3	66	65.7	66.2	2.10798
138	846	D	14	1	57	59	125.88	142.68	123.197	51.2	52	51.6	50.7	49.8	51.1	53.3	54.1	54.4	55.4	0.712232
138	846	D	14	1	61	63	125.92	142.72	123.224	51.4	51.8	51.4	50.4	49.6	50.9	53.2	54	54.5	55.5	0.733846
138	846	D	14	1	65	67	125.96	142.76	123.251	64.2	64.8	64.3	63.3	62.1	62.9	64.7	65.4	65.8	66.7	2.19569
138	846	D	14	1	69	71	126	142.8	123.276	71.9	73.1	72.7	71.5	70.1	70.4	71.9	72.3	72.4	73	3.07458
138	846	D	14	1	73	75	126.04	142.84	123.301	75.3	76.9	76.7	75.7	74.3	74.4	75.8	76.2	75.9	76.7	3.46196
138	846	D	14	1	77	79	126.08	142.88	123.327	77.9	79.9	79.8	78.7	77.2	77.2	78.5	78.8	78.6	79.2	3.75791
138	846	D	14	1	81	83	126.12	142.92	123.352	65.7	67.1	67	66.1	65.2	66.1	67.8	68.6	68.4	69.4	2.36216
138	846	D	14	1	85	87	126.16	142.96	123.377	66.6	67.6	67.2	66	64.8	65.4	67	67.6	67.8	68.5	2.46378
138	846	D	14	1	89	91	126.2	143	123.406	66.1	67.1	66.7	65.7	64.5	65.1	67	67.5	67.6	68.6	2.40538
138	846	D	14	1	93	95	126.24	143.04	123.435	62.5	64.3	64.1	63	61.6	62.4	64.3	64.8	64.7	65.4	1.99264
138	846	D	14	1	97	99	126.28	143.08	123.466	61.6	63.1	62.6	61	59	59.3	61.1	61.3	61.4	61.9	1.88853
138	846	D	14	1	101	103	126.32	143.12	123.498	58.2	60.3	60	58.6	56.8	57.4	59.3	59.7	59.6	60	1.49865
138	846	D	14	1	105	107	126.36	143.16	123.53	54.2	56	55.8	54.4	52.9	53.7	55.7	56.2	56.1	56.7	1.04019
138	846	D	14	1	109	111	126.4	143.2	123.562	54	55.5	55.1	53.6	51.9	52.7	54.7	55	54.8	55.7	1.01608
138	846	D	14	1	113	115	126.44	143.24	123.594	52.6	54.7	54.7	53.5	52.2	53.5	55.5	55.8	55.8	56.4	0.854806
138	846	D	14	1	117	119	126.48	143.28	123.628	52.4	54.1	54.2	53.4	52.6	54	56.4	56.9	57.1	58.2	0.830699
138	846	D	14	1	121	123	126.52	143.32	123.662	50.6	52.1	52.4	51.7	51.1	53	55.5	56.2	56.7	57.4	0.623706
138	846	D	14	1	125	127	126.56	143.36	123.696	50.6	53.2	53.4	52.6	51.6	53.2	55.5	55.9	56	56.3	0.622459
138	846	D	14	1	129	131	126.6	143.4	123.731	44.2	46.8	47.6	47.2	46.9	49.9	52.8	53.7	54.1	54.8	-0.110331
138	846	D	14	1	133	135	126.64	143.44	123.765	50.8	53.1	53.3	52.5	51.7	53.3	55.8	56.1	56	57.2	0.642827
138	846	D	14	1	137	139	126.68	143.48	123.799	63.1	64.9	65.1	64.2	63.4	64.5	66.4	66.9	66.9	67.4	2.04752
138	846	D	14	1	141	143	126.72	143.52	123.834	57.6	59.5	59.5	58.7	57.9	59.4	61.6	62.2	62.2	63.1	1.4176
138	846	D	14	1	145	147	126.76	143.56	123.868	62.1	63.8	63.8	62.9	61.9	63.1	65.2	65.8	65.9	66.8	1.93072
138	846	D	14	2	1	3	126.82	143.62	123.92	58.3	60.8	61.1	60.2	59.3	60.8	63	63.5	63.5	64.4	1.4945
138	846	D	14	2	5	7	126.86	143.66	123.954	58.6	59.8	59.5	58.4	57.3	58.4	60.4	61.1	61.4	62.4	1.52754
138	846	D	14	2	9	11	126.9	143.7	123.988	62.1	64.2	64.1	62.9	61.9	62.9	64.8	65.4	65.6	66	1.92636
138	846	D	14	2	13	15	126.94	143.74	124.021	63.2	65	64.8	63.4	61.7	62.1	63.8	64.3	64.2	64.8	2.05084
138	846	D	14	2	17	19	126.98	143.78	124.054	59.9	61.3	61.4	60.5	59.4	60.6	62.6	63.2	63.6	65	1.6724
138	846	D	14	2	21	23	127.02	143.82	124.086	64.1	65.9	65.7	64.4	62.8	63.2	64.9	65.5	65.2	65.6	2.15122
138	846	D	14	2	25	27	127.06	143.86	124.119	64.2	65.2	64.6	63.1	61.4	61.7	63.3	63.9	63.8	64.2	2.16141
138	846	D	14	2	29	31	127.1	143.9	124.152	63.1	64.7	64.4	63.1	61.6	62	63.7	64.3	64.2	64.5	2.03443
138	846	D	14	2	33	35	127.14	143.94	124.185	65	66.2	65.8	64.7	63.5	64.1	65.8	66.4	66.5	67.3	2.25036
138	846	D	14	2	37	39	127.18	143.98	124.218	70	71.8	71.6	70.1	68.4	68.5	70.1	70.5	70.2	71	2.82063
138	846	D	14	2	41	43	127.22	144.02	124.251	68.6	70.2	69.7	68	66	65.9	67.5	67.9	67.7	68.3	2.65936
138	846	D	14	2	45	47	127.26	144.06	124.283	67.2	68	67.2	65.5	63.6	63.7	65.3	65.8	65.9	66.8	2.49809
138	846	D	14	2	49	51	127.3	144.1	124.316	64.6	66.4	66.4	65.2	63.7	64.5	66.3	66.9	66.9	67.7	2.19965
138	846	D	14	2	53	55	127.34	144.14	124.349	57.8	58.8	58.1	56.4	54.4	54.9	56.8	57.3	57.2	58	1.42114
138	846	D	14	2	57	59	127.38	144.18	124.383	49.4	50	49.3	47.9	46.4	47.3	49.7	50.2	50.4	51.2	0.459742
138	846	D	14	2	61	63	127.42	144.22	124.417	50.7	52.2	51.6	49.7	47.7	48.5	50.6	51.1	51	51.7	0.60709
138	846	D	14	2	65	67	127.46	144.26	124.452	53.8	55	54.5	52.8	50.8	51.7	53.7	54.2	54.3	55	0.960185
138	846	D	14	2	69	71	127.5	144.3	124.486	55.3	56.7	56.1	54.4	52.5	53.2	55.2	55.7	55.7	56.5	1.13039
138	846	D	14	2	73	75	127.54	144.34	124.52	53.4	54.3	53.9	52.6	51.3	52.3	54.5	55.1	55.3	56.2	0.911971
138	846	D	14	2	77	79	127.58	144.38	124.555	57.4	59.6	59.6	58.5	57.4	58.7	60.8	61.3	61.4	62.1	1.36794
138	846	D	14	2	81	83	127.62	144.42	124.589	51.1	53.3	53.9	53.4	53.1	55.5	58.1	59	59.4	60.5	0.646579
138	846	D	14	2	85	87	127.66	144.46	124.623	52.3	54.4	54.7	54	53.4	55.2	57.6	58.3	58.5	59.6	0.782497
138	846	D	14	2	89	91	127.7	144.5	124.658	52.6	55.3	55.8	55.4	55.1	57.5	60	60.8	61.1	61.9	0.815542
138	846	D	14	2	93	95	127.74	144.54	124.692	54.4	56.6	57	56.4	55.8	57.7	60	60.8	60.8	62	1.02004
138	846	D	14	2	97	99	127.78	144.58	124.727	53.1	55.4	55.5	54.7	53.9	55.6	57.9	58.4	58.5	59.4	0.870201
138	846	D	14	2	101	103	127.82	144.62	124.763	48.4	50.8	51.1	50.3	49.5	51.4	53.8	54.3	54.4	55.1	0.331727
138	846	D	14	2	105	107	127.86	144.66	124.802	44.8	47.4	48	47.3	46.7	48.8	51.5	52	52	52.9	-0.0810129
138	846	D	14	2	109	111	127.9	144.7	124.842	42.4	45	45.4	44.8	44.2	46.6	49.4	50	50.1	51.2	-0.356588
138	846	D	14	2	113	115	127.94	144.74	124.882	44.6	46.4	46.3	45.2	44.2	45.9	48.3	48.9	48.8	49.9	-0.106367
138	846	D	15	1	1	3	134.82	152.82	132.788	50.3	51.2	51	50.1	49	50.2	52.5	53.3	53.6	54.2	0.293373
138	846	D	15	1	7	9	134.88	152.88	132.83	52.7	53.8	53.5	52.5	51.1	52.1	54.3	55	55.1	55.8	0.565832
138	846	D	15	1	13	15	134.94	152.94	132.868	62.4	64.7	64.2	62.1	59.6	59.5	61	61.5	61.2	61.5	1.67271
138	846	D	15	1	19	21	135	153	132.906	53.2	54.6	54.3	53	51.5	52.4	54.5	55.2	55.4	55.9	0.619244
138	846	D	15	1	25	27	135.06	153.06	132.944	54.9	55.7	55.2	54.2	52.9	53.9	56	56.6	56.6	57.1	0.81169
138	846	D	15	1	31	33	135.12	153.12	132.982	45.9	47.1	47.3	46.5	45.7	47.3	49.7	50.5	50.9	52.1	-0.218912
138	846	D	15	1	37	39	135.18	153.18	133.02	46	47.9	47.9	46.9	45.7	47.1	49.5	50.1	50.1	51	-0.209352
138	846	D	15	1	43	45	135.24	153.24	133.057	44	45.4	45.1	43.6	42	43.2	45.6	46.1	46.1	47.1	-0.439829
138	846	D	15	1	49	51	135.3	153.3	133.095	50.6	53	53.5	52.8	52	53.8	56.2	57	56.9	57.6	0.312706
138	846	D	15	1	55	57	135.36	153.36	133.133	34.6	35.7	35	33.1	31.4	32.7	35.3	35.9	36.3	37.3	-1.51802
138	846	D	15	1	61	63	135.42	153.42	133.171	36.1	37.7	37.5	36.3	35	36.7	39.4	40.1	40.4	41.3	-1.34844
138	846	D	15	1	67	69	135.48	153.48	133.209	45.4	46.7	46.4	45	43.4	44.5	46.8	47.5	47.5	48.2	-0.287283
138	846	D	15	1	73	75	135.54	153.54	133.247	48.3	49.6	49.3	48.1	46.7	47.7	49.9	50.5	50.8	51.9	0.0423284
138	846	D	15	1	79	81	135.6	153.6	133.285	47.4	49.4	49.4	48.1	46.6	47.7	50	50.6	50.7	51.5	-0.0624147
138	846	D	15	1	85	87	135.66	153.66	133.323	42.3	43.9	43.9	43.1	42.2	44	46.6	47.4	47.6	48.5	-0.647233
138	846	D	15	1	91	93	135.72	153.72	133.361	44.1	45.7	45.5	44.4	43.3	44.7	47.1	47.8	47.9	48.8	-0.443356
138	846	D	15	1	97	99	135.78	153.78	133.398	46.5	47.4	47	45.9	44.5	45.7	47.9	48.6	48.6	49.6	-0.170897
138	846	D	15	1	103	105	135.84	153.84	133.436	51.3	52.5	52.2	50.8	49.2	49.9	51.9	52.5	52.5	53	0.375891
138	846	D	15	1	109	111	135.9	153.9	133.474	49.4	50.3	49.8	48.4	46.7	47.4	49.5	50	50.1	51.1	0.156844
138	846	D	15	1	115	117	135.96	153.96	133.512	38.7	39.2	38.7	37.7	36.6	38.1	40.8	41.5	42	43.1	-1.06808
138	846	D	15	1	121	123	136.02	154.02	133.55	38	39.9	40.4	39.9	39.4	41.7	44.6	45.5	45.7	46.6	-1.14996
138	846	D	15	1	127	129	136.08	154.08	133.588	38.4	39	38.6	37.8	37	38.8	41.4	42.2	42.6	43.9	-1.10611
138	846	D	15	1	133	135	136.14	154.14	133.626	41.9	43.1	42.9	41.8	40.7	42.2	44.8	45.6	45.6	46.5	-0.707913
138	846	D	15	1	139	141	136.2	154.2	133.664	39.1	39.5	39.2	38.3	37.7	39.5	42.2	43	43.6	44.9	-1.02983
138	846	D	15	1	145	147	136.26	154.26	133.702	38.6	39.8	39.8	38.9	38	39.8	42.5	43.4	43.6	44.4	-1.08885
138	846	D	15	2	1	3	136.32	154.32	133.739	39.6	40.9	40.9	39.8	38.8	40.5	43.2	44	44.4	45.4	-0.97642
138	846	D	15	2	7	9	136.38	154.38	133.777	42.3	43.4	43	41.6	40	41.2	43.6	44.2	44.4	45.1	-0.66967
138	846	D	16	1	1	3	144.32	164.32	141.687	68.2	70.7	70.5	68.9	67.1	67.2	68.6	68.9	68.4	68.7	1.98104
138	846	D	16	1	7	9	144.38	164.38	141.744	65.3	67.6	67.8	66.9	65.9	66.7	68.4	68.7	68.6	68.9	1.64769
138	846	D	16	1	13	15	144.44	164.44	141.801	47.8	48.6	47.9	46.6	45.2	46.4	48.7	49.4	49.5	50.5	-0.354493
138	846	D	16	1	19	21	144.5	164.5	141.858	56	58.4	58.7	58	57.1	58.3	60.4	60.8	60.4	60.8	0.580927
138	846	D	16	1	25	27	144.56	164.56	141.915	56.4	59	59.5	59.1	58.6	60.3	62.4	62.9	62.8	63.4	0.624779
[truncated: 37 more rows]
