# Supplementary material for: A Revised Mid-Pliocene Composite Section for ODP Site 846
Source: Copernicus journal article supplement (doi:10.5194/cp-2019-133), 2020-02-21
Supplement: Supplementary file 8 [file Table S7 846D reflectance composite.xls]

## Sheet: Sheet1
TABLE S7: 846D REFLECTANCE COMPOSITE
Leg	Site	Hole	core	section	cm top	cm base	mbsf	mcd	log depth	Channel 1	Channel 2	Channel 3	Channel 4	Channel 5	Channel 6	Channel 7	Channel 8	Channel 9	Channel 10	Channel 1 detrended &normalized
138	846	D	9	4	113	115	83.44	93.84	79.9809	22	25.2	27.1	28.3	29.9	35.4	39.4	40.6	40.8	40.4	-1.10347
138	846	D	9	4	121	123	83.52	93.92	80.0552	23.7	27.1	28.7	29.6	30.9	35.8	39.4	40.4	40.3	39.8	-0.911643
138	846	D	9	4	129	131	83.6	94	80.1295	26.1	29.5	31	31.8	32.5	36.5	39.6	40.2	40.1	39.7	-0.639807
138	846	D	9	4	137	139	83.68	94.08	80.2043	26.2	29.5	31.1	31.9	33	37.4	40.5	41.3	41.6	41.4	-0.63087
138	846	D	9	4	145	147	83.76	94.16	80.2794	26.8	30.3	31.7	32.3	33	36.7	39.6	40.1	39.5	38.8	-0.564781
138	846	D	9	5	1	3	83.82	94.22	80.3357	26	29.2	30.6	31.4	32.2	35.7	38.8	39.2	38.6	38	-0.658093
138	846	D	9	5	9	11	83.9	94.3	80.4084	28.3	31.1	32.2	32.3	32.3	35	37.6	37.8	37.3	37.1	-0.397688
138	846	D	9	5	17	19	83.98	94.38	80.4755	33.2	36.1	36.8	36.5	36.3	38.5	40.7	40.7	40.2	39.6	0.159907
138	846	D	9	5	25	27	84.06	94.46	80.5395	38.5	41.5	42.1	41.5	40.8	42.4	44.6	44.6	43.8	42.9	0.763223
138	846	D	9	5	33	35	84.14	94.54	80.6034	36.4	39.3	39.9	39.2	38.6	40.4	42.4	42.2	41.6	41.5	0.520693
138	846	D	9	5	41	43	84.22	94.62	80.6674	34.4	37.5	38.2	37.9	37.3	39.4	41.8	41.7	41.1	40.6	0.289592
138	846	D	9	5	49	51	84.3	94.7	80.7314	37.1	40.6	41.5	40.8	40.3	42.2	44.1	44.5	43.6	41.8	0.595719
138	846	D	9	5	57	59	84.38	94.78	80.7954	36.3	39.6	40.2	40	39.5	41.6	43.9	43.9	43.5	42.7	0.501783
138	846	D	9	5	65	67	84.46	94.86	80.8593	36.8	40	40.5	40.4	40.1	42.2	44.8	44.8	44.7	44.3	0.556442
138	846	D	9	5	73	75	84.54	94.94	80.9233	39.7	42.1	43.1	42.9	42.4	44.6	46.8	46.9	46.7	46.1	0.88543
138	846	D	9	5	81	83	84.62	95.02	80.9873	33.7	36	36.6	36.6	36.3	38.6	41.1	41.6	40.7	40.3	0.197115
138	846	D	9	5	89	91	84.7	95.1	81.0513	37	40.1	40.9	40.9	40.6	42.7	45.1	45.2	44.6	44.2	0.571824
138	846	D	9	5	97	99	84.78	95.18	81.1152	32.2	35.9	37.1	37.1	37.1	39.6	41.9	42.4	42	40.3	0.0206735
138	846	D	9	5	105	107	84.86	95.26	81.1792	21.4	24	25.3	25.8	26.7	30.8	34.3	35.3	35.5	35.4	-1.2163
138	846	D	9	5	113	115	84.94	95.34	81.2432	20.2	22.7	24.3	25.4	26.7	31.5	35.3	36.5	36.5	36	-1.35596
138	846	D	9	5	121	123	85.02	95.42	81.3072	20.4	22.9	24.6	25.7	27.1	32.2	36.2	37.5	37.5	37.1	-1.33559
138	846	D	9	5	129	131	85.1	95.5	81.3747	21.4	24.6	26.6	27.7	29.1	34.1	37.8	38.8	39.2	39.1	-1.22378
138	846	D	9	5	137	139	85.18	95.58	81.4435	22	24.9	26.4	27.1	28.1	32.3	35.6	36.4	36.2	35.6	-1.15769
138	846	D	9	5	145	147	85.26	95.66	81.5128	21.6	25	26.5	27.3	28.2	32.9	36.7	37.2	37.3	37.1	-1.2059
138	846	D	9	6	1	3	85.32	95.72	81.5648	25	28.3	29.6	29.8	30.2	33.4	36.4	36.9	35.7	35.8	-0.819141
138	846	D	9	6	9	11	85.4	95.8	81.6329	26.6	29.9	30.8	30.8	30.8	33.6	36.2	36.5	35.9	35.1	-0.638748
138	846	D	9	6	17	19	85.48	95.88	81.6983	31.9	34.3	35.2	34.9	34.5	36.8	39	39.3	38.5	37.9	-0.0354312
138	846	D	9	6	25	27	85.56	95.96	81.7623	37.5	40	40.8	40.4	39.6	41.4	43.5	43.4	43	41.7	0.602176
138	846	D	9	6	33	35	85.64	96.04	81.8262	34.1	36.8	37.7	37.4	36.7	38.9	41.3	41.5	40.6	39.8	0.211051
138	846	D	9	6	41	43	85.72	96.12	81.8902	36.7	40.2	41.1	40.6	39.9	41.7	43.8	43.7	43.1	42.9	0.505747
138	846	D	9	6	49	51	85.8	96.2	81.9538	34.3	37.4	38.4	38.2	37.7	39.9	42.5	42.6	41.6	41.3	0.228926
138	846	D	9	6	57	59	85.88	96.28	82.017	32.2	35	35.5	35.1	34.5	36.7	38.9	39	38.6	37.4	-0.0136051
138	846	D	9	6	65	67	85.96	96.36	82.08	32.9	35.7	36.6	36.2	35.9	37.9	40.3	40.3	39.8	39	0.0639145
138	846	D	9	6	73	75	86.04	96.44	82.143	30.1	33.7	35.1	35.2	35.7	38.9	41.7	42.4	41.5	40.8	-0.258629
138	846	D	9	6	81	83	86.12	96.52	82.206	28.3	31.7	33.1	33.7	34.3	38.6	42	42.4	42.6	42.3	-0.466868
138	846	D	9	6	89	91	86.2	96.6	82.269	27.7	30.9	32.6	33.5	34.2	38.3	41.7	42	42.1	41.9	-0.537944
138	846	D	9	6	97	99	86.28	96.68	82.332	27.6	31.1	33	33.7	34.6	38.5	41.4	42.2	42	40.6	-0.551867
138	846	D	9	6	105	107	86.36	96.76	82.395	28	31.6	33.4	34.4	35.4	38.8	41.6	42.2	42	41.6	-0.508638
138	846	D	9	6	113	115	86.44	96.84	82.458	27.2	30.8	32.5	33.3	34.4	38.2	41.3	42	41.8	41.2	-0.602574
138	846	D	9	6	121	123	86.52	96.92	82.521	22.3	25.5	27.3	28.5	29.8	34.7	38.3	39.2	39.3	39.1	-1.16516
138	846	D	9	6	129	131	86.6	97	82.584	20.9	23.9	25.8	27.2	28.8	34.3	38.4	39.8	40.3	40.7	-1.32767
138	846	D	9	6	137	139	86.68	97.08	82.647	19.4	22.4	24.4	25.7	27.3	32.9	37.1	38.5	39	39.1	-1.50162
138	846	D	9	6	145	147	86.76	97.16	82.717	20	22.8	24.6	25.8	27.2	33.2	37.6	39	39.5	39.6	-1.43553
138	846	D	9	7	1	3	86.82	97.22	82.7783	20.3	23.2	25.1	26.2	27.6	33	37	38.2	38.5	38.2	-1.40311
138	846	D	9	7	9	11	86.9	97.3	82.8601	19.2	22	23.9	25	26.5	31.8	35.7	36.9	37.1	36.9	-1.53134
138	846	D	9	7	17	19	86.98	97.38	82.9419	19.2	22.1	24	25.3	26.8	32.6	36.8	38.3	38.7	38.3	-1.53383
138	846	D	9	7	25	27	87.06	97.46	83.0236	19.4	22.3	24.2	25.4	26.8	32.5	36.8	38.1	38.2	38.2	-1.51346
138	846	D	9	7	33	35	87.14	97.54	83.1054	21.1	24.1	25.7	26.5	27.4	31.9	35.4	36.1	36.1	35.7	-1.32164
138	846	D	9	7	41	43	87.22	97.62	83.1871	19.2	22	23.5	24.4	25.5	30.5	34.3	35.3	35.2	34.9	-1.54131
138	846	D	9	7	49	51	87.3	97.7	83.2689	16.8	19.2	20.6	21.5	22.6	27.2	30.9	31.7	31.8	31.5	-1.81813
138	846	D	9	7	57	59	87.38	97.78	83.3507	17.5	20.3	22	23.1	24.7	30.4	34.8	36	36.4	36.3	-1.74061
138	846	D	9	7	65	67	87.46	97.86	83.4324	18.1	21.1	22.9	24.1	25.7	31.8	36.5	38.1	38.5	38.5	-1.67452
138	846	D	9	7	73	75	87.54	97.94	83.5142	20	22.8	24.5	25.4	26.5	31.4	35.2	36.2	36.2	36.1	-1.45984
138	846	D	9	7	81	83	87.62	98.02	83.5959	28.1	31.6	33.1	33.7	34.2	37.6	40.7	41	40.6	40	-0.536473
138	846	B	10	2	101	103	85.52	98.11	83.6082	37.5	39.3	39.9	40	40.4	43.7	47	48.1	48.7	50.7	-0.564529
138	846	B	10	2	105	107	85.56	98.15	83.6493	40.4	42.4	43.1	43.1	43.4	46.4	49.5	50.4	50.9	52.7	-0.263383
138	846	D	9	7	89	91	87.7	98.1	83.6777	32	35.2	36.5	36.7	36.9	39.6	42.3	42.6	41.8	41.3	-0.0931813
138	846	B	10	2	109	111	85.6	98.19	83.6903	40.5	41.9	42.1	41.8	41.8	44.7	47.5	48.2	48.8	50.4	-0.2536
138	846	B	10	2	113	115	85.64	98.23	83.7342	48.1	49.2	49.3	48.9	48.6	51	53.6	54.4	55.1	57.1	0.536622
138	846	B	10	2	117	119	85.68	98.27	83.7788	36.8	38.3	39.2	39.4	40	44.4	48	49.5	50.5	52.6	-0.639859
138	846	B	10	2	121	123	85.72	98.31	83.8234	49	50.5	50.6	49.8	49.1	51.3	53.9	54.7	55.1	56.9	0.62903
138	846	B	10	2	125	127	85.76	98.35	83.868	49.1	50.1	49.8	49.1	48.4	50.5	53	53.8	54.9	55.9	0.638814
138	846	B	10	2	129	131	85.8	98.39	83.9126	48.1	49.1	48.8	48.2	47.4	49.7	52.1	53.2	53.6	56	0.534133
138	846	B	10	2	133	135	85.84	98.43	83.9572	50.8	51.5	51.3	50.3	49.3	51.2	53.5	54.4	54.9	56.4	0.814468
138	846	B	10	2	137	139	85.88	98.47	84.0019	47.4	48.4	48.2	47.6	47	49.1	51.6	52.2	52.9	54.1	0.460049
138	846	B	10	2	141	143	85.92	98.51	84.0464	51.1	51.8	51.4	50.5	49.6	51.4	53.9	54.6	55.1	56.7	0.844442
138	846	B	10	2	145	147	85.96	98.57	84.1134	46.3	47.2	47	46	45.2	47.3	49.8	50.7	51.3	52.9	0.344029
138	846	B	10	3	1	3	86.02	98.61	84.1579	45.4	46.5	46.3	45.5	44.8	47	49.7	50.6	51	52.9	0.249755
138	846	B	10	3	5	7	86.06	98.65	84.2026	44.5	45.3	45.3	44.6	43.9	46.3	49.2	49.8	50.8	52.3	0.15548
138	846	B	10	3	9	11	86.1	98.69	84.2471	46.3	46.9	46.5	45.6	44.9	47	49.5	50.4	51.2	52.8	0.342162
138	846	B	10	3	13	15	86.14	98.73	84.2918	47.6	48.8	48.7	48	47.2	49.3	51.9	52.7	53.1	54.6	0.476817
138	846	B	10	3	17	19	86.18	98.77	84.3316	46.4	47	46.9	46.3	45.7	47.9	50.7	51.7	52.5	54.1	0.351325
138	846	B	10	3	21	23	86.22	98.81	84.3693	49.9	50.5	50.2	49.4	48.6	50.5	53	53.9	54.3	56.4	0.714907
138	846	B	10	3	25	27	86.26	98.85	84.407	48	48.8	48.8	48.3	47.8	50.1	52.8	53.5	54.1	55.9	0.516573
138	846	B	10	3	29	31	86.3	98.89	84.4446	47.6	49	49.3	49	49	51.4	54.3	55	55.5	57.8	0.474328
138	846	D	10	1	28	30	87.59	98.89	84.456	35.2	37.7	38.3	38.1	37.7	40	42.2	42.5	41.8	41.9	0.247972
138	846	D	10	1	36	38	87.67	98.97	84.531	37.4	40.3	41.3	41.3	41	43.3	45.8	45.8	45	44.6	0.496947
138	846	D	10	1	44	46	87.75	99.05	84.6061	38.1	41.6	42.4	42.4	42.1	44.3	46.4	46.5	45.6	44.4	0.574467
138	846	D	10	1	52	54	87.83	99.13	84.6812	36	39.3	40.2	40.3	40.2	42.5	44.8	44.7	44	43.4	0.331936
138	846	D	10	1	60	62	87.91	99.21	84.7562	35.5	39.1	40.2	40.3	40.2	42.9	45.4	45.4	44.9	43.5	0.272291
138	846	D	10	1	68	70	87.99	99.29	84.8313	37.5	41.1	42.3	42	41.8	44.2	46.4	46.6	45.5	44.6	0.498406
138	846	D	10	1	76	78	88.07	99.37	84.9063	33.9	37.4	38.3	38.3	38.1	40.9	43.3	43.8	42.9	42.7	0.0844195
138	846	D	10	1	84	86	88.15	99.45	84.9799	34.6	37.7	38.4	38.2	37.9	40.2	42.6	42.6	42	40.9	0.161939
138	846	D	10	1	92	94	88.23	99.53	85.0493	35.1	37.8	38.4	37.9	37.3	39.3	41.5	41.5	40.6	40.1	0.216598
138	846	D	10	1	100	102	88.31	99.61	85.1186	33.2	36.1	36.8	36.3	35.8	37.9	40.2	40.3	39.8	38.8	-0.00307201
138	846	D	10	1	108	110	88.39	99.69	85.1852	33	36.1	36.8	36.5	36.1	38.2	40.7	40.6	39.8	39.1	-0.0284257
138	846	D	10	1	116	118	88.47	99.77	85.25	36.4	39.2	39.9	39.4	38.8	40.6	42.8	42.7	42	41.2	0.357714
138	846	D	10	1	124	126	88.55	99.85	85.314	30	33	34.1	34	34	36.6	39.2	39.4	38.8	37.9	-0.376323
138	846	D	10	1	132	134	88.63	99.93	85.3779	34.3	37.6	38.5	38	37.5	39.5	41.8	41.8	40.8	39.9	0.11269
138	846	D	10	1	140	142	88.71	100.01	85.4419	33.7	36.3	37.3	37.2	37.2	39.7	42.2	42.5	41.9	41.1	0.0416149
138	846	D	10	2	1	3	88.82	100.12	85.5298	42	44.5	45.1	44.9	44.4	46.2	48.3	48.3	47.5	46.7	0.986907
138	846	D	10	2	9	11	88.9	100.2	85.5938	39.6	41.7	42.2	41.8	41.5	43.2	45.4	45.7	45	44.2	0.710086
138	846	D	10	2	17	19	88.98	100.28	85.6578	43.6	46.7	47.3	46.8	46.1	47.9	49.7	49.9	48.9	48	1.16481
138	846	D	10	2	25	27	89.06	100.36	85.722	44.6	47.9	48.7	48.5	48	49.9	51.8	51.9	50.8	50.5	1.27662
138	846	D	10	2	33	35	89.14	100.44	85.7879	33.4	36.2	37.2	37.4	37.7	40.7	43.4	44	43.6	43.5	-0.00607602
138	846	D	10	2	41	43	89.22	100.52	85.8621	39.8	43.7	44.9	45.1	45.1	47.5	49.8	49.9	49.3	48.2	0.722974
138	846	D	10	2	49	51	89.3	100.6	85.937	35.5	39.3	40.6	41.1	41.5	44.5	47.2	47.5	46.8	46.4	0.228976
138	846	D	10	2	57	59	89.38	100.68	86.0121	34.1	37.6	39	39.4	39.6	42.6	45.2	45.6	45	44.7	0.0664576
138	846	D	10	2	65	67	89.46	100.76	86.0871	29.9	33	34.4	34.9	35.5	38.8	41.7	42.1	41.8	41.2	-0.416111
138	846	D	10	2	73	75	89.54	100.84	86.1622	29.4	32.5	33.9	34.3	34.5	37.6	40.4	40.8	40.4	39.6	-0.475756
138	846	D	10	2	81	83	89.62	100.92	86.2372	29.8	32.8	33.8	33.8	33.6	36.2	38.8	39	38.3	37.7	-0.432527
138	846	D	10	2	89	91	89.7	101	86.3123	22.2	24.9	26.5	27.4	28.6	33	36.5	37.4	37.5	37	-1.30373
138	846	D	10	2	97	99	89.78	101.08	86.3873	20.8	23.9	25.8	26.9	28.5	34.1	38.3	39.7	40.1	40	-1.46625
138	846	D	10	2	105	107	89.86	101.16	86.4606	19.7	22.8	24.6	26	27.7	33.6	38	39.6	40	40.3	-1.59447
138	846	D	10	2	113	115	89.94	101.24	86.5306	22.7	25.8	27.5	28.8	30.4	35.4	39.2	40.4	40.6	40.5	-1.25406
138	846	D	10	2	121	123	90.02	101.32	86.6001	23.9	27.2	29.5	30.8	32.4	38.5	42.7	44.4	44.7	44.9	-1.11938
138	846	D	10	2	129	131	90.1	101.4	86.6696	25.8	29.3	31.4	32.5	33.7	39	42.7	43.8	43.9	43.8	-0.9047
138	846	D	10	2	137	139	90.18	101.48	86.7411	30.1	33.4	35.1	35.7	36.4	40.2	43.3	43.8	43.7	43.4	-0.415687
138	846	D	10	2	145	147	90.26	101.56	86.8147	38.8	42.7	44.3	44.8	45.2	48	50.5	50.7	50	49.3	0.576262
138	846	D	10	3	1	3	90.32	101.62	86.8711	39.7	44	45.6	46.2	46.9	49.7	52.3	52.4	51.7	51.4	0.677266
138	846	D	10	3	9	11	90.4	101.7	86.9464	38.5	41.6	43	43.2	43.2	45.8	48.4	48.8	48	47.7	0.537608
138	846	D	10	3	17	19	90.48	101.78	87.0216	37.6	41	42.2	42.2	42.2	44.8	47.4	47.7	46.9	46.4	0.432242
138	846	D	10	3	25	27	90.56	101.86	87.0968	38.8	42.1	43	43.1	42.9	45.1	47.4	47.5	47.1	46.8	0.566913
138	846	D	10	3	33	35	90.64	101.94	87.1718	36.5	39.9	41.1	41.1	41.1	43.8	46.3	46.5	45.9	45.2	0.301522
138	846	D	10	3	41	43	90.72	102.02	87.2468	33.9	36.7	37.4	37.1	36.6	38.8	41.1	41.2	40.7	40.6	0.00183932
138	846	D	10	3	49	51	90.8	102.1	87.3219	34.8	37.9	38.2	37.5	36.8	38.5	40.8	40.8	39.8	38.6	0.10222
138	846	D	10	3	57	59	90.88	102.18	87.3969	37.1	39.4	40.1	39.5	38.6	40.3	42.6	42.4	41.3	41.1	0.362625
138	846	D	10	3	65	67	90.96	102.26	87.4719	40	42.7	43.2	42.5	41.6	42.9	45.1	45.1	44.1	42.9	0.691613
138	846	D	10	3	73	75	91.04	102.34	87.547	33.9	36.3	36.9	37	36.9	39.4	42	42.6	42	41.6	-0.00813263
138	846	D	10	3	81	83	91.12	102.42	87.622	43.6	47.1	47.6	47	46.4	47.9	49.7	49.6	48.8	47.9	1.09812
138	846	D	10	3	89	91	91.2	102.5	87.6961	38.1	40.1	40.8	40.2	39.8	41.7	43.6	44.1	43.4	43	0.466957
138	846	D	10	3	97	99	91.28	102.58	87.7672	41.5	44.5	44.9	44.4	43.6	45.1	47	47	46.4	45.3	0.853096
138	846	D	10	3	105	107	91.36	102.66	87.8366	38	41.4	42.4	42.3	42.2	44.5	46.9	46.9	46.6	45.6	0.45054
138	846	D	10	3	113	115	91.44	102.74	87.9056	33.8	37.2	38.4	38.7	38.9	41.6	44.3	44.4	43.9	43.4	-0.0320279
138	846	D	10	3	121	123	91.52	102.82	87.9748	32.7	36.2	37.6	38.1	38.4	41.1	43.7	44	43.5	42.8	-0.160255
138	846	D	10	3	129	131	91.6	102.9	88.0442	24.8	28.1	29.9	30.9	32	36.9	40.6	41.9	41.8	41.4	-1.06575
138	846	D	10	3	137	139	91.68	102.98	88.1137	25.5	28.8	30.5	31.3	32.1	36	39.3	40	39.4	38.9	-0.988227
138	846	D	10	3	145	147	91.76	103.06	88.1831	25.1	28.2	29.5	30.3	31.3	35.3	38.4	38.9	38.9	38.8	-1.03644
138	846	D	10	4	1	3	91.82	103.12	88.235	23.1	26.3	28.1	29.2	30.5	35.2	38.8	39.8	39.7	39.3	-1.26692
138	846	D	10	4	9	11	91.9	103.2	88.3041	23.7	26.7	28.4	29.2	30.1	33.9	37.1	37.8	37.5	37	-1.20083
138	846	D	10	4	17	19	91.98	103.28	88.3736	25.2	28.4	30.1	30.7	31.3	34.8	37.8	38.2	37.8	37.2	-1.03187
138	846	D	10	4	25	27	92.06	103.36	88.4454	23.9	27.2	28.8	29.5	30.3	34.5	37.7	38.3	38	37.8	-1.18295
138	846	D	10	4	33	35	92.14	103.44	88.5205	25.9	28.9	30.5	30.9	31.3	34.6	37.5	38	37.2	36.2	-0.956841
138	846	D	10	4	41	43	92.22	103.52	88.5955	28.8	31.4	32.4	32.3	32	34.4	37	37.4	36.6	35.6	-0.627853
138	846	D	10	4	49	51	92.3	103.6	88.6705	35.1	38.2	38.9	38.7	38.4	40.4	42.8	42.7	41.8	42	0.0897672
138	846	D	10	4	57	59	92.38	103.68	88.7424	41.8	44.5	44.4	43.5	42.3	43.5	45.3	45.1	44.4	43.2	0.853109
138	846	D	10	4	65	67	92.46	103.76	88.8097	45.2	48.9	49.2	48.1	46.7	47.7	49.3	49.1	48.2	46.8	1.23925
138	846	D	10	4	73	75	92.54	103.84	88.8727	38.4	41.4	41.3	40.3	39	40.1	42.1	42	41.1	40.2	0.45949
138	846	D	10	4	81	83	92.62	103.92	88.9357	38	40.8	41.3	40.5	39.4	40.9	43	43	42.2	41.2	0.411276
138	846	D	10	4	89	91	92.7	104	88.9986	38.4	40.7	41.1	40.5	39.6	41.4	43.5	43.6	42.7	42.4	0.454504
138	846	D	10	4	97	99	92.78	104.08	89.0613	38.4	40.7	41.2	40.7	40	41.7	43.9	44	43.2	42.2	0.452011
138	846	D	10	4	105	107	92.86	104.16	89.1238	38.2	40.5	40.6	40	39	40.8	42.8	42.7	42.4	41.4	0.426658
138	846	D	10	4	113	115	92.94	104.24	89.1863	39.2	41.6	42	41.2	40.5	42	43.9	44.2	42.9	42.7	0.538468
138	846	D	10	4	121	123	93.02	104.32	89.2486	37.1	39.9	40.5	39.8	39.2	41.2	43.3	43.4	42.7	41.9	0.295938
138	846	D	10	4	129	131	93.1	104.4	89.3102	43.2	46.3	46.4	45.1	43.4	44.4	46.2	45.9	44.5	43	0.990697
138	846	D	10	4	137	139	93.18	104.48	89.3718	40.3	43.1	43.4	42.6	41.8	43.5	45.3	45	44.7	44.3	0.656723
138	846	D	10	4	145	147	93.26	104.56	89.4331	42.6	44.8	45.2	44.3	42.9	44.2	46	45.6	44.7	43.7	0.917129
138	846	D	10	5	1	3	93.32	104.62	89.479	41.8	45.3	45.7	44.9	43.9	45.3	47.3	47.1	46.1	45.1	0.823816
138	846	D	10	5	9	11	93.4	104.7	89.5398	40.3	43	43.5	42.9	42	43.7	45.6	45.5	44.7	44.2	0.649868
138	846	D	10	5	17	19	93.48	104.78	89.6006	36.4	38.9	39.5	38.9	38.1	39.8	42.2	41.9	41.4	40.4	0.20159
138	846	D	10	5	25	27	93.56	104.86	89.6612	36.8	39.6	40.2	39.6	38.6	40.6	42.6	42.4	41.9	40.6	0.244819
138	846	D	10	5	33	35	93.64	104.94	89.7217	35.7	38.9	39.3	38.5	37.4	39	41.3	40.9	40.4	38.9	0.116592
138	846	D	10	5	41	43	93.72	105.02	89.7822	34.1	36.7	37.1	36.6	35.8	37.9	39.9	40.2	39.4	38.4	-0.068787
138	846	D	10	5	49	51	93.8	105.1	89.8427	37.9	40.6	41.4	40.8	40.2	41.9	44.2	44	43.4	42.5	0.363074
138	846	D	10	5	57	59	93.88	105.18	89.9032	41.9	44.6	45.2	44.9	44.5	46.3	48.5	48.6	47.5	46.8	0.817796
138	846	D	10	5	65	67	93.96	105.26	89.964	45.1	48	48.5	48.1	47.4	48.9	50.8	50.8	50	49.4	1.18107
138	846	D	10	5	73	75	94.04	105.34	90.0254	45.3	48.2	48.9	48.4	47.6	48.9	50.8	50.6	49.6	49.5	1.20144
138	846	D	10	5	81	83	94.12	105.42	90.0871	42.5	45.6	46.4	45.9	45.2	47.3	49.4	49.2	48	47.5	0.878899
138	846	D	10	5	89	91	94.2	105.5	90.1489	45.2	48.4	49.4	49.5	49.4	51.4	53.4	53.6	52.7	51.8	1.18503
138	846	D	10	5	97	99	94.28	105.58	90.211	39.6	42.9	43.8	44	44.3	46.7	49.1	49.2	48.9	48.2	0.542432
138	846	D	10	5	105	107	94.36	105.66	90.2733	40.6	43.6	45	45.6	46	48.6	51.1	51.4	50.9	50.1	0.654243
138	846	D	10	5	113	115	94.44	105.74	90.3356	40	44.1	45.8	46.5	47.3	50.6	53.1	53.4	53.3	52.3	0.583168
138	846	D	10	5	121	123	94.52	105.82	90.3979	33.5	37.1	39	39.8	41	45.5	48.7	49.6	49.4	49.5	-0.162299
138	846	D	10	5	129	131	94.6	105.9	90.4608	36.2	40.2	41.7	42.6	43.3	47	49.7	50.1	50.2	49.2	0.143828
138	846	D	10	5	137	139	94.68	105.98	90.5238	37.1	40.4	42.2	42.7	43.6	46.8	49.6	50	49.9	49.1	0.244208
138	846	D	10	5	145	147	94.76	106.06	90.5867	33.7	37.9	39.6	40.7	41.6	45.4	48.3	49.1	48.6	48.4	-0.146917
138	846	D	10	6	1	3	94.82	106.12	90.634	33.3	36.9	38.8	39.8	40.9	44.7	47.6	48.2	48.1	48.2	-0.194508
138	846	D	10	6	9	11	94.9	106.2	90.7047	29.4	33.1	35	36.1	37.6	42.4	45.9	46.7	46.3	46	-0.642786
138	846	D	10	6	17	19	94.98	106.28	90.7785	28.8	32.4	34.4	35.6	37.1	41.9	45.2	45.9	45.9	46	-0.713861
138	846	D	10	6	25	27	95.06	106.36	90.8535	27	30.6	32.7	34.1	35.5	40.4	43.9	45	45.3	45.1	-0.922101
138	846	D	10	6	33	35	95.14	106.44	90.9286	24.4	27.7	29.6	30.9	32.6	38	41.8	43	43.4	43.5	-1.22178
138	846	D	10	6	41	43	95.22	106.52	91.0038	23.1	26.2	28.1	29.5	31.1	36.3	39.9	41	41.1	41.3	-1.37287
138	846	D	10	6	49	51	95.3	106.6	91.0808	22.9	26.3	28.3	29.6	31.2	36.8	40.8	42.1	42.9	43.4	-1.39822
138	846	D	10	6	57	59	95.38	106.68	91.158	24.6	27.9	29.8	31.2	32.8	38.4	42.4	43.8	44.1	44.2	-1.2064
138	846	D	10	6	65	67	95.46	106.76	91.2351	26.1	29.8	31.8	33	34.6	39.8	43.7	45.2	45.5	45.2	-1.03744
138	846	D	10	6	73	75	95.54	106.84	91.3122	29	32.7	34.7	36.2	37.9	42.5	46	47.1	47.2	47	-0.708451
138	846	D	10	6	81	83	95.62	106.92	91.389	29.9	33	35	36.5	38	42.6	46.1	47.1	47.2	47.1	-0.608071
138	846	D	10	6	89	91	95.7	107	91.4659	31.4	34.6	36.6	38	39.5	43.8	47.3	48.4	48	47.5	-0.439108
138	846	D	10	6	97	99	95.78	107.08	91.5435	29.3	32.7	34.4	35.5	36.9	41.3	44.6	45.6	45.6	46	-0.681639
138	846	D	10	6	105	107	95.86	107.16	91.6216	28.1	31.6	33.6	34.9	36.4	41.3	44.9	45.9	46.2	45.8	-0.821296
138	846	D	10	6	113	115	95.94	107.24	91.6998	28.5	32.2	34.1	35.5	37.1	41.7	45.2	46.1	46.3	46.4	-0.778068
138	846	D	10	6	121	123	96.02	107.32	91.7784	29.9	33	34.9	35.9	37.2	41.4	44.7	45.5	45.6	45.5	-0.620536
138	846	D	10	6	129	131	96.1	107.4	91.8573	31	34.2	36	37.2	38.4	42.3	45.3	46.2	46.4	46.5	-0.497295
138	846	D	10	6	137	139	96.18	107.48	91.9369	31.2	34.7	36.5	37.8	39.3	43.6	46.8	47.5	47.5	48	-0.476927
138	846	D	10	6	145	147	96.26	107.56	92.0174	28.2	32	33.8	34.7	36	40.5	43.9	44.7	44.3	43.4	-0.822331
138	846	D	10	7	1	3	96.32	107.62	92.0781	33.5	36.7	38.3	39.2	40.1	43.7	46.6	47.3	47.1	46.8	-0.218391
138	846	D	10	7	9	11	96.4	107.7	92.1604	34	37	38.3	38.9	39.6	42.8	45.5	45.6	45.2	45.6	-0.163732
138	846	D	10	7	17	19	96.48	107.78	92.2431	36.2	39.5	40.8	41.3	41.5	44.6	47.3	47.5	46.9	46.4	0.0852427
138	846	D	10	7	25	27	96.56	107.86	92.3262	37.8	41.2	42.4	42.6	42.8	45.7	48.4	48.6	48	47.3	0.265636
138	846	D	10	7	33	35	96.64	107.94	92.4096	35.2	38.5	39.7	39.8	39.9	42.7	45.3	45.5	45.2	44.5	-0.034047
138	846	D	10	7	41	43	96.72	108.02	92.4929	40.5	43.7	44.6	44.5	44.3	46.5	48.7	48.8	48.1	47.2	0.569269
138	846	D	10	7	49	51	96.8	108.1	92.5753	37.2	39.6	40.4	40.3	40.2	42.7	45.1	45.6	45.4	45.3	0.189574
138	846	D	10	7	57	59	96.88	108.18	92.6566	41.8	44.9	45.9	45.8	45.8	48.4	50.9	51.1	50.5	49.9	0.712878
138	846	D	10	7	65	67	96.96	108.26	92.7373	46.8	50.4	51.1	50.5	49.8	51.3	53.2	53.2	52.2	51.6	1.2819
138	846	D	10	7	73	75	97.04	108.34	92.817	39.3	42.8	44	44.1	44.1	47	49.5	49.8	49.2	48.3	0.422133
138	846	B	11	2	61	63	94.62	108.16	92.8496	56.2	57.1	56.7	56.4	55.8	58.2	60.9	61.8	62.9	65.1	1.22505
138	846	B	11	2	65	67	94.66	108.2	92.8827	49.7	51	51.6	51.6	52	55.9	59.2	60.5	62.2	64.2	0.548053
138	846	D	10	7	81	83	97.12	108.42	92.8886	42.8	46.5	47.5	47.4	47.3	49.8	52.1	52.3	51.6	51.2	0.819703
138	846	B	11	2	69	71	94.7	108.24	92.9158	49.5	50	49.9	49.4	49.6	52.6	55.7	56.9	58.2	60.6	0.526618
138	846	B	11	2	73	75	94.74	108.28	92.9489	51.9	52	51.7	51.1	50.9	53.5	56.3	57.4	58.4	61.1	0.775736
138	846	B	11	2	77	79	94.78	108.32	92.982	58.3	58.9	58.7	58	57.6	59.7	62.2	63.2	64.4	66.9	1.44108
138	846	B	11	2	81	83	94.82	108.36	93.0151	44.5	45.4	45.5	45.2	45.4	48.9	52.5	54.1	55.5	58	0.00446075
138	846	B	11	2	85	87	94.86	108.4	93.0482	53.2	53.2	52.7	52	51.7	54	56.7	57.8	58.9	61.6	0.909146
138	846	B	11	2	89	91	94.9	108.44	93.0813	61.3	62.7	62.6	61.7	61.2	63.2	65.6	66.9	67.8	69.3	1.75139
138	846	B	11	2	93	95	94.94	108.48	93.1144	62.8	63.7	63.9	63.2	63.3	65.5	67.9	69.1	70.2	72.2	1.90686
138	846	B	11	2	97	99	94.98	108.52	93.1475	69.4	70.3	69.8	68.4	67.4	68.3	70.2	70.9	71.5	73.8	2.59302
138	846	B	11	2	101	103	95.02	108.56	93.1806	62.3	62.5	61.9	61.2	61	63.1	65.6	66.7	67.8	70.4	1.85359
138	846	B	11	2	105	107	95.06	108.6	93.2137	58.7	59.1	59	58.4	58.2	60.5	63.1	64.1	65.5	67.8	1.47836
138	846	B	11	2	109	111	95.1	108.64	93.2468	53.6	54.1	53.6	53.1	52.9	55.3	58	59.3	60.8	63	0.947037
138	846	B	11	2	113	115	95.14	108.68	93.279	55.4	55.7	55.6	55.4	55.5	58	60.7	62.1	63.5	65.6	1.13372
138	846	B	11	2	117	119	95.18	108.72	93.3121	51.3	51.3	51.1	50.7	50.6	53.2	56.1	57.4	58.9	61.5	0.706458
138	846	B	11	2	121	123	95.22	108.76	93.3451	49.3	49.4	49.3	49.1	49.1	51.8	54.8	56.3	57.4	60	0.497719
138	846	B	11	2	125	127	95.26	108.8	93.3782	48.4	48.8	48.7	48.4	48.5	51.3	54.4	55.7	57.1	59.7	0.403444
138	846	B	11	2	129	131	95.3	108.84	93.4113	53.5	54	54	53.5	53.3	55.9	58.6	59.8	61	63.3	0.93352
138	846	B	11	2	133	135	95.34	108.88	93.4444	50.9	51.7	51.2	50.6	49.8	52.1	54.8	55.9	57.1	58.9	0.662346
138	846	B	11	2	137	139	95.38	108.92	93.4775	54.3	55.6	55	53.7	52.9	54.4	57	57.9	58.2	60.9	1.01552
138	846	B	11	2	141	143	95.42	108.96	93.5106	52.5	52.3	52.1	51.2	50.9	52.8	55.5	56.7	57.7	59.7	0.827595
138	846	B	11	2	145	147	95.46	109.02	93.5607	51.5	51.6	51	50	49.1	50.8	53.5	54.7	55.3	58.1	0.722603
138	846	B	11	3	1	3	95.52	109.06	93.5938	51.5	52.4	52.1	50.7	49.5	51	53.6	54.5	55	57.5	0.721981
138	846	B	11	3	5	7	95.56	109.1	93.6269	55.6	56.1	55.6	54.2	52.9	54.4	56.8	57.7	58.3	60.3	1.148
138	846	B	11	3	9	11	95.6	109.14	93.66	44.5	44.7	44.2	43.7	43.5	46.2	49.4	50.7	52.1	54.8	-0.0076707
138	846	B	11	3	13	15	95.64	109.18	93.6931	52.1	51.7	51	50	49	50.8	53.5	54.4	55.4	57.7	0.78255
138	846	B	11	3	17	19	95.68	109.22	93.726	44.4	44.6	44.4	44	43.9	47.2	50.4	52	53.3	55.9	-0.0193208
138	846	B	11	3	21	23	95.72	109.26	93.7588	54.8	54.9	54.3	53.4	52.7	54.8	57.4	58.5	59.9	61.9	1.06226
138	846	B	11	3	25	27	95.76	109.3	93.7917	58.1	59.1	58.8	57.5	56.7	58.3	60.6	61.7	62.2	64.3	1.40503
138	846	B	11	3	29	31	95.8	109.34	93.8254	53.6	53.3	52.5	51.5	50.7	52.7	55.3	56.4	57.7	60.1	0.93615
138	846	B	11	3	33	35	95.84	109.38	93.8602	56.1	56.3	55.6	54.3	53.1	54.8	57.1	58.1	58.9	60.9	1.19567
138	846	D	11	1	19	21	97	109.4	93.8736	37.5	39.1	39.3	38.9	38.2	40.2	42.7	42.8	42.6	42.3
138	846	B	11	3	37	39	95.88	109.42	93.8982	61.8	62	61.3	59.3	57.8	58.5	60.7	61.1	61.8	63.6	1.78818
138	846	B	11	3	41	43	95.92	109.46	93.9385	57.7	57	56.4	54.9	54	55.4	57.8	58.8	59.8	62	1.36092
138	846	D	11	1	27	29	97.08	109.48	93.9497	43.4	45.8	45.8	45.1	44.2	45.6	47.8	47.5	47	47	0.855253
138	846	D	11	1	35	37	97.16	109.56	94.0266	43.6	45.7	45.7	44.7	43.9	45.4	47.2	47.1	47.1	46.3	0.875621
138	846	D	11	1	43	45	97.24	109.64	94.1035	40.2	42.2	42.5	41.9	41.3	43	45.3	45.8	44.9	44.6	0.484495
138	846	D	11	1	51	53	97.32	109.72	94.1806	43.6	46.3	46.9	46.2	45.4	47.1	49.1	49.3	48.4	47.8	0.870635
138	846	D	11	1	59	61	97.4	109.8	94.2578	45	47.9	48.1	47.4	46.5	47.8	49.8	49.8	49	48.9	1.02817
138	846	D	11	1	67	69	97.48	109.88	94.335	39.8	42	42.2	41.5	40.8	42.4	44.5	44.9	44.2	44.1	0.431295
138	846	D	11	1	75	77	97.56	109.96	94.412	44.2	47	47.5	46.7	45.9	47.5	49.4	49.6	48.7	48.1	0.931738
138	846	D	11	1	83	85	97.64	110.04	94.4889	51.1	53.8	53.7	52.4	50.6	51.1	52.7	52.3	51.5	51	1.71794
138	846	D	11	1	91	93	97.72	110.12	94.5658	44.1	46.4	47	46.8	46.1	48.2	50.3	50.5	50.4	49.2	0.915322
138	846	D	11	1	99	101	97.8	110.2	94.6429	47.9	50.4	50.9	50.3	49.3	51	52.7	53	52.1	50.8	1.34718
138	846	D	11	1	107	109	97.88	110.28	94.72	37.9	40.4	40.8	40.5	40.1	42.2	44.7	44.7	44.8	44.3	0.201653
138	846	D	11	1	115	117	97.96	110.36	94.7972	39.9	43.3	44.1	43.7	43.3	45.3	47.6	47.6	47	46.4	0.427767
138	846	D	11	1	123	125	98.04	110.44	94.8738	35.4	38.6	39.8	39.8	39.9	42.8	45.2	45.6	45.2	44.5	-0.0890921
138	846	D	11	1	131	133	98.12	110.52	94.949	35.2	38.8	40.3	40.3	40.5	43.6	46.1	46.4	45.9	45.3	-0.114446
138	846	D	11	1	139	141	98.2	110.6	95.024	34.7	38.1	39.7	40.1	40.2	43.3	46	46.2	45.7	45.3	-0.174091
138	846	D	11	2	1	3	98.32	110.72	95.1365	39.7	43.9	45.4	46	46.3	49.7	52.1	52.4	52	50.7	0.393688
138	846	D	11	2	9	11	98.4	110.8	95.2091	32.3	35.8	37.5	38.5	39.3	43.5	46.5	47.1	46.7	46.3	-0.454652
138	846	D	11	2	17	19	98.48	110.88	95.2786	30.7	34.6	36.5	37.6	39.1	44.1	47.8	48.9	48.6	48.7	-0.640031
138	846	D	11	2	25	27	98.56	110.96	95.3478	30.6	34.6	36.2	37.4	38.5	42.8	46.4	46.9	46.6	46.9	-0.653954
138	846	D	11	2	33	35	98.64	111.04	95.4169	30.5	34.6	36.4	36.8	37.6	41.5	44.5	45.4	44.6	44.2	-0.667877
138	846	D	11	2	41	43	98.72	111.12	95.4848	33.3	36.6	38	38.4	38.7	42.2	45.1	45.4	45.4	45.1	-0.35032
138	846	D	11	2	49	51	98.8	111.2	95.5487	36.9	40.4	41.8	42	42.2	45.2	48	48.3	47.8	47.9	0.05868
138	846	D	11	2	57	59	98.88	111.28	95.6127	39.2	42.8	44	44	43.9	46.8	49.3	49.6	49.5	48.8	0.319085
138	846	D	11	2	65	67	98.96	111.36	95.6767	44	46.5	47.6	47.4	47.2	49.4	51.8	52	51.7	50.9	0.86525
138	846	D	11	2	73	75	99.04	111.44	95.7418	43.9	46.8	47.7	47.3	46.8	49	51	50.9	50.9	50.2	0.851327
138	846	D	11	2	97	99	99.28	111.68	95.9464	48	50.5	50.8	50.6	50.4	52.2	53.9	54.3	54.2	53.2	1.31249
138	846	D	11	2	105	107	99.36	111.76	96.0156	47.1	49.4	49.7	49	48.2	50	51.9	51.9	51.3	51	1.20713
138	846	D	11	2	113	115	99.44	111.84	96.0857	44.5	47.2	47.7	47.4	47.1	49.1	51.3	51.5	51	50.7	0.907444
138	846	D	11	2	121	123	99.52	111.92	96.1575	39.6	43.5	44.7	44.9	45.6	49.3	52.1	52.4	52.1	52.2	0.344863
138	846	D	11	2	129	131	99.6	112	96.2326	44.9	48.4	49.5	49.8	49.7	52.4	54.9	55.1	54.5	54	0.948179
138	846	D	11	2	137	139	99.68	112.08	96.3076	44.1	47.3	48.5	48.6	48.7	51.3	53.8	54.2	53.7	53.7	0.854244
138	846	D	11	2	145	147	99.76	112.16	96.3827	42.8	45.6	46.5	46.4	46.4	48.7	51.1	51.6	51.2	51.3	0.703156
138	846	D	11	3	1	3	99.82	112.22	96.439	43.7	46.9	48.2	48.2	48	50.4	52.5	52.9	52.3	51.5	0.804159
138	846	D	11	3	9	11	99.9	112.3	96.514	40.5	44.4	45.5	45.8	45.8	48.6	51.2	51.4	51.3	50.6	0.435895
138	846	D	11	3	17	19	99.98	112.38	96.589	42.4	46.1	47.2	47.3	47.4	49.9	52.4	52.6	52.3	52.1	0.650579
138	846	D	11	3	25	27	100.06	112.46	96.6641	43	46.3	47.9	47.9	48.2	50.8	53.1	53.8	52.9	52.6	0.716668
138	846	D	11	3	33	35	100.14	112.54	96.7384	41.3	45	46.5	47	47.3	50.1	52.7	53.2	52.6	52.3	0.519859
138	846	D	11	3	41	43	100.22	112.62	96.8109	38.2	42.2	43.7	44.1	44.5	47.6	50.2	50.7	50.1	49.8	0.163024
138	846	D	11	3	49	51	100.3	112.7	96.879	37.3	40.9	42.2	42.3	42.4	45.2	47.8	48.3	47.9	47.1	0.057658
138	846	D	11	3	57	59	100.38	112.78	96.9439	37.1	40.8	42.2	42.3	42.4	45.6	48.2	48.5	48.3	48.1	0.0323043
138	846	D	11	3	65	67	100.46	112.86	97.0078	37.6	41.5	43.1	43.2	43.3	46.4	49.2	49.2	48.3	48.7	0.0869631
138	846	D	11	3	73	75	100.54	112.94	97.0718	35.5	39.3	40.5	40.4	40.5	43.6	46.2	46.3	45.9	46.1	-0.155568
138	846	D	11	3	81	83	100.62	113.02	97.1357	35.8	39	40.4	40.5	40.3	43	45.7	45.9	45.5	44.8	-0.123769
138	846	D	11	3	89	91	100.7	113.1	97.1997	38.5	42.3	43.4	43.3	43.1	45.7	48.1	48.4	47.7	47.2	0.182357
138	846	D	11	3	97	99	100.78	113.18	97.2636	37.7	40.2	41.2	40.9	40.6	43	45.6	45.9	45.6	45.5	0.0884215
138	846	D	11	3	105	107	100.86	113.26	97.3276	40.3	43.2	44.4	44.1	43.9	46.6	49	49.4	49.1	48.5	0.383118
138	846	D	11	3	113	115	100.94	113.34	97.3916	40.8	43.8	44.7	44.9	45.1	47.7	50.3	50.9	50.4	50.6	0.437777
138	846	D	11	3	121	123	101.02	113.42	97.4555	47.3	50.2	51	51	50.8	52.6	54.9	54.9	54.5	54	1.17826
138	846	D	11	3	129	131	101.1	113.5	97.5195	46.4	49.4	50.1	49.9	49.6	51.6	53.7	54.2	53.5	53.4	1.07289
138	846	D	11	3	137	139	101.18	113.58	97.5834	44.7	47.2	48.1	48.1	48.1	50.5	52.8	53.3	53.1	52.8	0.876082
138	846	D	11	3	145	147	101.26	113.66	97.6474	49.5	52.1	52.9	52.8	52.7	55.1	57	57.7	57.1	57.2	1.42225
138	846	D	11	4	1	3	101.32	113.72	97.6954	50.5	53.6	54.1	54	53.4	55.1	57.1	57.2	56.8	56	1.53468
138	846	D	11	4	9	11	101.4	113.8	97.7593	40.7	42.9	43.4	43.3	43	45.2	47.5	48.1	47.7	47.9	0.412012
138	846	D	11	4	17	19	101.48	113.88	97.8233	41.1	43.9	44.7	44.6	44.4	46.6	49	49.3	48.7	48.5	0.45524
138	846	D	11	4	25	27	101.56	113.96	97.8872	39.1	41.6	42.5	42.2	42.1	44.4	46.9	47.3	46.9	46.9	0.22414
138	846	D	11	4	33	35	101.64	114.04	97.9512	40.2	43.8	44.8	44.9	44.7	47.1	49.3	49.7	48.7	48.8	0.347381
138	846	D	11	4	41	43	101.72	114.12	98.0152	33.5	36.7	38.2	38.7	39.2	42.8	45.7	46.4	45.9	46.1	-0.420946
138	846	D	11	4	49	51	101.8	114.2	98.0799	33.6	37.1	38.4	39	39.4	43	45.8	46.4	46.1	45.7	-0.412009
138	846	D	11	4	57	59	101.88	114.28	98.1523	32.2	35.7	37.1	37.4	37.7	40.5	43.3	43.4	43.1	42.3	-0.574527
138	846	D	11	4	65	67	101.96	114.36	98.2271	28.3	32.2	34.1	34.8	36	41.4	45.5	46.6	46.6	47	-1.0228
138	846	D	11	4	73	75	102.04	114.44	98.3024	31.7	34.9	36.6	37.1	37.8	41.6	44.8	45.4	45.1	45.5	-0.636665
138	846	D	11	4	81	83	102.12	114.52	98.3776	33.9	37.2	38.6	39.2	39.6	43	45.8	46.5	46	46.1	-0.38769
138	846	D	11	4	89	91	102.2	114.6	98.4504	36.6	40.4	41.8	42.6	43.2	46.6	49.3	50.1	49.7	49.3	-0.081563
138	846	D	11	4	97	99	102.28	114.68	98.5203	34.8	38.3	40	40.3	40.9	44.1	47.1	47.2	47.3	45.9	-0.289803
138	846	D	11	4	105	107	102.36	114.76	98.5894	38	41.9	43.4	44.1	44.4	48.1	50.7	51.4	50.9	50.9	0.0734761
138	846	D	11	4	113	115	102.44	114.84	98.6571	37.2	40.7	42	42.4	42.7	45.9	48.6	49.1	48.6	49	-0.0204598
138	846	D	11	4	121	123	102.52	114.92	98.721	40.9	43.9	45.2	45.1	45.1	47.4	49.9	49.9	49.6	48.9	0.399971
138	846	D	11	4	129	131	102.6	115	98.785	40.1	43.8	45.4	45.3	45.5	48.6	51.4	51.5	51.3	50.3	0.306035
138	846	D	11	4	137	139	102.68	115.08	98.849	38.3	41.9	43.1	43.2	43.2	46.1	48.6	49.1	48.7	48.8	0.0977953
138	846	D	11	4	145	147	102.76	115.16	98.9128	43.2	46.3	47.6	47.3	47.2	49.5	52.2	52.2	52.2	50.9	0.65539
138	846	D	11	5	1	3	102.82	115.22	98.9605	39.3	42.4	43.7	43.7	43.5	46.3	48.7	49.5	48.8	48.4	0.207736
138	846	D	11	5	9	11	102.9	115.3	99.0235	43.5	47	47.8	47.5	46.8	48.5	50.6	50.9	50.2	49.9	0.685319
138	846	D	11	5	17	19	102.98	115.38	99.0865	37.3	41.2	42.6	42.7	42.7	45.6	48.2	48.7	48.1	47.9	-0.0258571
138	846	D	11	5	25	27	103.06	115.46	99.1494	37.7	41.4	43	43.2	43.4	46.3	48.9	49.5	48.7	48.6	0.0173714
138	846	D	11	5	33	35	103.14	115.54	99.212	37.2	40.5	41.6	41.9	41.9	44.8	47.3	48	47.5	47.4	-0.0422734
138	846	D	11	5	41	43	103.22	115.62	99.2737	37.1	40.1	41.5	41.8	42.2	45	47.7	48.2	48	47.8	-0.0561968
138	846	D	11	5	49	51	103.3	115.7	99.3354	36.2	39.3	40.9	41.2	41.8	44.9	47.9	48.3	48.6	47.6	-0.161563
138	846	D	11	5	57	59	103.38	115.78	99.3967	43	47	48.8	49.4	50.1	53.3	56.1	56.5	56.1	55.8	0.613209
138	846	D	11	5	65	67	103.46	115.86	99.4576	39	43.1	45.1	46.4	47.7	51.8	54.9	55.9	55.8	55.7	0.153501
138	846	D	11	5	73	75	103.54	115.94	99.5181	35.7	39.8	41.7	43.1	44.2	48.9	52	53.3	52.9	53.6	-0.226194
138	846	D	11	5	81	83	103.62	116.02	99.5785	35.8	39.8	42	43.6	45.3	50.5	54.1	55.4	55.6	56	-0.217256
138	846	D	11	5	89	91	103.7	116.1	99.638	34.1	38	40.3	41.8	43.5	48.5	52.1	53.4	53.7	54.1	-0.414066
138	846	D	11	5	97	99	103.78	116.18	99.6974	35	39.2	41.5	43.1	44.9	50.3	54	55.5	55.7	56	-0.313685
138	846	D	11	5	105	107	103.86	116.26	99.7558	32.1	35.8	38.2	39.6	41.5	47.5	51.6	53.2	53.9	54.2	-0.647659
138	846	D	11	5	113	115	103.94	116.34	99.8134	35.2	39.1	41.5	42.9	44.7	49.8	53.7	54.8	55.3	55.1	-0.295811
138	846	D	11	5	121	123	104.02	116.42	99.8711	36.7	40.3	42.6	43.7	45.3	49.5	53	53.8	54.3	53.9	-0.126848
138	846	D	11	5	129	131	104.1	116.5	99.929	36.8	40.9	43	44.5	46	50.8	54.1	55.3	55.4	55.7	-0.117911
138	846	D	11	5	137	139	104.18	116.58	99.9867	36.5	40.4	42.3	43.6	44.8	49	52.1	53.2	53.2	53.3	-0.154695
138	846	D	11	5	145	147	104.26	116.66	100.044	37.5	41.4	43.5	44.9	46.2	50.2	53.2	54	53.9	54	-0.0428841
138	846	D	11	6	1	3	104.32	116.72	100.087	34.5	38.3	40.5	42	43.5	48	51.5	52.4	52.6	52.9	-0.387665
138	846	D	11	6	9	11	104.4	116.8	100.145	31.2	34.9	37.1	38.5	39.9	44.9	48.6	49.6	49.8	50.3	-0.76736
138	846	D	11	6	17	19	104.48	116.88	100.203	28.7	32.2	34.1	35.4	36.7	41.2	44.7	45.5	45.4	45.6	-1.05561
138	846	D	11	6	25	27	104.56	116.96	100.261	31.1	34.6	36.5	37.2	37.8	41.6	44.7	45.1	44.6	45.3	-0.783776
138	846	D	11	6	33	35	104.64	117.04	100.319	31.3	34.5	36.4	36.9	37.5	41	43.9	44.5	43.8	44.5	-0.763409
138	846	D	11	6	41	43	104.72	117.12	100.378	33.4	36.5	37.8	37.9	37.9	40.6	43.3	43.7	43.2	43.2	-0.525864
138	846	D	11	6	49	51	104.8	117.2	100.437	34.3	37.5	38.7	38.8	38.7	41.6	44.1	44.8	44.2	44	-0.425484
138	846	D	11	6	57	59	104.88	117.28	100.496	39.2	42.7	43.9	44	44.1	46.7	49.3	49.8	49.1	49	0.132111
138	846	D	11	6	65	67	104.96	117.36	100.556	38.2	41.1	42	42	42	44.5	47	47.4	46.9	47	0.0153148
138	846	D	11	6	73	75	105.04	117.44	100.615	39.8	43.2	44.1	43.9	43.6	46	48.3	48.4	48.2	48.2	0.195708
138	846	D	11	6	81	83	105.12	117.52	100.675	38	40.5	40.9	40.7	40.2	42.5	44.8	45.3	44.9	45.1	-0.0125319
138	846	D	11	6	89	91	105.2	117.6	100.735	38.5	41.4	42.1	41.7	41.2	43.4	45.8	46.1	45.6	45.6	0.0421269
138	846	D	11	6	97	99	105.28	117.68	100.796	33.4	35.1	35.3	34.8	34.3	36.3	38.9	39.3	39.5	38.9	-0.543315
138	846	D	11	6	105	107	105.36	117.76	100.857	34.3	36.5	36.8	36.3	35.7	37.8	40.3	40.8	40.4	40.5	-0.442934
138	846	D	11	6	113	115	105.44	117.84	100.918	32.6	34.4	34.7	34.1	33.6	35.8	38.1	38.6	38.1	38.6	-0.639744
138	846	D	11	6	121	123	105.52	117.92	100.979	37.4	39.6	39.9	39.2	38.4	40.2	42.5	42.8	42.1	42.5	-0.0935791
138	846	D	11	6	129	131	105.6	118	101.039	40.8	43.3	43.9	43	42	43.4	45.6	45.7	45.1	44.5	0.29256
138	846	D	11	6	137	139	105.68	118.08	101.1	41.5	43.2	43.5	43.4	43.1	45	47.3	47.9	47.7	47.6	0.37008
138	846	D	11	6	145	147	105.76	118.16	101.16	46.8	50.1	50.4	49.9	48.8	50.2	52.1	52.3	51.5	50.9	0.973396
138	846	D	11	7	1	3	105.82	118.22	101.205	39.8	42.2	42.7	42.2	41.8	44.7	48	48.4	47.8	47.4	0.171401
138	846	D	11	7	9	11	105.9	118.3	101.266	43.1	46.2	47.1	46.8	46.6	48.8	51	51.7	50.8	50.5	0.54611
138	846	B	12	1	147	149	103.48	118.32	101.311	52.3	53.6	53.4	52.8	52.6	54.9	57.7	58.7	59.9	61.6	0.661208
138	846	D	11	7	17	19	105.98	118.38	101.356	43.1	45.3	45.8	45.6	45.1	47.1	49.3	49.7	49.3	49.2	0.543617
138	846	B	12	2	1	3	103.52	118.36	101.362	47.1	48.5	48.3	47.5	47	49.2	52	52.8	53.6	55.8	0.119483
138	846	B	12	2	5	7	103.56	118.4	101.416	51.1	53	53.2	52.4	52.1	54.9	57.8	58.8	59.5	61.7	0.535093
138	846	B	12	2	9	11	103.6	118.44	101.471	54.1	55.3	54.9	53.7	52.6	54.2	56.7	57.5	58.1	60	0.846647
138	846	B	12	2	13	15	103.64	118.48	101.527	54	54.9	54.4	53.3	52.3	54	56.4	57.2	57.7	59.7	0.835619
138	846	B	12	2	17	19	103.68	118.52	101.582	48.1	49.3	49.3	48.6	48.3	51	53.9	54.9	55.9	57.8	0.221052
138	846	B	12	2	21	23	103.72	118.56	101.636	48.1	48.5	48.3	47.5	47.1	49.6	52.4	53.6	54.8	57.1	0.22043
138	846	B	12	2	25	27	103.76	118.6	101.692	52.1	53.1	52.8	51.9	51.3	53.4	56.1	56.9	57.8	60	0.636041
138	846	B	12	2	29	31	103.8	118.64	101.747	51.4	52.3	52.3	51.7	51.2	53.7	56.2	57.2	58.1	59.9	0.562579
138	846	B	12	2	33	35	103.84	118.68	101.803	53.6	54.7	54.5	53.4	52.5	54.3	56.8	57.6	58.3	60.2	0.790884
138	846	B	12	2	37	39	103.88	118.72	101.858	50.6	51.3	50.8	49.9	49.2	51.2	53.9	54.7	55.3	57.5	0.478088
138	846	B	12	2	41	43	103.92	118.76	101.914	47.2	47.4	46.9	46.1	45.4	47.6	50.5	51.5	52.5	54.8	0.123668
138	846	B	12	2	45	47	103.96	118.8	101.969	49.4	49.8	49.3	48.3	47.4	49.5	52.1	52.9	53.7	56	0.351973
138	846	B	12	2	49	51	104	118.84	102.025	45.5	46.4	46.1	45.3	44.7	47.1	50	51	51.8	53.9	-0.0544768
138	846	B	12	2	53	55	104.04	118.88	102.08	46.9	47.4	47.2	46.4	45.8	48.2	51.1	52	52.9	55	0.0905831
138	846	B	12	2	57	59	104.08	118.92	102.136	51.6	52.3	52	51.2	50.5	52.6	55.3	56.3	56.9	59	0.579035
138	846	B	12	2	61	63	104.12	118.96	102.191	52.3	53.1	52.7	51.6	50.7	52.5	55.1	56	56.7	58.6	0.651254
138	846	B	12	2	65	67	104.16	119	102.247	53.6	54.5	53.9	52.4	51.1	52.7	55	55.6	56.4	58.5	0.785908
138	846	B	12	2	69	71	104.2	119.04	102.302	52.7	52.6	52.1	51.2	50.5	52.5	55.2	56.3	57.3	59.3	0.691633
138	846	B	12	2	73	75	104.24	119.08	102.358	57.2	57.7	57.5	56.7	56	58	60.4	61.4	62.3	64.5	1.15927
138	846	B	12	2	77	79	104.28	119.12	102.413	51.5	51.9	51.8	51.1	50.7	53.2	55.9	56.9	58.1	60.6	0.565519
138	846	B	12	2	81	83	104.32	119.16	102.469	55.5	56.5	56.6	56.1	55.8	58.2	60.9	62	63	65.1	0.98113
138	846	B	12	2	85	87	104.36	119.2	102.524	52.1	53.3	53.4	53	52.9	55.6	58.5	59.6	60.6	62.7	0.626709
138	846	B	12	2	89	91	104.4	119.24	102.58	58.1	59.2	59	58	57	58.6	61	61.8	62.4	64.4	1.25043
138	846	B	12	2	93	95	104.44	119.28	102.635	58.7	59.2	59.2	58.7	58.4	60.6	63.1	64.1	65	67.2	1.31225
138	846	B	12	2	97	99	104.48	119.32	102.69	53.1	53.4	52.8	51.7	50.9	52.7	55.2	56	56.7	58.6	0.728901
138	846	B	12	2	101	103	104.52	119.36	102.746	52.5	52.9	52.5	51.7	51.2	53.2	55.8	56.8	57.8	59.7	0.665844
138	846	B	12	2	105	107	104.56	119.4	102.801	51.9	52.1	51.7	50.9	50.2	52.3	55	56.1	57.1	59.3	0.602788
138	846	B	12	2	109	111	104.6	119.44	102.857	56.6	57.3	56.9	55.9	55	56.7	59.3	60.1	60.8	62.8	1.09124
138	846	B	12	2	113	115	104.64	119.48	102.911	50.6	51.8	52	51.7	51.6	54.9	57.9	59.2	60.1	62.4	0.466268
138	846	B	12	2	117	119	104.68	119.52	102.968	53.5	54.7	54.3	53.4	52.7	55.1	57.8	58.6	59.5	61.7	0.767414
138	846	B	12	2	121	123	104.72	119.56	103.022	52.5	53.3	53	52.1	51.4	53.5	56.2	57	57.9	60.2	0.662734
138	846	B	12	2	125	127	104.76	119.6	103.078	52.7	53.5	53.2	52.4	51.7	53.8	56.4	57.2	58.1	60	0.682923
138	846	B	12	2	129	131	104.8	119.64	103.133	49.7	50	50	49.2	48.9	51.1	54	55.1	56	58.5	0.370127
138	846	B	12	2	133	135	104.84	119.68	103.189	54.2	55.9	56	55.7	55.8	58.3	61.3	62.2	63.4	64.9	0.837766
138	846	B	12	2	137	139	104.88	119.72	103.244	48.7	49.4	49.5	49	48.7	51.2	54.2	55.1	56.2	58.4	0.264824
138	846	B	12	2	141	143	104.92	119.76	103.289	45.1	45.8	45.8	45.3	45.2	47.8	50.9	52	53.1	55.5	-0.110408
138	846	B	12	2	145	147	104.96	119.82	103.342	40.6	41.5	41.9	41.7	41.7	45.1	48.3	49.7	51	53.1	-0.579604
138	846	B	12	3	1	3	105.02	119.86	103.375	42.2	42.5	42.3	41.7	41.4	44.3	47.4	48.7	49.8	52.4	-0.413733
138	846	B	12	3	5	7	105.06	119.9	103.409	46.5	47.4	47.5	47	46.8	49.6	52.6	53.8	54.8	57.1	0.0330959
138	846	D	12	1	22	24	106.53	120.03	103.439	43.1	45.9	46.9	47	47.1	49.8	52.5	52.9	52.8	54.1	0.492199
138	846	B	12	3	9	11	105.1	119.94	103.442	48.9	49.6	49.8	49.5	49.4	52.2	55.3	56.4	57.4	59.9	0.282213
138	846	B	12	3	13	15	105.14	119.98	103.475	47.8	48.5	48.5	47.9	47.5	49.9	52.7	53.8	54.6	57	0.167128
138	846	D	12	1	30	32	106.61	120.11	103.508	41.2	43.8	45	45.3	45.4	48.1	50.9	51.5	51.3	51.7	0.272529
138	846	D	12	1	38	40	106.69	120.19	103.577	45.9	48.6	49.5	49.3	49.1	51.2	53.6	54.1	54	54.1	0.807264
138	846	D	12	1	46	48	106.77	120.27	103.647	44.4	47.6	48.6	48.5	48.4	50.7	53.2	53.6	53.6	53.9	0.633315
138	846	D	12	1	54	56	106.85	120.35	103.716	41.3	44.3	45.4	45.5	45.6	48.2	50.8	51.4	51.4	51.8	0.276481
138	846	D	12	1	62	64	106.93	120.43	103.786	42.8	45.7	46.6	46.6	46.5	48.8	51.1	51.6	51.3	51.8	0.445443
138	846	D	12	1	70	72	107.01	120.51	103.854	41.3	44.2	45.5	45.7	46.1	48.9	51.6	52.3	52.1	52.9	0.271495
138	846	D	12	1	78	80	107.09	120.59	103.924	43.3	46.4	47.5	47.9	48	50.8	53.3	54	53.8	54.6	0.497609
138	846	D	12	1	86	88	107.17	120.67	103.993	40.3	42.9	44.2	44.3	44.6	47.6	50.2	50.9	51	51.8	0.152205
138	846	D	12	1	94	96	107.25	120.75	104.063	42	45.3	46.5	46.6	46.7	49.1	51.8	52.5	52.1	51.9	0.344028
138	846	D	12	1	102	104	107.33	120.83	104.133	41.4	44.4	45.4	45.4	45.4	48	50.6	51.2	51.1	51.3	0.272953
138	846	D	12	1	110	112	107.41	120.91	104.201	41.1	44.4	45.7	45.6	45.7	48.2	50.9	51.4	51.1	51.5	0.236169
138	846	D	12	1	118	120	107.49	120.99	104.272	39.3	42.4	43.5	43.5	43.5	46.2	48.8	49.3	49.3	49.8	0.0279295
138	846	D	12	1	126	128	107.57	121.07	104.345	39.9	42.9	44	44	43.8	46.3	48.9	49.5	49.3	49.5	0.0940187
138	846	D	12	1	134	136	107.65	121.15	104.42	38.5	41.2	42.1	41.8	41.6	43.9	46.4	46.8	46.6	46.9	-0.0684994
138	846	D	12	1	142	144	107.73	121.23	104.495	34.3	37.2	38.2	38.1	37.9	40.6	43.5	44.1	44	44.7	-0.551068
138	846	D	12	2	1	3	107.82	121.32	104.579	38	40.3	40.7	40	39.3	41.3	43.8	44.1	44.2	44.6	-0.130949
138	846	D	12	2	5	7	107.86	121.36	104.618	38.8	41.5	42	41.5	40.9	43	45.5	45.9	45.6	45.9	-0.0407524
138	846	D	12	2	9	11	107.9	121.4	104.656	41	43.3	43.6	42.8	42	43.9	46.4	46.7	46.4	47.1	0.209469
138	846	D	12	2	13	15	107.94	121.44	104.694	44.1	46.7	47.2	46.3	45.6	47.4	49.7	50	49.9	49.9	0.562564
138	846	D	12	2	17	19	107.98	121.48	104.733	45.4	47.9	48.4	47.8	47.2	49.1	51.4	51.8	51.6	51.8	0.709912
138	846	D	12	2	21	23	108.02	121.52	104.772	43.4	46.4	47	46.5	46.1	48.1	50.6	51	50.8	50.7	0.480059
138	846	D	12	2	25	27	108.06	121.56	104.81	41.6	44.2	45	44.9	44.7	47.5	50	50.7	50.6	50.9	0.273065
138	846	D	12	2	29	31	108.1	121.6	104.849	46	48.6	49.7	49.6	49.6	52.2	54.6	55.1	55.3	56	0.774755
138	846	D	12	2	33	35	108.14	121.64	104.887	43.2	45.7	46.4	46.1	45.8	48.1	50.4	51.2	50.7	51.2	0.453458
138	846	D	12	2	37	39	108.18	121.68	104.926	39.2	41.6	42.5	42.2	42.2	45	47.6	48.2	48.3	48.7	-0.00500285
138	846	D	12	2	41	43	108.22	121.72	104.964	46.8	49.3	50	49.4	48.8	50.7	53	53.2	52.7	53.6	0.862459
138	846	D	12	2	45	47	108.26	121.76	105.003	45.6	48.2	48.8	48.4	48	50	52.3	52.6	52.4	52.7	0.724048
138	846	D	12	2	49	51	108.3	121.8	105.041	42.4	45.6	46.4	46.4	46.6	49.1	51.8	52.2	52.1	52.8	0.357029
138	846	D	12	2	53	55	108.34	121.84	105.079	43.1	45.8	46.2	45.7	45.1	47	49.4	49.8	49.4	50	0.435795
138	846	D	12	2	57	59	108.38	121.88	105.114	39.8	42.7	43.6	43.4	43	45	47.6	48.1	48.1	48.3	0.0573469
138	846	D	12	2	61	63	108.42	121.92	105.15	41.7	44.7	45.5	45	44.5	46.6	49.1	49.6	49.3	49.5	0.273277
138	846	D	12	2	65	67	108.46	121.96	105.182	42	44.7	45.3	44.8	44.3	46.4	48.8	49.3	49	49.4	0.306322
138	846	D	12	2	69	71	108.5	122	105.214	37.7	39.8	40.2	39.7	39.3	41.5	44.1	44.5	44.7	45	-0.18643
138	846	D	12	2	73	75	108.54	122.04	105.246	41.6	44.5	45.1	44.5	43.8	45.9	48.4	48.9	49	49.8	0.258107
138	846	D	12	2	77	79	108.58	122.08	105.278	39.5	41.7	42	41.3	40.6	42.6	45	45.5	45.7	46.5	0.0168233
138	846	D	12	2	81	83	108.62	122.12	105.31	37.6	39.5	39.7	38.9	38.2	40.2	42.7	43.2	43.1	44	-0.2016
138	846	D	12	2	85	87	108.66	122.16	105.342	37.2	39.5	39.8	38.9	38.1	39.9	42.4	42.8	42.8	43.7	-0.248568
138	846	D	12	2	89	91	108.7	122.2	105.374	32.5	34.2	34.4	33.5	32.8	34.8	37.4	37.9	37.9	38.5	-0.787042
138	846	D	12	2	93	95	108.74	122.24	105.406	36.2	38.5	39	38.4	37.8	40	42.6	43.1	43.3	44	-0.365365
138	846	D	12	2	97	99	108.78	122.28	105.438	30.6	31.9	32	31.3	30.7	33	35.8	36.4	36.5	37.5	-1.00671
138	846	D	12	2	101	103	108.82	122.32	105.47	29.5	31	31.3	30.8	30.4	32.9	35.7	36.4	36.4	37.2	-1.13369
138	846	D	12	2	105	107	108.86	122.36	105.502	31	32.4	32.5	31.9	31.4	33.7	36.5	36.9	37.1	38.1	-0.963483
138	846	D	12	2	109	111	108.9	122.4	105.534	31.4	33.3	33.8	33.4	32.9	35.3	38.1	38.7	38.9	39.6	-0.919008
138	846	D	12	2	113	115	108.94	122.44	105.566	33.9	35.7	36	35.5	35	37.5	40.3	40.7	40.5	41.4	-0.634496
138	846	D	12	2	117	119	108.98	122.48	105.598	42	45.2	46.1	45.8	45.6	47.9	50.5	50.8	50.5	50.9	0.290118
138	846	D	12	2	121	123	109.02	122.52	105.63	43.6	47	48.2	48.2	48.1	50.7	53.3	53.8	53.5	54.4	0.471757
138	846	D	12	2	125	127	109.06	122.56	105.662	43.1	45.9	46.7	46.4	46	48.3	50.8	51.5	51.5	51.6	0.413359
138	846	D	12	2	133	135	109.14	122.64	105.727	45.9	49.1	50.2	50	50	52.2	54.9	55.1	55.1	55.2	0.730916
138	846	D	12	2	137	139	109.18	122.68	105.761	48.8	51.7	52.6	52.2	51.5	53.6	55.6	55.7	55.7	55.4	1.06115
138	846	D	12	2	141	143	109.22	122.72	105.795	48	50.4	51.1	50.7	49.9	51.8	54.1	54.4	53.8	54	0.968461
138	846	D	12	2	145	147	109.26	122.76	105.833	43.5	45.5	45.5	44.7	44.2	45.9	48.1	48.7	48.5	48.6	0.452848
138	846	D	12	3	1	3	109.32	122.82	105.889	32.3	33.9	34.2	33.9	33.5	35.8	38.5	39.1	39.8	40.4	-0.829223
138	846	D	12	3	5	7	109.36	122.86	105.926	33.1	35.4	36	35.3	34.7	37	39.8	40.2	40.3	40.5	-0.739027
138	846	D	12	3	9	11	109.4	122.9	105.964	34.2	36.4	36.8	36	35.4	37.6	40.4	40.9	40.5	41.6	-0.614539
138	846	D	12	3	13	15	109.44	122.94	106.001	36.5	38.9	39.2	38.4	37.6	39.7	42.1	42.7	42.4	42.8	-0.352887
138	846	D	12	3	17	19	109.48	122.98	106.039	37.4	39.8	40.1	39.4	38.8	40.9	43.4	44.2	43.6	44.5	-0.25126
138	846	D	12	3	21	23	109.52	123.02	106.076	37.7	39.9	40	39.3	38.6	40.3	42.8	43.3	42.9	43.6	-0.218216
138	846	D	12	3	25	27	109.56	123.06	106.112	35	37.1	37.4	36.8	36.2	38.3	40.9	41.5	41	41.9	-0.528082
138	846	D	12	3	29	31	109.6	123.1	106.148	36.2	38.5	38.7	37.6	36.8	38.7	41	41.4	41.1	41.7	-0.392164
138	846	D	12	3	33	35	109.64	123.14	106.182	31.2	33.3	33.5	32.6	31.9	33.9	36.8	37.1	37	37.6	-0.964929
138	846	D	12	3	37	39	109.68	123.18	106.215	30.4	32.5	32.7	31.9	31.2	33.6	36.2	36.7	36.9	37	-1.05762
138	846	D	12	3	41	43	109.72	123.22	106.248	29.4	31.3	31.8	31.2	30.8	33.6	36.6	37	37.5	38	-1.17317
138	846	D	12	3	45	47	109.76	123.26	106.28	30.3	32.3	32.3	31.3	30.8	33.1	35.9	36.3	36.4	36.8	-1.07154
138	846	D	12	3	49	51	109.8	123.3	106.312	29.3	31.7	31.6	30.7	30	32	34.8	35.2	35.2	35.5	-1.18709
138	846	D	12	3	53	55	109.84	123.34	106.344	28.1	30	30.3	29.7	29.3	31.9	35	35.4	35.8	36.6	-1.3255
138	846	D	12	3	57	59	109.88	123.38	106.376	29.5	31.3	31.6	31.1	30.6	33.1	36	36.7	36.7	37.7	-1.16672
138	846	D	12	3	61	63	109.92	123.42	106.408	31.8	33.8	33.9	33	32.2	34.3	37.1	37.5	37.4	38.5	-0.905072
138	846	D	12	3	65	67	109.96	123.46	106.44	33.6	35.7	35.6	34.6	33.6	35.6	38.2	38.5	38.6	38.9	-0.700572
138	846	D	12	3	69	71	110	123.5	106.472	34.2	35.9	36.3	35.5	35	37.2	39.8	40.6	40.3	41.2	-0.633237
138	846	D	12	3	73	75	110.04	123.54	106.505	35.5	37.7	38.1	37.6	37.5	39.9	42.7	43.3	43.4	44.3	-0.485888
138	846	D	12	3	77	79	110.08	123.58	106.54	37.4	39.8	40.2	39.7	39.2	41.5	44.2	44.7	44.7	45.1	-0.269958
138	846	D	12	3	81	83	110.12	123.62	106.574	38.8	41.8	42.2	41.7	41.4	43.7	46.3	46.8	46.6	47.2	-0.111179
138	846	D	12	3	85	87	110.16	123.66	106.612	34.3	36.2	36.4	35.8	35.3	37.4	40	40.7	40.5	40.9	-0.626792
138	846	D	12	3	89	91	110.2	123.7	106.649	37.6	39.7	39.7	38.8	38	39.8	42.3	42.7	42.6	43.1	-0.250837
138	846	D	12	3	93	95	110.24	123.74	106.687	42.6	45.1	45.2	44.1	43.1	44.5	46.8	47.2	46.9	47	0.319435
138	846	D	12	3	97	99	110.28	123.78	106.725	40.6	42.9	43	41.9	40.9	42.5	44.9	45.3	45.2	45.7	0.0895814
138	846	D	12	3	101	103	110.32	123.82	106.762	38.4	39.6	39.5	38.6	37.7	39.5	42	42.6	42.7	43.4	-0.163133
138	846	D	12	3	105	107	110.36	123.86	106.8	36.8	38.1	37.8	36.8	35.8	37.5	40	40.5	40.6	41.4	-0.347266
138	846	D	12	3	109	111	110.4	123.9	106.837	37.8	39.4	39.3	38.3	37.4	39.2	41.7	42.3	42.4	42.8	-0.234208
138	846	D	12	3	113	115	110.44	123.94	106.875	34.8	36.6	36.6	35.7	34.9	36.9	39.4	40	40.1	40.8	-0.578366
138	846	D	12	3	117	119	110.48	123.98	106.912	34.4	36.4	36.4	35.5	34.8	36.8	39.4	39.8	39.8	40.2	-0.625334
138	846	D	12	3	121	123	110.52	124.02	106.95	40.1	42.6	42.2	40.5	38.6	39.7	41.9	42	41.7	42.3	0.0249506
138	846	D	12	3	125	127	110.56	124.06	106.987	37	39	39.2	38.3	37.5	39.5	42.1	42.6	42.6	43.1	-0.330637
138	846	D	12	3	129	131	110.6	124.1	107.025	36	37.7	37.6	36.6	35.6	37.2	39.8	40.4	40.4	40.8	-0.446187
138	846	D	12	3	133	135	110.64	124.14	107.062	34.2	35.7	35.8	35	34.3	36.5	39.2	39.9	40	40.8	-0.653181
138	846	D	12	3	137	139	110.68	124.18	107.1	37.6	39	39	38.1	37.2	39.1	41.6	42.2	42.4	43	-0.265795
138	846	D	12	3	141	143	110.72	124.22	107.137	37.8	39.6	39.9	39.1	38.5	40.5	43	43.7	43.6	44.6	-0.24418
138	846	D	12	3	145	147	110.76	124.26	107.175	39.6	42.1	42.4	41.8	41.2	43.2	45.7	46.2	46	46.7	-0.0396802
138	846	D	12	4	1	3	110.82	124.32	107.231	43.9	46.5	47	46.2	45.4	46.9	49.3	49.8	49.5	50	0.449956
138	846	D	12	4	5	7	110.86	124.36	107.269	37.6	39	39.1	38.6	38.1	40.2	42.8	43.5	43.6	44.3	-0.271404
138	846	D	12	4	9	11	110.9	124.4	107.306	37.9	39.5	39.8	39.3	38.8	41	43.7	44.4	44.5	45.4	-0.238359
138	846	D	12	4	13	15	110.94	124.44	107.344	36.7	38.4	38.5	38	37.6	39.7	42.3	43.2	43.3	44.3	-0.37677
138	846	D	12	4	17	19	110.98	124.48	107.381	38	39.6	39.8	39.3	38.8	40.8	43.3	43.9	44.1	44.9	-0.229422
138	846	D	12	4	21	23	111.02	124.52	107.419	32.8	34.5	35.1	34.9	34.9	37.6	40.6	41.6	42	43.4	-0.825047
138	846	D	12	4	25	27	111.06	124.56	107.457	35.1	36.7	37.1	36.8	36.8	39.1	42	42.8	43.5	44.2	-0.563395
138	846	D	12	4	29	31	111.1	124.6	107.494	41.3	44.1	44.7	44.2	43.7	45.8	48.3	48.8	48.8	49.2	0.144041
138	846	D	12	4	33	35	111.14	124.64	107.531	41.5	43.8	44.1	43.4	42.7	44.6	47.1	47.6	47.5	48	0.165655
138	846	D	12	4	37	39	111.18	124.68	107.565	41.1	43.7	44.2	43.6	42.9	44.8	47.3	47.8	47.5	48.2	0.118687
138	846	D	12	4	41	43	111.22	124.72	107.6	42.2	43.8	43.9	43	42.1	43.6	46	46.5	46.4	47	0.243175
138	846	D	12	4	45	47	111.26	124.76	107.633	40.7	43	43.3	42.3	41.3	42.9	45.3	45.8	45.5	46.1	0.0704726
138	846	D	12	4	49	51	111.3	124.8	107.665	42.5	45.3	45.6	44.6	43.6	45.1	47.5	48	47.6	48.2	0.274973
138	846	D	12	4	53	55	111.34	124.84	107.697	41.5	43.3	43.3	42.3	41.2	42.6	44.9	45.3	45.1	45.7	0.159423
138	846	D	12	4	57	59	111.38	124.88	107.729	38.1	39.4	39.5	38.8	38.2	40	42.5	43.2	43.2	44.1	-0.230456
138	846	D	12	4	61	63	111.42	124.92	107.761	37.5	39.1	39.3	38.8	38.3	40.3	42.9	43.4	43.5	44.1	-0.300285
138	846	D	12	4	65	67	111.46	124.96	107.793	35	37.2	37.8	37.6	37.3	39.9	42.9	43.5	43.6	44.5	-0.587291
138	846	D	12	4	69	71	111.5	125	107.825	34.6	36.4	36.8	36.4	36.1	38.5	41.3	42.1	42.3	43.1	-0.634259
138	846	D	12	4	73	75	111.54	125.04	107.857	36.5	39.1	39.7	39.4	39.2	41.7	44.4	45	45.1	45.6	-0.418328
138	846	D	12	4	77	79	111.58	125.08	107.888	34.3	37	37.8	37.6	37.6	40.6	43.6	44.3	44.3	45.2	-0.671043
138	846	D	12	4	81	83	111.62	125.12	107.92	37.8	40.3	41	40.9	40.8	43.4	46.2	46.9	47.1	47.7	-0.272226
138	846	D	12	4	85	87	111.66	125.16	107.952	40.4	42.6	43.2	42.8	42.2	44.3	46.8	47.2	47.2	47.8	0.0237166
138	846	D	12	4	89	91	111.7	125.2	107.983	41.9	44.5	45.2	45	44.8	47	49.7	50.2	50.3	50.9	0.193926
138	846	D	12	4	93	95	111.74	125.24	108.015	40.6	42.9	43.7	43.7	43.8	46.6	49.3	50.1	50.4	51.1	0.0440843
138	846	D	12	4	97	99	111.78	125.28	108.046	41.4	44.1	45.2	45.4	45.6	48.5	51.2	52	52.4	52.9	0.134281
138	846	D	12	4	101	103	111.82	125.32	108.078	42.1	44.8	45.9	46.1	46.4	49.3	52	52.7	53	53.8	0.213047
138	846	D	12	4	105	107	111.86	125.36	108.109	46.9	49.5	50.4	50.5	50.5	52.8	55.3	55.8	55.9	56.7	0.760458
138	846	D	12	4	109	111	111.9	125.4	108.141	45.4	48.1	49.1	49.2	49.3	51.8	54.4	54.9	55.2	55.9	0.587756
138	846	D	12	4	113	115	111.94	125.44	108.172	48.8	51.4	52.4	52.4	52.5	54.9	57.4	57.9	57.9	58.8	0.975142
138	846	D	12	4	117	119	111.98	125.48	108.203	50.4	53	54	54.1	54.2	56.8	59.3	59.9	60.1	60.9	1.15678
138	846	D	12	4	121	123	112.02	125.52	108.235	47.3	50.4	51.5	51.5	51.6	54	56.6	57.1	57.1	57.4	0.801193
138	846	D	12	4	125	127	112.06	125.56	108.266	41	43.7	44.6	44.7	44.8	47.7	50.4	51.1	51.3	52	0.0798339
138	846	D	12	4	129	131	112.1	125.6	108.298	44.5	47.5	48.3	47.9	47.6	49.7	52.1	52.5	52.5	52.8	0.47865
138	846	D	12	4	133	135	112.14	125.64	108.329	40	42.9	44	44	44.3	47.1	50	50.9	51	51.5	-0.0369628
138	846	D	12	4	137	139	112.18	125.68	108.36	41.4	44.3	45	44.7	44.4	46.6	49.1	49.6	49.6	50.3	0.121816
138	846	D	12	4	141	143	112.22	125.72	108.392	36.2	38.8	39.6	39.5	39.6	42.4	45.3	45.9	45.9	46.7	-0.47381
138	846	D	12	4	145	147	112.26	125.76	108.423	28.9	31.6	32.7	33.1	33.9	38.6	42.6	43.9	44.7	45.7	-1.30947
138	846	D	12	5	1	3	112.32	125.82	108.47	30.5	32.7	33.3	33.1	32.9	35.7	38.7	39.4	39.7	40.5	-1.12846
138	846	D	12	5	5	7	112.36	125.86	108.502	34.7	37.1	37.7	37.3	36.8	39.2	41.9	42.5	42.5	43.3	-0.649628
138	846	D	12	5	9	11	112.4	125.9	108.533	33.5	36.1	36.8	36.5	36.2	38.8	41.6	42	42.2	42.8	-0.788039
138	846	D	12	5	13	15	112.44	125.94	108.565	31.6	34.1	34.9	34.7	34.6	37.4	40.2	40.9	40.9	41.9	-1.00646
138	846	D	12	5	17	19	112.48	125.98	108.596	29.8	32.3	33.3	33.2	33	35.8	38.9	39.6	39.7	40.4	-1.21346
138	846	D	12	5	21	23	112.52	126.02	108.628	29.5	32.1	32.9	32.7	32.4	35.2	38.2	38.8	39	39.8	-1.24899
138	846	D	12	5	25	27	112.56	126.06	108.66	30	32.4	33	32.6	32.2	34.7	37.6	38.1	38.1	38.6	-1.19309
138	846	D	12	5	29	31	112.6	126.1	108.691	30.5	33	33.5	33	32.5	34.8	37.7	38.2	38.1	38.8	-1.13718
138	846	D	12	5	33	35	112.64	126.14	108.723	31.9	34.3	34.8	34.3	33.8	36.1	38.9	39.5	39.5	40.1	-0.978404
138	846	D	12	5	37	39	112.68	126.18	108.754	32.7	35.1	35.6	34.9	34.3	36.6	39.3	39.8	40	40.5	-0.888207
138	846	D	12	5	41	43	112.72	126.22	108.786	34	36.3	36.8	36.1	35.5	37.7	40.4	40.8	40.8	41.6	-0.740859
138	846	D	12	5	45	47	112.76	126.26	108.818	38.5	41	41.5	41	40.3	42.5	45.2	45.6	45.4	46.3	-0.227739
138	846	D	12	5	49	51	112.8	126.3	108.849	42.9	45.2	45.6	45	44.4	46.2	48.6	49.1	48.8	49.5	0.273951
138	846	D	12	5	53	55	112.84	126.34	108.882	45.7	48.2	48.6	48	47.2	48.8	51	51.3	51.1	51.7	0.592754
138	846	D	12	5	57	59	112.88	126.38	108.917	39	42.1	43	42.8	42.6	45	47.7	48.2	48	48.5	-0.174327
138	846	D	12	5	61	63	112.92	126.42	108.952	41.1	44.1	44.9	44.4	43.9	45.8	48.2	48.7	48.4	48.9	0.0644646
138	846	D	12	5	65	67	112.96	126.46	108.99	36.5	39	39.9	39.6	39.4	42	44.9	45.5	45.4	46.2	-0.462579
138	846	D	12	5	69	71	113	126.5	109.027	41.9	44.4	44.6	43.6	42.3	43.8	46.1	46.4	46.3	46.6	0.153415
138	846	D	12	5	73	75	113.04	126.54	109.065	41.1	43.2	43.4	42.3	41	42.3	44.6	45.1	44.8	45.2	0.0607251
138	846	D	12	5	77	79	113.08	126.58	109.103	36.4	38.6	38.6	37.8	36.8	38.6	41	41.7	41.5	42.2	-0.477749
138	846	D	12	5	81	83	113.12	126.62	109.141	34.6	36.9	37.3	36.7	36	38.4	41.1	41.7	41.6	42.8	-0.684742
138	846	D	12	5	85	87	113.16	126.66	109.178	35	37	37.2	36.2	35.3	37.1	39.6	40.1	39.9	40.6	-0.640267
138	846	D	12	5	89	91	113.2	126.7	109.216	35	37.5	37.8	37.2	36.3	38.2	40.8	41.3	41.1	41.9	-0.641513
138	846	D	12	5	93	95	113.24	126.74	109.254	35.7	38.3	38.8	38.2	37.6	39.7	42.3	42.9	42.8	43.3	-0.562747
138	846	D	12	5	97	99	113.28	126.78	109.291	35.7	38.2	38.7	38	37.4	39.4	42	42.5	42.4	43	-0.563994
138	846	D	12	5	101	103	113.32	126.82	109.329	34.4	37.5	38.3	37.8	37.5	39.9	42.7	43.3	43.1	43.7	-0.713835
138	846	D	12	5	105	107	113.36	126.86	109.366	32.4	34.8	35.4	34.8	34.3	36.6	39.4	39.9	40	40.7	-0.943689
138	846	D	12	5	109	111	113.4	126.9	109.403	33.1	35.4	35.9	35.6	35.2	37.5	40.3	40.9	40.9	41.8	-0.864923
138	846	D	12	5	113	115	113.44	126.94	109.441	33.7	36.6	37.4	37.1	36.9	39.4	42.2	42.8	42.8	43.8	-0.797587
138	846	D	12	5	117	119	113.48	126.98	109.478	35.2	37.3	37.8	37.4	36.8	39	41.7	42.3	42.2	42.9	-0.627378
138	846	D	12	5	121	123	113.52	127.02	109.516	36.6	39.2	40	39.6	39.3	41.6	44.3	44.8	44.8	45.5	-0.468599
138	846	D	12	5	125	127	113.56	127.06	109.553	34.8	37.6	38.5	38.3	38.1	40.8	43.6	44.1	44	44.8	-0.675592
138	846	D	12	5	129	131	113.6	127.1	109.591	34.2	36.7	37.3	36.9	36.5	39	41.8	42.3	42.3	43.1	-0.745421
138	846	D	12	5	133	135	113.64	127.14	109.629	35.6	38.6	39.2	38.6	38.1	40.4	43.1	43.5	43.3	43.7	-0.586642
138	846	D	12	6	1	3	113.82	127.32	109.798	32.3	34.2	34.6	34	33.5	35.9	38.7	39.2	39.4	40.1	-0.969454
138	846	D	12	6	5	7	113.86	127.36	109.835	33.7	36	36.4	35.9	35.5	38	40.8	41.5	41.6	42.3	-0.810675
138	846	D	12	6	9	11	113.9	127.4	109.873	32.2	34.4	34.7	34.2	33.8	36.3	39.1	39.7	39.9	40.8	-0.983377
138	846	D	12	6	13	15	113.94	127.44	109.91	34.4	36.1	36.2	35.4	34.8	36.8	39.5	40.3	40.3	41	-0.733156
138	846	D	12	6	17	19	113.98	127.48	109.948	37.3	39.1	39	37.9	36.8	38.4	41	41.5	41.4	42	-0.402921
138	846	D	12	6	21	23	114.02	127.52	109.985	35	37.2	37.3	36.4	35.6	37.5	40.2	40.8	40.6	41.5	-0.667066
138	846	D	12	6	25	27	114.06	127.56	110.023	36.8	38.2	38.1	37.1	36.1	37.9	40.4	41	41.1	41.7	-0.462566
138	846	D	12	6	29	31	114.1	127.6	110.06	31.3	32.7	33	32.6	32.4	35.3	38.3	39.3	39.7	40.6	-1.09248
138	846	D	12	6	33	35	114.14	127.64	110.098	38.7	40.9	41.5	41.1	40.8	43.2	45.9	46.6	46.9	47.8	-0.247882
138	846	D	12	6	37	39	114.18	127.68	110.135	39	40.7	40.9	40.5	40	42.1	44.8	45.4	45.7	46.8	-0.214838
138	846	D	12	6	41	43	114.22	127.72	110.173	41.1	42.9	43.2	42.5	42	44	46.5	47	47.2	47.8	0.0239536
138	846	D	12	6	45	47	114.26	127.76	110.21	39.9	40.8	40.6	39.6	38.8	40.6	43	43.6	43.8	44.6	-0.114457
138	846	D	12	6	49	51	114.3	127.8	110.248	37	37.9	37.8	37.1	36.5	38.5	41.2	42	42.4	43.4	-0.447184
138	846	D	12	6	53	55	114.34	127.84	110.285	43.2	45.6	45.6	44.4	43.2	44.7	47	47.3	47.3	48	0.260252
138	846	D	12	6	57	59	114.38	127.88	110.323	43	44.8	44.9	44.1	43.3	45.1	47.6	48.1	48.1	48.5	0.236145
138	846	D	12	6	61	63	114.42	127.92	110.36	47.6	50.3	50.5	49.4	48.1	49.4	51.5	51.7	51.3	51.8	0.760695
138	846	D	12	6	65	67	114.46	127.96	110.398	44.6	46.4	46.6	45.8	45.1	46.8	49.2	49.8	49.9	50.8	0.416537
138	846	D	12	6	69	71	114.5	128	110.435	44.1	46.5	46.9	46.2	45.5	47.3	49.7	50.2	50.3	51.1	0.358139
138	846	D	12	6	73	75	114.54	128.04	110.473	43	45.5	45.8	45.2	44.5	46.3	48.7	49.2	49.2	50	0.231159
138	846	D	12	6	77	79	114.58	128.08	110.51	43.2	45.9	46.4	45.9	45.4	47.3	49.8	50.2	50.2	50.9	0.252773
138	846	D	12	6	81	83	114.62	128.12	110.548	43.8	46.5	47.1	46.8	46.5	48.5	50.9	51.4	51.5	52.4	0.320109
138	846	D	12	6	85	87	114.66	128.16	110.585	47.3	50.7	51.7	51.6	51.7	53.9	56.4	57	56.8	57.3	0.718925
138	846	D	12	6	89	91	114.7	128.2	110.623	45.4	47.9	48.5	48.4	48.2	50.3	52.7	53.1	53.2	53.6	0.500501
138	846	D	12	6	93	95	114.74	128.24	110.66	48.1	51	51.6	51.2	50.8	52.5	54.9	55.3	55.2	55.5	0.807875
138	846	D	12	6	97	99	114.78	128.28	110.698	48.3	50.5	50.9	50.6	50.4	52.3	54.7	55.3	55.5	56.1	0.829489
138	846	D	12	6	101	103	114.82	128.32	110.736	46.5	49.2	50	50	50	52.3	54.9	55.6	55.7	56.6	0.622496
138	846	D	12	6	105	107	114.86	128.36	110.773	46.6	49.1	49.8	49.8	49.8	52.1	54.6	55.3	55.6	56.2	0.63268
138	846	D	12	6	109	111	114.9	128.4	110.811	42.7	44.9	45.6	45.5	45.5	48.1	50.9	51.7	52.1	52.9	0.185649
138	846	D	12	6	113	115	114.94	128.44	110.847	39.9	41.5	41.8	41.6	41.5	43.9	46.6	47.4	48	48.9	-0.135648
138	846	D	12	6	117	119	114.98	128.48	110.883	43.4	45.2	45.6	45.4	45	47.1	49.7	50.3	50.5	51.3	0.263169
138	846	D	12	6	121	123	115.02	128.52	110.918	42.1	44.2	44.8	44.6	44.5	46.6	49.2	50.1	50.3	50.9	0.113327
138	846	D	12	6	125	127	115.06	128.56	110.95	37.5	39.9	40.8	40.7	40.9	43.5	46.3	47.2	47.6	48.4	-0.413716
138	846	D	12	6	129	131	115.1	128.6	110.982	40.7	43.9	44.8	44.9	45	47.6	50.5	51.4	51.5	52.1	-0.0491907
138	846	D	12	6	133	135	115.14	128.64	111.014	39.4	41.8	42.6	42.6	42.7	45.3	48.2	49.1	49.5	50.4	-0.199032
138	846	D	12	6	137	139	115.18	128.68	111.046	44.1	46.8	47.6	47.2	46.9	48.8	51.3	51.9	51.8	52.7	0.336949
138	846	D	12	6	141	143	115.22	128.72	111.078	39.4	42.3	43.4	43.6	43.9	46.9	50	50.9	51.3	52.4	-0.201525
138	846	D	12	6	145	147	115.26	128.76	111.11	30.9	33.5	34.9	35.4	36.4	40.6	44.3	45.8	46.6	48.1	-1.17435
138	846	D	12	7	1	3	115.32	128.82	111.158	36.7	38.7	39.4	39.3	39.5	42.3	45.5	46.4	46.8	47.9	-0.513261
138	846	D	12	7	5	7	115.36	128.86	111.19	38.3	40.6	41.3	41.1	41.2	43.7	46.6	47.4	47.7	48.6	-0.331622
138	846	D	12	7	9	11	115.4	128.9	111.222	35.1	36.8	37.4	37.5	37.7	40.4	43.4	44.4	44.8	46	-0.69864
138	846	D	12	7	13	15	115.44	128.94	111.254	38.9	41.4	42	42.1	42.3	44.8	47.7	48.5	48.7	49.6	-0.265533
138	846	D	12	7	17	19	115.48	128.98	111.285	36.6	38.6	39.3	39.3	39.4	41.9	44.8	45.7	46	47.3	-0.529677
138	846	D	12	7	21	23	115.52	129.02	111.317	38.3	41.2	42	42.1	42.3	44.8	47.7	48.4	48.7	49.6	-0.336608
138	846	D	12	7	25	27	115.56	129.06	111.348	38.4	41.4	42.4	42.6	42.8	45.4	48.3	49.1	49.4	50	-0.326424
138	846	D	12	7	29	31	115.6	129.1	111.38	36.5	39.9	41.1	41.5	42	45.2	48.3	49.2	49.5	50.5	-0.544847
138	846	B	13	1	137	139	112.88	129.33	111.388	44	45	45.2	44.8	44.7	47.6	50.6	51.7	52.9	54.9	-0.373714
138	846	D	12	7	33	35	115.64	129.14	111.414	35.6	38.1	39.2	39.5	39.8	42.8	45.9	46.9	47.2	48.2	-0.648967
138	846	B	13	1	141	143	112.92	129.37	111.424	41	42.3	42.7	42.5	42.5	45.4	48.5	49.7	50.6	52.4	-0.686511
138	846	D	12	7	37	39	115.68	129.18	111.452	36.8	39.4	40.2	40.3	40.5	43.3	46.2	47.2	47.6	48.7	-0.513049
138	846	B	13	1	145	147	112.96	129.41	111.462	42.1	43.1	43.5	43.1	42.9	46	49	50.2	51.1	53.3	-0.572669
138	846	B	13	2	1	3	113.02	129.47	111.521	46.9	46.8	46.5	46	45.8	48.3	51.1	52.3	53.2	55.5	-0.0741231
138	846	B	13	2	5	7	113.06	129.51	111.559	46.8	47.5	47.6	47	46.9	49.5	52.4	53.4	54.6	56.5	-0.0851509
138	846	B	13	2	9	11	113.1	129.55	111.599	43.9	45.4	45.5	45.3	45.3	48.2	51.4	52.5	53.2	55.6	-0.387542
138	846	B	13	2	13	15	113.14	129.59	111.637	42.4	44.1	44.5	44.2	44.3	47.5	50.6	52	52.5	54.8	-0.544252
138	846	B	13	2	17	19	113.18	129.63	111.676	44.8	45.5	45.6	44.9	44.6	47	50	51	51.6	53.6	-0.295133
138	846	B	13	2	21	23	113.22	129.67	111.714	44.8	45.5	45.5	44.9	44.5	46.8	49.8	50.8	51.9	53.3	-0.295755
138	846	B	13	2	25	27	113.26	129.71	111.754	44	44.8	44.5	44.1	43.7	46.2	49.3	50.1	51.4	53	-0.379624
138	846	B	13	2	29	31	113.3	129.75	111.792	48.6	49.4	49.3	48.5	47.8	50.2	52.7	53.9	54.5	56.4	0.0984222
138	846	B	13	2	33	35	113.34	129.79	111.83	49.8	50.5	50.4	49.3	48.7	50.8	53.4	54.3	55.2	56.7	0.22267
138	846	B	13	2	37	39	113.38	129.83	111.87	49.7	51	50.7	49.9	49.1	51	53.6	54.2	55.2	56.6	0.211642
138	846	B	13	2	41	43	113.42	129.87	111.908	54.2	54.8	54.6	54.2	53.7	55.8	58.4	59.1	60	62	0.679282
138	846	B	13	2	45	47	113.46	129.91	111.947	49.9	51	51	50.4	50.1	52.5	55.2	56.3	57.2	59.3	0.231208
138	846	B	13	2	49	51	113.5	129.95	111.986	44.8	45.9	46.3	46.2	46.5	50.1	53.5	55	56.5	58.9	-0.30011
138	846	B	13	2	53	55	113.54	129.99	112.024	48.3	49.4	49.4	48.8	48.4	51.1	54	55	55.8	58.2	0.0634719
138	846	B	13	2	57	59	113.58	130.03	112.063	53.5	54.1	53.9	53.1	52.4	54.3	56.8	57.5	58.5	59.9	0.603953
138	846	B	13	2	61	63	113.62	130.07	112.102	51.3	51.8	51.5	50.7	50.2	52.3	55.1	55.9	57	58.5	0.374403
138	846	B	13	2	65	67	113.66	130.11	112.141	51.1	52.3	52.1	51.3	50.8	52.9	55.6	56.5	57.2	59.1	0.352968
138	846	B	13	2	69	71	113.7	130.15	112.179	50.1	51	51.2	50.5	50	52.5	55.4	56.4	57.1	59.4	0.248288
138	846	B	13	2	73	75	113.74	130.19	112.217	48.3	49.4	48.9	48.3	47.7	50.1	53	53.8	54.9	57	0.0603605
138	846	B	13	2	77	79	113.78	130.23	112.257	47.4	48.8	48.7	47.9	47.3	49.6	52.3	53.3	53.7	56.1	-0.0339139
138	846	B	13	2	81	83	113.82	130.27	112.295	42.9	43.9	44	43.6	43.5	46.6	49.9	51.1	51.9	54.7	-0.502798
138	846	B	13	2	85	87	113.86	130.31	112.334	48.2	49.9	50.4	49.9	49.7	52.7	55.7	56.7	57.5	59.4	0.0480881
138	846	B	13	2	89	91	113.9	130.35	112.373	46.1	47.2	47.1	46.5	45.9	48.3	50.8	51.9	52.5	54.7	-0.171056
138	846	B	13	2	93	95	113.94	130.39	112.412	47.9	48.6	48.3	47.7	47	49.3	52.1	53	53.9	56	0.015627
138	846	B	13	2	97	99	113.98	130.43	112.45	45	46.5	46.5	46	45.7	48.4	51.6	52.3	53.6	55.3	-0.286764
138	846	B	13	2	101	103	114.02	130.47	112.489	47.4	48.3	48.8	48.4	48.3	51.1	54.2	55.2	55.9	57.7	-0.0376464
138	846	B	13	2	105	107	114.06	130.51	112.523	46.4	47.5	47.7	47.2	47.1	49.8	52.7	53.8	54.7	56.4	-0.142326
138	846	B	13	2	109	111	114.1	130.55	112.548	47.3	48.7	48.4	47.8	47.5	50.1	52.9	53.8	54.7	56.8	-0.0492965
138	846	D	13	1	9	11	115.9	130.5	112.556	49.7	51.4	51.6	50.7	50	51.6	53.9	54.4	54.4	55.1	0.920334
138	846	B	13	2	113	115	114.14	130.59	112.573	44.4	45.5	45.7	45.1	45	47.7	50.7	51.7	52.7	55.1	-0.351687
138	846	D	13	1	13	15	115.94	130.54	112.58	47.5	49	48.7	47.7	46.6	48	50.2	50.7	50.8	51.6	0.667619
138	846	B	13	2	117	119	114.18	130.63	112.599	44.2	44.8	44.6	43.8	43.3	45.8	48.7	49.6	50.7	52.6	-0.373122
138	846	D	13	1	17	19	115.98	130.58	112.605	46.4	48.3	48.5	47.7	46.8	48.5	50.8	51.5	51.3	52	0.540639
138	846	D	13	1	21	23	116.02	130.62	112.629	48	50.8	51.6	51.4	51.2	53.4	55.9	56.5	56.6	57.4	0.722278
138	846	D	13	1	25	27	116.06	130.66	112.653	44.1	46.2	46.8	46.6	46.4	48.9	51.5	52.3	52.6	53.4	0.275247
138	846	D	13	1	29	31	116.1	130.7	112.677	38.4	41	41.8	41.6	41.5	43.9	46.8	47.6	47.8	48.6	-0.37753
138	846	D	13	1	33	35	116.14	130.74	112.701	34.8	36.8	37.3	37	36.8	39.2	42.2	43.1	43.5	44.7	-0.79027
138	846	D	13	1	37	39	116.18	130.78	112.726	38	40.7	41.2	40.8	40.6	42.9	45.7	46.4	46.6	47.7	-0.425745
138	846	D	13	1	41	43	116.22	130.82	112.75	39.5	42.5	43.1	42.7	42.4	44.5	47.2	47.7	47.8	48.4	-0.255536
138	846	D	13	1	45	47	116.26	130.86	112.774	38.4	41.1	41.8	41.7	41.6	44.1	47.1	47.8	48.1	49.4	-0.382516
138	846	D	13	1	49	51	116.3	130.9	112.798	35.5	36.9	37.1	36.8	36.7	39.3	42.1	43.1	43.7	45.1	-0.715243
138	846	D	13	1	53	55	116.34	130.94	112.823	41.7	44.1	44.6	44.2	44	45.9	48.6	49.3	49.2	50.1	-0.00780696
138	846	D	13	1	57	59	116.38	130.98	112.848	45.2	48.1	48.6	47.8	46.9	48.3	50.8	51.2	51	51.7	0.391009
138	846	D	13	1	61	63	116.42	131.02	112.873	41.9	44.6	44.9	44.4	43.8	45.5	48.1	48.7	48.5	49.5	0.0125608
138	846	D	13	1	65	67	116.46	131.06	112.9	35.8	38	38.6	38.4	38.4	40.9	43.9	44.8	45.2	46.7	-0.685938
138	846	D	13	1	69	71	116.5	131.1	112.928	38.2	41.1	41.9	41.8	41.7	44.3	47.2	47.9	47.9	48.7	-0.412856
138	846	D	13	1	73	75	116.54	131.14	112.956	37	39.4	40.1	40	40	42.8	45.8	46.6	46.9	48.1	-0.551267
138	846	D	13	1	77	79	116.58	131.18	112.984	37.3	39.4	39.9	39.7	39.4	41.9	44.8	45.4	46	47	-0.518222
138	846	D	13	1	81	83	116.62	131.22	113.013	37.4	39.1	39.6	39.4	39.1	41.5	44.3	45.2	45.6	46.8	-0.508038
138	846	D	13	1	85	87	116.66	131.26	113.042	41.6	44.2	44.9	44.4	44	46.1	48.7	49.3	49.3	50.3	-0.0292093
138	846	D	13	1	89	91	116.7	131.3	113.071	38.7	41	41.6	41.3	41	43.2	45.9	46.6	46.9	47.8	-0.361936
138	846	D	13	1	93	95	116.74	131.34	113.1	42.8	45.8	46.7	46.5	46.2	48.3	51	51.7	51.6	51.9	0.105462
138	846	D	13	1	97	99	116.78	131.38	113.129	43.2	45.3	45.9	45.6	45.3	47.4	50.1	50.9	51.1	51.7	0.149937
138	846	D	13	1	101	103	116.82	131.42	113.159	47	49.5	50.1	49.9	49.5	51.5	53.9	54.5	54.6	55.4	0.583045
138	846	D	13	1	105	107	116.86	131.46	113.189	36.5	39.1	40.3	40.6	41	44.3	47.5	48.5	49.1	50.1	-0.61839
138	846	D	13	1	109	111	116.9	131.5	113.218	36.8	39.1	40	40	40.3	43.1	46	47	47.3	48.8	-0.585346
138	846	D	13	1	113	115	116.94	131.54	113.248	34.5	36.9	38.1	38.5	39.2	42.8	46.2	47.3	48	49	-0.849491
138	846	D	13	1	117	119	116.98	131.58	113.278	36.7	40	41.4	41.9	42.6	45.9	49.1	50	50.3	51.1	-0.599269
138	846	D	13	1	121	123	117.02	131.62	113.309	28.7	31.3	32.9	33.8	35.2	40.2	44.3	46.1	47.3	48.7	-1.51494
138	846	D	13	1	125	127	117.06	131.66	113.339	29	31.5	32.8	33.4	34.3	38.1	41.8	43	43.6	44.9	-1.4819
138	846	D	13	1	129	131	117.1	131.7	113.369	24.7	26.5	27.4	27.9	28.7	32.4	36	37.3	38.1	39.6	-1.97465
138	846	D	13	1	133	135	117.14	131.74	113.4	26.7	29.2	30.7	31.4	32.5	36.6	40.5	41.9	42.5	43.5	-1.74729
138	846	D	13	1	137	139	117.18	131.78	113.431	19.7	20.9	21.9	22.5	23.4	27.6	31.6	33	34	35.4	-2.54866
138	846	D	13	1	141	143	117.22	131.82	113.461	20.1	21.2	22	22.5	23.2	27.2	31	32.4	33.4	34.8	-2.50419
138	846	D	13	1	145	147	117.26	131.86	113.492	19.5	20.7	21.5	22	22.8	26.8	30.6	32	32.8	34.4	-2.57402
138	846	D	13	2	1	3	117.32	131.92	113.538	24.1	26.5	28.1	29.1	30.4	35.5	39.9	41.6	42.5	43.8	-2.05009
138	846	D	13	2	5	7	117.36	131.96	113.569	20.1	21.5	22.6	23.3	24.3	28.8	32.8	34.5	35.5	36.9	-2.50855
138	846	D	13	2	9	11	117.4	132	113.6	19.1	20.6	21.7	22.5	23.6	28.6	32.9	34.5	35.8	37.3	-2.6241
138	846	D	13	2	13	15	117.44	132.04	113.631	19	20.6	21.7	22.4	23.4	28	32.1	33.7	34.5	36.1	-2.63678
138	846	D	13	2	17	19	117.48	132.08	113.662	18.4	19.7	20.7	21.5	22.7	27.5	31.8	33.5	34.5	36	-2.70661
138	846	D	13	2	21	23	117.52	132.12	113.694	18.4	19.9	20.9	21.7	22.9	27.6	31.9	33.5	34.2	35.8	-2.70785
138	846	D	13	2	25	27	117.56	132.16	113.725	18.8	20.2	21.1	21.8	22.9	27.4	31.5	33	33.9	35.5	-2.66338
138	846	D	13	2	29	31	117.6	132.2	113.756	19.7	21.2	22.1	22.9	23.8	28	32	33.3	34	35.4	-2.56175
138	846	D	13	2	33	35	117.64	132.24	113.788	20.9	22.8	24	24.7	25.8	30.3	34.4	35.8	36.7	38.3	-2.42583
138	846	D	13	2	37	39	117.68	132.28	113.819	20.8	22.3	23.6	24.5	25.8	30.6	34.9	36.3	37.3	38.7	-2.43851
138	846	D	13	2	41	43	117.72	132.32	113.851	20.6	22.2	23.4	24.1	25.2	29.7	33.8	35.2	36.1	38	-2.46262
138	846	D	13	2	45	47	117.76	132.36	113.886	21.7	23.4	24.6	25.4	26.5	30.8	34.6	36	36.9	38.4	-2.33813
138	846	D	13	2	49	51	117.8	132.4	113.922	23.3	25.3	26.5	27.2	28.3	32.5	36.3	37.6	38.5	40	-2.15649
138	846	D	13	2	53	55	117.84	132.44	113.958	21.5	23.5	24.9	25.7	26.9	31.9	36.1	37.8	38.9	40.3	-2.36348
138	846	D	13	2	57	59	117.88	132.48	113.996	24.4	27.1	28.6	29.7	31.2	36	40.2	41.5	42.5	43.6	-2.03325
138	846	D	13	2	61	63	117.92	132.52	114.033	21.8	23.8	25	25.6	26.8	31.5	35.5	36.9	37.8	39.1	-2.33169
138	846	D	13	2	65	67	117.96	132.56	114.071	25.8	28.5	30.1	30.9	32.2	36.4	40.3	41.6	42.2	43.5	-1.87572
138	846	D	13	2	69	71	118	132.6	114.108	27.9	30.9	32.5	33.4	34.7	38.9	42.8	44	44.5	45.6	-1.63693
138	846	D	13	2	73	75	118.04	132.64	114.146	25	27.3	28.6	29.4	30.5	34.6	38.4	39.6	40.2	41.6	-1.96965
138	846	D	13	2	77	79	118.08	132.68	114.184	26.4	29.4	31.1	32.1	33.5	38.1	42.1	43.6	44.2	45.6	-1.81088
138	846	D	13	2	81	83	118.12	132.72	114.221	25.4	28.1	29.8	30.9	32.4	37.4	41.8	43.4	44.4	46	-1.92643
138	846	D	13	2	85	87	118.16	132.76	114.259	24.1	26.4	27.8	28.7	30	34.3	38.3	39.9	40.7	42.2	-2.07627
138	846	D	13	2	89	91	118.2	132.8	114.296	22.2	24	25	25.7	26.6	30.6	34.5	35.8	36.7	38.1	-2.29469
138	846	D	13	2	93	95	118.24	132.84	114.334	24	26.3	27.6	28.4	29.5	33.9	37.7	39.2	39.8	41.5	-2.09019
138	846	D	13	2	97	99	118.28	132.88	114.371	25.1	27.5	28.8	29.6	30.8	35.1	39.1	40.5	41.2	42.3	-1.9657
138	846	D	13	2	101	103	118.32	132.92	114.409	28.8	31.6	33.1	33.8	34.9	39.2	43.2	44.5	45.1	46.4	-1.54403
138	846	D	13	2	105	107	118.36	132.96	114.446	28.8	31.1	32.3	32.7	33.5	37.3	40.8	42.1	42.6	43.8	-1.54527
138	846	D	13	2	109	111	118.4	133	114.484	28.5	30.7	31.9	32.5	33.3	37.3	40.9	42.2	42.8	43.9	-1.58081
138	846	D	13	2	113	115	118.44	133.04	114.521	26.5	28.8	30	30.5	31.3	35.5	39.4	40.9	41.8	43	-1.81066
138	846	D	13	2	117	119	118.48	133.08	114.557	29.3	31.5	32.6	33	33.5	36.9	40.3	41.5	42.2	43.5	-1.49186
138	846	D	13	2	121	123	118.52	133.12	114.593	29.7	32.2	33.4	34	34.7	38.6	42.3	43.5	44.2	45.6	-1.44738
138	846	D	13	2	125	127	118.56	133.16	114.627	31.7	34.1	35.2	35.6	36.1	39.6	43	44.1	44.9	46.1	-1.22002
138	846	D	13	2	129	131	118.6	133.2	114.661	40.7	43.4	44.5	44.8	45.1	48.1	51.1	52	52.5	53.5	-0.192538
138	846	D	13	2	133	135	118.64	133.24	114.695	43.3	46.3	47.6	48	48.4	51.8	54.9	56	56.5	57.4	0.103406
138	846	D	13	2	137	139	118.68	133.28	114.727	49.5	52.2	53.2	53.2	53	55.5	58	58.8	59.1	60.1	0.810842
138	846	D	13	2	141	143	118.72	133.32	114.759	47.4	50.3	51.2	50.9	50.7	52.8	55.3	55.9	55.9	56.6	0.569558
138	846	D	13	2	145	147	118.76	133.36	114.791	42.2	44.6	45.2	44.8	44.3	46.4	49	49.8	49.9	50.9	-0.026068
138	846	D	13	3	1	3	118.82	133.42	114.839	48.5	51.7	52.2	51.4	50.5	51.9	54.2	54.6	54.4	55.1	0.692175
138	846	D	13	3	5	7	118.86	133.46	114.871	31.8	34	34.8	34.9	35.2	38.9	42.4	43.5	44.1	45.4	-1.21794
138	846	D	13	3	9	11	118.9	133.5	114.903	45.1	47.9	48.6	48.4	48	50.1	52.6	53.2	53.2	53.8	0.30105
138	846	D	13	3	13	15	118.94	133.54	114.935	49.5	52.4	53.1	52.6	52.2	53.9	56.3	56.8	56.8	57.2	0.80274
138	846	D	13	3	17	19	118.98	133.58	114.967	48.4	50.8	51.4	51	50.6	52.4	54.7	55.3	55.7	56.4	0.675759
138	846	D	13	3	21	23	119.02	133.62	114.999	48.1	50.6	51.4	51	50.6	52.8	55.2	55.9	56.1	57	0.640221
138	846	D	13	3	25	27	119.06	133.66	115.031	47.7	50.1	50.9	50.6	50.1	51.9	54.3	55.1	55.2	55.7	0.593253
138	846	D	13	3	29	31	119.1	133.7	115.063	42	45	45.9	46.1	46.4	49	51.8	52.7	52.8	53.6	-0.0595239
138	846	D	13	3	33	35	119.14	133.74	115.095	41.9	44.5	45.4	45.3	45.3	47.6	50.4	51.1	51.3	52.1	-0.0722008
138	846	D	13	3	37	39	119.18	133.78	115.127	37.1	39.5	40.6	40.8	41.1	44.1	47.2	48.3	48.9	49.8	-0.622105
138	846	D	13	3	41	43	119.22	133.82	115.159	39.7	42.6	43.9	44.3	44.6	47.6	50.6	51.5	51.8	52.7	-0.326162
138	846	D	13	3	45	47	119.26	133.86	115.191	37.5	40.4	41.7	42.2	42.7	46.1	49.3	50.5	51	52.3	-0.578876
138	846	D	13	3	49	51	119.3	133.9	115.224	34.8	37.2	38.4	38.6	39.1	42.3	45.4	46.4	47.3	48	-0.888743
138	846	D	13	3	53	55	119.34	133.94	115.256	35.7	38.4	39.5	39.9	40.2	43.5	46.7	47.7	48.2	49.4	-0.787116
138	846	D	13	3	57	59	119.38	133.98	115.289	35.6	38.2	39.3	39.6	40	43.2	46.4	47.4	47.9	49.2	-0.799793
138	846	D	13	3	61	63	119.42	134.02	115.322	39.7	43	44.2	44.3	44.5	47.2	50.1	51	51.2	51.9	-0.332394
138	846	D	13	3	65	67	119.46	134.06	115.359	36.9	39.5	40.6	40.7	40.9	43.7	46.8	47.7	48.1	49.1	-0.653691
138	846	D	13	3	69	71	119.5	134.1	115.396	36.9	39.7	40.9	41.1	41.3	44.2	47.3	48.4	48.7	49.8	-0.654938
138	846	D	13	3	73	75	119.54	134.14	115.434	36.7	39.1	40.1	40.3	40.5	43.6	46.7	47.7	48.2	49.5	-0.679045
138	846	D	13	3	77	79	119.58	134.18	115.471	35.9	38.6	39.9	40.2	40.8	44.2	47.6	48.8	49.2	50.5	-0.771734
138	846	D	13	3	81	83	119.62	134.22	115.509	34.2	36.6	37.6	38	38.4	41.7	44.9	46.1	46.6	47.8	-0.967297
138	846	D	13	3	85	87	119.66	134.26	115.547	34.7	37.3	38.6	39	39.6	42.8	46	47.3	47.6	48.6	-0.911392
138	846	D	13	3	89	91	119.7	134.3	115.585	34.9	37.2	38.4	38.8	39.3	42.4	45.5	46.5	47	48.1	-0.889777
138	846	D	13	3	93	95	119.74	134.34	115.622	38.3	41.5	42.9	43.7	44.7	48.4	51.7	52.9	53.4	54.5	-0.502391
138	846	D	13	3	97	99	119.78	134.38	115.66	41.8	45	46.5	47.1	47.7	50.9	54	55.1	55.2	56.2	-0.103575
138	846	D	13	3	101	103	119.82	134.42	115.697	35.6	38.8	40.5	41.4	42.6	47.4	51.3	52.9	53.9	55.2	-0.813504
138	846	D	13	3	105	107	119.86	134.46	115.735	39.9	43	44.6	45.5	46.4	50.4	53.8	55.1	55.8	56.8	-0.323245
138	846	D	13	3	109	111	119.9	134.5	115.772	41.3	43.8	44.9	45.3	45.8	48.7	51.7	52.7	53.2	54.5	-0.164466
138	846	D	13	3	113	115	119.94	134.54	115.81	43.1	45.9	47.2	47.6	48.1	51	54	54.9	55.3	56.2	0.0400338
138	846	D	13	3	117	119	119.98	134.58	115.847	45	48	49.7	50.5	51.2	54.2	57.2	58.1	58.6	59.4	0.255964
138	846	D	13	3	121	123	120.02	134.62	115.885	40	42.6	43.9	44.3	44.7	47.9	50.8	51.8	52.2	53.5	-0.316801
138	846	D	13	3	125	127	120.06	134.66	115.922	38.8	41.1	42.2	42.6	43	46.1	49.1	50.2	50.7	52	-0.455211
138	846	D	13	3	129	131	120.1	134.7	115.96	43.2	46.4	47.7	48.2	48.7	51.7	54.7	55.5	56	56.8	0.0464781
138	846	D	13	3	133	135	120.14	134.74	115.996	42.2	45	46.3	46.8	47.3	50.5	53.6	54.7	55.2	56.5	-0.069072
138	846	D	13	3	137	139	120.18	134.78	116.029	40.2	42.4	43.5	43.8	44.1	46.9	49.9	51	51.7	52.7	-0.298926
138	846	D	13	3	141	143	120.22	134.82	116.061	41	43.5	44.6	44.8	45	47.7	50.5	51.4	51.9	52.7	-0.208729
138	846	D	13	3	145	147	120.26	134.86	116.093	36.6	39.5	41.1	41.7	42.4	46.6	50.1	51.4	52.2	53.8	-0.712912
138	846	D	13	4	1	3	120.32	134.92	116.141	37.4	39.8	40.7	41	41.3	44.2	47.3	48.3	48.8	49.9	-0.623339
138	846	D	13	4	5	7	120.36	134.96	116.173	38.3	40.8	41.7	42	42.4	45.3	48.1	49.1	49.5	50.3	-0.521712
138	846	D	13	4	9	11	120.4	135	116.205	40	42.7	43.7	43.9	44	46.6	49.6	50.3	50.7	51.6	-0.328642
138	846	D	13	4	13	15	120.44	135.04	116.237	36	38.1	38.8	38.7	38.7	41.3	44.2	45	45.4	46.6	-0.787103
138	846	D	13	4	17	19	120.48	135.08	116.269	33.2	35.1	35.7	35.6	35.7	38.5	41.7	42.6	43	44.5	-1.1084
138	846	D	13	4	21	23	120.52	135.12	116.301	32.4	34.3	35	34.9	34.9	37.8	40.8	41.9	42.3	43.4	-1.20109
138	846	D	13	4	25	27	120.56	135.16	116.333	31.5	33.4	34.2	34.3	34.5	37.7	41	42.2	42.6	43.8	-1.30521
138	846	D	13	4	29	31	120.6	135.2	116.365	34.3	36.1	36.6	36.3	36	38.5	41.5	42.3	42.7	43.9	-0.986406
138	846	D	13	4	33	35	120.64	135.24	116.397	35.4	37	37.4	37	36.7	38.8	41.7	42.4	42.8	43.5	-0.861918
138	846	D	13	4	37	39	120.68	135.28	116.429	35.4	37.5	37.9	37.4	36.9	39.1	42	42.8	42.8	43.9	-0.863165
138	846	D	13	4	41	43	120.72	135.32	116.461	38	39.5	39.6	38.7	37.6	39.3	42	42.6	42.5	43.5	-0.567222
138	846	D	13	4	45	47	120.76	135.36	116.493	33.5	34.6	34.9	34.6	34.4	36.8	39.9	40.9	41.8	43.1	-1.08283
138	846	D	13	4	49	51	120.8	135.4	116.525	43.5	46.4	47.1	46.8	46.6	48.6	51.2	52	52.2	52.9	0.0589556
138	846	D	13	4	53	55	120.84	135.44	116.557	44.6	46.7	47.3	47	46.7	48.6	51	51.7	51.9	52.8	0.183443
138	846	D	13	4	57	59	120.88	135.48	116.59	44.6	46.9	47.7	47.9	47.9	49.9	52.5	53.3	53.4	54.7	0.182197
138	846	D	13	4	61	63	120.92	135.52	116.622	47.3	49.4	49.7	48.9	47.9	49.2	51.5	52.1	52	52.5	0.48957
138	846	D	13	4	65	67	120.96	135.56	116.656	49.1	51.6	52.1	51.7	51.3	53	55.2	55.9	55.8	56.6	0.69407
138	846	D	13	4	69	71	121	135.6	116.691	43.7	45.5	45.8	45.5	45.2	47.3	49.8	50.6	50.8	51.8	0.0755839
138	846	D	13	4	73	75	121.04	135.64	116.726	45.2	47.7	48.6	48.6	48.7	51.3	54.1	55	55.4	56.5	0.245793
138	846	D	13	4	77	79	121.08	135.68	116.76	45.7	48.5	49.4	49.5	49.7	52.2	54.9	55.7	56.1	57	0.301698
138	846	D	13	4	81	83	121.12	135.72	116.795	41.3	43.8	44.7	45	45.2	48.1	51.1	52.3	52.8	53.8	-0.202484
138	846	D	13	4	85	87	121.16	135.76	116.828	45.4	47.7	48.5	48.6	48.6	50.6	53.3	54.1	54.1	54.8	0.264914
138	846	D	13	4	89	91	121.2	135.8	116.861	34.7	36.8	37.9	38.2	38.9	42.6	46.1	47.4	48.3	50	-0.959382
138	846	D	13	4	93	95	121.24	135.84	116.894	38.5	41.6	42.9	43.4	44.3	48.1	51.7	52.8	53.5	54.9	-0.526274
138	846	D	13	4	97	99	121.28	135.88	116.926	38.7	41.7	42.8	43.3	44	47.3	50.4	51.7	52.1	53.1	-0.50466
138	846	D	13	4	101	103	121.32	135.92	116.958	42.7	45.6	46.8	47.3	47.6	50.5	53.6	54.4	54.4	55.7	-0.0486917
138	846	D	13	4	105	107	121.36	135.96	116.99	38.7	41.6	43	43.3	43.9	47.6	50.8	51.9	52.6	53.9	-0.507153
138	846	D	13	4	109	111	121.4	136	117.022	39.6	42.2	43.3	43.7	44.2	47.4	50.5	51.7	52	52.7	-0.405526
138	846	D	13	4	113	115	121.44	136.04	117.054	43.3	46.2	47.3	47.5	47.7	50.4	53.1	53.9	54.2	55	0.016151
138	846	D	13	4	117	119	121.48	136.08	117.086	39.4	42	43.1	43.4	43.7	46.7	49.7	50.5	50.9	51.8	-0.43088
138	846	D	13	4	121	123	121.52	136.12	117.118	37.8	40.4	41.6	41.9	42.3	45.5	48.6	49.7	50	51.2	-0.615012
138	846	D	13	4	125	127	121.56	136.16	117.15	39.1	41.7	42.6	42.8	43.1	46	49	49.9	50.4	51.2	-0.467664
138	846	D	13	4	129	131	121.6	136.2	117.182	38.6	41	42	42.2	42.4	45.3	48.1	49	49.8	50.6	-0.526062
138	846	D	13	4	133	135	121.64	136.24	117.214	36.7	39	40.1	40.6	40.9	44.3	47.4	48.4	49.2	50.4	-0.744486
138	846	D	13	4	137	139	121.68	136.28	117.246	37	39.9	41.2	41.6	42.3	46	49.5	50.5	51.3	52.3	-0.711441
138	846	D	13	4	141	143	121.72	136.32	117.278	37.3	39.9	41.1	41.4	41.9	45	48.1	49.2	49.5	51	-0.678396
138	846	D	13	4	145	147	121.76	136.36	117.31	34.2	36.5	37.7	38.1	38.8	42.1	45.6	46.5	47.4	48.4	-1.03398
138	846	D	13	5	1	3	121.82	136.42	117.358	35.3	38.1	39.5	39.9	40.6	44.1	47.5	48.5	49	49.8	-0.91012
138	846	D	13	5	5	7	121.86	136.46	117.39	37.3	40.3	41.2	41.6	41.8	44.8	47.8	48.7	49.1	49.9	-0.682759
138	846	D	13	5	9	11	121.9	136.5	117.422	35.8	38	39.1	39.3	39.7	42.8	46	47	47.7	48.8	-0.855461
138	846	D	13	5	13	15	121.94	136.54	117.454	42.2	45.2	46.1	46.1	46.2	48.5	51.4	52.1	52.5	53	-0.125164
138	846	D	13	5	17	19	121.98	136.58	117.486	38.5	40.9	42	42.2	42.6	45.7	48.8	49.6	50.3	51.3	-0.549334
138	846	D	13	5	21	23	122.02	136.62	117.518	36.2	38.6	39.5	39.9	40.2	43.4	46.5	47.6	48.1	49.6	-0.813479
138	846	D	13	5	25	27	122.06	136.66	117.551	36.1	38.3	39.2	39.3	39.4	42.2	45.3	46.1	46.4	47.5	-0.826156
138	846	D	13	5	29	31	122.1	136.7	117.583	35.7	38	38.7	38.7	38.7	41.4	44.3	45.2	45.5	46.6	-0.873124
138	846	D	13	5	33	35	122.14	136.74	117.615	34.8	37	37.8	37.8	37.9	40.7	43.9	44.7	45.3	46.5	-0.977244
138	846	D	13	5	37	39	122.18	136.78	117.647	36.7	38.6	39.7	39.8	39.9	42.9	45.8	46.9	47.3	48.2	-0.761313
138	846	D	13	5	41	43	122.22	136.82	117.679	43.7	45.9	46.6	46.6	46.4	48.8	51.5	52.3	52.6	53.2	0.0375658
138	846	D	13	5	45	47	122.26	136.86	117.711	43.4	45.4	46.4	46.3	46.3	48.9	51.6	52.6	52.9	54.1	0.00202822
138	846	D	13	5	49	51	122.3	136.9	117.743	42.2	45	46.3	46.5	47	50	53	54	54.3	55.3	-0.136383
138	846	D	13	5	53	55	122.34	136.94	117.776	40.1	42.6	43.8	44.1	44.7	48	51.3	52.3	53.4	53.8	-0.377667
138	846	D	13	5	57	59	122.38	136.98	117.811	44.8	47.5	48.7	49	49.4	52.4	55.3	56.1	56.8	57.8	0.158314
138	846	D	13	5	61	63	122.42	137.02	117.845	46.8	50	51.2	51.6	52.1	55.2	58.2	59	59.4	60.7	0.385675
138	846	D	13	5	65	67	122.46	137.06	117.88	44.4	47	48.2	48.5	49	52.2	55.1	56.3	57	58.3	0.110099
138	846	D	13	5	69	71	122.5	137.1	117.915	44.1	46.8	47.9	48.4	49.1	52.4	55.5	56.7	57.3	58.7	0.0745618
138	846	D	13	5	73	75	122.54	137.14	117.95	51	54.3	55.6	56.1	56.5	59.1	61.7	62.5	62.8	63.4	0.862011
138	846	D	13	5	77	79	122.58	137.18	117.987	49.6	52.6	53.7	53.9	54.3	57	59.7	60.4	60.8	61.6	0.700739
138	846	D	13	5	81	83	122.62	137.22	118.024	46.8	49.8	50.9	51.2	51.6	54.5	57.3	58.3	58.7	60.1	0.379442
138	846	D	13	5	85	87	122.66	137.26	118.062	48.6	51.7	52.9	53.2	53.5	56.2	59	59.9	60.3	61	0.583942
138	846	D	13	5	89	91	122.7	137.3	118.099	49.7	52.6	53.8	54	54.2	56.9	59.6	60.5	60.7	61.8	0.70843
138	846	D	13	5	93	95	122.74	137.34	118.137	44	46.7	47.8	48.1	48.5	51.9	55	56.2	56.9	57.9	0.0556525
138	846	D	13	5	97	99	122.78	137.38	118.175	50.1	52.9	53.8	53.8	53.8	55.9	58.4	59.2	59.3	60	0.751658
138	846	D	13	5	101	103	122.82	137.42	118.212	50.6	53.5	54.4	54.2	54.1	56.4	58.7	59.3	59.4	60.2	0.807564
138	846	D	13	5	105	107	122.86	137.46	118.25	49.6	52.7	53.7	53.6	53.7	56.2	58.8	59.5	59.9	60.6	0.692014
138	846	D	13	5	109	111	122.9	137.5	118.287	46.1	48.7	49.8	50	50.2	53.1	55.9	56.8	57.3	58.4	0.290704
138	846	D	13	5	113	115	122.94	137.54	118.325	46.5	49.4	50.4	50.5	50.6	53.2	55.9	56.6	56.9	57.9	0.335179
138	846	D	13	5	117	119	122.98	137.58	118.362	51	53.8	54.6	54.4	54	56.1	58.5	59.2	59.4	60	0.848299
138	846	D	13	5	121	123	123.02	137.62	118.4	51.1	53.9	54.7	54.4	54.1	56.4	58.8	59.6	59.7	60.3	0.858483
138	846	D	13	5	125	127	123.06	137.66	118.437	53.4	56.2	56.8	56.3	55.7	57.3	59.6	59.9	59.8	60.4	1.12013
138	846	D	13	5	129	131	123.1	137.7	118.475	52.3	54.8	55.5	55	54.4	56	58.3	58.8	58.8	59.4	0.993154
138	846	D	13	5	133	135	123.14	137.74	118.512	46.7	49.3	50.1	50	49.8	52.2	54.8	55.6	56	57.1	0.351807
138	846	D	13	5	137	139	123.18	137.78	118.55	46	48.6	49.6	49.6	49.5	52.1	54.8	55.6	55.8	56.8	0.270548
138	846	D	13	5	141	143	123.22	137.82	118.587	46	48.6	49.5	49.4	49.2	51.5	54.1	54.9	55.1	55.8	0.269302
138	846	D	13	5	145	147	123.26	137.86	118.625	45.6	48.3	49.1	48.9	48.6	50.9	53.6	54.3	54.5	55.3	0.222334
138	846	D	13	6	1	3	123.32	137.92	118.681	49.3	51.5	52	51.3	50.7	52.7	55.2	56	56.2	57.6	0.643388
138	846	D	13	6	5	7	123.36	137.96	118.718	51.7	53.6	53.9	53.3	52.7	54.5	56.8	57.5	57.8	59.2	0.91647
138	846	D	13	6	9	11	123.4	138	118.756	52.5	54.6	55.1	54.9	54.6	56.7	59.1	59.9	60.3	61.6	1.00667
138	846	D	13	6	13	15	123.44	138.04	118.793	59.4	61.7	62.1	61.6	60.9	62.4	64.4	64.9	65.1	66	1.79412
138	846	D	13	6	17	19	123.48	138.08	118.831	59.7	62.1	62.6	62.2	61.7	63.3	65.4	66	66.1	67.2	1.82716
138	846	D	13	6	21	23	123.52	138.12	118.868	58.1	59.9	60.2	59.8	59.5	61.2	63.4	64.1	64.5	65.8	1.64303
138	846	D	13	6	25	27	123.56	138.16	118.905	53.8	55.1	55.3	54.9	54.6	56.4	58.7	59.6	60.2	61.4	1.15028
138	846	D	13	6	29	31	123.6	138.2	118.942	58.3	60.3	60.7	60.3	59.9	61.6	63.8	64.5	64.8	66	1.6634
138	846	D	13	6	33	35	123.64	138.24	118.978	55.4	57.2	57.4	57	56.5	58.3	60.5	61.3	61.7	63	1.33067
138	846	D	13	6	37	39	123.68	138.28	119.012	51.1	53	53.4	53.2	53	55	57.5	58.4	58.8	60	0.837916
138	846	D	13	6	41	43	123.72	138.32	119.047	53.8	55.7	56	55.6	55.1	56.7	59	59.7	60	60.9	1.14529
138	846	D	13	6	45	47	123.76	138.36	119.082	56.8	58.8	58.9	58.3	57.6	58.9	61	61.6	61.8	62.8	1.48695
138	846	D	13	6	49	51	123.8	138.4	119.116	51.9	54	54.3	53.8	53.4	55.1	57.4	58.1	58.3	59.2	0.925619
138	846	D	13	6	53	55	123.84	138.44	119.15	50.4	52.6	53.1	52.7	52.3	54.3	56.7	57.5	57.7	59	0.752917
138	846	D	13	6	57	59	123.88	138.48	119.181	48.7	51.1	51.6	50.9	50.4	52.2	54.7	55.3	55.4	56.2	0.557355
138	846	D	13	6	61	63	123.92	138.52	119.213	42.8	44.9	45.5	45.2	45.1	47.7	50.6	51.5	52	53	-0.118283
138	846	D	13	6	65	67	123.96	138.56	119.244	44.2	45.8	46	45.3	44.7	46.7	49.2	49.9	50.2	51.4	0.0404952
138	846	D	13	6	69	71	124	138.6	119.276	42.2	43.9	44	43.2	42.4	44.2	46.7	47.4	47.5	48.6	-0.189359
138	846	D	13	6	73	75	124.04	138.64	119.307	40	41.6	41.6	40.7	40	41.8	44.5	45	45.3	46.3	-0.442073
138	846	D	13	6	77	79	124.08	138.68	119.339	36.9	38.9	39.6	39.4	39.4	42.6	45.7	46.7	47.1	48.4	-0.797661
138	846	D	13	6	81	83	124.12	138.72	119.37	40.5	41.9	42.1	41.7	41.4	43.8	46.6	47.5	47.9	49.2	-0.387414
138	846	D	13	6	85	87	124.16	138.76	119.401	42.4	43.8	44.1	43.7	43.4	45.5	48.3	49.2	49.6	51	-0.171484
138	846	D	13	6	89	91	124.2	138.8	119.433	48.6	50.1	50.2	49.8	49.2	51	53.4	54.3	54.8	55.9	0.535952
138	846	D	13	6	93	95	124.24	138.84	119.464	45.1	46.4	46.8	46.6	46.6	49	51.7	52.7	53.5	54.9	0.134643
138	846	D	13	6	97	99	124.28	138.88	119.495	59.3	60.7	60.8	60.3	59.8	61	63	63.8	64.2	65.2	1.75651
138	846	D	13	6	101	103	124.32	138.92	119.526	66.5	68	68.1	67.6	66.9	67.9	69.7	70.5	70.7	71.8	2.57825
138	846	D	13	6	105	107	124.36	138.96	119.557	66	67.1	66.8	66	65	65.5	67.2	67.8	67.9	68.5	2.51985
138	846	D	13	6	109	111	124.4	139	119.588	65.5	67.5	67.5	66.8	65.8	66.6	68.3	68.8	68.8	69.5	2.46145
138	846	D	13	6	113	115	124.44	139.04	119.619	55.2	56.6	56.8	56.5	56.1	57.7	59.9	60.6	60.9	61.8	1.28288
138	846	D	13	6	117	119	124.48	139.08	119.651	59.8	61.3	61.3	60.8	60.3	61.5	63.6	64.3	64.6	65.5	1.80743
138	846	D	13	6	121	123	124.52	139.12	119.682	62.4	64.1	64.3	63.9	63.4	64.6	66.6	67.4	67.5	68.5	2.10337
138	846	D	13	6	125	127	124.56	139.16	119.713	52.1	52.4	52.1	51.5	51.1	52.7	55	56.1	57	58.4	0.924797
138	846	D	13	6	129	131	124.6	139.2	119.745	65	66.9	66.6	65.1	63.5	63.7	65.3	65.8	65.7	66.2	2.39807
138	846	D	13	6	133	135	124.64	139.24	119.776	61.9	63.5	63.6	63	62	62.8	64.7	65.4	65.5	66.2	2.04248
138	846	D	13	6	137	139	124.68	139.28	119.807	57.7	59.2	59.1	58.2	57.3	58.5	60.6	61.3	61.7	62.3	1.56116
138	846	D	13	6	141	143	124.72	139.32	119.838	56.2	57.2	57	56.1	55.3	56.6	58.8	59.5	59.8	60.7	1.38846
138	846	D	13	6	145	147	124.76	139.36	119.87	61.5	63.3	63.2	62.2	61.2	62.1	64.1	64.8	64.8	65.6	1.99302
138	846	D	13	7	1	3	124.82	139.42	119.916	52.9	55.4	55.5	54.5	53.4	54.5	56.6	57.3	57.2	57.7	1.00814
138	846	D	13	7	5	7	124.86	139.46	119.948	52.2	53.9	53.9	52.9	51.9	53.1	55.4	56.1	56.2	57	0.926878
138	846	D	13	7	9	11	124.9	139.5	119.979	47.8	49.1	48.9	48.1	47.2	48.6	51	51.9	52.2	53.5	0.422696
138	846	D	13	7	13	15	124.94	139.54	120.01	57.2	59.2	58.8	57.1	55.3	55.6	57.4	57.9	57.7	58.4	1.4959
138	846	D	13	7	17	19	124.98	139.58	120.041	59.2	61.4	61.1	59.3	57.3	57.5	59.2	59.5	59.4	59.7	1.72326
138	846	D	13	7	21	23	125.02	139.62	120.072	53.6	55.3	55.2	54.5	53.7	55	57.1	57.9	58	58.7	1.08192
138	846	D	13	7	25	27	125.06	139.66	120.104	48.2	49.4	49.8	49.7	49.8	52.1	54.8	56.2	57.2	58.7	0.463431
138	846	D	13	7	29	31	125.1	139.7	120.135	58.9	61.4	61.8	61.6	61.3	62.9	65	65.9	66.2	67	1.68523
138	846	D	13	7	33	35	125.14	139.74	120.166	55.2	56.9	57.2	57.1	56.9	58.6	61.1	61.8	62.2	63.1	1.26106
138	846	D	13	7	37	39	125.18	139.78	120.197	59.5	62	61.9	60.9	59.6	60.4	62.3	62.7	62.5	63.4	1.75132
138	846	D	13	7	41	43	125.22	139.82	120.228	58.2	59.8	59.8	59	58.2	59.3	61.5	62.1	62.1	63	1.60148
138	846	D	13	7	45	47	125.26	139.86	120.259	49.6	50.9	50.7	49.9	49.3	50.8	53.1	53.8	54.2	55	0.617224
138	846	D	13	7	49	51	125.3	139.9	120.29	43.9	45.1	45.2	44.7	44.3	46.4	49.1	50	50.6	51.6	-0.0355535
138	846	D	13	7	53	55	125.34	139.94	120.321	47.8	50	50.2	49.5	48.7	50.4	52.8	53.4	53.5	54.5	0.408984
138	846	D	13	7	57	59	125.38	139.98	120.352	45.6	48	48.2	47.5	46.8	48.7	51.2	51.9	51.7	52.9	0.15627
138	846	D	13	7	61	63	125.42	140.02	120.384	47.1	49.9	50.2	49.4	48.7	50.5	52.9	53.6	53.4	54.4	0.326479
138	846	D	13	7	65	67	125.46	140.06	120.415	46.9	48.8	48.7	47.9	47.1	48.8	51.3	51.9	51.8	52.8	0.302372
138	846	D	13	7	69	71	125.5	140.1	120.446	43	44.6	44.7	43.9	43.2	45.1	47.8	48.5	48.9	49.9	-0.144659
138	846	D	13	7	73	75	125.54	140.14	120.479	42.7	45	45	44.1	43.3	45	47.6	48.2	48.3	48.9	-0.180197
138	846	B	14	2	25	27	122.76	139.91	120.481	47.1	47.7	47.4	46.3	45.4	47.5	50.3	51.1	51.3	53.1	-0.215684
138	846	D	13	7	77	79	125.58	140.18	120.515	43.9	46.5	46.6	45.5	44.4	45.7	48.2	48.7	48.5	49.3	-0.0442789
138	846	B	14	2	29	31	122.8	139.95	120.516	46.2	45.8	44.9	43.6	42.7	44.5	47.2	48.3	48.9	50.4	-0.309958
138	846	B	14	2	33	35	122.84	139.99	120.551	52.1	52.4	51.6	50.1	48.6	50.1	52.5	53.2	53.7	55.1	0.303364
138	846	B	14	2	37	39	122.88	140.03	120.588	52.1	52.1	51.4	50.2	49.3	51.1	53.6	54.6	55.4	57.2	0.302741
138	846	B	14	2	41	43	122.92	140.07	120.624	61.2	61.6	60.9	59.4	58	59.1	61.2	61.9	62.4	64	1.24905
138	846	B	14	2	45	47	122.96	140.11	120.66	66.6	66.9	65.8	64.1	62.4	63.1	64.9	65.6	65.7	66.9	1.81034
138	846	B	14	2	49	51	123	140.15	120.697	66	66	65	63.3	61.9	62.8	64.8	65.5	65.8	67.4	1.74729
138	846	B	14	2	53	55	123.04	140.19	120.733	61.7	61.7	60.7	59.2	57.7	58.9	60.9	61.8	62.2	63.5	1.29922
138	846	B	14	2	57	59	123.08	140.23	120.77	65.8	65.8	64.6	62.5	60.5	61.1	62.9	63.4	63.7	65.2	1.72523
138	846	B	14	2	61	63	123.12	140.27	120.806	69.6	69.7	68.5	66.4	64.2	64.5	66.2	66.6	66.8	68.2	2.12002
138	846	B	14	2	65	67	123.16	140.31	120.842	74.5	73.8	72.3	70.4	68.6	69	70.5	71	71.4	72.8	2.62929
138	846	B	14	2	69	71	123.2	140.35	120.879	59.9	59	57.9	56.7	55.6	57.2	59.5	60.5	61.6	63.7	1.10942
138	846	B	14	2	73	75	123.24	140.39	120.914	62.6	62.1	61.2	60	58.9	60.4	62.5	63.5	64.5	66.5	1.38975
138	846	B	14	2	77	79	123.28	140.43	120.951	72.7	72.7	71.1	68.7	66.3	66.4	67.9	68.3	68.5	69.8	2.44012
138	846	B	14	2	81	83	123.32	140.47	120.987	64.4	64.5	63.4	61.7	60.1	61.2	63.2	64	64.5	66.1	1.57582
138	846	B	14	2	85	87	123.36	140.51	121.024	72	71.9	70.5	68.2	65.8	66.1	67.5	68	68.3	70.1	2.36603
138	846	B	14	2	89	91	123.4	140.55	121.06	72.9	72.4	71	69	66.9	67.4	69	69.6	69.9	71.4	2.45906
138	846	B	14	2	93	95	123.44	140.59	121.096	72.5	71.9	70.4	68.5	66.7	67.4	69	69.6	70	71.5	2.41683
138	846	B	14	2	97	99	123.48	140.63	121.133	73.8	73.7	72.1	69.9	67.6	67.7	69.1	69.5	69.7	70.9	2.55147
138	846	B	14	2	101	103	123.52	140.67	121.169	72.2	71.7	70.3	68.5	66.7	67.2	68.8	69.4	69.5	70.8	2.38436
138	846	B	14	2	105	107	123.56	140.71	121.206	61.3	60.8	59.5	57.8	56.3	57.5	59.5	60.3	60.8	62.2	1.2495
138	846	B	14	2	109	111	123.6	140.75	121.242	64.4	64	62.7	60.9	59.1	60.2	62.1	62.7	63	64.4	1.57146
138	846	B	14	2	113	115	123.64	140.79	121.277	60.9	60.3	59	57.3	55.8	57	59	59.8	60.4	61.8	1.20663
138	846	B	14	2	117	119	123.68	140.83	121.314	62.8	63	62.1	60.7	59.7	61	63.4	63.9	64.3	66.1	1.40372
138	846	B	14	2	121	123	123.72	140.87	121.35	70.4	70.4	69.2	67.4	65.5	66.2	67.7	68.5	68.4	70	2.19394
138	846	B	14	2	125	127	123.76	140.91	121.387	66.6	66.2	65.2	63.8	62.6	63.9	65.9	66.8	67.4	69.1	1.79789
138	846	B	14	2	129	131	123.8	140.95	121.423	60.7	60.6	60.2	59.4	58.9	61.2	63.7	64.8	65.6	67.2	1.18333
138	846	B	14	2	133	135	123.84	140.99	121.46	72.4	71.9	70.7	69.2	67.8	68.7	70.3	70.9	71.7	72.7	2.40019
138	846	B	14	2	137	139	123.88	141.03	121.496	75.8	76.2	75.1	73.2	71.5	72.2	73.7	74.5	75	75.7	2.75337
138	846	B	14	2	141	143	123.92	141.07	121.532	76.4	76.1	74.5	72.5	70.5	70.8	72.1	72.6	73.1	74.2	2.81519
138	846	B	14	2	145	147	123.96	141.11	121.569	66.2	65.6	64.4	62.7	61.2	62.2	64.1	64.8	65.2	66.6	1.75316
138	846	B	14	3	2	4	124.03	141.18	121.632	70	69.4	68.4	66.9	65.6	66.7	68.4	69.2	69.7	71.2	2.1475
138	846	B	14	3	6	8	124.07	141.22	121.668	77.8	76.9	75.7	74.2	72.7	73.6	75	75.7	76.3	78	2.95853
138	846	B	14	3	10	12	124.11	141.26	121.704	77.5	76.1	74.6	72.9	71.4	72	73.6	74.2	74.8	76.9	2.92669
138	846	B	14	3	14	16	124.15	141.3	121.741	75.1	74.2	72.6	70.7	68.9	69.4	70.9	71.6	72.2	73.9	2.67633
138	846	B	14	3	18	20	124.19	141.34	121.777	65	64.9	64	62.4	61	62.1	64	64.7	65.3	67	1.62471
138	846	B	14	3	22	24	124.23	141.38	121.814	65.6	65.8	65.3	64.2	63.4	65.2	67.5	68.4	69	70.7	1.68653
138	846	B	14	3	26	28	124.27	141.42	121.85	70.5	70.4	69.2	67.5	66	66.9	68.8	69.3	69.6	71.1	2.1958
138	846	B	14	3	30	32	124.31	141.46	121.887	65.7	65.6	64.6	63.3	62	63.4	65.4	65.9	66.7	67.6	1.6957
138	846	B	14	3	34	36	124.35	141.5	121.923	63.1	63.3	62.8	61.6	60.9	62.8	65.2	66	66.7	67.9	1.42452
138	846	B	14	3	38	40	124.39	141.54	121.959	76.2	76.2	75.1	73.5	71.9	72.6	74.1	74.6	74.9	76.2	2.78707
138	846	B	14	3	42	44	124.43	141.58	121.995	72.8	72.1	70.9	69.6	68.3	69.3	70.9	71.6	72.4	74.3	2.43264
138	846	B	14	3	46	48	124.47	141.62	122.031	79.1	79.4	78.5	76.8	75	75.5	76.8	77.2	77.3	78.7	3.08758
138	846	B	14	3	50	52	124.51	141.66	122.068	71.9	71.3	70.3	68.9	67.7	68.8	70.8	71.5	72.3	74	2.33775
138	846	B	14	3	54	56	124.55	141.7	122.104	68.3	67.9	66.8	65.3	64	65.1	67	67.7	68.3	69.7	1.96251
138	846	B	14	3	58	60	124.59	141.74	122.14	61.5	61.5	61	60.1	59.3	61.4	63.8	64.8	65.8	67.7	1.2543
138	846	B	14	3	62	64	124.63	141.78	122.177	68.4	68	66.8	65.1	63.6	64.5	66.2	66.9	67.5	68.9	1.97167
138	846	B	14	3	66	68	124.67	141.82	122.213	63.6	63.5	62.5	60.8	58.9	59.6	61.5	62.2	62.5	63.7	1.47157
138	846	B	14	3	70	72	124.71	141.86	122.25	66.9	66.9	65.8	64	62.1	62.7	64.5	65.1	65.5	66.8	1.81434
138	846	B	14	3	74	76	124.75	141.9	122.286	63.5	62.8	61.4	59.6	58.1	59	61	61.6	62.2	63.6	1.45993
138	846	B	14	3	78	80	124.79	141.94	122.322	71.5	71	69.6	67.7	65.9	66.5	68.1	68.7	69	70.5	2.29177
138	846	B	14	3	82	84	124.83	141.98	122.358	63.9	63.1	61.7	60.1	58.6	59.7	61.7	62.5	63.2	65	1.50031
138	846	B	14	3	86	88	124.87	142.02	122.394	63.3	63	61.9	60.2	58.5	59.6	61.6	62.3	62.9	64.4	1.43724
138	846	B	14	3	90	92	124.91	142.06	122.431	61.4	61.6	60.5	58.5	56.8	57.8	59.8	60.4	60.8	62.1	1.23891
138	846	B	14	3	94	96	124.95	142.1	122.467	59	59.5	58.4	56.5	54.7	55.7	57.8	58.3	58.6	59.9	0.988549
138	846	B	14	3	98	100	124.99	142.14	122.504	52.8	52.7	51.7	49.9	48.3	49.6	52	52.7	53.1	54.7	0.342766
138	846	B	14	3	102	104	125.03	142.18	122.54	52.7	52.4	51.5	50.3	49.1	50.6	53.1	54	54.5	55.9	0.331737
138	846	B	14	3	106	108	125.07	142.22	122.576	66.7	66.6	65.8	64.6	63.6	65	67.1	67.9	68.5	70.3	1.78793
138	846	B	14	3	110	112	125.11	142.26	122.614	71.1	71.9	71.3	70	68.9	70.2	72.1	72.7	73	74.6	2.24517
138	846	D	14	1	5	7	125.36	142.16	122.625	68.2	69.6	69.3	67.9	66.4	66.8	68.4	68.9	68.8	69.5	2.6716
138	846	B	14	3	114	116	125.15	142.3	122.652	76.7	77.2	76.4	74.9	73.6	74.7	76.2	76.7	77	78.3	2.82727
138	846	D	14	1	9	11	125.4	142.2	122.661	63.5	64.3	64	63	61.8	62.6	64.5	65.1	65.4	65.9	2.13312
138	846	B	14	3	118	120	125.19	142.34	122.691	65.1	65.6	64.9	63.7	62.7	64.3	66.4	67	67.5	69.2	1.61958
138	846	D	14	1	13	15	125.44	142.24	122.696	43.4	45.1	45.1	44.2	43.4	45.1	47.6	48.3	48.6	49.4	-0.165625
138	846	D	14	1	17	19	125.48	142.28	122.728	47.4	49.3	49.2	47.9	46.7	48	50.3	51	51	51.8	0.290343
138	846	D	14	1	21	23	125.52	142.32	122.76	53.7	55.9	56.2	55.6	54.7	56.5	58.7	59.2	59.4	60.2	1.00921
138	846	D	14	1	25	27	125.56	142.36	122.792	52.7	54.8	55.1	54.3	53.6	55.3	57.5	58.2	58.2	59	0.893659
138	846	D	14	1	29	31	125.6	142.4	122.824	53.5	56.1	57	56.6	56.6	59.3	62	62.9	63	64.1	0.983856
138	846	D	14	1	33	35	125.64	142.44	122.856	56.7	58.9	59.1	58.3	57.5	59.1	61.2	61.8	61.7	62.8	1.34838
138	846	D	14	1	37	39	125.68	142.48	122.889	58.8	61.3	61.5	60.6	59.7	60.9	63	63.4	63.3	64.2	1.58717
138	846	D	14	1	41	43	125.72	142.52	122.922	61	63.7	63.9	62.9	61.8	62.8	64.8	65.1	65	65.5	1.83739
138	846	D	14	1	45	47	125.76	142.56	122.956	55.3	56.4	56.5	55.8	55.3	56.8	59.1	59.8	60.3	61	1.18462
138	846	D	14	1	49	51	125.8	142.6	122.99	59.2	60.9	61.1	60.3	59.4	60.7	62.7	63.4	63.4	63.9	1.62915
138	846	D	14	1	53	55	125.84	142.64	123.025	63.4	65.1	65.2	64.1	62.8	63.6	65.3	66	65.7	66.2	2.10798
138	846	D	14	1	57	59	125.88	142.68	123.06	51.2	52	51.6	50.7	49.8	51.1	53.3	54.1	54.4	55.4	0.712232
138	846	D	14	1	61	63	125.92	142.72	123.095	51.4	51.8	51.4	50.4	49.6	50.9	53.2	54	54.5	55.5	0.733846
138	846	D	14	1	65	67	125.96	142.76	123.129	64.2	64.8	64.3	63.3	62.1	62.9	64.7	65.4	65.8	66.7	2.19569
138	846	D	14	1	69	71	126	142.8	123.163	71.9	73.1	72.7	71.5	70.1	70.4	71.9	72.3	72.4	73	3.07458
138	846	D	14	1	73	75	126.04	142.84	123.197	75.3	76.9	76.7	75.7	74.3	74.4	75.8	76.2	75.9	76.7	3.46196
138	846	D	14	1	77	79	126.08	142.88	123.232	77.9	79.9	79.8	78.7	77.2	77.2	78.5	78.8	78.6	79.2	3.75791
138	846	D	14	1	81	83	126.12	142.92	123.267	65.7	67.1	67	66.1	65.2	66.1	67.8	68.6	68.4	69.4	2.36216
138	846	D	14	1	85	87	126.16	142.96	123.302	66.6	67.6	67.2	66	64.8	65.4	67	67.6	67.8	68.5	2.46378
138	846	D	14	1	89	91	126.2	143	123.337	66.1	67.1	66.7	65.7	64.5	65.1	67	67.5	67.6	68.6	2.40538
138	846	D	14	1	93	95	126.24	143.04	123.372	62.5	64.3	64.1	63	61.6	62.4	64.3	64.8	64.7	65.4	1.99264
138	846	D	14	1	97	99	126.28	143.08	123.41	61.6	63.1	62.6	61	59	59.3	61.1	61.3	61.4	61.9	1.88853
138	846	D	14	1	101	103	126.32	143.12	123.447	58.2	60.3	60	58.6	56.8	57.4	59.3	59.7	59.6	60	1.49865
138	846	D	14	1	105	107	126.36	143.16	123.485	54.2	56	55.8	54.4	52.9	53.7	55.7	56.2	56.1	56.7	1.04019
138	846	D	14	1	109	111	126.4	143.2	123.522	54	55.5	55.1	53.6	51.9	52.7	54.7	55	54.8	55.7	1.01608
138	846	D	14	1	113	115	126.44	143.24	123.56	52.6	54.7	54.7	53.5	52.2	53.5	55.5	55.8	55.8	56.4	0.854806
138	846	D	14	1	117	119	126.48	143.28	123.597	52.4	54.1	54.2	53.4	52.6	54	56.4	56.9	57.1	58.2	0.830699
138	846	D	14	1	121	123	126.52	143.32	123.635	50.6	52.1	52.4	51.7	51.1	53	55.5	56.2	56.7	57.4	0.623706
138	846	D	14	1	125	127	126.56	143.36	123.672	50.6	53.2	53.4	52.6	51.6	53.2	55.5	55.9	56	56.3	0.622459
138	846	D	14	1	129	131	126.6	143.4	123.709	44.2	46.8	47.6	47.2	46.9	49.9	52.8	53.7	54.1	54.8	-0.110331
138	846	D	14	1	133	135	126.64	143.44	123.747	50.8	53.1	53.3	52.5	51.7	53.3	55.8	56.1	56	57.2	0.642827
138	846	D	14	1	137	139	126.68	143.48	123.784	63.1	64.9	65.1	64.2	63.4	64.5	66.4	66.9	66.9	67.4	2.04752
138	846	D	14	1	141	143	126.72	143.52	123.822	57.6	59.5	59.5	58.7	57.9	59.4	61.6	62.2	62.2	63.1	1.4176
138	846	D	14	1	145	147	126.76	143.56	123.859	62.1	63.8	63.8	62.9	61.9	63.1	65.2	65.8	65.9	66.8	1.93072
138	846	D	14	2	1	3	126.82	143.62	123.916	58.3	60.8	61.1	60.2	59.3	60.8	63	63.5	63.5	64.4	1.4945
138	846	D	14	2	5	7	126.86	143.66	123.953	58.6	59.8	59.5	58.4	57.3	58.4	60.4	61.1	61.4	62.4	1.52754
138	846	D	14	2	9	11	126.9	143.7	123.991	62.1	64.2	64.1	62.9	61.9	62.9	64.8	65.4	65.6	66	1.92636
138	846	D	14	2	13	15	126.94	143.74	124.028	63.2	65	64.8	63.4	61.7	62.1	63.8	64.3	64.2	64.8	2.05084
138	846	D	14	2	17	19	126.98	143.78	124.066	59.9	61.3	61.4	60.5	59.4	60.6	62.6	63.2	63.6	65	1.6724
138	846	D	14	2	21	23	127.02	143.82	124.103	64.1	65.9	65.7	64.4	62.8	63.2	64.9	65.5	65.2	65.6	2.15122
138	846	D	14	2	25	27	127.06	143.86	124.141	64.2	65.2	64.6	63.1	61.4	61.7	63.3	63.9	63.8	64.2	2.16141
138	846	D	14	2	29	31	127.1	143.9	124.178	63.1	64.7	64.4	63.1	61.6	62	63.7	64.3	64.2	64.5	2.03443
138	846	D	14	2	33	35	127.14	143.94	124.216	65	66.2	65.8	64.7	63.5	64.1	65.8	66.4	66.5	67.3	2.25036
138	846	D	14	2	37	39	127.18	143.98	124.254	70	71.8	71.6	70.1	68.4	68.5	70.1	70.5	70.2	71	2.82063
138	846	D	14	2	41	43	127.22	144.02	124.291	68.6	70.2	69.7	68	66	65.9	67.5	67.9	67.7	68.3	2.65936
138	846	D	14	2	45	47	127.26	144.06	124.329	67.2	68	67.2	65.5	63.6	63.7	65.3	65.8	65.9	66.8	2.49809
138	846	D	14	2	49	51	127.3	144.1	124.367	64.6	66.4	66.4	65.2	63.7	64.5	66.3	66.9	66.9	67.7	2.19965
138	846	D	14	2	53	55	127.34	144.14	124.406	57.8	58.8	58.1	56.4	54.4	54.9	56.8	57.3	57.2	58	1.42114
138	846	D	14	2	57	59	127.38	144.18	124.444	49.4	50	49.3	47.9	46.4	47.3	49.7	50.2	50.4	51.2	0.459742
138	846	D	14	2	61	63	127.42	144.22	124.483	50.7	52.2	51.6	49.7	47.7	48.5	50.6	51.1	51	51.7	0.60709
138	846	D	14	2	65	67	127.46	144.26	124.521	53.8	55	54.5	52.8	50.8	51.7	53.7	54.2	54.3	55	0.960185
138	846	D	14	2	69	71	127.5	144.3	124.56	55.3	56.7	56.1	54.4	52.5	53.2	55.2	55.7	55.7	56.5	1.13039
138	846	D	14	2	73	75	127.54	144.34	124.599	53.4	54.3	53.9	52.6	51.3	52.3	54.5	55.1	55.3	56.2	0.911971
138	846	D	14	2	77	79	127.58	144.38	124.637	57.4	59.6	59.6	58.5	57.4	58.7	60.8	61.3	61.4	62.1	1.36794
138	846	D	14	2	81	83	127.62	144.42	124.675	51.1	53.3	53.9	53.4	53.1	55.5	58.1	59	59.4	60.5	0.646579
138	846	D	14	2	85	87	127.66	144.46	124.714	52.3	54.4	54.7	54	53.4	55.2	57.6	58.3	58.5	59.6	0.782497
138	846	D	14	2	89	91	127.7	144.5	124.752	52.6	55.3	55.8	55.4	55.1	57.5	60	60.8	61.1	61.9	0.815542
138	846	D	14	2	93	95	127.74	144.54	124.79	54.4	56.6	57	56.4	55.8	57.7	60	60.8	60.8	62	1.02004
138	846	D	14	2	97	99	127.78	144.58	124.828	53.1	55.4	55.5	54.7	53.9	55.6	57.9	58.4	58.5	59.4	0.870201
138	846	D	14	2	101	103	127.82	144.62	124.866	48.4	50.8	51.1	50.3	49.5	51.4	53.8	54.3	54.4	55.1	0.331727
138	846	D	14	2	105	107	127.86	144.66	124.904	44.8	47.4	48	47.3	46.7	48.8	51.5	52	52	52.9	-0.0810129
138	846	D	14	2	109	111	127.9	144.7	124.942	42.4	45	45.4	44.8	44.2	46.6	49.4	50	50.1	51.2	-0.356588
138	846	D	14	2	113	115	127.94	144.74	124.979	44.6	46.4	46.3	45.2	44.2	45.9	48.3	48.9	48.8	49.9	-0.106367
138	846	D	14	2	117	119	127.98	144.78	125.017	49.3	51.1	51.2	50.2	49.4	50.9	53.2	53.8	53.7	55.1	0.429614
138	846	D	14	2	121	123	128.02	144.82	125.055	50.6	52.7	52.8	51.8	50.7	52.3	54.6	54.9	55	55.8	0.576962
138	846	D	14	2	125	127	128.06	144.86	125.092	48.3	50.9	51.3	50.3	49.1	50.8	53.1	53.5	53.5	54.2	0.312817
138	846	D	14	2	129	131	128.1	144.9	125.13	48.6	51.2	51.6	50.8	49.9	51.7	54.1	54.5	54.6	55.7	0.345862
138	846	D	14	3	1	3	128.32	145.12	125.317	45.6	46.8	46.7	45.7	44.5	45.9	48.3	48.8	49.4	50.1	-0.00390464
138	846	D	14	3	5	7	128.36	145.16	125.349	46.3	48.3	48.4	47.5	46.4	47.8	50.2	50.9	51	52.2	0.0748614
138	846	D	14	3	9	11	128.4	145.2	125.38	55.4	57.5	57.7	56.9	55.9	57.2	59.5	60.1	60.2	61.2	1.11378
138	846	D	14	3	13	15	128.44	145.24	125.412	62.2	64	64	62.9	61.5	62.2	64	64.6	64.4	65	1.8898
138	846	D	14	3	17	19	128.48	145.28	125.444	66.6	68.5	68	66.3	64.1	63.9	65.2	65.7	65.2	65.7	2.39149
138	846	D	14	3	21	23	128.52	145.32	125.476	59.7	61.6	61.6	60.4	59	59.7	61.5	62.1	62	62.9	1.60154
138	846	D	14	3	25	27	128.56	145.36	125.509	50.9	52.4	52.5	51.8	51	52.7	54.9	55.7	56	57	0.594426
138	846	D	14	3	29	31	128.6	145.4	125.543	44.9	47.2	47.8	47.3	46.8	49.2	51.8	52.8	53.1	54.1	-0.0926427
138	846	D	14	3	33	35	128.64	145.44	125.576	45.5	47.4	47.5	46.7	45.7	47.4	49.8	50.6	50.7	51.5	-0.025307
138	846	D	14	3	37	39	128.68	145.48	125.611	45.2	47.3	47.3	46.4	45.4	46.9	49.3	49.9	49.9	51	-0.0608445
138	846	D	14	3	41	43	128.72	145.52	125.645	42.9	44.8	45	44.4	43.6	45.5	48	48.7	49	50.1	-0.324989
138	846	D	14	3	45	47	128.76	145.56	125.68	48.5	50.7	51	50.2	49.3	50.8	53.2	53.7	53.8	54.5	0.313865
138	846	D	14	3	49	51	128.8	145.6	125.716	46	49	49.8	49.7	49.4	51.7	54.4	55	55.1	56	0.0268589
138	846	D	14	3	53	55	128.84	145.64	125.751	37.2	40.1	41.3	41.5	41.7	44.6	47.7	48.6	48.7	49.8	-0.98026
138	846	D	14	3	57	59	128.88	145.68	125.789	33.8	37	38.2	38.4	38.6	41.7	45	45.7	45.9	47	-1.37014
138	846	D	14	3	61	63	128.92	145.72	125.826	31.4	34.3	35.3	35.4	35.4	38.5	41.6	42.3	42.4	43.4	-1.64571
138	846	D	14	3	65	67	128.96	145.76	125.864	31.5	34.6	35.9	36.2	36.6	40.1	43.5	44.4	44.7	45.7	-1.63553
138	846	D	14	3	69	71	129	145.8	125.901	31.8	34.5	35.7	35.8	36.1	39.4	42.7	43.6	43.9	44.9	-1.60249
138	846	D	14	3	73	75	129.04	145.84	125.939	34.2	36.8	37.8	37.8	37.9	41	44.2	45.1	45.5	46.5	-1.3294
138	846	D	14	3	77	79	129.08	145.88	125.976	32.1	34.7	35.8	35.9	36.2	39.7	43	44	44.3	45.5	-1.57069
138	846	D	14	3	81	83	129.12	145.92	126.014	34	36.4	37.1	36.5	35.8	38.2	41.2	41.8	41.9	42.9	-1.35476
138	846	D	14	3	85	87	129.16	145.96	126.052	36.6	39	39.1	37.9	36.6	38.2	40.9	41.3	41.2	42.2	-1.05881
138	846	D	14	3	89	91	129.2	146	126.09	34.3	36.4	36.6	35.7	34.7	36.8	39.7	40.3	40.3	41.4	-1.32296
138	846	D	14	3	93	95	129.24	146.04	126.128	35.3	37.7	37.9	37	36.1	38.2	41	41.6	41.7	42.6	-1.2099
138	846	D	14	3	97	99	129.28	146.08	126.166	36.1	38.3	38.6	37.6	36.5	38.4	41.1	41.7	41.8	42.8	-1.11971
138	846	D	14	3	101	103	129.32	146.12	126.205	42	44.1	44.1	43	41.8	43.3	45.7	46.2	46.3	47	-0.44656
138	846	D	14	3	105	107	129.36	146.16	126.243	42.2	43.8	43.9	43.1	42.2	44	46.5	47.3	47.5	48.7	-0.424946
138	846	D	14	3	109	111	129.4	146.2	126.282	46	48	48.3	47.4	46.4	48	50.3	51	51.1	52	0.0081615
138	846	D	14	3	113	115	129.44	146.24	126.32	47.7	49.2	49.2	48.2	47.1	48.4	50.7	51.3	51.4	52	0.201231
138	846	D	14	3	117	119	129.48	146.28	126.36	52.8	54.5	54.4	53.3	51.7	52.5	54.4	54.8	54.7	55.2	0.782933
138	846	D	14	3	121	123	129.52	146.32	126.399	51.1	52.7	52.5	51.3	49.8	50.5	52.6	53.2	53.1	53.6	0.587371
138	846	D	14	3	125	127	129.56	146.36	126.438	51.3	52.9	52.7	51.4	49.8	50.5	52.6	53.2	53	53.8	0.608985
138	846	D	14	3	129	131	129.6	146.4	126.477	48.8	49.8	49.5	48.4	47.1	48.1	50.3	51	51	51.8	0.321979
138	846	D	14	3	133	135	129.64	146.44	126.516	47.6	48.4	48.1	47.1	46	47.3	49.7	50.5	50.8	51.5	0.183568
138	846	D	14	3	137	139	129.68	146.48	126.555	43.7	45.4	45.5	44.6	43.6	45.2	47.6	48.5	48.7	49.5	-0.263462
138	846	D	14	3	141	143	129.72	146.52	126.594	43.7	45.3	45.2	44	42.6	44.1	46.6	47.5	47.7	48.3	-0.264709
138	846	D	14	3	145	147	129.76	146.56	126.633	47.9	49.7	49.3	47.4	45.3	46	48.1	48.7	48.8	49.3	0.21412
138	846	D	14	4	1	3	129.82	146.62	126.691	49.3	51.2	50.9	49.4	47.5	48.2	50.2	50.9	50.8	51.4	0.372275
138	846	D	14	4	5	7	129.86	146.66	126.73	51	52.5	52.3	51.3	50.2	51.3	53.4	54.1	54.3	54.9	0.565345
138	846	D	14	4	9	11	129.9	146.7	126.769	46.9	47.3	46.8	45.8	44.7	46	48.2	49.1	49.6	50.5	0.0954536
138	846	D	14	4	13	15	129.94	146.74	126.808	54.2	55.3	55	54	52.9	53.8	55.9	56.6	56.8	57.7	0.928624
138	846	D	14	4	17	19	129.98	146.78	126.847	57.3	58.8	58.6	57.2	55.4	55.8	57.6	58.1	58	58.5	1.28172
138	846	D	14	4	21	23	130.02	146.82	126.886	51.4	53.4	53.8	53.5	53	54.8	57.1	58	58.2	58.8	0.606081
138	846	D	14	4	25	27	130.06	146.86	126.925	50	51.5	51.5	50.7	49.8	51.2	53.6	54.4	54.7	55.4	0.444809
138	846	D	14	4	29	31	130.1	146.9	126.964	50.8	52.4	52.6	52	51.3	52.8	55.1	56	56.3	57.2	0.535005
138	846	D	14	4	33	35	130.14	146.94	127.003	49.8	51.3	51.3	50.2	48.8	49.9	52.1	52.7	52.8	53.4	0.419455
138	846	D	14	4	37	39	130.18	146.98	127.042	46.3	47.3	47	46	44.8	46.2	48.6	49.3	49.5	50.4	0.018146
138	846	D	14	4	41	43	130.22	147.02	127.081	40.6	41.7	41.4	40.4	39.3	40.9	43.5	44.3	44.7	45.6	-0.634631
138	846	D	14	4	45	47	130.26	147.06	127.12	45.1	46.7	46.8	46	45.2	46.8	49.3	50	50.2	51.1	-0.121511
138	846	D	14	4	49	51	130.3	147.1	127.159	40.7	42.2	42.1	41	39.8	41.4	44	44.7	44.8	45.6	-0.625694
138	846	D	14	4	53	55	130.34	147.14	127.198	39.8	42.3	42.6	41.5	40.3	42.1	44.8	45.4	45.3	46.2	-0.729814
138	846	D	14	4	57	59	130.38	147.18	127.237	40	41.9	41.9	40.6	39.2	40.6	43.2	43.8	43.8	44.7	-0.7082
138	846	D	14	4	61	63	130.42	147.22	127.276	42.9	44.4	44.2	43	41.7	42.9	45.3	46	46	46.8	-0.377965
138	846	D	14	4	65	67	130.46	147.26	127.315	47.1	48.1	47.9	47.2	46.5	48	50.4	51.3	51.7	52.6	0.100863
138	846	D	14	4	69	71	130.5	147.3	127.353	51.5	52.7	52.6	52	51.4	53	55.3	56.3	56.4	57.4	0.602553
138	846	D	14	4	73	75	130.54	147.34	127.392	46	46.7	46.4	45.7	45	46.7	49.1	50	50.6	51.6	-0.0273636
138	846	D	14	4	77	79	130.58	147.38	127.431	49.8	51.1	50.9	50	48.8	50	52.1	52.9	53.1	54.1	0.405744
138	846	D	14	4	81	83	130.62	147.42	127.47	57.5	59.5	59.3	57.6	55.6	55.9	57.8	58.2	58.1	58.3	1.28464
138	846	D	14	4	85	87	130.66	147.46	127.509	54.5	57	57.1	55.9	54.6	55.5	57.6	58.3	58.3	58.6	0.940478
138	846	D	14	4	89	91	130.7	147.5	127.548	47.1	47.6	47.3	46.4	45.3	46.5	48.9	49.7	50	50.6	0.0933845
138	846	D	14	4	93	95	130.74	147.54	127.587	48.1	48.8	48.3	46.9	45.3	46.1	48.3	49	49.1	49.8	0.206442
138	846	D	14	4	97	99	130.78	147.58	127.627	45.5	46.5	46.4	45.6	44.7	46.2	48.8	49.6	50.1	50.8	-0.0919944
138	846	D	14	4	101	103	130.82	147.62	127.666	44.1	45.3	45.2	44.1	43	44.3	46.8	47.7	47.8	48.8	-0.253266
138	846	D	14	4	105	107	130.86	147.66	127.705	43.8	44.5	44.3	43.1	42	43.3	45.8	46.6	46.8	47.9	-0.288804
138	846	D	14	4	109	111	130.9	147.7	127.744	48.2	49.8	49.5	48.1	46.6	47.7	49.9	50.7	50.7	51.5	0.212886
138	846	D	14	4	113	115	130.94	147.74	127.783	49.2	50.5	50.3	49.7	48.8	50.2	52.6	53.4	53.8	54.4	0.325943
138	846	D	14	4	117	119	130.98	147.78	127.822	48.4	49.7	49.6	49.1	48.6	50.2	52.8	53.6	54.2	54.7	0.233254
138	846	D	14	4	121	123	131.02	147.82	127.861	52.5	54.1	54	52.9	51.5	52.4	54.4	55.2	55.2	56	0.700652
138	846	D	14	4	125	127	131.06	147.86	127.9	54.1	55.5	55.4	54.6	53.7	54.8	56.9	57.7	58.2	58.9	0.882292
138	846	D	14	4	129	131	131.1	147.9	127.939	56	56.9	56.5	55.4	54.4	55.3	57.3	58	58.2	58.9	1.09822
138	846	D	14	4	133	135	131.14	147.94	127.978	56.5	57.6	57.4	56.9	56.4	57.8	60.1	61.1	61.3	62	1.15413
138	846	D	14	4	137	139	131.18	147.98	128.016	58.2	60.5	60.9	60.4	59.9	61.3	63.4	64.1	64.3	64.8	1.3472
138	846	D	14	4	141	143	131.22	148.02	128.055	56.8	58.2	58.2	57.2	56.2	57.2	59.2	59.7	59.9	60.3	1.18593
138	846	D	14	4	145	147	131.26	148.06	128.095	61.3	63.1	62.9	61.6	60.2	60.7	62.4	62.8	62.7	63.3	1.69905
138	846	D	14	5	1	3	131.32	148.12	128.153	46.8	48.3	48.3	47.9	47.4	49.2	51.7	52.6	53.1	54.2	0.0397727
138	846	D	14	5	5	7	131.36	148.16	128.193	49.9	51.4	51.3	50.6	49.9	51.5	53.8	54.7	54.6	55.7	0.392868
138	846	D	14	5	9	11	131.4	148.2	128.233	52.1	53.8	54.1	53.7	53.3	55.2	57.8	58.5	58.9	59.6	0.643089
138	846	D	14	5	13	15	131.44	148.24	128.272	48.6	50.8	51	50.4	49.7	51.5	54	54.6	54.9	55.6	0.24178
138	846	D	14	5	17	19	131.48	148.28	128.312	45.5	47.2	47.1	46.2	45.3	46.8	49.3	49.9	50.1	50.9	-0.113808
138	846	D	14	5	21	23	131.52	148.32	128.352	46.7	48.9	48.9	47.6	46.3	47.5	49.8	50.1	50.2	50.6	0.0221099
138	846	D	14	5	25	27	131.56	148.36	128.392	43.3	45	44.7	43.4	42	43.3	45.6	46.2	46.1	47	-0.367769
138	846	D	14	5	29	31	131.6	148.4	128.433	39.8	41.6	41.6	40.4	39.2	41	43.6	44.3	44.3	45.1	-0.769078
138	846	D	14	5	33	35	131.64	148.44	128.473	42.5	44.4	44	42.5	40.9	42.2	44.6	45.1	45	45.8	-0.461705
138	846	D	14	5	37	39	131.68	148.48	128.514	43.2	44.8	44.3	42.9	41.3	42.5	44.8	45.4	45.3	45.9	-0.382939
138	846	D	14	5	41	43	131.72	148.52	128.554	43.8	44.8	44.3	43	41.7	42.9	45.3	45.9	46	46.8	-0.315603
138	846	D	14	5	45	47	131.76	148.56	128.594	47	48.5	47.9	46.1	44.1	44.8	46.9	47.4	47.2	47.7	0.048922
138	846	D	14	5	49	51	131.8	148.6	128.634	45.6	47.2	46.9	45.4	43.8	44.8	47.1	47.7	47.6	48.2	-0.11235
138	846	D	14	5	53	55	131.84	148.64	128.675	45.8	47.4	47.3	46	44.7	45.8	48.2	48.8	48.8	49.4	-0.0907353
138	846	D	14	5	57	59	131.88	148.68	128.715	43	43.9	43.8	42.9	41.9	43.4	45.9	46.7	47.1	48	-0.412032
138	846	D	14	5	61	63	131.92	148.72	128.756	47.1	48.4	48.2	46.9	45.2	46.1	48.3	49	49	49.6	0.0553664
138	846	D	14	5	65	67	131.96	148.76	128.797	49.1	51	50.7	49.2	47.4	48	50.3	50.8	50.9	51.5	0.282727
138	846	D	14	5	69	71	132	148.8	128.837	50.4	51.6	51.2	49.9	48.3	49	51.3	51.9	51.9	52.5	0.430076
138	846	D	14	5	73	75	132.04	148.84	128.878	47.9	50.2	50.6	49.6	48.7	50.4	52.9	53.6	53.6	54.4	0.14307
138	846	D	14	5	77	79	132.08	148.88	128.918	51.1	52.9	52.6	51.2	49.4	50.2	52.3	52.8	52.9	53.2	0.507595
138	846	D	14	5	81	83	132.12	148.92	128.959	47	47.6	47.1	46.1	44.9	46.2	48.5	49.3	49.6	50.3	0.0377036
138	846	D	14	5	85	87	132.16	148.96	128.999	47.2	48.9	49	48.3	47.8	49.5	52.1	53	53.1	54.4	0.0593178
138	846	D	14	5	89	91	132.2	149	129.04	47.5	49.7	49.9	49	47.9	49.3	51.7	52.3	52.3	52.8	0.0923624
138	846	D	14	5	93	95	132.24	149.04	129.08	43.7	45	45.1	44.6	44	45.8	48.5	49.4	49.8	50.6	-0.343238
138	846	D	14	5	97	99	132.28	149.08	129.12	49.8	51.4	51.4	50.4	49.4	50.6	52.9	53.7	53.5	54.2	0.352768
138	846	D	14	5	101	103	132.32	149.12	129.16	48	50.4	50.6	49.7	48.8	50.3	52.8	53.4	53.3	54	0.145775
138	846	D	14	5	105	107	132.36	149.16	129.201	42.2	43.5	43.3	42.5	41.8	43.6	46.2	47.1	47.4	48.2	-0.518433
138	846	D	14	5	109	111	132.4	149.2	129.241	42.2	43.1	43.1	42.4	41.9	43.8	46.5	47.3	47.7	48.4	-0.519679
138	846	D	14	5	113	115	132.44	149.24	129.281	50	52.5	52.7	51.6	50.3	51.3	53.6	54	53.8	54.4	0.370643
138	846	D	14	5	117	119	132.48	149.28	129.322	53.5	56.2	56.3	55	53.5	54.3	56.4	56.7	56.5	56.9	0.769459
138	846	D	14	5	121	123	132.52	149.32	129.362	55.6	57.9	58	57	55.8	56.8	58.8	59.3	59	59.5	1.00825
138	846	D	14	5	125	127	132.56	149.36	129.403	53.9	55.3	55.4	54.9	54.1	55.5	57.7	58.3	58.5	59.3	0.812687
138	846	D	14	5	129	131	132.6	149.4	129.443	52.6	54.1	54.4	53.9	53.2	54.5	56.7	57.4	57.5	58	0.662846
138	846	D	14	5	133	135	132.64	149.44	129.484	52.2	52.9	52.6	51.8	50.7	51.9	54.1	54.7	55	55.8	0.615878
138	846	D	14	5	137	139	132.68	149.48	129.524	49.5	50.8	50.9	50.3	49.4	50.8	53.1	54	54.1	55	0.306012
138	846	D	14	5	141	143	132.72	149.52	129.565	46.4	47.6	47.5	46.7	45.7	47	49.4	50.2	50.3	51.2	-0.049576
138	846	D	14	5	145	147	132.76	149.56	129.605	47.1	48.4	48.2	46.9	45.3	46.4	48.7	49.4	49.4	50.2	0.0291901
138	846	D	14	6	1	3	132.82	149.62	129.666	41.1	41.9	41.7	40.6	39.3	41.4	45.1	46.2	46.2	46.9	-0.658502
138	846	D	14	6	5	7	132.86	149.66	129.706	42.4	43.4	43	41.7	40.1	41.3	43.7	44.3	44.4	45.7	-0.511153
138	846	D	14	6	9	11	132.9	149.7	129.747	43	44	43.7	42.3	40.8	42.1	44.5	45.1	45.1	46.4	-0.443818
138	846	D	14	6	13	15	132.94	149.74	129.787	41.9	43.8	44.1	43.3	42.4	44.4	47.2	48.1	48.3	49.3	-0.570798
138	846	D	14	6	17	19	132.98	149.78	129.828	43.2	44.8	44.8	43.8	42.7	44.3	46.8	47.6	47.6	48.4	-0.42345
138	846	D	14	6	21	23	133.02	149.82	129.868	42.6	44.3	44.5	43.7	42.7	44.4	47.1	47.8	47.8	49	-0.493279
138	846	D	14	6	25	27	133.06	149.86	129.909	47.8	49.3	49.2	48	46.5	47.4	49.7	50.6	50.4	50.9	0.0998539
138	846	D	14	6	29	31	133.1	149.9	129.949	48.9	50	49.8	48.9	47.9	49.1	51.3	52.1	52.3	53.1	0.224341
138	846	D	14	6	33	35	133.14	149.94	129.989	54.5	55.8	55.6	54.5	53	53.6	55.5	56.2	56.2	56.6	0.863195
138	846	D	14	6	37	39	133.18	149.98	130.03	56.9	58.5	58.3	57	55.5	56.1	58	58.5	58.4	59.1	1.13628
138	846	D	14	6	41	43	133.22	150.02	130.07	54.8	55.8	55.7	55.1	54.3	55.4	57.5	58.3	58.4	59.3	0.894994
138	846	D	14	6	45	47	133.26	150.06	130.111	53.3	54.5	54.5	53.9	53.2	54.6	56.8	57.6	57.7	58.8	0.722292
138	846	D	14	6	49	51	133.3	150.1	130.151	52.8	55.1	55.3	54	52.2	52.7	54.8	55.4	55.3	55.5	0.663893
138	846	D	14	6	53	55	133.34	150.14	130.192	43.9	44.8	44.3	43.3	42.2	43.6	46	46.6	46.8	48	-0.354656
138	846	D	14	6	57	59	133.38	150.18	130.232	42.6	43.6	43.5	42.8	42.1	43.7	46.4	47.1	47.3	48.3	-0.504497
138	846	D	14	6	61	63	133.42	150.22	130.273	45.6	47.2	47.1	46.1	44.9	46.3	48.7	49.5	49.6	49.9	-0.162833
138	846	D	14	6	65	67	133.46	150.26	130.313	40	40.7	40.5	39.6	38.8	40.5	43.1	44	44.3	45.4	-0.80418
138	846	D	14	6	69	71	133.5	150.3	130.353	39.8	41.1	40.8	39.7	38.8	40.5	43.2	43.8	43.9	44.7	-0.828287
138	846	D	14	6	73	75	133.54	150.34	130.393	38.4	40	39.9	38.9	37.9	39.6	42.3	42.8	42.9	44	-0.989558
138	846	D	14	6	77	79	133.58	150.38	130.433	35.3	37.2	37.3	36.3	35.3	37.2	39.9	40.7	40.8	41.9	-1.34515
138	846	D	14	6	81	83	133.62	150.42	130.473	30.7	32.6	32.7	31.8	31	33.1	36.1	36.9	37.1	38.3	-1.87219
138	846	D	14	6	85	87	133.66	150.46	130.513	27.9	29.5	29.3	28.3	27.3	29.4	32.5	33.2	33.5	34.5	-2.19349
138	846	D	14	6	89	91	133.7	150.5	130.553	37.7	39.7	40.1	39.5	38.8	41	43.8	44.6	44.6	45.6	-1.07456
138	846	D	14	6	93	95	133.74	150.54	130.593	28	29.1	29	28.2	27.4	29.6	32.7	33.5	33.9	34.9	-2.18455
138	846	D	14	6	97	99	133.78	150.58	130.632	31.5	32.6	32.7	32	31.3	33.6	36.7	37.5	38.1	39.4	-1.78573
138	846	D	14	6	101	103	133.82	150.62	130.672	39.2	40.2	40.1	39.3	38.2	39.7	42.4	43.3	43.5	44.2	-0.906841
138	846	D	14	6	105	107	133.86	150.66	130.712	44.5	45.3	45.1	44.2	43	44.2	46.6	47.3	47.4	48.5	-0.302278
138	846	D	14	6	109	111	133.9	150.7	130.751	47.1	48.5	48.4	47.2	45.6	46.7	49	49.7	49.7	50.3	-0.006335
138	846	D	14	6	113	115	133.94	150.74	130.79	42.7	43.9	43.7	42.9	42	43.7	46.2	47	47.2	48.5	-0.510518
138	846	B	15	1	45	47	130.96	150.66	130.795	50.9	51	50.3	48.8	47.1	48.3	50.5	51.4	52.1	53.9	0.012543
138	846	D	14	6	117	119	133.98	150.78	130.825	45.2	46.6	46.1	44.2	42	42.5	44.8	45.4	45.3	45.9	-0.226005
138	846	B	15	1	49	51	131	150.7	130.836	50.9	51.5	50.8	49	47.1	48	50.4	51.2	51.8	53.2	0.0119207
138	846	D	14	6	121	123	134.02	150.82	130.861	48	49.8	49.2	47.2	44.7	45	47.1	47.6	47.3	47.7	0.0927988
138	846	B	15	1	53	55	131.04	150.74	130.876	50.5	50.4	49.3	47.5	45.6	46.5	48.8	49.6	49.9	50.9	-0.0303249
138	846	B	15	1	57	59	131.08	150.78	130.914	51.9	52.3	50.9	48.4	45.9	46.3	48.4	49.3	49.7	50.3	0.114735
138	846	B	15	1	61	63	131.12	150.82	130.95	49.6	49.9	48.7	46.4	44.1	44.9	47.1	47.8	48.3	49.7	-0.125222
138	846	B	15	1	65	67	131.16	150.86	130.985	48.7	48.7	47.6	45.7	43.7	44.5	46.9	47.8	48.1	49.4	-0.219496
138	846	B	15	1	69	71	131.2	150.9	131.02	47.5	47	46.1	44.1	42.2	43.1	45.5	46.1	47	47.9	-0.344988
138	846	B	15	1	73	75	131.24	150.94	131.055	49.4	49.2	47.7	45.5	43.2	43.8	46	46.9	47.1	48.6	-0.147899
138	846	B	15	1	77	79	131.28	150.98	131.09	51.6	51.5	49.8	47.2	44.4	44.8	47.1	47.7	47.8	49.4	0.080407
138	846	B	15	1	81	83	131.32	151.02	131.125	46.1	45.4	44.2	42.4	40.8	42.2	44.6	45.7	46.1	48	-0.492536
138	846	B	15	1	85	87	131.36	151.06	131.161	51.9	52	50.9	48.7	46.7	47.5	49.4	50.6	50.5	51.8	0.11038
138	846	B	15	1	89	91	131.4	151.1	131.196	54.1	54	53.2	51.4	49.4	50.4	52.8	53.5	53.5	55.3	0.338687
138	846	B	15	1	93	95	131.44	151.14	131.231	54.9	55.2	54.1	52.3	50.7	51.7	53.9	54.7	55	56.6	0.421311
138	846	B	15	1	97	99	131.48	151.18	131.266	52.5	53.1	52.1	50.8	49.4	50.9	53.3	54.4	54.6	56.3	0.170949
138	846	B	15	1	101	103	131.52	151.22	131.301	54.4	54.9	53.9	52.4	50.6	51.8	53.9	54.9	54.9	56.8	0.368038
138	846	B	15	1	105	107	131.56	151.26	131.337	55.9	56	55.2	53.2	51.4	52.3	54.2	55.1	55.2	56.1	0.523503
138	846	B	15	1	109	111	131.6	151.3	131.372	48.6	48.8	48.3	47.2	46.1	48	50.6	51.6	52	53.3	-0.236744
138	846	B	15	1	113	115	131.64	151.34	131.407	50.1	50.5	49.8	48.5	47.1	48.7	51.2	51.8	52.4	54	-0.0812787
138	846	B	15	1	117	119	131.68	151.38	131.442	50.2	49.7	48.7	47.3	46	47.6	50.1	50.8	51.4	53.2	-0.0714955
138	846	B	15	1	121	123	131.72	151.42	131.477	44.2	44.6	44.1	43	42.1	44.2	47	48	48.6	50.4	-0.696467
138	846	B	15	1	125	127	131.76	151.46	131.513	46.5	47.1	46.9	45.7	44.7	46.7	49.4	50.3	51	52.2	-0.457755
138	846	B	15	1	129	131	131.8	151.5	131.548	43	43.2	42.3	40.7	39.1	40.8	43.4	44.1	44.7	46.1	-0.822582
138	846	B	15	1	133	135	131.84	151.54	131.584	42.4	42.6	41.6	39.9	38.4	40.1	42.8	43.4	43.6	45.7	-0.885639
138	846	B	15	1	137	139	131.88	151.58	131.618	43.9	44.2	43.3	41.6	40.2	41.8	44.6	45.2	45.7	47.4	-0.730173
138	846	B	15	1	141	143	131.92	151.62	131.653	44.2	44.3	43.6	42	40.4	42.1	44.6	45.5	45.8	47.7	-0.699578
138	846	B	15	1	145	147	131.96	151.66	131.689	46.1	46.4	45.7	44.3	43.1	44.8	47.5	48.2	48.9	50.4	-0.50249
138	846	B	15	2	1	3	132.02	151.72	131.742	49.9	51	50.2	48.4	46.7	48	50.4	51.2	51	52.7	-0.108001
138	846	B	15	2	5	7	132.06	151.76	131.776	46.7	47.6	47.1	45.7	44.5	46.2	48.8	49.6	49.8	51.7	-0.44161
138	846	B	15	2	9	11	132.1	151.8	131.812	44.7	45.4	44.8	43.8	43	45.1	47.9	48.9	49.5	51.4	-0.650348
138	846	B	15	2	13	15	132.14	151.84	131.847	47.1	48.1	47.9	47	46.1	48.4	51.2	52.1	52.9	54.2	-0.401231
138	846	B	15	2	17	19	132.18	151.88	131.882	49.5	49.8	48.7	47.5	46.4	48.2	50.6	51.4	52	53.9	-0.152113
138	846	B	15	2	21	23	132.22	151.92	131.918	49.6	50.2	49.8	48.8	48	50.1	52.8	53.7	54.3	55.7	-0.142329
138	846	B	15	2	25	27	132.26	151.96	131.953	50.3	50.6	50	49.1	48.2	50.2	52.9	53.9	54.7	56.5	-0.07011
138	846	B	15	2	29	31	132.3	152	131.987	56.3	56.6	55.8	54.4	53.2	54.5	56.8	57.7	58.2	59.3	0.553617
138	846	B	15	2	33	35	132.34	152.04	132.023	48.6	49.1	48.6	47.5	46.7	48.7	51.3	52.2	52.9	54.4	-0.248253
138	846	B	15	2	37	39	132.38	152.08	132.058	46.6	45.9	45.2	44.1	43.3	45.3	48.1	49.1	50.1	52.1	-0.456992
138	846	B	15	2	41	43	132.42	152.12	132.094	52	52.4	51.8	50.8	49.6	51.3	53.8	54.7	55	56.5	0.1043
138	846	B	15	2	45	47	132.46	152.16	132.129	53.1	53.4	52.8	51.4	50	51.2	53.6	54.5	55	56.3	0.218142
138	846	B	15	2	49	51	132.5	152.2	132.163	49.9	50.4	50	49	48.2	50.2	53	54.1	54.8	55.9	-0.115467
138	846	B	15	2	53	55	132.54	152.24	132.199	50.4	49.5	48.6	47.5	46.5	48.3	50.9	51.9	52.8	54.1	-0.0640593
138	846	B	15	2	57	59	132.58	152.28	132.234	50.4	50.8	49.6	47.7	45.7	46.8	49.1	49.8	50.3	51.9	-0.0646815
138	846	B	15	2	61	63	132.62	152.32	132.27	56.3	56.4	55.1	53.1	51.2	51.9	54	54.6	54.8	55.8	0.54864
138	846	B	15	2	65	67	132.66	152.36	132.305	56.3	56.1	55.1	53.5	52	53.3	55.6	56.4	57.1	59	0.548018
138	846	D	15	1	1	3	134.82	152.82	132.325	50.3	51.2	51	50.1	49	50.2	52.5	53.3	53.6	54.2	0.293373
138	846	B	15	2	69	71	132.7	152.4	132.338	56.4	57.4	56.3	54.2	52.4	53.1	55.1	55.8	55.8	57.3	0.557801
138	846	B	15	2	73	75	132.74	152.44	132.37	55.6	56.5	55.7	53.9	52	52.9	55.2	55.7	55.9	57.1	0.473934
138	846	D	15	1	7	9	134.88	152.88	132.377	52.7	53.8	53.5	52.5	51.1	52.1	54.3	55	55.1	55.8	0.565832
138	846	D	15	1	13	15	134.94	152.94	132.429	62.4	64.7	64.2	62.1	59.6	59.5	61	61.5	61.2	61.5	1.67271
138	846	D	15	1	19	21	135	153	132.481	53.2	54.6	54.3	53	51.5	52.4	54.5	55.2	55.4	55.9	0.619244
138	846	D	15	1	25	27	135.06	153.06	132.532	54.9	55.7	55.2	54.2	52.9	53.9	56	56.6	56.6	57.1	0.81169
138	846	D	15	1	31	33	135.12	153.12	132.582	45.9	47.1	47.3	46.5	45.7	47.3	49.7	50.5	50.9	52.1	-0.218912
138	846	D	15	1	37	39	135.18	153.18	132.631	46	47.9	47.9	46.9	45.7	47.1	49.5	50.1	50.1	51	-0.209352
138	846	D	15	1	43	45	135.24	153.24	132.679	44	45.4	45.1	43.6	42	43.2	45.6	46.1	46.1	47.1	-0.439829
138	846	D	15	1	49	51	135.3	153.3	132.727	50.6	53	53.5	52.8	52	53.8	56.2	57	56.9	57.6	0.312706
138	846	D	15	1	55	57	135.36	153.36	132.775	34.6	35.7	35	33.1	31.4	32.7	35.3	35.9	36.3	37.3	-1.51802
138	846	D	15	1	61	63	135.42	153.42	132.822	36.1	37.7	37.5	36.3	35	36.7	39.4	40.1	40.4	41.3	-1.34844
138	846	D	15	1	67	69	135.48	153.48	132.872	45.4	46.7	46.4	45	43.4	44.5	46.8	47.5	47.5	48.2	-0.287283
138	846	D	15	1	73	75	135.54	153.54	132.923	48.3	49.6	49.3	48.1	46.7	47.7	49.9	50.5	50.8	51.9	0.0423284
138	846	D	15	1	79	81	135.6	153.6	132.975	47.4	49.4	49.4	48.1	46.6	47.7	50	50.6	50.7	51.5	-0.0624147
138	846	D	15	1	85	87	135.66	153.66	133.027	42.3	43.9	43.9	43.1	42.2	44	46.6	47.4	47.6	48.5	-0.647233
138	846	D	15	1	91	93	135.72	153.72	133.079	44.1	45.7	45.5	44.4	43.3	44.7	47.1	47.8	47.9	48.8	-0.443356
138	846	D	15	1	97	99	135.78	153.78	133.131	46.5	47.4	47	45.9	44.5	45.7	47.9	48.6	48.6	49.6	-0.170897
138	846	D	15	1	103	105	135.84	153.84	133.184	51.3	52.5	52.2	50.8	49.2	49.9	51.9	52.5	52.5	53	0.375891
138	846	D	15	1	109	111	135.9	153.9	133.235	49.4	50.3	49.8	48.4	46.7	47.4	49.5	50	50.1	51.1	0.156844
138	846	D	15	1	115	117	135.96	153.96	133.287	38.7	39.2	38.7	37.7	36.6	38.1	40.8	41.5	42	43.1	-1.06808
138	846	D	15	1	121	123	136.02	154.02	133.339	38	39.9	40.4	39.9	39.4	41.7	44.6	45.5	45.7	46.6	-1.14996
138	846	D	15	1	127	129	136.08	154.08	133.392	38.4	39	38.6	37.8	37	38.8	41.4	42.2	42.6	43.9	-1.10611
138	846	D	15	1	133	135	136.14	154.14	133.446	41.9	43.1	42.9	41.8	40.7	42.2	44.8	45.6	45.6	46.5	-0.707913
138	846	D	15	1	139	141	136.2	154.2	133.502	39.1	39.5	39.2	38.3	37.7	39.5	42.2	43	43.6	44.9	-1.02983
138	846	D	15	1	145	147	136.26	154.26	133.558	38.6	39.8	39.8	38.9	38	39.8	42.5	43.4	43.6	44.4	-1.08885
138	846	D	15	2	1	3	136.32	154.32	133.615	39.6	40.9	40.9	39.8	38.8	40.5	43.2	44	44.4	45.4	-0.97642
138	846	D	15	2	7	9	136.38	154.38	133.671	42.3	43.4	43	41.6	40	41.2	43.6	44.2	44.4	45.1	-0.66967
138	846	D	15	2	13	15	136.44	154.44	133.727	42.8	43.7	43.1	41.7	40.1	41.3	43.7	44.3	44.4	45.3	-0.614388
138	846	D	15	2	19	21	136.5	154.5	133.783	40.4	40.5	39.9	39	38.2	40	42.6	43.3	44	44.8	-0.890586
138	846	D	15	2	25	27	136.56	154.56	133.84	44.9	46	45.4	44	42.6	43.7	46.1	46.7	46.6	47.5	-0.37809
138	846	D	15	2	31	33	136.62	154.62	133.896	45.2	46.2	45.6	44.2	42.9	44	46.2	46.9	47.1	47.7	-0.345668
138	846	D	15	2	37	39	136.68	154.68	133.952	48	50.3	50	48.6	47	47.9	50	50.6	50.5	50.9	-0.0274878
138	846	D	15	2	43	45	136.74	154.74	134.009	48.3	50	50.1	49.2	47.9	49.1	51.4	52.1	52.2	52.8	0.00493355
138	846	D	15	2	49	51	136.8	154.8	134.064	47.7	50	50.4	49.8	49.2	50.8	53.2	53.8	53.9	54.8	-0.0655184
138	846	D	15	2	55	57	136.86	154.86	134.117	45.9	48.3	49.1	48.9	48.6	50.7	53.4	54.1	54.3	55.2	-0.273135
138	846	D	15	2	61	63	136.92	154.92	134.169	36.1	38.2	39.2	39.5	39.9	43	46.2	47.5	48.1	49.5	-1.39518
138	846	D	15	2	67	69	136.98	154.98	134.217	34	36.7	37.9	38.4	39.2	43.1	46.7	48.1	48.8	49.9	-1.63709
138	846	D	15	2	73	75	137.04	155.04	134.265	35.6	38.1	39.2	39.3	39.7	42.7	45.8	46.9	47.5	48.5	-1.45607
138	846	D	15	2	79	81	137.1	155.1	134.313	35.9	38.6	39.6	39.8	40.1	43.2	46.5	47.4	47.9	49	-1.42365
138	846	D	15	2	85	87	137.16	155.16	134.361	37.7	40.2	41	40.7	40.5	42.9	45.8	46.8	47.2	48.1	-1.21977
138	846	D	15	2	91	93	137.22	155.22	134.409	40.2	43.6	44.6	44.3	43.9	46.3	49.3	50	49.9	50.4	-0.935884
138	846	D	15	2	97	99	137.28	155.28	134.457	36	39	40.2	40.3	40.5	43.7	46.9	47.9	48.3	49.2	-1.41783
138	846	D	15	2	103	105	137.34	155.34	134.505	37	40.4	41.8	42.1	42.5	45.6	48.8	49.6	49.7	51	-1.3054
138	846	D	15	2	109	111	137.4	155.4	134.553	32.8	35.4	36.7	37.2	37.9	41.5	45	46.2	46.7	48.2	-1.78734
138	846	D	15	2	115	117	137.46	155.46	134.601	38.3	41.3	42.3	42.2	42.3	45.2	48.3	49.1	49.2	50.1	-1.16054
138	846	D	15	2	121	123	137.52	155.52	134.649	33.7	36	36.7	36.6	36.6	39.3	42.5	43.4	43.8	44.6	-1.68821
138	846	D	15	2	127	129	137.58	155.58	134.697	35.1	38	39	39	39	41.8	44.8	45.7	46.2	47.4	-1.53005
138	846	D	15	2	133	135	137.64	155.64	134.745	36.3	39.7	40.9	41.2	41.5	44.5	47.7	48.6	49.1	50	-1.39476
138	846	D	15	2	139	141	137.7	155.7	134.793	36.3	39.4	40.8	41.3	41.8	45	48.3	49.3	49.5	50.5	-1.39663
138	846	D	15	2	145	147	137.76	155.76	134.841	36.2	39.1	40.5	41.1	41.6	45	48.3	49.4	50	51.3	-1.40993
138	846	D	15	3	1	3	137.82	155.82	134.889	35.5	38.6	40.2	40.9	41.7	45.4	48.9	50	50.6	51.8	-1.49181
138	846	D	15	3	7	9	137.88	155.88	134.937	32.8	36.1	37.9	38.7	39.8	44.2	48.1	49.5	50.1	51.3	-1.8023
138	846	D	15	3	13	15	137.94	155.94	134.985	29.2	31.9	33.6	34.3	35.5	40.7	45	46.8	48	49.3	-2.21566
138	846	D	15	3	19	21	138	156	135.033	29.3	32.2	33.9	34.8	36.1	41.5	46	47.9	49	50.3	-2.2061
138	846	D	15	3	25	27	138.06	156.06	135.081	32.4	34.9	36.1	36.6	37.2	40.8	44.3	45.5	46.1	47.3	-1.85363
138	846	D	15	3	31	33	138.12	156.12	135.129	31.7	34.6	35.9	36.5	37.3	41.3	44.9	46.1	46.7	48.1	-1.93551
138	846	D	15	3	37	39	138.18	156.18	135.177	30.4	33.1	34.5	35	35.9	40.1	44	45.2	45.9	47.4	-2.08598
138	846	D	15	3	43	45	138.24	156.24	135.225	30.6	33	34	34.4	34.9	38.4	42	43.1	43.6	44.9	-2.06498
138	846	D	15	3	49	51	138.3	156.3	135.273	30.7	33.4	34.7	35.2	35.9	39.8	43.4	44.5	45	46.3	-2.05542
138	846	D	15	3	55	57	138.36	156.36	135.32	30.2	32.9	34.1	34.5	35.1	38.6	42.1	43.2	43.7	44.9	-2.11445
138	846	D	15	3	61	63	138.42	156.42	135.368	29.4	32.1	33.4	33.9	34.7	39	42.9	44.3	45.1	46.5	-2.20776
138	846	D	15	3	67	69	138.48	156.48	135.416	37.2	40.3	41.3	41.2	41.2	43.8	46.9	47.7	47.8	48.6	-1.31806
138	846	D	15	3	73	75	138.54	156.54	135.464	41.2	44.4	45.2	44.7	44.2	46.3	49.1	49.7	49.6	50.3	-0.862715
138	846	D	15	3	79	81	138.6	156.6	135.512	39.1	41.9	42.5	41.7	40.8	42.6	45.3	45.8	45.6	46.4	-1.10462
138	846	D	15	3	85	87	138.66	156.66	135.56	38.4	40.9	41.4	41	40.5	42.6	45.4	46.1	46.2	47	-1.1865
138	846	D	15	3	91	93	138.72	156.72	135.608	35.5	38.1	39	39	39.2	42.2	45.4	46.3	46.7	47.6	-1.51985
138	846	D	15	3	97	99	138.78	156.78	135.657	42.5	44.9	45.3	44.7	43.9	45.6	48.3	48.9	48.9	49.6	-0.721599
138	846	D	15	3	103	105	138.84	156.84	135.706	42.4	44.2	44.3	43.3	42.1	43.6	46.1	46.7	46.6	47.3	-0.734899
138	846	D	15	3	109	111	138.9	156.9	135.758	37.4	38.9	38.9	38.2	37.4	39.3	42	42.8	43	44.2	-1.30829
138	846	D	15	3	115	117	138.96	156.96	135.811	38.1	40.3	40.4	39.4	38.4	40.1	42.8	43.5	43.6	44.4	-1.23014
138	846	D	15	3	121	123	139.02	157.02	135.863	33.5	34.4	34.2	33.6	33.1	35.3	38.3	39.2	39.7	40.8	-1.75781
138	846	D	15	3	127	129	139.08	157.08	135.915	37	38	38.2	37.7	37.2	39.2	42.1	43	43.4	44.5	-1.35962
138	846	D	15	3	133	135	139.14	157.14	135.967	42	44.7	44.9	44	43.2	45	47.6	48.4	48.5	49.1	-0.789969
138	846	D	15	3	139	141	139.2	157.2	136.021	35.9	37.6	38.2	38.1	38.2	40.8	44	45.1	45.6	46.8	-1.48909
138	846	D	15	3	145	147	139.26	157.26	136.076	49	51.1	51.2	50.2	49	50.1	52.5	53.1	53	53.8	0.00641702
138	846	D	15	4	1	3	139.32	157.32	136.133	51.3	52.6	52.4	51.2	49.8	50.7	52.9	53.5	53.5	54	0.267446
138	846	D	15	4	7	9	139.38	157.38	136.189	48.9	51.6	52	51.4	50.7	52.2	54.7	55.1	55.2	55.8	-0.00875283
138	846	D	15	4	13	15	139.44	157.44	136.245	41.6	43.2	43.6	43.4	43.2	45.5	48.4	49.2	49.7	50.5	-0.845039
138	846	D	15	4	19	21	139.5	157.5	136.301	42.9	44.9	45.4	45	44.7	46.8	49.5	50.2	50.3	51.5	-0.698314
138	846	D	15	4	25	27	139.56	157.56	136.355	43.2	45	45.3	44.8	44.2	46.1	48.8	49.5	49.6	50.3	-0.665893
138	846	D	15	4	31	33	139.62	157.62	136.406	43.7	45.6	45.7	44.8	43.8	45.4	48	48.6	48.6	49.3	-0.610611
138	846	D	15	4	37	39	139.68	157.68	136.454	35.8	37.4	37.5	36.7	36	37.9	40.8	41.5	41.8	42.8	-1.51548
138	846	D	15	4	43	45	139.74	157.74	136.502	31.8	32.8	32.7	32	31.3	33.5	36.5	37.4	37.9	39.3	-1.97456
138	846	D	15	4	49	51	139.8	157.8	136.55	30.1	31.3	31.2	30.3	29.5	31.5	34.5	35.3	35.7	36.9	-2.17075
138	846	D	15	4	55	57	139.86	157.86	136.598	29.5	30.2	29.9	29	28.2	30.2	33.3	34.2	34.6	35.7	-2.2412
138	846	D	15	4	61	63	139.92	157.92	136.646	33.2	34.4	34.2	33.2	32.2	34.1	36.9	37.7	38	39	-1.82015
138	846	D	15	4	67	69	139.98	157.98	136.694	37.1	38.3	38.2	37.6	37	39.1	41.9	42.8	43.1	44.4	-1.37623
138	846	D	15	4	73	75	140.04	158.04	136.742	45.6	47.3	47.4	46.9	46.3	48	50.6	51.4	51.4	52.5	-0.406522
138	846	D	15	4	79	81	140.1	158.1	136.79	42.1	42.7	42.7	42.3	42	44.1	46.8	47.8	48.6	49.9	-0.808455
138	846	D	15	4	85	87	140.16	158.16	136.838	47.8	48.9	49.2	49.2	49.2	51.4	54	55	55.5	56.5	-0.158793
138	846	D	15	4	91	93	140.22	158.22	136.886	52.6	54.4	54.9	54.5	54	55.7	58.1	59	59.2	60.1	0.387994
138	846	D	15	4	97	99	140.28	158.28	136.934	54.7	56.3	56.8	56.7	56.2	57.6	59.9	60.6	60.7	61.4	0.626162
138	846	D	15	4	103	105	140.34	158.34	136.983	52.1	52.9	52.7	52	51.2	52.4	54.6	55.3	55.3	56	0.327103
138	846	D	15	4	109	111	140.4	158.4	137.033	50.4	51.3	51.3	50.6	49.9	51.3	53.6	54.3	54.5	55.2	0.130917
138	846	D	15	4	115	117	140.46	158.46	137.085	47.9	49.3	49.5	49	48.5	50.3	52.8	53.7	54	54.7	-0.156712
138	846	D	15	4	121	123	140.52	158.52	137.137	44.3	45.3	45.1	44.6	44.1	45.9	48.4	49.2	49.5	50.8	-0.570075
138	846	D	15	4	127	129	140.58	158.58	137.188	46.6	48	47.8	46.7	45.5	46.7	49	49.7	49.7	50.6	-0.309046
138	846	D	15	4	133	135	140.64	158.64	137.238	41.1	42.4	42.2	41.5	40.8	42.7	45.4	46.3	46.5	47.4	-0.939586
138	846	D	15	4	139	141	140.7	158.7	137.287	49.2	50.4	50	48.7	47.2	48.2	50.4	50.9	50.9	51.5	-0.015596
138	846	D	15	4	145	147	140.76	158.76	137.335	41.2	42.3	42.1	41.2	40.2	41.9	44.5	45.3	45.7	46.8	-0.931895
138	846	D	15	5	1	3	140.82	158.82	137.383	47.7	49.3	48.9	47.1	45	45.5	47.7	48.2	48.1	48.7	-0.190791
138	846	D	15	5	7	9	140.88	158.88	137.431	40.5	41	40.4	39.1	37.8	39.2	41.7	42.5	42.7	43.5	-1.01565
138	846	D	15	5	13	15	140.94	158.94	137.479	47.1	47.9	47.4	46.2	44.8	45.7	48	48.7	48.8	49.7	-0.263113
138	846	D	15	5	19	21	141	159	137.529	51.3	52.6	52.1	50.8	49.3	50.1	52.3	52.9	52.9	53.6	0.215093
138	846	D	15	5	25	27	141.06	159.06	137.58	50.3	51.3	51	49.9	48.6	49.6	51.8	52.5	52.4	53.1	0.0989196
138	846	D	15	5	31	33	141.12	159.12	137.632	49.1	50.4	49.9	48.5	47	47.9	50.1	50.7	50.8	51.3	-0.0401146
138	846	D	15	5	37	39	141.18	159.18	137.684	46.5	47.1	46.7	45.6	44.5	45.8	48.2	48.8	49.1	50	-0.339174
138	846	D	15	5	43	45	141.24	159.24	137.736	49	50.3	49.9	48.5	46.8	47.7	49.9	50.5	50.4	50.9	-0.0552844
138	846	D	15	5	49	51	141.3	159.3	137.788	48.7	49.9	49.8	48.9	47.8	49	51.3	52.1	52	52.6	-0.0914453
138	846	D	15	5	55	57	141.36	159.36	137.839	54.9	56.1	56	55	53.7	54.5	56.6	57.3	57.2	57.9	0.615368
138	846	D	15	5	61	63	141.42	159.42	137.891	54.8	55.5	55.2	54.4	53.5	54.6	56.8	57.6	57.9	58.8	0.602068
138	846	D	15	5	67	69	141.48	159.48	137.943	60.1	61.6	61.3	60	58.4	58.9	60.7	61.1	60.9	61.4	1.20601
138	846	D	15	5	73	75	141.54	159.54	137.995	51	51.5	51.2	50.3	49.3	50.6	52.8	53.5	53.9	54.8	0.163974
138	846	D	15	5	79	81	141.6	159.6	138.048	53.5	54.3	53.8	52.5	51	51.8	53.8	54.5	54.5	55.3	0.447864
138	846	D	15	5	85	87	141.66	159.66	138.1	51.7	52.1	51.5	50.1	48.5	49.2	51.3	51.9	52	52.3	0.240247
138	846	D	15	5	91	93	141.72	159.72	138.152	55.1	55.9	55.5	54.1	52.4	53.1	55.1	55.6	55.5	56.1	0.62701
138	846	D	15	5	97	99	141.78	159.78	138.208	52.1	52.7	52.3	51.1	49.8	50.8	52.9	53.5	53.6	54.2	0.282229
138	846	D	15	5	103	105	141.84	159.84	138.265	48.8	49.1	48.6	47.8	46.8	48.2	50.5	51.2	51.7	52.6	-0.0968426
138	846	D	15	5	109	111	141.9	159.9	138.321	44.2	45	44.9	44.4	44.1	46.1	48.7	49.7	50.2	51.3	-0.624509
138	846	D	15	5	115	117	141.96	159.96	138.377	54.3	56	56	55.3	54.6	56.1	58.4	59.2	59.3	59.9	0.528088
138	846	D	15	5	121	123	142.02	160.02	138.434	59.4	60.8	60.4	58.9	57.1	57.5	59.4	59.9	59.7	60.1	1.10917
138	846	D	15	5	127	129	142.08	160.08	138.49	61.5	63.5	63.1	61.5	59.6	59.9	61.6	62	61.9	62.1	1.34734
138	846	D	15	5	133	135	142.14	160.14	138.546	58.9	60.4	59.9	58.1	56	56	57.7	58.1	57.9	58.4	1.04828
138	846	D	15	5	139	141	142.2	160.2	138.602	53	53.6	53.1	52	50.7	51.5	53.7	54.3	54.4	54.9	0.372014
138	846	D	15	5	145	147	142.26	160.26	138.659	46.8	47.7	47.2	46.1	45	46.2	48.6	49.4	49.7	50.5	-0.338538
138	846	D	15	6	1	3	142.32	160.32	138.715	58.9	60.6	59.9	58	55.9	56.2	58	58.5	58.3	58.8	1.04267
138	846	D	15	6	7	9	142.38	160.38	138.771	53.9	54.9	54.5	53.3	52.1	53	55.1	55.8	55.8	56.7	0.469278
138	846	D	15	6	13	15	142.44	160.44	138.827	54.5	55.7	55.2	53.7	52	52.5	54.4	55	55	55.2	0.535991
138	846	D	15	6	19	21	142.5	160.5	138.884	55.3	55.8	55.4	54.2	52.7	53.3	55.2	55.9	55.7	56.4	0.625564
138	846	D	15	6	25	27	142.56	160.56	138.94	57.3	57.2	56.3	55.2	53.9	54.7	56.5	57.2	57.3	58.2	0.852302
138	846	D	15	6	31	33	142.62	160.62	138.996	64.8	66.4	65.7	63.8	61.4	61.2	62.6	62.9	62.6	62.7	1.70771
138	846	D	15	6	37	39	142.68	160.68	139.052	59.1	60.3	60.1	59.1	57.7	58.3	60.2	60.7	60.5	61.2	1.05431
138	846	D	15	6	43	45	142.74	160.74	139.108	49	49.6	49.1	48.2	47.4	48.9	51.2	51.9	52.1	53	-0.102028
138	846	D	15	6	49	51	142.8	160.8	139.165	47.8	49.2	49.2	48.2	47.2	48.5	50.8	51.5	51.7	52.5	-0.241062
138	846	D	15	6	55	57	142.86	160.86	139.221	49.9	51.8	51.4	49.8	47.9	48.8	51	51.4	51.2	51.9	-0.00289411
138	846	D	15	6	61	63	142.92	160.92	139.278	46.7	47.4	46.8	45.5	44.1	45.2	47.5	48.1	48.2	48.9	-0.370536
138	846	D	15	6	67	69	142.98	160.98	139.334	44.8	45.8	45.5	44.5	43.4	44.9	47.5	48.2	48.4	49.4	-0.589582
138	846	D	15	6	73	75	143.04	161.04	139.39	43.3	43.9	43.4	42.4	41.3	42.6	45	45.7	45.9	46.6	-0.762908
138	846	D	15	6	79	81	143.1	161.1	139.446	54.3	55.9	55.5	53.9	52	52.4	54.3	54.8	54.7	55	0.492563
138	846	D	15	6	85	87	143.16	161.16	139.498	54.9	55.3	54.4	52.8	50.9	51.3	53	53.6	53.7	53.9	0.559276
138	846	D	15	6	91	93	143.22	161.22	139.546	60.1	61	60.5	59.1	57.3	57.5	59.2	59.8	59.7	60.1	1.15178
138	846	D	15	6	97	99	143.28	161.28	139.594	59.4	60.4	59.7	58.2	56.3	56.6	58.3	58.8	58.7	59	1.0699
138	846	D	15	6	103	105	143.34	161.34	139.642	57.6	58.7	58.3	56.9	55.4	56	57.8	58.5	58.3	58.9	0.862286
138	846	D	15	6	109	111	143.4	161.4	139.69	58.2	59.4	58.6	56.6	54.3	54.4	56.2	56.6	56.4	56.8	0.928999
138	846	D	15	6	115	117	143.46	161.46	139.738	56.3	57.1	56.1	54.1	51.8	51.9	53.6	54.1	53.9	54.1	0.709952
138	846	D	15	6	121	123	143.52	161.52	139.786	55.6	57.1	56.7	55	53.1	53.6	55.5	55.9	55.7	56.2	0.62807
138	846	D	15	6	127	129	143.58	161.58	139.834	61.3	63	62.9	61.6	60.1	60.7	62.5	63.1	63	63.4	1.27773
138	846	D	15	6	133	135	143.64	161.64	139.882	62.1	64.1	63.7	62	60.1	60.3	62	62.5	62.2	62.5	1.3673
138	846	D	15	6	139	141	143.7	161.7	139.93	62.1	63.9	63.8	62.7	61.4	62.3	64.1	64.6	64.7	65.3	1.36543
138	846	D	15	6	145	147	143.76	161.76	139.978	56.8	58.3	57.9	56.7	55.3	56.1	58.1	58.7	58.7	59.4	0.757755
138	846	D	15	7	1	3	143.82	161.82	140.025	47.8	47.9	47.5	46.7	45.9	48.4	52	53	53.1	54	-0.272848
138	846	D	15	7	7	9	143.88	161.88	140.073	64.9	66.7	66.3	64.7	62.8	62.9	64.5	64.8	64.8	65.1	1.67988
138	846	D	15	7	13	15	143.94	161.94	140.121	64.5	66.8	66.5	64.7	62.5	62.4	63.9	64.3	63.8	64.1	1.63228
138	846	D	15	7	19	21	144	162	140.17	59.3	60.4	60.4	59.8	59.2	60.6	62.7	63.4	63.8	64.6	1.03604
138	846	D	15	7	25	27	144.06	162.06	140.218	54.3	55.7	55.5	54.6	53.5	54.8	56.9	57.6	57.7	58.3	0.462647
138	846	D	15	7	31	33	144.12	162.12	140.266	54.2	56.1	55.9	54.5	53	53.8	55.8	56.3	56.3	56.9	0.449347
138	846	D	15	7	37	39	144.18	162.18	140.314	51	53.2	53.1	52.1	50.7	51.9	54.1	54.6	54.5	55.2	0.0817056
138	846	D	15	7	43	45	144.24	162.24	140.362	52.3	54.5	54.6	53.5	52.2	53.3	55.5	56.1	56	56.6	0.228431
138	846	D	15	7	49	51	144.3	162.3	140.41	53.3	55.6	55.8	55	54	55.5	57.7	58.4	58.5	59.3	0.340865
138	846	D	15	7	55	57	144.36	162.36	140.458	58.3	60.2	60.3	59.6	58.7	59.9	61.9	62.6	62.7	63.5	0.910513
138	846	D	15	7	61	63	144.42	162.42	140.506	63.5	64.6	64.4	63.7	62.8	63.7	65.6	66.4	66.6	67.3	1.50302
138	846	D	15	7	67	69	144.48	162.48	140.554	62.1	64.2	64.4	63.8	63	64	65.9	66.5	66.5	67.1	1.34113
138	846	D	15	7	73	75	144.54	162.54	140.602	62.7	64.3	64	62.5	60.7	61	62.7	63.2	63	63.5	1.40784
138	846	B	16	2	121	123	142.72	162.92	140.647	74.1	73.9	72.5	70.8	68.9	69.2	70.5	71.1	71.8	72	2.21969
138	846	D	15	7	79	81	144.6	162.6	140.65	65.2	66.7	66	64	61.4	60.9	62.1	62.5	62	62.2	1.69173
138	846	B	16	2	125	127	142.76	162.96	140.68	69.3	69.1	67.9	66.3	64.6	65.1	66.6	67.3	67.7	68.7	1.71958
138	846	D	15	7	85	87	144.66	162.66	140.7	61.9	63.8	63.4	61.9	59.9	60	61.5	62	61.7	61.9	1.31266
138	846	B	16	2	129	131	142.8	163	140.714	68.7	68.6	67.3	65.2	62.9	62.9	64.2	64.7	64.9	65.7	1.65653
138	846	B	16	2	133	135	142.84	163.04	140.749	66.6	66.3	64.8	62.6	60.3	60.3	61.9	62.4	62.3	63.2	1.43738
138	846	B	16	2	137	139	142.88	163.08	140.784	67.9	67.7	65.9	63.3	60.7	60.6	62	62.3	62.2	62.7	1.57204
138	846	B	16	2	141	143	142.92	163.12	140.819	65.8	66	64.8	63	61.1	61.7	63.3	63.6	63.7	64.5	1.35289
138	846	B	16	2	145	147	142.96	163.16	140.854	59.4	59.5	58.8	57.6	56.5	58	60	60.6	61	62.5	0.686296
138	846	B	16	3	2	4	143.03	163.23	140.915	57.7	58.2	57.6	56.4	55.3	56.8	59	59.6	59.7	61	0.508309
138	846	B	16	3	6	8	143.07	163.27	140.95	58	59	58.5	57.2	56	57.3	59.4	59.8	60	61.1	0.538903
138	846	B	16	3	10	12	143.11	163.31	140.984	49.8	51.1	50.9	50	49.3	51.4	54	54.7	55	56	-0.314996
138	846	B	16	3	14	16	143.15	163.35	141.02	47.7	48.3	47.8	46.6	45.4	47.1	49.6	50.3	50.6	51.9	-0.534141
138	846	B	16	3	18	20	143.19	163.39	141.054	50.7	52	51.5	50.2	48.9	50.5	52.8	53.2	53.3	54.3	-0.222589
138	846	B	16	3	22	24	143.23	163.43	141.089	49.3	50.1	50	49.1	48.4	50.5	53	53.7	54.2	55.5	-0.368892
138	846	B	16	3	26	28	143.27	163.47	141.124	54.6	55.4	54.9	53.6	52.3	53.8	55.9	56.4	56.7	57.8	0.181995
138	846	B	16	3	30	32	143.31	163.51	141.159	52.9	53.7	53.4	52.5	51.6	53.4	55.9	56.5	57	58.5	0.00447322
138	846	B	16	3	34	36	143.35	163.55	141.194	57.1	58.4	58	56.9	55.9	57.3	59.4	60	60.5	61.4	0.440896
138	846	B	16	3	38	40	143.39	163.59	141.229	56.8	58	57.5	56.4	55.3	56.7	59	59.4	59.5	60.9	0.409056
138	846	B	16	3	42	44	143.43	163.63	141.264	57.4	58.1	57.7	56.3	55	56.2	58.3	58.8	59.2	59.8	0.470869
138	846	B	16	3	46	48	143.47	163.67	141.298	56.2	56.7	56.5	56	55.5	57.6	59.9	61	61.5	62.2	0.345377
138	846	B	16	3	50	52	143.51	163.71	141.334	57.7	58.3	57.8	56.8	55.8	57.3	59.4	59.9	60.2	61.8	0.500843
138	846	B	16	3	54	56	143.55	163.75	141.368	56.4	57.1	56.2	54.6	53.2	54.4	56.5	57	56.8	57.6	0.364945
138	846	B	16	3	58	60	143.59	163.79	141.403	55.5	56.4	56	54.7	53.5	55	57.3	57.8	57.9	58.7	0.270671
138	846	B	16	3	62	64	143.63	163.83	141.438	55.7	56.8	56.4	55.3	54.5	56.1	58.4	59.1	59.4	60.5	0.290859
138	846	B	16	3	66	68	143.67	163.87	141.473	52.9	53.9	53.9	53.3	52.9	55.3	57.9	58.5	59	60.5	-0.00112485
138	846	D	16	1	1	3	144.32	164.32	141.493	68.2	70.7	70.5	68.9	67.1	67.2	68.6	68.9	68.4	68.7	1.98104
138	846	B	16	3	70	72	143.71	163.91	141.505	60.2	61.6	61.2	59.9	58.8	60.2	62.2	62.4	62.1	63.2	0.757878
138	846	B	16	3	74	76	143.75	163.95	141.545	60	61	60.3	58.7	57.3	58.2	60.2	60.4	60.2	61.3	0.736445
138	846	D	16	1	7	9	144.38	164.38	141.564	65.3	67.6	67.8	66.9	65.9	66.7	68.4	68.7	68.6	68.9	1.64769
138	846	D	16	1	13	15	144.44	164.44	141.638	47.8	48.6	47.9	46.6	45.2	46.4	48.7	49.4	49.5	50.5	-0.354493
138	846	D	16	1	19	21	144.5	164.5	141.713	56	58.4	58.7	58	57.1	58.3	60.4	60.8	60.4	60.8	0.580927
138	846	D	16	1	25	27	144.56	164.56	141.784	56.4	59	59.5	59.1	58.6	60.3	62.4	62.9	62.8	63.4	0.624779
138	846	D	16	1	31	33	144.62	164.62	141.852	59.4	62.4	63.1	62.7	62.2	63.7	65.6	66.1	66	66.5	0.96582
138	846	D	16	1	37	39	144.68	164.68	141.918	63	64.2	64	63.3	62.6	63.6	65.4	66	66.1	66.7	1.37544
138	846	D	16	1	43	45	144.74	164.74	141.983	68.6	70.3	70.2	69.2	68.1	68.5	70.1	70.5	70.3	70.9	2.01367
138	846	D	16	1	49	51	144.8	164.8	142.045	67.7	69.6	69.3	68	66.6	67	68.4	68.8	68.6	69	1.90893
138	846	D	16	1	55	57	144.86	164.86	142.107	62.6	63.6	63.2	62.1	60.9	61.6	63.3	63.8	63.6	64	1.32411
138		D	16	1	61	63	144.92	164.92	142.169	66.3	67.5	67.2	66.1	64.8	65.3	67	67.5	67.3	67.9	1.74517
138	846	D	16	1	67	69	144.98	164.98	142.23	63.4	64.3	63.9	62.7	61.3	62	63.7	64.2	64.2	65	1.41182
138	846	D	16	1	73	75	145.04	165.04	142.29	56	56.5	56.1	55.2	54.4	55.7	57.8	58.5	59	59.8	0.5641
138	846	D	16	1	79	81	145.1	165.1	142.35	57.1	59	59.2	58.7	58.3	59.9	62.1	62.8	63.1	63.8	0.687964
138	846	D	16	1	85	87	145.16	165.16	142.41	56.9	57.9	57.8	57.5	57.1	58.7	60.9	61.8	62.2	63.2	0.663233
138	846	D	16	1	91	93	145.22	165.22	142.469	66.1	67.5	67.3	66.4	65.2	65.9	67.6	68.2	68	68.6	1.71296
138	846	D	16	1	97	99	145.28	165.28	142.528	64.3	65.7	65.7	64.9	64	65.1	67	67.6	67.7	68.2	1.50534
138	846	D	16	1	103	105	145.34	165.34	142.586	70.1	71.5	71.1	69.9	68.3	68.4	69.9	70.4	70.3	70.6	2.16643
138	846	D	16	1	109	111	145.4	165.4	142.645	71.1	72.6	72.1	70.6	68.7	68.6	69.9	70.4	70.1	70.6	2.27887
138	846	D	16	1	115	117	145.46	165.46	142.703	71.1	72.2	71.7	70.3	68.5	68.5	69.8	70.2	70.1	71	2.277
138	846	D	16	1	121	123	145.52	165.52	142.761	72.6	73.9	73.5	72.2	70.7	70.7	72.1	72.7	72.6	73.1	2.44658
138	846	D	16	1	127	129	145.58	165.58	142.817	69.4	69.9	69.3	68.6	67.7	68.4	70.1	70.8	71	71.6	2.07894
138	846	D	16	1	133	135	145.64	165.64	142.873	65.8	67.5	67.7	67.2	66.7	68.4	70.4	71.2	71.5	72.4	1.66558
138	846	D	16	1	139	141	145.7	165.7	142.929	69.4	70.8	70.5	69.5	68.3	68.9	70.4	71	71	71.9	2.0752
138	846	D	16	1	145	147	145.76	165.76	142.986	63.1	63.8	63.5	62.7	61.8	62.8	64.6	65.3	65.6	66.3	1.35322
138	846	D	16	2	1	3	145.82	165.82	143.042	74.4	76.1	76.1	75.2	74.2	74.9	76.4	77	76.7	77.2	2.64298
138	846	D	16	2	7	9	145.88	165.88	143.095	78.5	80.1	80	78.9	77.5	77.6	78.8	79.4	79.1	79.7	3.10976
138	846	D	16	2	13	15	145.94	165.94	143.148	76.3	78	77.7	76.4	74.7	74.7	76	76.4	76.2	76.2	2.85642
138	846	D	16	2	19	21	146	166	143.199	64.6	65.3	64.9	64.1	63.2	64.1	65.8	66.4	66.5	67.5	1.5172
138	846	D	16	2	25	27	146.06	166.06	143.251	78.8	79.8	79.6	78.7	77.3	77.3	78.4	78.8	78.3	78.7	3.13844
138	846	D	16	2	31	33	146.12	166.12	143.304	74.6	75.7	75.4	74.6	73.6	73.9	75.3	75.9	75.8	76.5	2.65649
138	846	D	16	2	37	39	146.18	166.18	143.355	69.3	69.6	68.9	67.9	66.9	67.5	69	69.6	69.7	70.3	2.04881
138	846	D	16	2	43	45	146.24	166.24	143.407	67.2	67.6	66.7	65.2	63.5	63.7	65.2	65.7	65.7	66.3	1.80691
138	846	D	16	2	49	51	146.3	166.3	143.459	59	59.8	59.5	58.7	57.8	59.1	61.2	61.8	62.1	62.6	0.867746
138	846	D	16	2	55	57	146.36	166.36	143.511	52.8	54.1	53.7	52.4	50.9	51.9	54	54.6	54.5	55	0.157194
138	846	D	16	2	61	63	146.42	166.42	143.563	49.7	50.1	49.5	48.2	46.9	48.1	50.1	50.9	51.1	51.5	-0.199017
138	846	D	16	2	67	69	146.48	166.48	143.615	56.1	57.1	56.4	55	53.5	54.3	56.2	56.7	56.6	57.1	0.530656
138	846	D	16	2	73	75	146.54	166.54	143.667	55.1	56.4	56	54.7	53.5	54.5	56.5	57.1	57	57.6	0.414483
138	846	D	16	2	79	81	146.6	166.6	143.719	59.6	61.1	60.6	59.1	57.4	57.9	59.8	60.2	60	60.5	0.92698
138	846	D	16	2	85	87	146.66	166.66	143.77	63.7	65.2	64.7	63.4	61.9	62.4	64.2	64.7	64.5	64.8	1.39375
138	846	D	16	2	91	93	146.72	166.72	143.82	64.2	66	65.7	64.4	62.9	63.5	65.3	65.9	65.7	66	1.44904
138	846	D	16	2	97	99	146.78	166.78	143.868	47	48.8	49.3	48.9	48.8	51.3	54	54.9	55.2	55.8	-0.518856
138	846	D	16	2	103	105	146.84	166.84	143.916	61	62.5	62.3	61.1	59.9	60.6	62.5	63.1	63	63.5	1.07953
138	846	D	16	2	109	111	146.9	166.9	143.964	70.3	71.9	71.2	69.3	67	66.7	67.9	68.3	68	68.3	2.14068
138	846	D	16	2	115	117	146.96	166.96	144.012	67.3	69	68.4	66.8	65	65	66.5	67.1	66.8	67.1	1.7959
138	846	D	16	2	121	123	147.02	167.02	144.06	68.1	70.1	70	69	68	68.6	70.2	70.7	70.7	70.9	1.88547
138	846	D	16	2	127	129	147.08	167.08	144.108	71.9	73.3	73.3	72.4	71.5	71.9	73.5	74.2	74	74.4	2.31796
138	846	D	16	2	133	135	147.14	167.14	144.157	76.4	77.1	76.5	75.3	73.8	73.8	75.1	75.7	75.5	75.9	2.83045
138	846	D	16	2	139	141	147.2	167.2	144.205	77.3	78.3	77.8	76.5	75	74.9	76.1	76.6	76.5	76.9	2.93146
138	846	D	16	2	145	147	147.26	167.26	144.253	65	66.5	66.2	65	63.6	64.2	65.9	66.4	66.1	66.5	1.52365
138	846	D	16	3	1	3	147.32	167.32	144.301	46.6	47.8	47.6	46.6	45.6	47	49.4	50.2	50.4	51	-0.581405
138	846	D	16	3	7	9	147.38	167.38	144.349	41.4	42.9	42.6	41.3	40	41.4	43.9	44.5	44.5	45.2	-1.17765
138	846	D	16	3	13	15	147.44	167.44	144.397	41	42.3	41.6	39.6	37.6	38.5	40.9	41.3	41	41.5	-1.22524
138	846	D	16	3	19	21	147.5	167.5	144.445	36.9	38.6	38.6	37.6	36.6	38.5	41.2	41.9	41.8	42.5	-1.69576
138	846	D	16	3	25	27	147.56	167.56	144.493	42.3	44.7	44.8	43.8	42.7	44.3	46.8	47.3	47	47.5	-1.08039
138	846	D	16	3	31	33	147.62	167.62	144.541	44.5	47.2	47.4	46.5	45.5	47.2	49.7	50.2	50.1	50.7	-0.830791
138	846	D	16	3	37	39	147.68	167.68	144.589	46.3	48.6	49	48.2	47.4	49.1	51.5	52.2	52.2	52.4	-0.626914
138	846	D	16	3	43	45	147.74	167.74	144.637	46.6	47.8	47.8	47.1	46.2	47.8	50.3	50.8	51	51.5	-0.594493
138	846	D	16	3	49	51	147.8	167.8	144.684	44.9	46.9	47	46.3	45.5	47.2	49.8	50.4	50.6	51.2	-0.790679
138	846	D	16	3	55	57	147.86	167.86	144.732	45.9	47.8	47.5	46.3	44.7	45.8	48.2	48.6	48.7	49.1	-0.678245
138	846	D	16	3	61	63	147.92	167.92	144.78	45.5	47.1	47.3	46.8	46.4	48.4	51	51.9	52	52.7	-0.725836
138	846	D	16	3	67	69	147.98	167.98	144.828	46.1	47.9	47.7	46.3	44.8	45.8	48.1	48.8	48.7	49.3	-0.659124
138	846	D	16	3	73	75	148.04	168.04	144.876	45.6	46.9	46.6	45.5	44.2	45.4	47.7	48.3	48.3	48.8	-0.718145
138	846	D	16	3	79	81	148.1	168.1	144.924	43.6	44.7	44.3	43	41.6	42.9	45.3	45.9	46	46.8	-0.948623
138	846	D	16	3	85	87	148.16	168.16	144.972	48.4	50.7	50	47.9	45.5	45.9	48	48.4	48.1	48.3	-0.401835
138	846	D	16	3	91	93	148.22	168.22	145.02	40.4	41.7	41.6	40.8	40.1	41.9	44.6	45.5	45.8	46.5	-1.31813
138	846	D	16	3	97	99	148.28	168.28	145.068	43.2	44.9	45.1	44.6	43.9	45.8	48.3	49.2	49.4	50.3	-0.999953
138	846	D	16	3	103	105	148.34	168.34	145.116	51.1	53.6	53.6	52.3	50.8	51.7	53.8	54.3	54.1	54.5	-0.098824
138	846	D	16	3	109	111	148.4	168.4	145.164	52.6	54.9	55	53.9	52.7	53.8	55.9	56.5	56.2	56.6	0.0707617
138	846	D	16	3	115	117	148.46	168.46	145.212	49.3	51.6	51.8	51.3	50.8	52.7	55.2	56	56.1	56.9	-0.30831
138	846	D	16	3	121	123	148.52	168.52	145.26	52.2	53.8	54	53.2	52.4	53.8	56.1	56.8	57	57.3	0.0213008
138	846	D	16	3	127	129	148.58	168.58	145.311	59.1	61.1	61	59.8	58.4	59.1	60.9	61.3	61.1	61.3	0.808126
138	846	D	16	3	133	135	148.64	168.64	145.364	47.6	49.9	50.2	49.7	49.2	51.2	53.8	54.6	54.7	55.1	-0.508236
138	846	D	16	3	139	141	148.7	168.7	145.42	49.7	52	52.3	51.6	50.7	52.2	54.5	55	54.9	55.4	-0.270068
138	846	D	16	3	145	147	148.76	168.76	145.476	45.4	47.6	47.8	47.2	46.5	48.3	50.8	51.4	51.5	52.2	-0.763443
138	846	D	16	4	1	3	148.82	168.82	145.533	45.2	46.9	47.2	46.8	46.5	49	52.1	53	53.4	54.2	-0.788174
138	846	D	16	4	7	9	148.88	168.88	145.589	45.9	47.9	47.8	46.7	45.3	46.5	48.8	49.4	49.2	49.7	-0.710031
138	846	D	16	4	13	15	148.94	168.94	145.645	40	41.8	42	41.2	40.3	42.1	44.7	45.3	45.5	46.1	-1.38629
138	846	D	16	4	19	21	149	169	145.703	44.4	46.3	46.4	45.4	44.1	45.6	48	48.6	48.6	49.1	-0.885226
138	846	D	16	4	25	27	149.06	169.06	145.76	44.7	46.7	46.8	46	44.9	46.5	48.9	49.6	49.7	50.5	-0.852804
138	846	D	16	4	31	33	149.12	169.12	145.818	47.4	49	48.9	47.8	46.6	47.8	50.2	50.8	50.9	51.7	-0.546054
138	846	D	16	4	37	39	149.18	169.18	145.876	45.2	47.3	47.7	46.9	46.1	47.8	50.3	51.1	51.1	51.8	-0.799392
138	846	D	16	4	43	45	149.24	169.24	145.934	47	48.6	48.5	47.5	46.2	47.5	49.9	50.6	50.7	51.2	-0.595515
138	846	D	16	4	49	51	149.3	169.3	145.992	47.6	48.8	48.5	47.3	45.8	46.9	49.1	49.8	49.7	50.3	-0.528803
138	846	D	16	4	55	57	149.36	169.36	146.049	51.5	54.1	54.2	52.8	51.3	52.2	54.2	54.8	54.4	54.9	-0.0848881
138	846	D	16	4	61	63	149.42	169.42	146.107	57.8	59.6	59.5	58.1	56.6	57.3	59.1	59.8	59.8	60	0.633355
138	846	D	16	4	67	69	149.48	169.48	146.164	53.6	55.7	55.8	54.6	53.1	54	56	56.6	56.5	57	0.15141
138	846	D	16	4	73	75	149.54	169.54	146.221	50	52.6	53.1	52.4	51.7	53.5	56	56.9	57	57.6	-0.261953
138	846	D	16	4	79	81	149.6	169.6	146.277	52.8	54.6	54.3	53	51.5	52.4	54.5	54.9	54.8	55.4	0.0562277
138	846	D	16	4	85	87	149.66	169.66	146.334	50.6	51.7	51.3	50.2	48.9	49.9	52	52.6	52.6	53	-0.19711
138	846	D	16	4	91	93	149.72	169.72	146.39	53.9	56.1	56.2	55	53.5	54.3	56.3	56.7	56.5	56.7	0.178222
138	846	D	16	4	97	99	149.78	169.78	146.446	53	55	54.9	53.6	52.2	53.1	55.1	55.6	55.4	55.9	0.0734792
138	846	D	16	4	103	105	149.84	169.84	146.502	49.6	51.7	51.8	50.9	49.9	51.3	53.6	54.1	54	54.6	-0.317023
138	846	D	16	4	109	111	149.9	169.9	146.559	47.5	49.7	49.8	48.9	47.9	49.4	51.8	52.4	52.3	52.9	-0.55893
138	846	D	16	4	115	117	149.96	169.96	146.615	45	47.3	47.7	47.4	47	49.3	51.9	52.7	52.8	53.4	-0.846559
138	846	D	16	4	121	123	150.02	170.02	146.671	48.3	51.4	51.6	50.4	49.1	50.5	52.7	53.1	52.7	53.2	-0.471227
138	846	D	16	4	127	129	150.08	170.08	146.727	45.8	48.3	48.7	47.8	46.7	48.4	50.9	51.4	51.2	51.8	-0.758856
138	846	D	16	4	133	135	150.14	170.14	146.783	46.1	48.2	48.4	47.7	46.9	48.6	51.1	51.7	51.8	52.3	-0.726435
138	846	D	16	4	139	141	150.2	170.2	146.837	43.7	46.3	46.9	46.4	46	48.3	51.1	51.8	51.8	52.4	-1.00263
138	846	D	16	4	145	147	150.26	170.26	146.89	54.6	56.3	56.5	55.9	55.2	56.7	58.9	59.6	59.8	60.5	0.241407
138	846	D	16	5	1	3	150.32	170.32	146.942	57.2	58.8	58.6	57.5	56.3	57.2	59.1	59.6	59.5	60.1	0.536727
138	846	D	16	5	7	9	150.38	170.38	146.994	59.7	61.2	61	60.1	58.9	60	61.9	62.4	62.3	62.8	0.820616
138	846	D	16	5	13	15	150.44	170.44	147.046	54.1	56.1	56.1	55.1	54	55	57.1	57.6	57.4	57.7	0.178646
138	846	D	16	5	19	21	150.5	170.5	147.098	58.8	61	61.1	60.2	59.1	60.3	62.3	62.8	62.5	63	0.714004
138	846	D	16	5	25	27	150.56	170.56	147.15	57	59.2	59.4	58.4	57.1	58.2	60.2	60.5	60.3	60.8	0.506387
138	846	D	16	5	31	33	150.62	170.62	147.202	49.7	51.9	52	51.1	50.2	51.8	54.1	54.6	54.5	55	-0.329899
138	846	D	16	5	37	39	150.68	170.68	147.254	48.4	50.5	50.7	50	49.2	50.8	53.1	53.7	53.5	54.1	-0.480364
138	846	D	16	5	43	45	150.74	170.74	147.306	55.1	58.2	58.8	58.2	57.7	59.4	61.7	62.3	62.1	62.5	0.283601
138	846	D	16	5	49	51	150.8	170.8	147.358	58.7	60.8	61.1	60.6	60	61.5	63.6	64.2	64.1	64.6	0.693224
138	846	D	16	5	55	57	150.86	170.86	147.41	60.1	61.9	62.1	61.3	60.4	61.7	63.7	64.2	64.1	64.6	0.85138
138	846	D	16	5	61	63	150.92	170.92	147.461	66.7	68.2	68.1	67.3	66.4	67.5	69.3	69.7	69.6	69.8	1.60391
138	846	D	16	5	67	69	150.98	170.98	147.511	62.4	64.1	64.1	63.3	62.4	63.5	65.4	65.9	65.7	66.2	1.11054
138	846	D	16	5	73	75	151.04	171.04	147.56	56.1	57.1	56.9	56.1	55.3	56.7	58.8	59.5	59.7	60.6	0.388556
138	846	D	16	5	79	81	151.1	171.1	147.608	55.1	56.6	56.7	56.1	55.4	56.9	59.1	59.8	60	60.6	0.272383
138	846	D	16	5	85	87	151.16	171.16	147.656	60.5	61.7	61.5	60.5	59.3	60.2	62.2	62.8	62.8	63.3	0.887753
138	846	D	16	5	91	93	151.22	171.22	147.704	56.1	58.2	58.4	57.5	56.5	57.9	60.1	60.6	60.4	60.7	0.382947
138	846	D	16	5	97	99	151.28	171.28	147.752	59	61.1	61	59.8	58.4	59.3	61.2	61.5	61.2	61.6	0.712558
138	846	D	16	5	103	105	151.34	171.34	147.8	53.7	55.8	55.9	54.9	53.8	55.1	57.2	57.7	57.5	57.7	0.104878
138	846	D	16	5	109	111	151.4	171.4	147.848	49.7	51.8	51.8	50.6	49.4	50.6	52.8	53.2	52.9	53.3	-0.354206
138	846	D	16	5	115	117	151.46	171.46	147.896	48.3	50.1	50.3	49.7	48.9	50.6	53	53.5	53.6	54	-0.516101
138	846	D	16	5	121	123	151.52	171.52	147.944	49.9	51.9	52	51.3	50.5	52.1	54.4	54.9	54.7	55.5	-0.335085
138	846	D	16	5	127	129	151.58	171.58	147.992	56.3	58.4	58.6	57.7	56.6	57.8	59.9	60.3	60	60.3	0.394589
138	846	D	16	5	133	135	151.64	171.64	148.04	53.7	54.6	54.4	53.6	52.9	54.3	56.5	57.1	57.5	58.2	0.0955298
138	846	D	16	5	139	141	151.7	171.7	148.088	64.5	66.8	66.9	66	65	65.7	67.4	67.9	67.5	67.5	1.32814
138	846	D	16	5	145	147	151.76	171.76	148.136	57.7	59.8	59.9	59.1	58	59.2	61.2	61.6	61.3	61.5	0.549005
138	846	D	16	6	1	3	151.82	171.82	148.184	60.6	61.9	61.8	60.8	59.8	60.9	62.8	63.4	63.4	64	0.878616
138	846	D	16	6	7	9	151.88	171.88	148.232	64.1	66	66.1	65.3	64.4	65.4	67.3	68	68	68.3	1.27681
138	846	D	16	6	13	15	151.94	171.94	148.28	58.8	60.4	60.2	59.2	58	58.9	60.8	61.5	61.6	62.1	0.66913
138	846	D	16	6	19	21	152	172	148.328	64.1	64.9	64.5	63.6	62.5	63.2	65	65.6	65.6	66.1	1.27307
138	846	D	16	6	25	27	152.06	172.06	148.376	57.7	58.6	58.4	57.7	57	58.3	60.4	61.1	61.4	61.9	0.539656
138	846	D	16	6	31	33	152.12	172.12	148.424	64.6	66.9	66.8	65.6	64.2	64.9	66.6	66.9	66.5	66.4	1.32648
138	846	D	16	6	37	39	152.18	172.18	148.472	57.7	60.4	60.7	60	59.3	60.6	62.7	63.3	63.1	63.4	0.535917
138	846	D	16	6	43	45	152.24	172.24	148.52	54.4	57.1	57.2	56.2	55.2	56.4	58.5	58.9	58.7	58.7	0.156845
138	846	D	16	6	49	51	152.3	172.3	148.568	51.5	53.9	54.3	54	53.6	55.6	58	58.7	59	59.7	-0.176505
138	846	D	16	6	55	57	152.36	172.36	148.616	58.7	60.9	61.4	61.2	60.6	62.1	64.2	64.8	64.7	65.2	0.644611
138	846	D	16	6	61	63	152.42	172.42	148.664	58	61.3	61.9	61.4	60.7	62	64.1	64.5	64.3	64.6	0.562729
138	846	D	16	6	67	69	152.48	172.48	148.713	54.7	57.3	58	57.8	57.5	59.3	61.6	62.1	62	62.5	0.183657
138	846	D	16	6	73	75	152.54	172.54	148.764	54.2	56.9	57.6	57.1	56.5	58.2	60.4	60.9	60.9	61.3	0.124636
138	846	D	16	6	79	81	152.6	172.6	148.816	50.7	53.5	54.4	54.2	54	56.2	58.8	59.5	59.7	60.3	-0.277297
138	846	D	16	6	85	87	152.66	172.66	148.868	50.4	53.4	54.2	53.9	53.6	55.8	58.3	58.9	59.1	59.6	-0.313458
138	846	D	16	6	91	93	152.72	172.72	148.921	46.9	50.1	51.2	51	50.9	53.2	55.9	56.5	56.6	57.2	-0.71539
138	846	D	16	6	97	99	152.78	172.78	148.972	44.7	48.3	49.5	49.7	49.9	52.6	55.5	56	56	56.4	-0.968728
138	846	D	16	6	103	105	152.84	172.84	149.024	47.2	51	52.3	52.3	52.3	54.8	57.5	58	57.8	58.3	-0.684839
138	846	D	16	6	109	111	152.9	172.9	149.076	43.1	46.8	48.4	48.9	49.3	52.7	55.7	56.6	56.6	57	-1.15535
138	846	D	16	6	115	117	152.96	172.96	149.128	44.2	47.6	49	49.2	49.3	52.2	55	55.7	55.8	56.5	-1.03149
138	846	D	16	6	121	123	153.02	173.02	149.18	44.7	47.9	49.4	49.8	50.2	53.2	56.1	56.9	57.2	57.8	-0.976207
138	846	D	16	6	127	129	153.08	173.08	149.232	41.5	44.9	46.3	46.7	47.1	50.2	53.1	53.9	53.9	54.7	-1.34385
138	846	D	16	6	133	135	153.14	173.14	149.284	39.6	43.2	45	45.6	46.3	50.2	53.3	54.1	54.4	55.1	-1.5629
138	846	D	16	6	139	141	153.2	173.2	149.336	37.8	41.1	42.7	43.2	43.8	47.4	50.5	51.4	51.7	52.7	-1.77051
138	846	D	16	6	145	147	153.26	173.26	149.387	39.8	43	44.4	44.7	44.9	47.8	50.8	51.5	51.5	52.1	-1.54377
138	846	D	16	7	1	3	153.32	173.32	149.436	41	44.6	46.3	46.7	47.2	50.5	53.6	54.4	54.6	55.1	-1.40848
138	846	D	16	7	7	9	153.38	173.38	149.484	42.4	45.9	47.1	47.2	47.2	49.7	52.5	53.1	52.9	53.5	-1.25032
138	846	D	16	7	13	15	153.44	173.44	149.531	43.6	46.6	47.4	47.1	46.6	48.7	51.3	51.8	51.7	52.1	-1.11503
138	846	D	16	7	19	21	153.5	173.5	149.579	42.8	45.5	46.4	46.3	46.1	48.6	51.4	52.2	52.4	53.1	-1.20834
138	846	D	16	7	25	27	153.56	173.56	149.627	44.9	48.1	49.6	50	50.4	53.6	56.5	57.4	57.7	58.4	-0.970174
138	846	D	16	7	31	33	153.62	173.62	149.675	48.3	51.5	52.7	52.9	52.9	55.5	58.2	59	59.1	59.7	-0.583411
138	846	D	16	7	37	39	153.68	173.68	149.723	49.9	53.3	54.9	55.4	55.8	58.7	61.5	62.2	62.3	62.9	-0.402395
138	846	D	16	7	43	45	153.74	173.74	149.771	46.7	50.7	52.7	53.6	54.6	58.6	61.9	62.8	63.1	63.7	-0.770037
138	846	D	16	7	49	51	153.8	173.8	149.819	52.9	56.8	58.7	59.4	60.1	63.5	66.4	67.1	67.2	67.8	-0.0632238
138	846	D	16	7	55	57	153.86	173.86	149.867	55.2	58.9	60.6	61.3	62	65.1	67.8	68.6	68.5	69.2	0.197805
138	846	B	17	3	25	27	152.76	174.01	149.905	54.6	56.6	57.2	57.1	57.1	59.8	62.5	63.4	63.4	64.5	-0.547707
138	846	D	16	7	61	63	153.92	173.92	149.915	49.9	53.7	55.8	56.7	57.8	61.6	64.7	65.7	65.9	66.6	-0.409874
138	846	B	17	3	29	31	152.8	174.05	149.936	58.6	61	61.5	61.5	61.3	63.8	66.1	66.8	66.9	68.1	0.0343966
138	846	D	16	7	67	69	153.98	173.98	149.964	48.7	52.6	54.4	55.1	56	59.4	62.4	63.4	63.6	64.3	-0.548908
138	846	B	17	3	33	35	152.84	174.09	149.968	61.4	62.7	62.9	62.5	62	64	66.2	66.9	66.9	67.3	0.450009
138	846	B	17	3	37	39	152.88	174.13	150.001	64.5	65.7	65.6	64.7	63.9	65.6	67.5	68.1	68.7	69.3	0.740749
138	846	B	17	3	41	43	152.92	174.17	150.15	62.9	64.6	64.9	64.3	63.7	65.8	67.9	68.6	69	70.3	1.06271
138	846	B	17	3	45	47	152.96	174.21	150.302	66.7	67.9	67.9	67.2	66.5	68.3	70.1	70.5	70.8	71.7	0.895593
138	846	B	17	3	49	51	153	174.25	150.351	70	71.5	70.9	69.5	67.8	68.5	70.1	70.2	69.9	70.5	1.29039
138	846	D	17	1	3	5	153.84	174.64	150.353	63.5	66.6	67.6	67.5	67.3	69	71	71.6	71.5	71.8	1.12222
138	846	B	17	3	53	55	153.04	174.29	150.378	69.6	70.7	70.2	69	67.8	68.7	70.2	70.6	70.7	71.5	1.63316
138	846	D	17	1	9	11	153.9	174.7	150.397	58.5	61.2	61.9	61.4	60.6	62	64	64.5	64.3	64.6	0.548831
138	846	B	17	3	57	59	153.08	174.33	150.404	67.1	68.1	67.9	66.6	65.5	66.6	68.3	68.8	68.9	69.8	1.59092
138	846	D	17	1	15	17	153.96	174.76	150.438	57.9	61.1	61.8	61.3	60.5	61.8	63.8	64.2	63.9	64.1	0.478379
138	846	D	17	1	21	23	154.02	174.82	150.479	63.8	67	67.4	66.4	65	65.8	67.4	67.6	67.2	67.4	1.1509
138	846	D	17	1	27	29	154.08	174.88	150.52	63.1	66.3	66.8	66.1	65	66	67.8	68.2	67.8	68	1.06902
138	846	D	17	1	33	35	154.14	174.94	150.564	49.3	52.5	53.4	53.1	52.7	54.8	57.2	57.7	57.7	58.3	-0.510242
138	846	D	17	1	39	41	154.2	175	150.608	43.8	47.2	48.3	48.2	48	50.6	53.2	53.8	53.8	54.4	-1.14078
138	846	D	17	1	45	47	154.26	175.06	150.653	43.5	47.1	48.4	48.5	48.4	50.8	53.4	54	53.7	53.9	-1.17694
138	846	D	17	1	51	53	154.32	175.12	150.698	35.9	39	40.2	40.4	40.5	43.6	46.6	47.3	47.4	48	-2.04752
138	846	D	17	1	57	59	154.38	175.18	150.744	38	41.4	42.6	42.6	42.3	45	47.8	48.3	48.1	48.6	-1.80935
138	846	D	17	1	63	65	154.44	175.24	150.79	31.9	34.9	35.7	35.3	34.8	37.5	40.4	40.9	40.7	41.5	-2.50847
138	846	D	17	1	69	71	154.5	175.3	150.836	32.8	36.3	37.3	37.1	36.8	39.4	42.4	42.9	42.6	43.1	-2.40747
138	846	D	17	1	75	77	154.56	175.36	150.882	35.7	38.4	39	38.4	37.7	39.9	42.7	43.2	43.1	43.7	-2.07786
138	846	D	17	1	81	83	154.62	175.42	150.929	41.7	44.7	45.4	45.1	44.7	46.7	49.2	49.7	49.7	49.9	-1.39391
138	846	D	17	1	87	89	154.68	175.48	150.976	40.3	43.6	44.4	44.1	43.7	46.1	48.8	49.3	49.2	49.5	-1.5558
138	846	D	17	1	93	95	154.74	175.54	151.023	48.4	50.7	51.3	51	50.7	52.6	55.1	55.8	56	56.5	-0.631813
138	846	D	17	1	99	101	154.8	175.6	151.071	48.5	51.2	52.1	52	51.8	54	56.5	57.1	57.1	57.9	-0.622252
138	846	D	17	1	105	107	154.86	175.66	151.118	47.5	50.1	51	50.9	50.6	52.8	55.3	56	56.1	56.8	-0.738426
138	846	D	17	1	111	113	154.92	175.72	151.165	48.4	51.8	52.8	52.5	52	54	56.4	56.9	56.7	57.1	-0.637422
138	846	D	17	1	117	119	154.98	175.78	151.213	46	49.4	50.7	50.8	50.8	53.3	56.1	56.8	56.9	57.3	-0.913621
138	846	D	17	1	123	125	155.04	175.84	151.262	44.2	47.1	48.1	48.2	48.4	50.9	53.6	54.4	54.6	55.4	-1.12124
138	846	D	17	1	129	131	155.1	175.9	151.31	46.3	49	49.8	49.9	50	52.5	55.2	56	56.3	56.9	-0.883069
138	846	D	17	1	135	137	155.16	175.96	151.358	47.1	50.7	51.9	52	52.2	54.9	57.6	58.4	58.5	58.9	-0.793496
138	846	D	17	1	141	143	155.22	176.02	151.406	44.4	47.1	47.8	47.5	47.1	49.3	52	52.8	53	53.8	-1.10399
138	846	D	17	1	147	149	155.28	176.08	151.455	42.4	44.7	45.2	45	44.7	46.8	49.4	50.2	50.6	51.4	-1.33446
138	846	D	17	2	3	5	155.34	176.14	151.508	51.9	53.9	54.4	54.1	53.7	55.4	57.7	58.5	58.9	59.1	-0.250447
138	846	D	17	2	9	11	155.4	176.2	151.563	52.3	55	55.7	55.3	54.8	56.4	58.8	59.3	59.2	59.6	-0.206596
138	846	D	17	2	15	17	155.46	176.26	151.619	55.1	57.6	58.3	58.2	57.8	59.4	61.6	62.2	62.3	62.9	0.111585
138	846	D	17	2	21	23	155.52	176.32	151.676	60.8	63.4	63.8	63.2	62.3	63.2	65.1	65.4	65.2	65.6	0.761246
138	846	D	17	2	27	29	155.58	176.38	151.733	66.4	68.9	69.4	68.8	67.8	68.6	70.2	70.6	70.3	70.6	1.39948
138	846	D	17	2	33	35	155.64	176.44	151.789	62.7	65.2	65.6	65.3	64.8	66.1	68	68.5	68.4	68.9	0.974684
138	846	D	17	2	39	41	155.7	176.5	151.846	61.9	64.2	64.6	64.3	63.9	65.2	67.1	67.7	67.7	68.1	0.881371
138	846	D	17	2	45	47	155.76	176.56	151.904	60.6	63.4	64.4	64.7	65.1	67	69.2	70.1	70.3	70.7	0.730906
138	846	D	17	2	51	53	155.82	176.62	151.962	64.5	67.4	68.4	68.5	68.6	70.3	72.2	72.9	72.9	73.2	1.17482
138	846	D	17	2	57	59	155.88	176.68	152.019	62	63.9	64.2	63.8	63.2	64.4	66.2	66.9	67	67.4	0.887192
138	846	D	17	2	63	65	155.94	176.74	152.078	55.5	58	58.3	57.6	56.6	57.6	59.6	60.2	60	60.1	0.142348
138	846	D	17	2	69	71	156	176.8	152.136	51.1	52.8	53.2	53.1	53	55	57.4	58.3	58.7	59.2	-0.362457
138	846	D	17	2	75	77	156.06	176.86	152.196	49.1	50.6	50.9	50.8	50.8	52.9	55.4	56.3	56.6	57.1	-0.592934
138	846	D	17	2	81	83	156.12	176.92	152.256	47.4	49.4	49.8	49.6	49.5	51.7	54.3	55.1	55.6	56.4	-0.78912
138	846	D	17	2	87	89	156.18	176.98	152.317	43.6	46.4	47.7	48	48.4	51.7	54.7	55.8	56.4	57.3	-1.22534
138	846	D	17	2	93	95	156.24	177.04	152.379	43.3	45.8	46.6	46.7	46.7	49.2	51.8	52.7	52.9	53.8	-1.2615
138	846	D	17	2	99	101	156.3	177.1	152.443	41.1	43.4	44.1	44.2	44.4	47	49.8	50.7	51.2	52.3	-1.51484
138	846	D	17	2	105	107	156.36	177.16	152.513	39.6	42.2	43.1	43.3	43.5	46.2	49.2	50	50.3	51.1	-1.68817
138	846	D	17	2	111	113	156.42	177.22	152.585	37.5	39.6	40.3	40.2	40.2	42.8	45.9	46.8	47.1	47.7	-1.93008
138	846	D	17	2	117	119	156.48	177.28	152.659	39.5	42.7	43.8	44	44.2	47	49.9	50.7	50.6	51.5	-1.70334
138	846	D	17	2	123	125	156.54	177.34	152.732	34.5	37	38	38.3	38.8	42	45.4	46.5	47.2	48.1	-2.27673
138	846	D	17	2	129	131	156.6	177.4	152.803	37.9	40.9	42.1	42.7	43.4	46.8	50.1	51.2	51.7	52.5	-1.88996
138	846	D	17	2	135	137	156.66	177.46	152.869	40.7	44.4	46	46.7	47.5	51.1	54.3	55.2	55.5	56.5	-1.57178
138	846	D	17	2	141	143	156.72	177.52	152.932	43.3	46.5	47.8	48.3	48.9	52	54.9	55.8	56.1	56.7	-1.27646
138	846	D	17	2	147	149	156.78	177.58	152.993	42.4	45.4	46.7	47.4	48.1	51.2	54.2	55.2	55.7	56.6	-1.38121
138	846	D	17	3	1	3	156.82	177.62	153.033	50.2	53.7	55.3	56.1	57.1	60.3	63.2	64.2	64.6	65.3	-0.490884
138	846	D	17	3	7	9	156.88	177.68	153.093	53.2	56.5	57.8	58.2	58.4	60.8	63.4	64.1	64	64.2	-0.149843
138	846	D	17	3	13	15	156.94	177.74	153.152	53.8	56.6	57.8	58.1	58.4	60.9	63.5	64.2	64.5	64.9	-0.0831301
138	846	D	17	3	19	21	157	177.8	153.211	54.4	57.5	58.8	59.1	59.3	61.9	64.4	65.1	65.3	65.8	-0.0164177
138	846	D	17	3	25	27	157.06	177.86	153.269	49.8	52.9	54.2	54.7	55.1	57.9	60.7	61.6	61.8	62.4	-0.544084
138	846	D	17	3	31	33	157.12	177.92	153.327	47.4	50.2	51.2	51.4	51.7	54.5	57.2	58.1	58.6	59.4	-0.820283
138	846	D	17	3	37	39	157.18	177.98	153.385	57.1	60.2	61	60.8	60.6	62.4	64.6	65.3	65.3	65.5	0.286593
138	846	D	17	3	43	45	157.24	178.04	153.443	51	53.5	54.2	54.3	54.4	56.9	59.5	60.5	60.8	61.4	-0.412529
138	846	D	17	3	49	51	157.3	178.1	153.501	53.2	55.5	56.2	56	55.7	57.5	59.8	60.4	60.4	60.8	-0.162931
138	846	D	17	3	55	57	157.36	178.16	153.556	52.1	54.6	55.2	55	54.9	57	59.3	60	60.1	60.3	-0.290535
138	846	D	17	3	61	63	157.42	178.22	153.609	50.7	53.3	54.4	54.6	54.9	57.9	60.6	61.5	61.7	62.5	-0.452429
138	846	D	17	3	67	69	157.48	178.28	153.657	50.7	53.5	54.6	54.9	55.2	57.9	60.5	61.4	61.7	62.3	-0.454299
138	846	D	17	3	73	75	157.54	178.34	153.705	58	60.9	61.9	62.2	62.5	64.8	67.1	67.9	68	68.5	0.378248
138	846	D	17	3	79	81	157.6	178.4	153.753	59.4	62.1	62.9	63	62.9	64.7	67	67.6	67.4	67.9	0.536403
138	846	D	17	3	85	87	157.66	178.46	153.801	51.1	53.8	54.7	54.8	54.9	57.2	59.7	60.4	60.5	61.1	-0.414187
138	846	D	17	3	91	93	157.72	178.52	153.849	53	55.3	55.8	55.4	55.1	56.9	59.3	59.9	60.1	60.7	-0.19888
138	846	D	17	3	97	99	157.78	178.58	153.896	58	60.4	60.9	60.6	60.1	61.8	64	64.6	64.4	64.7	0.370769
138	846	D	17	3	103	105	157.84	178.64	153.944	63.8	65	65	64.7	64.3	65.8	67.8	68.4	68.7	69.7	1.03186
138	846	D	17	3	109	111	157.9	178.7	153.991	66.7	68.1	68.1	67.5	66.7	67.6	69.4	69.7	69.7	70	1.36147
138	846	D	17	3	115	117	157.96	178.76	154.038	66.6	68.2	68.4	68	67.5	68.8	70.7	71.4	71.5	72.1	1.34817
138	846	D	17	3	121	123	158.02	178.82	154.086	65.6	67.6	68.1	68	67.7	69.1	71.1	71.6	71.5	71.7	1.232
138	846	D	17	3	127	129	158.08	178.88	154.133	66.4	68.9	69.2	68.6	67.8	68.6	70.3	70.7	70.4	70.6	1.32157
138	846	D	17	3	133	135	158.14	178.94	154.18	62.1	63.4	63.6	63.5	63.1	64.3	66.4	67.1	67.3	67.9	0.828195
138	846	D	17	3	139	141	158.2	179	154.226	63.9	65.5	65.6	65.2	64.7	65.7	67.7	68.2	68.3	68.5	1.03207
138	846	D	17	3	145	147	158.26	179.06	154.273	59.9	61.7	61.9	61.6	61	62.4	64.5	65.2	65.2	65.7	0.572988
138	846	D	17	4	1	3	158.32	179.12	154.319	50.6	52.8	53.2	52.6	51.9	53.4	55.7	56.4	56.5	57.1	-0.491906
138	846	D	17	4	7	9	158.38	179.18	154.366	57.3	59.5	59.6	58.5	57.3	58.2	60.3	60.6	60.4	60.4	0.272059
138	846	D	17	4	13	15	158.44	179.24	154.413	51.8	53	52.8	52.1	51.4	52.8	55	55.6	55.8	56.7	-0.358481
138	846	D	17	4	19	21	158.5	179.3	154.46	54.1	56.4	56.9	56.5	55.9	57.6	59.8	60.3	60.4	60.7	-0.0974523
138	846	D	17	4	25	27	158.56	179.36	154.506	57.1	59.5	59.8	59.1	58.1	59.3	61.3	61.7	61.6	62	0.243589
138	846	D	17	4	31	33	158.62	179.42	154.553	57.4	59.8	60.3	59.7	58.9	60.3	62.4	62.9	62.7	63.3	0.27601
138	846	D	17	4	37	39	158.68	179.48	154.6	51.8	54.6	55.2	55	54.8	56.7	59	59.6	59.8	60.1	-0.36596
138	846	D	17	4	43	45	158.74	179.54	154.647	56.5	59	60	60.3	60.3	62.1	64.3	65.2	65.4	66.3	0.169398
138	846	D	17	4	49	51	158.8	179.6	154.694	53.5	55.8	56.6	56.8	57.1	59.4	62	63.1	63.6	64.3	-0.175383
138	846	D	17	4	55	57	158.86	179.66	154.741	54.1	56.7	57.6	57.9	58.2	60.6	63.1	64.2	64.7	65.5	-0.108671
138	846	D	17	4	61	63	158.92	179.72	154.788	60	62.3	63	62.9	62.7	64.2	66.1	67.1	67.3	67.7	0.563851
138	846	D	17	4	67	69	158.98	179.78	154.835	61.9	63.7	64.1	63.9	63.5	64.8	66.6	67.4	67.7	68.3	0.779158
138	846	D	17	4	73	75	159.04	179.84	154.881	63.8	65.8	66.5	66.7	66.7	68.2	70.1	70.9	71	71.6	0.994466
138	846	D	17	4	79	81	159.1	179.9	154.928	60.8	63.3	64.1	64.3	64.3	65.7	67.8	68.5	68.7	68.9	0.649685
138	846	D	17	4	85	87	159.16	179.96	154.975	62.4	64.6	65.1	64.8	64.3	65.2	67.1	67.8	67.6	68	0.830701
138	846	D	17	4	91	93	159.22	180.02	155.021	73.3	75.3	75.3	74.2	72.6	72.4	73.7	74	73.7	73.6	2.07474
138	846	D	17	4	97	99	159.28	180.08	155.068	74.1	75.7	75.8	74.8	73.3	73.2	74.4	74.8	74.7	74.3	2.16431
138	846	D	17	4	103	105	159.34	180.14	155.115	56.2	57.4	57.8	57.8	57.7	59.4	61.8	62.6	63	63.5	0.116409
138	846	D	17	4	109	111	159.4	180.2	155.161	64	66	66.2	65.9	65.5	66.7	68.6	69.1	69.2	69.2	1.00611
138	846	D	17	4	115	117	159.46	180.26	155.208	61.9	64.4	65.1	65.2	65.3	66.9	69.1	69.8	69.5	69.9	0.7642
138	846	D	17	4	121	123	159.52	180.32	155.255	53.6	55.9	56.6	56.6	56.7	58.9	61.3	62	62.3	63.2	-0.18639
138	846	D	17	4	127	129	159.58	180.38	155.302	52.7	55.2	55.9	55.7	55.2	57.1	59.5	59.9	60.1	60.5	-0.291133
138	846	D	17	4	133	135	159.64	180.44	155.349	50.4	53.5	54.8	55.3	55.6	58.4	61.2	62.1	62.4	62.9	-0.555901
138	846	D	17	4	139	141	159.7	180.5	155.395	55.2	58.4	59.7	60.1	60.2	62.4	64.8	65.5	65.4	65.8	-0.00911304
138	846	D	17	4	145	147	159.76	180.56	155.442	47.8	50.9	52.4	53	53.6	56.4	59.2	60.1	60.3	60.9	-0.85683
138	846	D	17	5	1	3	159.82	180.62	155.489	45.7	48.9	50.6	51.4	52.1	55.2	58.2	59.1	59.3	60	-1.09874
138	846	D	17	5	7	9	159.88	180.68	155.536	52.7	55.9	57.5	58.3	59	61.7	64.4	65.3	65.3	65.7	-0.300481
138	846	D	17	5	13	15	159.94	180.74	155.583	45.7	48.4	49.9	50.7	51.5	54.7	57.7	58.8	59.4	60	-1.10248
138	846	D	17	5	19	21	160	180.8	155.629	42.3	45.6	47.5	48.6	50.1	54.1	57.5	59	59.7	60.6	-1.49298
138	846	D	17	5	25	27	160.06	180.86	155.676	47	50.2	51.9	52.8	54	57.6	60.7	61.8	62.3	63.1	-0.957622
138	846	D	17	5	31	33	160.12	180.92	155.723	43.9	47.1	48.7	49.5	50.5	54	57.1	58.4	59.1	60.2	-1.31383
138	846	D	17	5	37	39	160.18	180.98	155.77	48	51.4	53.1	54.2	55.3	58.8	61.8	63	63.3	64	-0.847057
