# Supplementary material for: A Revised Mid-Pliocene Composite Section for ODP Site 846
Source: Copernicus journal article supplement (doi:10.5194/cp-2019-133), 2020-02-21
Supplement: Supplementary file 9 [file Table S8 846 stable isotopes composite.xls]

## Sheet: 846 isotopes merged
TABLE S8: 846 STABLE ISOTOPE COMPOSITE
Lab	Hole	Core	Sec	Depth (cm)	depth mbsf	depth mcd	846 log depth	846 d18O	846 d13C	846 d18O adjusted
Shackleton	846D	9	4	95-97	83.25	93.65	79.9068	3.94	-0.65	3.94
Shackleton	846D	9	4	115-117	83.45	93.85	80.0643	3.85	-0.68	3.85
Shackleton	846D	9	4	125-127	83.55	93.95	80.143	3.85	-0.49	3.85
Shackleton	846D	9	4	135-137	83.65	94.05	80.2217	3.82	-0.44	3.82
Shackleton	846D	9	4	145-147	83.75	94.15	80.3005	3.92	-0.56	3.92
Shackleton	846D	9	5	5-7	83.85	94.25	80.3793	3.67	-0.51	3.67
Shackleton	846D	9	5	15-17	83.95	94.35	80.4581	3.55	-0.02	3.55
Shackleton	846D	9	5	25-27	84.05	94.45	80.5367	3.34	-0.04	3.34
Shackleton	846D	9	5	35-37	84.15	94.55	80.6153	3.29	-0.19	3.29
Shackleton	846D	9	5	45-47	84.25	94.65	80.6941	3.38	0.01	3.38
Shackleton	846D	9	5	55-57	84.35	94.75	80.7732	3.21	-0.21	3.21
Shackleton	846D	9	5	65-67	84.45	94.85	80.8526	3.32		3.32
Shackleton	846D	9	5	75-77	84.55	94.95	80.9315	3.67	-0.15	3.67
Shackleton	846D	9	5	85-87	84.65	95.05	81.0091	3.67	-0.35	3.67
Shackleton	846D	9	5	95-97	84.75	95.15	81.0855	3.97	-0.61	3.97
Shackleton	846D	9	5	105-107	84.85	95.25	81.1631	4.07	-0.78	4.07
Shackleton	846D	9	5	115-117	84.95	95.35	81.2448	4.16	-0.67	4.16
Shackleton	846D	9	5	125-127	85.05	95.45	81.3313	4.16	-0.77	4.16
Shackleton	846D	9	5	135-137	85.15	95.55	81.4218	4.03	-0.84	4.03
Shackleton	846D	9	5	145-147	85.25	95.65	81.519	3.96	-0.62	3.96
Shackleton	846D	9	6	5-7	85.35	95.75	81.6142	3.86	-0.55	3.86
Shackleton	846D	9	6	15-17	85.45	95.85	81.7006	3.92	-0.6	3.92
Shackleton	846D	9	6	25-27	85.55	95.95	81.7799	3.5	-0.03	3.5
Shackleton	846D	9	6	45-47	85.75	96.15	81.9312	3.41	-0.29	3.41
Shackleton	846D	9	6	55-57	85.85	96.25	82.0071	3.56	-0.46	3.56
Shackleton	846D	9	6	65-67	85.95	96.35	82.0826	3.69	-0.55	3.69
Shackleton	846D	9	6	75-77	86.05	96.45	82.1569	3.88	-0.69	3.88
Shackleton	846D	9	6	95-97	86.25	96.65	82.3051	4.03	-0.78	4.03
Shackleton	846C	9	5	95-97	85.45	96.7	82.3478	3.98	-0.84	3.98
Shackleton	846D	9	6	105-107	86.35	96.75	82.3795	4.18	-0.72	4.18
Shackleton	846C	9	5	105-107	85.55	96.8	82.4265	4.12	-0.79	4.12
Shackleton	846C	9	5	115-117	85.65	96.9	82.5053	4.09	-0.74	4.09
Shackleton	846C	9	5	125-127	85.75	97	82.584	4.09	-0.85	4.09
Shackleton	846C	9	5	135-137	85.85	97.1	82.6627	4.12	-0.72	4.12
Shackleton	846C	9	5	145-147	85.95	97.2	82.7579	4.06	-0.74	4.06
Shackleton	846C	9	6	5-7	86.05	97.3	82.8601	4.05	-0.89	4.05
Shackleton	846C	9	6	15-17	86.15	97.4	82.9623	3.85	-0.55	3.85
Shackleton	846C	9	6	25-27	86.25	97.5	83.0645	3.97	-0.84	3.97
Shackleton	846C	9	6	35-37	86.35	97.6	83.1667	3.83	-0.66	3.83
Shackleton	846C	9	6	45-47	86.45	97.7	83.2689	3.97	-0.64	3.97
Shackleton	846C	9	6	55-57	86.55	97.8	83.3711	3.71	-0.53	3.71
Shackleton	846C	9	6	65-67	86.65	97.9	83.4733	3.5	-1.5	3.5
Shackleton	846C	9	6	75-77	86.75	98	83.5755	3.53	-0.48	3.53
Shackleton	846C	9	6	85-87	86.85	98.1	83.6777	3.49	-0.1	3.49
Shackleton	846C	9	6	95-97	86.95	98.2	83.7799	3.41	-0.38	3.41
Shackleton	846C	9	6	105-107	87.05	98.3	83.8821	3.16		3.16
Shackleton	846C	9	6	115-117	87.15	98.4	83.9843	3.18	-0.13	3.18
Shackleton	846C	9	6	125-127	87.25	98.5	84.0865	3.13	-0.05	3.13
Shackleton	846D	10	1	15-17	87.45	98.75	84.325	3.47	-0.12	3.47
Shackleton	846D	10	1	25-27	87.55	98.85	84.4192	3.66	-0.06	3.66
Shackleton	846D	10	1	35-37	87.65	98.95	84.5147	3.6	-0.06	3.6
Shackleton	846D	10	1	45-47	87.75	99.05	84.6119	3.57	-0.25	3.57
Shackleton	846D	10	1	55-57	87.85	99.15	84.7097	3.44	-0.06	3.44
Shackleton	846D	10	1	75-77	88.05	99.35	84.8936	3.45	-0.25	3.45
Shackleton	846D	10	1	85-87	88.15	99.45	84.9802	3.42	-0.07	3.42
Shackleton	846D	10	1	95-97	88.25	99.55	85.067	3.44	-0.12	3.44
Shackleton	846D	10	1	105-107	88.35	99.65	85.1536	3.32	-0.2	3.32
Shackleton	846D	10	1	115-117	88.45	99.75	85.24	3.39	-0.28	3.39
Shackleton	846D	10	1	125-127	88.55	99.85	85.3229	3.18	-0.03	3.18
Shackleton	846D	10	1	135-137	88.65	99.95	85.4012	3.22	-0.06	3.22
Shackleton	846D	10	1	145-147	88.75	100.05	85.477	3.27	0.02	3.27
Shackleton	846D	10	2	5-7	88.85	100.15	85.5525	3.24	-0.16	3.24
Shackleton	846D	10	2	15-17	88.95	100.25	85.6297	3.25	-0.17	3.25
Shackleton	846D	10	2	25-27	89.05	100.35	85.7108	3.33	-0.2	3.33
Shackleton	846D	10	2	35-37	89.15	100.45	85.7976	3.28	-0.15	3.28
Shackleton	846D	10	2	45-47	89.25	100.55	85.8906	3.51	-0.28	3.51
Shackleton	846D	10	2	55-57	89.35	100.65	85.9876	3.71	-0.35	3.71
Shackleton	846D	10	2	65-67	89.45	100.75	86.0862	3.79	-0.58	3.79
Shackleton	846D	10	2	75-77	89.55	100.85	86.1838	3.73	-0.73	3.73
Shackleton	846D	10	2	85-87	89.65	100.95	86.2779	4.04	-0.74	4.04
Shackleton	846D	10	2	95-97	89.75	101.05	86.3666	4	-0.54	4
Shackleton	846D	10	2	105-107	89.85	101.15	86.4529	3.85	-0.61	3.85
Shackleton	846D	10	2	115-117	89.95	101.25	86.5397	3.91	-0.59	3.91
Shackleton	846D	10	2	125-127	90.05	101.35	86.6265	3.8	-0.46	3.8
Shackleton	846D	10	2	135-137	90.15	101.45	86.7132	3.91	-0.63	3.91
Shackleton	846D	10	2	145-147	90.25	101.55	86.8	3.69	-0.45	3.69
Shackleton	846D	10	3	5-7	90.35	101.65	86.8916	3.7	-0.34	3.7
Shackleton	846D	10	3	15-17	90.45	101.75	86.9882	3.55	-0.14	3.55
Shackleton	846D	10	3	25-27	90.55	101.85	87.0858	3.45	-0.04	3.45
Shackleton	846D	10	3	35-37	90.65	101.95	87.1814	3.37	-0.14	3.37
Shackleton	846D	10	3	45-47	90.75	102.05	87.2761	3.38		3.38
Shackleton	846D	10	3	55-57	90.85	102.15	87.3719	3.41		3.41
Shackleton	846D	10	3	65-67	90.95	102.25	87.4692	3.42	-0.15	3.42
Shackleton	846D	10	3	75-77	91.05	102.35	87.5645	3.28	0.06	3.28
Shackleton	846D	10	3	85-87	91.15	102.45	87.6547	3.33	-0.11	3.33
Shackleton	846D	10	3	95-97	91.25	102.55	87.7415	3.35	-0.06	3.35
Shackleton	846D	10	3	105-107	91.35	102.65	87.8283	3.56	-0.19	3.56
Shackleton	846D	10	3	115-117	91.45	102.75	87.9146	3.52	-0.26	3.52
Shackleton	846D	10	3	125-127	91.55	102.85	88.0011	4.27	-0.52	4.27
Shackleton	846D	10	3	135-137	91.65	102.95	88.088	3.38	-0.13	3.38
Shackleton	846D	10	3	145-147	91.75	103.05	88.1748	3.77	-0.4	3.77
Shackleton	846D	10	4	5-7	91.85	103.15	88.2613	3.76	-0.43	3.76
Shackleton	846D	10	4	15-17	91.95	103.25	88.3477	3.79	-0.36	3.79
Shackleton	846D	10	4	25-27	92.05	103.35	88.4354	3.6	-0.37	3.6
Shackleton	846D	10	4	35-37	92.15	103.45	88.5282	3.52		3.52
Shackleton	846D	10	4	45-47	92.25	103.55	88.6258	3.41	-0.33	3.41
Shackleton	846D	10	4	55-57	92.35	103.65	88.7192	3.23		3.23
Shackleton	846D	10	4	65-67	92.45	103.75	88.8053	3.05	-0.04	3.05
Shackleton	846D	10	4	75-77	92.55	103.85	88.887	3.17	0.11	3.17
Shackleton	846D	10	4	85-87	92.65	103.95	88.9644	3.19	0.08	3.19
Shackleton	846D	10	4	95-97	92.75	104.05	89.0407	3.27	0.08	3.27
Shackleton	846D	10	4	105-107	92.85	104.15	89.1182	3.14	0.12	3.14
Shackleton	846D	10	4	115-117	92.95	104.25	89.1966	3.36	-0.13	3.36
Shackleton	846D	10	4	125-127	93.05	104.35	89.275	3.29	-0.12	3.29
Shackleton	846D	10	4	135-137	93.15	104.45	89.3526	3.4	-0.26	3.4
Shackleton	846D	10	4	145-147	93.25	104.55	89.4292	3.43	-0.41	3.43
Shackleton	846D	10	5	5-7	93.35	104.65	89.5051	3.76	-0.65	3.76
Shackleton	846D	10	5	15-17	93.45	104.75	89.5807	3.88	-0.97	3.88
Shackleton	846D	10	5	25-27	93.55	104.85	89.6564	3.84		3.84
Shackleton	846D	10	5	35-37	93.65	104.95	89.7324	3.75	-0.41	3.75
Shackleton	846D	10	5	45-47	93.75	105.05	89.8084	3.61	-0.43	3.61
Shackleton	846D	10	5	55-57	93.85	105.15	89.884	3.46	-0.38	3.46
Shackleton	846D	10	5	65-67	93.95	105.25	89.9597	3.51	-0.24	3.51
Shackleton	846D	10	5	75-77	94.05	105.35	90.0359	3.56	-0.32	3.56
Shackleton	846D	10	5	85-87	94.15	105.45	90.1128	3.6	-0.35	3.6
Shackleton	846D	10	5	95-97	94.25	105.55	90.1906	3.8	-0.49	3.8
Shackleton	846D	10	5	105-107	94.35	105.65	90.2688	3.77	-0.55	3.77
Shackleton	846D	10	5	115-117	94.45	105.75	90.3468	3.71	-0.59	3.71
Shackleton	846D	10	5	125-127	94.55	105.85	90.4241	3.65	-1.18	3.65
Shackleton	846D	10	5	135-137	94.65	105.95	90.5004	3.84		3.84
Shackleton	846D	10	5	145-147	94.75	106.05	90.5779	3.83		3.83
Shackleton	846D	10	6	5-7	94.85	106.15	90.6593	3.88	-0.82	3.88
Shackleton	846D	10	6	15-17	94.95	106.25	90.7462	3.59	-0.77	3.59
Shackleton	846D	10	6	25-27	95.05	106.35	90.8385	3.65	-0.49	3.65
Shackleton	846D	10	6	35-37	95.15	106.45	90.9353	3.5	-0.09	3.5
Shackleton	846D	10	6	45-47	95.25	106.55	91.0331	3.47		3.47
Shackleton	846D	10	6	55-57	95.35	106.65	91.13	4.04		4.04
Shackleton	846D	10	6	65-67	95.45	106.75	91.2261	3.32	-0.62	3.32
Shackleton	846D	10	6	75-77	95.55	106.85	91.3219	3.4	-0.27	3.4
Shackleton	846D	10	6	85-87	95.65	106.95	91.4179	3.66	-0.56	3.66
Shackleton	846D	10	6	95-97	95.75	107.05	91.5145	3.6	-0.42	3.6
Shackleton	846D	10	6	105-107	95.85	107.15	91.6119	3.7	-0.16	3.7
Shackleton	846D	10	6	115-117	95.95	107.25	91.7098	3.6	-0.36	3.6
Shackleton	846D	10	6	125-127	96.05	107.35	91.808	3.58	-0.32	3.58
Shackleton	846D	10	6	135-137	96.15	107.45	91.9069	3.46	-0.24	3.46
Shackleton	846D	10	6	145-147	96.25	107.55	92.0072	3.96		3.96
Shackleton	846D	10	7	5-7	96.35	107.65	92.109	3.78		3.78
Shackleton	846D	10	7	15-17	96.45	107.75	92.2122	3.57		3.57
Shackleton	846D	10	7	25-27	96.55	107.85	92.3161	3.53	-0.47	3.53
Shackleton	846D	10	7	35-37	96.65	107.95	92.4204	2.88	0.11	2.88
Shackleton	846D	10	7	45-47	96.75	108.05	92.5248	3.02	-0.12	3.02
Shackleton	846D	10	7	55-57	96.85	108.15	92.627	2.86	0.16	2.86
Shackleton	846D	10	7	65-67	96.95	108.25	92.7276	3.04	-0.09	3.04
Shackleton	846D	10	7	75-77	97.05	108.35	92.8287	3	0.19	3
Shackleton	846D	10	H	5-7	97.22	108.52	92.9981	3.14	0.23	3.14
Shackleton	846D	10	H	15-17	97.32	108.62	93.0978	3.04	0.09	3.04
Shackleton	846C	10	5	105-107	95.05	108.7	93.1528	3.38	-0.17	3.38
Shackleton	846C	10	5	115-117	95.15	108.8	93.2423	3.21	-0.07	3.21
Shackleton	846C	10	5	125-127	95.25	108.9	93.3317	3.22	-0.01	3.22
Shackleton	846C	10	5	135-137	95.35	109	93.4212	3.47	-0.56	3.47
Shackleton	846C	10	5	145-147	95.45	109.1	93.5106	3.33	-0.2	3.33
Shackleton	846C	10	6	5-7	95.55	109.2	93.6001	3.41	-0.02	3.41
Shackleton	846C	10	6	15-17	95.65	109.3	93.6895	3.41	-0.32	3.41
Shackleton	846C	10	6	25-27	95.75	109.4	93.7784	3.57	-0.12	3.57
Shackleton	846D	11	1	25-27	97.05	109.45	93.9074	3.32		3.32
Shackleton	846D	11	1	35-37	97.15	109.55	94.0034	3.19	-0.05	3.19
Shackleton	846D	11	1	45-47	97.25	109.65	94.1005	3.16	-0.02	3.16
Shackleton	846D	11	1	55-57	97.35	109.75	94.1973	3.15	-0.06	3.15
Shackleton	846D	11	1	65-67	97.45	109.85	94.2937	3.27	-0.03	3.27
Shackleton	846D	11	1	75-77	97.55	109.95	94.3899	3.5	-0.16	3.5
Shackleton	846D	11	1	85-87	97.65	110.05	94.4861	3.22	-0.31	3.22
Shackleton	846D	11	1	95-97	97.75	110.15	94.5822	3.33	-0.17	3.33
Shackleton	846D	11	1	105-107	97.85	110.25	94.6782	3.36	-0.28	3.36
Shackleton	846D	11	1	115-117	97.95	110.35	94.7745	3.65	-0.59	3.65
Shackleton	846D	11	1	125-127	98.05	110.45	94.8717	3.33	-0.42	3.33
Shackleton	846D	11	1	135-137	98.15	110.55	94.9694	3.64	-0.62	3.64
Shackleton	846D	11	1	145-147	98.25	110.65	95.0647	4.04		4.04
Shackleton	846D	11	2	5-7	98.35	110.75	95.155	3.66	-0.09	3.66
Shackleton	846D	11	2	15-17	98.45	110.85	95.2418	3.78		3.78
Shackleton	846D	11	2	25-27	98.55	110.95	95.3278	3.78		3.78
Shackleton	846D	11	2	35-37	98.65	111.05	95.4147	3.64	-0.36	3.64
Shackleton	846D	11	2	45-47	98.75	111.15	95.5012	3.49	0.01	3.49
Shackleton	846D	11	2	55-57	98.85	111.25	95.5852	3.39	0.08	3.39
Shackleton	846D	11	2	65-67	98.95	111.35	95.6625	3.48	0.14	3.48
Shackleton	846D	11	2	75-77	99.05	111.45	95.7401	3.29	0.01	3.29
Shackleton	846D	11	2	95-97	99.25	111.65	95.9094	3.3	-0.17	3.3
Shackleton	846D	11	2	105-107	99.35	111.75	95.9956	3.33	-0.01	3.33
Shackleton	846D	11	2	115-117	99.45	111.85	96.0826	3.3	-0.02	3.3
Shackleton	846D	11	2	125-127	99.55	111.95	96.1715	3.54	-0.05	3.54
Shackleton	846D	11	2	135-137	99.65	112.05	96.2656	3.36	0.01	3.36
Shackleton	846D	11	2	145-147	99.75	112.15	96.3635	3.51	-0.11	3.51
Shackleton	846D	11	3	5-7	99.85	112.25	96.4625	3.62	0.2	3.62
Shackleton	846D	11	3	15-17	99.95	112.35	96.5596	3.44	-0.12	3.44
Shackleton	846D	11	3	25-27	100.05	112.45	96.6522	3.45	-0.09	3.45
Shackleton	846D	11	3	35-37	100.15	112.55	96.7396	3.65	-0.15	3.65
Shackleton	846D	11	3	45-47	100.25	112.65	96.8258	3.59	-0.25	3.59
Shackleton	846D	11	3	55-57	100.35	112.75	96.9127	3.45	-0.28	3.45
Shackleton	846D	11	3	65-67	100.45	112.85	96.9994	3.67	-0.23	3.67
Shackleton	846D	11	3	75-77	100.55	112.95	97.0849	3.31	0.07	3.31
Shackleton	846D	11	3	85-87	100.65	113.05	97.1653	3.35	-0.23	3.35
Shackleton	846D	11	3	95-97	100.75	113.15	97.2422	3.28	0.12	3.28
Shackleton	846D	11	3	105-107	100.85	113.25	97.3186	3.25	0.11	3.25
Shackleton	846D	11	3	115-117	100.95	113.35	97.3965	3.3	0.05	3.3
Shackleton	846D	11	3	125-127	101.05	113.45	97.4755	3.11	0.03	3.11
Shackleton	846D	11	3	135-137	101.15	113.55	97.555	3.4	-0.3	3.4
Shackleton	846D	11	3	145-147	101.25	113.65	97.6342	3.2	-0.33	3.2
Shackleton	846D	11	4	5-7	101.35	113.75	97.713	3.23	-0.41	3.23
Shackleton	846D	11	4	15-17	101.45	113.85	97.7912	3.29	-0.38	3.29
Shackleton	846D	11	4	25-27	101.55	113.95	97.8689	3.3	-0.43	3.3
Shackleton	846D	11	4	35-37	101.65	114.05	97.947	3.49	-0.55	3.49
Shackleton	846D	11	4	45-47	101.75	114.15	98.0272	3.62	-0.63	3.62
Shackleton	846D	11	4	55-57	101.85	114.25	98.1126	3.6	-0.57	3.6
Shackleton	846D	11	4	65-67	101.95	114.35	98.2082	3.72	-0.31	3.72
Shackleton	846D	11	4	75-77	102.05	114.45	98.3059	3.69	-0.4	3.69
Shackleton	846D	11	4	85-87	102.15	114.55	98.3967	3.47	-0.43	3.47
Shackleton	846D	11	4	95-97	102.25	114.65	98.4832	3.5	-0.42	3.5
Shackleton	846D	11	4	105-107	102.35	114.75	98.5695	3.47	-0.39	3.47
Shackleton	846D	11	4	115-117	102.45	114.85	98.6563	3.4	-0.35	3.4
Shackleton	846D	11	4	125-127	102.55	114.95	98.742	3.37	0.19	3.37
Shackleton	846D	11	4	135-137	102.65	115.05	98.8228	3.31	-0.4	3.31
Shackleton	846D	11	4	145-147	102.75	115.15	98.8998	3.29	-0.24	3.29
Shackleton	846D	11	5	5-7	102.85	115.25	98.976	3.27	-0.49	3.27
Shackleton	846D	11	5	15-17	102.95	115.35	99.0534	3.22	-0.59	3.22
Shackleton	846D	11	5	25-27	103.05	115.45	99.1316	3.34	-0.4	3.34
Shackleton	846D	11	5	35-37	103.15	115.55	99.2098	3.27	-0.3	3.27
Shackleton	846D	11	5	45-47	103.25	115.65	99.2874	3.3	-0.62	3.3
Shackleton	846D	11	5	55-57	103.35	115.75	99.3642	3.33	-0.17	3.33
Shackleton	846D	11	5	65-67	103.45	115.85	99.4404	3.36	-0.38	3.36
Shackleton	846D	11	5	75-77	103.55	115.95	99.516	3.48	-0.47	3.48
Shackleton	846D	11	5	85-87	103.65	116.05	99.5913	3.52	-0.38	3.52
Shackleton	846D	11	5	95-97	103.75	116.15	99.666	3.51	-0.24	3.51
Shackleton	846D	11	5	105-107	103.85	116.25	99.7394	3.46	-0.32	3.46
Shackleton	846D	11	5	115-117	103.95	116.35	99.8113	3.56	-0.57	3.56
Shackleton	846D	11	5	125-127	104.05	116.45	99.8833	3.66	-0.69	3.66
Shackleton	846D	11	5	135-137	104.15	116.55	99.9557	3.64	-0.5	3.64
Shackleton	846D	11	5	145-147	104.25	116.65	100.028	3.6	-0.56	3.6
Shackleton	846D	11	6	5-7	104.35	116.75	100.1	3.56	-0.76	3.56
Shackleton	846D	11	6	15-17	104.45	116.85	100.172	3.5	-0.73	3.5
Shackleton	846D	11	6	25-27	104.55	116.95	100.244	3.25	-0.8	3.25
Shackleton	846D	11	6	35-37	104.65	117.05	100.317	3.3	-0.53	3.3
Shackleton	846D	11	6	45-47	104.75	117.15	100.39	3.18	-0.47	3.18
Shackleton	846D	11	6	55-57	104.85	117.25	100.464	3.15	-0.37	3.15
Shackleton	846D	11	6	65-67	104.95	117.35	100.538	3.21	-0.36	3.21
Shackleton	846D	11	6	75-77	105.05	117.45	100.613	2.84	-0.3	2.84
Shackleton	846D	11	6	85-87	105.15	117.55	100.688	3.05	-0.11	3.05
Shackleton	846D	11	6	95-97	105.25	117.65	100.763	3.07	-0.31	3.07
Shackleton	846D	11	6	105-107	105.35	117.75	100.839	2.99	-0.19	2.99
Shackleton	846D	11	6	115-117	105.45	117.85	100.915	3.12	-0.23	3.12
Shackleton	846D	11	6	125-127	105.55	117.95	100.992	3.24	-0.33	3.24
Shackleton	846C	11	5	35-37	103.85	117.95	101.028	3.33		3.33
Shackleton	846D	11	6	135-137	105.65	118.05	101.067	3.26	-0.11	3.26
Shackleton	846C	11	5	45-47	103.95	118.05	101.112	3.43	-0.14	3.43
Shackleton	846D	11	6	145-147	105.75	118.15	101.143	3.17	-0.01	3.17
Shackleton	846C	11	5	55-57	104.05	118.15	101.215	3.24	-0.01	3.24
Shackleton	846D	11	7	5-7	105.85	118.25	101.218	3.2	-0.37	3.2
Shackleton	846C	11	5	65-67	104.15	118.25	101.27	3.25	-0.31	3.25
Shackleton	846D	11	7	15-17	105.95	118.35	101.305	3.33	-0.07	3.33
Shackleton	846C	11	5	75-77	104.25	118.35	101.42	3.19	-0.39	3.19
Shackleton	846C	11	5	85-87	104.35	118.45	101.627	3.49	-0.2	3.49
Shackleton	846C	11	5	95-97	104.45	118.55	101.834	3.26	-0.2	3.26
Shackleton	846C	11	5	105-107	104.55	118.65	102.018	3.26	-0.32	3.26
Shackleton	846C	11	5	115-117	104.65	118.75	102.108	3.44	-0.37	3.44
Shackleton	846C	11	5	125-127	104.75	118.85	102.198	3.51	-0.32	3.51
Shackleton	846C	11	5	135-137	104.85	118.95	102.288	3.24	0.02	3.24
Shackleton	846C	11	5	145-147	104.95	119.05	102.378	3.3	0	3.3
Shackleton	846C	11	6	5-7	105.05	119.15	102.468	3.13	-0.01	3.13
Shackleton	846C	11	6	15-17	105.15	119.25	102.558	2.75		2.75
Shackleton	846C	11	6	25-27	105.25	119.35	102.648	3.12	-0.31	3.12
Shackleton	846C	11	6	35-37	105.35	119.45	102.738	2.86	-0.21	2.86
Shackleton	846C	11	6	45-47	105.45	119.55	102.834	2.89	-0.11	2.89
Shackleton	846C	11	6	55-57	105.55	119.65	102.953	2.99	-0.18	2.99
Shackleton	846C	11	6	65-67	105.65	119.75	103.073	3.04	-0.32	3.04
Shackleton	846C	11	6	75-77	105.75	119.85	103.192	2.98	-0.33	2.98
Shackleton	846C	11	6	85-87	105.85	119.95	103.298	3.28	-0.2	3.28
Shackleton	846D	12	1	25-27	106.55	120.05	103.451	3.33	-0.23	3.33
Shackleton	846D	12	1	35-37	106.65	120.15	103.537	3.42	-0.16	3.42
Shackleton	846D	12	1	45-47	106.75	120.25	103.624	3.41	-0.2	3.41
Shackleton	846D	12	1	55-57	106.85	120.35	103.71	3.37	-0.2	3.37
Shackleton	846D	12	1	65-67	106.95	120.45	103.797	3.77		3.77
Shackleton	846D	12	1	75-77	107.05	120.55	103.883	3.38	-0.42	3.38
Shackleton	846D	12	1	85-87	107.15	120.65	103.97	3.61	-0.38	3.61
Shackleton	846D	12	1	95-97	107.25	120.75	104.057	3.35	-0.52	3.35
Shackleton	846D	12	1	105-107	107.35	120.85	104.144	3.34	-0.56	3.34
Shackleton	846D	12	1	115-117	107.45	120.95	104.23	3.36	-0.48	3.36
Shackleton	846D	12	1	125-127	107.55	121.05	104.32	3.42	-0.45	3.42
Shackleton	846D	12	1	135-137	107.65	121.15	104.415	3.35	-0.64	3.35
Shackleton	846D	12	1	145-147	107.75	121.25	104.511	3.23	-0.41	3.23
Brown	846B	12	4	3	106.52	121.32	104.575	3.4795	-0.459	3.3345
Shackleton	846D	12	2	5-7	107.85	121.35	104.607	3.3	-0.27	3.3
Brown	846B	12	4	13	106.62	121.42	104.667	3.281	-0.2115	3.136
Shackleton	846D	12	2	15-17	107.95	121.45	104.702	2.87	-0.18	2.87
Brown	846B	12	4	23	106.72	121.52	104.762	3.2725	-0.387	3.1275
Shackleton	846D	12	2	25-27	108.05	121.55	104.797	2.99	-0.42	2.99
Brown	846B	12	4	33	106.82	121.62	104.857	3.237	-0.456	3.092
Shackleton	846D	12	2	35-37	108.15	121.65	104.894	3.02	-0.59	3.02
Brown	846B	12	4	43	106.92	121.72	104.945	3.2945	-0.45	3.1495
Shackleton	846D	12	2	45-47	108.25	121.75	104.992	3	-0.55	3
Brown	846B	12	4	53	107.02	121.82	105.031	3.334	-0.4205	3.189
Shackleton	846D	12	2	55-57	108.35	121.85	105.084	3.04	-0.48	3.04
Brown	846B	12	4	63	107.12	121.92	105.118	3.32	-0.612	3.175
Shackleton	846D	12	2	65-67	108.45	121.95	105.172	3.19	-0.46	3.19
Brown	846B	12	4	73	107.22	122.02	105.203	3.381	-0.424	3.236
Shackleton	846D	12	2	75-77	108.55	122.05	105.256	3.14	-0.54	3.14
Brown	846B	12	4	83	107.32	122.12	105.294	3.554	-0.2145	3.409
Shackleton	846D	12	2	85-87	108.65	122.15	105.336	3.39	-0.46	3.39
Brown	846B	12	4	93	107.42	122.22	105.389	3.571	-0.419	3.426
Shackleton	846D	12	2	95-97	108.75	122.25	105.413	3.17	-0.37	3.17
Brown	846B	12	4	103	107.52	122.32	105.484	3.589	-0.57775	3.444
Shackleton	846D	12	2	105-107	108.85	122.35	105.489	3.5	-0.46	3.5
Shackleton	846D	12	2	115-117	108.95	122.45	105.565	3.26	-0.66	3.26
Brown	846B	12	4	113	107.62	122.42	105.579	3.41925	-0.51475	3.27425
Shackleton	846D	12	2	125-127	109.05	122.55	105.644	2.97	-0.54	2.97
Brown	846B	12	4	123	107.72	122.52	105.674	3.322	-0.29075	3.177
Shackleton	846D	12	2	135-137	109.15	122.65	105.728	3.03	-0.53	3.03
Brown	846B	12	4	133	107.82	122.62	105.768	3.26525	-0.34875	3.12025
Shackleton	846D	12	2	145-147	109.25	122.75	105.815	3.23	-0.31	3.23
Shackleton	846D	12	3	5-7	109.35	122.85	105.904	2.88	-0.14	2.88
Brown	846B	12	5	3	108.02	122.82	105.958	3.281	-0.59	3.136
Shackleton	846D	12	3	15-17	109.45	122.95	106	2.94	-0.31	2.94
Brown	846B	12	5	13	108.12	122.92	106.053	3.163	-0.0965	3.018
Shackleton	846D	12	3	25-27	109.55	123.05	106.097	3.06	-0.44	3.06
Shackleton	846D	12	3	35-37	109.65	123.15	106.186	2.95	-0.8	2.95
Brown	846B	12	5	33	108.33	123.13	106.243	3.478	-0.349	3.333
Shackleton	846D	12	3	45-47	109.75	123.25	106.269	2.86	-0.22	2.86
Shackleton	846D	12	3	55-57	109.85	123.35	106.346	3.04		3.04
Shackleton	846D	12	3	65-67	109.95	123.45	106.424	3.01	0.02	3.01
Brown	846B	12	5	53	108.53	123.33	106.433	3.18733	0.107	3.04233
Shackleton	846D	12	3	75-77	110.05	123.55	106.508	3.02	-0.1	3.02
Shackleton	846D	12	3	85-87	110.15	123.65	106.595	3.01	-0.2	3.01
Shackleton	846D	12	3	95-97	110.25	123.75	106.688	3.29	0.17	3.29
Shackleton	846D	12	3	105-107	110.35	123.85	106.785	3.18	0.11	3.18
Brown	846B	12	5	93	108.93	123.73	106.794	3.213	-0.065	3.068
Brown	846B	12	5	103	109.03	123.83	106.88	3.294	-0.282	3.149
Shackleton	846D	12	3	115-117	110.45	123.95	106.883	3.22	0.18	3.22
Brown	846B	12	5	113	109.13	123.93	106.966	3.267	0.147	3.122
Shackleton	846D	12	3	125-127	110.55	124.05	106.978	3.3	0.16	3.3
Brown	846B	12	5	123	109.23	124.03	107.053	3.377	-0.148	3.232
Shackleton	846D	12	3	135-137	110.65	124.15	107.073	3.18	0.09	3.18
Brown	846B	12	5	133	109.33	124.13	107.139	3.35933	-0.0456667	3.21433
Shackleton	846D	12	3	145-147	110.75	124.25	107.169	3.33	0.18	3.33
Brown	846B	12	5	143	109.43	124.23	107.225	3.28	0.02	3.135
Shackleton	846D	12	4	5-7	110.85	124.35	107.265	3.1	0.13	3.1
Brown	846B	12	6	3	109.53	124.33	107.312	3.27175	-0.1315	3.12675
Shackleton	846D	12	4	15-17	110.95	124.45	107.36	2.98	-0.14	2.98
Brown	846B	12	6	13	109.63	124.43	107.407	3.262	-0.157	3.117
Shackleton	846D	12	4	25-27	111.05	124.55	107.45	3.23	-0.09	3.23
Brown	846B	12	6	23	109.73	124.53	107.501	3.401	-0.365	3.256
Shackleton	846D	12	4	35-37	111.15	124.65	107.536	3.19	-0.4	3.19
Brown	846B	12	6	33	109.83	124.63	107.595	3.26833	-0.11	3.12333
Shackleton	846D	12	4	45-47	111.25	124.75	107.622	3.39	-0.04	3.39
Brown	846B	12	6	43	109.93	124.73	107.681	3.446	-0.206	3.301
Shackleton	846D	12	4	55-57	111.35	124.85	107.703	3.2	-0.27	3.2
Brown	846B	12	6	53	110.03	124.83	107.767	3.38467	-0.280333	3.23967
Shackleton	846D	12	4	65-67	111.45	124.95	107.781	3.24	-0.18	3.24
Brown	846B	12	6	63	110.13	124.93	107.854	3.46167	-0.251667	3.31667
Shackleton	846D	12	4	75-77	111.55	125.05	107.858	3.22	-0.11	3.22
Brown	846B	12	6	73	110.23	125.03	107.934	3.47833	-0.4295	3.33333
Shackleton	846D	12	4	85-87	111.65	125.15	107.935	3.6	-0.27	3.6
Brown	846B	12	6	83	110.33	125.13	108.013	3.496	-0.3425	3.351
Shackleton	846D	12	4	95-97	111.75	125.25	108.014	3.21	-0.25	3.21
Brown	846B	12	6	93	110.43	125.23	108.091	3.544	-0.41925	3.399
Shackleton	846D	12	4	105-107	111.85	125.35	108.093	3.22	-0.29	3.22
Brown	846B	12	6	103	110.53	125.33	108.169	3.52167	-0.516667	3.37667
Shackleton	846D	12	4	115-117	111.95	125.45	108.172	3.62	-0.35	3.62
Brown	846B	12	6	113	110.63	125.43	108.248	3.62167	-0.457333	3.47667
Shackleton	846D	12	4	125-127	112.05	125.55	108.25	3.69	-0.33	3.69
Brown	846B	12	6	123	110.73	125.53	108.326	3.6205	-0.61025	3.4755
Shackleton	846D	12	4	135-137	112.15	125.65	108.329	3.82	-0.44	3.82
Brown	846B	12	6	133	110.83	125.63	108.405	3.57967	-0.662667	3.43467
Shackleton	846D	12	4	145-147	112.25	125.75	108.408	3.62		3.62
Brown	846B	12	6	143	110.93	125.73	108.483	3.67	-0.8335	3.525
Shackleton	846D	12	5	5-7	112.35	125.85	108.488	3.46	-0.48	3.46
Brown	846B	12	7	3	111.03	125.83	108.561	3.623	-0.68	3.478
Shackleton	846D	12	5	15-17	112.45	125.95	108.566	3.54	-0.58	3.54
Brown	846B	12	7	13	111.13	125.93	108.639	3.535	-0.408333	3.39
Shackleton	846D	12	5	25-27	112.55	126.05	108.643	3.4	-0.25	3.4
Brown	846B	12	7	23	111.23	126.03	108.718	3.38267	-0.244667	3.23767
Shackleton	846D	12	5	35-37	112.65	126.15	108.72	3.37	-0.49	3.37
Brown	846B	12	7	33	111.33	126.13	108.796	3.5395	-0.322	3.3945
Shackleton	846D	12	5	45-47	112.75	126.25	108.799	3.69	-0.27	3.69
Brown	846B	12	7	43	111.43	126.23	108.875	3.16767	-0.166667	3.02267
Shackleton	846D	12	5	55-57	112.85	126.35	108.883	3.13	-0.51	3.13
Brown	846B	12	CC	3	111.53	126.33	108.963	3.065	-0.214333	2.92
Shackleton	846D	12	5	65-67	112.95	126.45	108.97	3		3
Brown	846B	12	CC	13	111.63	126.43	109.052	3.039	-0.063	2.894
Shackleton	846D	12	5	75-77	113.05	126.55	109.056	2.95	0	2.95
Brown	846B	12	CC	23	111.73	126.53	109.141	3.207	-0.096	3.062
Shackleton	846D	12	5	85-87	113.15	126.65	109.147	3.04		3.04
Shackleton	846D	12	5	95-97	113.25	126.75	109.243	3.11		3.11
Shackleton	846D	12	5	105-107	113.35	126.85	109.341	3.33	-0.1	3.33
Shackleton	846D	12	5	115-117	113.45	126.95	109.437	3.56		3.56
Shackleton	846D	12	5	125-127	113.55	127.05	109.532	3.13		3.13
Shackleton	846D	12	5	135-137	113.65	127.15	109.627	3.06	-0.05	3.06
Shackleton	846D	12	6	5-7	113.85	127.35	109.818	3.46	-0.14	3.46
Shackleton	846D	12	6	15-17	113.95	127.45	109.914	3.26	-0.05	3.26
Shackleton	846D	12	6	25-27	114.05	127.55	110.009	3.31	-0.02	3.31
Shackleton	846D	12	6	35-37	114.15	127.65	110.105	3.08	0.16	3.08
Shackleton	846D	12	6	45-47	114.25	127.75	110.199	3.06	0.1	3.06
Shackleton	846D	12	6	55-57	114.35	127.85	110.294	3.22	0.14	3.22
Shackleton	846D	12	6	65-67	114.45	127.95	110.39	3.22	0.09	3.22
Brown	846B	13	1	23	111.73	128.18	110.482	3.24167	0.102667	3.09667
Shackleton	846D	12	6	75-77	114.55	128.05	110.487	3.1	-0.05	3.1
Brown	846B	13	1	33	111.83	128.28	110.56	3.294	-0.0126667	3.149
Shackleton	846D	12	6	85-87	114.65	128.15	110.585	3.32	-0.16	3.32
Brown	846B	13	1	43	111.93	128.38	110.637	3.234	0.1195	3.089
Shackleton	846D	12	6	95-97	114.75	128.25	110.679	3.09	0.16	3.09
Brown	846B	13	1	53	112.03	128.48	110.714	3.17767	0.0806667	3.03267
Shackleton	846D	12	6	105-107	114.85	128.35	110.767	3.27	0.02	3.27
Brown	846B	13	1	63	112.13	128.58	110.792	3.189	0.128	3.044
Shackleton	846D	12	6	115-117	114.95	128.45	110.853	3.15	0.22	3.15
Brown	846B	13	1	73	112.23	128.68	110.869	3.284	-0.0586667	3.139
Shackleton	846D	12	6	125-127	115.05	128.55	110.939	3.13	0.09	3.13
Brown	846B	13	1	83	112.33	128.78	110.947	3.295	0.075	3.15
Shackleton	846D	12	6	135-137	115.15	128.65	111.023	3.23	-0.08	3.23
Brown	846B	13	1	93	112.43	128.88	111.024	3.323	0.0435	3.178
Shackleton	846D	12	6	143-145	115.23	128.73	111.086	3.05	0	3.05
Brown	846B	13	1	103	112.53	128.98	111.102	3.239	0.002	3.094
Shackleton	846D	12	7	5-7	115.35	128.85	111.178	3.07	0.14	3.07
Brown	846B	13	1	113	112.63	129.08	111.18	3.42	0.053	3.275
Shackleton	846D	12	7	15-17	115.45	128.95	111.255	3.12	0.22	3.12
Brown	846B	13	1	123	112.73	129.18	111.258	3.367	-0.047	3.222
Shackleton	846D	12	7	25-27	115.55	129.05	111.332	3.09	0.11	3.09
Brown	846B	13	1	133	112.83	129.28	111.335	3.3015	-0.0085	3.1565
Brown	846B	13	1	143	112.93	129.38	111.413	3.1875	0.1645	3.0425
Shackleton	846D	12	7	35-37	115.65	129.15	111.413	3.19	0	3.19
Brown	846B	13	2	3	113.03	129.48	111.491	3.2495	0.1895	3.1045
Brown	846B	13	2	13	113.13	129.58	111.569	3.193	-0.222	3.048
Brown	846B	13	2	23	113.23	129.68	111.647	3.272	0.0865	3.127
Brown	846B	13	2	33	113.33	129.78	111.729	3.296	0.105	3.151
Brown	846B	13	2	43	113.43	129.88	111.824	3.244	0.021	3.099
Brown	846B	13	2	53	113.53	129.98	111.919	3.356	-0.047	3.211
Brown	846B	13	2	63	113.63	130.08	112.014	3.1615	0.0195	3.0165
Brown	846B	13	2	73	113.73	130.18	112.109	3.183	0.013	3.038
Brown	846B	13	2	93	113.93	130.38	112.296	3.3925	0.1295	3.2475
Brown	846B	13	2	103	114.03	130.48	112.382	3.496	-0.1115	3.351
Brown	846B	13	2	113	114.13	130.58	112.469	3.5185	-0.0275	3.3735
Brown	846B	13	2	133	114.33	130.78	112.629	3.45429	-0.21875	3.30929
Brown	846B	13	2	143	114.43	130.88	112.707	3.41829	-0.27925	3.27329
Brown	846B	13	3	3	114.53	130.98	112.786	3.511	0.083	3.366
Brown	846B	13	3	13	114.63	131.08	112.864	3.384	0.029	3.239
Brown	846B	13	3	23	114.73	131.18	112.943	3.35521	0.08	3.21021
Brown	846B	13	3	33	114.83	131.28	113.022	3.37419	-0.266	3.22919
Brown	846B	13	3	43	114.93	131.38	113.109	3.42	-0.0575	3.275
Brown	846B	13	3	53	115.03	131.48	113.194	3.48142	-0.223	3.33642
Brown	846B	13	3	63	115.13	131.58	113.281	3.66252	-0.391	3.51752
Brown	846B	13	3	73	115.23	131.68	113.362	3.75129	-0.3645	3.60629
Brown	846B	13	3	83	115.33	131.78	113.441	3.61725	-0.371	3.47225
Brown	846B	13	3	93	115.43	131.88	113.519	3.997	-0.679333	3.852
Shackleton	846D	13	2	5-7	117.35	131.95	113.56	3.77	-0.56	3.77
Brown	846B	13	3	103	115.53	131.98	113.602	3.86933	-0.420667	3.72433
Shackleton	846D	13	2	15-17	117.45	132.05	113.636	3.66	-0.43	3.66
Brown	846B	13	3	113	115.63	132.08	113.697	3.89017	-0.623833	3.74517
Shackleton	846D	13	2	25-27	117.55	132.15	113.711	3.85	-0.63	3.85
Shackleton	846D	13	2	35-37	117.65	132.25	113.789	3.55	-0.68	3.55
Brown	846B	13	3	123	115.73	132.18	113.792	3.84171	-0.632857	3.69671
Shackleton	846D	13	2	45-47	117.75	132.35	113.872	3.62	-0.57	3.62
Brown	846B	13	3	133	115.83	132.28	113.887	3.7852	-0.5504	3.6402
Shackleton	846D	13	2	55-57	117.85	132.45	113.963	3.62	-0.59	3.62
Brown	846B	13	3	143	115.93	132.38	113.983	3.7485	-0.60725	3.6035
Shackleton	846D	13	2	65-67	117.95	132.55	114.06	3.64	-0.56	3.64
Brown	846B	13	4	3	116.03	132.48	114.079	3.70238	-0.7045	3.55738
Shackleton	846D	13	2	75-77	118.05	132.65	114.159	3.45	-0.54	3.45
Brown	846B	13	4	13	116.13	132.58	114.176	3.737	-0.736	3.592
Shackleton	846D	13	2	85-87	118.15	132.75	114.258	3.55	-0.5	3.55
Brown	846B	13	4	23	116.23	132.68	114.273	3.711	-0.604	3.566
Shackleton	846D	13	2	95-97	118.25	132.85	114.353	3.44	-0.56	3.44
Brown	846B	13	4	33	116.33	132.78	114.37	3.64011	-0.4925	3.49511
Shackleton	846D	13	2	105-107	118.35	132.95	114.443	3.38	-0.37	3.38
Brown	846B	13	4	43	116.43	132.88	114.469	3.53817	-0.470333	3.39317
Shackleton	846D	13	2	115-117	118.45	133.05	114.53	3.39	-0.39	3.39
Brown	846B	13	4	53	116.53	132.98	114.568	3.4838	-0.3842	3.3388
Shackleton	846D	13	2	125-127	118.55	133.15	114.617	3.64	-0.1	3.64
Brown	846B	13	4	63	116.63	133.08	114.669	3.2485	-0.30525	3.1035
Shackleton	846D	13	2	135-137	118.65	133.25	114.702	3.07	-0.03	3.07
Brown	846B	13	4	73	116.73	133.18	114.769	3.28825	-0.439	3.14325
Shackleton	846D	13	2	145-147	118.75	133.35	114.787	3.28	-0.15	3.28
Shackleton	846D	13	3	5-7	118.85	133.45	114.866	3.16	-0.29	3.16
Brown	846B	13	4	83	116.83	133.28	114.87	3.251	-0.404	3.106
Shackleton	846D	13	3	15-17	118.95	133.55	114.943	3.15		3.15
Brown	846B	13	4	93	116.93	133.38	114.971	3.0965	-0.3285	2.9515
Shackleton	846D	13	3	25-27	119.05	133.65	115.018	3.17	-0.23	3.17
Brown	846B	13	4	103	117.03	133.48	115.072	3.3375	-0.5755	3.1925
Shackleton	846D	13	3	35-37	119.15	133.75	115.093	3.19	-0.3	3.19
Brown	846B	13	4	113	117.13	133.58	115.172	3.3225	-0.402	3.1775
Shackleton	846D	13	3	45-47	119.25	133.85	115.173	3.14	-0.28	3.14
Shackleton	846D	13	3	55-57	119.35	133.95	115.259	3.23	-0.48	3.23
Shackleton	846D	13	3	65-67	119.45	134.05	115.345	3.14	-0.11	3.14
Brown	846B	13	4	133	117.33	133.78	115.371	3.366	-0.574	3.221
Shackleton	846D	13	3	75-77	119.55	134.15	115.434	3.17	-0.12	3.17
Brown	846B	13	4	143	117.43	133.88	115.469	3.3145	-0.411	3.1695
Shackleton	846D	13	3	85-87	119.65	134.25	115.528	3.57		3.57
Brown	846B	13	5	3	117.53	133.98	115.567	3.3315	-0.296	3.1865
Shackleton	846D	13	3	95-97	119.75	134.35	115.627	3.18	-0.11	3.18
Brown	846B	13	5	13	117.63	134.08	115.666	3.307	-0.3275	3.162
Shackleton	846D	13	3	105-107	119.85	134.45	115.726	3.29	-0.05	3.29
Brown	846B	13	5	23	117.73	134.18	115.765	3.374	-0.42	3.229
Shackleton	846D	13	3	115-117	119.95	134.55	115.823	3.17	-0.06	3.17
Brown	846B	13	5	33	117.83	134.28	115.863	3.28733	-0.319	3.14233
Shackleton	846D	13	3	125-127	120.05	134.65	115.913	3.27	-0.23	3.27
Brown	846B	13	5	43	117.93	134.38	115.961	3.227	-0.4785	3.082
Shackleton	846D	13	3	135-137	120.15	134.75	116.002	3.15	-0.22	3.15
Brown	846B	13	5	53	118.03	134.48	116.06	3.286	-0.466	3.141
Shackleton	846D	13	3	145-147	120.25	134.85	116.086	2.85	-0.12	2.85
Shackleton	846D	13	4	5-7	120.35	134.95	116.164	2.91	0.02	2.91
Shackleton	846D	13	4	15-17	120.45	135.05	116.241	3.34	-0.36	3.34
Brown	846B	13	5	73	118.23	134.68	116.257	3.361	-0.4025	3.216
Shackleton	846D	13	4	25-27	120.55	135.15	116.316	3.38	-0.32	3.38
Brown	846B	13	5	83	118.33	134.78	116.354	3.406	-0.535	3.261
Shackleton	846D	13	4	35-37	120.65	135.25	116.393	3.2	-0.41	3.2
Brown	846B	13	5	93	118.43	134.88	116.45	3.292	-0.157	3.147
Shackleton	846D	13	4	45-47	120.75	135.35	116.474	3.24	-0.09	3.24
Brown	846B	13	5	103	118.53	134.98	116.546	3.242	-0.145	3.097
Shackleton	846D	13	4	55-57	120.85	135.45	116.558	3.14	-0.03	3.14
Brown	846B	13	5	113	118.63	135.08	116.642	3.194	-0.103	3.049
Shackleton	846D	13	4	65-67	120.95	135.55	116.645	3.18	-0.03	3.18
Shackleton	846D	13	4	75-77	121.05	135.65	116.732	3.04	-0.43	3.04
Brown	846B	13	5	122	118.72	135.17	116.737	3.146	-0.231	3.001
Shackleton	846D	13	4	85-87	121.15	135.75	116.818	3.23	-0.44	3.23
Brown	846B	13	5	133	118.82	135.27	116.832	3.253	-0.364	3.108
Shackleton	846D	13	4	95-97	121.25	135.85	116.904	3.18	-0.34	3.18
Shackleton	846D	13	4	105-107	121.35	135.95	116.99	3.22	-0.42	3.22
Brown	846B	13	6	3	119.03	135.48	117.016	3.44767	-0.38	3.30267
Shackleton	846D	13	4	115-117	121.45	136.05	117.067	3.37	-0.53	3.37
Brown	846B	13	6	13	119.13	135.58	117.102	3.43267	-0.4085	3.28767
Shackleton	846D	13	4	125-127	121.55	136.15	117.144	3.25	-0.45	3.25
Shackleton	846D	13	4	135-137	121.65	136.25	117.221	3.32	-0.55	3.32
Shackleton	846D	13	4	145-147	121.75	136.35	117.299	3.43	-0.44	3.43
Brown	846B	13	6	43	119.43	135.88	117.339	3.56467	-0.484333	3.41967
Shackleton	846D	13	5	5-7	121.85	136.45	117.379	3.35	-0.53	3.35
Shackleton	846D	13	5	15-17	121.95	136.55	117.457	3.34	-0.37	3.34
Brown	846B	13	6	63	119.63	136.08	117.496	3.4315	-0.472	3.2865
Shackleton	846D	13	5	25-27	122.05	136.65	117.534	3.23	-0.57	3.23
Shackleton	846D	13	5	35-37	122.15	136.75	117.613	3.29	-0.41	3.29
Brown	846B	13	6	83	119.83	136.28	117.659	3.2725	-0.4005	3.1275
Shackleton	846D	13	5	45-47	122.25	136.85	117.696	3.16	-0.22	3.16
Shackleton	846D	13	5	55-57	122.35	136.95	117.782	3.15	-0.07	3.15
Brown	846B	13	6	103	120.03	136.48	117.848	3.183	-0.2175	3.038
Shackleton	846D	13	5	65-67	122.45	137.05	117.868	2.78	-0.04	2.78
Brown	846B	13	6	113	120.13	136.58	117.943	3.115	-0.427	2.97
Shackleton	846D	13	5	75-77	122.55	137.15	117.956	3.07		3.07
Brown	846B	13	6	123	120.23	136.68	118.038	3.071	-0.2475	2.926
Shackleton	846D	13	5	85-87	122.65	137.25	118.043	2.99	-0.29	2.99
Brown	846B	13	6	133	120.33	136.78	118.133	3.179	-0.337	3.034
Shackleton	846D	13	5	95-97	122.75	137.35	118.133	2.91	-0.23	2.91
Shackleton	846D	13	5	105-107	122.85	137.45	118.229	2.9	-0.36	2.9
Brown	846B	13	7	3	120.53	136.98	118.323	3.145	-0.376	3
Shackleton	846D	13	5	115-117	122.95	137.55	118.327	2.87	-0.54	2.87
Brown	846B	13	7	13	120.63	137.08	118.418	3.0915	-0.4695	2.9465
Shackleton	846D	13	5	125-127	123.05	137.65	118.423	2.95	-0.36	2.95
Shackleton	846D	13	5	135-137	123.15	137.75	118.517	3.29	-0.28	3.29
Shackleton	846D	13	5	145-147	123.25	137.85	118.613	3.11	-0.24	3.11
Shackleton	846D	13	6	5-7	123.35	137.95	118.71	3.04	-0.26	3.04
Brown	846B	13	7	53	121.03	137.48	118.769	3.0385	-0.454	2.8935
Shackleton	846D	13	6	15-17	123.45	138.05	118.806	3.26		3.26
Brown	846B	13	7	63	121.13	137.58	118.864	2.925	-0.396	2.78
Shackleton	846D	13	6	25-27	123.55	138.15	118.898	2.93	-0.33	2.93
Shackleton	846D	13	6	35-37	123.65	138.25	118.984	2.86	-0.43	2.86
Shackleton	846D	13	6	45-47	123.75	138.35	119.07	3.06	-0.41	3.06
Shackleton	846D	13	6	55-57	123.85	138.45	119.156	2.96	-0.65	2.96
Shackleton	846D	13	6	65-67	123.95	138.55	119.237	3.09	-0.68	3.09
Shackleton	846D	13	6	75-77	124.05	138.65	119.315	3.18	-0.66	3.18
Shackleton	846D	13	6	85-87	124.15	138.75	119.392	2.99	-0.45	2.99
Shackleton	846D	13	6	95-97	124.25	138.85	119.469	2.96	-0.42	2.96
Shackleton	846D	13	6	105-107	124.35	138.95	119.547	2.97	-0.43	2.97
Shackleton	846D	13	6	115-117	124.45	139.05	119.625	3.03	-0.52	3.03
Shackleton	846D	13	6	125-127	124.55	139.15	119.703	2.71	-0.26	2.71
Shackleton	846D	13	6	135-137	124.65	139.25	119.781	2.88	-0.32	2.88
Shackleton	846D	13	6	145-147	124.75	139.35	119.86	2.94	-0.36	2.94
Shackleton	846D	13	7	5-7	124.85	139.45	119.938	2.87	-0.14	2.87
Shackleton	846D	13	7	15-17	124.95	139.55	120.016	2.88	-0.17	2.88
Shackleton	846D	13	7	25-27	125.05	139.65	120.093	2.98	-0.23	2.98
Shackleton	846D	13	7	35-37	125.15	139.75	120.171	3.06	-0.34	3.06
Shackleton	846D	13	7	45-47	125.25	139.85	120.249	3	-0.48	3
Shackleton	846D	13	7	55-57	125.35	139.95	120.326	2.92	-0.43	2.92
Shackleton	846D	13	7	65-67	125.45	140.05	120.404	2.93	-0.21	2.93
Brown	846B	14	2	13	122.63	139.78	120.473	3.29825	-0.4565	3.15325
Shackleton	846D	13	7	75-77	125.55	140.15	120.488	2.94	-0.29	2.94
Brown	846B	14	2	18	122.68	139.83	120.52	3.26233	-0.328	3.11733
Brown	846B	14	2	23	122.73	139.88	120.568	3.312	-0.3235	3.167
Shackleton	846C	13	5	95-97	123.45	139.95	120.582	3.01	-0.14	3.01
Brown	846B	14	2	28	122.78	139.93	120.662	3.226	-0.224	3.081
Shackleton	846C	13	5	105-107	123.55	140.05	120.677	2.92		2.92
Brown	846B	14	2	33	122.83	139.98	120.71	3.225	-0.237333	3.08
Brown	846B	14	2	43	122.93	140.08	120.757	3.1245	-0.36625	2.9795
Shackleton	846C	13	5	115-117	123.65	140.15	120.772	2.95		2.95
Brown	846B	14	2	53	123.03	140.18	120.851	3.0855	-0.2145	2.9405
Brown	846B	14	2	38	122.88	140.03	120.851	3.105	-0.102333	2.96
Shackleton	846C	13	5	125-127	123.75	140.25	120.867	2.96		2.96
Brown	846B	14	2	64	123.13	140.28	120.945	3.0315	-0.215	2.8865
Shackleton	846C	13	5	135-137	123.85	140.35	120.963	2.76	-0.24	2.76
Brown	846B	14	2	68	123.18	140.33	120.984	3.0035	-0.1065	2.8585
Brown	846B	14	2	73	123.23	140.38	121.023	2.993	-0.108	2.848
Shackleton	846C	13	5	145-147	123.95	140.45	121.058	2.92	-0.31	2.92
Brown	846B	14	2	78	123.28	140.43	121.063	2.986	-0.2195	2.841
Brown	846B	14	2	83	123.33	140.48	121.104	2.951	-0.236	2.806
Brown	846B	14	2	88	123.38	140.53	121.143	3.088	-0.037	2.943
Shackleton	846C	13	6	5-7	124.05	140.55	121.153	2.79		2.79
Brown	846B	14	2	93	123.43	140.58	121.182	3.23	-0.248333	3.085
Brown	846B	14	2	98	123.48	140.63	121.221	3.0995	-0.2115	2.9545
Shackleton	846C	13	6	15-17	124.15	140.65	121.248	2.97	-0.22	2.97
Brown	846B	14	2	103	123.53	140.68	121.261	3.2265	-0.009	3.0815
Brown	846B	14	2	108	123.55	140.7	121.3	3.19167	-0.0315	3.04667
Brown	846B	14	2	113	123.63	140.78	121.339	3.19833	-0.251667	3.05333
Shackleton	846C	13	6	25-27	124.25	140.75	121.343	2.85	-0.17	2.85
Brown	846B	14	2	118	123.68	140.83	121.378	3.21233	-0.296667	3.06733
Brown	846B	14	2	123	123.73	140.88	121.418	3.1934	-0.2336	3.0484
Shackleton	846C	13	6	35-37	124.35	140.85	121.439	2.88	-0.26	2.88
Brown	846B	14	2	128	123.78	140.93	121.457	3.2335	-0.253	3.0885
Brown	846B	14	2	133	123.83	140.98	121.496	3.1384	-0.303547	2.9934
Shackleton	846C	13	6	45-47	124.45	140.95	121.534	2.9	-0.12	2.9
Brown	846B	14	2	138	123.88	141.03	121.535	3.067	-0.349	2.922
Brown	846B	14	2	143	123.93	141.08	121.575	3.155	-0.09	3.01
Shackleton	846C	13	6	55-57	124.55	141.05	121.629	2.99		2.99
Brown	846B	14	3	3	124.03	141.18	121.653	3.1835	-0.21825	3.0385
Shackleton	846C	13	6	65-67	124.65	141.15	121.724	3.08		3.08
Brown	846B	14	3	13	124.13	141.28	121.732	3.119	-0.041	2.974
Brown	846B	14	3	23	124.23	141.38	121.811	3.033	0.011	2.888
Shackleton	846C	13	6	75-77	124.75	141.25	121.819	3.4		3.4
Brown	846B	14	3	33	124.33	141.48	121.897	3.146	0.086	3.001
Shackleton	846C	13	6	85-87	124.85	141.35	121.915	3.19		3.19
Shackleton	846C	13	6	95-97	124.95	141.45	122.01	3.05		3.05
Brown	846B	14	3	53	124.53	141.68	122.07	3.172	-0.231	3.027
Shackleton	846C	13	6	105-107	125.05	141.55	122.105	3.11	-0.23	3.11
Brown	846B	14	3	63	124.63	141.78	122.156	3.1025	-0.245	2.9575
Shackleton	846C	13	6	115-117	125.15	141.65	122.2	2.79		2.79
Brown	846B	14	3	73	124.73	141.88	122.242	3.1395	-0.321	2.9945
Shackleton	846C	13	6	125-127	125.25	141.75	122.295	2.9	-0.08	2.9
Brown	846B	14	3	83	124.83	141.98	122.328	3.196	-0.286	3.051
Shackleton	846C	13	6	135-137	125.35	141.85	122.391	3.04		3.04
Brown	846B	14	3	93	124.93	142.08	122.422	3.17667	-0.367333	3.03167
Shackleton	846C	13	6	145-147	125.45	141.95	122.486	3.13	-0.39	3.13
Brown	846B	14	3	103	125.03	142.18	122.517	3.2846	-0.2026	3.1396
Shackleton	846C	13	7	5-7	125.55	142.05	122.581	3.07	-0.32	3.07
Brown	846B	14	4	113	125.13	142.28	122.611	3.2002	-0.3028	3.0552
Shackleton	846C	13	7	15-17	125.65	142.15	122.676	3.03	-0.2	3.03
Brown	846B	14	3	123	125.23	142.38	122.707	3.2725	-0.26875	3.1275
Shackleton	846C	13	7	25-27	125.75	142.25	122.772	3	-0.07	3
Shackleton	846D	14	1	25-27	125.55	142.35	122.801	3.02	-0.35	3.02
Brown	846B	14	3	133	125.33	142.48	122.803	3.18275	-0.1405	3.03775
Shackleton	846D	14	1	35-37	125.65	142.45	122.887	3.09	-0.19	3.09
Brown	846B	14	3	143	125.43	142.58	122.899	3.19	-0.125667	3.045
Shackleton	846D	14	1	45-47	125.75	142.55	122.974	3.03	-0.09	3.03
Brown	846B	14	4	3	125.53	142.68	122.995	3.2185	-0.145	3.0735
Shackleton	846D	14	1	55-57	125.85	142.65	123.061	3	-0.08	3
Brown	846B	14	4	13	125.63	142.78	123.092	3.1955	0.072	3.0505
Shackleton	846D	14	1	65-67	125.95	142.75	123.148	2.89	0.07	2.89
Brown	846B	14	4	23	125.73	142.88	123.189	3.152	-0.107667	3.007
Shackleton	846D	14	1	75-77	126.05	142.85	123.234	2.8	0	2.8
Brown	846B	14	4	33	125.83	142.98	123.287	3.103	-0.06075	2.958
Shackleton	846D	14	1	85-87	126.15	142.95	123.321	3.02		3.02
Shackleton	846D	14	1	95-97	126.25	143.05	123.412	2.99	0.04	2.99
Brown	846B	14	4	53	126.03	143.18	123.481	3.26033	-0.0223333	3.11533
Shackleton	846D	14	1	105-107	126.35	143.15	123.508	3.19		3.19
Brown	846B	14	4	63	126.13	143.28	123.578	3.319	0.025	3.174
Shackleton	846D	14	1	115-117	126.45	143.25	123.607	3.08	-0.08	3.08
Brown	846B	14	4	73	126.33	143.48	123.675	3.24	-0.256	3.095
Shackleton	846D	14	1	125-127	126.55	143.35	123.706	3.25		3.25
Brown	846B	14	4	83	126.43	143.58	123.772	3.2405	-0.037	3.0955
Shackleton	846D	14	1	135-137	126.65	143.45	123.801	2.92	-0.45	2.92
Brown	846B	14	4	93	126.53	143.68	123.869	3.281	0.059	3.136
Shackleton	846D	14	1	145-147	126.75	143.55	123.891	2.96	0.01	2.96
Shackleton	846D	14	2	5-7	126.85	143.65	123.977	2.92	-0.48	2.92
Shackleton	846D	14	2	15-17	126.95	143.75	124.064	2.99		2.99
Shackleton	846D	14	2	25-27	127.05	143.85	124.151	3.12		3.12
Brown	846B	14	4	123	126.73	143.88	124.16	3.033	-0.129	2.888
Shackleton	846D	14	2	35-37	127.15	143.95	124.237	2.86	-0.08	2.86
Brown	846B	14	4	133	126.83	143.98	124.256	2.9275	-0.1345	2.7825
Shackleton	846D	14	2	45-47	127.25	144.05	124.324	2.67		2.67
Brown	846B	14	4	143	126.93	144.08	124.353	2.948	-0.303	2.803
Shackleton	846D	14	2	55-57	127.35	144.15	124.418	2.85	-0.21	2.85
Brown	846B	14	5	3	127.03	144.18	124.45	3.19125	-0.263	3.04625
Shackleton	846D	14	2	65-67	127.45	144.25	124.514	2.94	-0.32	2.94
Brown	846B	14	5	13	127.13	144.28	124.548	3.2995	-0.25825	3.1545
Shackleton	846D	14	2	75-77	127.55	144.35	124.61	3.19	-0.27	3.19
Brown	846B	14	5	23	127.23	144.38	124.645	3.349	-0.34	3.204
Shackleton	846D	14	2	85-87	127.65	144.45	124.705	3.22	-0.28	3.22
Brown	846B	14	5	33	127.33	144.48	124.743	3.3675	-0.261	3.2225
Shackleton	846D	14	2	95-97	127.75	144.55	124.8	3.21	-0.41	3.21
Brown	846B	14	5	43	127.43	144.58	124.841	3.45775	-0.395	3.31275
Shackleton	846D	14	2	105-107	127.85	144.65	124.897	3.29	-0.49	3.29
Brown	846B	14	5	53	127.53	144.68	124.942	3.3595	-0.2695	3.2145
Shackleton	846D	14	2	115-117	127.95	144.75	124.994	3.13	-0.24	3.13
Brown	846B	14	5	63	127.63	144.78	125.043	3.39175	-0.23475	3.24675
Shackleton	846D	14	2	125-127	128.05	144.85	125.09	2.86	-0.21	2.86
Brown	846B	14	5	73	127.73	144.88	125.144	3.162	-0.214333	3.017
Shackleton	846D	14	2	132-134	128.15	144.92	125.153	2.9	-0.18	2.9
Brown	846B	14	5	83	127.83	144.98	125.244	3.01367	-0.182333	2.86867
Shackleton	846D	14	2	145-147	128.25	145.05	125.263	2.87	-0.2	2.87
Shackleton	846D	14	3	5-7	128.35	145.15	125.341	2.88	-0.23	2.88
Brown	846B	14	5	93	127.93	145.08	125.344	2.929	-0.003	2.784
Shackleton	846D	14	3	15-17	128.45	145.25	125.418	2.77	-0.35	2.77
Brown	846B	14	5	103	128.03	145.18	125.443	2.9945	-0.1015	2.8495
Shackleton	846D	14	3	25-27	128.55	145.35	125.5	2.87	-0.24	2.87
Brown	846B	14	5	113	128.13	145.28	125.542	3.1635	-0.338	3.0185
Shackleton	846D	14	3	35-37	128.65	145.45	125.587	3.01	-0.24	3.01
Brown	846B	14	5	123	128.23	145.38	125.641	3.04	-0.265	2.895
Shackleton	846D	14	3	45-47	128.75	145.55	125.674	3.13	-0.5	3.13
Brown	846B	14	5	133	128.33	145.48	125.739	3.399	-0.501	3.254
Shackleton	846D	14	3	55-57	128.85	145.65	125.761	3.22	-0.71	3.22
Brown	846B	14	5	143	128.43	145.58	125.838	3.5425	-0.693	3.3975
Shackleton	846D	14	3	65-67	128.95	145.75	125.852	3.29	-0.89	3.29
Brown	846B	14	6	3	128.53	145.68	125.936	3.548	-0.5985	3.403
Shackleton	846D	14	3	75-77	129.05	145.85	125.949	3.23	-0.61	3.23
Brown	846B	14	6	13	128.63	145.78	126.035	3.468	-0.6095	3.323
Shackleton	846D	14	3	85-87	129.15	145.95	126.047	3.16	-0.54	3.16
Shackleton	846D	14	3	95-97	129.25	146.05	126.143	3.12	-0.42	3.12
Brown	846B	14	6	33	128.83	145.98	126.232	3.2705	-0.4985	3.1255
Shackleton	846D	14	3	105-107	129.35	146.15	126.239	2.9	-0.35	2.9
Brown	846B	14	6	43	128.93	146.08	126.331	3.152	-0.247	3.007
Shackleton	846D	14	3	115-117	129.45	146.25	126.336	2.92	-0.03	2.92
Shackleton	846D	14	3	125-127	129.55	146.35	126.434	2.61	-0.09	2.61
Shackleton	846D	14	3	135-137	129.65	146.45	126.531	3.03	-0.11	3.03
Shackleton	846D	14	3	145-147	129.75	146.55	126.628	2.99	-0.16	2.99
Shackleton	846D	14	4	5-7	129.85	146.65	126.725	2.82	-0.19	2.82
Shackleton	846D	14	4	15-17	129.95	146.75	126.823	2.99	-0.26	2.99
Shackleton	846D	14	4	25-27	130.05	146.85	126.921	3.07	-0.37	3.07
Shackleton	846D	14	4	35-37	130.15	146.95	127.018	3.14	-0.45	3.14
Shackleton	846D	14	4	45-47	130.25	147.05	127.115	3.17	-0.52	3.17
Shackleton	846D	14	4	55-57	130.35	147.15	127.213	3.03	-0.5	3.03
Shackleton	846D	14	4	65-67	130.45	147.25	127.31	2.79	-0.23	2.79
Shackleton	846D	14	4	75-77	130.55	147.35	127.408	2.97	-0.1	2.97
Shackleton	846D	14	4	85-87	130.65	147.45	127.506	3.09	-0.48	3.09
Shackleton	846D	14	4	95-97	130.75	147.55	127.603	2.72	-0.03	2.72
Shackleton	846D	14	4	105-107	130.85	147.65	127.7	2.86	-0.08	2.86
Shackleton	846D	14	4	115-117	130.95	147.75	127.797	2.85	0.04	2.85
Shackleton	846D	14	4	125-127	131.05	147.85	127.894	2.94	-0.04	2.94
Shackleton	846D	14	4	135-137	131.15	147.95	127.992	2.85	-0.23	2.85
Shackleton	846D	14	4	145-147	131.25	148.05	128.09	2.93	-0.23	2.93
Shackleton	846D	14	5	5-7	131.35	148.15	128.189	3.08	-0.2	3.08
Shackleton	846D	14	5	15-17	131.45	148.25	128.288	2.89	-0.23	2.89
Shackleton	846D	14	5	25-27	131.55	148.35	128.389	2.88	-0.25	2.88
Shackleton	846D	14	5	35-37	131.65	148.45	128.49	2.79	-0.17	2.79
Shackleton	846D	14	5	45-47	131.75	148.55	128.591	2.69	-0.22	2.69
Shackleton	846D	14	5	55-57	131.85	148.65	128.692	2.76	-0.14	2.76
Shackleton	846D	14	5	75-77	132.05	148.85	128.894	2.66	-0.08	2.66
Shackleton	846D	14	5	85-87	132.15	148.95	128.996	2.85	-0.09	2.85
Shackleton	846D	14	5	95-97	132.25	149.05	129.097	3.06	-0.37	3.06
Shackleton	846D	14	5	105-107	132.35	149.15	129.197	3.16	-0.29	3.16
Shackleton	846D	14	5	115-117	132.45	149.25	129.298	3.2	-0.14	3.2
Shackleton	846D	14	5	125-127	132.55	149.35	129.399	2.89	-0.25	2.89
Shackleton	846D	14	5	135-137	132.65	149.45	129.501	2.88	-0.16	2.88
Shackleton	846D	14	5	145-147	132.75	149.55	129.602	3.02	-0.29	3.02
Shackleton	846D	14	6	5-7	132.85	149.65	129.703	2.99	-0.34	2.99
Shackleton	846D	14	6	15-17	132.95	149.75	129.804	3.06	-0.31	3.06
Shackleton	846D	14	6	25-27	133.05	149.85	129.905	3.02	-0.45	3.02
Shackleton	846D	14	6	35-37	133.15	149.95	130.006	3.11		3.11
Shackleton	846D	14	6	45-47	133.25	150.05	130.107	2.97	-0.46	2.97
Shackleton	846D	14	6	55-57	133.35	150.15	130.208	2.89	-0.36	2.89
Shackleton	846D	14	6	65-67	133.45	150.25	130.31	2.93	-0.35	2.93
Shackleton	846D	14	6	75-77	133.55	150.35	130.41	3.18	-0.56	3.18
Shackleton	846D	14	6	85-87	133.65	150.45	130.518	3.28	-0.4	3.28
Shackleton	846C	14	5	35-37	132.35	150.75	130.735	3.04	-0.31	3.04
Shackleton	846C	14	5	45-47	132.45	150.85	130.828	2.81		2.81
Shackleton	846C	14	5	55-57	132.55	150.95	130.918	2.68		2.68
Shackleton	846C	14	5	65-67	132.65	151.05	131.007	2.63	-0.19	2.63
Shackleton	846C	14	5	75-77	132.75	151.15	131.097	2.62	-0.05	2.62
Shackleton	846C	14	5	85-87	132.85	151.25	131.186	3.03	-0.1	3.03
Shackleton	846C	14	5	95-97	132.95	151.35	131.275	2.7	-0.07	2.7
Shackleton	846C	14	5	105-107	133.05	151.45	131.365	2.75	-0.28	2.75
Shackleton	846C	14	5	115-117	133.15	151.55	131.454	2.99	-0.37	2.99
Shackleton	846C	14	5	125-127	133.25	151.65	131.543	3.02	-0.45	3.02
Shackleton	846C	14	5	135-137	133.35	151.75	131.633	3.13	-0.51	3.13
Shackleton	846C	14	5	145-147	133.45	151.85	131.722	3.14	-0.31	3.14
Shackleton	846C	14	6	5-7	133.55	151.95	131.811	2.83	-0.27	2.83
Shackleton	846C	14	6	15-17	133.65	152.05	131.901	2.86	-0.27	2.86
Shackleton	846C	14	6	25-27	133.75	152.15	131.99	3.02	-0.27	3.02
Shackleton	846C	14	6	35-37	133.85	152.25	132.079	2.97		2.97
Shackleton	846C	14	6	45-47	133.95	152.35	132.169	2.97	-0.03	2.97
Shackleton	846C	14	6	55-57	134.05	152.45	132.258	3.05	0.01	3.05
Shackleton	846C	14	6	65-67	134.15	152.55	132.343	2.95	0.01	2.95
Shackleton	846D	15	1	5-7	134.85	152.85	132.372	2.97	-0.07	2.97
Shackleton	846C	14	6	75-77	134.25	152.65	132.411	2.91	-0.1	2.91
Shackleton	846D	15	1	15-17	134.95	152.95	132.452	2.86		2.86
Shackleton	846C	14	6	85-87	134.35	152.75	132.478	2.86	-0.34	2.86
Shackleton	846D	15	1	25-27	135.05	153.05	132.531	2.85	-0.5	2.85
Shackleton	846C	14	6	95-97	134.45	152.85	132.546	2.85	-0.33	2.85
Shackleton	846D	15	1	35-37	135.15	153.15	132.608	2.91	-0.34	2.91
Shackleton	846C	14	6	105-107	134.55	152.95	132.613	3.15	-0.4	3.15
Shackleton	846D	15	1	45-47	135.25	153.25	132.684	2.97	-0.43	2.97
Shackleton	846D	15	1	55-57	135.35	153.35	132.762	3.06	-0.46	3.06
Shackleton	846D	15	1	65-67	135.45	153.45	132.843	3	-0.22	3
Shackleton	846D	15	1	75-77	135.55	153.55	132.929	2.89	-0.3	2.89
Shackleton	846D	15	1	85-87	135.65	153.65	133.016	2.86	-0.44	2.86
Shackleton	846D	15	1	95-97	135.75	153.75	133.103	2.85		2.85
Shackleton	846D	15	1	105-107	135.85	153.85	133.19	2.75	-0.17	2.75
Shackleton	846D	15	1	115-117	135.95	153.95	133.276	3.11	-0.41	3.11
Shackleton	846D	15	1	125-127	136.05	154.05	133.362	3.03	-0.31	3.03
Shackleton	846D	15	1	135-137	136.15	154.15	133.45	3.1	-0.04	3.1
Shackleton	846D	15	1	145-147	136.25	154.25	133.542	3.03	-0.26	3.03
Shackleton	846D	15	2	5-7	136.35	154.35	133.638	2.78	-0.31	2.78
Shackleton	846D	15	2	15-17	136.45	154.45	133.737	2.88		2.88
Shackleton	846D	15	2	25-27	136.55	154.55	133.835	3.05	-0.16	3.05
Shackleton	846D	15	2	35-37	136.65	154.65	133.93	3.09		3.09
Shackleton	846D	15	2	45-47	136.75	154.75	134.019	3.02	-0.07	3.02
Shackleton	846D	15	2	55-57	136.85	154.85	134.106	3.04	-0.19	3.04
Shackleton	846D	15	2	65-67	136.95	154.95	134.193	3.11		3.11
Shackleton	846D	15	2	75-77	137.05	155.05	134.279	3.02		3.02
Shackleton	846D	15	2	85-87	137.15	155.15	134.359	3.24		3.24
Shackleton	846D	15	2	95-97	137.25	155.25	134.434	3.07	-0.27	3.07
Shackleton	846D	15	2	105-107	137.35	155.35	134.507	3.38		3.38
Shackleton	846D	15	2	115-117	137.45	155.45	134.582	3.31		3.31
Shackleton	846D	15	2	125-127	137.55	155.55	134.662	3.16		3.16
Shackleton	846D	15	2	135-137	137.65	155.65	134.748	3.32		3.32
Shackleton	846D	15	2	145-147	137.75	155.75	134.835	3.19	-0.09	3.19
Shackleton	846D	15	3	5-7	137.85	155.85	134.918	3.46		3.46
Shackleton	846D	15	3	15-17	137.95	155.95	134.997	3.66		3.66
Shackleton	846D	15	3	25-27	138.05	156.05	135.073	3.55		3.55
Shackleton	846D	15	3	35-37	138.15	156.15	135.151	3.38		3.38
Shackleton	846D	15	3	45-47	138.25	156.25	135.23	3.44		3.44
Shackleton	846D	15	3	55-57	138.35	156.35	135.309	2.95	-0.48	2.95
Shackleton	846D	15	3	65-67	138.45	156.45	135.387	3.22		3.22
Shackleton	846D	15	3	75-77	138.55	156.55	135.464	3.38		3.38
Shackleton	846D	15	3	85-87	138.65	156.65	135.543	3.17		3.17
Shackleton	846D	15	3	95-97	138.75	156.75	135.626	2.96	0.13	2.96
Shackleton	846D	15	3	105-107	138.85	156.85	135.712	2.92	-0.12	2.92
Shackleton	846D	15	3	115-117	138.95	156.95	135.799	3.02	-0.21	3.02
Shackleton	846D	15	3	125-127	139.05	157.05	135.886	3.1		3.1
Shackleton	846D	15	3	135-137	139.15	157.15	135.973	3.28		3.28
Shackleton	846D	15	3	145-147	139.25	157.25	136.061	2.94	-0.31	2.94
Shackleton	846D	15	4	5-7	139.35	157.35	136.157	3.05		3.05
Shackleton	846D	15	4	15-17	139.45	157.45	136.254	3.27		3.27
Shackleton	846D	15	4	25-27	139.55	157.55	136.345	3.41		3.41
Shackleton	846D	15	4	35-37	139.65	157.65	136.431	3.34		3.34
Shackleton	846D	15	4	45-47	139.75	157.75	136.514	3.35		3.35
Shackleton	846D	15	4	55-57	139.85	157.85	136.591	3.29	-0.08	3.29
Shackleton	846D	15	4	65-67	139.95	157.95	136.665	3.35		3.35
Shackleton	846D	15	4	75-77	140.05	158.05	136.741	3.13		3.13
Shackleton	846D	15	4	85-87	140.15	158.15	136.819	3	-0.15	3
Shackleton	846D	15	4	95-97	140.25	158.25	136.901	2.98	-0.22	2.98
Shackleton	846D	15	4	105-107	140.35	158.35	136.987	3.04		3.04
Shackleton	846D	15	4	115-117	140.45	158.45	137.074	2.93		2.93
Shackleton	846D	15	4	125-127	140.55	158.55	137.16	3.06		3.06
Shackleton	846D	15	4	135-137	140.65	158.65	137.246	3.05	-0.22	3.05
Shackleton	846D	15	4	145-147	140.75	158.75	137.327	2.92		2.92
Shackleton	846D	15	5	5-7	140.85	158.85	137.402	3		3
Shackleton	846D	15	5	15-17	140.95	158.95	137.481	3.01		3.01
Shackleton	846D	15	5	25-27	141.05	159.05	137.568	3.13		3.13
Shackleton	846D	15	5	35-37	141.15	159.15	137.655	3.2		3.2
Shackleton	846D	15	5	45-47	141.25	159.25	137.742	3.1		3.1
Shackleton	846D	15	5	55-57	141.35	159.35	137.828	2.96		2.96
Shackleton	846D	15	5	65-67	141.45	159.45	137.914	2.71		2.71
Shackleton	846D	15	5	75-77	141.55	159.55	138.002	2.89		2.89
Shackleton	846D	15	5	85-87	141.65	159.65	138.088	2.92		2.92
Shackleton	846D	15	5	95-97	141.75	159.75	138.174	2.93		2.93
Shackleton	846D	15	5	105-107	141.85	159.85	138.262	3.03		3.03
Shackleton	846D	15	5	115-117	141.95	159.95	138.354	3.02	0.01	3.02
Shackleton	846D	15	5	125-127	142.05	160.05	138.452	3.08		3.08
Shackleton	846D	15	5	135-137	142.15	160.15	138.549	2.75	-0.08	2.75
Shackleton	846D	15	5	145-147	142.25	160.25	138.644	2.79		2.79
Shackleton	846D	15	6	5-7	142.35	160.35	138.739	3.05	0.07	3.05
Shackleton	846D	15	6	15-17	142.45	160.45	138.835	2.76		2.76
Shackleton	846D	15	6	25-27	142.55	160.55	138.933	2.94		2.94
Shackleton	846D	15	6	35-37	142.65	160.65	139.027	2.92		2.92
Shackleton	846D	15	6	45-47	142.75	160.75	139.116	3.11		3.11
Shackleton	846D	15	6	55-57	142.85	160.85	139.204	3.03		3.03
Shackleton	846D	15	6	65-67	142.95	160.95	139.29	3.18		3.18
Shackleton	846D	15	6	75-77	143.05	161.05	139.376	3.06		3.06
Shackleton	846D	15	6	85-87	143.15	161.15	139.463	2.45		2.45
Shackleton	846D	15	6	95-97	143.25	161.25	139.55	2.76		2.76
Shackleton	846D	15	6	105-107	143.35	161.35	139.636	2.78		2.78
Shackleton	846D	15	6	115-117	143.45	161.45	139.716	2.85		2.85
Shackleton	846D	15	6	125-127	143.55	161.55	139.793	2.92		2.92
Shackleton	846D	15	6	135-137	143.65	161.65	139.872	2.78		2.78
Shackleton	846D	15	6	145-147	143.75	161.75	139.958	2.99	-0.39	2.99
Shackleton	846D	15	7	5-7	143.85	161.85	140.045	2.82	-0.34	2.82
Shackleton	846D	15	7	15-17	143.95	161.95	140.131	2.9		2.9
Shackleton	846D	15	7	25-27	144.05	162.05	140.216	2.86	-0.17	2.86
Shackleton	138-846B	16	2	76-78	142.26	162.46	140.291	3.07		3.07
Shackleton	846D	15	7	35-37	144.15	162.15	140.297	2.95	-0.84	2.95
Shackleton	846D	15	7	45-47	144.25	162.25	140.375	2.89	-0.36	2.89
Shackleton	138-846B	16	2	85-87	142.35	162.55	140.382	2.89	-0.67	2.89
Shackleton	846D	15	7	55-57	144.35	162.35	140.451	2.89		2.89
Shackleton	138-846B	16	2	94-96	142.44	162.64	140.472	3.25	-0.17	3.25
Shackleton	846D	15	7	65-67	144.45	162.45	140.528	2.98	-0.3	2.98
Shackleton	138-846B	16	2	104-106	142.54	162.74	140.572	2.75	-0.09	2.75
Shackleton	846D	15	7	75-77	144.55	162.55	140.607	2.26	-0.23	2.26
Shackleton	138-846B	16	2	114-116	142.64	162.84	140.672	2.85		2.85
Shackleton	846D	15	7	85-87	144.65	162.65	140.684	2.79		2.79
Shackleton	138-846B	16	2	125-127	142.75	162.95	140.768	2.83		2.83
Shackleton	138-846B	16	2	134-136	142.84	163.04	140.847	2.89		2.89
Shackleton	138-846B	16	2	144-146	142.94	163.14	140.935	3		3
Shackleton	138-846B	16	3	4-6	143.04	163.24	141.022	3.16	-0.41	3.16
Shackleton	138-846B	16	3	15-17	143.15	163.35	141.118	3.14		3.14
Shackleton	138-846B	16	3	25-27	143.25	163.45	141.149	3.03		3.03
Shackleton	138-846B	16	3	36-38	143.36	163.56	141.302	2.86	-1.02	2.86
Shackleton	138-846B	16	3	45-47	143.45	163.65	141.381	2.9	-0.33	2.9
Shackleton	138-846B	16	3	55-57	143.55	163.75	141.469	3.08	-0.44	3.08
Shackleton	138-846B	16	3	65-67	143.65	163.85	141.556	3.14		3.14
Shackleton	138-846B	16	3	75-77	143.75	163.95	141.644	3.31		3.31
Shackleton	138-846B	16	3	85-87	143.85	164.05	141.728	3.34		3.34
Shackleton	138-846B	16	3	95-97	143.95	164.15	141.778	3.05	-0.28	3.05
Shackleton	138-846B	16	3	105-107	144.05	164.25	141.828	3.16		3.16
Shackleton	138-846B	16	3	115-117	144.15	164.35	141.879	3.16		3.16
Shackleton	138-846B	16	3	125-127	144.25	164.45	141.929	3.07		3.07
Shackleton	138-846B	16	3	134-136	144.34	164.54	141.974	3.15		3.15
Shackleton	138-846B	16	3	144-146	144.44	164.64	142.025	2.85		2.85
Shackleton	846B	16	4	7-9	144.57	164.77	142.09	2.81	-0.19	2.81
Shackleton	846D	16	1	65-67	144.95	164.95	142.237	2.82		2.82
Shackleton	846D	16	1	75-77	145.05	165.05	142.325	2.69		2.69
Shackleton	846D	16	1	85-87	145.15	165.15	142.421	3.01	-0.17	3.01
Shackleton	846D	16	1	95-97	145.25	165.25	142.518	3.25		3.25
Shackleton	846D	16	1	105-107	145.35	165.35	142.608	3.03	-0.24	3.03
Shackleton	846D	16	1	115-117	145.45	165.45	142.694	3.01		3.01
Shackleton	846D	16	1	125-127	145.55	165.55	142.781	2.93		2.93
Shackleton	846D	16	1	135-137	145.65	165.65	142.868	2.86		2.86
Shackleton	846D	16	1	145-147	145.75	165.75	142.955	3.15		3.15
Shackleton	846D	16	2	5-7	145.85	165.85	143.041	3.1		3.1
Shackleton	846D	16	2	15-17	145.95	165.95	143.127	2.86		2.86
Shackleton	846D	16	2	25-27	146.05	166.05	143.215	2.7	-0.38	2.7
Shackleton	846D	16	2	35-37	146.15	166.15	143.302	2.74	-0.22	2.74
Shackleton	846D	16	2	45-47	146.25	166.25	143.392	2.59	-0.26	2.59
Shackleton	846D	16	2	55-57	146.35	166.35	143.489	2.8	-0.76	2.8
Shackleton	846D	16	2	65-67	146.45	166.45	143.584	3.23		3.23
Shackleton	846D	16	2	75-77	146.55	166.55	143.673	2.78	-0.91	2.78
Shackleton	846D	16	2	85-87	146.65	166.65	143.76	2.57	-0.42	2.57
Shackleton	846D	16	2	95-97	146.75	166.75	143.846	2.75	-0.08	2.75
Shackleton	846D	16	2	105-107	146.85	166.85	143.931	2.84	-0.62	2.84
Shackleton	846D	16	2	115-117	146.95	166.95	144.013	2.88	-0.24	2.88
Shackleton	846D	16	2	125-127	147.05	167.05	144.09	2.58		2.58
Shackleton	846D	16	2	135-137	147.15	167.15	144.167	3.05		3.05
Shackleton	846D	16	2	145-147	147.25	167.25	144.245	2.85		2.85
Shackleton	846D	16	3	5-7	147.35	167.35	144.324	3.2	-0.18	3.2
Shackleton	846D	16	3	15-17	147.45	167.45	144.404	3.03	-0.09	3.03
Shackleton	846D	16	3	25-27	147.55	167.55	144.483	2.93	-0.13	2.93
Shackleton	846D	16	3	35-37	147.65	167.65	144.561	3.05	-0.44	3.05
Shackleton	846D	16	3	45-47	147.75	167.75	144.64	3.06	0.01	3.06
Shackleton	846D	16	3	55-57	147.85	167.85	144.72	3.04	-0.12	3.04
Shackleton	846D	16	3	65-67	147.95	167.95	144.799	2.91		2.91
Shackleton	846D	16	3	75-77	148.05	168.05	144.878	2.84		2.84
Shackleton	846D	16	3	85-87	148.15	168.15	144.954	2.92		2.92
Shackleton	846D	16	3	95-97	148.25	168.25	145.029	3.18		3.18
Shackleton	846D	16	3	105-107	148.35	168.35	145.107	3.07	0.08	3.07
Shackleton	846D	16	3	115-117	148.45	168.45	145.192	3.09	-0.22	3.09
Shackleton	846D	16	3	125-127	148.55	168.55	145.28	3.18	-0.55	3.18
Shackleton	846D	16	3	135-137	148.65	168.65	145.367	3.01		3.01
Shackleton	846D	16	3	145-147	148.75	168.75	145.457	3.21	0.11	3.21
Shackleton	846D	16	4	5-7	148.85	168.85	145.553	2.98	-0.59	2.98
Shackleton	846D	16	4	15-17	148.95	168.95	145.651	3.08	-0.95	3.08
Shackleton	846D	16	4	25-27	149.05	169.05	145.747	2.97	0	2.97
Shackleton	846D	16	4	35-37	149.15	169.15	145.842	2.93	-0.88	2.93
Shackleton	846D	16	4	45-47	149.25	169.25	145.937	3.08		3.08
Shackleton	846D	16	4	55-57	149.35	169.35	146.032	2.98		2.98
Shackleton	846D	16	4	65-67	149.45	169.45	146.128	2.75	0.1	2.75
Shackleton	846D	16	4	75-77	149.55	169.55	146.223	2.96	-0.09	2.96
Shackleton	846D	16	4	85-87	149.65	169.65	146.318	3.04		3.04
Shackleton	846D	16	4	95-97	149.75	169.75	146.413	2.7	-0.86	2.7
Shackleton	846D	16	4	105-107	149.85	169.85	146.509	2.93	-0.21	2.93
Shackleton	846D	16	4	115-117	149.95	169.95	146.607	3.19	-0.36	3.19
Shackleton	846D	16	4	125-127	150.05	170.05	146.702	2.9	-0.28	2.9
Shackleton	846D	16	4	135-137	150.15	170.15	146.791	3	-0.13	3
Shackleton	846D	16	4	145-147	150.25	170.25	146.878	2.64	-0.26	2.64
Shackleton	846D	16	5	5-7	150.35	170.35	146.965	2.93	-0.22	2.93
Shackleton	846D	16	5	15-17	150.45	170.45	147.051	2.88	-0.25	2.88
Shackleton	846D	16	5	25-27	150.55	170.55	147.138	2.65	-0.35	2.65
Shackleton	846D	16	5	35-37	150.65	170.65	147.225	2.85	-0.61	2.85
Shackleton	846D	16	5	45-47	150.75	170.75	147.312	3.12		3.12
Shackleton	846D	16	5	55-57	150.85	170.85	147.397	3	-0.15	3
Shackleton	846D	16	5	65-67	150.95	170.95	147.48	2.52	-1.01	2.52
Shackleton	846D	16	5	75-77	151.05	171.05	147.557	2.68	-0.2	2.68
Shackleton	846D	16	5	85-87	151.15	171.15	147.634	2.88	-0.17	2.88
Shackleton	846D	16	5	95-97	151.25	171.25	147.712	2.8	-0.05	2.8
Shackleton	846D	16	5	105-107	151.35	171.35	147.791	2.88	-0.87	2.88
Shackleton	846D	16	5	115-117	151.45	171.45	147.87	2.67	-0.26	2.67
Shackleton	846D	16	5	125-127	151.55	171.55	147.947	2.69	-0.25	2.69
Shackleton	846D	16	5	135-137	151.65	171.65	148.024	2.82	-0.1	2.82
Shackleton	846D	16	5	145-147	151.75	171.75	148.104	2.84	-0.59	2.84
Shackleton	846D	16	6	5-7	151.85	171.85	148.188	2.52	-0.25	2.52
Shackleton	846D	16	6	15-17	151.95	171.95	148.276	2.9	-0.01	2.9
Shackleton	846D	16	6	25-27	152.05	172.05	148.362	2.84		2.84
Shackleton	846D	16	6	35-37	152.15	172.15	148.448	2.91		2.91
Shackleton	846D	16	6	45-47	152.25	172.25	148.535	2.88	-0.73	2.88
Shackleton	846D	16	6	55-57	152.35	172.35	148.622	3.11	-0.33	3.11
Shackleton	846D	16	6	65-67	152.45	172.45	148.709	2.93	-0.52	2.93
Shackleton	846D	16	6	75-77	152.55	172.55	148.795	2.79	-0.15	2.79
Shackleton	846D	16	6	85-87	152.65	172.65	148.881	2.94	-0.48	2.94
Shackleton	846D	16	6	95-97	152.75	172.75	148.968	2.95	-0.4	2.95
Shackleton	846D	16	6	105-107	152.85	172.85	149.055	2.72	-0.81	2.72
Shackleton	846D	16	6	115-117	152.95	172.95	149.141	3.16		3.16
Shackleton	846D	16	6	125-127	153.05	173.05	149.221	3.26		3.26
Shackleton	846D	16	6	135-137	153.15	173.15	149.298	3.12		3.12
Shackleton	846D	16	6	145-147	153.25	173.25	149.374	3.31	-0.23	3.31
Shackleton	846D	16	7	5-7	153.35	173.35	149.45	3.15		3.15
Shackleton	846D	16	7	15-17	153.45	173.45	149.529	3.22	-0.08	3.22
Shackleton	846D	16	7	25-27	153.55	173.55	149.611	2.91	-0.72	2.91
Shackleton	846D	16	7	35-37	153.65	173.65	149.698	2.87	-0.57	2.87
Shackleton	846D	16	7	45-47	153.75	173.75	149.785	2.99	-0.37	2.99
Shackleton	846C	16	6	55-57	153.05	173.75	149.828	2.79	-0.48	2.79
Shackleton	846D	16	7	55-57	153.85	173.85	149.871	2.78	-0.53	2.78
Shackleton	846C	16	6	65-67	153.15	173.85	149.907	2.87	-0.49	2.87
Shackleton	846D	16	7	65-67	153.95	173.95	149.958	2.96	-0.43	2.96
Shackleton	846C	16	6	75-77	153.25	173.95	149.985	2.93	-0.36	2.93
Shackleton	846C	16	6	85-87	153.35	174.05	150.064	2.93	-0.29	2.93
Shackleton	846C	16	6	95-97	153.45	174.15	150.142	2.93	-0.33	2.93
Shackleton	846C	16	6	105-107	153.55	174.25	150.221	2.94	-0.33	2.94
Shackleton	846C	16	6	115-117	153.65	174.35	150.299	3.11	-0.33	3.11
Shackleton	846C	16	6	125-127	153.75	174.45	150.377	2.88	-0.61	2.88
Shackleton	846C	16	6	135-137	153.85	174.55	150.456	2.98	-0.39	2.98
Shackleton	846C	16	6	145-147	153.95	174.65	150.534	2.96	-0.51	2.96
Shackleton	846C	16	7	5-7	154.05	174.75	150.613	3.05	-0.51	3.05
Shackleton	846C	16	7	15-17	154.15	174.85	150.691	2.96	-0.3	2.96
Shackleton	846C	16	7	25-27	154.25	174.95	150.809	3.29	-0.17	3.29
Shackleton	846D	17	1	75-77	154.55	175.35	150.851	3.43		3.43
Shackleton	846D	17	1	85-87	154.65	175.45	150.929	3.07	-0.43	3.07
Shackleton	846D	17	1	95-97	154.75	175.55	151.007	3.26		3.26
Shackleton	846D	17	1	105-107	154.85	175.65	151.085	3.15	-0.42	3.15
Shackleton	846D	17	1	115-117	154.95	175.75	151.162	3.09	-0.39	3.09
Shackleton	846C	16	7	35-37	154.35	175.05	151.165	3.2	-0.13	3.2
Shackleton	846D	17	1	125-127	155.05	175.85	151.24	2.97	-0.54	2.97
Shackleton	846C	16	7	45-47	154.45	175.15	151.245	3.31	-0.52	3.31
Shackleton	846D	17	1	135-137	155.15	175.95	151.322	3.07	-0.35	3.07
Shackleton	846D	17	1	145-147	155.25	176.05	151.409	3.16		3.16
Shackleton	846D	17	2	5-7	155.35	176.15	151.496	3.09	-0.56	3.09
Shackleton	846D	17	2	15-17	155.45	176.25	151.589	3.06	-0.62	3.06
Shackleton	846D	17	2	25-27	155.55	176.35	151.686	2.98	-0.82	2.98
Shackleton	846D	17	2	35-37	155.65	176.45	151.784	3.05	-0.89	3.05
Shackleton	846D	17	2	45-47	155.75	176.55	151.88	2.99	-0.71	2.99
Shackleton	846D	17	2	55-57	155.85	176.65	151.976	2.87	-0.64	2.87
Shackleton	846D	17	2	65-67	155.95	176.75	152.073	3.08	-0.61	3.08
Shackleton	846D	17	2	75-77	156.05	176.85	152.171	3		3
Shackleton	846D	17	2	85-87	156.15	176.95	152.27	3.07	-0.61	3.07
Shackleton	846D	17	2	95-97	156.25	177.05	152.371	3.06	-1.13	3.06
Shackleton	846D	17	2	105-107	156.35	177.15	152.474	3.24	-0.57	3.24
Shackleton	846D	17	2	115-117	156.45	177.25	152.578	3.27	-0.8	3.27
Shackleton	846D	17	2	125-127	156.55	177.35	152.682	3.05	-0.89	3.05
Shackleton	846D	17	2	135-137	156.65	177.45	152.784	3.5		3.5
Shackleton	846D	17	2	145-147	156.75	177.55	152.885	3.05	-0.57	3.05
Shackleton	846D	17	3	5-7	156.85	177.65	152.984	3.19	-0.53	3.19
Shackleton	846D	17	3	15-17	156.95	177.75	153.083	2.99	-0.42	2.99
Shackleton	846D	17	3	25-27	157.05	177.85	153.181	2.79	-0.62	2.79
Shackleton	846D	17	3	35-37	157.15	177.95	153.278	3.09	-0.38	3.09
Shackleton	846D	17	3	45-47	157.25	178.05	153.374	3.19		3.19
Shackleton	846D	17	3	55-57	157.35	178.15	153.47	3.03		3.03
Shackleton	846D	17	3	65-67	157.45	178.25	153.567	3.37		3.37
Shackleton	846D	17	3	75-77	157.55	178.35	153.665	3.04	-0.2	3.04
Shackleton	846D	17	3	85-87	157.65	178.45	153.761	3.23	-0.38	3.23
Shackleton	846D	17	3	95-97	157.75	178.55	153.852	3.11	-0.45	3.11
Shackleton	846D	17	3	105-107	157.85	178.65	153.936	2.88	-0.64	2.88
Shackleton	846D	17	3	115-117	157.95	178.75	154.016	3.03	-0.51	3.03
Shackleton	846D	17	3	125-127	158.05	178.85	154.093	2.79	-0.57	2.79
Shackleton	846D	17	3	135-137	158.15	178.95	154.169	2.87	-0.77	2.87
Shackleton	846D	17	3	145-147	158.25	179.05	154.247	2.9	-0.68	2.9
Shackleton	846D	17	4	5-7	158.35	179.15	154.325	2.94	-0.73	2.94
Shackleton	846D	17	4	15-17	158.45	179.25	154.403	3.23	-0.89	3.23
Shackleton	846D	17	4	25-27	158.55	179.35	154.481	3.23	-0.57	3.23
Shackleton	846D	17	4	35-37	158.65	179.45	154.559	3.13	-0.51	3.13
Shackleton	846D	17	4	45-47	158.75	179.55	154.637	3.06	-0.52	3.06
Shackleton	846D	17	4	55-57	158.85	179.65	154.715	2.99	-0.43	2.99
Shackleton	846D	17	4	65-67	158.95	179.75	154.793	2.93	-0.41	2.93
Shackleton	846D	17	4	75-77	159.05	179.85	154.871	2.99	-0.32	2.99
Shackleton	846D	17	4	85-87	159.15	179.95	154.949	2.89	-0.63	2.89
Shackleton	846D	17	4	95-97	159.25	180.05	155.027	2.84	-0.39	2.84
Shackleton	846D	17	4	105-107	159.35	180.15	155.104	2.91	-0.07	2.91
Shackleton	846D	17	4	115-117	159.45	180.25	155.182	2.84	-0.75	2.84
Shackleton	846D	17	4	125-127	159.55	180.35	155.26	2.86	-0.23	2.86
Shackleton	846D	17	4	135-137	159.65	180.45	155.339	3.3		3.3
Shackleton	846D	17	4	145-147	159.75	180.55	155.417	3.22	-0.52	3.22
