# Supplementary material for: A Revised Mid-Pliocene Composite Section for ODP Site 846
Source: Copernicus journal article supplement (doi:10.5194/cp-2019-133), 2020-02-21
Supplement: Supplementary file 10 [file Table S9 846 SST composite.xls]

## Sheet: 846 SST composite logdepth
TABLE S9: 846 SST COMPOSITE
study	hole	Core	Section	depth interval (cm)	Depth (mbsf)	depth shipboard composite	log depth this study	Uk'37	adjusted Uk'37 to Lawrence et al.	SST (Muller)	SST (Prahl et al.)
Lawrence et al. 2006	846D	9	4	123-124	83.53	93.93	80.0645	0.8312	0.8312	23.8545	23.3
Lawrence et al. 2006	846D	9	4	133-134	83.63	94.03	80.1574	0.84425	0.84425	24.25	23.6838
Lawrence et al. 2006	846D	9	4	143-144	83.73	94.13	80.2512	0.853284	0.853284	24.5238	23.9495
Lawrence et al. 2006	846D	9	5	3-4	83.83	94.23	80.3451	0.847079	0.847079	24.3357	23.767
Lawrence et al. 2006	846D	9	5	13-14	83.93	94.33	80.4355	0.862553	0.862553	24.8046	24.2221
Lawrence et al. 2006	846D	9	5	23-24	84.03	94.43	80.5155	0.846635	0.846635	24.3223	23.754
Lawrence et al. 2006	846D	9	5	33-34	84.13	94.53	80.5954	0.890354	0.890354	25.6471	25.0398
Lawrence et al. 2006	846D	9	5	43-44	84.23	94.63	80.6754	0.888701	0.888701	25.597	24.9912
Lawrence et al. 2006	846D	9	5	53-54	84.33	94.73	80.7554	0.8944	0.8944	25.7697	25.1588
Lawrence et al. 2006	846D	9	5	63-64	84.43	94.83	80.8353	0.899488	0.899488	25.9239	25.3085
Lawrence et al. 2006	846D	9	5	73-74	84.53	94.93	80.9153	0.896578	0.896578	25.8357	25.2229
Lawrence et al. 2006	846D	9	5	73-74	84.53	94.93	80.9153	0.895258	0.895258	25.7957	25.1841
Lawrence et al. 2006	846D	9	5	83-84	84.63	95.03	80.9953	0.881121	0.881121	25.3673	24.7683
Lawrence et al. 2006	846D	9	5	93-94	84.73	95.13	81.0752	0.88127	0.88127	25.3718	24.7726
Lawrence et al. 2006	846D	9	5	103-104	84.83	95.23	81.1552	0.878887	0.878887	25.2996	24.7025
Lawrence et al. 2006	846D	9	5	113-114	84.93	95.33	81.2352	0.867135	0.867135	24.9435	24.3569
Lawrence et al. 2006	846D	9	5	123-124	85.03	95.43	81.3151	0.86033	0.86033	24.7373	24.1568
Lawrence et al. 2006	846D	9	5	133-134	85.13	95.53	81.4002	0.859718	0.859718	24.7187	24.1388
Lawrence et al. 2006	846D	9	5	143-144	85.23	95.63	81.4868	0.862741	0.862741	24.8103	24.2277
Lawrence et al. 2006	846D	9	6	3-4	85.33	95.73	81.5735	0.841235	0.841235	24.1586	23.5952
Lawrence et al. 2006	846D	9	6	13-14	85.43	95.83	81.6583	0.84887	0.84887	24.39	23.8197
Lawrence et al. 2006	846D	9	6	23-24	85.53	95.93	81.7383	0.857158	0.857158	24.6411	24.0635
Lawrence et al. 2006	846D	9	6	33-34	85.63	96.03	81.8182	0.870875	0.870875	25.0568	24.4669
Lawrence et al. 2006	846D	9	6	43-44	85.73	96.13	81.8982	0.886915	0.886915	25.5429	24.9387
Lawrence et al. 2006	846D	9	6	43-44	85.73	96.13	81.8982	0.888027	0.888027	25.5766	24.9714
Lawrence et al. 2006	846C	9	5	43	84.93	96.18	81.9379	0.904833	0.904833	26.0858	25.4657
Lawrence et al. 2006	846D	9	6	53-54	85.83	96.23	81.9776	0.898797	0.898797	25.903	25.2882
Lawrence et al. 2006	846C	9	5	53	85.03	96.28	82.017	0.90503	0.90503	26.0918	25.4715
Lawrence et al. 2006	846D	9	6	63-64	85.93	96.33	82.0563	0.894258	0.894258	25.7654	25.1546
Lawrence et al. 2006	846C	9	5	63	85.13	96.38	82.0957	0.892277	0.892277	25.7054	25.0964
Lawrence et al. 2006	846D	9	6	73-74	86.03	96.43	82.1351	0.873533	0.873533	25.1374	24.5451
Lawrence et al. 2006	846C	9	5	73	85.23	96.48	82.1745	0.874789	0.874789	25.1754	24.582
Lawrence et al. 2006	846D	9	6	83-84	86.13	96.53	82.2139	0.821812	0.821812	23.5701	23.0239
Lawrence et al. 2006	846C	9	5	83	85.33	96.58	82.2533	0.817023	0.817023	23.4249	22.883
Lawrence et al. 2006	846D	9	6	93-94	86.23	96.63	82.2926	0.833829	0.833829	23.9342	23.3773
Lawrence et al. 2006	846C	9	5	93	85.43	96.68	82.332	0.825747	0.825747	23.6893	23.1396
Lawrence et al. 2006	846D	9	6	103-104	86.33	96.73	82.3714	0.817788	0.817788	23.4481	22.9055
Lawrence et al. 2006	846C	9	5	103	85.53	96.78	82.4108	0.828003	0.828003	23.7577	23.206
Lawrence et al. 2006	846D	9	6	113-114	86.43	96.83	82.4502	0.828747	0.828747	23.7802	23.2279
Lawrence et al. 2006	846C	9	5	113	85.63	96.88	82.4895	0.823869	0.823869	23.6324	23.0844
Lawrence et al. 2006	846D	9	6	123-124	86.53	96.93	82.5289	0.837637	0.837637	24.0496	23.4893
Lawrence et al. 2006	846C	9	5	123	85.73	96.98	82.5683	0.830566	0.830566	23.8353	23.2814
Lawrence et al. 2006	846D	9	6	133-134	86.63	97.03	82.6076	0.83504	0.83504	23.9709	23.4129
Lawrence et al. 2006	846C	9	5	133	85.83	97.08	82.647	0.837416	0.837416	24.0429	23.4828
Lawrence et al. 2006	846D	9	6	143-144	86.73	97.13	82.6864	0.839421	0.839421	24.1037	23.5418
Lawrence et al. 2006	846C	9	5	143	85.93	97.18	82.7375	0.847353	0.847353	24.344	23.7751
Lawrence et al. 2006	846C	9	6	3	86.03	97.28	82.8397	0.834948	0.834948	23.9681	23.4102
Lawrence et al. 2006	846C	9	6	13	86.13	97.38	82.9419	0.82828	0.82828	23.7661	23.2141
Lawrence et al. 2006	846C	9	6	23	86.23	97.48	83.0441	0.820806	0.820806	23.5396	22.9943
Lawrence et al. 2006	846C	9	6	33	86.33	97.58	83.1463	0.842441	0.842441	24.1952	23.6306
Lawrence et al. 2006	846C	9	6	43	86.43	97.68	83.2485	0.853308	0.853308	24.5245	23.9502
Lawrence et al. 2006	846C	9	6	53	86.53	97.78	83.3507	0.85137	0.85137	24.4658	23.8932
Lawrence et al. 2006	846C	9	6	63	86.63	97.88	83.4529	0.866137	0.866137	24.9132	24.3276
Lawrence et al. 2006	846C	9	6	73	86.73	97.98	83.555	0.876328	0.876328	25.2221	24.6273
Lawrence et al. 2006	846C	9	6	83	86.83	98.08	83.6572	0.874889	0.874889	25.1784	24.585
Lawrence et al. 2006	846C	9	6	93	86.93	98.18	83.7594	0.891884	0.891884	25.6935	25.0848
Lawrence et al. 2006	846C	9	6	103	87.03	98.28	83.8616	0.906474	0.906474	26.1356	25.514
Lawrence et al. 2006	846C	9	6	113	87.13	98.38	83.9638	0.899846	0.899846	25.9347	25.319
Lawrence et al. 2006	846C	9	6	123	87.23	98.48	84.066	0.918693	0.918693	26.5058	25.8733
Lawrence et al. 2006	846D	10	1	13-14	87.43	98.73	84.3062	0.903771	0.903771	26.0537	25.4345
Lawrence et al. 2006	846D	10	1	23-24	87.53	98.83	84.4	0.902632	0.902632	26.0191	25.4009
Lawrence et al. 2006	846D	10	1	33-34	87.63	98.93	84.4939	0.896746	0.896746	25.8408	25.2278
Lawrence et al. 2006	846D	10	1	43-44	87.73	99.03	84.5877	0.881957	0.881957	25.3926	24.7929
Lawrence et al. 2006	846D	10	1	53-54	87.83	99.13	84.6815	0.883651	0.883651	25.444	24.8427
Lawrence et al. 2006	846D	10	1	63-64	87.93	99.23	84.7754	0.888028	0.888028	25.5766	24.9714
Lawrence et al. 2006	846D	10	1	73-74	88.03	99.33	84.8692	0.882743	0.882743	25.4164	24.816
Lawrence et al. 2006	846D	10	1	83-84	88.13	99.43	84.9629	0.895031	0.895031	25.7888	25.1774
Lawrence et al. 2006	846D	10	1	83-84	88.13	99.43	84.9629	0.891775	0.891775	25.6902	25.0816
Lawrence et al. 2006	846D	10	1	93-94	88.23	99.53	85.0496	0.899722	0.899722	25.931	25.3153
Lawrence et al. 2006	846D	10	1	93-94	88.23	99.53	85.0496	0.896069	0.896069	25.8203	25.2079
Lawrence et al. 2006	846D	10	1	103-104	88.33	99.63	85.1362	0.900289	0.900289	25.9482	25.332
Lawrence et al. 2006	846D	10	1	103-104	88.33	99.63	85.1362	0.903207	0.903207	26.0366	25.4179
Lawrence et al. 2006	846D	10	1	113-114	88.43	99.73	85.2184	0.906289	0.906289	26.13	25.5085
Lawrence et al. 2006	846D	10	1	113-114	88.43	99.73	85.2184	0.90545	0.90545	26.1046	25.4838
Lawrence et al. 2006	846D	10	1	123-124	88.53	99.83	85.2983	0.908177	0.908177	26.1872	25.564
Lawrence et al. 2006	846D	10	1	123-124	88.53	99.83	85.2983	0.907913	0.907913	26.1792	25.5563
Lawrence et al. 2006	846D	10	1	133-134	88.63	99.93	85.3783	0.902055	0.902055	26.0017	25.384
Lawrence et al. 2006	846D	10	1	133-134	88.63	99.93	85.3783	0.90286	0.90286	26.026	25.4076
Lawrence et al. 2006	846D	10	1	143-144	88.73	100.03	85.4582	0.915587	0.915587	26.4117	25.782
Lawrence et al. 2006	846D	10	1	143-144	88.73	100.03	85.4582	0.918097	0.918097	26.4878	25.8558
Lawrence et al. 2006	846D	10	2	3-4	88.83	100.13	85.5382	0.919286	0.919286	26.5238	25.8908
Lawrence et al. 2006	846D	10	2	3-4	88.83	100.13	85.5382	0.921202	0.921202	26.5819	25.9471
Lawrence et al. 2006	846D	10	2	13-14	88.93	100.23	85.6181	0.927573	0.927573	26.7749	26.1345
Lawrence et al. 2006	846D	10	2	13-14	88.93	100.23	85.6181	0.925456	0.925456	26.7108	26.0722
Lawrence et al. 2006	846D	10	2	23-24	89.03	100.33	85.698	0.925754	0.925754	26.7198	26.081
Lawrence et al. 2006	846D	10	2	23-24	89.03	100.33	85.698	0.938449	0.938449	27.1045	26.4544
Lawrence et al. 2006	846D	10	2	33-34	89.13	100.43	85.779	0.922141	0.922141	26.6103	25.9747
Lawrence et al. 2006	846D	10	2	33-34	89.13	100.43	85.779	0.918725	0.918725	26.5068	25.8743
Lawrence et al. 2006	846D	10	2	43-44	89.23	100.53	85.8717	0.90604	0.90604	26.1224	25.5012
Lawrence et al. 2006	846D	10	2	43-44	89.23	100.53	85.8717	0.90758	0.90758	26.1691	25.5465
Lawrence et al. 2006	846D	10	2	53-54	89.33	100.63	85.9656	0.905948	0.905948	26.1196	25.4985
Lawrence et al. 2006	846D	10	2	53-54	89.33	100.63	85.9656	0.908422	0.908422	26.1946	25.5712
Lawrence et al. 2006	846D	10	2	63-64	89.43	100.73	86.0594	0.90225	0.90225	26.0076	25.3897
Lawrence et al. 2006	846D	10	2	73-74	89.53	100.83	86.1532	0.900115	0.900115	25.9429	25.3269
Lawrence et al. 2006	846D	10	2	83-84	89.63	100.93	86.247	0.890526	0.890526	25.6523	25.0449
Lawrence et al. 2006	846D	10	2	93-94	89.73	101.03	86.3408	0.869512	0.869512	25.0155	24.4268
Lawrence et al. 2006	846D	10	2	103-104	89.83	101.13	86.4346	0.860135	0.860135	24.7314	24.151
Lawrence et al. 2006	846D	10	2	113-114	89.93	101.23	86.5223	0.849488	0.849488	24.4087	23.8379
Lawrence et al. 2006	846D	10	2	123-124	90.03	101.33	86.6092	0.847236	0.847236	24.3405	23.7716
Lawrence et al. 2006	846D	10	2	133-134	90.13	101.43	86.696	0.849379	0.849379	24.4054	23.8347
Lawrence et al. 2006	846D	10	2	143-144	90.23	101.53	86.7868	0.873326	0.873326	25.1311	24.539
Lawrence et al. 2006	846D	10	3	3-4	90.33	101.63	86.8809	0.899936	0.899936	25.9375	25.3217
Lawrence et al. 2006	846D	10	3	13-14	90.43	101.73	86.975	0.906577	0.906577	26.1387	25.517
Lawrence et al. 2006	846D	10	3	13-14	90.43	101.73	86.975	0.903582	0.903582	26.0479	25.4289
Lawrence et al. 2006	846D	10	3	23-24	90.53	101.83	87.069	0.88916	0.88916	25.6109	25.0047
Lawrence et al. 2006	846D	10	3	23-24	90.53	101.83	87.069	0.882495	0.882495	25.4089	24.8087
Lawrence et al. 2006	846D	10	3	33-34	90.63	101.93	87.1628	0.88723	0.88723	25.5524	24.9479
Lawrence et al. 2006	846D	10	3	43-44	90.73	102.03	87.2566	0.879135	0.879135	25.3071	24.7098
Lawrence et al. 2006	846D	10	3	53-54	90.83	102.13	87.3504	0.881279	0.881279	25.3721	24.7729
Lawrence et al. 2006	846D	10	3	63-64	90.93	102.23	87.4442	0.898327	0.898327	25.8887	25.2743
Lawrence et al. 2006	846D	10	3	73-74	91.03	102.33	87.538	0.897291	0.897291	25.8573	25.2439
Lawrence et al. 2006	846D	10	3	83-84	91.13	102.43	87.6318	0.897193	0.897193	25.8543	25.241
Lawrence et al. 2006	846D	10	3	93-94	91.23	102.53	87.7241	0.885416	0.885416	25.4975	24.8946
Lawrence et al. 2006	846D	10	3	103-104	91.33	102.63	87.811	0.886282	0.886282	25.5237	24.9201
Lawrence et al. 2006	846D	10	3	113-114	91.43	102.73	87.8973	0.870784	0.870784	25.0541	24.4642
Lawrence et al. 2006	846D	10	3	123-124	91.53	102.83	87.9838	0.866123	0.866123	24.9128	24.3271
Lawrence et al. 2006	846D	10	3	133-134	91.63	102.93	88.0707	0.863437	0.863437	24.8314	24.2482
Lawrence et al. 2006	846D	10	3	143-144	91.73	103.03	88.1575	0.849714	0.849714	24.4156	23.8445
Lawrence et al. 2006	846D	10	4	3-4	91.83	103.13	88.244	0.854984	0.854984	24.5753	23.9995
Lawrence et al. 2006	846D	10	4	13-14	91.93	103.23	88.3303	0.863593	0.863593	24.8361	24.2527
Lawrence et al. 2006	846D	10	4	23-24	92.03	103.33	88.4177	0.871151	0.871151	25.0652	24.475
Lawrence et al. 2006	846D	10	4	33-34	92.13	103.43	88.5114	0.87077	0.87077	25.0536	24.4638
Lawrence et al. 2006	846D	10	4	43-44	92.23	103.53	88.6052	0.891192	0.891192	25.6725	25.0645
Lawrence et al. 2006	846D	10	4	53-54	92.33	103.63	88.699	0.901189	0.901189	25.9754	25.3585
Lawrence et al. 2006	846D	10	4	63-64	92.43	103.73	88.7864	0.9056	0.9056	26.1091	25.4882
Lawrence et al. 2006	846D	10	4	73-74	92.53	103.83	88.8651	0.905854	0.905854	26.1168	25.4957
Lawrence et al. 2006	846D	10	4	83-84	92.63	103.93	88.9439	0.909902	0.909902	26.2394	25.6148
Lawrence et al. 2006	846D	10	4	93-94	92.73	104.03	89.0225	0.894038	0.894038	25.7587	25.1482
Lawrence et al. 2006	846D	10	4	103-104	92.83	104.13	89.1007	0.897531	0.897531	25.8646	25.2509
Lawrence et al. 2006	846D	10	4	113-114	92.93	104.23	89.1788	0.921647	0.921647	26.5954	25.9602
Lawrence et al. 2006	846D	10	4	123-124	93.03	104.33	89.2567	0.916285	0.916285	26.4329	25.8025
Lawrence et al. 2006	846D	10	4	133-134	93.13	104.43	89.3336	0.909	0.909	26.2121	25.5882
Lawrence et al. 2006	846D	10	4	143-144	93.23	104.53	89.4105	0.902306	0.902306	26.0093	25.3914
Lawrence et al. 2006	846D	10	5	3-4	93.33	104.63	89.4869	0.894447	0.894447	25.7711	25.1602
Lawrence et al. 2006	846D	10	5	13-14	93.43	104.73	89.5629	0.891437	0.891437	25.6799	25.0717
Lawrence et al. 2006	846D	10	5	23-24	93.53	104.83	89.6388	0.897157	0.897157	25.8532	25.2399
Lawrence et al. 2006	846D	10	5	33-34	93.63	104.93	89.7144	0.894597	0.894597	25.7757	25.1646
Lawrence et al. 2006	846D	10	5	43-44	93.73	105.03	89.7901	0.899385	0.899385	25.9208	25.3055
Lawrence et al. 2006	846D	10	5	53-54	93.83	105.13	89.8657	0.884515	0.884515	25.4702	24.8681
Lawrence et al. 2006	846D	10	5	53-54	93.83	105.13	89.8657	0.886201	0.886201	25.5212	24.9177
Lawrence et al. 2006	846D	10	5	63-64	93.93	105.23	89.9414	0.886201	0.886201	25.5212	24.9177
Lawrence et al. 2006	846D	10	5	73-74	94.03	105.33	90.0179	0.888702	0.888702	25.597	24.9912
Lawrence et al. 2006	846D	10	5	83-84	94.13	105.43	90.0952	0.885541	0.885541	25.5012	24.8983
Lawrence et al. 2006	846D	10	5	93-94	94.23	105.53	90.1724	0.87233	0.87233	25.1009	24.5097
Lawrence et al. 2006	846D	10	5	103-104	94.33	105.63	90.2502	0.857612	0.857612	24.6549	24.0768
Lawrence et al. 2006	846D	10	5	113-114	94.43	105.73	90.3281	0.851267	0.851267	24.4626	23.8902
Lawrence et al. 2006	846D	10	5	123-124	94.53	105.83	90.406	0.844648	0.844648	24.2621	23.6955
Lawrence et al. 2006	846D	10	5	133-134	94.63	105.93	90.4847	0.859427	0.859427	24.7099	24.1302
Lawrence et al. 2006	846D	10	5	143-144	94.73	106.03	90.5634	0.856253	0.856253	24.6137	24.0368
Lawrence et al. 2006	846D	10	6	3-4	94.83	106.13	90.6422	0.853187	0.853187	24.5208	23.9467
Lawrence et al. 2006	846D	10	6	13-14	94.93	106.23	90.732	0.82739	0.82739	23.7391	23.1879
Lawrence et al. 2006	846D	10	6	13-14	94.93	106.23	90.732	0.822975	0.822975	23.6053	23.0581
Lawrence et al. 2006	846D	10	6	23-24	95.03	106.33	90.8258	0.837935	0.837935	24.0586	23.4981
Lawrence et al. 2006	846D	10	6	33-34	95.13	106.43	90.9196	0.836177	0.836177	24.0054	23.4464
Lawrence et al. 2006	846D	10	6	43-44	95.23	106.53	91.0136	0.839702	0.839702	24.1122	23.5501
Lawrence et al. 2006	846D	10	6	53-54	95.33	106.63	91.1101	0.847015	0.847015	24.3338	23.7652
Lawrence et al. 2006	846D	10	6	63-64	95.43	106.73	91.2066	0.853344	0.853344	24.5256	23.9513
Lawrence et al. 2006	846D	10	6	73-74	95.53	106.83	91.3029	0.854256	0.854256	24.5532	23.9781
Lawrence et al. 2006	846D	10	6	83-84	95.63	106.93	91.399	0.853616	0.853616	24.5338	23.9593
Lawrence et al. 2006	846D	10	6	93-94	95.73	107.03	91.4951	0.857057	0.857057	24.6381	24.0605
Lawrence et al. 2006	846D	10	6	103-104	95.83	107.13	91.5926	0.858801	0.858801	24.691	24.1118
Lawrence et al. 2006	846D	10	6	113-114	95.93	107.23	91.6904	0.863288	0.863288	24.8269	24.2438
Lawrence et al. 2006	846D	10	6	123-124	96.03	107.33	91.7886	0.870464	0.870464	25.0444	24.4548
Lawrence et al. 2006	846D	10	6	133-134	96.13	107.43	91.8873	0.876208	0.876208	25.2184	24.6238
Lawrence et al. 2006	846D	10	6	133-134	96.13	107.43	91.8873	0.876847	0.876847	25.2378	24.6426
Lawrence et al. 2006	846D	10	6	143-144	96.23	107.53	91.9874	0.866822	0.866822	24.934	24.3477
Lawrence et al. 2006	846D	10	7	3-4	96.33	107.63	92.0887	0.876304	0.876304	25.2213	24.6266
Lawrence et al. 2006	846D	10	7	13-14	96.43	107.73	92.1917	0.878914	0.878914	25.3004	24.7034
Lawrence et al. 2006	846D	10	7	23-24	96.53	107.83	92.2954	0.893072	0.893072	25.7295	25.1198
Lawrence et al. 2006	846D	10	7	33-34	96.63	107.93	92.3996	0.893523	0.893523	25.7431	25.133
Lawrence et al. 2006	846D	10	7	43-44	96.73	108.03	92.5038	0.912345	0.912345	26.3135	25.6866
Lawrence et al. 2006	846D	10	7	53-54	96.83	108.13	92.6066	0.916371	0.916371	26.4355	25.805
Lawrence et al. 2006	846C	10	5	53	94.53	108.18	92.6721	0.930673	0.930673	26.8689	26.2257
Lawrence et al. 2006	846D	10	7	63-64	96.93	108.23	92.7073	0.920876	0.920876	26.572	25.9375
Lawrence et al. 2006	846C	10	5	63	94.63	108.28	92.7731	0.929145	0.929145	26.8226	26.1807
Lawrence et al. 2006	846D	10	7	73-74	97.03	108.33	92.8085	0.920526	0.920526	26.5614	25.9272
Lawrence et al. 2006	846C	10	5	73	94.73	108.38	92.8666	0.933457	0.933457	26.9533	26.3076
Lawrence et al. 2006	846C	10	5	83	94.83	108.48	92.956	0.93259	0.93259	26.927	26.2821
Lawrence et al. 2006	846C	10	5	93	94.93	108.58	93.0455	0.92769	0.92769	26.7785	26.1379
Lawrence et al. 2006	846C	10	5	103	95.03	108.68	93.1349	0.933436	0.933436	26.9526	26.3069
Lawrence et al. 2006	846C	10	5	113	95.13	108.78	93.2244	0.927302	0.927302	26.7667	26.1265
Lawrence et al. 2006	846C	10	5	123	95.23	108.88	93.3138	0.930877	0.930877	26.875	26.2317
Lawrence et al. 2006	846C	10	5	133	95.33	108.98	93.4033	0.923596	0.923596	26.6544	26.0175
Lawrence et al. 2006	846C	10	5	145	95.45	109.1	93.5106	0.91797	0.91797	26.4839	25.852
Lawrence et al. 2006	846C	10	6	3	95.53	109.18	93.5822	0.919903	0.919903	26.5425	25.9089
Lawrence et al. 2006	846C	10	6	13	95.63	109.28	93.6716	0.913369	0.913369	26.3445	25.7167
Lawrence et al. 2006	846C	10	6	23	95.73	109.38	93.7606	0.909563	0.909563	26.2292	25.6048
Lawrence et al. 2006	846D	11	1	13-14	96.93	109.33	93.7975	0.907268	0.907268	26.1596	25.5373
Lawrence et al. 2006	846C	10	6	33	95.83	109.48	93.851	0.911002	0.911002	26.2728	25.6471
Lawrence et al. 2006	846D	11	1	23-24	97.03	109.43	93.8891	0.905816	0.905816	26.1156	25.4946
Lawrence et al. 2006	846C	10	6	43	95.93	109.58	93.9453	0.90387	0.90387	26.0567	25.4373
Lawrence et al. 2006	846D	11	1	33-34	97.13	109.53	93.9852	0.911485	0.911485	26.2874	25.6613
Lawrence et al. 2006	846C	10	6	53	96.03	109.68	94.0414	0.908233	0.908233	26.1889	25.5657
Lawrence et al. 2006	846D	11	1	43-44	97.23	109.63	94.0814	0.91165	0.91165	26.2924	25.6662
Lawrence et al. 2006	846C	10	6	63	96.13	109.78	94.1377	0.911818	0.911818	26.2975	25.6711
Lawrence et al. 2006	846D	11	1	53-54	97.33	109.73	94.1778	0.902563	0.902563	26.0171	25.3989
Lawrence et al. 2006	846D	11	1	53-54	97.33	109.73	94.1778	0.90136	0.90136	25.9806	25.3635
Lawrence et al. 2006	846C	10	6	73	96.23	109.88	94.2341	0.909938	0.909938	26.2405	25.6158
Lawrence et al. 2006	846D	11	1	63-64	97.43	109.83	94.2742	0.906436	0.906436	26.1344	25.5128
Lawrence et al. 2006	846D	11	1	73-74	97.53	109.93	94.3706	0.917799	0.917799	26.4788	25.847
Lawrence et al. 2006	846D	11	1	83-84	97.63	110.03	94.4668	0.914698	0.914698	26.3848	25.7558
Lawrence et al. 2006	846D	11	1	93-94	97.73	110.13	94.5629	0.91189	0.91189	26.2997	25.6732
Lawrence et al. 2006	846D	11	1	103-104	97.83	110.23	94.6593	0.893772	0.893772	25.7507	25.1404
Lawrence et al. 2006	846D	11	1	113-114	97.93	110.33	94.7557	0.891623	0.891623	25.6855	25.0771
Lawrence et al. 2006	846D	11	1	123-124	98.03	110.43	94.8522	0.880184	0.880184	25.3389	24.7407
Lawrence et al. 2006	846D	11	1	133-134	98.13	110.53	94.9462	0.884445	0.884445	25.468	24.866
Lawrence et al. 2006	846D	11	1	143-144	98.23	110.63	95.04	0.89015	0.89015	25.6409	25.0338
Lawrence et al. 2006	846D	11	2	3-4	98.33	110.73	95.1338	0.890236	0.890236	25.6435	25.0363
Lawrence et al. 2006	846D	11	2	13-14	98.43	110.83	95.2245	0.895703	0.895703	25.8092	25.1971
Lawrence et al. 2006	846D	11	2	13-14	98.43	110.83	95.2245	0.898232	0.898232	25.8858	25.2715
Lawrence et al. 2006	846D	11	2	23-24	98.53	110.93	95.3104	0.907561	0.907561	26.1685	25.5459
Lawrence et al. 2006	846D	11	2	33-34	98.63	111.03	95.3973	0.911201	0.911201	26.2788	25.653
Lawrence et al. 2006	846D	11	2	43-44	98.73	111.13	95.4824	0.919563	0.919563	26.5322	25.8989
Lawrence et al. 2006	846D	11	2	53-54	98.83	111.23	95.5623	0.924179	0.924179	26.6721	26.0347
Lawrence et al. 2006	846D	11	2	63-64	98.93	111.33	95.6423	0.924858	0.924858	26.6927	26.0546
Lawrence et al. 2006	846D	11	2	73-74	99.03	111.43	95.7222	0.926044	0.926044	26.7286	26.0895
Lawrence et al. 2006	846D	11	2	93-94	99.23	111.63	95.8922	0.934496	0.934496	26.9847	26.3381
Lawrence et al. 2006	846D	11	2	103-104	99.33	111.73	95.9783	0.934824	0.934824	26.9947	26.3478
Lawrence et al. 2006	846D	11	2	113-114	99.43	111.83	96.0651	0.933321	0.933321	26.9491	26.3036
Lawrence et al. 2006	846D	11	2	123-124	99.53	111.93	96.1547	0.916985	0.916985	26.4541	25.8231
Lawrence et al. 2006	846D	11	2	133-134	99.63	112.03	96.2485	0.908321	0.908321	26.1915	25.5683
Lawrence et al. 2006	846D	11	2	143-144	99.73	112.13	96.3423	0.913441	0.913441	26.3467	25.7189
Lawrence et al. 2006	846D	11	2	143-144	99.73	112.13	96.3423	0.911805	0.911805	26.2971	25.6707
Lawrence et al. 2006	846D	11	3	3-4	99.83	112.23	96.4362	0.89927	0.89927	25.9173	25.3021
Lawrence et al. 2006	846D	11	3	13-14	99.93	112.33	96.5299	0.898583	0.898583	25.8965	25.2819
Lawrence et al. 2006	846D	11	3	13-14	99.93	112.33	96.5299	0.902513	0.902513	26.0155	25.3974
Lawrence et al. 2006	846D	11	3	13-14	99.93	112.33	96.5299	0.900706	0.900706	25.9608	25.3443
Lawrence et al. 2006	846D	11	3	23-24	100.03	112.43	96.6237	0.897749	0.897749	25.8712	25.2573
Lawrence et al. 2006	846D	11	3	33-34	100.13	112.53	96.7175	0.894441	0.894441	25.7709	25.16
Lawrence et al. 2006	846D	11	3	43-44	100.23	112.63	96.8084	0.893619	0.893619	25.746	25.1358
Lawrence et al. 2006	846D	11	3	53-54	100.33	112.73	96.8935	0.893835	0.893835	25.7526	25.1422
Lawrence et al. 2006	846D	11	3	63-64	100.43	112.83	96.9734	0.901615	0.901615	25.9883	25.371
Lawrence et al. 2006	846D	11	3	73-74	100.53	112.93	97.0534	0.900693	0.900693	25.9604	25.3439
Lawrence et al. 2006	846D	11	3	83-84	100.63	113.03	97.1333	0.906341	0.906341	26.1315	25.51
Lawrence et al. 2006	846D	11	3	93-94	100.73	113.13	97.2133	0.900821	0.900821	25.9643	25.3477
Lawrence et al. 2006	846D	11	3	103-104	100.83	113.23	97.2932	0.921061	0.921061	26.5776	25.943
Lawrence et al. 2006	846D	11	3	103-104	100.83	113.23	97.2932	0.916918	0.916918	26.452	25.8211
Lawrence et al. 2006	846D	11	3	103-104	100.83	113.23	97.2932	0.928003	0.928003	26.788	26.1471
Lawrence et al. 2006	846D	11	3	113-114	100.93	113.33	97.3732	0.915263	0.915263	26.4019	25.7724
Lawrence et al. 2006	846D	11	3	123-124	101.03	113.43	97.4531	0.921448	0.921448	26.5893	25.9544
Lawrence et al. 2006	846D	11	3	133-134	101.13	113.53	97.5331	0.926904	0.926904	26.7547	26.1148
Lawrence et al. 2006	846D	11	3	143-144	101.23	113.63	97.613	0.927295	0.927295	26.7665	26.1263
Lawrence et al. 2006	846D	11	4	3-4	101.33	113.73	97.693	0.914279	0.914279	26.3721	25.7435
Lawrence et al. 2006	846D	11	4	13-14	101.43	113.83	97.7729	0.91273	0.91273	26.3251	25.6979
Lawrence et al. 2006	846D	11	4	23-24	101.53	113.93	97.8529	0.895193	0.895193	25.7937	25.1821
Lawrence et al. 2006	846D	11	4	33-34	101.63	114.03	97.9328	0.893567	0.893567	25.7445	25.1343
Lawrence et al. 2006	846D	11	4	33-34	101.63	114.03	97.9328	0.895282	0.895282	25.7964	25.1848
Lawrence et al. 2006	846D	11	4	43-44	101.73	114.13	98.0127	0.882522	0.882522	25.4098	24.8095
Lawrence et al. 2006	846D	11	4	53-54	101.83	114.23	98.0937	0.885837	0.885837	25.5102	24.907
Lawrence et al. 2006	846D	11	4	63-64	101.93	114.33	98.1867	0.892762	0.892762	25.7201	25.1106
Lawrence et al. 2006	846D	11	4	73-74	102.03	114.43	98.2807	0.893564	0.893564	25.7444	25.1342
Lawrence et al. 2006	846D	11	4	83-84	102.13	114.53	98.3748	0.892332	0.892332	25.707	25.098
Lawrence et al. 2006	846D	11	4	93-94	102.23	114.63	98.4659	0.902251	0.902251	26.0076	25.3897
Lawrence et al. 2006	846D	11	4	103-104	102.33	114.73	98.5522	0.925156	0.925156	26.7017	26.0634
Lawrence et al. 2006	846D	11	4	113-114	102.43	114.83	98.6387	0.915434	0.915434	26.4071	25.7775
Lawrence et al. 2006	846D	11	4	123-124	102.53	114.93	98.7186	0.911523	0.911523	26.2886	25.6624
Lawrence et al. 2006	846D	11	4	133-134	102.63	115.03	98.7986	0.922155	0.922155	26.6108	25.9752
Lawrence et al. 2006	846D	11	4	143-144	102.73	115.13	98.8785	0.935329	0.935329	27.01	26.3626
Lawrence et al. 2006	846D	11	5	3-4	102.83	115.23	98.9582	0.921033	0.921033	26.5768	25.9422
Lawrence et al. 2006	846D	11	5	13-14	102.93	115.33	99.0369	0.904705	0.904705	26.082	25.4619
Lawrence et al. 2006	846D	11	5	23-24	103.03	115.43	99.1156	0.897331	0.897331	25.8585	25.245
Lawrence et al. 2006	846D	11	5	33-34	103.13	115.53	99.1942	0.897095	0.897095	25.8514	25.2381
Lawrence et al. 2006	846D	11	5	43-44	103.23	115.63	99.2714	0.897592	0.897592	25.8664	25.2527
Lawrence et al. 2006	846D	11	5	53-54	103.33	115.73	99.3486	0.890174	0.890174	25.6416	25.0345
Lawrence et al. 2006	846D	11	5	63-64	103.43	115.83	99.425	0.890497	0.890497	25.6514	25.044
Lawrence et al. 2006	846D	11	5	73-74	103.53	115.93	99.5007	0.869473	0.869473	25.0143	24.4257
Lawrence et al. 2006	846D	11	5	83-84	103.63	116.03	99.5762	0.865297	0.865297	24.8878	24.3028
Lawrence et al. 2006	846D	11	5	93-94	103.73	116.13	99.6507	0.85241	0.85241	24.4973	23.9238
Lawrence et al. 2006	846D	11	5	103-104	103.83	116.23	99.7249	0.872677	0.872677	25.1114	24.5199
Lawrence et al. 2006	846D	11	5	103-104	103.83	116.23	99.7249	0.873951	0.873951	25.15	24.5574
Lawrence et al. 2006	846D	11	5	113-114	103.93	116.33	99.7968	0.870568	0.870568	25.0475	24.4579
Lawrence et al. 2006	846D	11	5	123-124	104.03	116.43	99.8689	0.8368	0.8368	24.0242	23.4647
Lawrence et al. 2006	846D	11	5	133-134	104.13	116.53	99.9413	0.839508	0.839508	24.1063	23.5443
Lawrence et al. 2006	846D	11	5	143-144	104.23	116.63	100.013	0.842496	0.842496	24.1968	23.6322
Lawrence et al. 2006	846D	11	6	3-4	104.33	116.73	100.085	0.849656	0.849656	24.4138	23.8428
Lawrence et al. 2006	846D	11	6	13-14	104.43	116.83	100.158	0.851216	0.851216	24.4611	23.8887
Lawrence et al. 2006	846D	11	6	23-24	104.53	116.93	100.23	0.859849	0.859849	24.7227	24.1426
Lawrence et al. 2006	846D	11	6	33-34	104.63	117.03	100.302	0.879393	0.879393	25.3149	24.7174
Lawrence et al. 2006	846D	11	6	43-44	104.73	117.13	100.375	0.898725	0.898725	25.9008	25.286
Lawrence et al. 2006	846D	11	6	53-54	104.83	117.23	100.449	0.905501	0.905501	26.1061	25.4853
Lawrence et al. 2006	846D	11	6	63-64	104.93	117.33	100.524	0.915741	0.915741	26.4164	25.7865
Lawrence et al. 2006	846D	11	6	73-74	105.03	117.43	100.598	0.93344	0.93344	26.9527	26.307
Lawrence et al. 2006	846D	11	6	73-74	105.03	117.43	100.598	0.927924	0.927924	26.7856	26.1448
Lawrence et al. 2006	846D	11	6	73-74	105.03	117.43	100.598	0.92277	0.92277	26.6294	25.9932
Lawrence et al. 2006	846D	11	6	83-84	105.13	117.53	100.673	0.928355	0.928355	26.7986	26.1575
Lawrence et al. 2006	846D	11	6	83-84	105.13	117.53	100.673	0.925247	0.925247	26.7045	26.0661
Lawrence et al. 2006	846D	11	6	93-94	105.23	117.63	100.748	0.930076	0.930076	26.8508	26.2081
Lawrence et al. 2006	846D	11	6	93-94	105.23	117.63	100.748	0.923313	0.923313	26.6459	26.0092
Lawrence et al. 2006	846D	11	6	103-104	105.33	117.73	100.824	0.927799	0.927799	26.7818	26.1411
Lawrence et al. 2006	846D	11	6	103-104	105.33	117.73	100.824	0.927749	0.927749	26.7803	26.1397
Lawrence et al. 2006	846D	11	6	113-114	105.43	117.83	100.9	0.913935	0.913935	26.3617	25.7334
Lawrence et al. 2006	846D	11	6	113-114	105.43	117.83	100.9	0.907574	0.907574	26.1689	25.5463
Lawrence et al. 2006	846D	11	6	123-124	105.53	117.93	100.976	0.925989	0.925989	26.7269	26.0879
Lawrence et al. 2006	846D	11	6	123-124	105.53	117.93	100.976	0.914636	0.914636	26.3829	25.754
Lawrence et al. 2006	846C	11	5	33	103.83	117.93	101.013	0.912781	0.912781	26.3267	25.6994
Lawrence et al. 2006	846D	11	6	133-134	105.63	118.03	101.052	0.921301	0.921301	26.5849	25.95
Lawrence et al. 2006	846D	11	6	133-134	105.63	118.03	101.052	0.912914	0.912914	26.3307	25.7033
Lawrence et al. 2006	846C	11	5	43	103.93	118.03	101.095	0.918901	0.918901	26.5122	25.8794
Lawrence et al. 2006	846D	11	6	143-144	105.73	118.13	101.128	0.92122	0.92122	26.5824	25.9476
Lawrence et al. 2006	846D	11	6	143-144	105.73	118.13	101.128	0.921266	0.921266	26.5838	25.949
this study	846B	12	1	100	103	117.81	101.133	0.906144	0.912144	26.3074	25.6807
Lawrence et al. 2006	846C	11	5	53	104.03	118.13	101.193	0.909162	0.909162	26.217	25.593
Lawrence et al. 2006	846D	11	7	3-4	105.83	118.23	101.203	0.918798	0.918798	26.509	25.8764
Lawrence et al. 2006	846D	11	7	3-4	105.83	118.23	101.203	0.917083	0.917083	26.4571	25.826
this study	846B	12	1	110	103.1	117.91	101.231	0.90036	0.90636	26.1321	25.5106
Lawrence et al. 2006	846C	11	5	63	104.13	118.23	101.264	0.915154	0.915154	26.3986	25.7692
Lawrence et al. 2006	846D	11	7	13-14	105.93	118.33	101.279	0.918041	0.918041	26.4861	25.8541
Lawrence et al. 2006	846D	11	7	13-14	105.93	118.33	101.279	0.904375	0.904375	26.072	25.4522
this study	846B	12	1	122	103.22	118.03	101.348	0.907042	0.913042	26.3346	25.7071
Lawrence et al. 2006	846C	11	5	73	104.23	118.33	101.379	0.903626	0.903626	26.0493	25.4302
this study	846B	12	1	131	103.31	118.12	101.436	0.908335	0.914335	26.3738	25.7451
this study	846B	12	1	138	103.38	118.19	101.504	0.902027	0.908027	26.1826	25.5596
Lawrence et al. 2006	846C	11	5	83	104.33	118.43	101.586	0.893183	0.893183	25.7328	25.123
this study	846B	12	2	4	103.54	118.35	101.66	0.895216	0.901216	25.9763	25.3593
this study	846B	12	2	14	103.64	118.45	101.758	0.874276	0.880276	25.3417	24.7434
Lawrence et al. 2006	846C	11	5	93	104.43	118.53	101.793	0.879749	0.879749	25.3257	24.7279
this study	846B	12	2	35	103.85	118.66	101.965	0.864084	0.870084	25.0328	24.4436
Lawrence et al. 2006	846C	11	5	103	104.53	118.63	102	0.87201	0.87201	25.0912	24.5003
this study	846B	12	2	44	103.94	118.75	102.054	0.86212	0.86812	24.9733	24.3859
Lawrence et al. 2006	846C	11	5	113	104.63	118.73	102.09	0.876111	0.876111	25.2155	24.6209
this study	846B	12	2	54	104.04	118.85	102.153	0.880617	0.886617	25.5338	24.9299
Lawrence et al. 2006	846C	11	5	123	104.73	118.83	102.18	0.882709	0.882709	25.4154	24.815
this study	846B	12	2	64	104.14	118.95	102.251	0.879057	0.885057	25.4866	24.884
Lawrence et al. 2006	846C	11	5	133	104.83	118.93	102.27	0.896789	0.896789	25.8421	25.2291
Lawrence et al. 2006	846C	11	5	143	104.93	119.03	102.36	0.908273	0.908273	26.1901	25.5668
this study	846B	12	2	76	104.26	119.07	102.37	0.879459	0.885459	25.4988	24.8959
Lawrence et al. 2006	846C	11	6	3	105.03	119.13	102.45	0.89206	0.89206	25.6988	25.09
this study	846B	12	2	85	104.35	119.16	102.459	0.894115	0.900115	25.9429	25.3269
Lawrence et al. 2006	846C	11	6	13	105.13	119.23	102.54	0.898093	0.898093	25.8816	25.2675
this study	846B	12	2	94	104.44	119.25	102.549	0.889273	0.895273	25.7961	25.1845
Lawrence et al. 2006	846C	11	6	23	105.23	119.33	102.63	0.899527	0.899527	25.9251	25.3096
this study	846B	12	2	104	104.54	119.35	102.649	0.908644	0.914644	26.3831	25.7542
Lawrence et al. 2006	846C	11	6	33	105.33	119.43	102.72	0.917923	0.917923	26.4825	25.8507
this study	846B	12	2	116	104.66	119.47	102.769	0.908041	0.914041	26.3649	25.7365
Lawrence et al. 2006	846C	11	6	43	105.43	119.53	102.81	0.91511	0.91511	26.3973	25.7679
this study	846B	12	2	124	104.74	119.55	102.849	0.876603	0.882603	25.4122	24.8119
Lawrence et al. 2006	846C	11	6	53	105.53	119.63	102.929	0.890959	0.890959	25.6654	25.0576
this study	846B	12	2	134	104.84	119.65	102.949	0.888541	0.894541	25.774	25.163
Lawrence et al. 2006	846C	11	6	63	105.63	119.73	103.049	0.882583	0.882583	25.4116	24.8113
this study	846B	12	2	144	104.94	119.75	103.049	0.870251	0.876251	25.2197	24.625
this study	846B	12	3	4	105.04	119.85	103.149	0.86938	0.87538	25.1933	24.5994
Lawrence et al. 2006	846C	11	6	73	105.73	119.83	103.168	0.879665	0.879665	25.3232	24.7255
this study	846B	12	3	14	105.14	119.95	103.248	0.870369	0.876369	25.2233	24.6285
Lawrence et al. 2006	846C	11	6	83	105.83	119.93	103.28	0.88241	0.88241	25.4064	24.8062
Lawrence et al. 2006	846D	12	1	13-14	106.43	119.93	103.347	0.883097	0.883097	25.4272	24.8264
this study	846B	12	3	24	105.24	120.05	103.348	0.872093	0.878093	25.2755	24.6792
Lawrence et al. 2006	846C	11	6	93	105.93	120.03	103.368	0.885859	0.885859	25.5109	24.9076
Lawrence et al. 2006	846D	12	1	23-24	106.53	120.03	103.433	0.878766	0.878766	25.2959	24.699
this study	846B	12	3	34	105.34	120.15	103.448	0.869702	0.875702	25.2031	24.6089
Lawrence et al. 2006	846C	11	6	93	106.03	120.13	103.454	0.879862	0.879862	25.3291	24.7312
Lawrence et al. 2006	846D	12	1	33-34	106.63	120.13	103.519	0.882133	0.882133	25.398	24.798
Lawrence et al. 2006	846C	11	6	113	106.13	120.23	103.54	0.882116	0.882116	25.3974	24.7975
this study	846B	12	3	44	105.44	120.25	103.548	0.867925	0.873925	25.1492	24.5566
Lawrence et al. 2006	846D	12	1	43-44	106.73	120.23	103.606	0.882931	0.882931	25.4221	24.8215
Lawrence et al. 2006	846C	11	6	123	106.23	120.33	103.627	0.883013	0.883013	25.4246	24.8239
this study	846B	12	3	54	105.54	120.35	103.648	0.860572	0.866572	24.9264	24.3403
Lawrence et al. 2006	846D	12	1	53-54	106.83	120.33	103.693	0.874466	0.874466	25.1656	24.5725
Lawrence et al. 2006	846C	11	6	133	106.33	120.43	103.714	0.872536	0.872536	25.1071	24.5158
this study	846B	12	3	63	105.63	120.44	103.738	0.864216	0.870216	25.0368	24.4475
Lawrence et al. 2006	846D	12	1	63-64	106.93	120.43	103.78	0.873616	0.873616	25.1399	24.5475
Lawrence et al. 2006	846C	11	6	143	106.43	120.53	103.801	0.875846	0.875846	25.2074	24.6131
this study	846B	12	3	74	105.74	120.55	103.846	0.861924	0.867924	24.9674	24.3801
Lawrence et al. 2006	846D	12	1	73-74	107.03	120.53	103.866	0.873322	0.873322	25.131	24.5389
Lawrence et al. 2006	846D	12	1	83-84	107.13	120.63	103.952	0.87322	0.87322	25.1279	24.5359
this study	846B	12	3	85	105.85	120.66	103.954	0.859825	0.865825	24.9038	24.3184
Lawrence et al. 2006	846D	12	1	93-94	107.23	120.73	104.04	0.874357	0.874357	25.1623	24.5693
this study	846B	12	3	94	105.94	120.75	104.042	0.868216	0.874216	25.1581	24.5652
Lawrence et al. 2006	846D	12	1	103-104	107.33	120.83	104.127	0.879558	0.879558	25.3199	24.7223
this study	846B	12	3	104	106.04	120.85	104.139	0.871107	0.877107	25.2457	24.6502
Lawrence et al. 2006	846D	12	1	113-114	107.43	120.93	104.213	0.882078	0.882078	25.3963	24.7964
this study	846B	12	3	114	106.14	120.95	104.237	0.874206	0.880206	25.3396	24.7414
Lawrence et al. 2006	846D	12	1	123-124	107.53	121.03	104.301	0.880894	0.880894	25.3604	24.7616
this study	846B	12	3	124	106.24	121.05	104.335	0.87858	0.88458	25.4721	24.87
Lawrence et al. 2006	846D	12	1	133-134	107.63	121.13	104.395	0.89393	0.89393	25.7555	25.145
this study	846B	12	3	134	106.34	121.15	104.42	0.868827	0.874827	25.1766	24.5832
Lawrence et al. 2006	846D	12	1	143-144	107.73	121.23	104.489	0.885031	0.885031	25.4858	24.8833
this study	846B	12	3	144	106.44	121.25	104.506	0.890268	0.896268	25.8263	25.2138
this study	846B	12	4	2	106.52	121.33	104.575	0.89942	0.90542	26.1036	25.483
Lawrence et al. 2006	846D	12	2	3-4	107.83	121.33	104.582	0.887934	0.887934	25.5738	24.9687
this study	846B	12	4	12	106.62	121.43	104.667	0.897532	0.903532	26.0464	25.4274
Lawrence et al. 2006	846D	12	2	13-14	107.93	121.43	104.678	0.900094	0.900094	25.9422	25.3263
this study	846B	12	4	22	106.72	121.53	104.762	0.895037	0.901037	25.9708	25.354
Lawrence et al. 2006	846D	12	2	23-24	108.03	121.53	104.775	0.905178	0.905178	26.0963	25.4758
this study	846B	12	4	32	106.82	121.63	104.857	0.895098	0.901098	25.9727	25.3558
Lawrence et al. 2006	846D	12	2	33-34	108.13	121.63	104.871	0.890908	0.890908	25.6639	25.0561
Lawrence et al. 2006	846D	12	2	33-34	108.13	121.63	104.871	0.892593	0.892593	25.715	25.1057
this study	846B	12	4	42	106.92	121.73	104.945	0.885395	0.891395	25.6786	25.0704
Lawrence et al. 2006	846D	12	2	43-44	108.23	121.73	104.968	0.890454	0.890454	25.6501	25.0428
this study	846B	12	4	52	107.02	121.83	105.031	0.88337	0.88937	25.6173	25.0109
Lawrence et al. 2006	846D	12	2	53-54	108.33	121.83	105.064	0.879858	0.879858	25.329	24.7311
this study	846B	12	4	62	107.12	121.93	105.118	0.87709	0.88309	25.427	24.8262
Lawrence et al. 2006	846D	12	2	63-64	108.43	121.93	105.153	0.874953	0.874953	25.1804	24.5868
this study	846B	12	4	72	107.22	122.03	105.203	0.883791	0.889791	25.63	25.0233
Lawrence et al. 2006	846D	12	2	73-74	108.53	122.03	105.233	0.882722	0.882722	25.4158	24.8153
this study	846B	12	4	82	107.32	122.13	105.294	0.889862	0.895862	25.814	25.2018
Lawrence et al. 2006	846D	12	2	83-84	108.63	122.13	105.313	0.891312	0.891312	25.6761	25.068
this study	846B	12	4	92	107.42	122.23	105.389	0.885337	0.891337	25.6769	25.0687
Lawrence et al. 2006	846D	12	2	93-94	108.73	122.23	105.393	0.888519	0.888519	25.5915	24.9859
Lawrence et al. 2006	846D	12	2	103-104	108.83	122.33	105.473	0.899301	0.899301	25.9182	25.303
this study	846B	12	4	102	107.52	122.33	105.484	0.890296	0.896296	25.8272	25.2146
Lawrence et al. 2006	846D	12	2	113-114	108.93	122.43	105.552	0.892574	0.892574	25.7144	25.1051
this study	846B	12	4	112	107.62	122.43	105.579	0.899454	0.905454	26.1047	25.4839
Lawrence et al. 2006	846D	12	2	123-124	109.03	122.53	105.632	0.904598	0.904598	26.0787	25.4588
this study	846B	12	4	122	107.72	122.53	105.674	0.89351	0.89951	25.9245	25.3091
Lawrence et al. 2006	846D	12	2	133-134	109.13	122.63	105.712	0.912819	0.912819	26.3279	25.7006
this study	846B	12	4	132	107.82	122.63	105.768	0.90664	0.91264	26.3224	25.6953
Lawrence et al. 2006	846D	12	2	143-144	109.23	122.73	105.798	0.913949	0.913949	26.3621	25.7338
Lawrence et al. 2006	846D	12	3	3-4	109.33	122.83	105.892	0.910087	0.910087	26.245	25.6202
this study	846B	12	5	2	108.02	122.83	105.958	0.910777	0.916777	26.4478	25.817
Lawrence et al. 2006	846D	12	3	13-14	109.43	122.93	105.986	0.897601	0.897601	25.8667	25.253
this study	846B	12	5	12	108.12	122.93	106.053	0.904518	0.910518	26.2581	25.6329
Lawrence et al. 2006	846D	12	3	23-24	109.53	123.03	106.079	0.903767	0.903767	26.0536	25.4343
this study	846B	12	5	22	108.22	123.03	106.148	0.897915	0.903915	26.058	25.4387
Lawrence et al. 2006	846D	12	3	33-34	109.63	123.13	106.169	0.895996	0.895996	25.8181	25.2058
this study	846B	12	5	32	108.32	123.13	106.243	0.906594	0.912594	26.321	25.6939
Lawrence et al. 2006	846D	12	3	43-44	109.73	123.23	106.251	0.909669	0.909669	26.2324	25.6079
Lawrence et al. 2006	846D	12	3	53-54	109.83	123.33	106.331	0.919524	0.919524	26.531	25.8978
this study	846B	12	5	42	108.42	123.23	106.338	0.909634	0.915634	26.4131	25.7833
Lawrence et al. 2006	846D	12	3	63-64	109.93	123.43	106.411	0.931102	0.931102	26.8819	26.2383
this study	846B	12	5	52	108.52	123.33	106.433	0.921667	0.927667	26.7778	26.1373
Lawrence et al. 2006	846D	12	3	73-74	110.03	123.53	106.491	0.932946	0.932946	26.9377	26.2925
this study	846B	12	5	62	108.62	123.43	106.528	0.935096	0.941096	27.1847	26.5322
Lawrence et al. 2006	846D	12	3	83-84	110.13	123.63	106.577	0.938511	0.938511	27.1064	26.4562
this study	846B	12	5	72	108.72	123.53	106.621	0.932712	0.938712	27.1125	26.4621
Lawrence et al. 2006	846D	12	3	93-94	110.23	123.73	106.671	0.935017	0.935017	27.0005	26.3535
this study	846B	12	5	82	108.82	123.63	106.708	0.935714	0.941714	27.2035	26.5504
Lawrence et al. 2006	846D	12	3	103-104	110.33	123.83	106.765	0.937447	0.937447	27.0742	26.4249
Lawrence et al. 2006	846D	12	3	103-104	110.33	123.83	106.765	0.938392	0.938392	27.1028	26.4527
this study	846B	12	5	92	108.92	123.73	106.794	0.936222	0.942222	27.2189	26.5654
Lawrence et al. 2006	846D	12	3	113-114	110.43	123.93	106.859	0.936067	0.936067	27.0323	26.3843
this study	846B	12	5	102	109.02	123.83	106.88	0.929942	0.935942	27.0285	26.3806
Lawrence et al. 2006	846D	12	3	123-124	110.53	124.03	106.953	0.933513	0.933513	26.9549	26.3092
this study	846B	12	5	112	109.12	123.93	106.966	0.927345	0.933345	26.9498	26.3043
Lawrence et al. 2006	846D	12	3	133-134	110.63	124.13	107.047	0.929473	0.929473	26.8325	26.1904
this study	846B	12	5	122	109.22	124.03	107.053	0.932014	0.938014	27.0913	26.4416
this study	846B	12	5	132	109.32	124.13	107.139	0.932686	0.938686	27.1117	26.4614
Lawrence et al. 2006	846D	12	3	143-144	110.73	124.23	107.141	0.930745	0.930745	26.8711	26.2278
this study	846B	12	5	142	109.42	124.23	107.225	0.929536	0.935536	27.0162	26.3687
Lawrence et al. 2006	846D	12	4	3-4	110.83	124.33	107.234	0.929432	0.929432	26.8313	26.1892
this study	846B	12	6	2	109.52	124.33	107.312	0.925423	0.931423	26.8916	26.2477
Lawrence et al. 2006	846D	12	4	13-14	110.93	124.43	107.328	0.930957	0.930957	26.8775	26.234
this study	846B	12	6	12	109.62	124.43	107.407	0.93293	0.93893	27.1191	26.4685
Lawrence et al. 2006	846D	12	4	23-24	111.03	124.53	107.422	0.930077	0.930077	26.8508	26.2082
this study	846B	12	6	22	109.72	124.53	107.501	0.931804	0.937804	27.085	26.4354
Lawrence et al. 2006	846D	12	4	33-34	111.13	124.63	107.516	0.939317	0.939317	27.1308	26.4799
this study	846B	12	6	32	109.82	124.63	107.595	0.929397	0.935397	27.012	26.3646
Lawrence et al. 2006	846D	12	4	43-44	111.23	124.73	107.603	0.929343	0.929343	26.8286	26.1866
this study	846B	12	6	42	109.92	124.73	107.681	0.922886	0.928886	26.8147	26.1731
Lawrence et al. 2006	846D	12	4	53-54	111.33	124.83	107.683	0.931506	0.931506	26.8941	26.2502
Lawrence et al. 2006	846D	12	4	63-64	111.43	124.93	107.763	0.922281	0.922281	26.6146	25.9788
this study	846B	12	6	52	110.02	124.83	107.767	0.921934	0.927934	26.7859	26.1451
Lawrence et al. 2006	846D	12	4	73-74	111.53	125.03	107.844	0.920359	0.920359	26.5563	25.9223
this study	846B	12	6	62	110.12	124.93	107.854	0.918578	0.924578	26.6842	26.0464
Lawrence et al. 2006	846D	12	4	83-84	111.63	125.13	107.923	0.920392	0.920392	26.5573	25.9233
this study	846B	12	6	72	110.22	125.03	107.934	0.919104	0.925104	26.7001	26.0619
Lawrence et al. 2006	846D	12	4	93-94	111.73	125.23	108.002	0.909064	0.909064	26.2141	25.5901
this study	846B	12	6	82	110.32	125.13	108.013	0.917817	0.923817	26.6611	26.024
Lawrence et al. 2006	846D	12	4	103-104	111.83	125.33	108.08	0.920378	0.920378	26.5569	25.9229
this study	846B	12	6	92	110.42	125.23	108.091	0.914573	0.920573	26.5628	25.9286
Lawrence et al. 2006	846D	12	4	113-114	111.93	125.43	108.159	0.914776	0.914776	26.3871	25.7581
this study	846B	12	6	102	110.52	125.33	108.169	0.902952	0.908952	26.2107	25.5868
Lawrence et al. 2006	846D	12	4	123-124	112.03	125.53	108.237	0.909092	0.909092	26.2149	25.5909
this study	846B	12	6	112	110.62	125.43	108.248	0.902676	0.908676	26.2023	25.5787
Lawrence et al. 2006	846D	12	4	133-134	112.13	125.63	108.316	0.898366	0.898366	25.8899	25.2755
this study	846B	12	6	122	110.72	125.53	108.326	0.895879	0.901879	25.9963	25.3788
Lawrence et al. 2006	846D	12	4	143-144	112.23	125.73	108.394	0.892982	0.892982	25.7267	25.1171
this study	846B	12	6	132	110.82	125.63	108.405	0.895916	0.901916	25.9975	25.3799
Lawrence et al. 2006	846D	12	5	3-4	112.33	125.83	108.473	0.886269	0.886269	25.5233	24.9197
this study	846B	12	6	142	110.92	125.73	108.483	0.896878	0.902878	26.0266	25.4082
Lawrence et al. 2006	846D	12	5	13-14	112.43	125.93	108.552	0.884842	0.884842	25.4801	24.8777
this study	846B	12	7	2	111.02	125.83	108.561	0.888979	0.894979	25.7872	25.1759
Lawrence et al. 2006	846D	12	5	23-24	112.53	126.03	108.631	0.890002	0.890002	25.6364	25.0295
this study	846B	12	7	12	111.12	125.93	108.639	0.895959	0.901959	25.9988	25.3812
Lawrence et al. 2006	846D	12	5	33-34	112.63	126.13	108.71	0.906276	0.906276	26.1296	25.5081
this study	846B	12	7	22	111.22	126.03	108.718	0.915474	0.921474	26.5901	25.9551
Lawrence et al. 2006	846D	12	5	43-44	112.73	126.23	108.789	0.925703	0.925703	26.7183	26.0795
this study	846B	12	7	32	111.32	126.13	108.796	0.918423	0.924423	26.6795	26.0419
Lawrence et al. 2006	846D	12	5	53-54	112.83	126.33	108.868	0.943217	0.943217	27.249	26.5946
Lawrence et al. 2006	846D	12	5	53-54	112.83	126.33	108.868	0.942491	0.942491	27.227	26.5733
this study	846B	12	7	42	111.42	126.23	108.875	0.947555	0.953555	27.5623	26.8987
Lawrence et al. 2006	846D	12	5	63-64	112.93	126.43	108.955	0.944694	0.944694	27.2937	26.638
this study	846B	12	CC	2	111.52	126.33	108.963	0.937669	0.943669	27.2627	26.6079
Lawrence et al. 2006	846D	12	5	73-74	113.03	126.53	109.049	0.949223	0.949223	27.431	26.7713
this study	846B	12	CC	12	111.62	126.43	109.052	0.920884	0.926884	26.7541	26.1142
this study	846B	12	CC	22	111.72	126.53	109.141	0.917931	0.923931	26.6646	26.0274
Lawrence et al. 2006	846D	12	5	83-84	113.13	126.63	109.144	0.933122	0.933122	26.9431	26.2977
Lawrence et al. 2006	846D	12	5	93-94	113.23	126.73	109.238	0.911608	0.911608	26.2912	25.6649
Lawrence et al. 2006	846D	12	5	103-104	113.33	126.83	109.332	0.900859	0.900859	25.9654	25.3488
Lawrence et al. 2006	846D	12	5	113-114	113.43	126.93	109.425	0.898523	0.898523	25.8946	25.2801
Lawrence et al. 2006	846D	12	5	123-124	113.53	127.03	109.519	0.904915	0.904915	26.0883	25.4681
Lawrence et al. 2006	846D	12	5	133-134	113.63	127.13	109.613	0.900793	0.900793	25.9634	25.3469
Lawrence et al. 2006	846D	12	6	3-4	113.83	127.33	109.801	0.887026	0.887026	25.5463	24.942
Lawrence et al. 2006	846D	12	6	13-14	113.93	127.43	109.895	0.891375	0.891375	25.678	25.0699
Lawrence et al. 2006	846D	12	6	23-24	114.03	127.53	109.989	0.900587	0.900587	25.9572	25.3408
Lawrence et al. 2006	846D	12	6	33-34	114.13	127.63	110.082	0.915926	0.915926	26.422	25.7919
Lawrence et al. 2006	846D	12	6	43-44	114.23	127.73	110.176	0.917038	0.917038	26.4557	25.8247
Lawrence et al. 2006	846D	12	6	53-54	114.33	127.83	110.27	0.917335	0.917335	26.4647	25.8334
Lawrence et al. 2006	846D	12	6	63-64	114.43	127.93	110.363	0.915418	0.915418	26.4066	25.777
Lawrence et al. 2006	846D	12	6	73-74	114.53	128.03	110.457	0.918886	0.918886	26.5117	25.879
this study	846B	13	1	22	111.72	128.18	110.482	0.897995	0.903995	26.0605	25.441
Lawrence et al. 2006	846D	12	6	83-84	114.63	128.13	110.551	0.913258	0.913258	26.3412	25.7135
this study	846B	13	1	32	111.82	128.28	110.56	0.912521	0.918521	26.5006	25.8683
this study	846B	13	1	42	111.92	128.38	110.637	0.903466	0.909466	26.2262	25.6019
Lawrence et al. 2006	846D	12	6	93-94	114.73	128.23	110.645	0.922668	0.922668	26.6263	25.9902
this study	846B	13	1	52	112.02	128.48	110.714	0.89728	0.90328	26.0388	25.42
Lawrence et al. 2006	846D	12	6	103-104	114.83	128.33	110.739	0.912436	0.912436	26.3163	25.6893
this study	846B	13	1	62	112.12	128.58	110.792	0.892315	0.898315	25.8883	25.274
Lawrence et al. 2006	846D	12	6	113-114	114.93	128.43	110.833	0.900009	0.900009	25.9397	25.3238
this study	846B	13	1	72	112.22	128.68	110.869	0.880363	0.886363	25.5262	24.9224
Lawrence et al. 2006	846D	12	6	123-124	115.03	128.53	110.921	0.89898	0.89898	25.9085	25.2935
this study	846B	13	1	82	112.32	128.78	110.947	0.885233	0.891233	25.6737	25.0657
Lawrence et al. 2006	846D	12	6	133-134	115.13	128.63	111.001	0.901507	0.901507	25.9851	25.3679
this study	846B	13	1	92	112.42	128.88	111.024	0.880347	0.886347	25.5257	24.922
Lawrence et al. 2006	846D	12	6	143-144	115.23	128.73	111.081	0.897908	0.897908	25.876	25.262
this study	846B	13	1	102	112.52	128.98	111.102	0.881981	0.887981	25.5752	24.97
Lawrence et al. 2006	846D	12	7	3-4	115.33	128.83	111.161	0.88831	0.88831	25.5852	24.9797
Lawrence et al. 2006	846D	12	7	3-4	115.33	128.83	111.161	0.898045	0.898045	25.8802	25.266
this study	846B	13	1	112	112.62	129.08	111.18	0.884245	0.890245	25.6438	25.0366
Lawrence et al. 2006	846D	12	7	13-14	115.43	128.93	111.241	0.900999	0.900999	25.9697	25.3529
this study	846B	13	1	122	112.72	129.18	111.258	0.890693	0.896693	25.8392	25.2263
Lawrence et al. 2006	846D	12	7	23-24	115.53	129.03	111.319	0.894359	0.894359	25.7685	25.1576
this study	846B	13	1	132	112.82	129.28	111.335	0.892593	0.898593	25.8968	25.2822
Lawrence et al. 2006	846D	12	7	33-34	115.63	129.13	111.398	0.895888	0.895888	25.8148	25.2026
this study	846B	13	1	142	112.92	129.38	111.413	0.884775	0.890775	25.6599	25.0522
this study	846B	13	2	2	113.02	129.48	111.491	0.877778	0.883778	25.4478	24.8464
this study	846B	13	2	12	113.12	129.58	111.569	0.869159	0.875159	25.1866	24.5929
this study	846B	13	2	22	113.22	129.68	111.647	0.868607	0.874607	25.1699	24.5767
this study	846B	13	2	32	113.32	129.78	111.729	0.873617	0.879617	25.3217	24.724
this study	846B	13	2	42	113.42	129.88	111.824	0.879636	0.885636	25.5041	24.901
this study	846B	13	2	52	113.52	129.98	111.919	0.883839	0.889839	25.6315	25.0247
this study	846B	13	2	62	113.62	130.08	112.014	0.903609	0.909609	26.2306	25.6061
this study	846B	13	2	72	113.72	130.18	112.109	0.884367	0.890367	25.6475	25.0402
this study	846B	13	2	82	113.82	130.28	112.204	0.900258	0.906258	26.129	25.5076
this study	846B	13	2	92	113.92	130.38	112.296	0.88673	0.89273	25.7191	25.1097
this study	846B	13	2	102	114.02	130.48	112.382	0.87557	0.88157	25.3809	24.7815
this study	846B	13	2	112	114.12	130.58	112.469	0.87811	0.88411	25.4579	24.8562
Lawrence et al. 2006	846D	13	1	3-4	115.83	130.43	112.512	0.881819	0.881819	25.3885	24.7888
this study	846B	13	2	122	114.22	130.68	112.551	0.885519	0.891519	25.6824	25.0741
Lawrence et al. 2006	846D	13	1	13-14	115.93	130.53	112.572	0.903303	0.903303	26.0395	25.4207
this study	846B	13	2	132	114.32	130.78	112.629	0.890536	0.896536	25.8344	25.2217
Lawrence et al. 2006	846D	13	1	23-24	116.03	130.63	112.633	0.879429	0.879429	25.316	24.7185
Lawrence et al. 2006	846D	13	1	33-34	116.13	130.73	112.693	0.899982	0.899982	25.9389	25.323
this study	846B	13	2	142	114.42	130.88	112.707	0.900073	0.906073	26.1234	25.5021
Lawrence et al. 2006	846D	13	1	43-44	116.23	130.83	112.754	0.900739	0.900739	25.9618	25.3453
this study	846B	13	3	2	114.52	130.98	112.786	0.902605	0.908605	26.2002	25.5766
Lawrence et al. 2006	846D	13	1	53-54	116.33	130.93	112.815	0.903907	0.903907	26.0578	25.4385
this study	846B	13	3	12	114.62	131.08	112.864	0.898355	0.904355	26.0714	25.4516
Lawrence et al. 2006	846D	13	1	63-64	116.43	131.03	112.877	0.89524	0.89524	25.7952	25.1835
this study	846B	13	3	22	114.72	131.18	112.943	0.895954	0.901954	25.9986	25.381
Lawrence et al. 2006	846D	13	1	73-74	116.53	131.13	112.946	0.891706	0.891706	25.6881	25.0796
Lawrence et al. 2006	846D	13	1	83-84	116.63	131.23	113.018	0.890326	0.890326	25.6462	25.039
Lawrence et al. 2006	846D	13	1	83-84	116.63	131.23	113.018	0.88789	0.88789	25.5724	24.9673
this study	846B	13	3	32	114.82	131.28	113.022	0.887923	0.893923	25.7552	25.1448
Lawrence et al. 2006	846D	13	1	93-94	116.73	131.33	113.09	0.887637	0.887637	25.5648	24.9599
this study	846B	13	3	42	114.92	131.38	113.109	0.883139	0.889139	25.6103	25.0041
Lawrence et al. 2006	846D	13	1	103-104	116.83	131.43	113.164	0.874325	0.874325	25.1614	24.5684
this study	846B	13	3	52	115.02	131.48	113.194	0.881495	0.887495	25.5604	24.9557
Lawrence et al. 2006	846D	13	1	113-114	116.93	131.53	113.238	0.875733	0.875733	25.204	24.6098
this study	846B	13	3	62	115.12	131.58	113.281	0.872609	0.878609	25.2912	24.6944
Lawrence et al. 2006	846D	13	1	123-124	117.03	131.63	113.314	0.859234	0.859234	24.7041	24.1245
this study	846B	13	3	72	115.22	131.68	113.362	0.851354	0.857354	24.6471	24.0692
Lawrence et al. 2006	846D	13	1	133-134	117.13	131.73	113.39	0.840246	0.840246	24.1287	23.5661
this study	846B	13	3	82	115.32	131.78	113.441	0.856368	0.862368	24.799	24.2167
Lawrence et al. 2006	846D	13	1	143-144	117.23	131.83	113.467	0.843999	0.843999	24.2424	23.6764
this study	846B	13	3	92	115.42	131.88	113.519	0.837812	0.843812	24.2367	23.671
this study	846B	13	3	102	115.52	131.98	113.602	0.834016	0.840016	24.1217	23.5593
this study	846B	13	3	112	115.62	132.08	113.697	0.844838	0.850838	24.4496	23.8776
this study	846B	13	3	122	115.72	132.18	113.792	0.845499	0.851499	24.4697	23.897
this study	846B	13	3	132	115.82	132.28	113.887	0.843838	0.849838	24.4193	23.8482
this study	846B	13	3	142	115.92	132.38	113.983	0.837565	0.843565	24.2292	23.6637
this study	846B	13	3	142	115.92	132.38	113.983	0.844361	0.850361	24.4352	23.8636
this study	846B	13	4	2	116.02	132.48	114.079	0.851212	0.857212	24.6428	24.0651
this study	846B	13	4	12	116.12	132.58	114.176	0.857412	0.863412	24.8307	24.2474
this study	846B	13	4	22	116.22	132.68	114.273	0.855025	0.861025	24.7583	24.1772
this study	846B	13	4	32	116.32	132.78	114.37	0.873528	0.879528	25.319	24.7214
this study	846B	13	4	42	116.42	132.88	114.469	0.871928	0.877928	25.2705	24.6744
this study	846B	13	4	52	116.52	132.98	114.568	0.876547	0.882547	25.4105	24.8102
this study	846B	13	4	62	116.62	133.08	114.669	0.880964	0.886964	25.5444	24.9401
this study	846B	13	4	72	116.72	133.18	114.769	0.888492	0.894492	25.7725	25.1615
Lawrence et al. 2006	846D	13	3	3-4	118.83	133.43	114.845	0.898645	0.898645	25.8983	25.2837
this study	846B	13	4	82	116.82	133.28	114.87	0.896827	0.902827	26.025	25.4067
Lawrence et al. 2006	846D	13	3	13-14	118.93	133.53	114.925	0.897622	0.897622	25.8673	25.2536
Lawrence et al. 2006	846D	13	3	13-14	118.93	133.53	114.925	0.920867	0.920867	26.5717	25.9373
this study	846B	13	4	92	116.92	133.38	114.971	0.891637	0.897637	25.8678	25.254
Lawrence et al. 2006	846D	13	3	23-24	119.03	133.63	115.005	0.899417	0.899417	25.9217	25.3064
this study	846B	13	4	102	117.02	133.48	115.072	0.889875	0.895875	25.8144	25.2022
Lawrence et al. 2006	846D	13	3	33-34	119.13	133.73	115.085	0.896455	0.896455	25.832	25.2193
Lawrence et al. 2006	846D	13	3	43-44	119.23	133.83	115.165	0.884972	0.884972	25.484	24.8815
this study	846B	13	4	112	117.12	133.58	115.172	0.882831	0.888831	25.6009	24.995
Lawrence et al. 2006	846D	13	3	53-54	119.33	133.93	115.245	0.880785	0.880785	25.3571	24.7584
this study	846B	13	4	122	117.22	133.68	115.272	0.89	0.896	25.8182	25.2059
Lawrence et al. 2006	846D	13	3	63-64	119.43	134.03	115.328	0.886253	0.886253	25.5228	24.9192
this study	846B	13	4	132	117.32	133.78	115.371	0.87855	0.88455	25.4712	24.8691
Lawrence et al. 2006	846D	13	3	73-74	119.53	134.13	115.422	0.894022	0.894022	25.7582	25.1477
this study	846B	13	4	142	117.42	133.88	115.469	0.885285	0.891285	25.6753	25.0672
Lawrence et al. 2006	846D	13	3	83-84	119.63	134.23	115.516	0.901825	0.901825	25.9947	25.3772
this study	846B	13	5	2	117.52	133.98	115.567	0.889586	0.895586	25.8056	25.1937
Lawrence et al. 2006	846D	13	3	93-94	119.73	134.33	115.61	0.90518	0.90518	26.0964	25.4759
this study	846B	13	5	12	117.62	134.08	115.666	0.87239	0.87839	25.2845	24.6879
Lawrence et al. 2006	846D	13	3	103-104	119.83	134.43	115.704	0.906347	0.906347	26.1317	25.5102
this study	846B	13	5	22	117.72	134.18	115.765	0.893412	0.899412	25.9216	25.3062
Lawrence et al. 2006	846D	13	3	113-114	119.93	134.53	115.798	0.904014	0.904014	26.061	25.4416
this study	846B	13	5	32	117.82	134.28	115.863	0.893925	0.899925	25.9371	25.3213
this study	846B	13	5	42	117.92	134.38	115.961	0.888777	0.894777	25.7811	25.1699
Lawrence et al. 2006	846D	13	3	133-134	120.13	134.73	115.985	0.898503	0.898503	25.894	25.2795
this study	846B	13	5	52	118.02	134.48	116.06	0.887465	0.893465	25.7414	25.1313
Lawrence et al. 2006	846D	13	3	143-144	120.23	134.83	116.067	0.891264	0.891264	25.6747	25.0666
Lawrence et al. 2006	846D	13	4	3-4	120.33	134.93	116.147	0.886446	0.886446	25.5287	24.9249
this study	846B	13	5	62	118.12	134.58	116.159	0.879169	0.885169	25.49	24.8873
Lawrence et al. 2006	846D	13	4	13-14	120.43	135.03	116.227	0.885595	0.885595	25.5029	24.8999
this study	846B	13	5	72	118.22	134.68	116.257	0.869741	0.875741	25.2043	24.61
Lawrence et al. 2006	846D	13	4	23-24	120.53	135.13	116.307	0.881945	0.881945	25.3923	24.7925
this study	846B	13	5	82	118.32	134.78	116.354	0.873348	0.879348	25.3136	24.7161
Lawrence et al. 2006	846D	13	4	33-34	120.63	135.23	116.387	0.887009	0.887009	25.5457	24.9414
this study	846B	13	5	92	118.42	134.88	116.45	0.882951	0.888951	25.6046	24.9986
Lawrence et al. 2006	846D	13	4	43-44	120.73	135.33	116.467	0.889316	0.889316	25.6157	25.0093
this study	846B	13	5	102	118.52	134.98	116.546	0.896033	0.902033	26.001	25.3833
Lawrence et al. 2006	846D	13	4	53-54	120.83	135.43	116.546	0.903937	0.903937	26.0587	25.4393
Lawrence et al. 2006	846D	13	4	63-64	120.93	135.53	116.628	0.900839	0.900839	25.9648	25.3482
this study	846B	13	5	112	118.62	135.08	116.642	0.899316	0.905316	26.1005	25.4799
Lawrence et al. 2006	846D	13	4	73-74	121.03	135.63	116.714	0.911749	0.911749	26.2954	25.6691
Lawrence et al. 2006	846D	13	4	73-74	121.03	135.63	116.714	0.904577	0.904577	26.0781	25.4581
Lawrence et al. 2006	846D	13	4	73-74	121.03	135.63	116.714	0.907184	0.907184	26.1571	25.5348
this study	846B	13	5	122	118.72	135.18	116.737	0.903944	0.909944	26.2407	25.616
Lawrence et al. 2006	846D	13	4	83-84	121.13	135.73	116.801	0.909313	0.909313	26.2216	25.5974
this study	846B	13	5	132	118.82	135.28	116.832	0.895573	0.901573	25.9871	25.3698
Lawrence et al. 2006	846D	13	4	93-94	121.23	135.83	116.884	0.891019	0.891019	25.6672	25.0594
this study	846B	13	5	142	118.92	135.38	116.927	0.885815	0.891815	25.6914	25.0828
Lawrence et al. 2006	846D	13	4	103-104	121.33	135.93	116.964	0.880566	0.880566	25.3505	24.7519
this study	846B	13	6	2	119.02	135.48	117.016	0.870707	0.876707	25.2336	24.6385
this study	846B	13	6	12	119.12	135.58	117.102	0.854169	0.860169	24.7324	24.152
Lawrence et al. 2006	846D	13	4	123-124	121.53	136.13	117.123	0.869447	0.869447	25.0135	24.4249
Lawrence et al. 2006	846D	13	4	123-124	121.53	136.13	117.123	0.863373	0.863373	24.8295	24.2463
this study	846B	13	6	22	119.22	135.68	117.181	0.856821	0.862821	24.8128	24.23
Lawrence et al. 2006	846D	13	4	133-134	121.63	136.23	117.204	0.861361	0.861361	24.7685	24.1871
Lawrence et al. 2006	846D	13	4	133-134	121.63	136.23	117.204	0.860237	0.860237	24.7344	24.154
this study	846B	13	6	32	119.32	135.78	117.26	0.852799	0.858799	24.6909	24.1117
Lawrence et al. 2006	846D	13	4	143-144	121.73	136.33	117.284	0.85607	0.85607	24.6082	24.0315
Lawrence et al. 2006	846D	13	4	143-144	121.73	136.33	117.284	0.856348	0.856348	24.6166	24.0397
this study	846B	13	6	42	119.42	135.88	117.339	0.8484	0.8544	24.5576	23.9824
Lawrence et al. 2006	846D	13	5	3-4	121.83	136.43	117.364	0.855613	0.855613	24.5943	24.018
Lawrence et al. 2006	846D	13	5	3-4	121.83	136.43	117.364	0.857667	0.857667	24.6566	24.0784
this study	846B	13	6	52	119.52	135.98	117.417	0.852815	0.858815	24.6914	24.1122
Lawrence et al. 2006	846D	13	5	13-14	121.93	136.53	117.444	0.872169	0.872169	25.096	24.505
this study	846B	13	6	62	119.62	136.08	117.496	0.853471	0.859471	24.7113	24.1315
Lawrence et al. 2006	846D	13	5	23-24	122.03	136.63	117.524	0.862268	0.862268	24.796	24.2138
this study	846B	13	6	72	119.72	136.18	117.574	0.857616	0.863616	24.8368	24.2534
Lawrence et al. 2006	846D	13	5	33-34	122.13	136.73	117.604	0.877696	0.877696	25.2635	24.6675
this study	846B	13	6	82	119.82	136.28	117.659	0.864033	0.870033	25.0313	24.4421
Lawrence et al. 2006	846D	13	5	43-44	122.23	136.83	117.684	0.883099	0.883099	25.4272	24.8264
this study	846B	13	6	92	119.92	136.38	117.754	0.880163	0.886163	25.5201	24.9165
Lawrence et al. 2006	846D	13	5	53-54	122.33	136.93	117.765	0.89151	0.89151	25.6821	25.0738
this study	846B	13	6	102	120.02	136.48	117.848	0.88173	0.88773	25.5676	24.9626
Lawrence et al. 2006	846D	13	5	63-64	122.43	137.03	117.851	0.897261	0.897261	25.8564	25.243
Lawrence et al. 2006	846D	13	5	73-74	122.53	137.13	117.938	0.89924	0.89924	25.9164	25.3012
this study	846B	13	6	112	120.12	136.58	117.943	0.886879	0.892879	25.7236	25.1141
Lawrence et al. 2006	846D	13	5	83-84	122.63	137.23	118.031	0.894921	0.894921	25.7855	25.1741
this study	846B	13	6	122	120.22	136.68	118.038	0.884076	0.890076	25.6387	25.0316
Lawrence et al. 2006	846D	13	5	93-94	122.73	137.33	118.125	0.901233	0.901233	25.9768	25.3598
this study	846B	13	6	132	120.32	136.78	118.133	0.885508	0.891508	25.6821	25.0738
Lawrence et al. 2006	846D	13	5	103-104	122.83	137.43	118.219	0.882458	0.882458	25.4078	24.8076
this study	846B	13	6	142	120.42	136.88	118.228	0.88088	0.88688	25.5418	24.9376
Lawrence et al. 2006	846D	13	5	113-114	122.93	137.53	118.313	0.880037	0.880037	25.3345	24.7364
this study	846B	13	7	2	120.52	136.98	118.323	0.887424	0.893424	25.7401	25.1301
Lawrence et al. 2006	846D	13	5	123-124	123.03	137.63	118.406	0.878044	0.878044	25.274	24.6778
Lawrence et al. 2006	846D	13	5	123-124	123.03	137.63	118.406	0.878439	0.878439	25.286	24.6894
this study	846B	13	7	12	120.62	137.08	118.418	0.880721	0.886721	25.537	24.933
Lawrence et al. 2006	846D	13	5	133-134	123.13	137.73	118.5	0.876742	0.876742	25.2346	24.6395
Lawrence et al. 2006	846D	13	5	133-134	123.13	137.73	118.5	0.87751	0.87751	25.2579	24.6621
this study	846B	13	7	22	120.72	137.18	118.507	0.886079	0.892079	25.6994	25.0906
this study	846B	13	7	32	120.82	137.28	118.593	0.914944	0.920944	26.5741	25.9395
Lawrence et al. 2006	846D	13	5	143-144	123.23	137.83	118.594	0.88619	0.88619	25.5209	24.9174
Lawrence et al. 2006	846D	13	5	143-144	123.23	137.83	118.594	0.8838	0.8838	25.4485	24.8471
this study	846B	13	7	42	120.92	137.38	118.68	0.924675	0.930675	26.8689	26.2257
Lawrence et al. 2006	846D	13	6	3-4	123.33	137.93	118.688	0.916703	0.916703	26.4455	25.8148
this study	846B	13	7	52	121.02	137.48	118.769	0.933188	0.939188	27.1269	26.4761
Lawrence et al. 2006	846D	13	6	13-14	123.43	138.03	118.781	0.928051	0.928051	26.7894	26.1485
Lawrence et al. 2006	846D	13	6	13-14	123.43	138.03	118.781	0.927831	0.927831	26.7828	26.1421
this study	846B	13	7	62	121.12	137.58	118.864	0.941251	0.947251	27.3712	26.7133
Lawrence et al. 2006	846D	13	6	23-24	123.53	138.13	118.875	0.92792	0.92792	26.7855	26.1447
Lawrence et al. 2006	846D	13	6	33-34	123.63	138.23	118.967	0.935268	0.935268	27.0081	26.3608
Lawrence et al. 2006	846D	13	6	43-44	123.73	138.33	119.053	0.938239	0.938239	27.0981	26.4482
Lawrence et al. 2006	846D	13	6	53-54	123.83	138.43	119.14	0.936659	0.936659	27.0503	26.4017
Lawrence et al. 2006	846D	13	6	63-64	123.93	138.53	119.218	0.922034	0.922034	26.6071	25.9716
Lawrence et al. 2006	846D	13	6	73-74	124.03	138.63	119.297	0.920704	0.920704	26.5668	25.9325
Lawrence et al. 2006	846D	13	6	93-94	124.23	138.83	119.454	0.926119	0.926119	26.7309	26.0917
Lawrence et al. 2006	846D	13	6	103-104	124.33	138.93	119.531	0.926796	0.926796	26.7514	26.1117
Lawrence et al. 2006	846D	13	6	113-114	124.43	139.03	119.609	0.926797	0.926797	26.7514	26.1117
Lawrence et al. 2006	846D	13	6	133-134	124.63	139.23	119.766	0.931935	0.931935	26.9071	26.2628
Lawrence et al. 2006	846D	13	6	143-144	124.73	139.33	119.844	0.916367	0.916367	26.4354	25.8049
Lawrence et al. 2006	846D	13	7	3-4	124.83	139.43	119.922	0.914214	0.914214	26.3701	25.7416
Lawrence et al. 2006	846D	13	7	13-14	124.93	139.53	120	0.929538	0.929538	26.8345	26.1923
Lawrence et al. 2006	846C	13	5	43	122.93	139.43	120.027	0.924765	0.924765	26.6898	26.0519
Lawrence et al. 2006	846D	13	7	23-24	125.03	139.63	120.078	0.929245	0.929245	26.8256	26.1837
Lawrence et al. 2006	846C	13	5	53	123.03	139.53	120.105	0.913703	0.913703	26.3546	25.7265
Lawrence et al. 2006	846D	13	7	33-34	125.13	139.73	120.156	0.918558	0.918558	26.5018	25.8694
Lawrence et al. 2006	846D	13	7	43-44	125.23	139.83	120.233	0.906606	0.906606	26.1396	25.5178
Lawrence et al. 2006	846D	13	7	43-44	125.23	139.83	120.233	0.905373	0.905373	26.1022	25.4816
Lawrence et al. 2006	846C	13	5	73	123.23	139.73	120.26	0.889055	0.889055	25.6077	25.0016
Lawrence et al. 2006	846D	13	7	53-54	125.33	139.93	120.311	0.88113	0.88113	25.3676	24.7685
Lawrence et al. 2006	846D	13	7	53-54	125.33	139.93	120.311	0.882968	0.882968	25.4233	24.8226
Lawrence et al. 2006	846D	13	7	63-64	125.43	140.03	120.389	0.883405	0.883405	25.4365	24.8354
Lawrence et al. 2006	846D	13	7	73-74	125.53	140.13	120.468	0.887838	0.887838	25.5708	24.9658
Lawrence et al. 2006	846C	13	5	83	123.33	139.83	120.468	0.887642	0.887642	25.5649	24.9601
this study	846B	14	2	12	122.62	139.78	120.473	0.881138	0.887138	25.5496	24.9452
Lawrence et al. 2006	846C	13	5	93	123.43	139.93	120.563	0.925774	0.925774	26.7204	26.0816
this study	846B	14	2	22	122.72	139.88	120.568	0.89085	0.89685	25.8439	25.2309
Lawrence et al. 2006	846C	13	5	103	123.53	140.03	120.658	0.925964	0.925964	26.7262	26.0872
this study	846B	14	2	32	122.82	139.98	120.662	0.91291	0.91891	26.5124	25.8797
Lawrence et al. 2006	846C	13	5	113	123.63	140.13	120.753	0.929007	0.929007	26.8184	26.1767
this study	846B	14	2	42	122.92	140.08	120.757	0.922376	0.928376	26.7993	26.1581
Lawrence et al. 2006	846C	13	5	123	123.73	140.23	120.848	0.940089	0.940089	27.1542	26.5026
this study	846B	14	2	52	123.02	140.18	120.851	0.923955	0.929955	26.8471	26.2045
Lawrence et al. 2006	846C	13	5	133	123.83	140.33	120.944	0.930566	0.930566	26.8656	26.2225
this study	846B	14	2	63	123.13	140.29	120.945	0.936149	0.942149	27.2166	26.5632
this study	846B	14	2	72	123.22	140.38	121.023	0.932145	0.938145	27.0953	26.4454
Lawrence et al. 2006	846C	13	5	143	123.93	140.43	121.039	0.939112	0.939112	27.1246	26.4739
this study	846B	14	2	82	123.32	140.48	121.104	0.937155	0.943155	27.2471	26.5928
Lawrence et al. 2006	846C	13	6	3	124.03	140.53	121.134	0.930445	0.930445	26.862	26.219
this study	846B	14	2	92	123.42	140.58	121.182	0.931696	0.937696	27.0817	26.4322
Lawrence et al. 2006	846C	13	6	13	124.13	140.63	121.229	0.91995	0.91995	26.5439	25.9103
this study	846B	14	2	102	123.52	140.68	121.261	0.927115	0.933115	26.9429	26.2975
Lawrence et al. 2006	846C	13	6	23	124.23	140.73	121.324	0.917365	0.917365	26.4656	25.8343
this study	846B	14	2	112	123.62	140.78	121.339	0.921452	0.927452	26.7713	26.1309
this study	846B	14	2	122	123.72	140.88	121.418	0.92141	0.92741	26.77	26.1297
Lawrence et al. 2006	846C	13	6	33	124.33	140.83	121.42	0.915849	0.915849	26.4197	25.7897
this study	846B	14	2	132	123.82	140.98	121.496	0.923455	0.929455	26.832	26.1898
Lawrence et al. 2006	846C	13	6	43	124.43	140.93	121.515	0.924801	0.924801	26.6909	26.053
this study	846B	14	2	142	123.92	141.08	121.575	0.927153	0.933153	26.944	26.2986
Lawrence et al. 2006	846C	13	6	53	124.53	141.03	121.61	0.928982	0.928982	26.8176	26.1759
this study	846B	14	3	2	124.02	141.18	121.653	0.931595	0.937595	27.0786	26.4293
Lawrence et al. 2006	846C	13	6	63	124.63	141.13	121.705	0.914032	0.914032	26.3646	25.7362
this study	846B	14	3	12	124.12	141.28	121.732	0.916223	0.922223	26.6128	25.9772
Lawrence et al. 2006	846C	13	6	73	124.73	141.23	121.8	0.924678	0.924678	26.6872	26.0494
this study	846B	14	3	22	124.22	141.38	121.811	0.91765	0.92365	26.6561	26.0191
Lawrence et al. 2006	846C	13	6	83	124.83	141.33	121.896	0.930411	0.930411	26.861	26.218
this study	846B	14	3	32	124.32	141.48	121.897	0.932227	0.938227	27.0978	26.4478
this study	846B	14	3	42	124.42	141.58	121.982	0.9325	0.9385	27.106	26.4559
Lawrence et al. 2006	846C	13	6	93	124.93	141.43	121.991	0.936621	0.936621	27.0491	26.4006
this study	846B	14	3	52	124.52	141.68	122.07	0.93607	0.94207	27.2142	26.5609
Lawrence et al. 2006	846C	13	6	103	125.03	141.53	122.086	0.941497	0.941497	27.1969	26.544
this study	846B	14	3	62	124.62	141.78	122.156	0.926672	0.932672	26.9295	26.2845
Lawrence et al. 2006	846C	13	6	113	125.13	141.63	122.181	0.931507	0.931507	26.8941	26.2502
this study	846B	14	3	72	124.72	141.88	122.242	0.925858	0.931858	26.9048	26.2605
Lawrence et al. 2006	846C	13	6	123	125.23	141.73	122.276	0.923414	0.923414	26.6489	26.0122
this study	846B	14	3	82	124.82	141.98	122.328	0.912653	0.918653	26.5046	25.8721
Lawrence et al. 2006	846C	13	6	133	125.33	141.83	122.372	0.908805	0.908805	26.2062	25.5825
this study	846B	14	3	92	124.92	142.08	122.422	0.906632	0.912632	26.3222	25.695
Lawrence et al. 2006	846C	13	6	143	125.43	141.93	122.467	0.912148	0.912148	26.3075	25.6808
this study	846B	14	3	102	125.02	142.18	122.517	0.909964	0.915964	26.4232	25.7931
Lawrence et al. 2006	846C	13	7	3	125.53	142.03	122.562	0.916807	0.916807	26.4487	25.8179
Lawrence et al. 2006	846D	14	1	13-14	125.43	142.23	122.615	0.912784	0.912784	26.3268	25.6995
this study	846B	14	3	112	125.12	142.28	122.611	0.918681	0.924681	26.6873	26.0494
Lawrence et al. 2006	846C	13	7	13	125.63	142.13	122.657	0.912442	0.912442	26.3164	25.6895
this study	846B	14	3	122	125.22	142.38	122.707	0.91933	0.92533	26.707	26.0685
Lawrence et al. 2006	846C	13	7	23	125.73	142.23	122.752	0.917872	0.917872	26.481	25.8492
Lawrence et al. 2006	846D	14	1	23-24	127.73	142.33	122.77	0.913842	0.913842	26.3588	25.7306
Lawrence et al. 2006	846D	14	1	23-24	127.73	142.33	122.77	0.913997	0.913997	26.3635	25.7352
this study	846B	14	3	132	125.32	142.48	122.803	0.915504	0.921504	26.591	25.956
Lawrence et al. 2006	846C	13	7	33	125.83	142.33	122.848	0.900394	0.900394	25.9513	25.3351
Lawrence et al. 2006	846D	14	1	33-34	127.83	142.43	122.85	0.917281	0.917281	26.4631	25.8318
this study	846B	14	3	142	125.42	142.58	122.899	0.904468	0.910468	26.2566	25.6314
Lawrence et al. 2006	846D	14	1	43-44	127.93	142.53	122.932	0.910856	0.910856	26.2684	25.6428
Lawrence et al. 2006	846C	13	7	43	125.93	142.43	122.943	0.901053	0.901053	25.9713	25.3545
this study	846B	14	4	2	125.52	142.68	122.995	0.900872	0.906872	26.1476	25.5256
Lawrence et al. 2006	846D	14	1	53-54	128.03	142.63	123.018	0.90796	0.90796	26.1806	25.5576
this study	846B	14	4	12	125.62	142.78	123.092	0.912981	0.918981	26.5146	25.8818
Lawrence et al. 2006	846D	14	1	63-64	128.13	142.73	123.105	0.906523	0.906523	26.1371	25.5154
Lawrence et al. 2006	846D	14	1	63-64	128.13	142.73	123.105	0.90568	0.90568	26.1115	25.4906
this study	846B	14	4	22	125.72	142.88	123.189	0.920037	0.926037	26.7284	26.0893
Lawrence et al. 2006	846D	14	1	73-74	128.23	142.83	123.191	0.916518	0.916518	26.4399	25.8094
Lawrence et al. 2006	846D	14	1	83-84	128.33	142.93	123.278	0.927213	0.927213	26.764	26.1239
this study	846B	14	4	32	125.82	142.98	123.287	0.928432	0.934432	26.9828	26.3362
Lawrence et al. 2006	846D	14	1	93-94	128.43	143.03	123.365	0.92381	0.92381	26.6609	26.0238
this study	846B	14	4	42	125.92	143.08	123.384	0.918483	0.924483	26.6813	26.0436
Lawrence et al. 2006	846D	14	1	103-104	128.53	143.13	123.459	0.919914	0.919914	26.5429	25.9092
this study	846B	14	4	52	126.02	143.18	123.481	0.910808	0.916808	26.4487	25.8179
Lawrence et al. 2006	846D	14	1	113-114	128.63	143.23	123.552	0.90155	0.90155	25.9864	25.3691
this study	846B	14	4	62	126.12	143.28	123.578	0.909464	0.915464	26.408	25.7784
Lawrence et al. 2006	846D	14	1	123-124	128.73	143.33	123.646	0.900546	0.900546	25.956	25.3396
this study	846B	14	4	72	126.22	143.38	123.675	0.908058	0.914058	26.3654	25.737
Lawrence et al. 2006	846D	14	1	133-134	128.83	143.43	123.74	0.908199	0.908199	26.1878	25.5647
this study	846B	14	4	82	126.32	143.48	123.772	0.909383	0.915383	26.4055	25.776
Lawrence et al. 2006	846D	14	1	143-144	128.93	143.53	123.834	0.917759	0.917759	26.4776	25.8459
this study	846B	14	4	92	126.42	143.58	123.869	0.914823	0.920823	26.5704	25.936
Lawrence et al. 2006	846D	14	2	3-4	129.03	143.63	123.927	0.908451	0.908451	26.1955	25.5721
this study	846B	14	4	102	126.52	143.68	123.966	0.907579	0.913579	26.3509	25.7229
Lawrence et al. 2006	846D	14	2	13-14	129.13	143.73	124.021	0.916156	0.916156	26.429	25.7987
this study	846B	14	4	112	126.62	143.78	124.063	0.916473	0.922473	26.6204	25.9845
Lawrence et al. 2006	846D	14	2	23-24	129.23	143.83	124.115	0.918162	0.918162	26.4898	25.8577
this study	846B	14	4	122	126.72	143.88	124.16	0.925268	0.931268	26.8869	26.2432
Lawrence et al. 2006	846D	14	2	33-34	129.33	143.93	124.209	0.926411	0.926411	26.7397	26.1003
this study	846B	14	4	132	126.82	143.98	124.256	0.917404	0.923404	26.6486	26.0119
Lawrence et al. 2006	846D	14	2	43-44	129.43	144.03	124.303	0.918455	0.918455	26.4986	25.8663
this study	846B	14	4	142	126.92	144.08	124.353	0.917033	0.923033	26.6374	26.001
Lawrence et al. 2006	846D	14	2	53-54	129.53	144.13	124.398	0.920087	0.920087	26.5481	25.9143
this study	846B	14	5	2	127.02	144.18	124.45	0.912	0.918	26.4849	25.853
Lawrence et al. 2006	846D	14	2	63-64	129.63	144.23	124.495	0.899534	0.899534	25.9253	25.3098
this study	846B	14	5	12	127.12	144.28	124.548	0.890636	0.896636	25.8374	25.2246
Lawrence et al. 2006	846D	14	2	73-74	129.73	144.33	124.591	0.888321	0.888321	25.5855	24.98
this study	846B	14	5	22	127.22	144.38	124.645	0.880764	0.886764	25.5383	24.9342
Lawrence et al. 2006	846D	14	2	83-84	129.83	144.43	124.687	0.879706	0.879706	25.3244	24.7266
this study	846B	14	5	32	127.32	144.48	124.743	0.875899	0.881899	25.3909	24.7912
Lawrence et al. 2006	846D	14	2	93-94	129.93	144.53	124.783	0.879124	0.879124	25.3068	24.7095
this study	846B	14	5	42	127.42	144.58	124.841	0.884717	0.890717	25.6581	25.0505
Lawrence et al. 2006	846D	14	2	103-104	130.03	144.63	124.878	0.880731	0.880731	25.3555	24.7568
this study	846B	14	5	52	127.52	144.68	124.942	0.885279	0.891279	25.6751	25.067
Lawrence et al. 2006	846D	14	2	113-114	130.13	144.73	124.972	0.891196	0.891196	25.6726	25.0646
this study	846B	14	5	62	127.62	144.78	125.043	0.881811	0.887811	25.57	24.965
Lawrence et al. 2006	846D	14	2	123-124	130.23	144.83	125.066	0.912377	0.912377	26.3144	25.6875
Lawrence et al. 2006	846D	14	2	133-134	130.3	144.9	125.132	0.902536	0.902536	26.0162	25.3981
this study	846B	14	5	72	127.72	144.88	125.144	0.90306	0.90906	26.2139	25.59
this study	846B	14	5	82	127.82	144.98	125.244	0.921126	0.927126	26.7614	26.1213
Lawrence et al. 2006	846D	14	2	143-144	130.43	145.03	125.247	0.911828	0.911828	26.2978	25.6714
Lawrence et al. 2006	846D	14	3	3-4	130.53	145.13	125.326	0.922587	0.922587	26.6238	25.9878
this study	846B	14	5	92	127.92	145.08	125.344	0.925452	0.931452	26.8925	26.2486
Lawrence et al. 2006	846D	14	3	13-14	130.63	145.23	125.406	0.925531	0.925531	26.7131	26.0744
this study	846B	14	5	102	128.02	145.18	125.443	0.925793	0.931793	26.9028	26.2586
Lawrence et al. 2006	846D	14	3	23-24	130.73	145.33	125.486	0.924384	0.924384	26.6783	26.0407
this study	846B	14	5	112	128.12	145.28	125.542	0.922742	0.928742	26.8104	26.1689
Lawrence et al. 2006	846D	14	3	33-34	130.83	145.43	125.57	0.921306	0.921306	26.585	25.9502
Lawrence et al. 2006	846D	14	3	33-34	130.83	145.43	125.57	0.920629	0.920629	26.5645	25.9303
this study	846B	14	5	122	128.22	145.38	125.641	0.92045	0.92645	26.7409	26.1015
Lawrence et al. 2006	846D	14	3	43-44	130.93	145.53	125.656	0.919232	0.919232	26.5222	25.8892
this study	846B	14	5	132	128.32	145.48	125.739	0.912331	0.918331	26.4949	25.8627
Lawrence et al. 2006	846D	14	3	53-54	131.03	145.63	125.744	0.909851	0.909851	26.2379	25.6133
Lawrence et al. 2006	846D	14	3	63-64	131.13	145.73	125.838	0.917793	0.917793	26.4786	25.8468
this study	846B	14	5	142	128.42	145.58	125.838	0.907025	0.913025	26.3341	25.7066
Lawrence et al. 2006	846D	14	3	73-74	131.23	145.83	125.932	0.900016	0.900016	25.9399	25.324
this study	846B	14	6	2	128.52	145.68	125.936	0.903048	0.909048	26.2136	25.5896
Lawrence et al. 2006	846D	14	3	83-84	131.33	145.93	126.025	0.90558	0.90558	26.1085	25.4876
this study	846B	14	6	12	128.62	145.78	126.035	0.905066	0.911066	26.2747	25.649
Lawrence et al. 2006	846D	14	3	93-94	131.43	146.03	126.121	0.913073	0.913073	26.3355	25.708
this study	846B	14	6	22	128.72	145.88	126.134	0.919045	0.925045	26.6983	26.0602
Lawrence et al. 2006	846D	14	3	103-104	131.53	146.13	126.217	0.936128	0.936128	27.0342	26.3861
this study	846B	14	6	32	128.82	145.98	126.232	0.932655	0.938655	27.1107	26.4604
Lawrence et al. 2006	846D	14	3	113-114	131.63	146.23	126.313	0.94259	0.94259	27.23	26.5762
this study	846B	14	6	42	128.92	146.08	126.331	0.937903	0.943903	27.2698	26.6148
Lawrence et al. 2006	846D	14	3	123-124	131.73	146.33	126.411	0.949731	0.949731	27.4464	26.7862
Lawrence et al. 2006	846D	14	3	133-134	131.83	146.43	126.509	0.936012	0.936012	27.0307	26.3827
Lawrence et al. 2006	846D	14	4	3-4	132.03	146.63	126.703	0.939734	0.939734	27.1435	26.4922
Lawrence et al. 2006	846D	14	4	13-14	132.13	146.73	126.8	0.944814	0.944814	27.2974	26.6416
Lawrence et al. 2006	846D	14	4	23-24	132.23	146.83	126.898	0.943289	0.943289	27.2512	26.5967
Lawrence et al. 2006	846D	14	4	33-34	132.33	146.93	126.996	0.937728	0.937728	27.0827	26.4332
Lawrence et al. 2006	846D	14	4	43-44	132.43	147.03	127.093	0.931283	0.931283	26.8874	26.2436
Lawrence et al. 2006	846D	14	4	53-54	132.53	147.13	127.191	0.924604	0.924604	26.685	26.0472
Lawrence et al. 2006	846D	14	4	63-64	132.63	147.23	127.288	0.943589	0.943589	27.2603	26.6056
Lawrence et al. 2006	846D	14	4	73-74	132.73	147.33	127.385	0.95644	0.95644	27.6497	26.9835
Lawrence et al. 2006	846D	14	4	83-84	132.83	147.43	127.482	0.966015	0.966015	27.9398	27.2651
Lawrence et al. 2006	846D	14	4	93-94	132.93	147.53	127.58	0.959723	0.959723	27.7492	27.0801
Lawrence et al. 2006	846D	14	4	103-104	133.03	147.63	127.678	0.949114	0.949114	27.4277	26.7681
Lawrence et al. 2006	846D	14	4	113-114	133.13	147.73	127.775	0.94123	0.94123	27.1888	26.5362
Lawrence et al. 2006	846D	14	4	113-114	133.13	147.73	127.775	0.940362	0.940362	27.1625	26.5107
Lawrence et al. 2006	846D	14	4	123-124	133.23	147.83	127.873	0.951573	0.951573	27.5022	26.8404
Lawrence et al. 2006	846D	14	4	133-134	133.33	147.93	127.97	0.952818	0.952818	27.5399	26.877
Lawrence et al. 2006	846D	14	4	143-144	133.43	148.03	128.068	0.941036	0.941036	27.1829	26.5305
Lawrence et al. 2006	846D	14	5	3-4	133.53	148.13	128.166	0.925336	0.925336	26.7071	26.0687
Lawrence et al. 2006	846D	14	5	13-14	133.63	148.23	128.265	0.925356	0.925356	26.7078	26.0693
Lawrence et al. 2006	846D	14	5	23-24	133.73	148.33	128.364	0.925279	0.925279	26.7054	26.067
Lawrence et al. 2006	846D	14	5	33-34	133.83	148.43	128.466	0.932773	0.932773	26.9325	26.2874
Lawrence et al. 2006	846D	14	5	43-44	133.93	148.53	128.566	0.936917	0.936917	27.0581	26.4093
Lawrence et al. 2006	846D	14	5	53-54	134.03	148.63	128.667	0.943106	0.943106	27.2456	26.5913
Lawrence et al. 2006	846D	14	5	63-64	134.13	148.73	128.769	0.949011	0.949011	27.4246	26.765
Lawrence et al. 2006	846D	14	5	73-74	134.23	148.83	128.87	0.943506	0.943506	27.2578	26.6031
Lawrence et al. 2006	846D	14	5	73-74	134.23	148.83	128.87	0.940322	0.940322	27.1613	26.5095
Lawrence et al. 2006	846D	14	5	83-84	134.33	148.93	128.971	0.948956	0.948956	27.4229	26.7634
Lawrence et al. 2006	846D	14	5	93-94	134.43	149.03	129.072	0.946265	0.946265	27.3414	26.6843
Lawrence et al. 2006	846D	14	5	103-104	134.53	149.13	129.173	0.938932	0.938932	27.1192	26.4686
Lawrence et al. 2006	846D	14	5	113-114	134.63	149.23	129.274	0.946812	0.946812	27.3579	26.7004
Lawrence et al. 2006	846D	14	5	123-124	134.73	149.33	129.375	0.947203	0.947203	27.3698	26.7118
Lawrence et al. 2006	846D	14	5	133-134	134.83	149.43	129.476	0.95693	0.95693	27.6645	26.9979
Lawrence et al. 2006	846D	14	5	143-144	134.93	149.53	129.577	0.959174	0.959174	27.7325	27.0639
Lawrence et al. 2006	846D	14	6	3-4	135.03	149.63	129.678	0.962249	0.962249	27.8257	27.1544
Lawrence et al. 2006	846D	14	6	13-14	135.13	149.73	129.779	0.954568	0.954568	27.593	26.9285
Lawrence et al. 2006	846D	14	6	23-24	135.23	149.83	129.881	0.939669	0.939669	27.1415	26.4903
Lawrence et al. 2006	846D	14	6	33-34	135.33	149.93	129.982	0.952204	0.952204	27.5213	26.8589
Lawrence et al. 2006	846D	14	6	43-44	135.43	150.03	130.083	0.959393	0.959393	27.7392	27.0704
Lawrence et al. 2006	846D	14	6	43-44	135.43	150.03	130.083	0.958568	0.958568	27.7142	27.0461
Lawrence et al. 2006	846C	14	4	133	131.73	150.13	130.114	0.962795	0.962795	27.8423	27.1705
Lawrence et al. 2006	846D	14	6	53-54	135.53	150.13	130.184	0.967242	0.967242	27.977	27.3012
Lawrence et al. 2006	846C	14	4	143	131.83	150.23	130.215	0.961975	0.961975	27.8174	27.1463
Lawrence et al. 2006	846D	14	6	63-64	135.63	150.23	130.285	0.954773	0.954773	27.5992	26.9345
Lawrence et al. 2006	846C	14	5	3	131.93	150.33	130.316	0.949134	0.949134	27.4283	26.7687
Lawrence et al. 2006	846D	14	6	73-74	135.73	150.33	130.386	0.930554	0.930554	26.8653	26.2222
Lawrence et al. 2006	846C	14	5	13	132.03	150.43	130.417	0.934394	0.934394	26.9816	26.3351
Lawrence et al. 2006	846D	14	6	83-84	135.83	150.43	130.486	0.930068	0.930068	26.8506	26.2079
Lawrence et al. 2006	846C	14	5	13	132.13	150.53	130.517	0.934809	0.934809	26.9942	26.3473
Lawrence et al. 2006	846D	14	6	93-94	135.93	150.53	130.585	0.929831	0.929831	26.8434	26.2009
Lawrence et al. 2006	846C	14	5	23	132.23	150.63	130.616	0.926935	0.926935	26.7556	26.1157
Lawrence et al. 2006	846C	14	5	33	132.33	150.73	130.715	0.930153	0.930153	26.8531	26.2104
Lawrence et al. 2006	846C	14	5	43	132.43	150.83	130.811	0.940471	0.940471	27.1658	26.5139
Lawrence et al. 2006	846C	14	5	53	132.53	150.93	130.9	0.950569	0.950569	27.4718	26.8109
Lawrence et al. 2006	846C	14	5	63	132.63	151.03	130.989	0.958403	0.958403	27.7092	27.0413
Lawrence et al. 2006	846C	14	5	73	132.73	151.13	131.079	0.948655	0.948655	27.4138	26.7546
Lawrence et al. 2006	846C	14	5	83	132.83	151.23	131.168	0.924749	0.924749	26.6894	26.0515
Lawrence et al. 2006	846C	14	5	93	132.93	151.33	131.257	0.943969	0.943969	27.2718	26.6167
Lawrence et al. 2006	846C	14	5	103	133.03	151.43	131.347	0.944599	0.944599	27.2909	26.6353
Lawrence et al. 2006	846C	14	5	113	133.13	151.53	131.436	0.939286	0.939286	27.1299	26.479
Lawrence et al. 2006	846C	14	5	123	133.23	151.63	131.525	0.9268	0.9268	26.7515	26.1118
Lawrence et al. 2006	846C	14	5	133	133.33	151.73	131.615	0.909184	0.909184	26.2177	25.5937
Lawrence et al. 2006	846C	14	5	143	133.43	151.83	131.704	0.910845	0.910845	26.268	25.6425
Lawrence et al. 2006	846C	14	6	3	133.53	151.93	131.793	0.926956	0.926956	26.7562	26.1163
Lawrence et al. 2006	846C	14	6	13	133.63	152.03	131.883	0.932293	0.932293	26.918	26.2733
Lawrence et al. 2006	846C	14	6	23	133.73	152.13	131.972	0.938912	0.938912	27.1185	26.468
Lawrence et al. 2006	846C	14	6	33	133.83	152.23	132.062	0.939075	0.939075	27.1235	26.4728
Lawrence et al. 2006	846C	14	6	43	133.93	152.33	132.151	0.9555	0.9555	27.6212	26.9559
Lawrence et al. 2006	846C	14	6	53	134.03	152.43	132.24	0.945143	0.945143	27.3074	26.6513
Lawrence et al. 2006	846C	14	6	63	134.13	152.53	132.33	0.936245	0.936245	27.0377	26.3896
Lawrence et al. 2006	846D	15	1	3-4	134.83	152.83	132.331	0.938599	0.938599	27.1091	26.4588
Lawrence et al. 2006	846D	15	1	3-4	134.83	152.83	132.331	0.939247	0.939247	27.1287	26.4778
Lawrence et al. 2006	846C	14	6	73	134.23	152.63	132.397	0.934669	0.934669	26.99	26.3432
Lawrence et al. 2006	846D	15	1	13-14	134.93	152.93	132.418	0.941274	0.941274	27.1901	26.5375
Lawrence et al. 2006	846D	15	1	13-14	134.93	152.93	132.418	0.942572	0.942572	27.2294	26.5756
Lawrence et al. 2006	846C	14	6	83	134.33	152.73	132.465	0.945906	0.945906	27.3305	26.6737
Lawrence et al. 2006	846D	15	1	23-24	135.03	153.03	132.504	0.941919	0.941919	27.2097	26.5565
Lawrence et al. 2006	846D	15	1	23-24	135.03	153.03	132.504	0.94159	0.94159	27.1997	26.5468
Lawrence et al. 2006	846D	15	1	23-24	135.03	153.03	132.504	0.941634	0.941634	27.201	26.5481
Lawrence et al. 2006	846C	14	6	93	134.43	152.83	132.532	0.942952	0.942952	27.241	26.5868
Lawrence et al. 2006	846D	15	1	33-34	135.13	153.13	132.588	0.94433	0.94433	27.2827	26.6273
Lawrence et al. 2006	846D	15	1	33-34	135.13	153.13	132.588	0.943581	0.943581	27.26	26.6053
Lawrence et al. 2006	846C	14	6	103	134.53	152.93	132.6	0.926046	0.926046	26.7287	26.0896
Lawrence et al. 2006	846D	15	1	43-44	135.23	153.23	132.668	0.925471	0.925471	26.7113	26.0727
Lawrence et al. 2006	846D	15	1	43-44	135.23	153.23	132.668	0.92514	0.92514	26.7012	26.0629
Lawrence et al. 2006	846D	15	1	53-54	135.33	153.33	132.748	0.921331	0.921331	26.5858	25.9509
Lawrence et al. 2006	846D	15	1	53-54	135.33	153.33	132.748	0.921227	0.921227	26.5826	25.9479
Lawrence et al. 2006	846D	15	1	53-54	135.33	153.33	132.748	0.921158	0.921158	26.5805	25.9458
Lawrence et al. 2006	846D	15	1	63-34	135.43	153.43	132.828	0.913081	0.913081	26.3358	25.7083
Lawrence et al. 2006	846D	15	1	73-74	135.53	153.53	132.912	0.948345	0.948345	27.4044	26.7455
Lawrence et al. 2006	846D	15	1	73-74	135.53	153.53	132.912	0.946665	0.946665	27.3535	26.696
Lawrence et al. 2006	846D	15	1	83-84	135.63	153.63	132.999	0.952462	0.952462	27.5291	26.8665
Lawrence et al. 2006	846D	15	1	83-84	135.63	153.63	132.999	0.952193	0.952193	27.521	26.8586
Lawrence et al. 2006	846D	15	1	93-94	135.73	153.73	133.085	0.945745	0.945745	27.3256	26.669
Lawrence et al. 2006	846D	15	1	103-104	135.83	153.83	133.172	0.95493	0.95493	27.6039	26.9391
Lawrence et al. 2006	846D	15	1	113-114	135.93	153.93	133.259	0.942381	0.942381	27.2237	26.57
Lawrence et al. 2006	846D	15	1	123-124	136.03	154.03	133.345	0.933255	0.933255	26.9471	26.3016
Lawrence et al. 2006	846D	15	1	133-134	136.13	154.13	133.434	0.932044	0.932044	26.9104	26.266
Lawrence et al. 2006	846D	15	1	143-144	136.23	154.23	133.527	0.941459	0.941459	27.1957	26.5429
Lawrence et al. 2006	846D	15	2	3-4	136.33	154.33	133.621	0.938726	0.938726	27.1129	26.4625
Lawrence et al. 2006	846D	15	2	13-14	136.43	154.43	133.715	0.939125	0.939125	27.125	26.4743
Lawrence et al. 2006	846D	15	2	23-24	136.53	154.53	133.809	0.929577	0.929577	26.8357	26.1934
Lawrence et al. 2006	846D	15	2	33-34	136.63	154.63	133.903	0.929781	0.929781	26.8419	26.1995
Lawrence et al. 2006	846D	15	2	43-44	136.73	154.73	133.997	0.935295	0.935295	27.0089	26.3616
Lawrence et al. 2006	846D	15	2	53-54	136.83	154.83	134.089	0.937009	0.937009	27.0609	26.412
Lawrence et al. 2006	846D	15	2	63-64	136.93	154.93	134.175	0.932416	0.932416	26.9217	26.2769
Lawrence et al. 2006	846D	15	2	73-74	137.03	155.03	134.254	0.930001	0.930001	26.8485	26.2059
Lawrence et al. 2006	846D	15	2	83-84	137.13	155.13	134.334	0.92517	0.92517	26.7021	26.0638
Lawrence et al. 2006	846D	15	2	93-94	137.23	155.23	134.414	0.922949	0.922949	26.6348	25.9985
Lawrence et al. 2006	846D	15	2	103-104	137.33	155.33	134.494	0.910687	0.910687	26.2632	25.6378
Lawrence et al. 2006	846D	15	2	113-114	137.43	155.43	134.574	0.906935	0.906935	26.1496	25.5275
Lawrence et al. 2006	846D	15	2	123-124	137.53	155.53	134.655	0.903776	0.903776	26.0538	25.4346
Lawrence et al. 2006	846D	15	2	133-134	137.63	155.63	134.735	0.899881	0.899881	25.9358	25.32
Lawrence et al. 2006	846D	15	2	143-144	137.73	155.73	134.815	0.902784	0.902784	26.0237	25.4054
Lawrence et al. 2006	846D	15	3	3-4	137.83	155.83	134.895	0.903911	0.903911	26.0579	25.4385
Lawrence et al. 2006	846D	15	3	3-4	137.83	155.83	134.895	0.904503	0.904503	26.0758	25.456
Lawrence et al. 2006	846D	15	3	13-14	137.93	155.93	134.975	0.913854	0.913854	26.3592	25.731
Lawrence et al. 2006	846D	15	3	23-24	138.03	156.03	135.054	0.912719	0.912719	26.3248	25.6976
Lawrence et al. 2006	846D	15	3	33-34	138.13	156.13	135.134	0.905351	0.905351	26.1015	25.4809
Lawrence et al. 2006	846D	15	3	43-44	138.23	156.23	135.214	0.914012	0.914012	26.364	25.7357
Lawrence et al. 2006	846D	15	3	53-54	138.33	156.33	135.294	0.91793	0.91793	26.4827	25.8509
Lawrence et al. 2006	846D	15	3	63-64	138.43	156.43	135.374	0.908027	0.908027	26.1826	25.5596
Lawrence et al. 2006	846D	15	3	73-74	138.53	156.53	135.454	0.917184	0.917184	26.4601	25.8289
Lawrence et al. 2006	846D	15	3	83-84	138.63	156.63	135.534	0.928383	0.928383	26.7995	26.1583
Lawrence et al. 2006	846D	15	3	93-94	138.73	156.73	135.614	0.934397	0.934397	26.9817	26.3352
Lawrence et al. 2006	846D	15	3	103-104	138.83	156.83	135.695	0.944296	0.944296	27.2817	26.6264
Lawrence et al. 2006	846D	15	3	113-114	138.93	156.93	135.782	0.93898	0.93898	27.1206	26.47
Lawrence et al. 2006	846D	15	3	123-124	139.03	157.03	135.869	0.924278	0.924278	26.6751	26.0376
Lawrence et al. 2006	846D	15	3	123-124	139.03	157.03	135.869	0.924782	0.924782	26.6904	26.0524
Lawrence et al. 2006	846D	15	3	123-124	139.03	157.03	135.869	0.929964	0.929964	26.8474	26.2048
Lawrence et al. 2006	846D	15	3	123-124	139.03	157.03	135.869	0.924845	0.924845	26.6923	26.0543
Lawrence et al. 2006	846D	15	3	133-134	139.13	157.13	135.955	0.92119	0.92119	26.5815	25.9468
Lawrence et al. 2006	846D	15	3	143-144	139.23	157.23	136.045	0.926508	0.926508	26.7427	26.1032
Lawrence et al. 2006	846D	15	4	3-4	139.33	157.33	136.139	0.933903	0.933903	26.9668	26.3207
Lawrence et al. 2006	846D	15	4	13-14	139.43	157.43	136.233	0.932941	0.932941	26.9376	26.2924
Lawrence et al. 2006	846D	15	4	23-24	139.53	157.53	136.327	0.933873	0.933873	26.9658	26.3198
Lawrence et al. 2006	846D	15	4	33-34	139.63	157.63	136.411	0.926305	0.926305	26.7365	26.0972
Lawrence et al. 2006	846D	15	4	43-44	139.73	157.73	136.492	0.923667	0.923667	26.6566	26.0196
Lawrence et al. 2006	846D	15	4	53-54	139.83	157.83	136.572	0.922062	0.922062	26.6079	25.9724
Lawrence et al. 2006	846D	15	4	63-64	139.93	157.93	136.652	0.931653	0.931653	26.8986	26.2545
Lawrence et al. 2006	846D	15	4	73-74	140.03	158.03	136.732	0.918861	0.918861	26.5109	25.8783
Lawrence et al. 2006	846D	15	4	83-84	140.13	158.13	136.812	0.932547	0.932547	26.9257	26.2808
Lawrence et al. 2006	846D	15	4	93-94	140.23	158.23	136.892	0.941543	0.941543	27.1983	26.5454
Lawrence et al. 2006	846D	15	4	103-104	140.33	158.33	136.972	0.945136	0.945136	27.3071	26.651
Lawrence et al. 2006	846D	15	4	113-114	140.43	158.43	137.056	0.940291	0.940291	27.1603	26.5086
Lawrence et al. 2006	846D	15	4	123-124	140.53	158.53	137.143	0.941035	0.941035	27.1829	26.5304
Lawrence et al. 2006	846D	15	4	133-134	140.63	158.63	137.228	0.934863	0.934863	26.9959	26.3489
Lawrence et al. 2006	846D	15	4	143-144	140.73	158.73	137.308	0.938357	0.938357	27.1017	26.4517
Lawrence et al. 2006	846D	15	5	3-4	140.83	158.83	137.388	0.936858	0.936858	27.0563	26.4076
Lawrence et al. 2006	846D	15	5	13-14	140.93	158.93	137.469	0.943041	0.943041	27.2437	26.5894
Lawrence et al. 2006	846D	15	5	23-24	141.03	159.03	137.551	0.94324	0.94324	27.2497	26.5953
Lawrence et al. 2006	846D	15	5	23-24	141.03	159.03	137.551	0.948771	0.948771	27.4173	26.758
Lawrence et al. 2006	846D	15	5	33-34	141.13	159.13	137.638	0.937365	0.937365	27.0717	26.4225
Lawrence et al. 2006	846D	15	5	43-44	141.23	159.23	137.724	0.929487	0.929487	26.8329	26.1908
Lawrence et al. 2006	846D	15	5	53-54	141.33	159.33	137.811	0.932475	0.932475	26.9235	26.2787
Lawrence et al. 2006	846D	15	5	63-64	141.43	159.43	137.897	0.948684	0.948684	27.4147	26.7554
Lawrence et al. 2006	846D	15	5	73-74	141.53	159.53	137.984	0.957145	0.957145	27.671	27.0043
Lawrence et al. 2006	846D	15	5	83-84	141.63	159.63	138.071	0.957633	0.957633	27.6858	27.0186
Lawrence et al. 2006	846D	15	5	93-94	141.73	159.73	138.158	0.940606	0.940606	27.1699	26.5178
Lawrence et al. 2006	846D	15	5	103-104	141.83	159.83	138.252	0.934184	0.934184	26.9753	26.329
Lawrence et al. 2006	846D	15	5	103-104	141.83	159.83	138.252	0.933466	0.933466	26.9535	26.3078
Lawrence et al. 2006	846D	15	5	113-114	141.93	159.93	138.346	0.939323	0.939323	27.131	26.4801
Lawrence et al. 2006	846D	15	5	123-124	142.03	160.03	138.44	0.947172	0.947172	27.3689	26.711
Lawrence et al. 2006	846D	15	5	133-134	142.13	160.13	138.534	0.955037	0.955037	27.6072	26.9423
Lawrence et al. 2006	846D	15	5	143-144	142.23	160.23	138.628	0.947921	0.947921	27.3915	26.733
Lawrence et al. 2006	846D	15	6	3-4	142.33	160.33	138.721	0.938122	0.938122	27.0946	26.4448
Lawrence et al. 2006	846D	15	6	13-14	142.43	160.43	138.815	0.941958	0.941958	27.2108	26.5576
Lawrence et al. 2006	846D	15	6	23-24	142.53	160.53	138.909	0.94564	0.94564	27.3224	26.6659
Lawrence et al. 2006	846D	15	6	33-34	142.63	160.63	139.003	0.94501	0.94501	27.3033	26.6474
Lawrence et al. 2006	846D	15	6	43-44	142.73	160.73	139.096	0.937823	0.937823	27.0855	26.436
Lawrence et al. 2006	846D	15	6	53-54	142.83	160.83	139.19	0.934151	0.934151	26.9743	26.328
Lawrence et al. 2006	846D	15	6	53-54	142.83	160.83	139.19	0.935272	0.935272	27.0082	26.3609
Lawrence et al. 2006	846D	15	6	63-64	142.93	160.93	139.284	0.932401	0.932401	26.9212	26.2765
Lawrence et al. 2006	846D	15	6	73-74	143.03	161.03	139.378	0.946432	0.946432	27.3464	26.6892
Lawrence et al. 2006	846D	15	6	83-84	143.13	161.13	139.471	0.950141	0.950141	27.4588	26.7983
Lawrence et al. 2006	846D	15	6	93-94	143.23	161.23	139.552	0.957327	0.957327	27.6766	27.0096
Lawrence et al. 2006	846D	15	6	103-104	143.33	161.33	139.632	0.952423	0.952423	27.528	26.8654
Lawrence et al. 2006	846D	15	6	113-114	143.43	161.43	139.711	0.947901	0.947901	27.3909	26.7324
Lawence	846B	16	2	23	141.73	161.94	139.791	0.938523	0.938523	27.1068	26.4566
Lawrence et al. 2006	846D	15	6	123-124	143.53	161.53	139.791	0.938507	0.938507	27.1063	26.4561
Lawrence et al. 2006	846D	15	6	133-134	143.63	161.63	139.871	0.94371	0.94371	27.2639	26.6091
Lawence	846B	16	2	33	141.83	162.04	139.887	0.946787	0.946787	27.3572	26.6996
Lawrence et al. 2006	846D	15	6	143-144	143.73	161.73	139.951	0.951724	0.951724	27.5068	26.8448
Lawence	846B	16	2	43	141.93	162.14	139.983	0.956545	0.956545	27.6529	26.9866
Lawrence et al. 2006	846D	15	7	3-4	143.83	161.83	140.031	0.956176	0.956176	27.6417	26.9758
Lawence	846B	16	2	53	142.03	162.24	140.079	0.95236	0.95236	27.526	26.8635
Lawrence et al. 2006	846D	15	7	13-14	143.93	161.93	140.111	0.943457	0.943457	27.2563	26.6017
Lawrence et al. 2006	846D	15	7	23-24	143.93	161.93	140.111	0.937285	0.937285	27.0692	26.4201
Lawence	846B	16	2	63	142.13	162.34	140.175	0.941026	0.941026	27.1826	26.5302
Lawrence et al. 2006	846D	15	7	23-24	144.03	162.03	140.191	0.938009	0.938009	27.0912	26.4414
Lawence	846B	16	2	73	142.23	162.44	140.271	0.93393	0.93393	26.9676	26.3215
Lawrence et al. 2006	846D	15	7	33-34	144.13	162.13	140.271	0.930854	0.930854	26.8744	26.231
Lawrence et al. 2006	846D	15	7	43-44	144.23	162.23	140.352	0.945023	0.945023	27.3037	26.6477
Lawence	846B	16	2	83	142.33	162.54	140.372	0.937411	0.937411	27.0731	26.4239
Lawrence et al. 2006	846D	15	7	53-54	144.33	162.33	140.432	0.953436	0.953436	27.5587	26.8952
Lawence	846B	16	2	93	142.43	162.64	140.472	0.948478	0.948478	27.4084	26.7494
Lawrence et al. 2006	846D	15	7	63-64	144.43	162.43	140.512	0.960075	0.960075	27.7599	27.0905
Lawence	846B	16	2	103	142.53	162.74	140.572	0.964614	0.964614	27.8974	27.224
Lawrence et al. 2006	846D	15	7	73-74	144.53	162.53	140.592	0.957039	0.957039	27.6679	27.0012
Lawence	846B	16	2	113	142.63	162.84	140.672	0.964835	0.964835	27.9041	27.2304
Lawence	846B	16	2	113	142.63	162.84	140.672	0.965011	0.965011	27.9094	27.2356
Lawrence et al. 2006	846D	15	7	83-84	144.63	162.63	140.672	0.965549	0.965549	27.9257	27.2514
Lawence	846B	16	2	123	142.73	162.94	140.757	0.95929	0.95929	27.7361	27.0674
Lawence	846B	16	2	133	142.83	163.04	140.842	0.958427	0.958427	27.7099	27.042
Lawence	846B	16	2	143	142.93	163.14	140.927	0.951996	0.951996	27.515	26.8528
Lawence	846B	16	3	3	143.03	163.24	141.013	0.944364	0.944364	27.2837	26.6283
Lawence	846B	16	3	13	143.13	163.34	141.11	0.948008	0.948008	27.3942	26.7355
Lawence	846B	16	3	23	143.23	163.44	141.197	0.942198	0.942198	27.2181	26.5646
Lawence	846B	16	3	33	143.33	163.54	141.285	0.945769	0.945769	27.3263	26.6697
Lawence	846B	16	3	43	143.43	163.64	141.372	0.960619	0.960619	27.7763	27.1065
Lawence	846B	16	3	53	143.53	163.74	141.46	0.96625	0.96625	27.947	27.2721
Lawence	846B	16	3	53	143.53	163.74	141.46	0.965839	0.965839	27.9345	27.26
Lawrence et al. 2006	846D	16	1	3-4	144.33	164.33	141.498	0.962223	0.962223	27.8249	27.1536
Lawence	846B	16	3	63	143.63	163.84	141.547	0.959434	0.959434	27.7404	27.0716
Lawrence et al. 2006	846D	16	1	13-14	144.43	164.43	141.622	0.940553	0.940553	27.1683	26.5163
Lawence	846B	16	3	73	143.73	163.94	141.635	0.956736	0.956736	27.6587	26.9922
Lawence	846B	16	3	83	143.83	164.04	141.723	0.954903	0.954903	27.6031	26.9383
Lawrence et al. 2006	846D	16	1	23-24	144.53	164.53	141.745	0.962124	0.962124	27.8219	27.1507
Lawence	846B	16	3	93	143.93	164.14	141.779	0.962246	0.962246	27.8256	27.1543
Lawrence et al. 2006	846D	16	1	33-34	144.63	164.63	141.86	0.963069	0.963069	27.8506	27.1785
Lawence	846B	16	3	103	144.03	164.24	141.898	0.967809	0.967809	27.9942	27.3179
Lawrence et al. 2006	846D	16	1	43-44	144.73	164.73	141.968	0.97123	0.97123	28.0979	27.4185
Lawence	846B	16	3	113	144.13	164.34	141.985	0.964088	0.964088	27.8814	27.2085
Lawence	846B	16	3	123	144.23	164.44	142.073	0.963898	0.963898	27.8757	27.2029
Lawrence et al. 2006	846D	16	1	53-54	144.83	164.83	142.073	0.973643	0.973643	28.171	27.4895
Lawence	846B	16	4	13	144.63	164.84	142.126	0.975003	0.975003	28.2122	27.5295
Lawence	846B	16	4	13	144.63	164.84	142.126	0.973484	0.973484	28.1662	27.4848
Lawence	846B	16	3	133	144.33	164.54	142.16	0.969684	0.969684	28.051	27.3731
Lawrence et al. 2006	846D	16	1	63-64	144.93	164.93	142.176	0.973601	0.973601	28.1697	27.4883
Lawence	846B	16	3	143	144.43	164.64	142.248	0.972957	0.972957	28.1502	27.4693
Lawence	846B	16	3	23	144.73	164.94	142.275	0.976068	0.976068	28.2445	27.5608
Lawrence et al. 2006	846D	16	1	73-74	145.03	165.03	142.277	0.974011	0.974011	28.1822	27.5003
Lawence	846B	16	4	3	144.53	164.74	142.335	0.972297	0.972297	28.1302	27.4499
Lawrence et al. 2006	846D	16	1	83-84	145.13	165.13	142.376	0.973553	0.973553	28.1683	27.4869
Lawence	846B	16	4	33	144.83	165.04	142.424	0.975235	0.975235	28.2192	27.5363
Lawrence et al. 2006	846D	16	1	93-94	145.23	165.23	142.475	0.978785	0.978785	28.3268	27.6407
Lawrence et al. 2006	846D	16	1	103-104	145.33	165.33	142.573	0.978183	0.978183	28.3086	27.623
Lawence	846B	16	4	43	144.93	165.14	142.574	0.978654	0.978654	28.3229	27.6369
Lawrence et al. 2006	846D	16	1	113-114	145.43	165.43	142.671	0.980938	0.980938	28.3921	27.7041
Lawence	846B	16	4	53	145.03	165.24	142.723	0.979516	0.979516	28.349	27.6622
Lawrence et al. 2006	846D	16	1	123-124	145.53	165.53	142.767	0.975015	0.975015	28.2126	27.5298
Lawrence et al. 2006	846D	16	1	133-134	145.63	165.63	142.86	0.970496	0.970496	28.0756	27.3969
Lawrence et al. 2006	846D	16	1	143-144	145.73	165.73	142.954	0.966366	0.966366	27.9505	27.2755
Lawrence et al. 2006	846D	16	2	3-4	145.83	165.83	143.048	0.970983	0.970983	28.0904	27.4113
Lawrence et al. 2006	846D	16	2	13-14	145.93	165.93	143.136	0.974587	0.974587	28.1996	27.5173
Lawrence et al. 2006	846D	16	2	13-14	145.93	165.93	143.136	0.975333	0.975333	28.2222	27.5392
Lawrence et al. 2006	846D	16	2	23-24	146.03	166.03	143.222	0.979741	0.979741	28.3558	27.6689
Lawrence et al. 2006	846D	16	2	33-34	146.13	166.13	143.309	0.979523	0.979523	28.3492	27.6624
Lawrence et al. 2006	846D	16	2	43-44	146.23	166.23	143.395	0.97849	0.97849	28.3179	27.6321
Lawrence et al. 2006	846D	16	2	53-54	146.33	166.33	143.482	0.969693	0.969693	28.0513	27.3733
Lawrence et al. 2006	846D	16	2	63-64	146.43	166.43	143.569	0.971126	0.971126	28.0947	27.4155
Lawrence et al. 2006	846D	16	2	73-74	146.53	166.53	143.655	0.975427	0.975427	28.2251	27.542
Lawrence et al. 2006	846D	16	2	83-84	146.63	166.63	143.742	0.976129	0.976129	28.2463	27.5626
Lawrence et al. 2006	846D	16	2	93-94	146.73	166.73	143.825	0.96689	0.96689	27.9664	27.2909
Lawrence et al. 2006	846D	16	2	103-104	146.83	166.83	143.905	0.952319	0.952319	27.5248	26.8623
Lawrence et al. 2006	846D	16	2	113-114	146.93	166.93	143.985	0.963634	0.963634	27.8677	27.1951
Lawrence et al. 2006	846D	16	2	123-124	147.03	167.03	144.066	0.971009	0.971009	28.0912	27.412
Lawrence et al. 2006	846D	16	2	123-124	147.03	167.03	144.066	0.97022	0.97022	28.0673	27.3888
Lawrence et al. 2006	846D	16	2	133-134	147.13	167.13	144.146	0.970307	0.970307	28.0699	27.3914
Lawrence et al. 2006	846D	16	2	143-144	147.23	167.23	144.226	0.969364	0.969364	28.0413	27.3637
Lawrence et al. 2006	846D	16	3	3-4	147.33	167.33	144.306	0.959593	0.959593	27.7452	27.0763
Lawrence et al. 2006	846D	16	3	13-14	147.43	167.43	144.386	0.956384	0.956384	27.648	26.9819
Lawrence et al. 2006	846D	16	3	23-24	147.53	167.53	144.466	0.957671	0.957671	27.687	27.0197
Lawrence et al. 2006	846D	16	3	33-34	147.63	167.63	144.546	0.956752	0.956752	27.6592	26.9927
Lawrence et al. 2006	846D	16	3	43-44	147.73	167.73	144.626	0.961767	0.961767	27.8111	27.1402
Lawrence et al. 2006	846D	16	3	53-54	147.83	167.83	144.706	0.968445	0.968445	28.0135	27.3366
Lawrence et al. 2006	846D	16	3	63-64	147.93	167.93	144.785	0.970649	0.970649	28.0803	27.4014
Lawrence et al. 2006	846D	16	3	73-74	148.03	168.03	144.865	0.970334	0.970334	28.0707	27.3922
Lawrence et al. 2006	846D	16	3	83-84	148.13	168.13	144.945	0.969343	0.969343	28.0407	27.363
Lawrence et al. 2006	846D	16	3	93-94	148.23	168.23	145.025	0.968667	0.968667	28.0202	27.3431
Lawrence et al. 2006	846D	16	3	103-104	148.33	168.33	145.105	0.969214	0.969214	28.0368	27.3592
Lawrence et al. 2006	846D	16	3	113-114	148.43	168.43	145.185	0.963928	0.963928	27.8766	27.2038
Lawrence et al. 2006	846D	16	3	123-124	148.53	168.53	145.265	0.958733	0.958733	27.7192	27.051
Lawrence et al. 2006	846D	16	3	133-134	148.63	168.63	145.351	0.951544	0.951544	27.5013	26.8395
Lawrence et al. 2006	846D	16	3	143-144	148.73	168.73	145.445	0.951413	0.951413	27.4974	26.8357
Lawrence et al. 2006	846D	16	4	3-4	148.83	168.83	145.539	0.951833	0.951833	27.5101	26.848
Lawrence et al. 2006	846D	16	4	13-14	148.93	168.93	145.632	0.955131	0.955131	27.61	26.945
Lawrence et al. 2006	846D	16	4	23-24	149.03	169.03	145.728	0.956814	0.956814	27.661	26.9945
Lawrence et al. 2006	846D	16	4	33-34	149.13	169.13	145.824	0.959034	0.959034	27.7283	27.0598
Lawrence et al. 2006	846D	16	4	43-44	149.23	169.23	145.92	0.959486	0.959486	27.742	27.0731
Lawrence et al. 2006	846D	16	4	43-44	149.23	169.23	145.92	0.959503	0.959503	27.7425	27.0736
Lawrence et al. 2006	846D	16	4	53-54	149.33	169.33	146.017	0.952936	0.952936	27.5435	26.8805
Lawrence et al. 2006	846D	16	4	63-64	149.43	169.43	146.114	0.95649	0.95649	27.6512	26.985
Lawrence et al. 2006	846D	16	4	73-74	149.53	169.53	146.209	0.959225	0.959225	27.7341	27.0654
Lawrence et al. 2006	846D	16	4	83-84	149.63	169.63	146.302	0.956878	0.956878	27.663	26.9964
Lawrence et al. 2006	846D	16	4	93-94	149.73	169.73	146.396	0.950812	0.950812	27.4792	26.818
Lawrence et al. 2006	846D	16	4	103-104	149.83	169.83	146.49	0.945473	0.945473	27.3174	26.661
Lawrence et al. 2006	846D	16	4	113-114	149.93	169.93	146.583	0.923535	0.923535	26.6526	26.0157
Lawrence et al. 2006	846D	16	4	123-124	150.03	170.03	146.677	0.937023	0.937023	27.0613	26.4124
Lawrence et al. 2006	846D	16	4	133-134	150.13	170.13	146.771	0.942894	0.942894	27.2392	26.5851
Lawrence et al. 2006	846D	16	4	143-144	150.23	170.23	146.861	0.943213	0.943213	27.2489	26.5945
Lawrence et al. 2006	846D	16	5	3-4	150.33	170.33	146.947	0.94736	0.94736	27.3745	26.7165
Lawrence et al. 2006	846D	16	5	13-14	150.43	170.43	147.034	0.944057	0.944057	27.2745	26.6193
Lawrence et al. 2006	846D	16	5	23-24	150.53	170.53	147.121	0.935903	0.935903	27.0274	26.3795
Lawrence et al. 2006	846D	16	5	33-34	150.63	170.63	147.207	0.928272	0.928272	26.7961	26.1551
Lawrence et al. 2006	846D	16	5	43-44	150.73	170.73	147.294	0.930287	0.930287	26.8572	26.2143
Lawrence et al. 2006	846D	16	5	53-54	150.83	170.83	147.381	0.927094	0.927094	26.7604	26.1204
Lawrence et al. 2006	846D	16	5	63-64	150.93	170.93	147.467	0.923363	0.923363	26.6474	26.0107
Lawrence et al. 2006	846D	16	5	73-74	151.03	171.03	147.549	0.919837	0.919837	26.5405	25.907
Lawrence et al. 2006	846D	16	5	83-84	151.13	171.13	147.629	0.919231	0.919231	26.5222	25.8892
Lawrence et al. 2006	846D	16	5	93-94	151.23	171.23	147.709	0.912421	0.912421	26.3158	25.6889
Lawrence et al. 2006	846D	16	5	103-104	151.33	171.33	147.789	0.917204	0.917204	26.4607	25.8295
Lawrence et al. 2006	846D	16	5	113-114	151.43	171.43	147.869	0.918379	0.918379	26.4963	25.8641
Lawrence et al. 2006	846D	16	5	123-124	151.53	171.53	147.949	0.936303	0.936303	27.0395	26.3913
Lawrence et al. 2006	846D	16	5	123-124	151.53	171.53	147.949	0.934248	0.934248	26.9772	26.3308
Lawrence et al. 2006	846D	16	5	133-134	151.63	171.63	148.029	0.940727	0.940727	27.1735	26.5214
Lawrence et al. 2006	846D	16	5	143-144	151.73	171.73	148.109	0.943732	0.943732	27.2646	26.6098
Lawrence et al. 2006	846D	16	6	3-4	151.83	171.83	148.189	0.952435	0.952435	27.5283	26.8657
Lawrence et al. 2006	846D	16	6	13-14	151.93	171.93	148.269	0.948293	0.948293	27.4028	26.7439
Lawrence et al. 2006	846D	16	6	23-24	152.03	172.03	148.349	0.948438	0.948438	27.4072	26.7482
Lawrence et al. 2006	846D	16	6	33-34	152.13	172.13	148.429	0.931772	0.931772	26.9022	26.258
Lawrence et al. 2006	846D	16	6	43-44	152.23	172.23	148.509	0.932895	0.932895	26.9362	26.291
Lawrence et al. 2006	846D	16	6	53-54	152.33	172.33	148.589	0.930029	0.930029	26.8494	26.2067
Lawrence et al. 2006	846D	16	6	63-64	152.43	172.43	148.669	0.930292	0.930292	26.8573	26.2145
Lawrence et al. 2006	846D	16	6	73-74	152.53	172.53	148.752	0.923479	0.923479	26.6509	26.0141
Lawrence et al. 2006	846D	16	6	83-84	152.63	172.63	148.839	0.920456	0.920456	26.5593	25.9252
Lawrence et al. 2006	846D	16	6	83-84	152.63	172.63	148.839	0.918852	0.918852	26.5107	25.878
Lawrence et al. 2006	846D	16	6	93-94	152.73	172.73	148.926	0.912067	0.912067	26.3051	25.6784
Lawrence et al. 2006	846D	16	6	103-104	152.83	172.83	149.012	0.903134	0.903134	26.0344	25.4157
Lawrence et al. 2006	846D	16	6	113-114	152.93	172.93	149.099	0.899541	0.899541	25.9255	25.31
Lawrence et al. 2006	846D	16	6	123-124	153.03	173.03	149.186	0.890435	0.890435	25.6495	25.0422
Lawrence et al. 2006	846D	16	6	133-134	153.13	173.13	149.272	0.883988	0.883988	25.4542	24.8526
Lawrence et al. 2006	846D	16	6	143-144	153.23	173.23	149.359	0.891809	0.891809	25.6912	25.0826
Lawrence et al. 2006	846C	16		3	152.53	173.23	149.423	0.875852	0.875852	25.2076	24.6133
Lawrence et al. 2006	846D	16	7	3-4	153.33	173.33	149.441	0.886233	0.886233	25.5222	24.9186
Lawrence et al. 2006	846C	16		13	152.63	173.33	149.499	0.880726	0.880726	25.3553	24.7567
Lawrence et al. 2006	846D	16	7	13-14	153.43	173.43	149.521	0.894666	0.894666	25.7777	25.1666
Lawrence et al. 2006	846C	16		23	152.73	173.43	149.577	0.88978	0.88978	25.6297	25.0229
Lawrence et al. 2006	846D	16	7	23-24	153.53	173.53	149.601	0.917004	0.917004	26.4547	25.8237
Lawrence et al. 2006	846C	16		33	152.83	173.53	149.656	0.903497	0.903497	26.0454	25.4264
Lawrence et al. 2006	846D	16	7	33-34	153.63	173.63	149.68	0.929342	0.929342	26.8285	26.1865
Lawrence et al. 2006	846C	16		43	152.93	173.63	149.734	0.913339	0.913339	26.3436	25.7158
Lawrence et al. 2006	846D	16	7	43-44	153.73	173.73	149.76	0.91995	0.91995	26.5439	25.9103
Lawrence et al. 2006	846C	16		53	153.03	173.73	149.813	0.927233	0.927233	26.7646	26.1245
Lawrence et al. 2006	846C	16		63	153.13	173.83	149.891	0.920058	0.920058	26.5472	25.9135
Lawrence et al. 2006	846D	16	7	63-64	153.93	173.93	149.92	0.919426	0.919426	26.5281	25.8949
Lawrence et al. 2006	846C	16		73	153.23	173.93	149.969	0.92367	0.92367	26.6567	26.0197
Lawrence et al. 2006	846D	16	7	73-74	154.03	174.03	150.002	0.935242	0.935242	27.0073	26.36
Lawrence et al. 2006	846D	16	7	73-74	154.03	174.03	150.002	0.934228	0.934228	26.9766	26.3302
Lawrence et al. 2006	846C	16		83	153.33	174.03	150.048	0.925519	0.925519	26.7127	26.0741
Lawrence et al. 2006	846C	16		93	153.43	174.13	150.126	0.934036	0.934036	26.9708	26.3246
Lawrence et al. 2006	846C	16		103	153.53	174.23	150.205	0.930651	0.930651	26.8682	26.225
Lawrence et al. 2006	846C	16		113	153.63	174.33	150.283	0.929765	0.929765	26.8414	26.199
Lawrence et al. 2006	846D	17	1	3-4	154.63	174.63	150.328	0.930872	0.930872	26.8749	26.2315
Lawrence et al. 2006	846D	17	1	3-4	154.63	174.63	150.328	0.932467	0.932467	26.9232	26.2784
Lawrence et al. 2006	846C	16		123	153.73	174.43	150.362	0.936544	0.936544	27.0468	26.3984
Lawrence et al. 2006	846D	17	1	13-14	154.73	174.73	150.403	0.928742	0.928742	26.8104	26.1689
Lawrence et al. 2006	846C	16		133	153.83	174.53	150.44	0.931347	0.931347	26.8893	26.2455
Lawrence et al. 2006	846D	17	1	23-24	154.83	174.83	150.47	0.931123	0.931123	26.8825	26.2389
Lawrence et al. 2006	846C	16		143	153.93	174.63	150.519	0.928493	0.928493	26.8028	26.1616
Lawrence et al. 2006	846D	17	1	33-34	154.93	174.93	150.539	0.930407	0.930407	26.8608	26.2178
Lawrence et al. 2006	846C	16	7	3	154.03	174.73	150.597	0.919867	0.919867	26.5414	25.9079
Lawrence et al. 2006	846D	17	1	43-44	155.03	175.03	150.613	0.919948	0.919948	26.5439	25.9102
Lawrence et al. 2006	846C	16	7	13	154.13	174.83	150.676	0.91848	0.91848	26.4994	25.8671
Lawrence et al. 2006	846D	17	1	53-54	155.13	175.13	150.688	0.911601	0.911601	26.2909	25.6647
Lawrence et al. 2006	846C	16	7	23	154.23	174.93	150.754	0.910137	0.910137	26.2466	25.6217
Lawrence et al. 2006	846D	17	1	63-64	155.23	175.23	150.764	0.911234	0.911234	26.2798	25.654
Lawrence et al. 2006	846D	17	1	73-74	155.33	175.33	150.841	0.916898	0.916898	26.4515	25.8205
Lawrence et al. 2006	846D	17	1	83-84	155.43	175.43	150.919	0.922543	0.922543	26.6225	25.9866
Lawrence et al. 2006	846D	17	1	93-94	155.53	175.53	150.997	0.936186	0.936186	27.0359	26.3878
Lawrence et al. 2006	846D	17	1	103-104	155.63	175.63	151.076	0.940654	0.940654	27.1713	26.5192
Lawrence et al. 2006	846C	16	7	33	154.33	175.03	151.125	0.911547	0.911547	26.2893	25.6631
Lawrence et al. 2006	846D	17	1	113-114	155.73	175.73	151.155	0.938737	0.938737	27.1132	26.4629
Lawrence et al. 2006	846C	16	7	43	154.43	175.13	151.229	0.919807	0.919807	26.5396	25.9061
Lawrence et al. 2006	846D	17	1	123-124	155.83	175.83	151.235	0.930975	0.930975	26.878	26.2346
Lawrence et al. 2006	846D	17	1	123-124	155.83	175.83	151.235	0.931692	0.931692	26.8998	26.2556
Lawrence et al. 2006	846D	17	1	133-134	155.93	175.93	151.315	0.933295	0.933295	26.9483	26.3028
Lawrence et al. 2006	846D	17	1	133-134	155.93	175.93	151.315	0.933883	0.933883	26.9661	26.3201
Lawrence et al. 2006	846D	17	1	143-144	156.03	176.03	151.395	0.927934	0.927934	26.7859	26.1451
Lawrence et al. 2006	846D	17	2	3-4	156.13	176.13	151.477	0.937381	0.937381	27.0722	26.423
Lawrence et al. 2006	846D	17	2	13-14	156.23	176.23	151.569	0.94131	0.94131	27.1912	26.5385
Lawrence et al. 2006	846D	17	2	23-24	156.33	176.33	151.664	0.945943	0.945943	27.3316	26.6748
Lawrence et al. 2006	846D	17	2	33-34	156.43	176.43	151.758	0.942589	0.942589	27.23	26.5762
Lawrence et al. 2006	846D	17	2	43-44	156.53	176.53	151.853	0.942555	0.942555	27.229	26.5752
Lawrence et al. 2006	846D	17	2	53-54	156.63	176.63	151.949	0.945523	0.945523	27.3189	26.6624
Lawrence et al. 2006	846D	17	2	63-64	156.73	176.73	152.045	0.94833	0.94833	27.4039	26.745
Lawrence et al. 2006	846D	17	2	73-74	156.83	176.83	152.143	0.947362	0.947362	27.3746	26.7165
Lawrence et al. 2006	846D	17	2	73-74	156.83	176.83	152.143	0.945238	0.945238	27.3102	26.6541
Lawrence et al. 2006	846D	17	2	83-84	156.93	176.93	152.242	0.934557	0.934557	26.9866	26.3399
Lawrence et al. 2006	846D	17	2	93-94	157.03	177.03	152.344	0.91618	0.91618	26.4297	25.7994
Lawrence et al. 2006	846D	17	2	103-104	157.13	177.13	152.45	0.911487	0.911487	26.2875	25.6614
Lawrence et al. 2006	846D	17	2	113-114	157.23	177.23	152.569	0.910505	0.910505	26.2577	25.6325
Lawrence et al. 2006	846D	17	2	123-124	157.33	177.33	152.692	0.91346	0.91346	26.3473	25.7194
Lawrence et al. 2006	846D	17	2	133-134	157.43	177.43	152.811	0.921345	0.921345	26.5862	25.9513
Lawrence et al. 2006	846D	17	2	143-144	157.53	177.53	152.919	0.923438	0.923438	26.6496	26.0129
Lawrence et al. 2006	846D	17	3	3-4	157.63	177.63	153.02	0.925721	0.925721	26.7188	26.08
Lawrence et al. 2006	846D	17	3	13-14	157.73	177.73	153.12	0.929683	0.929683	26.8389	26.1966
Lawrence et al. 2006	846D	17	3	23-24	157.83	177.83	153.217	0.917862	0.917862	26.4807	25.8489
Lawrence et al. 2006	846D	17	3	23-24	157.83	177.83	153.217	0.931535	0.931535	26.895	26.251
Lawrence et al. 2006	846D	17	3	23-24	157.83	177.83	153.217	0.930426	0.930426	26.8614	26.2184
Lawrence et al. 2006	846D	17	3	33-34	157.93	177.93	153.315	0.93371	0.93371	26.9609	26.315
Lawrence et al. 2006	846D	17	3	33-34	157.93	177.93	153.315	0.933794	0.933794	26.9634	26.3175
Lawrence et al. 2006	846D	17	3	33-34	157.93	177.93	153.315	0.933546	0.933546	26.9559	26.3102
Lawrence et al. 2006	846D	17	3	43-44	158.03	178.03	153.411	0.934031	0.934031	26.9706	26.3244
Lawrence et al. 2006	846D	17	3	43-44	158.03	178.03	153.411	0.932074	0.932074	26.9113	26.2669
Lawrence et al. 2006	846D	17	3	53-54	158.13	178.13	153.508	0.936741	0.936741	27.0528	26.4042
Lawrence et al. 2006	846D	17	3	53-54	158.13	178.13	153.508	0.934405	0.934405	26.982	26.3354
Lawrence et al. 2006	846D	17	3	63-64	158.23	178.23	153.599	0.929749	0.929749	26.8409	26.1985
Lawrence et al. 2006	846D	17	3	63-64	158.23	178.23	153.599	0.927455	0.927455	26.7714	26.131
Lawrence et al. 2006	846D	17	3	73-74	158.33	178.33	153.679	0.944424	0.944424	27.2856	26.6301
Lawrence et al. 2006	846D	17	3	73-74	158.33	178.33	153.679	0.943286	0.943286	27.2511	26.5966
Lawrence et al. 2006	846D	17	3	83-84	158.43	178.43	153.759	0.935342	0.935342	27.0104	26.363
Lawrence et al. 2006	846D	17	3	83-84	158.43	178.43	153.759	0.933795	0.933795	26.9635	26.3175
Lawrence et al. 2006	846D	17	3	93-94	158.53	178.53	153.838	0.93436	0.93436	26.9806	26.3341
Lawrence et al. 2006	846D	17	3	93-94	158.53	178.53	153.838	0.934656	0.934656	26.9896	26.3428
Lawrence et al. 2006	846D	17	3	103-104	158.63	178.63	153.918	0.929798	0.929798	26.8423	26.1999
Lawrence et al. 2006	846D	17	3	103-104	158.63	178.63	153.918	0.92982	0.92982	26.843	26.2006
Lawrence et al. 2006	846D	17	3	113-114	158.73	178.73	153.997	0.942902	0.942902	27.2394	26.5853
Lawrence et al. 2006	846D	17	3	113-114	158.73	178.73	153.997	0.940808	0.940808	27.176	26.5238
Lawrence et al. 2006	846D	17	3	123-124	158.83	178.83	154.075	0.941362	0.941362	27.1928	26.5401
Lawrence et al. 2006	846D	17	3	123-124	158.83	178.83	154.075	0.939906	0.939906	27.1487	26.4972
Lawrence et al. 2006	846D	17	3	133-134	158.93	178.93	154.154	0.952543	0.952543	27.5316	26.8689
Lawrence et al. 2006	846D	17	3	133-134	158.93	178.93	154.154	0.954554	0.954554	27.5925	26.928
Lawrence et al. 2006	846D	17	3	143-144	159.03	179.03	154.232	0.949008	0.949008	27.4245	26.7649
Lawrence et al. 2006	846D	17	3	143-144	159.03	179.03	154.232	0.949675	0.949675	27.4447	26.7845
Lawrence et al. 2006	846D	17	4	3-4	159.13	179.13	154.309	0.947281	0.947281	27.3721	26.7141
Lawrence et al. 2006	846D	17	4	13-14	159.23	179.23	154.387	0.927808	0.927808	26.7821	26.1414
Lawrence et al. 2006	846D	17	4	23-24	159.33	179.33	154.465	0.931568	0.931568	26.896	26.252
Lawrence et al. 2006	846D	17	4	33-34	159.43	179.43	154.543	0.937252	0.937252	27.0683	26.4192
Lawrence et al. 2006	846D	17	4	43-44	159.53	179.53	154.621	0.935254	0.935254	27.0077	26.3604
Lawrence et al. 2006	846D	17	4	53-54	159.63	179.63	154.699	0.931219	0.931219	26.8854	26.2417
Lawrence et al. 2006	846D	17	4	63-64	159.73	179.73	154.778	0.937613	0.937613	27.0792	26.4298
Lawrence et al. 2006	846D	17	4	63-64	159.73	179.73	154.778	0.936236	0.936236	27.0375	26.3893
Lawrence et al. 2006	846D	17	4	73-74	159.83	179.83	154.856	0.935433	0.935433	27.0131	26.3657
Lawrence et al. 2006	846D	17	4	83-84	159.93	179.93	154.933	0.953682	0.953682	27.5661	26.9024
Lawrence et al. 2006	846D	17	4	93-94	160.03	180.03	155.011	0.954632	0.954632	27.5949	26.9304
Lawrence et al. 2006	846D	17	4	93-94	160.03	180.03	155.011	0.947948	0.947948	27.3923	26.7338
Lawrence et al. 2006	846D	17	4	93-94	160.03	180.03	155.011	0.949606	0.949606	27.4426	26.7825
Lawrence et al. 2006	846D	17	4	103-104	160.13	180.13	155.089	0.951874	0.951874	27.5113	26.8492
Lawrence et al. 2006	846D	17	4	103-104	160.13	180.13	155.089	0.948922	0.948922	27.4219	26.7624
Lawrence et al. 2006	846D	17	4	103-104	160.13	180.13	155.089	0.945515	0.945515	27.3186	26.6622
Lawrence et al. 2006	846D	17	4	113-114	160.23	180.23	155.167	0.934572	0.934572	26.987	26.3404
Lawrence et al. 2006	846D	17	4	113-114	160.23	180.23	155.167	0.933675	0.933675	26.9598	26.314
Lawrence et al. 2006	846D	17	4	113-114	160.23	180.23	155.167	0.928795	0.928795	26.812	26.1704
Lawrence et al. 2006	846D	17	4	113-114	160.23	180.23	155.167	0.929029	0.929029	26.8191	26.1773
Lawrence et al. 2006	846D	17	4	123-124	160.33	180.33	155.245	0.920496	0.920496	26.5605	25.9264
Lawrence et al. 2006	846D	17	4	123-124	160.33	180.33	155.245	0.918523	0.918523	26.5007	25.8683
